# Supplementary material for: Signatures of tumour immunity distinguish Asian and non-Asian gastric adenocarcinomas
Source: PubMed Central journal article supplement — Gut. 2014 Nov 10;64(11):1721–31. doi: 10.1136/gutjnl-2014-308252 (PMC4680172; doi:10.1136/gutjnl-2014-308252), 2014-11-10
Supplement: gutjnl-2014-308252-s1.pdf [file gutjnl-2014-308252-s1.pdf]

## Supplementary materials and methods (online only)

---

**Signatures of Tumour Immunity Distinguish Asian and Non-Asian Gastric Adenocarcinomas**

## Contents

|                                                                                                                                                                                                                |     |
|----------------------------------------------------------------------------------------------------------------------------------------------------------------------------------------------------------------|-----|
| Supplementary materials and methods: .....                                                                                                                                                                     | 4   |
| Datasets .....                                                                                                                                                                                                 | 4   |
| Data pre-processing.....                                                                                                                                                                                       | 4   |
| Microarray analysis .....                                                                                                                                                                                      | 5   |
| RUV-4 methodology.....                                                                                                                                                                                         | 5   |
| RUV-4 simulations.....                                                                                                                                                                                         | 6   |
| Assessment of RUV-4 methodology.....                                                                                                                                                                           | 6   |
| Pathway analyses comparing “Asian” versus “non-Asian” GCs.....                                                                                                                                                 | 7   |
| Immunohistochemistry assessments.....                                                                                                                                                                          | 7   |
| EBV and MMR assessments .....                                                                                                                                                                                  | 8   |
| Supplementary Table 1. Dataset information .....                                                                                                                                                               | 9   |
| Supplementary Table 2. List of housekeeping human genes derived from the article "Human Housekeeping genes are compact," published in Eisenberg E. and Levanon E.Y. (2003) Trends in Genetics 19: 362-365..... | 10  |
| Supplementary Table 3. Description of GSEA genesets.....                                                                                                                                                       | 25  |
| Supplementary Table 4. Differentially expressed genes derived from running RUV-4 (Affymetrix & non-Affymetrix platform datasets) .....                                                                         | 33  |
| Affymetrix platform cohorts .....                                                                                                                                                                              | 33  |
| non-Affymetrix platform cohorts.....                                                                                                                                                                           | 148 |
| Supplementary Table 5. Major pathway "inflammatory disease" and its sub-pathways (IPA results) .....                                                                                                           | 263 |
| Supplementary Table 6. Top 20 Curated genesets (C2-MSigDB) from GSEA ranked by normalised enrichment score (NES) for Affymetrix & non-Affymetrix platform datasets .....                                       | 266 |
| Supplementary Table 7. Top 20 Immunological genesets (C7-MSigDB) from GSEA on RUV-4 results for all Affymetrix platform cohorts ranked by normalised enrichment score (NES).....                               | 270 |
| Supplementary Table 8. MSigDB C7 T-cell signature genesets enriched in Stage-I meta-analysis .....                                                                                                             | 272 |
| Supplementary Table 9. Clinical characteristics of immunohistochemistry study cohorts .....                                                                                                                    | 273 |
| Supplementary Table 10. Assessment of immune markers between Caucasian (total n = 446) and Japanese cohorts (total n = 219).....                                                                               | 274 |
| Supplementary Table 11. Generalized linear model of Overall survival time against CD68/CD3 ratio and covariates significantly associated with survival .....                                                   | 275 |
| Supplementary Table 12. Restricted Mean Survival Time (RMST) at 1-year (12-months), 5-year (60-months) and 10-year (120-months) intervals .....                                                                | 277 |
| Supplementary Table 13. Correlation <sup>†</sup> of immune markers with other clinicopathologic factors .....                                                                                                  | 278 |

|                                                                                                                                                |     |
|------------------------------------------------------------------------------------------------------------------------------------------------|-----|
| Supplementary Table 14. Clinical characteristics of original cohorts from which immunohistochemical study cohorts are derived .....            | 279 |
| Supplementary Table 15. Top 20 Curated genesets (C6-MSigDB) from GSEA (before & after RUV-4) ranked by normalised enrichment score (NES) ..... | 280 |
| Supplementary Table 16. Assessment of Ki-67 marker between Caucasian and Japanese cohorts.....                                                 | 284 |
| Supplementary Figure 1.....                                                                                                                    | 285 |
| Supplementary Figure 2.....                                                                                                                    | 286 |
| Supplementary Figure 3.....                                                                                                                    | 287 |
| Supplementary Figure 4.....                                                                                                                    | 288 |
| Supplementary Figure 5.....                                                                                                                    | 289 |
| Supplementary Figure 6.....                                                                                                                    | 290 |
| Supplementary Figure 7.....                                                                                                                    | 291 |
| Supplementary Figure 8.....                                                                                                                    | 292 |
| Supplementary Figure 9.....                                                                                                                    | 293 |
| Supplementary Figure 10.....                                                                                                                   | 294 |
| Supplementary Figure 11.....                                                                                                                   | 295 |
| Supplementary Figure 12.....                                                                                                                   | 296 |
| Supplementary Figure 13.....                                                                                                                   | 297 |
| Supplementary Figure 14.....                                                                                                                   | 298 |
| References .....                                                                                                                               | 299 |

## Supplementary materials and methods:

### Datasets

*Microarray datasets:* 9 independent GC microarray datasets profiled on Affymetrix, Illumina and other custom platforms were obtained either from the National Centre for Biotechnology Information (NCBI) Gene Expression Omnibus or from collaborators (Supplementary Table 1). After pre-processing, a total of 1,016 tumour expression arrays - six from Asian geographic localities (i.e. HK\_cDNA, Korea\_SY, SamsungMC, SGset1, SGset2, YGC; n = 890), and three from non-Asian localities (i.e. AMS\_cDNA, AU\_affy, LEEDS; n = 126) were available for sample classification and downstream data analyses. For the purpose of comparisons between Affymetrix and non-Affymetrix datasets, only genes found across all platforms were selected for all downstream analyses.

*Tissue array datasets:* For the Japanese GC cohort, patients (n = 253) were selected from the database of the Kanagawa Cancer Centre, Department of Gastrointestinal Surgery, Yokohama, Japan. As these patients form part of another study investigating S1-therapy versus surgery, patients were pre-selected for stage (i.e. only stage II/III patients included). One stage I patient was included erroneously in the cohort and is included in the current study. Survival data were obtained from hospital records or from the city registry system. Supplementary Table 14 shows summary of patient clinical characteristics. For immunohistochemistry (IHC) assessments, 219 patient samples with CK staining data were selected from within this Japanese cohort so as to ensure selection of cases where we can control for difference in tumour content which may affect the amount of immune infiltration. The mean (range) age of the Japanese IHC cohort was 63.7 years (35 to 85 years). Ninety-two (42.0%) patients were treated by surgery only, while the remaining 127 (58.0%) patients were treated by both surgery and chemotherapy. For summary of Japanese IHC patient cohort demographics and clinicopathological data see Supplementary Table 9. Median follow-up time after surgery was 38.7 months. 78 patients had died by the end of follow-up period. No patients were lost to follow-up. For the Caucasian GC cohort, patients (n = 906) were selected from the database of Leeds Institute for Molecular Medicine, St James's University Hospital, Leeds, United Kingdom. Patient survival data were obtained from hospital records (see Supplementary Table 11 for summary of patient clinicopathological characteristics). For IHC assessments, 446 patient samples were selected at random from within this Caucasian cohort. The mean (range) age of the Caucasian IHC cohort was 67.3 years (13.5 to 96.0 years). Four hundred and forty (98.7%) patients were treated by surgery only, while the remaining 6 (1.4%) patients were treated by both surgery and chemotherapy. For summary of Caucasian IHC cohort patient demographics and clinicopathological data see Supplementary Table 9. Median follow-up time after surgery was 22.7 months. 312 patients had died by the end of follow-up period.

### Data pre-processing

For Affymetrix raw .CEL files, pre-processing was performed using the 'affyPLM' R package. This involved fitting a probe-level model on the data, assessing relative log expression (RLE) values, and normalizing unscaled standard errors (NUSE) for all the arrays. Outliers (i.e. those with RLE inter-quartile range greater than median  $\pm$  2 median absolute deviation and high NUSE values) were excluded prior to further downstream analyses. The raw expression values were normalized using the robust multi-array average algorithm in the 'affy' R package and log<sub>2</sub> transformed [1]. Summarization of multiple probes mapping to the same gene was performed by computing the median log<sub>2</sub> expression of the probes. For custom cDNA microarrays, partial raw expression data from summarized dual-channel datasets (e.g. HK\_cDNA and Korea\_SY) were log<sub>2</sub> transformed, median centred and scale normalized; while full raw expression data from other dual-channel datasets (e.g. AMS\_cDNA) were log<sub>2</sub> transformed, Lowess normalized, median centred, scale normalized and summarized. Missing values were imputed using a nearest neighbour averaging method in the 'impute' R package. Other datasets (e.g. YGC\_MD.Anderson, SamsungMC) were received in normalized form from collaborators. For these data sets, only summarization of multiple probes mapping to the same gene was performed. All pre-processing steps were conducted within the statistical computing language R environment version 2.15 (<http://www.r-project.org>). Prior to downstream RUV-4 adjustment and pathway analyses, all samples with known prior adjuvant treatment were removed and a common set of genes across platforms were used.

## Microarray analysis

Due to technical variation across different microarray cohorts, gene expression measurements are often influenced not only by biological factors of interest (e.g. geographic locality), but also by technical factors – including known/observed unwanted factors (e.g. batch of hybridization), and unknown/unobserved unwanted factors (e.g. RNA degradation). We used RUV-4[2] (a new method similar to RUV-2[3]) to reduce the impact of these unwanted factors (detailed in supplementary methods section on “*RUV-4 methodology*”; Supplementary Figures 1 and 2). Briefly, RUV-4 uses “negative control genes” (genes assumed to be uninfluenced by the biological factor of interest) to help identify the unwanted factors, which are then incorporated into a standard linear regression. In this study, housekeeping genes were used as controls (Supplementary Table 2). However, RUV-4 is distinct from standard normalization methods using housekeeping genes, where gene expression values are adjusted using weights derived from differences in housekeeping gene levels[2]. Specifically, to identify differentially expressed genes, RUV-4 fits a linear model on the expression data, accounting for known and unknown technical factors identified. In the process, two-group comparisons using empirical Bayes moderated t-statistics[4] are made (e.g. between “Asian” and “non-Asian” cohorts). Multiple hypothesis testing corrections were achieved using the Benjamini and Hochberg algorithm. Genes with adjusted  $p < 0.05$  were considered to be differentially expressed. Ingenuity Pathway Analysis (IPA) and Gene-Set-Enrichment-Analysis (GSEA) was performed (detailed in supplementary methods section on “*Pathway analyses comparing “Asian” versus “non-Asian” GCs*”) to identify expression modules and pathways distinct to Asian and non-Asian GCs. All top-ranked genesets were manually curated to confirm their accurate functional and pathway categorizations, and are presented in Supplementary Table 3. For this study, GSEA was used largely for exploratory analyses, and instead of applying a stringent FDR cut-off, we chose to analyze the top 10 genesets (ranked by normalized enrichment score) that were a) associated with each of the localities and also b) associated with low nominal p-values.

## RUV-4 methodology

RUV-4[2](A method similar to RUV-2[3]) was used to correct for unwanted variation in the expression data. Both RUV-2 and RUV-4 have been shown to perform favourably compared to similar methods[2, 3], such as ComBat[5] and other existing linear-regression-based methods[6, 7, 8, 9, 10]. We chose to use RUV-4 in our analysis instead of RUV-2 because RUV-2 performs very poorly in situations in which there is total confounding between the unwanted factors and the factor of interest. In our analysis, the factor of interest (locality) is indeed totally confounded with study.

RUV-4 is based on the model:

$$Y_{m \times n} = X_{m \times p} \beta_{p \times n} + Z_{m \times q} \gamma_{q \times n} + W_{m \times k} \alpha_{k \times n} + \varepsilon_{m \times n}$$

where

- Y is a matrix containing the gene expression data with m arrays (rows) and n genes (columns)
- X is a matrix containing the known factor(s) of interest
- Z is a matrix containing observed covariates. In our case, Z is just an intercept term, and  $q = 1$ .
- W is a matrix containing unknown (or unobserved) covariates (i.e. unwanted variation)
- $\beta$ ,  $\gamma$ , and  $\alpha$  are unobserved coefficients that determine the effect of each factor (X, Z and W respectively) on each gene’s expression value.
- $\varepsilon$  is an error term.

RUV-4 uses ‘control genes’ (genes that are assumed not to be influenced by the factor of interest, X) to find estimates for W and  $\alpha$ . All analyses were performed in R (version 2.15). The control genes used were housekeeping genes shown in Supplementary Table 2.

The algorithm for the RUV-4 method can be summarized as follows:

Step

1. Fit and remove X and Z (i.e. regress Y onto X and Z and retain the residuals).
2. Perform a factor analysis on the residuals from step 1 to get a “partial” estimate of W and  $\alpha$ . Only the component of W orthogonal to X and Z is properly estimated in this step.
3. Adjust the estimate for W (step 2) by using ‘control genes’ to estimate the correlation between X and W.
4. Regress Y onto X, Z, and the “adjusted estimate of W” (step 3) to estimate  $\beta$ .

For mathematical details refer to the technical report at <http://statistics.berkeley.edu/tech-reports/820>.

## RUV-4 simulations

The goal of the simulations was to generate simulated data similar to that of the real microarray data, but in which “truth” was known, so that we could calculate the signal-to-noise ratio both with and without adjustment by RUV-4. We generated 9 datasets (each meant to mimic one of the 9 real datasets), each according to the model:

$$Y_{m \times n} = X_{m \times p} \beta_{p \times n} + Z_{m \times q} \gamma_{q \times n} + W_{m \times k} \alpha_{k \times n} + \epsilon_{m \times n}$$

where

- m is chosen to match that of the corresponding real dataset, and  $n = 4700$
- X is a m by 1 matrix whose entries are all 0 for non-Asian datasets, and all 1 for Asian datasets.
- $\beta$  is a 1 by n matrix whose entries are independent and normally distributed. Note that the same  $\beta$  is used for all 9 datasets.
- Z is a m by 1 matrix of all 1s
- $\gamma$  is a 1 by n matrix whose entries are the gene means of the corresponding real dataset.
- W is a m by 20 matrix whose entries are independent standard normal.
- $\alpha$  is a 20 by n matrix whose entries are independent and normally distributed. Each row of  $\alpha$  has a different variance. The variances were chosen to match those of the corresponding real dataset (as approximated using the first 20 singular values of the real dataset).
- $\epsilon$  is a m by n matrix whose entries are independent and normally distributed. The variance of each gene was chosen to match that estimated in the corresponding real dataset.

We then combined the 4 simulated “affy” datasets and the 5 simulated “non-affy” datasets and performed differential expression analyses to estimate  $\beta$  on both datasets, both with and without RUV-4. To estimate the noise level, we calculated the RMS error of the estimate of  $\beta$  (by comparing the estimate to the “true”  $\beta$  in the simulation), and to measure the amount of signal present in the estimate of  $\beta$ , we regressed the estimate of  $\beta$  onto the true  $\beta$ . We then calculated the signal-to-noise ratio. We repeated this entire process 50 times, and averaged the results.

## Assessment of RUV-4 methodology

RUV-4 was employed on the Affymetrix datasets. To verify that the RUV-4 adjustment of the data was reasonable, a pre-determined list of differentially expressed genes (similar in family or identical to published genes) between gastric tumours from Eastern and Western populations[11] was used to compare the current data before and after RUV-4 adjustment. Comparing the logarithmic fold-change values of these genes, we found them to be more consistently up-regulated (or down-regulated) in Asian GCs (similarly for non-Asian GCs) after RUV-4, as compared to the values obtained prior to RUV-4 adjustment (Supplementary Figure 1). To further assess the RUV-4 methodology, GSEA was performed on the data, using MSigDB C6 (oncogenic signatures) genesets, before and after RUV-4 adjustment; the rationale of using C6 genesets was because the datasets were of cancer origin. By doing so, we found KRAS genesets to be more significantly enriched in non-Asian GC tumours when the analysis was performed on the RUV-4 adjusted data compared to that performed on the unadjusted data (Supplementary Table 14). As KRAS is involved primarily in the regulation of cell division, in cancer, oncogenic forms of KRAS can result in massive cell proliferation[12, 13]. To assess if proliferation was also enriched in non-Asian GC tumours,

we assessed key genes known to be involved in the cell-cycle (e.g. MCM proteins, cdc6, Ki-67, PCNA, cyclins and CDKs[14, 15, 16] . As shown in Supplementary Figure 2A, prior to RUV-4 adjustment, most of the proliferative genes were up-regulated in Asian compared to non-Asian tumours; after RUV-4 adjustment, the opposite was observed. Subsequent IHC staining using a proliferative marker (Ki-67) on both the Japanese and Caucasian cohorts also showed significantly higher levels of staining in the non-Asian (Caucasian) compared to the Asian (Japanese) GC tumours (Supplementary Figure 2B; Supplementary Table 15). However, since Ki-67 was found to be downregulated in the expression data after RUV-4 adjustment, the IHC results also imply that residual confounding between “study” and “locality” was probably present in the data. This is an issue with retrospective datasets, where there is no control over the design of the original study. Nonetheless, we show that on a broader disease-pathway level, RUV-4 is able to give us biological signals relevant to the examined datasets.

### Pathway analyses comparing “Asian” versus “non-Asian” GCs

*Ingenuity Pathway Analysis (IPA):* The “Core Analysis” function in IPA (Ingenuity System Inc, USA) (<http://www.ingenuity.com/>) was used to analyze differentially expressed genes between “Asian” and “non-Asian” GCs (Supplementary Table 2). The reference set used for interrogation included only genes in the Ingenuity Knowledge Base. Both up- and down-regulated genes were selected based on a threshold p-value of 0.05 derived from previous differential expression analysis. Generated networks were ordered by a score meaning significance, while the significance of pathways was determined by the Fisher Exact test p-value. The threshold significance level used to identify enriched pathways/ functions was  $p < 0.05$ .

*Gene-Set-Enrichment-Analysis (GSEA):* A ranked list of genes differentially expressed between “Asian” and “non-Asian” GCs (Supplementary Table 2) was uploaded to the Gene Set Enrichment Analysis (GSEA) software[17]. The list was then interrogated against gene-sets from MSigDB version 4, including C2 (133 gene-sets), C6 (189 gene-sets) and C7 (1910 gene-sets). These gene-sets corresponded to “curated” (based on online pathway databases, pubmed publications, and expert knowledge), “oncogenic signatures” (defined from cancer perturbation microarray data), and “immunologic signatures” (defined from immunologic study microarray data) gene-sets respectively. Computation of enrichment of gene-sets was based on the Kolmogorov-Smirnov statistic [17]. Given the lack of coherence in most expression datasets and the relatively small number of gene sets being analyzed, using a stringent FDR cut-off may lead one to overlook potentially interesting results. Hence, we have chosen to look at the top 10 genesets (ranked by normalized enrichment score) associated with the data from each of the localities. One of the criteria for exclusion is when a geneset has a high nominal p-value ( $p > 0.05$ ), this suggests that the signal for that geneset is absent in the data. When a top gene set has a small nominal p value and a high FDR value, it could be because the biological signal is subtle, or the gene sets do not represent the biology perfectly. This would generally be the case in our current study since we are interrogating expression data from heterogeneous primary tissue.

### Immunohistochemistry assessments

Slides from resection specimens were reviewed and a block with the highest tumour cell density was selected and marked for tissue microarray (TMA) construction. Samples from the leading edge were avoided as tumour cell density was usually lower in that area. Two 1.5mm diameter cores were sampled at random from the GC and one from matched non-neoplastic stomach mucosa. 4  $\mu$ m sections were cut from each TMA block, dried overnight and coated with a blank paraffin section before storage at 4 degrees Celsius until used. To ensure that immune cell infiltration studies could still be performed on these TMAs, we have previously assessed if differences exist between immune cell density measured from the whole tumour area, tumour centre, or invasive edge.[18] Generally, we did not observe any significant difference for most immune markers examined. Immunohistochemistry (IHC) including antigen-retrieval, blocking of endogenous peroxidase and endogenous biotin was carried out as previously described by Grabsch *et al* (2010)[19] using a streptavidin-biotin detection system (DakoREALTM Kit, Glostrup, Denmark) and 3,3'-Diaminobenzidine (DAB) according to the manufacturer’s instructions.. The primary antibodies used were mouse monoclonal antibodies against CD66b (1:200, clone G10F5, BD pharmigen), CD68 (1:200, clone PG-M1, DakoCytomation), CD45 (1:200, clone 2B11+PD7/26, DakoCytomation), CD3 (1:50, clone F7.2.38,

DakoCytomation), CD8 (1:200, clone C8/144B, DakoCytomation), FOXP3 (1:100, clone 236A/E7, Abcam), CD45RO (1:300, clone UCHL1, DakoCytomation) and cytokeratin (CK) (1:100, clone AE1/AE3, DakoCytomation). Antibodies were diluted with antibody diluent (Zymed Laboratories) and incubated either overnight at 4 degrees Celsius or for an hour at 37 degrees Celsius.. Immune cell markers used were: CD66b (neutrophils), CD68 (pan-macrophages), CD45 (pan-leucocytes), CD3 (T cells), CD8 (cytotoxic T cells), CD45RO (memory/activated T cells), FOXP3 (T regulatory cells) and Ki-67 (cell proliferation). Stained slides were scanned at x40 magnification using an Aperio XT digital slide scanner at Leeds Institute of Cancer Studies and Pathology and subjected to automated image analysis to detect and quantify immunoreactivity. An in-house developed software system, TMAi[20] was used to discriminate brown (immunopositive) pixels, blue (immunonegative) pixels and white (empty space) pixels. All cores were reviewed after the image analysis process by a senior GI histopathologist (HG) to confirm that (a) the detection of the brown DAB staining had been performed accurately by the software and (b) to exclude all cores which contained tumour cells as well as non-neoplastic epithelial cells, did not contain tumour at all or suffered from artefacts. The percentage immunoreactivity (Positive pixels/(positive pixels +negative pixels)\*100) from all available cores per case was averaged and used as a surrogate for the extent of immune cell infiltration. Finally, both unadjusted and tumour-content-adjusted IHC values are presented in Supplementary Table 5. Tumour-content-adjustment was performed by weighting raw values using CK staining values. Wilcoxon Mann-Whitney test was used on both unadjusted and adjusted median values to test if the presence of a particular marker is different between GCs from the Japanese and Caucasian cohorts. Results were similar in both cases. We report p-values for tumour-content-adjusted data. The rationale for adjusting for tumour content is to control for difference in tumour content, which may affect the amount of immune infiltration. The level of significance was taken at  $p < 0.05$ .

### **EBV and MMR assessments**

We investigated whether the immune differences between Asian and non-Asian GCs might be due to differences in Epstein-Barr virus (EBV), as 10% of GCs are caused by EBV and EBV-positive GCs are known to be lymphocyte-rich[21, 22]. T cells (CD8+ and CD4+) may also play an important role in EBV control[23]. We performed in situ hybridization for EBV on the Japanese (n = 247) and Caucasian (n = 805) cohorts. Levels of EBV positivity were very low and not significantly different between the cohorts (Japanese: 5% EBV positivity; Caucasian: 2% EBV positivity; Chi-square test  $p > 0.05$ ; Supplementary Figure 10). We also measured DNA mismatch repair (MMR) status in both cohorts, as MMR-positive GCs have also been reported to have increased numbers of intra-tumour lymphocytes[21, 24]. However, there was also no significant difference in MMR status between the Japanese (n = 22/247; 9%) and Caucasian (n = 25/264; 9%) cohorts (Chi-square test  $p > 0.05$ ; Supplementary Figure 11).



**Supplementary Table 1. Dataset information**

| Dataset   | Research centre                                                                               | Platform                              | #Features | #Samples (before pre-processing) | #Samples (after pre-processing + exclusion(s)*) | #Unique Genes | Pubmed ID (Source)                 |
|-----------|-----------------------------------------------------------------------------------------------|---------------------------------------|-----------|----------------------------------|-------------------------------------------------|---------------|------------------------------------|
| AU_affy   | Peter MacCullum Cancer Centre, Melbourne, Australia                                           | Affymetrix Human U133 Plus 2.0        | 54,675    | 70                               | 68                                              | 21,050        | PMID:22735568 (GSE35809)           |
| SGset1    | National Cancer Centre Singapore, Singapore                                                   | Affymetrix Human U133 Plus 2.0        | 54,675    | 200                              | 152                                             | 21,050        | PMID:22735568 (GSE15459)           |
| SGset2    | National Cancer Centre, Singapore, Singapore                                                  | Affymetrix Human U133 Plus 2.0        | 54,675    | 58                               | 55                                              | 21,050        | PMID: 23684942 (GSE34942)          |
| HK_cDNA   | Queen Mary Hospital, Hong Kong                                                                | Custom cDNA (dual-channel summarized) | 42,988    | 90                               | 90                                              | 13,975        | PMID: 12925757 (GSE2680)           |
| AMS_cDNA  | VU University Medical Centre, Amsterdam, The Netherlands                                      | Custom cDNA (dual-channel)            | 29,903    | 34                               | 34                                              | 17,933        | Unpublished (GSE37023)             |
| Korea_SY  | Yonsei Cancer Centre, Seoul Korea                                                             | Custom cDNA (dual-channel summarized) | 13,421    | 109                              | 96                                              | 8,214         | unpublished                        |
| SamsungMC | Samsung Medical Centre, South Korea                                                           | Whole Genome DASL assay               | 17,418    | 432                              | 432                                             | 13,510        | PMID: 24598828 (from collaborator) |
| LEEDS     | Leeds Institute for Molecular Medicine, St James's University Hospital, Leeds, United Kingdom | Affymetrix Human U133A and U133B      | 23,309*   | 29                               | 24                                              | 19,110        | Unpublished (GSE37023)             |
| YGC       | Yonsei University, South Korea                                                                | Illumina Human-6 v2                   | 48,803    | 65                               | 65                                              | 25,440        | PMID:22735568 (GSE13861)           |

\*exclusion(s) include "normal" samples and/or samples with prior adjuvant therapy

**Supplementary Table 2. List of housekeeping human genes derived from the article "Human Housekeeping genes are compact," published in Eisenberg E. and Levanon E.Y. (2003) Trends in Genetics 19: 362-365.**

| Gene.Symbol | Refseq.id |
|-------------|-----------|
| ACTB        | NM_001101 |
| ALDOA       | NM_000034 |
| GAPDH       | NM_002046 |
| PGK1        | NM_000291 |
| LDHA        | NM_005566 |
| RPS27A      | NM_002954 |
| RPL19       | NM_000981 |
| RPL11       | NM_000975 |
| NONO        | NM_007363 |
| ARHGDI1     | NM_004309 |
| RPL32       | NM_000994 |
| RPS18       | NM_022551 |
| HSP90AB1    | NM_007355 |
| ILF2        | NM_004515 |
| USP11       | NM_004651 |
| ATP6V1G1    | NM_004888 |
| UBA1        | NM_003334 |
| CSNK2B      | NM_001320 |
| CPNE1       | NM_003915 |
| CD40        | NM_001250 |
| CTNNA1      | NM_001904 |
| EIF3D       | NM_003753 |
| NDUFA1      | NM_004541 |
| ARAF        | NM_001654 |
| SAFB        | NM_002967 |
| ATP6AP1     | NM_001183 |
| HIST1H2BC   | NM_003526 |
| COX7A2L     | NM_004718 |
| ENSA        | NM_004436 |
| BTF3        | NM_001207 |
| IER2        | NM_004907 |
| ATP5J2      | NM_004889 |
| SRSF9       | NM_003769 |
| BUD31       | NM_003910 |
| CSTB        | NM_000100 |
| SLC9A3R2    | NM_004785 |
| MFSD10      | NM_001120 |

| <b>Gene.Symbol</b> | <b>Refseq.id</b> |
|--------------------|------------------|
| HADHA              | NM_000182        |
| VEGFB              | NM_003377        |
| STK24              | NM_003576        |
| P4HB               | NM_000918        |
| RAD9A              | NM_004584        |
| EFNA3              | NM_004952        |
| ARHGAP1            | NM_004308        |
| TAPBP              | NM_003190        |
| DDX39B             | NM_004640        |
| TKT                | NM_001064        |
| HLA-C              | NM_002117        |
| RAB1A              | NM_004161        |
| UBE2D2             | NM_003339        |
| UBE2M              | NM_003969        |
| GNAS               | NM_000516        |
| PTBP1              | NM_002819        |
| RPL36AL            | NM_001001        |
| C21orf33           | NM_004649        |
| GPI                | NM_000175        |
| COX7C              | NM_001867        |
| EIF4A2             | NM_001967        |
| COX6B1             | NM_001863        |
| FAU                | NM_001997        |
| GRIK5              | NM_002088        |
| COX5B              | NM_001862        |
| COX5A              | NM_004255        |
| 7-Sep              | NM_001788        |
| VAMP3              | NM_004781        |
| GPAA1              | NM_003801        |
| PABPN1             | NM_004643        |
| HSBP1              | NM_001537        |
| YARS               | NM_003680        |
| UBE2I              | NM_003345        |
| PABPC1             | NM_002568        |
| BLOC1S1            | NM_001487        |
| COX4I1             | NM_001861        |
| SPAG7              | NM_004890        |
| PSMD8              | NM_002812        |
| ZFP36L1            | NM_004926        |

| <b>Gene.Symbol</b> | <b>Refseq.id</b> |
|--------------------|------------------|
| ODC1               | NM_002539        |
| RPL18              | NM_000979        |
| RPL13              | NM_000977        |
| RPS11              | NM_001015        |
| CCND3              | NM_001760        |
| RPL14              | NM_003973        |
| PSMD11             | NM_002815        |
| TPMT               | NM_000367        |
| RPL8               | NM_000973        |
| MTA1               | NM_004689        |
| COL6A1             | NM_001848        |
| AP2M1              | NM_004068        |
| ATP5D              | NM_001687        |
| STK19              | NM_004197        |
| RPS25              | NM_001028        |
| RPS19              | NM_001022        |
| MAPKAPK2           | NM_004759        |
| AIF1               | NM_001623        |
| C14orf2            | NM_004894        |
| MAP4               | NM_002375        |
| RPS9               | NM_001013        |
| B4GALT3            | NM_003779        |
| CCBP2              | NM_001296        |
| RPS5               | NM_001009        |
| SGTA               | NM_003021        |
| H6PD               | NM_004285        |
| E2F4               | NM_001950        |
| ADAM15             | NM_003815        |
| ADD1               | NM_001119        |
| ADAR               | NM_001111        |
| PAX8               | NM_003466        |
| ANXA6              | NM_001155        |
| CHIT1              | NM_003465        |
| TAGLN              | NM_003186        |
| FOLR1              | NM_000802        |
| ACTN4              | NM_004924        |
| RING1              | NM_002931        |
| ACVRL1             | NM_000020        |
| CDA                | NM_001785        |

| <b>Gene.Symbol</b> | <b>Refseq.id</b> |
|--------------------|------------------|
| PTTG1IP            | NM_004339        |
| BANF1              | NM_003860        |
| JAG1               | NM_000214        |
| ID3                | NM_002167        |
| RHOA               | NM_001664        |
| CANX               | NM_001746        |
| ARF5               | NM_001662        |
| ARF4               | NM_001660        |
| ARF1               | NM_001658        |
| TSTA3              | NM_003313        |
| GDI2               | NM_001494        |
| SSR2               | NM_003145        |
| ADRBK1             | NM_001619        |
| ELAVL3             | NM_001420        |
| CAPZB              | NM_004930        |
| SNRPA              | NM_004596        |
| SDHA               | NM_004168        |
| PITPNM1            | NM_004910        |
| ILK                | NM_004517        |
| HDGF               | NM_004494        |
| GGT5               | NM_004121        |
| SEPT2              | NM_004404        |
| DAP                | NM_004394        |
| CSK                | NM_004383        |
| COX8A              | NM_004074        |
| ANXA2              | NM_004039        |
| SSTR5              | NM_001053        |
| CTBP1              | NM_001328        |
| CHD4               | NM_001273        |
| ZNF91              | NM_003430        |
| TTC1               | NM_003314        |
| TMBIM6             | NM_003217        |
| SRM                | NM_003132        |
| SGSH               | NM_000199        |
| PSME2              | NM_002818        |
| PRKAG1             | NM_002733        |
| PGD                | NM_002631        |
| PRDX1              | NM_002574        |
| NME2               | NM_002512        |

| <b>Gene.Symbol</b> | <b>Refseq.id</b> |
|--------------------|------------------|
| MTX1               | NM_002455        |
| MSN                | NM_002444        |
| MC2R               | NM_000529        |
| LTBP4              | NM_003573        |
| LMO1               | NM_002315        |
| IMPDH2             | NM_000884        |
| IFITM1             | NM_003641        |
| GRM4               | NM_000841        |
| GNAI2              | NM_002070        |
| GDI1               | NM_001493        |
| GAS1               | NM_002048        |
| FTH1               | NM_002032        |
| EIF4G2             | NM_001418        |
| DAXX               | NM_001350        |
| CNTN1              | NM_001843        |
| BSG                | NM_001728        |
| ARL2               | NM_001667        |
| ARF3               | NM_001659        |
| DYNLL1             | NM_003746        |
| HLA-G              | NM_002127        |
| HGS                | NM_004712        |
| RASSF7             | NM_003475        |
| ATP5A1             | NM_004046        |
| CSNK1E             | NM_001894        |
| SNX3               | NM_003795        |
| CTSD               | NM_001909        |
| PSMA7              | NM_002792        |
| PSMB7              | NM_002799        |
| LDHB               | NM_002300        |
| SREBF1             | NM_004176        |
| PSMB4              | NM_002796        |
| PSMB2              | NM_002794        |
| PSMB1              | NM_002793        |
| MYH9               | NM_002473        |
| CENPB              | NM_001810        |
| PFDN5              | NM_002624        |
| SYNGR2             | NM_004710        |
| AP1B1              | NM_001127        |
| H3F3A              | NM_002107        |

| <b>Gene.Symbol</b> | <b>Refseq.id</b> |
|--------------------|------------------|
| ARHGEF7            | NM_003899        |
| YWHAZ              | NM_003406        |
| MAP3K11            | NM_002419        |
| AES                | NM_001130        |
| EZR                | NM_003379        |
| PHF1               | NM_002636        |
| PFDN1              | NM_002622        |
| CKB                | NM_001823        |
| YWHAH              | NM_003405        |
| RNH1               | NM_002939        |
| SLC25A11           | NM_003562        |
| CYC1               | NM_001916        |
| PTMA               | NM_002823        |
| SNRPG              | NM_003096        |
| TUFM               | NM_003321        |
| YWHAB              | NM_003404        |
| RPA2               | NM_002946        |
| CD81               | NM_004356        |
| CALM2              | NM_001743        |
| ATP6V1F            | NM_004231        |
| H2AFY              | NM_004893        |
| NDUFB7             | NM_004146        |
| HMGB1              | NM_002128        |
| FCER2              | NM_002002        |
| GUK1               | NM_000858        |
| XRCC6              | NM_001469        |
| BECN1              | NM_003766        |
| MCM3AP             | NM_003906        |
| CSF1               | NM_000757        |
| HPCAL1             | NM_002149        |
| ATP6V0C            | NM_001694        |
| ATP6V0B            | NM_004047        |
| ATP6V1E1           | NM_001696        |
| COX7A2             | NM_001865        |
| COX6A1             | NM_004373        |
| FKBP1A             | NM_000801        |
| RPL29              | NM_000992        |
| RPL27              | NM_000988        |
| RPLP2              | NM_001004        |

| <b>Gene.Symbol</b> | <b>Refseq.id</b> |
|--------------------|------------------|
| RPLP1              | NM_001003        |
| GM2A               | NM_000405        |
| RPL3               | NM_000967        |
| ENO1               | NM_001428        |
| RPL38              | NM_000999        |
| RPL37              | NM_000997        |
| RPL34              | NM_000995        |
| RPL15              | NM_002948        |
| RPS2               | NM_002952        |
| RPS24              | NM_001026        |
| RPS16              | NM_001020        |
| RPS15              | NM_001018        |
| RPS13              | NM_001017        |
| RPL5               | NM_000969        |
| RPL17              | NM_000985        |
| POLR2A             | NM_000937        |
| RPS12              | NM_001016        |
| HNRNPK             | NM_002140        |
| HNRNPD             | NM_002138        |
| HNRNPAB            | NM_004499        |
| RPS10              | NM_001014        |
| MAZ                | NM_002383        |
| MYC                | NM_002467        |
| FBL                | NM_001436        |
| AP2S1              | NM_004069        |
| ACTG1              | NM_001614        |
| M6PR               | NM_002355        |
| SNRPD2             | NM_004597        |
| LGALS9             | NM_002308        |
| CYB5R3             | NM_000398        |
| COMT               | NM_000754        |
| MGAT1              | NM_002406        |
| EIF3C              | NM_003752        |
| DDT                | NM_001355        |
| FUS                | NM_004960        |
| ZBED1              | NM_004729        |
| RRBP1              | NM_004587        |
| NDUFS5             | NM_004552        |
| ERH                | NM_004450        |



| <b>Gene.Symbol</b> | <b>Refseq.id</b> |
|--------------------|------------------|
| B2M                | NM_004048        |
| LYZ                | NM_000239        |
| NME1               | NM_000269        |
| MVK                | NM_000431        |
| ENTPD6             | NM_001247        |
| UQCRC1             | NM_003365        |
| TXN                | NM_003329        |
| TUBB2A             | NM_001069        |
| TCOF1              | NM_000356        |
| SRP14              | NM_003134        |
| SRF                | NM_003131        |
| SOD1               | NM_000454        |
| SNRPB              | NM_003091        |
| SNRNP70            | NM_003089        |
| SRSF2              | NM_003016        |
| RPS6KB2            | NM_003952        |
| RPN1               | NM_002950        |
| PRKCSH             | NM_002743        |
| PNMT               | NM_002686        |
| PKM                | NM_002654        |
| PIM1               | NM_002648        |
| SLC25A3            | NM_002635        |
| NDUFC1             | NM_002494        |
| NDUFA2             | NM_002488        |
| MPG                | NM_002434        |
| MIF                | NM_002415        |
| JAK1               | NM_002227        |
| PRMT1              | NM_001536        |
| HADHB              | NM_000183        |
| GPX4               | NM_002085        |
| GP2                | NM_001502        |
| GOT2               | NM_002080        |
| EXTL3              | NM_001440        |
| EIF3F              | NM_003754        |
| EIF3G              | NM_003755        |
| EIF3I              | NM_003757        |
| DHCR7              | NM_001360        |
| DAD1               | NM_001344        |
| CYB5A              | NM_001914        |

| <b>Gene.Symbol</b> | <b>Refseq.id</b> |
|--------------------|------------------|
| CLTB               | NM_001834        |
| CLTA               | NM_001833        |
| TBCB               | NM_001281        |
| CAPNS1             | NM_001749        |
| ATP5O              | NM_001697        |
| ATP5G3             | NM_001689        |
| ATF4               | NM_001675        |
| APLP2              | NM_001642        |
| DNAJB6             | NM_005494        |
| HSPA8              | NM_006597        |
| PHGDH              | NM_006623        |
| RAP1B              | NM_015646        |
| INPP5K             | NM_016532        |
| ESYT1              | NM_015292        |
| SAP18              | NM_005870        |
| COPS6              | NM_006833        |
| ARPC4              | NM_005718        |
| ARPC3              | NM_005719        |
| SYNCRIP            | NM_006372        |
| BMI1               | NM_005180        |
| TERF2IP            | NM_018975        |
| ARPC2              | NM_005731        |
| STARD7             | NM_020151        |
| FEZ1               | NM_005103        |
| FBXO7              | NM_012179        |
| PLSCR3             | NM_020360        |
| PDAP1              | NM_014891        |
| BCAP31             | NM_005745        |
| ST5                | NM_005418        |
| PRPH               | NM_006262        |
| ZNF384             | NM_133476        |
| RRAGA              | NM_006570        |
| C1D                | NM_006333        |
| GABARAPL2          | NM_007285        |
| TADA3              | NM_006354        |
| SEC61G             | NM_014302        |
| HAX1               | NM_006118        |
| DNPEP              | NM_012100        |
| CNPPD1             | NM_015680        |

| <b>Gene.Symbol</b> | <b>Refseq.id</b> |
|--------------------|------------------|
| VOPP1              | NM_030796        |
| KXD1               | NM_024069        |
| EIF3K              | NM_013234        |
| C2orf27A           | NM_013310        |
| OTUB1              | NM_017670        |
| TRAP1              | NM_016292        |
| LMTK2              | NM_014916        |
| GPRIN2             | NM_014696        |
| ZNF592             | NM_014630        |
| IST1               | NM_014761        |
| SYNPO              | NM_007286        |
| COPE               | NM_007263        |
| ZNHIT1             | NM_006349        |
| UQCRH              | NM_006004        |
| ALG3               | NM_005787        |
| H2AFV              | NM_012412        |
| PLXNB2             | NM_012401        |
| PARK7              | NM_007262        |
| UBC                | NM_021009        |
| MARCKSL1           | NM_023009        |
| NELFB              | NM_015456        |
| RAD23A             | NM_005053        |
| UQCR11             | NM_006830        |
| GPR56              | NM_005682        |
| RERE               | NM_012102        |
| KIFC3              | NM_005550        |
| MCL1               | NM_021960        |
| PPP1R11            | NM_021959        |
| MLEC               | NM_014730        |
| UQCRQ              | NM_014402        |
| KAT7               | NM_007067        |
| TUBB3              | NM_006086        |
| TCF25              | NM_014972        |
| TMEM109            | NM_024092        |
| HLA-DRB4           | NM_021983        |
| TRIM27             | NM_006510        |
| RNPS1              | NM_006711        |
| DNAJB1             | NM_006145        |
| CGB7               | NM_033142        |

| <b>Gene.Symbol</b> | <b>Refseq.id</b> |
|--------------------|------------------|
| TIMM44             | NM_006351        |
| PUF60              | NM_014281        |
| ARL2BP             | NM_012106        |
| RELA               | NM_021975        |
| MFN2               | NM_014874        |
| AFG3L2             | NM_006796        |
| RUVBL2             | NM_006666        |
| DIAPH1             | NM_005219        |
| MYL12B             | NM_033546        |
| MXRA8              | NM_032348        |
| SNX22              | NM_024798        |
| TMSB10             | NM_021103        |
| SDR39U1            | NM_020195        |
| PTOV1              | NM_017432        |
| RNF44              | NM_014901        |
| ADAMTSL2           | NM_014694        |
| NEDD8              | NM_006156        |
| CCT7               | NM_006429        |
| SARS               | NM_006513        |
| PFN1               | NM_005022        |
| SDC3               | NM_014654        |
| RPL35              | NM_007209        |
| TUBA1B             | NM_006082        |
| NXF1               | NM_006362        |
| SLC6A7             | NM_014228        |
| AGPAT1             | NM_006411        |
| MRPL23             | NM_021134        |
| POLR2F             | NM_021974        |
| SEC61B             | NM_006808        |
| RPS14              | NM_005617        |
| HNRNPH1            | NM_005520        |
| TALDO1             | NM_006755        |
| MANF               | NM_006010        |
| AKAP17A            | NM_005088        |
| PTDSS1             | NM_014754        |
| FOXM1              | NM_021953        |
| RAC1               | NM_006908        |
| VAMP1              | NM_014231        |
| ABL1               | NM_005157        |

| <b>Gene.Symbol</b> | <b>Refseq.id</b> |
|--------------------|------------------|
| RAN                | NM_006325        |
| ATXN2L             | NM_007245        |
| RTN4               | NM_007008        |
| ZFPL1              | NM_006782        |
| JTB                | NM_006694        |
| NUDT3              | NM_006703        |
| CPNE6              | NM_006032        |
| GTPBP6             | NM_012227        |
| TAX1BP3            | NM_014604        |
| FCGR2A             | NM_021642        |
| JUND               | NM_005354        |
| NFKBIA             | NM_020529        |
| LAMP1              | NM_005561        |
| EFCAB14            | NM_014774        |
| SND1               | NM_014390        |
| MEA1               | NM_014623        |
| CHMP2A             | NM_014453        |
| CIZ1               | NM_012127        |
| CD3EAP             | NM_012099        |
| CALM1              | NM_006888        |
| RBPMS              | NM_006867        |
| RBM3               | NM_006743        |
| C1QL1              | NM_006688        |
| VAR5               | NM_006295        |
| TACC1              | NM_006283        |
| PIN1               | NM_006221        |
| LASP1              | NM_006148        |
| MT3                | NM_005954        |
| UQCRCF1            | NM_006003        |
| CCT3               | NM_005998        |
| VPS72              | NM_005997        |
| SLC6A8             | NM_005629        |
| KARS               | NM_005548        |
| ISLR               | NM_005545        |
| CFL1               | NM_005507        |
| NCL                | NM_005381        |
| MLF2               | NM_005439        |
| PRPF8              | NM_006445        |
| TOMM7              | NM_019059        |

| <b>Gene.Symbol</b> | <b>Refseq.id</b> |
|--------------------|------------------|
| MRC2               | NM_006039        |
| AKR1A1             | NM_006066        |
| PRRC2B             | NM_013318        |
| GNB2L1             | NM_006098        |
| CASC3              | NM_007359        |
| TMED9              | NM_017510        |
| BRMS1              | NM_015399        |
| APOBEC3C           | NM_014508        |
| UBB                | NM_018955        |
| CREB3              | NM_006368        |
| XPO7               | NM_015024        |
| MRPL9              | NM_031420        |
| PDCD6              | NM_013232        |
| MDH1               | NM_005917        |
| JAM3               | NM_032801        |
| MAP2K2             | NM_030662        |
| DPF2               | NM_006268        |
| YWHAQ              | NM_006826        |
| TEX261             | NM_144582        |
| DUOXA1             | NM_144565        |
| SLC25A1            | NM_005984        |
| COMMD4             | NM_017828        |
| SAR1A              | NM_020150        |
| PPP2R1A            | NM_014225        |
| SUMO2              | NM_006937        |
| TSFM               | NM_005726        |
| HSPA5              | NM_005347        |
| CNPY2              | NM_014255        |
| TMED2              | NM_006815        |
| MAPK8IP1           | NM_005456        |
| GNB2               | NM_005273        |
| LYPLA2             | NM_007260        |
| NDUFV1             | NM_007103        |
| BTBD2              | NM_017797        |
| ANAPC5             | NM_016237        |
| EIF1               | NM_005801        |
| DDOST              | NM_005216        |
| PRKD2              | NM_016457        |
| DRAP1              | NM_006442        |

| <b>Gene.Symbol</b> | <b>Refseq.id</b> |
|--------------------|------------------|
| MYL6               | NM_021019        |
| WDR1               | NM_005112        |
| RAB8A              | NM_005370        |
| TLN1               | NM_006289        |
| SCAMP3             | NM_005698        |
| CDK11A             | NM_024011        |
| RBM8A              | NM_005105        |
| RPL10              | NM_006013        |
| TSHZ1              | NM_005786        |
| RPL10A             | NM_007104        |
| TRIM28             | NM_005762        |
| AATF               | NM_012138        |
| ARHGEF18           | NM_015318        |
| RPL13A             | NM_012423        |
| POLR2L             | NM_021128        |
| TMEM147            | NM_032635        |
| XBP1               | NM_005080        |
| HYOU1              | NM_006389        |
| C9orf16            | NM_024112        |
| ERP29              | NM_006817        |
| TUT1               | NM_022830        |
| GSK3A              | NM_019884        |
| MRPS12             | NM_021107        |
| NDUFV2             | NM_021074        |
| CLSTN1             | NM_014944        |
| DAZAP2             | NM_014764        |
| CTDNEP1            | NM_015343        |
| DKK4               | NM_014420        |
| PAK4               | NM_005884        |
| PICK1              | NM_012407        |
| AHSA1              | NM_012111        |
| PCGF2              | NM_007144        |
| TCEB2              | NM_007108        |
| GABARAP            | NM_007278        |
| ATP5I              | NM_007100        |
| SUMO3              | NM_006936        |
| IDH3B              | NM_006899        |
| KDELRL1            | NM_006801        |
| KIF1C              | NM_006612        |

| <b>Gene.Symbol</b> | <b>Refseq.id</b> |
|--------------------|------------------|
| TUBGCP2            | NM_006659        |
| API5               | NM_006595        |
| ANP32B             | NM_006401        |
| RABAC1             | NM_006423        |
| HEXIM1             | NM_006460        |
| ATP5H              | NM_006356        |
| ACAT2              | NM_005891        |
| SRRM1              | NM_005839        |
| HINT1              | NM_005340        |
| ATP5G1             | NM_005175        |
| ALDOC              | NM_005165        |
| NDUFA7             | NM_005001        |
| EEF1A1             | NM_001402        |
| EEF1A2             | NM_001958        |
| EEF2               | NM_001961        |
| PPP1R10            | NM_002714        |
| PSMD2              | NM_002808        |
| PSMD3              | NM_002809        |
| CLOCK              | NM_004898        |
| RASSF1             | NM_007182        |
| EEF1D              | NM_032378        |
| MMPL1              | NM_004142        |
| SULT1A3            | NM_003166        |
| PPP2CB             | NM_004156        |
| ZNF305             | NM_014724        |
| PRO1843            | NM_018507        |
| REA                | NM_007273        |
| RE2                | NM_007369        |
| KIAA0618           | NM_014833        |
| G2AN               | NM_014610        |
| NACA               | NM_005594        |



**Supplementary Table 3. Description of GSEA genesets**

| Descriptions of top 20 curated genesets (C2-MSigDB) from GSEA on RUV-4 results for all Affymetrix platform cohorts |                       |                                                                                                                                                                                                                                                   |                          |
|--------------------------------------------------------------------------------------------------------------------|-----------------------|---------------------------------------------------------------------------------------------------------------------------------------------------------------------------------------------------------------------------------------------------|--------------------------|
| Geneset                                                                                                            | Category <sup>†</sup> | Description                                                                                                                                                                                                                                       | Reference (PMID/ others) |
| UZONYI_RESPONSE_TO_LEUKOTRIENE_AND_THROMBIN                                                                        | Vasculature-related   | Genes up-regulated in HUVEC cells (primary endothelium) after stimulation with leukotriene LTD4 [PubChem=3908] or thrombin (F2) [GeneID=2147] for 1 h. Stimulated HUVEC cells in turn activate proinflammatory genes involved in vascular injury. | 16606835 (PMID)          |
| SENGUPTA_NASOPHARYNGEAL_CARCINOMA_DN                                                                               | Tumorigenesis-related | Genes down-regulated in nasopharyngeal carcinoma relative to the normal tissue.                                                                                                                                                                   | 16912175 (PMID)          |
| CROMER_TUMORIGENESIS_DN                                                                                            | Tumorigenesis-related | Tumorigenesis markers of head and neck squamous cell carcinoma (HNSCC): down-regulated in the 'early' tumours vs normal samples.                                                                                                                  | 14676830 (PMID)          |
| BERTUCCI_INVASIVE_CARCINOMA_DUCTAL_VS_LOBULAR_DN                                                                   | Tumorigenesis-related | Genes down-regulated in the invasive ductal carcinoma (IDC) compared to the invasive lobular carcinoma (ILC), the two major pathological types of breast cancer.                                                                                  | 18490921 (PMID)          |
| SMID_BREAST_CANCER_LUMINAL_A_UP                                                                                    | Tumorigenesis-related | Genes up-regulated in the luminal A subtype of breast cancer.                                                                                                                                                                                     | 18451135 (PMID)          |
| PETRETTO_CARDIAC_HYPERTROPHY                                                                                       | Others                | Genes that correlated most highly with left ventricular mass (LVM) index.                                                                                                                                                                         | 18443592 (PMID)          |
| YAMASHITA_METHYLATED_IN_PROSTATE_CANCER                                                                            | Methylation-related   | Genes up-regulated in prostate cancer cell lines after treatment with demethylating agent 5-aza-2'-deoxycytidine (decitabine) [PubChem=451668]. These up-regulated genes represent methylation-silenced genes.                                    | 18381416 (PMID)          |
| SMID_BREAST_CANCER_RELAPSE_IN_BONE_UP                                                                              | Metastasis-related    | Genes up-regulated in bone relapse/ metastasis of breast cancer.                                                                                                                                                                                  | 18451135 (PMID)          |
| KLEIN_TARGETS_OF_BCR_ABL1_FUSION                                                                                   | Immune-related        | Genes changed in pre-B lymphoblastic leukemia cells with BCR-ABL1 fusion [GeneID=613][GeneID=25] vs normal pre-B lymphocytes.                                                                                                                     | 16205638 (PMID)          |

|                                                     |                                         |                                                                                                                                                                                                                                                                            |                 |
|-----------------------------------------------------|-----------------------------------------|----------------------------------------------------------------------------------------------------------------------------------------------------------------------------------------------------------------------------------------------------------------------------|-----------------|
| HAHTOLA_SEZARY_SYNDROM_DN                           | Immune-related                          | Genes down-regulated in monocytes isolated from peripheral blood samples of Sezary syndrom patients compared to those from healthy normal donors.                                                                                                                          | 16914566 (PMID) |
| FLECHNER_BIOPSY_KIDNEY_TRANSPLANT_REJECTED_VS_OK_UP | Immune-related                          | Genes up-regulated in kidney biopsies from patients with acute transplant rejection compared to the biopsies from patients with well functioning kidneys more than 1-year post transplant. These up-regulated genes are largely involved in immune/ inflammatory response. | 15307835 (PMID) |
| RICKMAN_HEAD_AND_NECK_CANCER_D                      | Immune-related                          | Cluster d: genes identifying an intrinsic group in head and neck squamous cell carcinoma (HNSCC). Using ontology-based assessments, these genes were identified in the source publication to be involved in immune function.                                               | 18679425 (PMID) |
| STOSSI_RESPONSE_TO ESTRADIOL                        | Estrogen regulation                     | Genes up-regulated by estradiol (E2) [PubChem=5757] in U2OS cells (osteosarcoma) expressing ESR1 or ESR2 [GeneID=2099;2100].                                                                                                                                               | 15033914 (PMID) |
| BOSCO_EPITHELIAL_DIFFERENTIATION_MODULE             | Development/<br>differentiation-related | Genes representing epithelial differentiation module in sputum during asthma exacerbations i.e. enriched for genes that are associated with the mucociliary differentiation of airway epithelial cells.                                                                    | 20336062 (PMID) |
| ENGELMANN_CANCER_PROGENITORS_DN                     | Development/<br>differentiation-related | Down-regulated genes in the cancer progenitor (stem) cells corresponding to side population (SP) MCF7 cells (breast cancer) positive for MUC1 [GeneID=4582].                                                                                                               | 18381450 (PMID) |
| BOQUEST_STEM_CELL_UP                                | Development/<br>differentiation-related | Genes up-regulated in freshly isolated CD31- [GeneID=5175] (stromal stem cells from adipose tissue) versus the CD31+ (non-stem) counterparts.                                                                                                                              | 15635089 (PMID) |
| GEORGANTAS_HSC_MARKERS                              | Development/<br>differentiation-related | Genes up-regulated in HSC (hematopoietic stem cells) compared to HPC (hematopoietic progenitor cells).                                                                                                                                                                     | 15231652 (PMID) |
| NAKAYAMA_SOFT_TISSUE_TUMORS_PCA2_DN                 | Development/<br>differentiation-related | Top 100 probe sets contributing to the negative side of the 2nd principal component; associated with adipocytic differentiation.                                                                                                                                           | 17464315 (PMID) |

|                                  |                   |                                                                                                                                                                                                                                                                                                                                                                                                                                                                                                                                                                                                                                                                                                       |                                                                                                                                |
|----------------------------------|-------------------|-------------------------------------------------------------------------------------------------------------------------------------------------------------------------------------------------------------------------------------------------------------------------------------------------------------------------------------------------------------------------------------------------------------------------------------------------------------------------------------------------------------------------------------------------------------------------------------------------------------------------------------------------------------------------------------------------------|--------------------------------------------------------------------------------------------------------------------------------|
| URS_ADIPOCYTE_DIFFERENTIATION_UP | Adipocyte-related | Genes up-regulated in primary adipocytes compared to preadipocytes.                                                                                                                                                                                                                                                                                                                                                                                                                                                                                                                                                                                                                                   | 15051823 (PMID)                                                                                                                |
| KEGG_PPAR_SIGNALING_PATHWAY      | Adipocyte-related | PPAR signalling pathway; Peroxisome proliferator-activated receptors (PPARs) are nuclear hormone receptors that are activated by fatty acids and their derivatives. PPAR has three subtypes (PPARalpha, beta/delta, and gamma) showing different expression patterns in vertebrates. Each of them is encoded in a separate gene and binds fatty acids and eicosanoids. PPARalpha plays a role in the clearance of circulating or cellular lipids via the regulation of gene expression involved in lipid metabolism in liver and skeletal muscle. PPARbeta/delta is involved in lipid oxidation and cell proliferation. PPARgamma promotes adipocyte differentiation to enhance blood glucose uptake. | <a href="http://www.genome.jp/kegg/pathway/hsa/hsa03320.html">http://www.genome.jp/kegg/pathway/hsa/hsa03320.html</a> (others) |

**Descriptions of top 20 immunological genesets (C7-MSigDB) from GSEA on RUV-4 results for all Affymetrix platform cohorts**

| <b>Geneset</b>                                             | <b>Category<sup>†</sup></b> | <b>Description</b>                                                                                                                                                                                                                                                                                       | <b>Reference (PMID/ others)</b> |
|------------------------------------------------------------|-----------------------------|----------------------------------------------------------------------------------------------------------------------------------------------------------------------------------------------------------------------------------------------------------------------------------------------------------|---------------------------------|
| GSE24634_TREG_VS_TCONV_POST_DAY10_IL4_CONVERSION_DN        | T-cell signature            | Genes down-regulated in comparison of CD25+ regulatory T cell (Treg) treated with IL4[GeneID=3565] at day 10 versus CD25- T cells treated with IL4 [GeneID=3565] at 10 day i.e. genes differentially expressed in peripheral Treg cells compared to CD25- control cells at 10 days post IL-4 stimulation | 21347372                        |
| GSE1460_INTRATHYMIC_T_PROGENITOR_VS_THYMIC_STROMAL_CELL_DN | Thymic stromal signature    | Genes down-regulated in comparison of intrathymic T progenitor cells (ITTP) versus thymic stromal cells. These genes are found to be up-regulated in later stages of T-cell development.                                                                                                                 | 15210650                        |
| GSE3982_MAC_VS_TH2_DN                                      | T-cell signature            | Genes down-regulated in comparison of macrophages versus Th2 cells.                                                                                                                                                                                                                                      | 16474395                        |
| GSE22886_TCELL_VS_BCELL_NAIVE_UP                           | T-cell signature            | Genes up-regulated in comparison of naive CD4 [GeneID=920] CD8 T cells versus naive B cells.                                                                                                                                                                                                             | 15789058                        |
| GSE24634_NAIVE_CD4_TCELL_VS_DAY3_IL4_CONV_TREG_UP          | T-cell signature            | Genes up-regulated in comparison of naive T cells at day 0 versus CD25+ regulatory T cell (Treg) treated with IL4 [GeneID=3565] at day 3.                                                                                                                                                                | 21347372                        |
| GSE22886_NAIVE_CD8_TCELL_VS_MONOCYTE_UP                    | T-cell signature            | Genes up-regulated in comparison of naive CD8 T cells versus day 0 monocytes.                                                                                                                                                                                                                            | 15789058                        |
| GSE22886_NAIVE_CD4_TCELL_VS_MONOCYTE_UP                    | T-cell signature            | Genes up-regulated in comparison of naive CD4 [GeneID=920] T cells versus day 0 monocytes.                                                                                                                                                                                                               | 15789058                        |
| GSE24142_EARLY_THYMIC_PROGENITOR_VS_DN2_THYMOCYTE_FETAL_DN | T-cell signature            | Genes down-regulated in comparison of thymic progenitors versus fetal DN2 thymocytes.                                                                                                                                                                                                                    | 22581009                        |

|                                                              |                                                       |                                                                                                                                                                                                                                                                                                                                                                                                                                                                 |          |
|--------------------------------------------------------------|-------------------------------------------------------|-----------------------------------------------------------------------------------------------------------------------------------------------------------------------------------------------------------------------------------------------------------------------------------------------------------------------------------------------------------------------------------------------------------------------------------------------------------------|----------|
| GSE17974_IL4_AND_ANTI_IL12_VS_UNTREATED_72H_ACT_CD4_TCELL_UP | T-cell signature                                      | Genes up-regulated in comparison of CD4 [GeneID=920] T cells treated with IL4 [GeneID=3565] and anti-IL12 at 72 h versus the untreated cells at 72 h.                                                                                                                                                                                                                                                                                                           | 20620947 |
| GSE24142_EARLY_THYMIC_PROGENITOR_VS_DN3_THYMOCYTE_FETAL_UP   | Thymic progenitor signature                           | Genes up-regulated in comparison of thymic progenitors versus fetal DN3 thymocytes.                                                                                                                                                                                                                                                                                                                                                                             | 22581009 |
| GSE9988_ANTI_TREM1_VS_VEHICLE_TREATED_MONOCYTES_UP           | Monocyte signature                                    | Genes up-regulated in comparison of monocytes treated with anti-TREM1 [GeneID=54210] versus monocytes treated with vehicle. Proinflammatory genes.                                                                                                                                                                                                                                                                                                              | 18292579 |
| GSE9988_LPS_VS_LPS_AND_ANTI_TREM1_MONOCYTE_DN                | Monocyte signature                                    | Genes down-regulated in comparison of monocytes treated with 5000 ng/ml LPS (TLR4 agonist) versus monocytes treated with anti-TREM1 [GeneID=54210]. Proinflammatory genes.                                                                                                                                                                                                                                                                                      | 18292579 |
| GSE9988_ANTI_TREM1_VS_CTRL_TREATED_MONOCYTES_UP              | Monocyte signature                                    | Genes up-regulated in comparison of monocytes treated with anti-TREM1 [GeneID=54210] versus monocytes treated with control IgG. Proinflammatory genes.                                                                                                                                                                                                                                                                                                          | 18292579 |
| GSE9006_TYPE_1_VS_TYPE_2_DIABETES_PBMC_AT_DX_UP              | Dysregulation of innate and adaptive immune signature | Genes up-regulated in peripheral blood mononuclear cells (PBMC) from patients with type 1 diabetes at the time of diagnosis versus those with type 2 diabetes at the time of diagnosis. Note: Type 1 diabetes (T1D) is accompanied by changes in gene expression in peripheral blood mononuclear cells (PBMCs) due to dysregulation of adaptive and innate immunity, counterregulatory responses to immune dysregulation, insulin deficiency and hyperglycemia. | 17595242 |

|                                                    |                                                       |                                                                                                                                                                                                                                                                                                                                                                                                                                                       |          |
|----------------------------------------------------|-------------------------------------------------------|-------------------------------------------------------------------------------------------------------------------------------------------------------------------------------------------------------------------------------------------------------------------------------------------------------------------------------------------------------------------------------------------------------------------------------------------------------|----------|
| GSE9006_HEALTHY_VS_TYPE_1_DIABETES_PBMC_AT_DX_DN   | Dysregulation of innate and adaptive immune signature | Genes down-regulated in comparison of peripheral blood mononuclear cells (PBMC) from healthy donors versus PBMCs from patients with type 1 diabetes at the time of diagnosis. Note: Type 1 diabetes (T1D) is accompanied by changes in gene expression in peripheral blood mononuclear cells (PBMCs) due to dysregulation of adaptive and innate immunity, counterregulatory responses to immune dysregulation, insulin deficiency and hyperglycemia. | 17595242 |
| GSE3982_DC_VS_TH2_UP                               | Dendritic cell signature                              | Genes up-regulated in comparison of dendritic cells (DC) versus Th2 cells.                                                                                                                                                                                                                                                                                                                                                                            | 16474395 |
| GSE3982_DC_VS_CENT_MEMORY_CD4_TCELL_UP             | Dendritic cell signature                              | Genes up-regulated in comparison of dendritic cells (DC) versus central memory CD4[GeneID=920] T cells.                                                                                                                                                                                                                                                                                                                                               | 16474395 |
| GSE17721_LPS_VS_POLYIC_0.5H_BMDM_UP                | Dendritic cell signature                              | Genes up-regulated in comparison of dendritic cells (DC) stimulated with LPS (TLR4 agonist) at 0.5 h versus DC cells stimulated with poly(I:C) (TLR3 agonist) at 0.5 h.                                                                                                                                                                                                                                                                               | 19729616 |
| GSE22886_IGG_IGA_MEMORY_BCELL_VS_BM_PLASMA_CELL_UP | B-cell signature                                      | Genes up-regulated in comparison of memory IgG IgA B cells versus plasma cells from bone marrow and blood.                                                                                                                                                                                                                                                                                                                                            | 15789058 |
| GSE10325_BCELL_VS_MYELOID_UP                       | B-cell signature                                      | Genes up-regulated in comparison of healthy B cells versus healthy myeloid cells.                                                                                                                                                                                                                                                                                                                                                                     | 18275831 |

| Descriptions of top 20 curated genesets (C2-MisgDB) from GSEA on RUV-4 results for all non-Affymetrix platform cohorts |                          |                                                                                                                                                                                                         |                          |
|------------------------------------------------------------------------------------------------------------------------|--------------------------|---------------------------------------------------------------------------------------------------------------------------------------------------------------------------------------------------------|--------------------------|
| Geneset                                                                                                                | Category <sup>†</sup>    | Description                                                                                                                                                                                             | Reference (PMID/ others) |
| SHEDDEN_LUNG_CANCER_GOOD_SURVIVAL_A12                                                                                  | Immune-related           | Cluster 12 of method A: up-regulation of these genes in patients with non-small cell lung cancer (NSCLC) predicts good survival outcome. Cluster 12 contains many immunological-related genes.          | 18641660 (PMID)          |
| JAEGER_METASTASIS_DN                                                                                                   | Tumorigenesis-related    | Genes down-regulated in metastases from malignant melanoma compared to the primary tumours.                                                                                                             | 17289871 (PMID)          |
| CHIBA_RESPONSE_TO_TSA_UP                                                                                               | Tumorigenesis-related    | Cancer related genes up-regulated in any of four hepatoma cell lines following 24 h treatment with TSA [PubChem=5562].                                                                                  | 15452378 (PMID)          |
| HUMMERICH_SKIN_CANCER_PROGRESSION_UP                                                                                   | Tumorigenesis-related    | Selected genes up-regulated during progression through benign to malignant skin tumours formed by treatment with DMBA and TPA [PubChem=6001;4792] chemicals in the two stage skin carcinogenesis model. | 16247483 (PMID)          |
| CROMER_TUMORIGENESIS_UP                                                                                                | Tumorigenesis-related    | Tumorigenesis markers of head and neck squamous cell carcinoma (HNSCC): up-regulated in the 'early' tumours vs normal samples.                                                                          | 14676830 (PMID)          |
| KONDO_PROSTATE_CANCER_HCP_WITH_H3K27ME3                                                                                | Transcription regulation | Genes with high histone H3 trimethylation mark at K27 (H3K27me3) in PC3 cells (prostate cancer) by ChIP-chip assay on a 12K CpG array (high-CpG-density promoters, HCP).                                | 18488029 (PMID)          |
| NIELSEN_GIST_AND_SYNOVIAL_SARCOMA_DN                                                                                   | Stromal-related          | Top 20 genes whose down-regulation correlated with gastrointestinal stromal tumours (GIST) and synovial sarcoma compared to other tumours.                                                              | 11965276 (PMID)          |
| HSIAO_LIVER_SPECIFIC_GENES                                                                                             | Others                   | Liver selective genes                                                                                                                                                                                   | 11773596 (PMID)          |
| WINZEN_DEGRADED_VIA_KHSRP                                                                                              | Inflammation-related     | Transcripts (mRNA molecules) rapidly degraded upon interaction with KHSRP[GeneID=8570]. KHSRP functions as a limiting factor in inflammatory gene expression.                                           | 17908789 (PMID)          |
| SCHLOSSER_SERUM_RESPONSE_UP                                                                                            | Immune-related           | Cluster 1: genes up-regulated in B493-6 cells (B lymphocytes) upon serum stimulation but not by affected by MYC [GeneID=4609].                                                                          | 15516975 (PMID)          |
| LEE_DIFFERENTIATING_T_LYMPHOCYTE                                                                                       | Immune-related           | Genes enriched at every T lymphocyte differentiation stage compared to the early passage fetal thymic stromal cultures (TSC).                                                                           | 15210650 (PMID)          |

|                                                  |                                      |                                                                                                                                                                                                                                                                                                                                            |                                                                                                                                                                  |
|--------------------------------------------------|--------------------------------------|--------------------------------------------------------------------------------------------------------------------------------------------------------------------------------------------------------------------------------------------------------------------------------------------------------------------------------------------|------------------------------------------------------------------------------------------------------------------------------------------------------------------|
| SHAFFER_IRF4_TARGETS_IN_ACTIVATED_DENDRITIC_CELL | Immune-related                       | IRF4 [GeneID=3662] target genes up-regulated in plasmacytoid dendritic cells compared to monocytes. The transcription factor IRF4 (interferon regulatory factor 4) is required during an immune response for lymphocyte activation and the generation of immunoglobulin-secreting plasma cells.                                            | 18568025 (PMID)                                                                                                                                                  |
| ZHAN_VARIABLE_EARLY_DIFFERENTIATION_GENES_DN     | Development/ differentiation-related | The vEDG down-regulated set: most variable early differentiation genes (EDG) with similar expression patterns in tonsil B lymphocytes (TBC) and multiple myeloma (MM) cells compared to the plasma cells from tonsil (TPC) and bone marrow (BPC).                                                                                          | 12393520 (PMID)                                                                                                                                                  |
| HOWLIN_PUBERTAL_MAMMARY_GLAND                    | Development/ differentiation-related | Genes up-regulated in pubertal mammary glands compared to mammary glands from other developmental stages. These include key mediators of pubertal ductal morphogenesis.                                                                                                                                                                    | 16278680 (PMID)                                                                                                                                                  |
| HUPER_BREAST_BASAL_VS_LUMINAL_UP                 | Development/ differentiation-related | Genes up-regulated in basal mammary epithelial cells compared to the luminal ones.                                                                                                                                                                                                                                                         | 17409405 (PMID)                                                                                                                                                  |
| REACTOME_MITOTIC_G1-G1_S_PHASES                  | Cell-cycle-related                   | Genes involved in Mitotic G1-G1/S phases                                                                                                                                                                                                                                                                                                   | <a href="http://www.reactome.org/cgi-bin/eventbrowser_st_id?ST_ID=REACT_21267">http://www.reactome.org/cgi-bin/eventbrowser_st_id?ST_ID=REACT_21267</a> (others) |
| REACTOME_G2_M_CHECKPOINTS                        | Cell-cycle-related                   | Genes involved in G2/M Checkpoints                                                                                                                                                                                                                                                                                                         | <a href="http://www.reactome.org/cgi-bin/eventbrowser_st_id?ST_ID=REACT_828">http://www.reactome.org/cgi-bin/eventbrowser_st_id?ST_ID=REACT_828</a> (others)     |
| PID_FOXM1PATHWAY                                 | Cell-cycle-related                   | FOXM1 transcription factor network                                                                                                                                                                                                                                                                                                         | 18832364 (PMID)                                                                                                                                                  |
| DIRMEIER_LMP1_RESPONSE_LATE_DN                   | Cell-cycle-related                   | Cluster 4: genes down-regulated in B2264-19/3 cells (primary B lymphocytes) within 60-180 min after activation of LMP1 (an oncogene encoded by Epstein-Barr virus, EBV). LMP1's signals were found to be essential for the G1/S transition in human B cells; cells lacking LMP1's signals are cell cycle arrested and survive quiescently. | 15674340 (PMID)                                                                                                                                                  |
| ZHAN_MULTIPLE_MYELOMA_CD1_DN                     | Cell-cycle-related                   | Top 50 down-regulated genes in cluster CD-1 of multiple myeloma samples with the characteristic expression spike of CCND1 [GeneID=595]. CCND1 is cell-cycle related.                                                                                                                                                                       | 16728703 (PMID)                                                                                                                                                  |



**Supplementary Table 4. Differentially expressed genes derived from running RUV-4 (Affymetrix & non-Affymetrix platform datasets)**

| Affymetrix platform cohorts |          |          |          |             |                |                    |
|-----------------------------|----------|----------|----------|-------------|----------------|--------------------|
| genes                       | betahat  | t.stats  | p.value  | adj.p.value | ebayes.p.value | adj.ebayes.p.value |
| AADAT                       | 0.460425 | 1.749325 | 0.081642 | 0.148671    | 0.079925       | 0.14628            |
| AAK1                        | 0.124787 | 1.114861 | 0.266138 | 0.376421    | 0.271394       | 0.381901           |
| AAMP                        | 0.192591 | 1.472882 | 0.142225 | 0.231184    | 0.14446        | 0.234368           |
| AARS                        | 0.238852 | 1.40345  | 0.161905 | 0.256561    | 0.161699       | 0.256186           |
| AATF                        | 0.504913 | 2.734459 | 0.006762 | 0.018533    | 0.006657       | 0.01834            |
| ABAT                        | 0.18244  | 0.487686 | 0.626263 | 0.722315    | 0.623656       | 0.719726           |
| ABCA1                       | 0.382357 | 2.360915 | 0.019112 | 0.044645    | 0.019153       | 0.044742           |
| ABCA3                       | -0.38372 | -1.73949 | 0.08336  | 0.150979    | 0.082103       | 0.14951            |
| ABCA4                       | 0.563245 | 5.399655 | 1.74E-07 | 2.01E-06    | 2.48E-07       | 2.75E-06           |
| ABCA5                       | -0.0436  | -0.24186 | 0.809114 | 0.8631      | 0.808848       | 0.86282            |
| ABCA6                       | 1.110834 | 4.703209 | 4.54E-06 | 3.60E-05    | 4.07E-06       | 3.25E-05           |
| ABCA8                       | -0.12899 | -0.65035 | 0.516151 | 0.628253    | 0.514974       | 0.627041           |
| ABCB10                      | 0.442528 | 1.828472 | 0.068845 | 0.13042     | 0.06747        | 0.128126           |
| ABCB6                       | 0.409117 | 2.976755 | 0.003242 | 0.010039    | 0.003367       | 0.010357           |
| ABCB7                       | 0.696655 | 4.218683 | 3.60E-05 | 0.000222    | 3.59E-05       | 0.000221           |
| ABCB8                       | -0.02682 | -0.24133 | 0.809528 | 0.863154    | 0.811632       | 0.864613           |
| ABCB9                       | 0.444697 | 3.660228 | 0.000316 | 0.001401    | 0.000351       | 0.001521           |
| ABCC10                      | -0.11267 | -0.55441 | 0.579866 | 0.68384     | 0.578686       | 0.682984           |
| ABCC2                       | -0.46548 | -1.59203 | 0.112826 | 0.1929      | 0.110547       | 0.189763           |
| ABCC5                       | 0.969541 | 3.178339 | 0.001696 | 0.005794    | 0.001579       | 0.005436           |
| ABCC8                       | 0.322875 | 2.675936 | 0.008018 | 0.021424    | 0.008531       | 0.02259            |
| ABCD1                       | 0.286616 | 2.610149 | 0.009678 | 0.02516     | 0.010541       | 0.027088           |
| ABCE1                       | 0.691625 | 4.826805 | 2.61E-06 | 2.17E-05    | 2.77E-06       | 2.29E-05           |
| ABCF1                       | 0.404466 | 2.89548  | 0.004171 | 0.012423    | 0.004308       | 0.01275            |
| ABCF2                       | 0.133768 | 1.074353 | 0.283852 | 0.394939    | 0.287291       | 0.399488           |
| ABCF3                       | 0.364588 | 2.450449 | 0.015056 | 0.036569    | 0.015271       | 0.036996           |
| ABCG2                       | 1.75165  | 3.877657 | 0.00014  | 0.000709    | 0.000123       | 0.000634           |
| ABHD2                       | 1.358056 | 4.90654  | 1.81E-06 | 1.58E-05    | 1.57E-06       | 1.40E-05           |
| ABHD4                       | 0.678357 | 6.427842 | 8.04E-10 | 1.75E-08    | 1.26E-09       | 2.56E-08           |
| ABHD5                       | 1.384842 | 7.067853 | 2.10E-11 | 7.20E-10    | 1.80E-11       | 6.47E-10           |
| ABHD6                       | 0.481776 | 2.190772 | 0.029528 | 0.063749    | 0.02887        | 0.062732           |
| ABI2                        | 0.554923 | 4.097374 | 5.89E-05 | 0.000337    | 6.32E-05       | 0.000356           |
| ABI3BP                      | -0.52276 | -2.18224 | 0.03016  | 0.064905    | 0.029358       | 0.06368            |
| ABL1                        | 0.465847 | 3.243775 | 0.001365 | 0.004823    | 0.001408       | 0.004959           |
| ABLIM1                      | 0.369301 | 1.490739 | 0.137475 | 0.225445    | 0.135447       | 0.22254            |
| ABLIM3                      | 0.819934 | 3.603693 | 0.000389 | 0.001664    | 0.000366       | 0.001578           |

|        |          |          |          |          |          |          |
|--------|----------|----------|----------|----------|----------|----------|
| ABP1   | -0.64683 | -1.20908 | 0.227942 | 0.334895 | 0.224005 | 0.331181 |
| ABR    | -0.05049 | -0.30893 | 0.757671 | 0.826998 | 0.757739 | 0.827029 |
| ABTB1  | -0.11239 | -1.02724 | 0.305447 | 0.419032 | 0.311213 | 0.425204 |
| ABTB2  | 0.250983 | 2.07202  | 0.03944  | 0.08123  | 0.041024 | 0.083975 |
| ACAA1  | 0.231285 | 1.445888 | 0.149645 | 0.24128  | 0.149916 | 0.241635 |
| ACAA2  | 0.572129 | 2.561279 | 0.011104 | 0.028225 | 0.010765 | 0.027538 |
| ACACA  | 0.09606  | 0.601601 | 0.548065 | 0.656448 | 0.548362 | 0.656074 |
| ACACB  | 1.002772 | 4.497698 | 1.12E-05 | 8.01E-05 | 1.02E-05 | 7.41E-05 |
| ACAD8  | 0.32328  | 1.591153 | 0.113024 | 0.193079 | 0.111896 | 0.19131  |
| ACAD9  | 0.711171 | 5.944549 | 1.09E-08 | 1.67E-07 | 1.39E-08 | 2.07E-07 |
| ACADM  | 1.407144 | 6.812597 | 9.21E-11 | 2.64E-09 | 7.80E-11 | 2.32E-09 |
| ACADS  | 0.313383 | 2.092207 | 0.037577 | 0.077941 | 0.037962 | 0.078738 |
| ACADSB | 0.638091 | 3.025783 | 0.002778 | 0.008804 | 0.00268  | 0.008538 |
| ACAT2  | -0.28233 | -1.16582 | 0.24496  | 0.354031 | 0.242616 | 0.3514   |
| ACBD3  | 0.772318 | 4.165782 | 4.47E-05 | 0.000267 | 4.31E-05 | 0.000259 |
| ACBD5  | -0.00016 | -0.00076 | 0.999395 | 0.999764 | 0.999393 | 0.999761 |
| ACCN2  | 0.949457 | 6.793643 | 1.03E-10 | 2.89E-09 | 1.15E-10 | 3.23E-09 |
| ACHE   | 1.194418 | 5.251008 | 3.59E-07 | 3.80E-06 | 3.16E-07 | 3.39E-06 |
| ACLY   | -0.69213 | -3.33981 | 0.000986 | 0.003649 | 0.000946 | 0.003506 |
| ACO1   | 0.625913 | 2.92597  | 0.003797 | 0.011438 | 0.003665 | 0.011093 |
| ACOX1  | 0.659602 | 2.969592 | 0.003316 | 0.010212 | 0.003185 | 0.009875 |
| ACOX2  | -0.40452 | -1.40242 | 0.162213 | 0.256874 | 0.159586 | 0.253568 |
| ACPI   | -0.47517 | -3.1666  | 0.001763 | 0.005979 | 0.001798 | 0.006091 |
| ACP5   | 0.244507 | 0.805092 | 0.421644 | 0.537214 | 0.418589 | 0.534031 |
| ACP6   | -1.00566 | -3.64972 | 0.000329 | 0.001449 | 0.000302 | 0.001345 |
| ACSL5  | 0.046338 | 0.137116 | 0.891066 | 0.922672 | 0.890294 | 0.921887 |
| ACTA2  | 0.008749 | 0.025341 | 0.979806 | 0.986946 | 0.97966  | 0.986799 |
| ACTG2  | 0.14739  | 0.702628 | 0.483037 | 0.595873 | 0.481505 | 0.594139 |
| ACTL6A | 1.413593 | 7.13846  | 1.39E-11 | 5.21E-10 | 1.18E-11 | 4.51E-10 |
| ACTN2  | -0.3314  | -1.27058 | 0.205232 | 0.309827 | 0.202707 | 0.30654  |
| ACTR1A | -0.0904  | -0.7539  | 0.451721 | 0.56667  | 0.455527 | 0.570167 |
| ACVR1  | 0.670992 | 4.940885 | 1.55E-06 | 1.39E-05 | 1.70E-06 | 1.52E-05 |
| ACVR1B | 0.084469 | 0.4954   | 0.620817 | 0.71709  | 0.620645 | 0.71742  |
| ACVRL1 | 0.329229 | 2.136924 | 0.033718 | 0.071129 | 0.033965 | 0.071649 |
| ACYP1  | -0.06077 | -0.28079 | 0.77914  | 0.84067  | 0.778311 | 0.840094 |
| ACYP2  | -0.08799 | -0.33449 | 0.738335 | 0.812306 | 0.736911 | 0.811556 |
| ADA    | 0.575318 | 1.622133 | 0.10622  | 0.183408 | 0.103672 | 0.179801 |
| ADAM10 | -0.679   | -3.59107 | 0.000407 | 0.001734 | 0.000394 | 0.001685 |
| ADAM11 | 0.115463 | 1.462021 | 0.145176 | 0.23496  | 0.157708 | 0.251519 |
| ADAM15 | 0.709963 | 4.632218 | 6.22E-06 | 4.73E-05 | 6.37E-06 | 4.87E-05 |
| ADAM17 | 0.274863 | 1.622301 | 0.106184 | 0.183408 | 0.106035 | 0.18329  |

|          |          |          |          |          |          |          |
|----------|----------|----------|----------|----------|----------|----------|
| ADAM19   | -0.16384 | -1.42644 | 0.155171 | 0.24857  | 0.159297 | 0.25328  |
| ADAM23   | 0.091435 | 0.450822 | 0.652566 | 0.744793 | 0.651563 | 0.743643 |
| ADAM8    | 0.170223 | 0.935023 | 0.350811 | 0.46603  | 0.350047 | 0.465804 |
| ADAMTS1  | 1.404115 | 5.287194 | 3.01E-07 | 3.26E-06 | 2.56E-07 | 2.83E-06 |
| ADAMTS13 | -0.02713 | -0.28311 | 0.777361 | 0.839763 | 0.781287 | 0.8426   |
| ADAMTS18 | -0.03432 | -0.24867 | 0.803849 | 0.858852 | 0.804643 | 0.8597   |
| ADAMTS2  | 0.52101  | 2.376969 | 0.01832  | 0.042967 | 0.017853 | 0.041996 |
| ADAMTS8  | -0.10704 | -0.35106 | 0.725883 | 0.803687 | 0.724144 | 0.801951 |
| ADAR     | 0.306204 | 2.797551 | 0.00561  | 0.015853 | 0.006184 | 0.017281 |
| ADARB1   | 0.270393 | 2.630604 | 0.009131 | 0.023966 | 0.010173 | 0.026272 |
| ADCY1    | 0.385997 | 3.094694 | 0.002228 | 0.007334 | 0.002387 | 0.007763 |
| ADCY2    | 0.37519  | 2.905941 | 0.004039 | 0.012088 | 0.004255 | 0.012642 |
| ADCY3    | 0.122565 | 0.772654 | 0.440564 | 0.556081 | 0.440962 | 0.55653  |
| ADCY9    | -0.3598  | -2.37028 | 0.018646 | 0.043644 | 0.018845 | 0.044044 |
| ADD1     | 0.275266 | 2.682378 | 0.00787  | 0.021089 | 0.008806 | 0.0232   |
| ADD3     | 0.866104 | 3.223035 | 0.001463 | 0.005115 | 0.001371 | 0.004852 |
| ADH1C    | 1.639788 | 2.77277  | 0.006039 | 0.016867 | 0.005614 | 0.015857 |
| ADH4     | -0.07399 | -0.18777 | 0.851231 | 0.891838 | 0.850093 | 0.891043 |
| ADH5     | 0.78218  | 5.777882 | 2.59E-08 | 3.65E-07 | 2.92E-08 | 4.07E-07 |
| ADH6     | -0.28248 | -0.67537 | 0.500154 | 0.612806 | 0.49676  | 0.608965 |
| ADK      | 1.586062 | 6.489131 | 5.72E-10 | 1.29E-08 | 4.62E-10 | 1.07E-08 |
| ADM      | -0.51073 | -1.35833 | 0.175761 | 0.274263 | 0.172508 | 0.269759 |
| ADPGK    | 0.194502 | 1.423347 | 0.156065 | 0.249492 | 0.157867 | 0.251601 |
| ADRA1B   | -0.4647  | -4.19323 | 4.00E-05 | 0.000244 | 4.83E-05 | 0.000284 |
| ADRA1D   | -0.62358 | -6.05842 | 5.97E-09 | 9.63E-08 | 9.30E-09 | 1.47E-07 |
| ADRBK2   | 0.926207 | 4.298038 | 2.60E-05 | 0.000165 | 2.41E-05 | 0.000155 |
| ADRM1    | -0.06391 | -0.42624 | 0.670353 | 0.759194 | 0.671    | 0.759406 |
| ADSL     | -0.09794 | -0.65243 | 0.514813 | 0.626845 | 0.515677 | 0.627572 |
| ADSS     | 0.221017 | 2.297614 | 0.022532 | 0.05126  | 0.025018 | 0.05578  |
| AEBP1    | -0.06581 | -0.33488 | 0.738037 | 0.812169 | 0.737361 | 0.811556 |
| AFG3L2   | 0.29772  | 1.590109 | 0.113259 | 0.193079 | 0.112526 | 0.192177 |
| AGA      | 0.518571 | 1.812434 | 0.071295 | 0.134249 | 0.069543 | 0.131319 |
| AGER     | 0.248938 | 2.736099 | 0.00673  | 0.018518 | 0.007946 | 0.021246 |
| AGGF1    | 0.717225 | 5.185285 | 4.92E-07 | 5.06E-06 | 5.36E-07 | 5.49E-06 |
| AGL      | 0.759922 | 4.324276 | 2.33E-05 | 0.000151 | 2.27E-05 | 0.000148 |
| AGMAT    | 0.159987 | 0.944168 | 0.346129 | 0.461636 | 0.345939 | 0.461776 |
| AGPAT1   | 0.156695 | 1.111646 | 0.267515 | 0.37795  | 0.269214 | 0.379425 |
| AGPAT2   | 0.243594 | 1.013115 | 0.312128 | 0.426016 | 0.309755 | 0.423582 |
| AGR2     | -1.73837 | -4.12636 | 5.25E-05 | 0.000306 | 4.57E-05 | 0.000272 |
| AGRN     | -0.05425 | -0.44601 | 0.656034 | 0.747134 | 0.658584 | 0.748753 |
| AGT      | 1.318589 | 2.621488 | 0.009371 | 0.024483 | 0.008792 | 0.023188 |

|         |          |          |          |          |          |          |
|---------|----------|----------|----------|----------|----------|----------|
| AGXT    | -0.25704 | -1.73603 | 0.083972 | 0.151912 | 0.084687 | 0.153561 |
| AHCY    | 0.518913 | 2.863029 | 0.004605 | 0.013512 | 0.004539 | 0.013332 |
| AHR     | 1.044403 | 5.086657 | 7.85E-07 | 7.83E-06 | 7.17E-07 | 7.20E-06 |
| AHSA1   | 0.071653 | 0.446539 | 0.655651 | 0.747134 | 0.655859 | 0.747101 |
| AIM1    | -0.63808 | -2.0179  | 0.044828 | 0.09058  | 0.043386 | 0.088121 |
| AIM2    | -1.23784 | -2.81423 | 0.005337 | 0.01522  | 0.004977 | 0.01435  |
| AIP     | 0.172152 | 1.056819 | 0.291764 | 0.404476 | 0.291924 | 0.404495 |
| AK2     | 0.667146 | 3.330534 | 0.001018 | 0.003742 | 0.000982 | 0.003628 |
| AKAP10  | -0.03717 | -0.23168 | 0.817006 | 0.868565 | 0.817123 | 0.86869  |
| AKAP12  | 0.272636 | 0.812548 | 0.417364 | 0.533046 | 0.414062 | 0.530126 |
| AKAP13  | 0.784539 | 4.918281 | 1.72E-06 | 1.51E-05 | 1.73E-06 | 1.54E-05 |
| AKAP6   | -0.12703 | -1.21822 | 0.224458 | 0.331641 | 0.230965 | 0.337857 |
| AKAP7   | 0.718324 | 3.394171 | 0.000818 | 0.003132 | 0.000781 | 0.003028 |
| AKAP8   | 0.385548 | 3.477158 | 0.000612 | 0.002475 | 0.000701 | 0.002774 |
| AKAP8L  | 0.205522 | 1.783031 | 0.075973 | 0.141105 | 0.078864 | 0.145054 |
| AKAP9   | -1.52718 | -3.62108 | 0.000365 | 0.001581 | 0.000327 | 0.001438 |
| AKR1A1  | 0.620395 | 6.346919 | 1.26E-09 | 2.55E-08 | 2.21E-09 | 4.20E-08 |
| AKR1B1  | -0.02538 | -0.10305 | 0.918017 | 0.943512 | 0.917599 | 0.943082 |
| AKR1B10 | -0.8173  | -1.49059 | 0.137515 | 0.225445 | 0.134178 | 0.221043 |
| AKR1C3  | -1.88444 | -4.06517 | 6.70E-05 | 0.000377 | 5.83E-05 | 0.000333 |
| AKR7A2  | 0.051627 | 0.272001 | 0.785879 | 0.845999 | 0.78542  | 0.845892 |
| AKT1S1  | 0.668215 | 3.5557   | 0.000462 | 0.001938 | 0.000449 | 0.001892 |
| AKT2    | 0.279294 | 2.137248 | 0.033692 | 0.071105 | 0.034682 | 0.072818 |
| AKT3    | 0.207262 | 1.280927 | 0.20158  | 0.306017 | 0.201784 | 0.306003 |
| ALAD    | 0.752727 | 4.655561 | 5.61E-06 | 4.32E-05 | 5.62E-06 | 4.35E-05 |
| ALAS1   | -0.15274 | -0.7609  | 0.447542 | 0.562419 | 0.446197 | 0.561029 |
| ALAS2   | 0.363951 | 3.763631 | 0.000215 | 0.00101  | 0.000275 | 0.001244 |
| ALCAM   | 0.075905 | 0.207023 | 0.836185 | 0.881182 | 0.834977 | 0.880414 |
| ALDH1A1 | 1.807157 | 3.66719  | 0.000308 | 0.001369 | 0.000274 | 0.001243 |
| ALDH1A2 | 0.441551 | 1.851052 | 0.065515 | 0.125018 | 0.064213 | 0.12294  |
| ALDH1B1 | 0.516574 | 2.216705 | 0.027676 | 0.060615 | 0.026958 | 0.059377 |
| ALDH3A1 | 0.203013 | 0.473079 | 0.63663  | 0.731938 | 0.633933 | 0.729193 |
| ALDH3B2 | -0.26732 | -1.36371 | 0.174066 | 0.27234  | 0.172919 | 0.270275 |
| ALDH5A1 | 1.027913 | 3.354886 | 0.000936 | 0.003496 | 0.000865 | 0.003267 |
| ALDH9A1 | 1.151659 | 7.636094 | 6.96E-13 | 3.44E-11 | 7.23E-13 | 3.58E-11 |
| ALDOA   | -0.05856 | -0.38107 | 0.703526 | 0.785627 | 0.703963 | 0.78577  |
| ALDOB   | -0.76599 | -2.55182 | 0.011401 | 0.028823 | 0.010872 | 0.027742 |
| ALDOC   | 0.348918 | 1.258453 | 0.209574 | 0.314897 | 0.206837 | 0.311282 |
| ALG2    | -0.00094 | -0.00971 | 0.992264 | 0.995654 | 0.992399 | 0.995689 |
| ALG3    | 0.413773 | 2.472743 | 0.014173 | 0.034712 | 0.014146 | 0.034647 |
| ALG8    | 0.607445 | 2.73132  | 0.006825 | 0.01866  | 0.006593 | 0.018217 |

|          |          |          |          |          |          |          |
|----------|----------|----------|----------|----------|----------|----------|
| ALOX12P2 | 0.443477 | 3.12053  | 0.002049 | 0.006817 | 0.002116 | 0.007014 |
| ALOX5    | -0.97261 | -3.75485 | 0.000223 | 0.001039 | 0.000205 | 0.000968 |
| ALOX5AP  | -0.31139 | -1.14961 | 0.251564 | 0.360803 | 0.248791 | 0.357917 |
| ALPK1    | 0.074298 | 0.53973  | 0.589934 | 0.692307 | 0.591493 | 0.693635 |
| ALPL     | 0.497525 | 2.808595 | 0.005428 | 0.015432 | 0.005368 | 0.015292 |
| AMACR    | 0.319513 | 1.977652 | 0.049228 | 0.098121 | 0.049325 | 0.098316 |
| AMD1     | 0.304492 | 2.146529 | 0.032935 | 0.069791 | 0.033515 | 0.070764 |
| AMFR     | -0.21566 | -0.50194 | 0.616216 | 0.713228 | 0.613393 | 0.710786 |
| AMHR2    | 0.53351  | 4.880606 | 2.04E-06 | 1.76E-05 | 2.63E-06 | 2.19E-05 |
| AMN      | -0.15709 | -0.89145 | 0.373673 | 0.490302 | 0.373164 | 0.489361 |
| AMPD1    | 0.287883 | 0.879138 | 0.380294 | 0.497324 | 0.376973 | 0.493256 |
| AMPD2    | 0.638802 | 4.335697 | 2.22E-05 | 0.000145 | 2.31E-05 | 0.00015  |
| AMPD3    | -0.4538  | -3.47168 | 0.000624 | 0.002518 | 0.000666 | 0.002667 |
| AMPH     | 1.179087 | 4.692598 | 4.76E-06 | 3.75E-05 | 4.22E-06 | 3.36E-05 |
| AMT      | 0.374496 | 1.443916 | 0.150198 | 0.241923 | 0.147945 | 0.238949 |
| ANAPC10  | 0.335512 | 2.871179 | 0.004493 | 0.013246 | 0.004866 | 0.014101 |
| ANGPT2   | 0.286579 | 1.143866 | 0.253934 | 0.362652 | 0.251438 | 0.360127 |
| ANGPTL4  | 0.852469 | 3.658584 | 0.000318 | 0.001406 | 0.000298 | 0.00133  |
| ANK1     | 0.414995 | 2.602495 | 0.00989  | 0.025638 | 0.009936 | 0.02573  |
| ANK2     | 0.300122 | 2.28498  | 0.023276 | 0.052569 | 0.024023 | 0.054003 |
| ANK3     | 0.815492 | 3.124884 | 0.002021 | 0.006731 | 0.001905 | 0.006404 |
| ANKH     | 0.425069 | 2.034019 | 0.043161 | 0.087589 | 0.042434 | 0.086337 |
| ANKHD1   | 0.431455 | 3.85535  | 0.000152 | 0.00076  | 0.000178 | 0.000866 |
| ANKRD1   | 0.333906 | 1.486134 | 0.138689 | 0.226804 | 0.137007 | 0.224681 |
| ANKRD10  | 1.205045 | 4.430675 | 1.49E-05 | 0.000102 | 1.32E-05 | 9.25E-05 |
| ANKRD11  | 0.447359 | 3.237269 | 0.001395 | 0.004911 | 0.001455 | 0.00511  |
| ANKRD12  | 0.407595 | 2.409959 | 0.016784 | 0.039963 | 0.016734 | 0.039884 |
| ANKRD16  | 0.229175 | 1.239041 | 0.216663 | 0.322473 | 0.215817 | 0.321404 |
| ANKRD26  | 0.446096 | 3.30879  | 0.001096 | 0.003984 | 0.001153 | 0.004151 |
| ANKRD5   | 0.125719 | 0.641929 | 0.521594 | 0.632922 | 0.520496 | 0.631474 |
| ANLN     | 0.349713 | 1.1502   | 0.251322 | 0.360675 | 0.248205 | 0.357403 |
| ANP32B   | 0.551022 | 5.126738 | 6.49E-07 | 6.54E-06 | 8.71E-07 | 8.62E-06 |
| ANXA1    | 1.00425  | 3.026343 | 0.002773 | 0.0088   | 0.002586 | 0.00828  |
| ANXA10   | -0.68024 | -1.14131 | 0.254993 | 0.364046 | 0.250884 | 0.359853 |
| ANXA11   | 1.112267 | 6.238966 | 2.26E-09 | 4.29E-08 | 2.11E-09 | 4.05E-08 |
| ANXA13   | -1.31651 | -2.24458 | 0.025799 | 0.057136 | 0.02454  | 0.05487  |
| ANXA4    | 0.428545 | 1.685834 | 0.093258 | 0.166343 | 0.091502 | 0.16352  |
| ANXA5    | 0.701699 | 4.3066   | 2.51E-05 | 0.000161 | 2.51E-05 | 0.00016  |
| ANXA6    | -0.94061 | -5.19107 | 4.78E-07 | 4.94E-06 | 4.54E-07 | 4.74E-06 |
| ANXA7    | 0.504978 | 3.026858 | 0.002768 | 0.008792 | 0.002761 | 0.008762 |
| AOAH     | -0.91049 | -4.21882 | 3.60E-05 | 0.000222 | 3.35E-05 | 0.000208 |

|          |          |          |          |          |          |          |
|----------|----------|----------|----------|----------|----------|----------|
| AOC2     | 1.459906 | 10.83529 | 3.64E-22 | 1.43E-19 | 4.47E-22 | 1.75E-19 |
| AOC3     | 1.305332 | 6.05076  | 6.21E-09 | 1.00E-07 | 5.36E-09 | 8.88E-08 |
| AP1B1    | -0.13714 | -1.21526 | 0.225581 | 0.332455 | 0.230533 | 0.337435 |
| APIG1    | 0.655139 | 3.778769 | 0.000203 | 0.000965 | 0.0002   | 0.000949 |
| AP1M2    | 0.225253 | 1.18346  | 0.237916 | 0.345838 | 0.236858 | 0.345155 |
| AP1S2    | -0.06423 | -0.25365 | 0.800001 | 0.856298 | 0.798954 | 0.855957 |
| AP2A2    | 0.222953 | 1.639131 | 0.102628 | 0.178715 | 0.104163 | 0.180452 |
| AP2B1    | 0.207955 | 1.037728 | 0.300546 | 0.413515 | 0.299123 | 0.411557 |
| AP2S1    | -0.13015 | -0.94322 | 0.346614 | 0.462152 | 0.348599 | 0.464403 |
| AP3B1    | -0.04599 | -0.42211 | 0.673362 | 0.761136 | 0.677078 | 0.763499 |
| AP3B2    | -0.37675 | -2.73177 | 0.006816 | 0.018656 | 0.007037 | 0.019228 |
| AP3D1    | 1.296923 | 7.043078 | 2.43E-11 | 8.14E-10 | 2.17E-11 | 7.38E-10 |
| AP3M1    | 0.246375 | 1.429123 | 0.1544   | 0.247588 | 0.154104 | 0.246971 |
| AP3S2    | 0.835727 | 3.80952  | 0.000181 | 0.000876 | 0.00017  | 0.000833 |
| AP4B1    | 0.425199 | 3.115209 | 0.002085 | 0.006911 | 0.002176 | 0.007187 |
| AP4E1    | -0.0154  | -0.19526 | 0.845373 | 0.887853 | 0.850028 | 0.891043 |
| AP4M1    | -0.28795 | -1.54176 | 0.124583 | 0.208525 | 0.123831 | 0.20734  |
| AP4S1    | 0.432733 | 3.247688 | 0.001347 | 0.004768 | 0.00142  | 0.004997 |
| APBA3    | 0.035534 | 0.263411 | 0.792483 | 0.85033  | 0.793445 | 0.85122  |
| APBB1    | -0.27142 | -1.81373 | 0.071095 | 0.13398  | 0.071677 | 0.134698 |
| APBB1IP  | 0.720784 | 3.996869 | 8.78E-05 | 0.000475 | 8.54E-05 | 0.000463 |
| APBB2    | 1.010333 | 4.536928 | 9.43E-06 | 6.85E-05 | 8.61E-06 | 6.32E-05 |
| APC      | 0.618218 | 4.299442 | 2.58E-05 | 0.000165 | 2.71E-05 | 0.000172 |
| APC2     | -0.1059  | -1.30533 | 0.193158 | 0.296293 | 0.20604  | 0.310441 |
| APEH     | 0.540354 | 4.638394 | 6.05E-06 | 4.63E-05 | 7.27E-06 | 5.45E-05 |
| APEX1    | -0.20805 | -1.50826 | 0.132937 | 0.219846 | 0.134524 | 0.221399 |
| APEX2    | 0.4342   | 3.273175 | 0.001237 | 0.00442  | 0.001307 | 0.004642 |
| API5     | 0.047675 | 0.269541 | 0.787769 | 0.846869 | 0.787538 | 0.847009 |
| APLP1    | 0.101211 | 0.473448 | 0.636367 | 0.731814 | 0.635113 | 0.730373 |
| APLP2    | -0.08478 | -0.38103 | 0.703554 | 0.785627 | 0.702382 | 0.784691 |
| APOBEC1  | -1.13441 | -2.9019  | 0.00409  | 0.012204 | 0.003811 | 0.011482 |
| APOBEC3B | 0.021463 | 0.036954 | 0.970555 | 0.980281 | 0.970301 | 0.980102 |
| APOBEC3C | 1.272963 | 6.904375 | 5.43E-11 | 1.67E-09 | 4.87E-11 | 1.52E-09 |
| APOBEC3F | -0.07695 | -0.72964 | 0.466394 | 0.5816   | 0.472407 | 0.586453 |
| APOC1    | 0.517649 | 1.891469 | 0.059888 | 0.116023 | 0.058379 | 0.113428 |
| APOC2    | 0.82795  | 6.88734  | 5.99E-11 | 1.79E-09 | 8.04E-11 | 2.38E-09 |
| APP      | 0.220836 | 0.90964  | 0.364017 | 0.48018  | 0.361624 | 0.477424 |
| APPBP2   | 1.078117 | 6.466498 | 6.49E-10 | 1.45E-08 | 6.28E-10 | 1.39E-08 |
| APRT     | -0.18059 | -1.08653 | 0.278444 | 0.389607 | 0.278421 | 0.389458 |
| APTX     | 0.951818 | 5.740862 | 3.13E-08 | 4.33E-07 | 3.08E-08 | 4.26E-07 |
| AQP2     | 0.239978 | 1.024719 | 0.306632 | 0.420288 | 0.304377 | 0.417807 |

|          |          |          |          |          |          |          |
|----------|----------|----------|----------|----------|----------|----------|
| AQP5     | -0.57926 | -1.48691 | 0.138482 | 0.226546 | 0.135466 | 0.22254  |
| AQP7     | 1.215776 | 7.133437 | 1.43E-11 | 5.32E-10 | 1.34E-11 | 5.08E-10 |
| AQP9     | 1.205536 | 3.845532 | 0.000158 | 0.000783 | 0.000142 | 0.000718 |
| AR       | 1.1591   | 6.395684 | 9.60E-10 | 2.02E-08 | 8.85E-10 | 1.88E-08 |
| ARF1     | 0.233262 | 1.60146  | 0.110723 | 0.189947 | 0.111689 | 0.191095 |
| ARF3     | 0.065118 | 0.349674 | 0.726921 | 0.804079 | 0.726418 | 0.803333 |
| ARF5     | -0.14479 | -1.07618 | 0.283038 | 0.394273 | 0.285349 | 0.397257 |
| ARFGAP3  | -0.11525 | -0.63683 | 0.524902 | 0.635507 | 0.524286 | 0.634925 |
| ARFGEF2  | 0.38318  | 2.259882 | 0.024817 | 0.05538  | 0.024746 | 0.055306 |
| ARFIP1   | 0.237597 | 1.489205 | 0.137879 | 0.225716 | 0.138161 | 0.22602  |
| ARFRP1   | 0.521973 | 3.722604 | 0.000251 | 0.001153 | 0.000263 | 0.0012   |
| ARHGAP1  | 0.178058 | 1.590821 | 0.113099 | 0.193079 | 0.117067 | 0.198337 |
| ARHGAP15 | 0.402975 | 2.302868 | 0.022229 | 0.050668 | 0.022092 | 0.050428 |
| ARHGAP25 | -0.02406 | -0.18903 | 0.850249 | 0.891206 | 0.851204 | 0.892009 |
| ARHGAP26 | -0.44873 | -2.26553 | 0.024462 | 0.054749 | 0.024057 | 0.054048 |
| ARHGAP6  | 1.394905 | 6.342916 | 1.28E-09 | 2.60E-08 | 1.08E-09 | 2.24E-08 |
| ARHGDI A | 0.180662 | 1.167639 | 0.244228 | 0.353305 | 0.244874 | 0.35369  |
| ARHGDI B | -1.00531 | -6.29621 | 1.66E-09 | 3.24E-08 | 1.65E-09 | 3.28E-08 |
| ARHGEF1  | -0.16616 | -1.7086  | 0.088948 | 0.159503 | 0.094571 | 0.167983 |
| ARHGEF11 | -0.4036  | -2.7751  | 0.005998 | 0.016789 | 0.00613  | 0.017159 |
| ARHGEF16 | -0.13706 | -0.8469  | 0.397978 | 0.514296 | 0.398199 | 0.514865 |
| ARHGEF5  | 0.244809 | 1.356566 | 0.176322 | 0.274955 | 0.175688 | 0.273967 |
| ARHGEF6  | 0.070943 | 0.521677 | 0.602425 | 0.701996 | 0.604066 | 0.703621 |
| ARHGEF7  | 0.632806 | 3.373144 | 0.000879 | 0.003325 | 0.000856 | 0.003238 |
| ARID1A   | -0.12298 | -0.59735 | 0.550892 | 0.658158 | 0.549588 | 0.6566   |
| ARID1B   | 0.33835  | 1.929075 | 0.05502  | 0.108062 | 0.054767 | 0.107836 |
| ARID3A   | 1.614116 | 6.396688 | 9.55E-10 | 2.02E-08 | 7.68E-10 | 1.66E-08 |
| ARID4A   | 0.654256 | 5.14908  | 5.84E-07 | 5.92E-06 | 6.76E-07 | 6.80E-06 |
| ARID4B   | 0.612421 | 5.593117 | 6.64E-08 | 8.51E-07 | 9.11E-08 | 1.12E-06 |
| ARIH1    | 0.591635 | 4.614113 | 6.73E-06 | 5.07E-05 | 7.57E-06 | 5.64E-05 |
| ARIH2    | -0.11507 | -0.8489  | 0.396869 | 0.513287 | 0.399041 | 0.51567  |
| ARL1     | 0.080863 | 0.53032  | 0.59643  | 0.696971 | 0.597058 | 0.697264 |
| ARL2BP   | 0.093449 | 0.870293 | 0.385097 | 0.502235 | 0.391138 | 0.50699  |
| ARL3     | 0.721149 | 7.141127 | 1.36E-11 | 5.17E-10 | 2.50E-11 | 8.47E-10 |
| ARL4A    | 0.303745 | 1.420057 | 0.15702  | 0.250762 | 0.155471 | 0.248627 |
| ARL6IP5  | 0.589394 | 3.433589 | 0.000713 | 0.002829 | 0.000706 | 0.002787 |
| ARMC8    | 0.111686 | 0.529252 | 0.597169 | 0.697496 | 0.595861 | 0.696827 |
| ARMCX3   | 2.052961 | 7.867406 | 1.67E-13 | 1.01E-11 | 1.19E-13 | 7.80E-12 |
| ARNTL    | 0.937808 | 3.458336 | 0.000654 | 0.002614 | 0.000607 | 0.002454 |
| ARPC1A   | 0.243767 | 1.162186 | 0.246431 | 0.355502 | 0.244775 | 0.353656 |
| ARPC1B   | 0.393681 | 1.870964 | 0.06269  | 0.120607 | 0.061756 | 0.118887 |

|         |          |          |          |          |          |          |
|---------|----------|----------|----------|----------|----------|----------|
| ARPC2   | 0.674975 | 6.602881 | 3.03E-10 | 7.42E-09 | 5.09E-10 | 1.17E-08 |
| ARPC3   | 0.334475 | 2.761672 | 0.006241 | 0.017378 | 0.006657 | 0.01834  |
| ARPC4   | 0.275889 | 1.379801 | 0.169061 | 0.266194 | 0.167815 | 0.264497 |
| ARPC5   | -0.69533 | -5.08264 | 8.00E-07 | 7.96E-06 | 8.77E-07 | 8.66E-06 |
| ARPC5L  | -0.68969 | -4.64362 | 5.92E-06 | 4.55E-05 | 6.15E-06 | 4.72E-05 |
| ARRB1   | 0.954796 | 4.567238 | 8.26E-06 | 6.07E-05 | 7.65E-06 | 5.69E-05 |
| ARRDC2  | 0.240575 | 1.665222 | 0.097305 | 0.172059 | 0.098276 | 0.173124 |
| ARSA    | 0.418467 | 1.988877 | 0.047965 | 0.095849 | 0.047171 | 0.094542 |
| ARSB    | 1.38009  | 8.792767 | 4.45E-16 | 5.82E-14 | 4.36E-16 | 5.61E-14 |
| ARSD    | 0.600514 | 2.479843 | 0.013901 | 0.034201 | 0.013429 | 0.033255 |
| ARSE    | 0.09129  | 0.215898 | 0.829269 | 0.87783  | 0.82793  | 0.876808 |
| ARVCF   | 0.575516 | 5.54713  | 8.37E-08 | 1.04E-06 | 1.22E-07 | 1.45E-06 |
| ASAH1   | 0.30494  | 1.617736 | 0.107166 | 0.184836 | 0.106417 | 0.183814 |
| ASAM    | 0.722746 | 2.791998 | 0.005704 | 0.016043 | 0.005439 | 0.015456 |
| ASCC3   | 0.295641 | 1.717138 | 0.087374 | 0.1571   | 0.087148 | 0.157054 |
| ASGR1   | 0.710933 | 2.943679 | 0.003595 | 0.010914 | 0.00343  | 0.010515 |
| ASGR2   | 1.4295   | 5.330316 | 2.44E-07 | 2.70E-06 | 2.07E-07 | 2.35E-06 |
| ASH2L   | 0.038218 | 0.24163  | 0.809294 | 0.8631   | 0.80947  | 0.863273 |
| ASL     | 0.627044 | 2.747893 | 0.0065   | 0.018035 | 0.006264 | 0.017478 |
| ASMTL   | -1.01567 | -4.87245 | 2.12E-06 | 1.81E-05 | 1.94E-06 | 1.70E-05 |
| ASNS    | -0.59748 | -2.48121 | 0.01385  | 0.034098 | 0.013384 | 0.033159 |
| ASPA    | 0.719887 | 3.530594 | 0.000506 | 0.002091 | 0.000484 | 0.002019 |
| ASXL1   | 0.485991 | 3.089239 | 0.002268 | 0.007438 | 0.002287 | 0.007496 |
| ASXL2   | -0.50361 | -2.38094 | 0.018129 | 0.042625 | 0.01771  | 0.041722 |
| ATAD3B  | 0.932012 | 8.974888 | 1.34E-16 | 1.97E-14 | 2.84E-16 | 4.17E-14 |
| ATE1    | 0.762912 | 4.485589 | 1.18E-05 | 8.35E-05 | 1.16E-05 | 8.30E-05 |
| ATF1    | 0.40334  | 2.425267 | 0.016111 | 0.038654 | 0.016094 | 0.038594 |
| ATF2    | 0.391713 | 2.056376 | 0.040937 | 0.083837 | 0.040472 | 0.083138 |
| ATF4    | 0.056631 | 0.349315 | 0.72719  | 0.804187 | 0.727307 | 0.803938 |
| ATF5    | 0.038622 | 0.339405 | 0.734631 | 0.810128 | 0.73727  | 0.811556 |
| ATF6    | 0.68298  | 4.675006 | 5.15E-06 | 4.02E-05 | 5.39E-06 | 4.19E-05 |
| ATF7IP2 | 1.277042 | 4.31999  | 2.37E-05 | 0.000153 | 2.10E-05 | 0.000138 |
| ATIC    | 0.153961 | 0.93539  | 0.350622 | 0.46603  | 0.35069  | 0.466336 |
| ATM     | 0.969093 | 6.128385 | 4.11E-09 | 7.07E-08 | 4.13E-09 | 7.14E-08 |
| ATOX1   | 0.625833 | 4.34244  | 2.16E-05 | 0.000141 | 2.26E-05 | 0.000147 |
| ATP11C  | 0.92079  | 5.706067 | 3.75E-08 | 5.06E-07 | 3.73E-08 | 5.08E-07 |
| ATP13A2 | -0.57921 | -3.41206 | 0.000768 | 0.002977 | 0.000762 | 0.002964 |
| ATP1A1  | -0.21635 | -0.86289 | 0.389144 | 0.505521 | 0.386647 | 0.503252 |
| ATP1A2  | 1.21609  | 4.408412 | 1.63E-05 | 0.000111 | 1.45E-05 | 0.000101 |
| ATP1B1  | -0.06157 | -0.22068 | 0.825546 | 0.874874 | 0.824505 | 0.87377  |
| ATP1B3  | 0.20291  | 1.440457 | 0.151173 | 0.243239 | 0.152624 | 0.245308 |



|          |          |          |          |          |          |          |
|----------|----------|----------|----------|----------|----------|----------|
| ATP2A2   | 0.047704 | 0.379286 | 0.704845 | 0.786396 | 0.706766 | 0.787904 |
| ATP2A3   | -1.06717 | -3.95047 | 0.000105 | 0.000554 | 9.58E-05 | 0.000512 |
| ATP2B4   | 0.696408 | 3.187441 | 0.001646 | 0.005668 | 0.001575 | 0.005428 |
| ATP5B    | -0.00182 | -0.01189 | 0.990522 | 0.99433  | 0.990537 | 0.994345 |
| ATP5C1   | -0.48568 | -3.13098 | 0.001981 | 0.006631 | 0.002004 | 0.00669  |
| ATP5D    | 0.034396 | 0.244175 | 0.807325 | 0.861587 | 0.808004 | 0.862115 |
| ATP5F1   | 0.797106 | 6.198887 | 2.81E-09 | 5.24E-08 | 3.36E-09 | 6.04E-08 |
| ATP5G1   | 0.211723 | 1.162888 | 0.246146 | 0.355225 | 0.245392 | 0.354113 |
| ATP5G2   | 0.416284 | 4.450733 | 1.37E-05 | 9.52E-05 | 1.95E-05 | 0.00013  |
| ATP5H    | 0.052099 | 0.45819  | 0.647273 | 0.74056  | 0.65068  | 0.743525 |
| ATP5I    | -0.17756 | -1.18799 | 0.23613  | 0.344127 | 0.237129 | 0.345155 |
| ATP5J    | -0.05218 | -0.33607 | 0.737145 | 0.811948 | 0.73748  | 0.811556 |
| ATP5J2   | 0.247252 | 1.657179 | 0.098922 | 0.174001 | 0.099644 | 0.174879 |
| ATP5O    | -0.11136 | -0.9814  | 0.327485 | 0.442166 | 0.33254  | 0.44732  |
| ATP6V0A1 | 0.491201 | 3.835832 | 0.000164 | 0.000805 | 0.000179 | 0.000869 |
| ATP6V0A2 | 0.164078 | 1.550526 | 0.122466 | 0.205429 | 0.127479 | 0.212314 |
| ATP6V0B  | 0.093067 | 0.607521 | 0.544137 | 0.65253  | 0.544785 | 0.653519 |
| ATP6V0C  | 0.162762 | 1.18034  | 0.239151 | 0.347346 | 0.241088 | 0.349726 |
| ATP6V0D1 | 0.064694 | 0.42703  | 0.669779 | 0.75891  | 0.670355 | 0.75917  |
| ATP6V1A  | 0.40377  | 2.476133 | 0.014043 | 0.034501 | 0.014062 | 0.034549 |
| ATP6V1B2 | -0.18266 | -1.02027 | 0.308733 | 0.422302 | 0.308091 | 0.422043 |
| ATP6V1C1 | 0.565997 | 3.4231   | 0.000739 | 0.002898 | 0.000738 | 0.002888 |
| ATP6V1F  | -0.23965 | -1.733   | 0.08451  | 0.152651 | 0.085757 | 0.155022 |
| ATP6V1G1 | 0.409627 | 2.293241 | 0.022787 | 0.05169  | 0.022602 | 0.051393 |
| ATP7A    | 1.451244 | 5.772085 | 2.67E-08 | 3.75E-07 | 2.23E-08 | 3.19E-07 |
| ATP7B    | -0.31016 | -0.76863 | 0.442947 | 0.558436 | 0.439387 | 0.554841 |
| ATP8A1   | 0.415298 | 1.885285 | 0.060721 | 0.1173   | 0.059675 | 0.115516 |
| ATP8A2   | 0.232998 | 1.468021 | 0.14354  | 0.232714 | 0.143869 | 0.23357  |
| ATP8B1   | 0.97195  | 4.446396 | 1.39E-05 | 9.66E-05 | 1.28E-05 | 9.03E-05 |
| ATP9A    | -0.03547 | -0.18531 | 0.853161 | 0.893461 | 0.852825 | 0.893309 |
| ATP9B    | 0.072743 | 0.734605 | 0.463369 | 0.578289 | 0.470734 | 0.585207 |
| ATPIF1   | 0.069801 | 0.465271 | 0.642202 | 0.736721 | 0.642892 | 0.737334 |
| ATR      | 0.084759 | 0.485595 | 0.627742 | 0.723489 | 0.627434 | 0.723134 |
| ATRN     | 0.841458 | 4.066194 | 6.68E-05 | 0.000376 | 6.29E-05 | 0.000354 |
| ATXN2    | 0.607839 | 4.369708 | 1.92E-05 | 0.000128 | 2.05E-05 | 0.000136 |
| ATXN2L   | -0.30987 | -3.08968 | 0.002265 | 0.007438 | 0.002643 | 0.008439 |
| ATXN3    | 0.494041 | 2.409561 | 0.016802 | 0.039985 | 0.016444 | 0.039253 |
| AUH      | 1.170962 | 6.124295 | 4.20E-09 | 7.20E-08 | 3.80E-09 | 6.72E-08 |
| AURKB    | 0.313453 | 2.19387  | 0.029301 | 0.063492 | 0.029807 | 0.064263 |
| AURKC    | 0.473202 | 1.855135 | 0.064927 | 0.124199 | 0.063482 | 0.121733 |
| AXIN1    | 0.566151 | 4.191445 | 4.03E-05 | 0.000245 | 4.34E-05 | 0.000261 |

|         |          |          |          |          |          |          |
|---------|----------|----------|----------|----------|----------|----------|
| AXIN2   | 0.092845 | 0.669573 | 0.503839 | 0.616398 | 0.505543 | 0.617959 |
| AXL     | 0.982356 | 6.544824 | 4.20E-10 | 9.76E-09 | 4.39E-10 | 1.02E-08 |
| AZGP1   | -1.34395 | -2.28767 | 0.023116 | 0.052308 | 0.02195  | 0.050128 |
| AZI2    | 1.536361 | 9.928381 | 2.10E-19 | 4.93E-17 | 2.03E-19 | 4.78E-17 |
| B2M     | 0.508004 | 4.104746 | 5.72E-05 | 0.00033  | 6.42E-05 | 0.000359 |
| B3GALT6 | 0.490456 | 2.537838 | 0.011852 | 0.029771 | 0.011638 | 0.029346 |
| B4GALT1 | 0.120109 | 0.633766 | 0.526898 | 0.637029 | 0.525997 | 0.636342 |
| B4GALT3 | -0.21765 | -2.3179  | 0.021382 | 0.049021 | 0.023962 | 0.053911 |
| B4GALT4 | 0.065621 | 0.300192 | 0.764317 | 0.831587 | 0.76341  | 0.830725 |
| B4GALT5 | 0.495581 | 2.163235 | 0.031611 | 0.067322 | 0.030852 | 0.066092 |
| B4GALT7 | 0.138149 | 1.050147 | 0.294813 | 0.408016 | 0.297442 | 0.409844 |
| BACE2   | -0.21103 | -0.7036  | 0.482434 | 0.595285 | 0.479583 | 0.592545 |
| BACH1   | 0.946801 | 9.387567 | 8.44E-18 | 1.42E-15 | 2.04E-17 | 3.51E-15 |
| BACH2   | -0.30496 | -1.21688 | 0.224965 | 0.33211  | 0.222527 | 0.329203 |
| BAD     | 0.042557 | 0.282557 | 0.777785 | 0.839763 | 0.778215 | 0.840094 |
| BAG1    | 0.303158 | 1.327933 | 0.185589 | 0.286836 | 0.183646 | 0.284384 |
| BAG3    | 0.131228 | 0.631847 | 0.528149 | 0.638124 | 0.526754 | 0.636439 |
| BAG4    | 0.613966 | 2.81175  | 0.005377 | 0.015297 | 0.005193 | 0.014882 |
| BAG5    | 1.460932 | 6.168453 | 3.31E-09 | 5.94E-08 | 2.75E-09 | 5.07E-08 |
| BAI1    | 0.275559 | 2.44638  | 0.015222 | 0.036916 | 0.016321 | 0.039005 |
| BAI2    | 0.445403 | 3.229508 | 0.001432 | 0.005021 | 0.001493 | 0.00522  |
| BAIAP2  | -0.71899 | -3.78764 | 0.000197 | 0.000939 | 0.00019  | 0.000911 |
| BAK1    | -0.24218 | -1.31226 | 0.190813 | 0.293675 | 0.190011 | 0.292228 |
| BAMBI   | -2.70301 | -5.21497 | 4.27E-07 | 4.45E-06 | 3.40E-07 | 3.61E-06 |
| BANF1   | -0.32685 | -2.15637 | 0.03215  | 0.068434 | 0.032449 | 0.068916 |
| BAP1    | 0.285928 | 2.362799 | 0.019017 | 0.044446 | 0.019982 | 0.046283 |
| BARD1   | 0.551534 | 2.559499 | 0.011159 | 0.028349 | 0.010849 | 0.027696 |
| BASP1   | 0.874785 | 3.191018 | 0.001627 | 0.005611 | 0.001524 | 0.005302 |
| BAT2    | 0.446808 | 3.211392 | 0.001521 | 0.00529  | 0.001582 | 0.005442 |
| BAT3    | -0.02866 | -0.21491 | 0.830042 | 0.87845  | 0.830891 | 0.878796 |
| BAT4    | 0.323034 | 2.251023 | 0.025382 | 0.056457 | 0.025823 | 0.057304 |
| BATF    | -0.77351 | -4.01218 | 8.27E-05 | 0.000452 | 7.92E-05 | 0.000434 |
| BAX     | 0.305097 | 1.093378 | 0.275434 | 0.386661 | 0.272528 | 0.383153 |
| BAZ1A   | 0.712432 | 3.929657 | 0.000114 | 0.000594 | 0.000111 | 0.000581 |
| BAZ2A   | 0.226559 | 2.106773 | 0.036281 | 0.075685 | 0.03866  | 0.079834 |
| BAZ2B   | 0.17924  | 1.868941 | 0.062972 | 0.120952 | 0.067823 | 0.128691 |
| BBX     | 0.987922 | 6.17397  | 3.21E-09 | 5.81E-08 | 3.21E-09 | 5.82E-08 |
| BCAP29  | 0.789294 | 4.86798  | 2.16E-06 | 1.84E-05 | 2.16E-06 | 1.86E-05 |
| BCAR1   | 0.072701 | 0.713846 | 0.476086 | 0.589641 | 0.482745 | 0.595488 |
| BCAR3   | 0.486783 | 2.016648 | 0.044959 | 0.090807 | 0.043902 | 0.088977 |
| BCAS1   | 0.543211 | 2.18448  | 0.029993 | 0.064635 | 0.029142 | 0.063265 |

|         |          |          |          |          |          |          |
|---------|----------|----------|----------|----------|----------|----------|
| BCAS2   | -0.19063 | -1.01678 | 0.310384 | 0.423962 | 0.309401 | 0.42322  |
| BCAT1   | 1.246765 | 5.651339 | 4.95E-08 | 6.55E-07 | 4.32E-08 | 5.79E-07 |
| BCAT2   | -0.3438  | -2.56741 | 0.010915 | 0.027798 | 0.011299 | 0.028644 |
| BCCIP   | 0.383106 | 1.904513 | 0.05816  | 0.113276 | 0.057402 | 0.111853 |
| BCKDHA  | 0.339127 | 2.296913 | 0.022573 | 0.051302 | 0.022887 | 0.051907 |
| BCKDK   | 0.185055 | 1.48252  | 0.139646 | 0.228132 | 0.142436 | 0.231455 |
| BCL10   | 1.261593 | 4.842629 | 2.43E-06 | 2.04E-05 | 2.12E-06 | 1.83E-05 |
| BCL2    | 0.086935 | 0.856171 | 0.392843 | 0.509061 | 0.400061 | 0.516563 |
| BCL2A1  | -0.10032 | -0.33395 | 0.738737 | 0.812559 | 0.737095 | 0.811556 |
| BCL2L1  | -0.40346 | -1.80012 | 0.073225 | 0.137005 | 0.072008 | 0.135212 |
| BCL2L11 | 0.296261 | 1.825462 | 0.0693   | 0.13107  | 0.069399 | 0.131144 |
| BCL2L13 | 0.398626 | 2.911101 | 0.003976 | 0.011923 | 0.004126 | 0.012318 |
| BCL2L2  | -0.07546 | -0.46617 | 0.641556 | 0.73634  | 0.641714 | 0.736342 |
| BCL3    | 0.160447 | 0.841427 | 0.401031 | 0.51753  | 0.399961 | 0.516563 |
| BCL6    | 0.695203 | 3.348316 | 0.000958 | 0.003564 | 0.000919 | 0.003425 |
| BCL6B   | 0.16505  | 2.052291 | 0.041336 | 0.084443 | 0.04752  | 0.095161 |
| BCL7A   | 0.213866 | 1.109801 | 0.268307 | 0.378578 | 0.267147 | 0.377167 |
| BCL7B   | 0.228704 | 1.435815 | 0.152488 | 0.244857 | 0.152797 | 0.245353 |
| BCL9    | 0.63308  | 5.348017 | 2.24E-07 | 2.51E-06 | 2.78E-07 | 3.02E-06 |
| BCR     | -0.04274 | -0.22655 | 0.820989 | 0.87161  | 0.820618 | 0.871224 |
| BCS1L   | 0.28974  | 1.976281 | 0.049384 | 0.098349 | 0.049957 | 0.099393 |
| BDKRB2  | 0.64536  | 2.457795 | 0.014759 | 0.03598  | 0.014203 | 0.034714 |
| BDNF    | 0.459274 | 1.945017 | 0.053059 | 0.104913 | 0.051933 | 0.102903 |
| BEX2    | 0.004852 | 0.008154 | 0.993502 | 0.996115 | 0.993445 | 0.996184 |
| BFSP1   | -0.10471 | -0.54325 | 0.58751  | 0.689826 | 0.586607 | 0.68978  |
| BICD1   | 0.220497 | 1.239009 | 0.216675 | 0.322473 | 0.216105 | 0.321728 |
| BICD2   | 0.664708 | 4.01033  | 8.33E-05 | 0.000455 | 8.29E-05 | 0.000452 |
| BID     | 0.372977 | 1.76442  | 0.079062 | 0.145493 | 0.07798  | 0.143785 |
| BIK     | -0.29757 | -0.80507 | 0.421656 | 0.537214 | 0.418176 | 0.533793 |
| BIN1    | 0.111738 | 0.583915 | 0.559881 | 0.666694 | 0.558972 | 0.665612 |
| BIN2    | 0.148289 | 1.170338 | 0.243143 | 0.352489 | 0.246243 | 0.355122 |
| BIRC2   | 0.699511 | 4.433321 | 1.47E-05 | 0.000101 | 1.49E-05 | 0.000103 |
| BIRC3   | 0.4738   | 1.410761 | 0.159741 | 0.253993 | 0.15679  | 0.250421 |
| BIRC5   | 0.909003 | 3.575961 | 0.00043  | 0.001823 | 0.000399 | 0.001699 |
| BIRC6   | 0.133013 | 1.054503 | 0.29282  | 0.405496 | 0.296066 | 0.408787 |
| BLCAP   | 0.639866 | 3.373472 | 0.000878 | 0.003324 | 0.000854 | 0.003234 |
| BLM     | 0.029825 | 0.141719 | 0.887433 | 0.919518 | 0.887037 | 0.919311 |
| BLMH    | 0.255473 | 1.038812 | 0.300043 | 0.412944 | 0.297578 | 0.409911 |
| BLOC1S1 | -0.43124 | -2.70049 | 0.007467 | 0.020182 | 0.007502 | 0.020289 |
| BLVRA   | 0.218784 | 0.960942 | 0.337646 | 0.452893 | 0.335526 | 0.450363 |
| BLVRB   | 0.530477 | 2.792795 | 0.00569  | 0.016024 | 0.005579 | 0.015785 |

|        |          |          |          |          |          |          |
|--------|----------|----------|----------|----------|----------|----------|
| BMP1   | 0.538714 | 4.469927 | 1.26E-05 | 8.86E-05 | 1.46E-05 | 0.000102 |
| BMP2   | 1.266303 | 3.103432 | 0.002166 | 0.00714  | 0.001997 | 0.006672 |
| BMP4   | -0.94275 | -2.80433 | 0.005497 | 0.015612 | 0.005171 | 0.014828 |
| BMP7   | -0.58338 | -2.69723 | 0.007538 | 0.020316 | 0.007305 | 0.019836 |
| BMPR1A | 0.55555  | 2.412531 | 0.01667  | 0.03979  | 0.01618  | 0.038739 |
| BMPR2  | 1.063966 | 6.156178 | 3.54E-09 | 6.23E-08 | 3.37E-09 | 6.04E-08 |
| BNIP1  | -0.22629 | -1.5066  | 0.133362 | 0.220317 | 0.134138 | 0.221043 |
| BNIP2  | 0.481881 | 3.164317 | 0.001776 | 0.006015 | 0.001805 | 0.006111 |
| BNIP3L | 0.973306 | 5.793759 | 2.39E-08 | 3.38E-07 | 2.32E-08 | 3.29E-07 |
| BPGM   | 0.824774 | 3.876986 | 0.00014  | 0.000709 | 0.000132 | 0.000674 |
| BRAF   | 1.275611 | 6.099401 | 4.79E-09 | 7.99E-08 | 4.18E-09 | 7.19E-08 |
| BRCA1  | 0.379833 | 2.239354 | 0.026143 | 0.057749 | 0.026069 | 0.057681 |
| BRCA2  | 0.647882 | 2.936762 | 0.003673 | 0.011122 | 0.003533 | 0.010755 |
| BRD1   | -0.13567 | -0.79227 | 0.429064 | 0.544733 | 0.428799 | 0.544691 |
| BRD2   | 0.588678 | 4.140662 | 4.95E-05 | 0.000292 | 5.21E-05 | 0.000302 |
| BRD4   | 0.787695 | 6.598373 | 3.11E-10 | 7.53E-09 | 4.14E-10 | 9.77E-09 |
| BRD8   | -0.34532 | -2.79264 | 0.005693 | 0.016024 | 0.006045 | 0.016961 |
| BRE    | 0.196409 | 1.74621  | 0.082183 | 0.149482 | 0.085496 | 0.15467  |
| BRF1   | -0.12846 | -1.28333 | 0.20074  | 0.305037 | 0.207949 | 0.312756 |
| BRI3   | 0.419349 | 2.152742 | 0.032437 | 0.068953 | 0.031985 | 0.068145 |
| BSCL2  | -0.15097 | -0.71332 | 0.476413 | 0.589713 | 0.474824 | 0.588229 |
| BSG    | -0.16304 | -0.7127  | 0.476794 | 0.589772 | 0.474839 | 0.588229 |
| BST1   | -0.17321 | -0.46887 | 0.639632 | 0.734491 | 0.63712  | 0.732287 |
| BST2   | -0.01435 | -0.03871 | 0.969156 | 0.979324 | 0.968924 | 0.979132 |
| BTAF1  | -0.22864 | -1.43037 | 0.154043 | 0.2471   | 0.154325 | 0.247214 |
| BTBD6  | 0.369659 | 2.297327 | 0.022549 | 0.051273 | 0.022614 | 0.051395 |
| BTC    | 0.250245 | 1.035828 | 0.30143  | 0.414489 | 0.299039 | 0.411557 |
| BTD    | 0.629279 | 3.693196 | 0.00028  | 0.001268 | 0.000277 | 0.001251 |
| BTF3   | 0.764527 | 5.80073  | 2.30E-08 | 3.29E-07 | 2.65E-08 | 3.73E-07 |
| BTG1   | -0.57737 | -2.81662 | 0.005299 | 0.015145 | 0.005149 | 0.014774 |
| BTG2   | 0.955376 | 3.772247 | 0.000208 | 0.000985 | 0.000192 | 0.000917 |
| BTG3   | -0.02467 | -0.08112 | 0.935418 | 0.956192 | 0.934993 | 0.955942 |
| BTK    | 0.192209 | 1.137059 | 0.256762 | 0.365802 | 0.256591 | 0.365508 |
| BTN2A1 | 0.111752 | 0.948986 | 0.343679 | 0.459391 | 0.34805  | 0.46403  |
| BTN2A2 | 0.500534 | 3.416382 | 0.000757 | 0.002947 | 0.000779 | 0.00302  |
| BTN3A1 | 0.068127 | 0.458124 | 0.64732  | 0.74056  | 0.648068 | 0.74128  |
| BTN3A2 | 0.397323 | 1.246325 | 0.213983 | 0.319276 | 0.210856 | 0.315915 |
| BTN3A3 | 0.100046 | 0.376352 | 0.707021 | 0.788001 | 0.705422 | 0.786759 |
| BTNL9  | 0.718576 | 4.025942 | 7.83E-05 | 0.00043  | 7.64E-05 | 0.00042  |
| BUB1   | 0.332703 | 1.955391 | 0.051815 | 0.102611 | 0.051692 | 0.102511 |
| BYSL   | 0.152336 | 0.723979 | 0.469855 | 0.58452  | 0.468284 | 0.583378 |

|           |          |          |          |          |          |          |
|-----------|----------|----------|----------|----------|----------|----------|
| C10orf10  | 0.163697 | 0.488603 | 0.625614 | 0.721744 | 0.623163 | 0.719623 |
| C10orf11  | 1.10219  | 3.888995 | 0.000134 | 0.000682 | 0.000121 | 0.000628 |
| C10orf116 | 0.222934 | 0.475903 | 0.63462  | 0.730263 | 0.631833 | 0.72749  |
| C10orf12  | 0.701944 | 6.129427 | 4.08E-09 | 7.05E-08 | 5.55E-09 | 9.15E-08 |
| C10orf26  | 0.50553  | 3.863119 | 0.000148 | 0.000742 | 0.00016  | 0.000791 |
| C10orf58  | 0.468474 | 1.329655 | 0.185022 | 0.286147 | 0.181823 | 0.281943 |
| C10orf72  | 0.87083  | 8.074428 | 4.56E-14 | 3.41E-12 | 8.08E-14 | 5.76E-12 |
| C10orf78  | 0.51428  | 2.270106 | 0.024179 | 0.054269 | 0.023563 | 0.053217 |
| C11orf31  | 0.468433 | 3.069791 | 0.002414 | 0.007847 | 0.00245  | 0.007936 |
| C13orf23  | -0.22435 | -1.26778 | 0.20623  | 0.310867 | 0.205709 | 0.310082 |
| C14orf102 | 0.095239 | 0.832926 | 0.405798 | 0.522101 | 0.410565 | 0.526941 |
| C14orf106 | 0.177077 | 0.809309 | 0.41922  | 0.535271 | 0.417371 | 0.5332   |
| C14orf118 | 0.185557 | 1.288758 | 0.198848 | 0.302392 | 0.2002   | 0.304412 |
| C14orf2   | -0.13358 | -0.82463 | 0.410483 | 0.526692 | 0.410694 | 0.526962 |
| C14orf45  | 0.11247  | 0.7882   | 0.431436 | 0.547448 | 0.432936 | 0.548696 |
| C14orf79  | -0.13113 | -1.02008 | 0.30882  | 0.422302 | 0.311788 | 0.425618 |
| C15orf29  | 0.31547  | 1.312382 | 0.190771 | 0.293675 | 0.188598 | 0.290626 |
| C16orf7   | 0.272731 | 1.550505 | 0.122471 | 0.205429 | 0.122073 | 0.204982 |
| C18orf1   | 0.247443 | 1.403265 | 0.161961 | 0.256561 | 0.1615   | 0.256004 |
| C18orf10  | -0.08759 | -0.38397 | 0.701372 | 0.784308 | 0.700119 | 0.783094 |
| C19orf10  | -0.02801 | -0.15449 | 0.877368 | 0.910494 | 0.877184 | 0.910304 |
| C19orf18  | 0.376246 | 1.772902 | 0.077641 | 0.143542 | 0.076558 | 0.141885 |
| C19orf2   | 0.214661 | 0.640951 | 0.522228 | 0.632922 | 0.51928  | 0.630976 |
| C19orf24  | 0.183985 | 1.350063 | 0.178396 | 0.27743  | 0.18032  | 0.279895 |
| C19orf28  | 0.012508 | 0.104878 | 0.916569 | 0.942848 | 0.917284 | 0.943082 |
| C1orf35   | 0.037932 | 0.318055 | 0.750748 | 0.821923 | 0.752822 | 0.823618 |
| C1orf9    | 0.461394 | 2.719725 | 0.00706  | 0.019259 | 0.007029 | 0.019226 |
| C1QA      | 0.189866 | 0.836327 | 0.403887 | 0.520358 | 0.401837 | 0.518131 |
| C1QB      | -0.04172 | -0.16947 | 0.865588 | 0.903256 | 0.864907 | 0.902746 |
| C1QL1     | 0.16465  | 1.624115 | 0.105796 | 0.182944 | 0.111185 | 0.190579 |
| C1R       | 0.752232 | 4.084087 | 6.22E-05 | 0.000352 | 6.01E-05 | 0.00034  |
| C1RL      | 0.641679 | 3.923244 | 0.000117 | 0.000607 | 0.000117 | 0.000608 |
| C1S       | -0.15616 | -0.62083 | 0.535361 | 0.644353 | 0.533201 | 0.642181 |
| C2        | -0.75886 | -3.23248 | 0.001417 | 0.004983 | 0.001344 | 0.004768 |
| C20orf103 | 0.152887 | 0.341414 | 0.733121 | 0.808842 | 0.731036 | 0.807111 |
| C20orf111 | 0.420954 | 2.621725 | 0.009365 | 0.02448  | 0.0094   | 0.024512 |
| C20orf24  | 0.308737 | 2.077755 | 0.038903 | 0.080371 | 0.039332 | 0.081079 |
| C20orf3   | 0.700705 | 3.802334 | 0.000186 | 0.000894 | 0.000181 | 0.000877 |
| C20orf4   | 0.665305 | 6.154677 | 3.57E-09 | 6.23E-08 | 5.24E-09 | 8.70E-08 |
| C20orf7   | -0.16122 | -1.04753 | 0.296015 | 0.409197 | 0.296735 | 0.409316 |
| C21orf2   | 0.151505 | 1.456296 | 0.146749 | 0.237181 | 0.152477 | 0.245174 |

|          |          |          |          |          |          |          |
|----------|----------|----------|----------|----------|----------|----------|
| C21orf33 | -0.03949 | -0.24958 | 0.803144 | 0.858489 | 0.803324 | 0.858876 |
| C21orf63 | 0.677582 | 2.041102 | 0.042445 | 0.08648  | 0.041005 | 0.083975 |
| C21orf7  | 1.411287 | 5.732056 | 3.28E-08 | 4.52E-07 | 2.77E-08 | 3.87E-07 |
| C21orf70 | 0.640128 | 5.494602 | 1.09E-07 | 1.31E-06 | 1.38E-07 | 1.63E-06 |
| C3AR1    | 0.246887 | 1.497534 | 0.135701 | 0.223083 | 0.135732 | 0.222901 |
| C3orf1   | 0.099902 | 0.629355 | 0.529776 | 0.639925 | 0.53013  | 0.639038 |
| C3orf19  | 0.960963 | 5.257552 | 3.48E-07 | 3.71E-06 | 3.29E-07 | 3.50E-06 |
| C4BPB    | 2.11027  | 4.802343 | 2.91E-06 | 2.40E-05 | 2.42E-06 | 2.04E-05 |
| C4orf14  | 0.176934 | 1.230854 | 0.219704 | 0.32595  | 0.221112 | 0.327831 |
| C5       | -0.80211 | -1.93707 | 0.054029 | 0.106339 | 0.052155 | 0.103213 |
| C5orf13  | -0.26248 | -1.29663 | 0.19613  | 0.299662 | 0.194753 | 0.297962 |
| C5orf15  | 0.006707 | 0.061811 | 0.95077  | 0.967187 | 0.951372 | 0.967637 |
| C6       | 1.55358  | 3.042126 | 0.002637 | 0.008427 | 0.002425 | 0.007877 |
| C6orf1   | -0.16621 | -1.1399  | 0.255579 | 0.364448 | 0.256868 | 0.365707 |
| C6orf108 | -0.28378 | -1.159   | 0.247726 | 0.356713 | 0.245332 | 0.354113 |
| C6orf129 | 0.311556 | 1.922736 | 0.055816 | 0.109352 | 0.055909 | 0.109647 |
| C6orf130 | 0.319908 | 1.396032 | 0.164125 | 0.259464 | 0.162246 | 0.25684  |
| C6orf153 | -0.14497 | -0.66638 | 0.505871 | 0.61852  | 0.504206 | 0.616967 |
| C6orf35  | 0.641937 | 5.664305 | 4.63E-08 | 6.17E-07 | 6.15E-08 | 7.94E-07 |
| C6orf64  | 0.310951 | 1.593332 | 0.112535 | 0.192542 | 0.111595 | 0.191004 |
| C6orf89  | 0.749755 | 5.164314 | 5.43E-07 | 5.53E-06 | 5.75E-07 | 5.84E-06 |
| C7       | -0.18359 | -0.42526 | 0.671065 | 0.759818 | 0.668582 | 0.757554 |
| C7orf26  | 0.384253 | 3.237359 | 0.001395 | 0.004911 | 0.001529 | 0.005317 |
| C9orf114 | 0.448284 | 3.807765 | 0.000182 | 0.00088  | 0.000207 | 0.000973 |
| C9orf23  | 0.565485 | 2.858721 | 0.004666 | 0.013647 | 0.004549 | 0.013345 |
| C9orf3   | 0.48997  | 1.902785 | 0.058386 | 0.113593 | 0.057011 | 0.111276 |
| CA1      | 0.102041 | 0.35949  | 0.719577 | 0.798774 | 0.717917 | 0.797459 |
| CA11     | 0.873556 | 3.807636 | 0.000182 | 0.00088  | 0.00017  | 0.000833 |
| CA12     | 0.598714 | 1.272957 | 0.204389 | 0.308884 | 0.20068  | 0.304945 |
| CA2      | -1.02161 | -2.15285 | 0.032429 | 0.068953 | 0.031021 | 0.066394 |
| CA3      | 1.70335  | 5.010033 | 1.12E-06 | 1.07E-05 | 9.39E-07 | 9.11E-06 |
| CA8      | 0.029726 | 0.118996 | 0.905388 | 0.93462  | 0.904895 | 0.934111 |
| CA9      | -0.39887 | -0.82305 | 0.41138  | 0.527554 | 0.407501 | 0.523437 |
| CAB39L   | 1.084967 | 3.770935 | 0.000209 | 0.000988 | 0.000191 | 0.000913 |
| CABIN1   | -0.11789 | -0.82    | 0.41311  | 0.529484 | 0.414544 | 0.530482 |
| CABYR    | 0.376872 | 1.80667  | 0.072193 | 0.135343 | 0.071208 | 0.133968 |
| CACNA1A  | 0.532174 | 1.916114 | 0.056659 | 0.110772 | 0.055176 | 0.108423 |
| CACNA1C  | -0.0146  | -0.0972  | 0.922657 | 0.946212 | 0.922816 | 0.946374 |
| CACNA1D  | 0.545886 | 2.204831 | 0.028511 | 0.062067 | 0.027695 | 0.060627 |
| CACNA1H  | 0.278609 | 2.656781 | 0.008473 | 0.022437 | 0.009392 | 0.024511 |
| CACNA1I  | -0.6608  | -5.67575 | 4.37E-08 | 5.85E-07 | 5.64E-08 | 7.36E-07 |

|          |          |          |          |          |          |          |
|----------|----------|----------|----------|----------|----------|----------|
| CACNA2D1 | 1.214478 | 4.936289 | 1.58E-06 | 1.41E-05 | 1.39E-06 | 1.28E-05 |
| CACNA2D2 | 0.693013 | 2.893526 | 0.004196 | 0.012487 | 0.004012 | 0.012033 |
| CACNA2D3 | -0.80579 | -2.79704 | 0.005618 | 0.01586  | 0.005323 | 0.015201 |
| CACNA2D4 | -0.65552 | -3.68928 | 0.000284 | 0.001281 | 0.000278 | 0.001253 |
| CACNB1   | 0.104182 | 0.988537 | 0.323985 | 0.438196 | 0.330536 | 0.445517 |
| CACNB3   | -0.17789 | -0.99262 | 0.321997 | 0.436372 | 0.321348 | 0.435255 |
| CACYBP   | 0.087252 | 0.56604  | 0.571949 | 0.677289 | 0.572515 | 0.677823 |
| CAD      | -0.06637 | -0.64099 | 0.522203 | 0.632922 | 0.528159 | 0.637644 |
| CALCRL   | 1.937727 | 7.530136 | 1.33E-12 | 6.06E-11 | 9.81E-13 | 4.61E-11 |
| CALD1    | -0.38265 | -1.85114 | 0.065503 | 0.125018 | 0.0646   | 0.123473 |
| CALM2    | 0.285464 | 4.440088 | 1.43E-05 | 9.86E-05 | 3.52E-05 | 0.000217 |
| CALM3    | -0.13286 | -0.81757 | 0.414497 | 0.530947 | 0.414679 | 0.530482 |
| CALR     | 0.59205  | 2.797386 | 0.005613 | 0.015853 | 0.005439 | 0.015456 |
| CAMK1    | 0.002869 | 0.024508 | 0.98047  | 0.987191 | 0.980651 | 0.987373 |
| CAMK1D   | 0.51285  | 2.392685 | 0.017574 | 0.041548 | 0.017147 | 0.040614 |
| CAMK2B   | 0.303576 | 2.137283 | 0.033689 | 0.071105 | 0.034271 | 0.072134 |
| CAMK2D   | -0.04929 | -0.2246  | 0.822503 | 0.872545 | 0.821804 | 0.872017 |
| CAMKK2   | 0.123783 | 0.932346 | 0.352189 | 0.467596 | 0.354685 | 0.469983 |
| CAMP     | 0.708708 | 3.813767 | 0.000178 | 0.000864 | 0.000173 | 0.000843 |
| CANX     | 0.029828 | 0.161144 | 0.872129 | 0.906158 | 0.871898 | 0.906018 |
| CAP2     | 0.954683 | 3.708892 | 0.000264 | 0.001203 | 0.000244 | 0.001128 |
| CAPN1    | -0.11042 | -1.03405 | 0.30226  | 0.415387 | 0.308525 | 0.422514 |
| CAPN12   | 0.197103 | 0.657483 | 0.511564 | 0.623535 | 0.508816 | 0.621152 |
| CAPN2    | 0.132163 | 0.822656 | 0.411603 | 0.527696 | 0.411889 | 0.528063 |
| CAPN3    | -0.15135 | -0.77519 | 0.439068 | 0.555035 | 0.43788  | 0.553376 |
| CAPN5    | 0.287161 | 1.222878 | 0.222696 | 0.329868 | 0.220528 | 0.327069 |
| CAPN7    | 0.571778 | 3.428455 | 0.000726 | 0.002863 | 0.000723 | 0.002838 |
| CAPN9    | -0.48214 | -1.24913 | 0.212956 | 0.318046 | 0.209464 | 0.31443  |
| CAPNS1   | -0.22627 | -1.47216 | 0.142421 | 0.231298 | 0.143017 | 0.232266 |
| CAPS     | -1.3738  | -4.0524  | 7.05E-05 | 0.000393 | 6.25E-05 | 0.000352 |
| CAPZA3   | -0.33064 | -2.12926 | 0.034354 | 0.072244 | 0.034574 | 0.072641 |
| CAPZB    | 0.396919 | 2.964567 | 0.003368 | 0.010333 | 0.00352  | 0.01073  |
| CARD11   | -0.34616 | -2.09741 | 0.03711  | 0.077209 | 0.037113 | 0.077249 |
| CARHSP1  | 0.491479 | 3.738121 | 0.000237 | 0.001097 | 0.000255 | 0.001167 |
| CARS     | -1.12738 | -5.81305 | 2.16E-08 | 3.10E-07 | 1.96E-08 | 2.83E-07 |
| CASC3    | -0.0983  | -0.35807 | 0.720636 | 0.799396 | 0.719042 | 0.798181 |
| CASK     | 0.612693 | 2.331236 | 0.020654 | 0.047655 | 0.019944 | 0.04622  |
| CASP1    | 0.238033 | 0.770021 | 0.442121 | 0.557765 | 0.439073 | 0.554593 |
| CASP10   | 0.455142 | 5.303211 | 2.79E-07 | 3.04E-06 | 5.14E-07 | 5.30E-06 |
| CASP2    | 0.219411 | 1.27753  | 0.202774 | 0.307328 | 0.202483 | 0.306397 |
| CASP3    | -0.31352 | -2.39917 | 0.017274 | 0.041003 | 0.017894 | 0.042072 |

|         |          |          |          |          |          |          |
|---------|----------|----------|----------|----------|----------|----------|
| CASP4   | -0.30298 | -1.9741  | 0.049633 | 0.098761 | 0.049971 | 0.099393 |
| CASP7   | 0.235526 | 1.012253 | 0.312539 | 0.426396 | 0.310313 | 0.424221 |
| CASP9   | 0.2924   | 1.970076 | 0.050096 | 0.099556 | 0.050608 | 0.100574 |
| CASQ2   | 0.061758 | 0.167271 | 0.867311 | 0.904338 | 0.866325 | 0.90388  |
| CAST    | 0.152489 | 0.882074 | 0.378708 | 0.495664 | 0.378354 | 0.494787 |
| CAT     | -0.15715 | -0.5964  | 0.551524 | 0.658578 | 0.549273 | 0.65639  |
| CAV2    | 0.946024 | 2.95889  | 0.003428 | 0.01049  | 0.003212 | 0.009951 |
| CBFA2T2 | -0.16363 | -1.00078 | 0.318045 | 0.432026 | 0.318173 | 0.431576 |
| CBFB    | -0.04744 | -0.31136 | 0.755821 | 0.825938 | 0.75623  | 0.825809 |
| CBL     | 0.078484 | 0.26961  | 0.787715 | 0.846869 | 0.786402 | 0.846368 |
| CBR1    | -0.87962 | -3.54582 | 0.000479 | 0.001999 | 0.000447 | 0.001885 |
| CBR3    | -0.19226 | -0.61116 | 0.541731 | 0.650535 | 0.538993 | 0.647728 |
| CBR4    | -0.7245  | -3.48993 | 0.000585 | 0.002378 | 0.000559 | 0.002286 |
| CBS     | -0.32926 | -1.06334 | 0.288805 | 0.401355 | 0.285584 | 0.397349 |
| CBX1    | 0.380846 | 2.455331 | 0.014858 | 0.036183 | 0.014979 | 0.036437 |
| CBX3    | 0.877337 | 5.095658 | 7.52E-07 | 7.52E-06 | 7.31E-07 | 7.31E-06 |
| CBX5    | 0.647085 | 3.509843 | 0.000545 | 0.00223  | 0.000531 | 0.002189 |
| CBX6    | 0.603699 | 3.868946 | 0.000144 | 0.00073  | 0.000146 | 0.000734 |
| CBX7    | 0.161846 | 0.962052 | 0.337089 | 0.452275 | 0.336961 | 0.451716 |
| CCBL1   | 0.332563 | 2.837515 | 0.004976 | 0.014417 | 0.005376 | 0.015304 |
| CCL11   | 0.824162 | 1.587892 | 0.11376  | 0.193863 | 0.110734 | 0.190015 |
| CCL13   | 0.540927 | 2.736462 | 0.006722 | 0.018518 | 0.006567 | 0.018155 |
| CCL16   | 1.074164 | 8.000891 | 7.24E-14 | 4.93E-12 | 8.70E-14 | 6.01E-12 |
| CCL18   | 1.28878  | 2.599324 | 0.009979 | 0.02584  | 0.009372 | 0.024472 |
| CCL19   | -0.64248 | -1.45261 | 0.14777  | 0.238667 | 0.144518 | 0.23438  |
| CCL20   | 0.89731  | 1.442342 | 0.150641 | 0.24247  | 0.147098 | 0.237826 |
| CCL23   | 0.29835  | 0.977139 | 0.329584 | 0.444234 | 0.326389 | 0.441067 |
| CCL26   | 0.524886 | 1.126344 | 0.261258 | 0.371083 | 0.257355 | 0.366129 |
| CCL5    | -0.48113 | -1.7021  | 0.090162 | 0.161371 | 0.088193 | 0.158572 |
| CCM2    | -0.24714 | -2.00742 | 0.045939 | 0.092468 | 0.047565 | 0.095211 |
| CCNA2   | 0.004466 | 0.02324  | 0.98148  | 0.987997 | 0.981436 | 0.987952 |
| CCNB2   | 0.006042 | 0.056108 | 0.955308 | 0.970048 | 0.955868 | 0.97032  |
| CCNC    | 0.262797 | 1.537856 | 0.125534 | 0.209893 | 0.125318 | 0.209382 |
| CCND1   | -0.2536  | -0.69132 | 0.490098 | 0.602055 | 0.486856 | 0.598542 |
| CCND2   | -1.28743 | -3.22188 | 0.001468 | 0.005131 | 0.001347 | 0.004775 |
| CCND3   | -0.84067 | -4.51692 | 1.03E-05 | 7.41E-05 | 9.82E-06 | 7.16E-05 |
| CCNE2   | 0.357425 | 1.374543 | 0.170684 | 0.267941 | 0.168312 | 0.26511  |
| CCNF    | 0.036794 | 0.276289 | 0.782588 | 0.843422 | 0.783671 | 0.844438 |
| CCNG1   | 0.137771 | 0.650216 | 0.516237 | 0.628253 | 0.51472  | 0.626894 |
| CCNH    | 0.285387 | 1.814641 | 0.070954 | 0.133821 | 0.071231 | 0.133968 |
| CCNI    | 0.52312  | 4.3749   | 1.88E-05 | 0.000126 | 2.19E-05 | 0.000143 |



|       |          |          |          |          |          |          |
|-------|----------|----------|----------|----------|----------|----------|
| CCNK  | 0.214006 | 1.965921 | 0.050577 | 0.100385 | 0.053392 | 0.10535  |
| CCNL1 | -0.67681 | -3.88964 | 0.000133 | 0.000681 | 0.000131 | 0.00067  |
| CCNL2 | -0.17794 | -1.10491 | 0.270418 | 0.381214 | 0.270683 | 0.381129 |
| CCNT1 | 1.055139 | 6.554254 | 3.98E-10 | 9.40E-09 | 3.94E-10 | 9.45E-09 |
| CCNT2 | 0.56712  | 4.908681 | 1.80E-06 | 1.58E-05 | 2.21E-06 | 1.89E-05 |
| CCR1  | 1.352764 | 7.157491 | 1.24E-11 | 4.73E-10 | 1.08E-11 | 4.17E-10 |
| CCRL1 | 0.789501 | 1.916267 | 0.056639 | 0.110772 | 0.054714 | 0.107776 |
| CCS   | 0.970503 | 5.620259 | 5.79E-08 | 7.56E-07 | 5.57E-08 | 7.32E-07 |
| CCT2  | -0.3295  | -1.52736 | 0.128122 | 0.213309 | 0.126661 | 0.211224 |
| CCT4  | 0.239584 | 2.65143  | 0.008604 | 0.022756 | 0.010099 | 0.026108 |
| CCT5  | -0.33597 | -1.51475 | 0.131283 | 0.217801 | 0.129692 | 0.215314 |
| CCT6A | 0.517041 | 3.14589  | 0.001887 | 0.006371 | 0.001886 | 0.006347 |
| CCT6B | 0.760146 | 3.205574 | 0.00155  | 0.005385 | 0.00147  | 0.005154 |
| CCT7  | -0.06395 | -0.54487 | 0.586402 | 0.689368 | 0.589838 | 0.69254  |
| CCT8  | -0.03207 | -0.32682 | 0.74412  | 0.816951 | 0.748293 | 0.820322 |
| CD14  | 0.111159 | 0.47578  | 0.634707 | 0.730263 | 0.633136 | 0.728455 |
| CD163 | 0.408109 | 1.632224 | 0.104076 | 0.180826 | 0.102265 | 0.178156 |
| CD19  | -0.76066 | -2.91092 | 0.003978 | 0.011923 | 0.003777 | 0.0114   |
| CD1A  | 0.483715 | 2.094745 | 0.037349 | 0.077672 | 0.036487 | 0.076048 |
| CD1C  | -0.22971 | -1.02416 | 0.306896 | 0.420405 | 0.304846 | 0.418207 |
| CD1D  | 0.126312 | 0.457958 | 0.647439 | 0.74056  | 0.645472 | 0.739328 |
| CD2   | -0.91042 | -4.84972 | 2.35E-06 | 1.98E-05 | 2.22E-06 | 1.90E-05 |
| CD200 | 0.562486 | 2.175047 | 0.030702 | 0.065861 | 0.029786 | 0.064257 |
| CD22  | -0.51014 | -3.40717 | 0.000782 | 0.003012 | 0.000799 | 0.003086 |
| CD226 | -0.25394 | -1.74003 | 0.083266 | 0.150867 | 0.084083 | 0.152642 |
| CD2AP | 0.387245 | 2.862821 | 0.004608 | 0.013512 | 0.004792 | 0.013929 |
| CD33  | 0.569814 | 3.271145 | 0.001245 | 0.00444  | 0.00123  | 0.004407 |
| CD34  | 0.505424 | 2.553474 | 0.011348 | 0.028738 | 0.011115 | 0.02827  |
| CD36  | 1.604413 | 3.482908 | 0.000599 | 0.002428 | 0.00054  | 0.00222  |
| CD37  | -0.86321 | -3.99479 | 8.86E-05 | 0.000477 | 8.29E-05 | 0.000452 |
| CD38  | 0.023895 | 0.081473 | 0.93514  | 0.956192 | 0.934727 | 0.955878 |
| CD3D  | -0.63247 | -3.79494 | 0.000191 | 0.000918 | 0.00019  | 0.000913 |
| CD3E  | 0.090576 | 0.428972 | 0.668367 | 0.757779 | 0.667253 | 0.756413 |
| CD3G  | 0.050987 | 0.252739 | 0.800708 | 0.856577 | 0.800119 | 0.856352 |
| CD4   | 0.092589 | 0.95719  | 0.339532 | 0.454903 | 0.348083 | 0.46403  |
| CD40  | -0.15211 | -0.58175 | 0.561333 | 0.667915 | 0.559141 | 0.665644 |
| CD44  | 0.00863  | 0.026645 | 0.978767 | 0.986328 | 0.97862  | 0.986232 |
| CD48  | -0.50282 | -3.82299 | 0.000172 | 0.000836 | 0.000185 | 0.000896 |
| CD5   | -0.14962 | -1.04367 | 0.297794 | 0.410931 | 0.299306 | 0.411688 |
| CD53  | -0.04991 | -0.54597 | 0.585645 | 0.688994 | 0.593427 | 0.695018 |
| CD58  | 0.337015 | 1.405112 | 0.161411 | 0.256209 | 0.159366 | 0.253304 |

|          |          |          |          |          |          |          |
|----------|----------|----------|----------|----------|----------|----------|
| CD59     | 0.469564 | 2.262601 | 0.024646 | 0.055107 | 0.024156 | 0.054193 |
| CD6      | 0.133422 | 1.022032 | 0.307899 | 0.421533 | 0.310642 | 0.424547 |
| CD68     | 1.257797 | 6.797123 | 1.01E-10 | 2.85E-09 | 9.04E-11 | 2.64E-09 |
| CD79B    | 0.313925 | 2.380321 | 0.018159 | 0.042652 | 0.01877  | 0.043913 |
| CD80     | 0.199775 | 1.04244  | 0.298362 | 0.411232 | 0.297229 | 0.40967  |
| CD81     | 0.506302 | 3.563566 | 0.000449 | 0.001893 | 0.000468 | 0.001954 |
| CD83     | 0.100204 | 0.472694 | 0.636905 | 0.732074 | 0.635685 | 0.730851 |
| CD86     | 0.982092 | 5.97358  | 9.35E-09 | 1.45E-07 | 9.19E-09 | 1.46E-07 |
| CD8A     | -0.803   | -2.90516 | 0.004049 | 0.012105 | 0.003831 | 0.011527 |
| CD9      | -0.44864 | -1.55909 | 0.120425 | 0.202576 | 0.118111 | 0.199547 |
| CD97     | 0.243757 | 1.032121 | 0.303159 | 0.416378 | 0.300867 | 0.413593 |
| CD99     | -0.51085 | -2.47055 | 0.014257 | 0.034883 | 0.01393  | 0.03426  |
| CD99L2   | -0.1288  | -1.08759 | 0.277977 | 0.389184 | 0.282232 | 0.393617 |
| CDA      | -0.18611 | -0.50313 | 0.615383 | 0.71274  | 0.61273  | 0.710368 |
| CDC14A   | 0.164623 | 1.185798 | 0.236993 | 0.344957 | 0.238842 | 0.347111 |
| CDC16    | 0.351701 | 1.877426 | 0.061795 | 0.119032 | 0.06126  | 0.118097 |
| CDC23    | 1.00811  | 6.694306 | 1.81E-10 | 4.75E-09 | 1.89E-10 | 4.98E-09 |
| CDC25C   | -0.00381 | -0.02107 | 0.983213 | 0.989105 | 0.983188 | 0.98908  |
| CDC34    | 0.006021 | 0.038503 | 0.969322 | 0.979324 | 0.969358 | 0.97936  |
| CDC37    | -0.0398  | -0.29186 | 0.770668 | 0.83575  | 0.771659 | 0.836567 |
| CDC37L1  | 0.675985 | 3.048463 | 0.002585 | 0.008309 | 0.002478 | 0.008009 |
| CDC40    | 0.592686 | 4.298905 | 2.59E-05 | 0.000165 | 2.77E-05 | 0.000175 |
| CDC42    | 0.15329  | 0.859746 | 0.390873 | 0.506649 | 0.390279 | 0.506436 |
| CDC42BPA | 0.721588 | 3.998773 | 8.72E-05 | 0.000473 | 8.48E-05 | 0.000461 |
| CDC42BPB | 0.030426 | 0.210181 | 0.833723 | 0.880214 | 0.834201 | 0.880077 |
| CDC42EP1 | -0.1412  | -0.70467 | 0.481766 | 0.594616 | 0.480478 | 0.593339 |
| CDC42EP3 | 0.584544 | 2.447853 | 0.015162 | 0.036788 | 0.014671 | 0.035726 |
| CDC5L    | 0.072325 | 0.444279 | 0.657282 | 0.747996 | 0.657399 | 0.747949 |
| CDC6     | -0.1209  | -0.31532 | 0.752822 | 0.823426 | 0.750994 | 0.822001 |
| CDCA3    | 0.320267 | 1.615393 | 0.107672 | 0.185437 | 0.106679 | 0.184131 |
| CDCA4    | -0.35061 | -2.1202  | 0.03512  | 0.073459 | 0.035115 | 0.073548 |
| CDH1     | 0.07002  | 0.156346 | 0.875905 | 0.909177 | 0.874905 | 0.90834  |
| CDH13    | 2.095736 | 7.938584 | 1.07E-13 | 7.08E-12 | 7.58E-14 | 5.57E-12 |
| CDH15    | 0.312233 | 3.178914 | 0.001693 | 0.005794 | 0.002013 | 0.006713 |
| CDH16    | -0.66515 | -1.90873 | 0.057611 | 0.112307 | 0.055814 | 0.109576 |
| CDH17    | 0.874592 | 1.564127 | 0.119238 | 0.201066 | 0.116096 | 0.197199 |
| CDH3     | -0.54019 | -1.26495 | 0.207239 | 0.312086 | 0.203628 | 0.307635 |
| CDK2     | 0.084056 | 0.423438 | 0.672393 | 0.76059  | 0.671526 | 0.759477 |
| CDK3     | 0.367641 | 2.99648  | 0.003047 | 0.009521 | 0.003269 | 0.010088 |
| CDK4     | 0.175179 | 0.946508 | 0.344937 | 0.460439 | 0.34405  | 0.459647 |
| CDK5     | -0.20844 | -1.12458 | 0.262005 | 0.371919 | 0.261114 | 0.370655 |

|          |          |          |          |          |          |          |
|----------|----------|----------|----------|----------|----------|----------|
| CDK5RAP1 | 0.178403 | 1.356032 | 0.176492 | 0.275128 | 0.17884  | 0.277867 |
| CDK6     | -0.15191 | -0.42419 | 0.671846 | 0.760153 | 0.669565 | 0.758485 |
| CDKL5    | -0.01816 | -0.20984 | 0.833988 | 0.880214 | 0.83792  | 0.882713 |
| CDKN1A   | -0.09645 | -0.57623 | 0.565052 | 0.671397 | 0.564989 | 0.67091  |
| CDKN1B   | 0.047928 | 0.238754 | 0.811521 | 0.864551 | 0.810974 | 0.864304 |
| CDKN1C   | 0.58071  | 1.691055 | 0.092255 | 0.164679 | 0.089928 | 0.161014 |
| CDKN2A   | 0.609827 | 1.146381 | 0.252894 | 0.361729 | 0.248879 | 0.357936 |
| CDKN2C   | 1.462609 | 7.544177 | 1.22E-12 | 5.67E-11 | 1.03E-12 | 4.80E-11 |
| CDKN2D   | 0.218146 | 2.083072 | 0.038411 | 0.079389 | 0.041115 | 0.084055 |
| CDKN3    | 0.440427 | 1.54593  | 0.123572 | 0.206907 | 0.121254 | 0.203825 |
| CDO1     | -0.32395 | -0.99015 | 0.323196 | 0.43738  | 0.319827 | 0.433445 |
| CDR2     | 0.873695 | 4.299126 | 2.59E-05 | 0.000165 | 2.43E-05 | 0.000156 |
| CDS1     | 0.619418 | 2.678112 | 0.007968 | 0.021326 | 0.007683 | 0.020682 |
| CDS2     | 0.865225 | 6.150618 | 3.64E-09 | 6.34E-08 | 4.01E-09 | 6.97E-08 |
| CDX1     | -0.21356 | -0.71782 | 0.473639 | 0.588138 | 0.470781 | 0.585207 |
| CDX2     | 0.976436 | 3.734838 | 0.00024  | 0.001108 | 0.000221 | 0.001032 |
| CDYL     | -0.02589 | -0.16262 | 0.870972 | 0.905656 | 0.871075 | 0.90576  |
| CEACAM1  | -0.70192 | -2.03651 | 0.042908 | 0.087212 | 0.041423 | 0.084647 |
| CEACAM5  | 0.586318 | 1.489822 | 0.137716 | 0.225529 | 0.134693 | 0.221582 |
| CEACAM7  | -0.39224 | -0.65938 | 0.510351 | 0.622853 | 0.506681 | 0.618867 |
| CEBPG    | 0.206342 | 0.866228 | 0.387317 | 0.503827 | 0.385029 | 0.501702 |
| CECR6    | 0.752812 | 4.710102 | 4.41E-06 | 3.51E-05 | 4.43E-06 | 3.51E-05 |
| CELSR2   | 0.566548 | 2.579795 | 0.010543 | 0.027092 | 0.01023  | 0.026397 |
| CELSR3   | 1.643096 | 5.513644 | 9.89E-08 | 1.21E-06 | 8.13E-08 | 1.01E-06 |
| CENPA    | 0.914196 | 4.996441 | 1.20E-06 | 1.13E-05 | 1.14E-06 | 1.07E-05 |
| CENPB    | -0.0323  | -0.16687 | 0.867629 | 0.904382 | 0.867305 | 0.904244 |
| CENPF    | 0.471107 | 2.584183 | 0.010414 | 0.026775 | 0.010283 | 0.026511 |
| CEPT1    | 0.03181  | 0.213056 | 0.831482 | 0.878791 | 0.831846 | 0.879037 |
| CERK     | -0.08523 | -0.40121 | 0.688659 | 0.773774 | 0.687584 | 0.772425 |
| CETN2    | -0.34385 | -1.68758 | 0.092922 | 0.165805 | 0.091886 | 0.164082 |
| CETP     | 0.733175 | 2.659132 | 0.008416 | 0.022309 | 0.008029 | 0.021442 |
| CFDP1    | 0.371663 | 1.251195 | 0.212204 | 0.317631 | 0.209261 | 0.314226 |
| CFH      | 1.573116 | 4.135266 | 5.06E-05 | 0.000297 | 4.43E-05 | 0.000265 |
| CFLAR    | 0.527644 | 2.826115 | 0.005149 | 0.014812 | 0.005057 | 0.014564 |
| CGGBP1   | 0.482252 | 3.689835 | 0.000283 | 0.00128  | 0.000305 | 0.001353 |
| CGNL1    | 1.030545 | 4.57197  | 8.10E-06 | 5.95E-05 | 7.37E-06 | 5.51E-05 |
| CH25H    | 0.552035 | 1.481398 | 0.139945 | 0.228541 | 0.136977 | 0.224681 |
| CHAD     | 0.092359 | 0.404344 | 0.686357 | 0.771925 | 0.685044 | 0.770449 |
| CHAF1A   | 0.159223 | 1.11884  | 0.26444  | 0.374357 | 0.26602  | 0.376005 |
| CHAF1B   | -0.34837 | -2.25728 | 0.024982 | 0.055673 | 0.025176 | 0.056026 |
| CHCHD1   | 0.183791 | 0.992319 | 0.322142 | 0.436372 | 0.321247 | 0.435243 |

|         |          |          |          |          |          |          |
|---------|----------|----------|----------|----------|----------|----------|
| CHCHD5  | -0.11567 | -0.9102  | 0.363724 | 0.479928 | 0.36684  | 0.482737 |
| CHD2    | 0.235251 | 1.368975 | 0.172416 | 0.270209 | 0.172133 | 0.269545 |
| CHD3    | 0.1699   | 1.206724 | 0.228846 | 0.335594 | 0.230511 | 0.337435 |
| CHD4    | 0.674785 | 4.798538 | 2.96E-06 | 2.44E-05 | 3.17E-06 | 2.59E-05 |
| CHD6    | 0.284061 | 2.474449 | 0.014107 | 0.034603 | 0.015073 | 0.03663  |
| CHD7    | 0.042054 | 0.282351 | 0.777942 | 0.839763 | 0.778427 | 0.840094 |
| CHEK1   | -0.00279 | -0.0122  | 0.990281 | 0.99433  | 0.990238 | 0.994345 |
| CHFR    | -0.01128 | -0.04245 | 0.966177 | 0.977407 | 0.965983 | 0.977211 |
| CHGA    | -0.39917 | -0.77741 | 0.437761 | 0.553829 | 0.433904 | 0.549541 |
| CHKA    | 0.02854  | 0.119435 | 0.905041 | 0.934467 | 0.904582 | 0.933993 |
| CHN1    | 0.535272 | 2.59851  | 0.010002 | 0.025885 | 0.009753 | 0.025326 |
| CHN2    | 0.025571 | 0.093659 | 0.925466 | 0.947851 | 0.925026 | 0.947444 |
| CHODL   | 0.981852 | 3.115759 | 0.002081 | 0.006904 | 0.001939 | 0.0065   |
| CHORDC1 | 0.39923  | 3.108864 | 0.002128 | 0.007045 | 0.00226  | 0.007424 |
| CHP     | 0.585077 | 3.648898 | 0.00033  | 0.00145  | 0.000331 | 0.001455 |
| CHPT1   | -0.72758 | -2.19369 | 0.029314 | 0.063492 | 0.028189 | 0.061422 |
| CHRD2   | -0.50282 | -1.27753 | 0.202775 | 0.307328 | 0.199299 | 0.30324  |
| CHRNA10 | 0.51156  | 6.713315 | 1.62E-10 | 4.29E-09 | 5.50E-10 | 1.24E-08 |
| CHST10  | 0.803859 | 5.759279 | 2.85E-08 | 3.97E-07 | 3.13E-08 | 4.33E-07 |
| CHST13  | 0.563665 | 3.212886 | 0.001513 | 0.005268 | 0.001494 | 0.00522  |
| CIB1    | -0.53642 | -3.03355 | 0.00271  | 0.008624 | 0.002676 | 0.008534 |
| CIB2    | 0.37517  | 1.738482 | 0.083538 | 0.151185 | 0.082353 | 0.149848 |
| CILP    | 2.880939 | 6.221836 | 2.48E-09 | 4.68E-08 | 1.83E-09 | 3.57E-08 |
| CIRBP   | -0.23369 | -1.2513  | 0.212165 | 0.317631 | 0.211258 | 0.316416 |
| CIT     | 0.275843 | 1.676754 | 0.095024 | 0.168979 | 0.09506  | 0.168597 |
| CITED2  | -0.44841 | -1.60069 | 0.110893 | 0.190079 | 0.108728 | 0.187119 |
| CIZ1    | -0.52504 | -3.31852 | 0.00106  | 0.003873 | 0.001069 | 0.003901 |
| CKAP2   | 0.173399 | 1.089725 | 0.277037 | 0.388216 | 0.277418 | 0.3885   |
| CKAP4   | 0.404973 | 1.895142 | 0.059397 | 0.115167 | 0.058447 | 0.113514 |
| CKB     | -0.01116 | -0.02748 | 0.978099 | 0.986072 | 0.977928 | 0.985899 |
| CKLF    | -0.26887 | -1.36225 | 0.174525 | 0.272605 | 0.173337 | 0.27075  |
| CKS1B   | 0.047044 | 0.263238 | 0.792616 | 0.85033  | 0.792356 | 0.850634 |
| CKS2    | 1.102785 | 4.359491 | 2.01E-05 | 0.000133 | 1.81E-05 | 0.000122 |
| CLASP1  | 0.365073 | 3.380049 | 0.000859 | 0.00327  | 0.00099  | 0.003648 |
| CLCN2   | 0.098541 | 0.533865 | 0.593979 | 0.69538  | 0.593319 | 0.695018 |
| CLCN3   | 0.648772 | 2.699327 | 0.007493 | 0.020221 | 0.007201 | 0.019619 |
| CLCN4   | -0.42829 | -1.45217 | 0.147893 | 0.238783 | 0.145304 | 0.235249 |
| CLCN5   | 1.661198 | 6.513226 | 5.01E-10 | 1.14E-08 | 3.98E-10 | 9.51E-09 |
| CLCN6   | 0.516082 | 3.609981 | 0.00038  | 0.001632 | 0.000395 | 0.001685 |
| CLCN7   | 0.468375 | 4.371142 | 1.91E-05 | 0.000128 | 2.40E-05 | 0.000155 |
| CLDN1   | 0.763787 | 1.832679 | 0.068214 | 0.129329 | 0.066054 | 0.125639 |

|         |          |          |          |          |          |          |
|---------|----------|----------|----------|----------|----------|----------|
| CLDN2   | 0.846368 | 1.506673 | 0.133342 | 0.220317 | 0.130034 | 0.215728 |
| CLDN3   | -1.19596 | -2.29993 | 0.022398 | 0.050979 | 0.021285 | 0.048752 |
| CLDN4   | 0.647133 | 3.0638   | 0.002461 | 0.007982 | 0.002371 | 0.007725 |
| CLDN7   | 0.651528 | 2.134299 | 0.033935 | 0.071522 | 0.032766 | 0.069463 |
| CLIC1   | 0.026741 | 0.192446 | 0.847572 | 0.889141 | 0.848167 | 0.889619 |
| CLIC2   | 0.984212 | 3.842753 | 0.00016  | 0.000787 | 0.000147 | 0.000735 |
| CLK2    | 0.466897 | 3.451457 | 0.00067  | 0.002667 | 0.000706 | 0.002787 |
| CLN3    | 0.157668 | 0.891904 | 0.373428 | 0.490121 | 0.372894 | 0.489144 |
| CLN5    | 0.52539  | 2.971299 | 0.003298 | 0.010178 | 0.003259 | 0.010076 |
| CLNS1A  | 0.148342 | 0.889526 | 0.374701 | 0.491514 | 0.374652 | 0.491176 |
| CLOCK   | 0.435101 | 4.452198 | 1.36E-05 | 9.48E-05 | 1.86E-05 | 0.000124 |
| CLPP    | -0.20636 | -1.68461 | 0.093496 | 0.166703 | 0.096009 | 0.169895 |
| CLPX    | 0.712205 | 5.076041 | 8.25E-07 | 8.18E-06 | 8.90E-07 | 8.75E-06 |
| CLSPN   | 0.062402 | 0.736352 | 0.462308 | 0.577271 | 0.473734 | 0.587636 |
| CLSTN1  | -0.12549 | -0.75291 | 0.452315 | 0.566902 | 0.452275 | 0.566852 |
| CLSTN2  | 1.106011 | 5.671747 | 4.46E-08 | 5.96E-07 | 4.06E-08 | 5.49E-07 |
| CLTA    | 0.45096  | 3.253978 | 0.001319 | 0.004679 | 0.001375 | 0.004862 |
| CLTB    | 0.066712 | 0.325039 | 0.745463 | 0.818043 | 0.744668 | 0.817552 |
| CLTC    | -0.04476 | -0.54422 | 0.586849 | 0.68972  | 0.597142 | 0.697264 |
| CMAS    | -0.74333 | -5.97615 | 9.22E-09 | 1.44E-07 | 1.13E-08 | 1.74E-07 |
| CMIP    | 0.916654 | 5.195605 | 4.68E-07 | 4.84E-06 | 4.49E-07 | 4.69E-06 |
| CNDP2   | 0.428835 | 3.069546 | 0.002416 | 0.007847 | 0.002503 | 0.008053 |
| CNGB1   | 0.031138 | 0.224465 | 0.822606 | 0.872545 | 0.823302 | 0.87289  |
| CNIH    | 0.464213 | 3.368542 | 0.000893 | 0.003358 | 0.000935 | 0.003477 |
| CNKSR1  | 0.857781 | 5.023575 | 1.05E-06 | 1.01E-05 | 1.03E-06 | 9.90E-06 |
| CNN1    | 0.071151 | 0.23285  | 0.816096 | 0.867795 | 0.8149   | 0.867088 |
| CNN2    | 0.188537 | 1.091089 | 0.276438 | 0.387723 | 0.276082 | 0.386992 |
| CNN3    | 0.17719  | 0.716231 | 0.474615 | 0.588728 | 0.472338 | 0.586453 |
| CNNM4   | -0.92743 | -4.16356 | 4.51E-05 | 0.000269 | 4.18E-05 | 0.000253 |
| CNOT1   | -0.43839 | -2.82421 | 0.005179 | 0.01487  | 0.005231 | 0.014974 |
| CNOT3   | 0.04141  | 0.254043 | 0.799701 | 0.856172 | 0.799769 | 0.856352 |
| CNOT6L  | -0.31064 | -1.24231 | 0.215456 | 0.321269 | 0.213052 | 0.318392 |
| CNOT8   | -0.44695 | -3.41121 | 0.000771 | 0.002982 | 0.000821 | 0.003145 |
| CNP     | 0.500551 | 3.320548 | 0.001053 | 0.003856 | 0.001074 | 0.00391  |
| CNTFR   | 0.25192  | 1.879298 | 0.061538 | 0.118634 | 0.062799 | 0.12062  |
| CNTN4   | 1.67953  | 6.383179 | 1.03E-09 | 2.16E-08 | 8.19E-10 | 1.76E-08 |
| CNTNAP1 | 0.68745  | 3.337031 | 0.000996 | 0.003673 | 0.000956 | 0.003539 |
| COASY   | 0.12331  | 0.555001 | 0.579463 | 0.683604 | 0.577894 | 0.682266 |
| COBL    | 0.37712  | 1.199471 | 0.231647 | 0.338433 | 0.228494 | 0.335601 |
| COBLL1  | 1.122677 | 6.103076 | 4.70E-09 | 7.87E-08 | 4.33E-09 | 7.38E-08 |
| COG2    | -0.28309 | -2.5503  | 0.011449 | 0.028915 | 0.01239  | 0.031009 |

|          |          |          |          |          |          |          |
|----------|----------|----------|----------|----------|----------|----------|
| COG5     | 0.229891 | 0.948094 | 0.344131 | 0.459671 | 0.341729 | 0.457065 |
| COL11A2  | 0.329683 | 1.783307 | 0.075928 | 0.141105 | 0.075383 | 0.140095 |
| COL13A1  | -0.02813 | -0.21336 | 0.831249 | 0.878791 | 0.832146 | 0.879037 |
| COL15A1  | 1.571456 | 5.561333 | 7.79E-08 | 9.77E-07 | 6.45E-08 | 8.23E-07 |
| COL16A1  | 0.863217 | 2.655398 | 0.008506 | 0.022511 | 0.008057 | 0.021504 |
| COL18A1  | 0.589564 | 3.231189 | 0.001424 | 0.005001 | 0.001396 | 0.004921 |
| COL1A2   | 0.955929 | 3.36894  | 0.000892 | 0.003357 | 0.000828 | 0.003161 |
| COL4A1   | 0.397915 | 1.943574 | 0.053234 | 0.105126 | 0.052463 | 0.103691 |
| COL4A2   | 0.423224 | 2.208847 | 0.028227 | 0.061619 | 0.027849 | 0.060852 |
| COL4A3   | -0.19894 | -2.00513 | 0.046185 | 0.092893 | 0.049811 | 0.099157 |
| COL4A3BP | 0.727622 | 4.88654  | 1.99E-06 | 1.72E-05 | 2.07E-06 | 1.78E-05 |
| COL4A4   | 0.021261 | 0.048804 | 0.96112  | 0.974178 | 0.960807 | 0.973861 |
| COL4A5   | 0.142562 | 0.626499 | 0.531643 | 0.641191 | 0.529844 | 0.639038 |
| COL4A6   | -0.29309 | -1.37569 | 0.17033  | 0.267547 | 0.168754 | 0.265621 |
| COL5A3   | 1.193669 | 6.398758 | 9.44E-10 | 2.01E-08 | 8.56E-10 | 1.83E-08 |
| COL6A1   | 0.302165 | 1.538218 | 0.125446 | 0.20982  | 0.124426 | 0.208034 |
| COL6A2   | 0.233779 | 1.733456 | 0.084429 | 0.152562 | 0.085887 | 0.155198 |
| COL7A1   | 1.101958 | 4.664355 | 5.40E-06 | 4.18E-05 | 4.85E-06 | 3.80E-05 |
| COL8A1   | -1.22396 | -4.16403 | 4.50E-05 | 0.000269 | 4.02E-05 | 0.000245 |
| COL9A1   | -0.12844 | -0.69657 | 0.486815 | 0.598804 | 0.486041 | 0.598165 |
| COL9A2   | 0.76646  | 4.360496 | 2.00E-05 | 0.000132 | 1.95E-05 | 0.000129 |
| COL9A3   | 0.041508 | 0.094526 | 0.924778 | 0.947752 | 0.924173 | 0.947342 |
| COLEC10  | 0.234063 | 1.841731 | 0.066873 | 0.127146 | 0.068633 | 0.130019 |
| COMMD10  | 0.218975 | 1.810228 | 0.071637 | 0.134732 | 0.073934 | 0.13812  |
| COMMD3   | 0.092798 | 0.532436 | 0.594966 | 0.696004 | 0.594645 | 0.695751 |
| COMP     | -0.87636 | -1.55355 | 0.121741 | 0.204425 | 0.118563 | 0.200016 |
| COMT     | -0.14392 | -1.12032 | 0.263812 | 0.373919 | 0.26675  | 0.376834 |
| COPB2    | 0.134785 | 1.495213 | 0.136305 | 0.22392  | 0.144884 | 0.234731 |
| COPG2    | -0.14733 | -0.93001 | 0.353396 | 0.468537 | 0.353825 | 0.469369 |
| COPS3    | -0.03052 | -0.19246 | 0.847561 | 0.889141 | 0.847695 | 0.889522 |
| COPS4    | 0.221757 | 2.911575 | 0.00397  | 0.011914 | 0.005317 | 0.015191 |
| COPS5    | 0.137468 | 0.792735 | 0.428794 | 0.544538 | 0.428429 | 0.544398 |
| COPS6    | 0.295897 | 1.825787 | 0.06925  | 0.131029 | 0.069357 | 0.131126 |
| COPS7A   | -0.07542 | -0.48501 | 0.628155 | 0.723787 | 0.628599 | 0.724121 |
| COPS8    | 0.798082 | 6.089711 | 5.05E-09 | 8.25E-08 | 5.91E-09 | 9.67E-08 |
| COPZ1    | -0.0003  | -0.00236 | 0.998119 | 0.998969 | 0.99813  | 0.998981 |
| COPZ2    | 0.809922 | 6.666878 | 2.11E-10 | 5.49E-09 | 2.76E-10 | 6.92E-09 |
| COQ7     | 0.212362 | 1.169332 | 0.243547 | 0.352967 | 0.242813 | 0.351577 |
| CORO1A   | -1.80345 | -10.1713 | 3.89E-20 | 1.02E-17 | 3.13E-20 | 8.16E-18 |
| CORO1C   | 0.00845  | 0.053172 | 0.957643 | 0.971516 | 0.957679 | 0.971529 |
| CORO2A   | -0.533   | -1.85785 | 0.064539 | 0.123507 | 0.062881 | 0.120727 |

|         |          |          |          |          |          |          |
|---------|----------|----------|----------|----------|----------|----------|
| COX11   | 0.507332 | 2.85019  | 0.004788 | 0.013935 | 0.004731 | 0.013786 |
| COX15   | 0.418198 | 2.353199 | 0.019503 | 0.0454   | 0.019346 | 0.045102 |
| COX17   | -0.56719 | -3.86236 | 0.000148 | 0.000742 | 0.000153 | 0.000765 |
| COX5A   | -0.07983 | -0.59522 | 0.552315 | 0.65902  | 0.554264 | 0.661345 |
| COX5B   | -0.40156 | -3.10628 | 0.002146 | 0.007089 | 0.002275 | 0.007465 |
| COX6A1  | -0.22814 | -2.22234 | 0.027287 | 0.05993  | 0.029591 | 0.064003 |
| COX6B1  | -0.087   | -0.56452 | 0.57298  | 0.678169 | 0.573548 | 0.67884  |
| COX6C   | 0.119072 | 0.868426 | 0.386116 | 0.503118 | 0.388153 | 0.504513 |
| COX7A1  | -0.1993  | -1.09184 | 0.27611  | 0.387494 | 0.275326 | 0.386182 |
| COX7A2  | 0.501755 | 3.729304 | 0.000245 | 0.001129 | 0.000261 | 0.001191 |
| COX7C   | 0.04366  | 0.398646 | 0.690544 | 0.774893 | 0.694024 | 0.777981 |
| COX8A   | -0.02532 | -0.18138 | 0.856234 | 0.896281 | 0.856779 | 0.896851 |
| CP      | -0.32549 | -0.56985 | 0.569369 | 0.674914 | 0.566041 | 0.671647 |
| CPA3    | 2.614837 | 5.40907  | 1.66E-07 | 1.94E-06 | 1.31E-07 | 1.55E-06 |
| CPD     | 0.935009 | 3.534828 | 0.000498 | 0.00207  | 0.000462 | 0.001939 |
| CPM     | 1.390658 | 4.449823 | 1.37E-05 | 9.53E-05 | 1.20E-05 | 8.54E-05 |
| CPNE3   | 0.073173 | 0.310727 | 0.756305 | 0.826028 | 0.755192 | 0.825251 |
| CPNE6   | 0.328583 | 3.1085   | 0.002131 | 0.007048 | 0.002432 | 0.007887 |
| CPNE8   | 1.523382 | 5.362789 | 2.08E-07 | 2.35E-06 | 1.74E-07 | 2.01E-06 |
| CPS1    | 3.188931 | 5.87325  | 1.58E-08 | 2.30E-07 | 1.19E-08 | 1.80E-07 |
| CPSF1   | -0.51845 | -2.59438 | 0.010119 | 0.026146 | 0.009896 | 0.025654 |
| CPSF2   | 0.475357 | 2.879808 | 0.004376 | 0.012951 | 0.004373 | 0.012903 |
| CPSF4   | 0.653252 | 4.152091 | 4.73E-05 | 0.000281 | 4.78E-05 | 0.000282 |
| CPSF6   | 0.146524 | 0.64161  | 0.521801 | 0.632922 | 0.519961 | 0.631285 |
| CPT1A   | 0.834443 | 3.641414 | 0.000339 | 0.001485 | 0.000318 | 0.001405 |
| CPVL    | 1.179276 | 2.731433 | 0.006822 | 0.01866  | 0.006388 | 0.017704 |
| CRABP2  | 1.629122 | 3.863195 | 0.000148 | 0.000742 | 0.000131 | 0.000668 |
| CRADD   | -0.57782 | -4.1108  | 5.58E-05 | 0.000323 | 5.90E-05 | 0.000336 |
| CREB3L4 | 0.020744 | 0.084677 | 0.932596 | 0.953907 | 0.932255 | 0.953679 |
| CREB5   | 0.795069 | 2.862484 | 0.004613 | 0.013517 | 0.00437  | 0.012903 |
| CREBBP  | 0.918705 | 8.210392 | 1.93E-14 | 1.65E-12 | 3.20E-14 | 2.68E-12 |
| CREG1   | 0.544416 | 3.520772 | 0.000524 | 0.002156 | 0.000532 | 0.002189 |
| CRELD1  | 0.726097 | 3.904763 | 0.000126 | 0.000648 | 0.000122 | 0.00063  |
| CRHBP   | 0.310806 | 1.888676 | 0.060263 | 0.116558 | 0.060285 | 0.116505 |
| CRHR1   | 0.051767 | 0.50508  | 0.614013 | 0.711558 | 0.619251 | 0.716161 |
| CRIP1   | 0.076394 | 0.194969 | 0.845599 | 0.887853 | 0.844422 | 0.887077 |
| CRIP2   | 0.159118 | 0.639046 | 0.523464 | 0.633929 | 0.521301 | 0.631986 |
| CRIPT   | 0.776906 | 4.788335 | 3.10E-06 | 2.54E-05 | 3.10E-06 | 2.54E-05 |
| CRISP1  | -0.14474 | -2.17274 | 0.030878 | 0.066043 | 0.039188 | 0.080817 |
| CRTAP   | 0.916309 | 5.499757 | 1.06E-07 | 1.29E-06 | 1.04E-07 | 1.26E-06 |
| CRY1    | 0.776293 | 3.685696 | 0.000288 | 0.001292 | 0.000273 | 0.001241 |

|         |          |          |          |          |          |          |
|---------|----------|----------|----------|----------|----------|----------|
| CRYAB   | 0.104995 | 0.460947 | 0.645296 | 0.73991  | 0.643845 | 0.738247 |
| CRYBA4  | 0.394088 | 3.135937 | 0.001949 | 0.006544 | 0.002086 | 0.006919 |
| CRYBB1  | 0.304914 | 2.227499 | 0.026936 | 0.059269 | 0.027584 | 0.060468 |
| CRYM    | 1.061323 | 3.425549 | 0.000733 | 0.002888 | 0.000674 | 0.002696 |
| CRYZL1  | 0.283022 | 1.498974 | 0.135327 | 0.222642 | 0.134487 | 0.221399 |
| CS      | -0.13319 | -0.81363 | 0.416747 | 0.532548 | 0.416862 | 0.532695 |
| CSAD    | 1.082499 | 7.101912 | 1.72E-11 | 6.21E-10 | 1.77E-11 | 6.40E-10 |
| CSDA    | -0.15494 | -1.0485  | 0.295567 | 0.408779 | 0.296727 | 0.409316 |
| CSE1L   | 0.12102  | 0.688543 | 0.491843 | 0.603724 | 0.491403 | 0.603185 |
| CSF1R   | 0.488538 | 2.947886 | 0.003548 | 0.010793 | 0.003543 | 0.010773 |
| CSF2    | 0.302117 | 2.072867 | 0.03936  | 0.081102 | 0.039882 | 0.082105 |
| CSF2RB  | 0.415718 | 1.763041 | 0.079295 | 0.145597 | 0.077876 | 0.143649 |
| CSF3R   | 1.05162  | 4.782468 | 3.19E-06 | 2.59E-05 | 2.89E-06 | 2.38E-05 |
| CSNK1A1 | 0.409003 | 2.545737 | 0.011595 | 0.029214 | 0.011636 | 0.029346 |
| CSNK1G3 | 0.586189 | 3.713428 | 0.00026  | 0.001188 | 0.000262 | 0.001197 |
| CSNK2A1 | 0.214548 | 1.336337 | 0.182832 | 0.283414 | 0.183096 | 0.283729 |
| CSNK2A2 | 0.252106 | 1.932551 | 0.054587 | 0.107347 | 0.055952 | 0.109664 |
| CSNK2B  | -0.24487 | -1.7208  | 0.086706 | 0.156137 | 0.087737 | 0.157872 |
| CSPG4   | 0.712577 | 3.42124  | 0.000744 | 0.002912 | 0.000712 | 0.002809 |
| CSPG5   | 0.357443 | 2.039874 | 0.042569 | 0.086687 | 0.042355 | 0.086214 |
| CSRP1   | 0.641245 | 3.905927 | 0.000125 | 0.000646 | 0.000125 | 0.000644 |
| CSRP2   | 0.18898  | 0.610473 | 0.542184 | 0.650895 | 0.539482 | 0.648151 |
| CSRP2BP | 0.257423 | 1.534338 | 0.126396 | 0.21096  | 0.126303 | 0.21088  |
| CST3    | -0.01865 | -0.13245 | 0.894747 | 0.926076 | 0.895125 | 0.926467 |
| CST7    | -0.79155 | -3.75971 | 0.000219 | 0.001021 | 0.000207 | 0.000973 |
| CSTA    | -0.82922 | -1.9978  | 0.046981 | 0.094235 | 0.045262 | 0.091341 |
| CSTF1   | 0.561753 | 3.856747 | 0.000151 | 0.000757 | 0.000157 | 0.00078  |
| CSTF2   | 0.442702 | 2.610117 | 0.009679 | 0.02516  | 0.00964  | 0.025082 |
| CSTF3   | -0.73274 | -3.30375 | 0.001115 | 0.004031 | 0.001062 | 0.003881 |
| CTBP1   | -0.10568 | -0.58542 | 0.558869 | 0.665657 | 0.558301 | 0.665121 |
| CTDP1   | 0.204365 | 1.585318 | 0.114344 | 0.194504 | 0.116526 | 0.197644 |
| CTDSP2  | 0.741923 | 5.577529 | 7.19E-08 | 9.11E-07 | 8.15E-08 | 1.01E-06 |
| CTDSPL  | 0.096491 | 0.503233 | 0.615309 | 0.71274  | 0.614481 | 0.711871 |
| CTF1    | 0.798762 | 4.06688  | 6.66E-05 | 0.000375 | 6.34E-05 | 0.000356 |
| CTGF    | 0.742914 | 2.277542 | 0.023724 | 0.053317 | 0.022763 | 0.051708 |
| CTH     | 0.315148 | 0.931359 | 0.352698 | 0.467875 | 0.349268 | 0.465032 |
| CTNNA1  | 0.008807 | 0.045227 | 0.963968 | 0.975382 | 0.963876 | 0.975499 |
| CTNNAL1 | 0.659411 | 2.7412   | 0.00663  | 0.018329 | 0.006364 | 0.017666 |
| CTNNB1  | 0.000179 | 0.000563 | 0.999551 | 0.999764 | 0.999548 | 0.999761 |
| CTNND1  | 0.412545 | 2.641333 | 0.008856 | 0.023358 | 0.008927 | 0.023492 |
| CTNS    | 1.078198 | 6.317917 | 1.47E-09 | 2.93E-08 | 1.41E-09 | 2.83E-08 |



|          |          |          |          |          |          |          |
|----------|----------|----------|----------|----------|----------|----------|
| CTRL     | 0.070098 | 0.533764 | 0.594048 | 0.69538  | 0.596081 | 0.696911 |
| CTSC     | 0.047909 | 0.194988 | 0.845584 | 0.887853 | 0.844807 | 0.887283 |
| CTSD     | -0.14379 | -0.71447 | 0.475699 | 0.589641 | 0.474378 | 0.587968 |
| CTSE     | -1.35793 | -2.83437 | 0.005023 | 0.01451  | 0.004671 | 0.013645 |
| CTSF     | 0.947861 | 4.740407 | 3.85E-06 | 3.09E-05 | 3.58E-06 | 2.90E-05 |
| CTSG     | 1.333372 | 3.961497 | 0.000101 | 0.000535 | 8.99E-05 | 0.000484 |
| CTSH     | 0.724306 | 2.205967 | 0.028431 | 0.061949 | 0.027336 | 0.060037 |
| CTSK     | 0.801716 | 3.168703 | 0.001751 | 0.005942 | 0.001652 | 0.005566 |
| CTSL2    | 1.593576 | 4.063523 | 6.75E-05 | 0.000379 | 5.92E-05 | 0.000336 |
| CTSO     | 0.412556 | 2.039405 | 0.042616 | 0.086708 | 0.041975 | 0.085552 |
| CTSS     | 0.336035 | 1.449361 | 0.148674 | 0.239879 | 0.146819 | 0.237457 |
| CTSZ     | 1.134454 | 7.371211 | 3.47E-12 | 1.46E-10 | 3.54E-12 | 1.50E-10 |
| CTTN     | 1.13332  | 4.290558 | 2.68E-05 | 0.00017  | 2.40E-05 | 0.000155 |
| CUL1     | -0.22568 | -2.02939 | 0.043634 | 0.088397 | 0.046011 | 0.092692 |
| CUL2     | 0.448519 | 2.735094 | 0.00675  | 0.018531 | 0.006753 | 0.018562 |
| CUL4A    | -0.3502  | -1.35458 | 0.176955 | 0.275576 | 0.174572 | 0.272588 |
| CUL4B    | 1.341452 | 7.929443 | 1.13E-13 | 7.30E-12 | 1.05E-13 | 7.13E-12 |
| CUL5     | 0.759946 | 4.727745 | 4.07E-06 | 3.27E-05 | 4.09E-06 | 3.26E-05 |
| CUL7     | 0.057924 | 0.433606 | 0.665003 | 0.754409 | 0.666583 | 0.755926 |
| CWF19L2  | 0.872592 | 7.923108 | 1.18E-13 | 7.39E-12 | 1.97E-13 | 1.20E-11 |
| CXADR    | -0.20886 | -0.52902 | 0.59733  | 0.697503 | 0.594492 | 0.695745 |
| CXCL1    | 0.028829 | 0.058215 | 0.953631 | 0.969332 | 0.953243 | 0.969058 |
| CXCL10   | -1.37192 | -2.7892  | 0.005751 | 0.016167 | 0.005357 | 0.015273 |
| CXCL12   | 1.830196 | 5.710148 | 3.67E-08 | 4.97E-07 | 2.94E-08 | 4.09E-07 |
| CXCL14   | 0.403888 | 0.813691 | 0.41671  | 0.532548 | 0.412821 | 0.529113 |
| CXCL6    | 0.201971 | 0.349977 | 0.726694 | 0.804017 | 0.724427 | 0.802075 |
| CXCR6    | -0.24244 | -1.29146 | 0.197914 | 0.301619 | 0.19699  | 0.300601 |
| CXXC1    | -0.16656 | -1.20146 | 0.230876 | 0.337622 | 0.232732 | 0.339913 |
| CYB561   | 0.330457 | 2.056027 | 0.040971 | 0.083869 | 0.041077 | 0.084014 |
| CYB561D2 | 0.280136 | 1.48461  | 0.139092 | 0.227385 | 0.138245 | 0.22608  |
| CYBA     | -0.25966 | -1.93133 | 0.054739 | 0.1076   | 0.055893 | 0.109647 |
| CYBASC3  | 0.109635 | 0.757005 | 0.449865 | 0.564885 | 0.451175 | 0.565775 |
| CYC1     | -0.22955 | -1.22296 | 0.222664 | 0.329868 | 0.221713 | 0.328412 |
| CYCS     | 0.157793 | 0.580715 | 0.562032 | 0.668578 | 0.559733 | 0.666011 |
| CYFIP2   | -0.88257 | -3.37712 | 0.000867 | 0.003295 | 0.00081  | 0.003116 |
| CYorf15B | 1.118735 | 3.468084 | 0.000631 | 0.002541 | 0.000578 | 0.002355 |
| CYP27A1  | 0.007274 | 0.036281 | 0.971092 | 0.980479 | 0.971007 | 0.980394 |
| CYP27B1  | 1.532619 | 4.373891 | 1.89E-05 | 0.000126 | 1.64E-05 | 0.000111 |
| CYP2B6   | 0.297855 | 0.965551 | 0.335339 | 0.450462 | 0.332119 | 0.447009 |
| CYP2E1   | -0.46729 | -1.15504 | 0.24934  | 0.358548 | 0.24565  | 0.354376 |
| CYP2J2   | -0.32728 | -0.95951 | 0.338362 | 0.453595 | 0.334905 | 0.450115 |

|         |          |          |          |          |          |          |
|---------|----------|----------|----------|----------|----------|----------|
| CYP2S1  | -0.51705 | -1.40348 | 0.161895 | 0.256561 | 0.158768 | 0.252798 |
| CYP39A1 | 0.27969  | 0.775787 | 0.438716 | 0.554739 | 0.435328 | 0.550752 |
| CYP3A4  | 0.596194 | 2.900787 | 0.004104 | 0.012238 | 0.00398  | 0.011953 |
| CYP3A5  | -1.88642 | -4.15231 | 4.72E-05 | 0.000281 | 4.09E-05 | 0.000248 |
| CYP4B1  | -0.12835 | -0.30723 | 0.758964 | 0.827833 | 0.757113 | 0.826581 |
| CYP4F11 | 0.118332 | 0.278691 | 0.780746 | 0.842016 | 0.779042 | 0.840565 |
| CYP4F8  | -0.33288 | -2.30333 | 0.022203 | 0.050651 | 0.022581 | 0.05137  |
| CYP51A1 | 0.642612 | 1.776311 | 0.077076 | 0.14279  | 0.074902 | 0.139477 |
| CYP7B1  | -0.28755 | -1.30499 | 0.193272 | 0.296372 | 0.191466 | 0.29389  |
| CYR61   | 1.191698 | 3.398912 | 0.000804 | 0.003089 | 0.000736 | 0.002884 |
| CYYR1   | 1.831937 | 10.70542 | 9.15E-22 | 3.31E-19 | 7.48E-22 | 2.70E-19 |
| D4S234E | 0.640707 | 3.195443 | 0.001603 | 0.005548 | 0.00155  | 0.00537  |
| DAB2    | 0.441566 | 1.921632 | 0.055956 | 0.10958  | 0.054856 | 0.107966 |
| DACH1   | 0.831534 | 1.914197 | 0.056904 | 0.111114 | 0.054937 | 0.108079 |
| DACT1   | 0.103751 | 0.347055 | 0.728885 | 0.805303 | 0.727193 | 0.803938 |
| DAD1    | 0.629295 | 4.726677 | 4.09E-06 | 3.28E-05 | 4.52E-06 | 3.57E-05 |
| DAG1    | 0.996281 | 5.652878 | 4.91E-08 | 6.52E-07 | 4.68E-08 | 6.21E-07 |
| DAP     | 0.128197 | 0.643228 | 0.520752 | 0.632281 | 0.519557 | 0.630987 |
| DAPK1   | 0.525322 | 2.21633  | 0.027703 | 0.060615 | 0.02696  | 0.059377 |
| DAPK2   | 0.326966 | 1.745887 | 0.082239 | 0.149526 | 0.081613 | 0.148848 |
| DAPK3   | 0.009838 | 0.045517 | 0.963737 | 0.975382 | 0.963598 | 0.975428 |
| DAPP1   | 0.127816 | 0.55149  | 0.581863 | 0.685746 | 0.58014  | 0.68423  |
| DARS    | 0.633362 | 4.367129 | 1.95E-05 | 0.000129 | 2.04E-05 | 0.000135 |
| DAXX    | -0.15609 | -1.39177 | 0.165409 | 0.261144 | 0.170029 | 0.267181 |
| DAZAP1  | 0.730268 | 5.730336 | 3.31E-08 | 4.55E-07 | 3.92E-08 | 5.32E-07 |
| DBC1    | -0.00534 | -0.04531 | 0.963904 | 0.975382 | 0.964228 | 0.975646 |
| DBI     | -0.0086  | -0.05247 | 0.958203 | 0.97182  | 0.958213 | 0.971651 |
| DBT     | 0.866429 | 5.040383 | 9.75E-07 | 9.48E-06 | 9.49E-07 | 9.18E-06 |
| DCBLD2  | 1.041824 | 3.986439 | 9.15E-05 | 0.000492 | 8.34E-05 | 0.000454 |
| DCDC2   | -0.08723 | -0.31902 | 0.750019 | 0.8217   | 0.748587 | 0.820322 |
| DCI     | -0.41201 | -2.15565 | 0.032206 | 0.068524 | 0.0318   | 0.067814 |
| DCK     | 0.131429 | 0.729218 | 0.466651 | 0.581766 | 0.466016 | 0.581129 |
| DCLRE1C | 0.943297 | 4.948279 | 1.50E-06 | 1.35E-05 | 1.40E-06 | 1.28E-05 |
| DCP1A   | 1.019019 | 6.552616 | 4.02E-10 | 9.44E-09 | 4.08E-10 | 9.69E-09 |
| DCP2    | 0.46264  | 3.000223 | 0.003012 | 0.009442 | 0.003049 | 0.009508 |
| DCT     | 0.13145  | 1.750533 | 0.081433 | 0.148462 | 0.092348 | 0.164845 |
| DCTD    | 0.023258 | 0.126558 | 0.899407 | 0.929467 | 0.899235 | 0.929289 |
| DCTN1   | -0.41579 | -2.5398  | 0.011788 | 0.029644 | 0.011798 | 0.029665 |
| DCTN2   | 1.025139 | 7.534491 | 1.29E-12 | 5.96E-11 | 1.51E-12 | 6.83E-11 |
| DCTN6   | 0.297011 | 1.94161  | 0.053473 | 0.105465 | 0.053845 | 0.106155 |
| DCX     | 0.579325 | 1.563508 | 0.119384 | 0.201184 | 0.116626 | 0.197742 |

|        |          |          |          |          |          |          |
|--------|----------|----------|----------|----------|----------|----------|
| DDAH1  | -0.55787 | -2.67928 | 0.007941 | 0.021267 | 0.007725 | 0.020753 |
| DDB2   | -0.51539 | -2.2468  | 0.025654 | 0.056929 | 0.024995 | 0.055755 |
| DDC    | -0.38611 | -1.08981 | 0.277002 | 0.388216 | 0.273488 | 0.384087 |
| DDO    | 0.45815  | 2.827862 | 0.005122 | 0.014752 | 0.005135 | 0.014744 |
| DDR2   | 0.548646 | 2.945783 | 0.003571 | 0.010857 | 0.003503 | 0.010684 |
| DDT    | -0.19426 | -0.92219 | 0.357448 | 0.472722 | 0.355741 | 0.47098  |
| DDX1   | 0.007787 | 0.064558 | 0.948585 | 0.966056 | 0.949007 | 0.966277 |
| DDX18  | 0.177543 | 1.324752 | 0.18664  | 0.288272 | 0.188798 | 0.290744 |
| DDX20  | 0.442721 | 2.870995 | 0.004495 | 0.013246 | 0.004547 | 0.013345 |
| DDX21  | 0.311103 | 1.87518  | 0.062105 | 0.11953  | 0.062088 | 0.119449 |
| DDX23  | 0.436267 | 3.445818 | 0.000683 | 0.002713 | 0.000737 | 0.002888 |
| DDX24  | 0.419616 | 3.414932 | 0.000761 | 0.002957 | 0.00083  | 0.003167 |
| DDX28  | 0.308074 | 3.000059 | 0.003013 | 0.009442 | 0.003453 | 0.010553 |
| DDX3X  | 0.086312 | 0.579909 | 0.562575 | 0.669054 | 0.563455 | 0.669957 |
| DDX51  | -0.09932 | -0.75176 | 0.453004 | 0.567614 | 0.455412 | 0.570167 |
| DDX52  | 0.284308 | 1.227072 | 0.221119 | 0.327739 | 0.219013 | 0.325264 |
| DDX55  | 0.295648 | 1.605266 | 0.109883 | 0.188761 | 0.109246 | 0.187873 |
| DDX56  | -0.03307 | -0.29143 | 0.771003 | 0.83584  | 0.773328 | 0.837498 |
| DDX58  | 0.114721 | 0.575974 | 0.565227 | 0.671397 | 0.564116 | 0.670378 |
| DDX6   | 0.346331 | 2.013918 | 0.045247 | 0.091349 | 0.045093 | 0.091078 |
| DEAF1  | -0.081   | -0.70869 | 0.479274 | 0.592212 | 0.483743 | 0.596274 |
| DECR1  | -0.06786 | -0.35634 | 0.721929 | 0.800251 | 0.721331 | 0.800344 |
| DEDD   | -0.58265 | -4.17082 | 4.38E-05 | 0.000263 | 4.65E-05 | 0.000276 |
| DEFB1  | -1.41187 | -2.32546 | 0.020966 | 0.048258 | 0.019873 | 0.046124 |
| DEK    | 0.441157 | 2.832492 | 0.005052 | 0.014575 | 0.005099 | 0.014675 |
| DEPDC5 | 0.235057 | 1.814962 | 0.070904 | 0.133781 | 0.07256  | 0.135923 |
| DEPDC6 | 0.058493 | 0.266526 | 0.790086 | 0.848961 | 0.789265 | 0.848283 |
| DERL3  | -0.49942 | -2.13273 | 0.034065 | 0.071763 | 0.03323  | 0.070226 |
| DET1   | 0.263363 | 1.152014 | 0.250577 | 0.359827 | 0.248478 | 0.357687 |
| DEXI   | -0.0365  | -0.20559 | 0.837303 | 0.881964 | 0.837115 | 0.882161 |
| DFFA   | 0.300809 | 1.859998 | 0.064233 | 0.123021 | 0.064345 | 0.123086 |
| DFNA5  | 1.573491 | 4.357364 | 2.03E-05 | 0.000133 | 1.76E-05 | 0.000119 |
| DGCR14 | 0.503543 | 5.340844 | 2.32E-07 | 2.60E-06 | 3.74E-07 | 3.95E-06 |
| DGCR2  | 0.885582 | 6.895433 | 5.72E-11 | 1.73E-09 | 7.05E-11 | 2.11E-09 |
| DGCR5  | -0.02048 | -0.17921 | 0.857938 | 0.897142 | 0.859369 | 0.898456 |
| DGKA   | -0.72517 | -3.339   | 0.000989 | 0.003652 | 0.000943 | 0.003499 |
| DGKD   | 0.374442 | 2.110062 | 0.035993 | 0.075119 | 0.035762 | 0.074737 |
| DGKZ   | 0.647462 | 3.330402 | 0.001018 | 0.003742 | 0.000987 | 0.003643 |
| DGUOK  | -0.03368 | -0.20855 | 0.834997 | 0.880324 | 0.835082 | 0.880414 |
| DHCR7  | 0.082911 | 0.305771 | 0.760071 | 0.828463 | 0.758706 | 0.827551 |
| DHDH   | 0.804542 | 3.712842 | 0.00026  | 0.001189 | 0.000246 | 0.001135 |

|         |          |          |          |          |          |          |
|---------|----------|----------|----------|----------|----------|----------|
| DHFR    | 0.18713  | 0.908268 | 0.36474  | 0.480998 | 0.363163 | 0.479322 |
| DHODH   | 0.428355 | 3.537264 | 0.000494 | 0.002056 | 0.000545 | 0.00224  |
| DHPS    | -0.14829 | -0.92567 | 0.355641 | 0.471247 | 0.355962 | 0.47114  |
| DHRS3   | 0.016192 | 0.073638 | 0.941366 | 0.960426 | 0.94113  | 0.960337 |
| DHRS9   | -1.4007  | -2.63133 | 0.009112 | 0.023953 | 0.008538 | 0.022594 |
| DHRSX   | 0.320393 | 1.662698 | 0.09781  | 0.172887 | 0.09699  | 0.171438 |
| DHX29   | -0.05845 | -0.37436 | 0.708498 | 0.789459 | 0.708834 | 0.789459 |
| DHX30   | 0.626858 | 5.201267 | 4.55E-07 | 4.73E-06 | 5.51E-07 | 5.61E-06 |
| DHX34   | 0.173127 | 1.133106 | 0.258415 | 0.367488 | 0.259197 | 0.368489 |
| DHX8    | 0.154158 | 1.116788 | 0.265314 | 0.375483 | 0.267273 | 0.377232 |
| DHX9    | -0.14268 | -0.6739  | 0.501088 | 0.613791 | 0.499544 | 0.611899 |
| DICER1  | -0.11841 | -0.75771 | 0.449444 | 0.564658 | 0.449978 | 0.564725 |
| DIO2    | -0.0443  | -0.11615 | 0.907637 | 0.936119 | 0.906936 | 0.935396 |
| DKC1    | 0.330827 | 2.092175 | 0.03758  | 0.077941 | 0.037742 | 0.078421 |
| DKK3    | -0.12457 | -0.444   | 0.657482 | 0.748043 | 0.655526 | 0.74704  |
| DLC1    | 0.959926 | 3.308231 | 0.001098 | 0.003989 | 0.00102  | 0.003748 |
| DLD     | -0.26561 | -1.37013 | 0.172056 | 0.269825 | 0.170978 | 0.268391 |
| DLG1    | 0.135729 | 0.577156 | 0.564429 | 0.67092  | 0.562598 | 0.669251 |
| DLG3    | -0.79151 | -4.63895 | 6.04E-06 | 4.62E-05 | 5.92E-06 | 4.56E-05 |
| DLGAP4  | 0.508468 | 3.316614 | 0.001067 | 0.003893 | 0.001084 | 0.003937 |
| DLL1    | -0.2223  | -1.36913 | 0.172369 | 0.270209 | 0.172531 | 0.269759 |
| DLL3    | -0.01517 | -0.18048 | 0.856942 | 0.896622 | 0.860614 | 0.899263 |
| DLX4    | 0.372586 | 3.531547 | 0.000504 | 0.002089 | 0.000595 | 0.002417 |
| DLX5    | -0.18944 | -0.96228 | 0.336974 | 0.452275 | 0.335664 | 0.450363 |
| DMD     | 0.412517 | 3.320112 | 0.001055 | 0.003858 | 0.001141 | 0.00412  |
| DMPK    | -0.29529 | -1.49957 | 0.135171 | 0.222524 | 0.134106 | 0.221043 |
| DMTF1   | 0.175278 | 1.125313 | 0.261694 | 0.371589 | 0.262281 | 0.372198 |
| DMWD    | 0.753634 | 6.867247 | 6.73E-11 | 1.99E-09 | 1.03E-10 | 2.98E-09 |
| DNAI1   | 0.71213  | 7.876775 | 1.57E-13 | 9.73E-12 | 4.22E-13 | 2.30E-11 |
| DNAJA1  | 0.678697 | 3.788834 | 0.000196 | 0.000936 | 0.000191 | 0.000914 |
| DNAJA2  | -0.17108 | -1.11947 | 0.264172 | 0.374204 | 0.264956 | 0.375432 |
| DNAJA4  | 0.51301  | 2.762301 | 0.00623  | 0.017356 | 0.006127 | 0.017159 |
| DNAJB1  | -0.05897 | -0.22757 | 0.820192 | 0.871165 | 0.819215 | 0.870323 |
| DNAJB2  | 0.913512 | 6.155453 | 3.55E-09 | 6.23E-08 | 3.74E-09 | 6.66E-08 |
| DNAJB5  | 0.218922 | 1.256058 | 0.210439 | 0.315956 | 0.210031 | 0.314979 |
| DNAJB6  | 0.163318 | 0.737594 | 0.461554 | 0.576636 | 0.459717 | 0.574799 |
| DNAJB9  | 0.42179  | 1.812617 | 0.071267 | 0.134249 | 0.069965 | 0.132009 |
| DNAJC10 | -0.62842 | -3.4889  | 0.000587 | 0.002383 | 0.000575 | 0.002343 |
| DNAJC12 | -0.84593 | -1.82168 | 0.069874 | 0.13205  | 0.067604 | 0.128328 |
| DNAJC8  | 0.089107 | 0.712151 | 0.477133 | 0.589983 | 0.480213 | 0.593167 |
| DNAL4   | -0.34011 | -2.17264 | 0.030886 | 0.066043 | 0.031061 | 0.066418 |

|          |          |          |          |          |          |          |
|----------|----------|----------|----------|----------|----------|----------|
| DNALI1   | 0.992535 | 2.884161 | 0.004318 | 0.012821 | 0.004045 | 0.012116 |
| DNASE1   | 0.176051 | 1.214721 | 0.225786 | 0.332455 | 0.227111 | 0.334615 |
| DNASE1L1 | 0.038788 | 0.20067  | 0.841144 | 0.88482  | 0.84076  | 0.884614 |
| DNASE1L3 | 0.144367 | 0.545583 | 0.585911 | 0.689134 | 0.583779 | 0.687317 |
| DNM1     | -0.09721 | -0.55887 | 0.576824 | 0.681859 | 0.576504 | 0.680796 |
| DNM1L    | 0.029646 | 0.164091 | 0.869811 | 0.905251 | 0.869624 | 0.905054 |
| DNM3     | -0.11197 | -0.33554 | 0.737541 | 0.812169 | 0.735753 | 0.811175 |
| DNMT1    | 0.064605 | 0.383136 | 0.701992 | 0.784815 | 0.70191  | 0.784691 |
| DNMT3A   | 1.309298 | 8.39361  | 5.97E-15 | 5.97E-13 | 5.93E-15 | 5.93E-13 |
| DNMT3B   | 0.925348 | 3.890703 | 0.000133 | 0.00068  | 0.000123 | 0.000634 |
| DOCK1    | 0.158195 | 1.191884 | 0.234602 | 0.34222  | 0.237027 | 0.345155 |
| DOCK10   | -0.26708 | -2.35211 | 0.019558 | 0.045506 | 0.020835 | 0.047885 |
| DOCK11   | -0.26282 | -1.36351 | 0.174128 | 0.272346 | 0.173079 | 0.270435 |
| DOCK2    | -0.61951 | -5.89362 | 1.42E-08 | 2.10E-07 | 2.11E-08 | 3.03E-07 |
| DOCK3    | -0.062   | -0.30361 | 0.761712 | 0.829483 | 0.760979 | 0.829069 |
| DOCK5    | 0.000434 | 0.002777 | 0.997786 | 0.998969 | 0.997789 | 0.998956 |
| DOCK8    | 0.604669 | 3.663832 | 0.000312 | 0.001383 | 0.000311 | 0.001378 |
| DOK2     | 0.82073  | 5.49564  | 1.08E-07 | 1.31E-06 | 1.13E-07 | 1.36E-06 |
| DOK3     | 0.761639 | 6.291958 | 1.70E-09 | 3.29E-08 | 2.18E-09 | 4.16E-08 |
| DOM3Z    | -0.19255 | -1.16757 | 0.244257 | 0.353305 | 0.244301 | 0.353188 |
| DPAGT1   | 0.407091 | 2.221506 | 0.027345 | 0.060001 | 0.027075 | 0.059546 |
| DPF2     | 0.18381  | 1.25078  | 0.212356 | 0.317678 | 0.213508 | 0.318668 |
| DPM1     | 0.40388  | 2.813853 | 0.005343 | 0.015225 | 0.005478 | 0.015547 |
| DPP4     | -0.48223 | -1.02292 | 0.307478 | 0.42108  | 0.303502 | 0.416972 |
| DPP6     | -0.11396 | -0.59063 | 0.555383 | 0.662009 | 0.554422 | 0.661367 |
| DPP8     | -0.00473 | -0.03985 | 0.96825  | 0.978661 | 0.968528 | 0.978942 |
| DPT      | 1.291038 | 3.178507 | 0.001695 | 0.005794 | 0.001558 | 0.005381 |
| DPYD     | 0.512318 | 2.119821 | 0.035152 | 0.073494 | 0.034249 | 0.072119 |
| DPYSL2   | 0.384754 | 1.573861 | 0.11697  | 0.198397 | 0.115123 | 0.195829 |
| DPYSL3   | 0.774785 | 2.742794 | 0.006598 | 0.018264 | 0.00627  | 0.017478 |
| DPYSL4   | -0.08183 | -0.49126 | 0.623735 | 0.720107 | 0.623711 | 0.719726 |
| DRAP1    | -0.64741 | -4.48939 | 1.16E-05 | 8.23E-05 | 1.22E-05 | 8.65E-05 |
| DRG1     | 0.104496 | 0.814259 | 0.416385 | 0.532375 | 0.419272 | 0.534638 |
| DRP2     | -0.39054 | -2.5537  | 0.011341 | 0.028735 | 0.011464 | 0.029    |
| DSCR3    | 0.118158 | 0.980289 | 0.32803  | 0.442775 | 0.332013 | 0.446995 |
| DSG2     | 1.773444 | 4.008187 | 8.40E-05 | 0.000458 | 7.35E-05 | 0.000406 |
| DSG3     | -1.75952 | -3.41692 | 0.000755 | 0.002944 | 0.000681 | 0.002719 |
| DSP      | 0.291312 | 0.874701 | 0.382699 | 0.500149 | 0.379343 | 0.495943 |
| DST      | 0.536278 | 2.210168 | 0.028133 | 0.061472 | 0.027351 | 0.060041 |
| DSTN     | 0.133836 | 0.985741 | 0.325353 | 0.439919 | 0.327555 | 0.442261 |
| DTNB     | 0.230183 | 2.865814 | 0.004567 | 0.01343  | 0.005861 | 0.016481 |

|          |          |          |          |          |          |          |
|----------|----------|----------|----------|----------|----------|----------|
| DTX1     | 0.859028 | 4.449997 | 1.37E-05 | 9.53E-05 | 1.30E-05 | 9.10E-05 |
| DUSP1    | 0.345528 | 1.160324 | 0.247186 | 0.356045 | 0.244134 | 0.353055 |
| DUSP10   | -0.00351 | -0.01203 | 0.990409 | 0.99433  | 0.990348 | 0.994345 |
| DUSP12   | -0.06574 | -0.44555 | 0.656366 | 0.747316 | 0.657156 | 0.747949 |
| DUSP18   | 0.654567 | 4.440567 | 1.43E-05 | 9.85E-05 | 1.48E-05 | 0.000103 |
| DUSP2    | -0.40837 | -1.42435 | 0.155774 | 0.249281 | 0.153202 | 0.245835 |
| DUSP3    | 0.824775 | 3.96467  | 9.97E-05 | 0.00053  | 9.41E-05 | 0.000503 |
| DUSP4    | 0.660364 | 1.828191 | 0.068888 | 0.130448 | 0.066849 | 0.127049 |
| DUSP5    | 0.074547 | 0.241692 | 0.809246 | 0.8631   | 0.807997 | 0.862115 |
| DUSP6    | 0.828864 | 2.799192 | 0.005582 | 0.015787 | 0.005281 | 0.015099 |
| DUT      | 0.222882 | 1.2989   | 0.195351 | 0.298876 | 0.195069 | 0.298348 |
| DVL2     | 0.131895 | 1.309083 | 0.191884 | 0.294821 | 0.198856 | 0.302859 |
| DVL3     | 0.657172 | 4.926375 | 1.66E-06 | 1.47E-05 | 1.84E-06 | 1.62E-05 |
| DYM      | -0.55414 | -3.95852 | 0.000102 | 0.00054  | 0.000108 | 0.000565 |
| DYRK1B   | 0.194427 | 1.570879 | 0.117661 | 0.199273 | 0.120349 | 0.202666 |
| DYRK2    | 0.201352 | 0.824839 | 0.410365 | 0.526683 | 0.408007 | 0.523943 |
| DYRK3    | 0.844483 | 8.039806 | 5.67E-14 | 4.17E-12 | 1.06E-13 | 7.13E-12 |
| DYRK4    | -0.10616 | -0.59971 | 0.54932  | 0.65708  | 0.548868 | 0.656074 |
| DYSF     | 0.889322 | 5.186562 | 4.89E-07 | 5.04E-06 | 4.75E-07 | 4.94E-06 |
| DYX1C1   | 0.371401 | 1.222654 | 0.22278  | 0.329889 | 0.219742 | 0.326006 |
| E2F4     | 0.367801 | 4.60959  | 6.87E-06 | 5.17E-05 | 1.23E-05 | 8.71E-05 |
| EBI3     | -0.24722 | -1.1682  | 0.244001 | 0.353305 | 0.2423   | 0.351051 |
| EBNA1BP2 | 0.619095 | 3.415158 | 0.00076  | 0.002957 | 0.000744 | 0.002909 |
| ECE1     | 0.887477 | 7.75265  | 3.40E-13 | 1.95E-11 | 5.21E-13 | 2.69E-11 |
| ECE2     | -0.04072 | -0.35507 | 0.722883 | 0.800751 | 0.725548 | 0.80256  |
| ECEL1    | 1.65402  | 8.019902 | 6.43E-14 | 4.60E-12 | 5.11E-14 | 3.90E-12 |
| ECH1     | 0.202336 | 0.628661 | 0.530229 | 0.640143 | 0.527395 | 0.637048 |
| ECHDC1   | 0.260389 | 1.3767   | 0.170017 | 0.26734  | 0.16909  | 0.26606  |
| ECHDC2   | 0.282795 | 2.093546 | 0.037457 | 0.077828 | 0.038337 | 0.079342 |
| ECM1     | 0.421445 | 1.440281 | 0.151222 | 0.243239 | 0.148629 | 0.239724 |
| ECM2     | 1.005094 | 5.794553 | 2.38E-08 | 3.38E-07 | 2.28E-08 | 3.24E-07 |
| EDA      | 0.205972 | 2.483166 | 0.013776 | 0.033988 | 0.01648  | 0.039317 |
| EDAR     | -0.41905 | -1.3651  | 0.173629 | 0.271838 | 0.170781 | 0.268183 |
| EDN1     | 0.475955 | 1.240065 | 0.216284 | 0.322403 | 0.212788 | 0.318099 |
| EDN3     | -0.20226 | -0.57436 | 0.566318 | 0.672485 | 0.563481 | 0.669957 |
| EDNRA    | 0.903469 | 2.820036 | 0.005244 | 0.015039 | 0.00494  | 0.014278 |
| EDNRB    | 1.526726 | 4.668074 | 5.31E-06 | 4.14E-05 | 4.55E-06 | 3.59E-05 |
| EEA1     | 2.157846 | 10.41164 | 7.25E-21 | 2.13E-18 | 4.89E-21 | 1.53E-18 |
| EED      | 0.345315 | 1.888381 | 0.060303 | 0.116587 | 0.059867 | 0.115792 |
| EEF1D    | -0.01234 | -0.07121 | 0.943295 | 0.962051 | 0.943252 | 0.961956 |
| EEF1E1   | -0.1787  | -1.21375 | 0.226156 | 0.332686 | 0.227306 | 0.334743 |

|          |          |          |          |          |          |          |
|----------|----------|----------|----------|----------|----------|----------|
| EEF2     | 0.298986 | 2.720776 | 0.007039 | 0.019211 | 0.007714 | 0.020741 |
| EFEMP1   | 0.950682 | 2.53642  | 0.011899 | 0.029859 | 0.01127  | 0.028585 |
| EFEMP2   | 0.252349 | 2.17416  | 0.03077  | 0.065915 | 0.032375 | 0.068851 |
| EFHA1    | 0.370031 | 1.767579 | 0.07853  | 0.144685 | 0.077486 | 0.143099 |
| EFHD1    | 0.851097 | 3.088559 | 0.002273 | 0.007449 | 0.002137 | 0.007072 |
| EFNA1    | 0.578889 | 2.243465 | 0.025872 | 0.05725  | 0.02506  | 0.055848 |
| EFNB1    | -0.32309 | -2.24847 | 0.025547 | 0.056728 | 0.025985 | 0.057582 |
| EFNB2    | 0.20679  | 0.713664 | 0.476199 | 0.589641 | 0.473419 | 0.587399 |
| EFNB3    | 0.900863 | 6.315942 | 1.49E-09 | 2.95E-08 | 1.62E-09 | 3.23E-08 |
| EFS      | 1.376008 | 10.09938 | 6.41E-20 | 1.59E-17 | 7.69E-20 | 1.90E-17 |
| EFTUD1   | -0.12507 | -0.75362 | 0.451889 | 0.56667  | 0.451885 | 0.566514 |
| EGFR     | 0.982841 | 4.204353 | 3.82E-05 | 0.000235 | 3.51E-05 | 0.000217 |
| EGLN1    | 0.875678 | 5.009511 | 1.13E-06 | 1.07E-05 | 1.09E-06 | 1.04E-05 |
| EGLN3    | -0.50981 | -1.34946 | 0.178588 | 0.277568 | 0.17531  | 0.273469 |
| EGR1     | 1.353301 | 4.89065  | 1.95E-06 | 1.69E-05 | 1.69E-06 | 1.51E-05 |
| EGR3     | 2.01229  | 5.588608 | 6.80E-08 | 8.68E-07 | 5.41E-08 | 7.13E-07 |
| EHD1     | 0.121324 | 0.77888  | 0.436895 | 0.553069 | 0.437466 | 0.553308 |
| EHD2     | 0.546846 | 3.4699   | 0.000627 | 0.002528 | 0.000633 | 0.002553 |
| EHD4     | -0.41302 | -2.65674 | 0.008474 | 0.022437 | 0.008548 | 0.02261  |
| EHF      | -0.39189 | -1.16744 | 0.244307 | 0.353305 | 0.240969 | 0.349661 |
| EHMT1    | 0.445163 | 2.285237 | 0.023261 | 0.05256  | 0.022899 | 0.051907 |
| EIF1AX   | 0.29304  | 1.373953 | 0.170867 | 0.268139 | 0.169284 | 0.266188 |
| EIF2AK2  | 0.808226 | 6.649902 | 2.33E-10 | 5.94E-09 | 3.03E-10 | 7.54E-09 |
| EIF2AK4  | 0.745847 | 3.677485 | 0.000297 | 0.001326 | 0.000283 | 0.001272 |
| EIF2B2   | -0.11579 | -0.74574 | 0.456631 | 0.57146  | 0.457222 | 0.572137 |
| EIF2B5   | 0.42531  | 3.040829 | 0.002648 | 0.008456 | 0.002742 | 0.008707 |
| EIF2C1   | 0.794721 | 4.985423 | 1.26E-06 | 1.17E-05 | 1.27E-06 | 1.19E-05 |
| EIF2C3   | 1.389791 | 7.085407 | 1.89E-11 | 6.69E-10 | 1.63E-11 | 6.02E-10 |
| EIF2S1   | 0.585042 | 3.631969 | 0.000351 | 0.001529 | 0.000352 | 0.001525 |
| EIF2S2   | -0.03186 | -0.25417 | 0.799607 | 0.856172 | 0.800967 | 0.856897 |
| EIF2S3   | 0.021879 | 0.105794 | 0.915843 | 0.942514 | 0.915564 | 0.942227 |
| EIF4A2   | -0.91884 | -3.34755 | 0.00096  | 0.003571 | 0.000894 | 0.003343 |
| EIF4B    | 0.575785 | 3.847162 | 0.000157 | 0.000779 | 0.000161 | 0.000797 |
| EIF4E    | 0.526417 | 2.675053 | 0.008038 | 0.021466 | 0.007864 | 0.021047 |
| EIF4E2   | 0.235319 | 1.996504 | 0.047123 | 0.094447 | 0.049115 | 0.098021 |
| EIF4EBP1 | 0.129212 | 0.558184 | 0.577291 | 0.682069 | 0.575559 | 0.680192 |
| EIF4G1   | 0.58676  | 3.740341 | 0.000235 | 0.001089 | 0.000238 | 0.001103 |
| EIF4G2   | 0.558929 | 4.95984  | 1.42E-06 | 1.30E-05 | 1.79E-06 | 1.59E-05 |
| EIF4G3   | 0.695034 | 5.332094 | 2.42E-07 | 2.69E-06 | 2.77E-07 | 3.01E-06 |
| EIF5     | -0.4785  | -2.51143 | 0.012749 | 0.031806 | 0.012541 | 0.031336 |
| EIF5A    | -0.66749 | -1.93902 | 0.053789 | 0.106    | 0.052078 | 0.103147 |

|         |          |          |          |          |          |          |
|---------|----------|----------|----------|----------|----------|----------|
| ELAVL1  | 0.006151 | 0.040175 | 0.96799  | 0.978609 | 0.968042 | 0.978662 |
| ELF1    | 1.152078 | 8.122545 | 3.36E-14 | 2.73E-12 | 3.76E-14 | 3.04E-12 |
| ELF3    | 1.112016 | 3.812549 | 0.000179 | 0.000867 | 0.000163 | 0.000802 |
| ELF4    | 0.945559 | 5.036048 | 9.95E-07 | 9.64E-06 | 9.37E-07 | 9.11E-06 |
| ELK1    | -0.10848 | -0.69701 | 0.486538 | 0.59862  | 0.48709  | 0.598672 |
| ELK3    | 1.192583 | 8.220283 | 1.81E-14 | 1.58E-12 | 1.96E-14 | 1.73E-12 |
| ELK4    | 0.051228 | 0.327038 | 0.743953 | 0.816951 | 0.744234 | 0.817458 |
| ELL     | 0.43072  | 3.667378 | 0.000308 | 0.001369 | 0.000347 | 0.00151  |
| ELMOD2  | 0.623072 | 4.385626 | 1.80E-05 | 0.000121 | 1.90E-05 | 0.000127 |
| ELN     | -0.16131 | -0.71403 | 0.47597  | 0.589641 | 0.474069 | 0.587763 |
| ELOVL1  | 0.374145 | 2.142869 | 0.033232 | 0.070355 | 0.033059 | 0.069927 |
| ELP3    | 0.274449 | 1.756112 | 0.080474 | 0.147284 | 0.080812 | 0.147502 |
| ELP4    | 0.317467 | 2.0907   | 0.037714 | 0.07812  | 0.038041 | 0.078867 |
| EMCN    | 1.510946 | 6.608305 | 2.94E-10 | 7.26E-09 | 2.41E-10 | 6.19E-09 |
| EML1    | 0.857292 | 3.751095 | 0.000226 | 0.001052 | 0.000211 | 0.000991 |
| EML4    | 0.077048 | 0.446228 | 0.655876 | 0.747134 | 0.655647 | 0.74704  |
| EMP3    | 0.602727 | 3.051376 | 0.002561 | 0.008243 | 0.002488 | 0.008023 |
| ENAH    | 0.295257 | 1.266206 | 0.206791 | 0.311511 | 0.204692 | 0.309044 |
| ENG     | 0.584486 | 4.264727 | 2.98E-05 | 0.000187 | 3.20E-05 | 0.000199 |
| ENO1    | -0.55278 | -2.78829 | 0.005767 | 0.016202 | 0.005627 | 0.015884 |
| ENO2    | -1.46163 | -4.98891 | 1.24E-06 | 1.16E-05 | 1.06E-06 | 1.01E-05 |
| ENPEP   | -0.20767 | -0.5476  | 0.584527 | 0.688024 | 0.581672 | 0.685349 |
| ENPP2   | 1.095059 | 3.126836 | 0.002008 | 0.006697 | 0.00186  | 0.006266 |
| ENSA    | -0.25801 | -1.29949 | 0.195147 | 0.298759 | 0.193882 | 0.29692  |
| ENTPD1  | 0.329205 | 1.677869 | 0.094806 | 0.168719 | 0.093918 | 0.167203 |
| ENTPD2  | 0.188367 | 1.083236 | 0.279901 | 0.391178 | 0.279492 | 0.390375 |
| ENTPD3  | 0.784537 | 2.845494 | 0.004857 | 0.014126 | 0.004606 | 0.013481 |
| ENTPD4  | 0.499253 | 2.120737 | 0.035074 | 0.073396 | 0.034215 | 0.072111 |
| ENTPD5  | 0.739647 | 3.924253 | 0.000117 | 0.000606 | 0.000112 | 0.000587 |
| EP300   | 1.059835 | 5.911999 | 1.29E-08 | 1.93E-07 | 1.21E-08 | 1.83E-07 |
| EP400   | 1.127533 | 8.566324 | 1.96E-15 | 2.19E-13 | 2.45E-15 | 2.74E-13 |
| EPAS1   | -0.03657 | -0.15928 | 0.873598 | 0.907384 | 0.873038 | 0.906802 |
| EPB41   | 0.205482 | 1.666457 | 0.097059 | 0.171753 | 0.099547 | 0.174774 |
| EPB41L1 | 0.740197 | 4.184288 | 4.15E-05 | 0.000251 | 4.04E-05 | 0.000246 |
| EPB41L2 | -0.06203 | -0.23868 | 0.811575 | 0.864551 | 0.810548 | 0.864045 |
| EPB41L3 | 0.159621 | 0.474862 | 0.63536  | 0.730836 | 0.632958 | 0.728428 |
| EPB49   | 0.849331 | 4.288329 | 2.70E-05 | 0.000172 | 2.56E-05 | 0.000163 |
| EPHA1   | 0.316592 | 2.093274 | 0.037481 | 0.077844 | 0.037823 | 0.078555 |
| EPHA4   | 0.279013 | 0.870426 | 0.385025 | 0.502235 | 0.381762 | 0.498411 |
| EPHB2   | 0.508366 | 1.842594 | 0.066746 | 0.12703  | 0.065124 | 0.124272 |
| EPHB3   | 0.079587 | 0.269667 | 0.787672 | 0.846869 | 0.786341 | 0.846368 |



|          |          |          |          |          |          |          |
|----------|----------|----------|----------|----------|----------|----------|
| EPHB4    | 0.721686 | 3.965299 | 9.94E-05 | 0.00053  | 9.65E-05 | 0.000514 |
| EPHB6    | 0.203623 | 0.624508 | 0.532947 | 0.642434 | 0.530097 | 0.639038 |
| EPHX1    | -0.51415 | -1.84251 | 0.066758 | 0.12703  | 0.065115 | 0.124272 |
| EPM2A    | 0.43902  | 2.552141 | 0.011391 | 0.028823 | 0.011328 | 0.028701 |
| EPM2AIP1 | -0.03824 | -0.15851 | 0.874198 | 0.907807 | 0.873583 | 0.907167 |
| EPN1     | -0.03679 | -0.36873 | 0.712688 | 0.79311  | 0.717099 | 0.797146 |
| EPOR     | 0.438135 | 3.294246 | 0.001152 | 0.004151 | 0.001217 | 0.004361 |
| EPRS     | 0.186348 | 1.213868 | 0.226112 | 0.332686 | 0.226824 | 0.334298 |
| EPS15    | 0.840392 | 8.095665 | 3.99E-14 | 3.12E-12 | 7.72E-14 | 5.58E-12 |
| EPS15L1  | 1.142398 | 7.184094 | 1.06E-11 | 4.11E-10 | 1.05E-11 | 4.08E-10 |
| EPS8L2   | 0.216483 | 0.947917 | 0.344221 | 0.459671 | 0.342089 | 0.457416 |
| EPSTI1   | -0.72935 | -3.07877 | 0.002345 | 0.00765  | 0.002233 | 0.007343 |
| ERAL1    | 0.303605 | 1.680109 | 0.094368 | 0.168004 | 0.093873 | 0.167186 |
| ERBB2    | 0.142868 | 0.321855 | 0.747871 | 0.819912 | 0.745898 | 0.81852  |
| ERBB3    | -0.26996 | -1.27587 | 0.20336  | 0.307725 | 0.201729 | 0.306003 |
| ERCC1    | 0.496127 | 2.92584  | 0.003799 | 0.011438 | 0.003779 | 0.011401 |
| ERCC2    | -0.0442  | -0.29629 | 0.767287 | 0.833218 | 0.767786 | 0.833457 |
| ERCC3    | -0.24993 | -1.89041 | 0.06003  | 0.116251 | 0.061375 | 0.11827  |
| ERCC5    | 0.201556 | 1.270454 | 0.205277 | 0.309827 | 0.205659 | 0.310082 |
| ERCC8    | 0.225584 | 1.100726 | 0.27223  | 0.382963 | 0.270683 | 0.381129 |
| ERF      | -0.12424 | -0.87353 | 0.383337 | 0.500629 | 0.384924 | 0.501702 |
| ERG      | 0.424671 | 3.410378 | 0.000773 | 0.002986 | 0.000839 | 0.00319  |
| ERO1L    | 0.665847 | 2.391272 | 0.01764  | 0.041662 | 0.016961 | 0.040342 |
| ERO1LB   | 1.487745 | 5.395238 | 1.78E-07 | 2.05E-06 | 1.49E-07 | 1.75E-06 |
| ESD      | 0.336913 | 1.808927 | 0.07184  | 0.134951 | 0.071281 | 0.134008 |
| ESM1     | 0.235725 | 0.675608 | 0.500006 | 0.612784 | 0.49689  | 0.608966 |
| ESPL1    | 0.041264 | 0.225567 | 0.82175  | 0.87203  | 0.821461 | 0.871921 |
| ESRRA    | 0.285666 | 2.585952 | 0.010362 | 0.026671 | 0.011251 | 0.028553 |
| ETFA     | 0.149763 | 0.779717 | 0.436403 | 0.552707 | 0.435316 | 0.550752 |
| ETFB     | 0.266546 | 1.008962 | 0.314112 | 0.428218 | 0.311367 | 0.425238 |
| ETNK1    | 0.019376 | 0.075024 | 0.940264 | 0.959662 | 0.939936 | 0.959327 |
| ETS2     | 0.609758 | 2.380316 | 0.018159 | 0.042652 | 0.017533 | 0.041348 |
| ETV4     | 0.70941  | 2.495317 | 0.013326 | 0.033104 | 0.012761 | 0.031818 |
| ETV5     | -0.09585 | -0.39556 | 0.692814 | 0.776771 | 0.691364 | 0.775515 |
| ETV6     | 0.198851 | 1.085132 | 0.279062 | 0.390325 | 0.278248 | 0.389346 |
| EVI2B    | 0.228633 | 1.282811 | 0.20092  | 0.305212 | 0.200351 | 0.304544 |
| EVL      | -0.34057 | -2.16858 | 0.031197 | 0.066588 | 0.031363 | 0.066972 |
| EVPL     | -0.16782 | -0.76835 | 0.443109 | 0.558491 | 0.441305 | 0.556814 |
| EWSR1    | 0.363207 | 2.970399 | 0.003307 | 0.0102   | 0.003548 | 0.010778 |
| EXO1     | -0.05863 | -0.28403 | 0.77666  | 0.839502 | 0.775942 | 0.839146 |
| EXOSC10  | 0.063396 | 0.525225 | 0.599961 | 0.699706 | 0.602947 | 0.70284  |

|         |          |          |          |          |          |          |
|---------|----------|----------|----------|----------|----------|----------|
| EXOSC4  | -0.43591 | -2.41666 | 0.016487 | 0.039434 | 0.016322 | 0.039005 |
| EXOSC5  | -0.28568 | -1.64715 | 0.100967 | 0.176477 | 0.100683 | 0.17626  |
| EXT1    | 0.782376 | 3.018387 | 0.002844 | 0.008977 | 0.002692 | 0.008566 |
| EXTL2   | 1.048104 | 5.847785 | 1.81E-08 | 2.61E-07 | 1.70E-08 | 2.49E-07 |
| EXTL3   | 0.333676 | 3.2717   | 0.001243 | 0.004435 | 0.001461 | 0.00513  |
| EYA2    | -0.31878 | -0.56471 | 0.572855 | 0.678169 | 0.569555 | 0.674964 |
| EYA3    | 0.050957 | 0.532017 | 0.595256 | 0.696004 | 0.601942 | 0.702017 |
| EZH1    | 0.865686 | 7.078041 | 1.98E-11 | 6.93E-10 | 2.62E-11 | 8.72E-10 |
| EZH2    | -0.04109 | -0.16467 | 0.869355 | 0.904977 | 0.868678 | 0.904472 |
| F10     | 0.658387 | 2.997463 | 0.003038 | 0.0095   | 0.00292  | 0.009197 |
| F11R    | 1.001261 | 5.354376 | 2.17E-07 | 2.44E-06 | 2.03E-07 | 2.32E-06 |
| F13A1   | 0.670266 | 1.809666 | 0.071725 | 0.134789 | 0.069612 | 0.131396 |
| F2R     | 0.443283 | 2.320735 | 0.021225 | 0.048734 | 0.020921 | 0.048058 |
| F2RL1   | 0.591679 | 2.163379 | 0.0316   | 0.067322 | 0.030598 | 0.065637 |
| F2RL3   | 0.30443  | 2.802261 | 0.005532 | 0.01569  | 0.006115 | 0.017139 |
| F3      | -0.29429 | -0.72533 | 0.46903  | 0.583958 | 0.465552 | 0.580704 |
| F5      | 1.364631 | 2.45404  | 0.01491  | 0.036272 | 0.01407  | 0.034549 |
| F7      | 0.931778 | 7.587614 | 9.36E-13 | 4.44E-11 | 1.26E-12 | 5.82E-11 |
| F8      | 1.907409 | 6.297396 | 1.65E-09 | 3.24E-08 | 1.28E-09 | 2.57E-08 |
| FAAH    | 0.255238 | 1.214845 | 0.225739 | 0.332455 | 0.224103 | 0.331213 |
| FABP3   | 0.356907 | 0.967572 | 0.334331 | 0.4496   | 0.330714 | 0.44563  |
| FABP4   | 1.920168 | 5.43569  | 1.46E-07 | 1.71E-06 | 1.18E-07 | 1.41E-06 |
| FABP6   | -0.18137 | -1.22071 | 0.223513 | 0.330557 | 0.224562 | 0.331318 |
| FADD    | 0.246041 | 1.079553 | 0.281534 | 0.392528 | 0.279417 | 0.390375 |
| FADS3   | -0.19555 | -1.00211 | 0.317402 | 0.431403 | 0.316147 | 0.429572 |
| FAF1    | 0.120696 | 0.60305  | 0.547102 | 0.65563  | 0.545931 | 0.654561 |
| FAH     | 0.717006 | 3.966454 | 9.90E-05 | 0.000528 | 9.63E-05 | 0.000514 |
| FAHD2A  | 0.430842 | 2.576328 | 0.010646 | 0.027253 | 0.010625 | 0.027272 |
| FAIM2   | 0.010451 | 0.058181 | 0.953658 | 0.969332 | 0.953595 | 0.969058 |
| FAM19A5 | -0.46303 | -1.29241 | 0.197582 | 0.30131  | 0.194288 | 0.297444 |
| FAM36A  | 0.317828 | 1.700154 | 0.090528 | 0.161903 | 0.089878 | 0.160986 |
| FAM3A   | -0.19121 | -1.35369 | 0.177237 | 0.275924 | 0.178747 | 0.277814 |
| FAM3C   | -0.14373 | -0.64685 | 0.51841  | 0.630023 | 0.516678 | 0.628465 |
| FAM40A  | 0.292957 | 2.357446 | 0.019287 | 0.044986 | 0.020151 | 0.04654  |
| FAM48A  | -0.40896 | -2.59597 | 0.010074 | 0.026058 | 0.010139 | 0.026198 |
| FANCA   | -0.18325 | -1.50605 | 0.133503 | 0.220377 | 0.136571 | 0.224121 |
| FANCC   | 0.019117 | 0.169907 | 0.865241 | 0.903094 | 0.866678 | 0.903992 |
| FANCD2  | 0.477688 | 4.023192 | 7.92E-05 | 0.000434 | 9.05E-05 | 0.000487 |
| FANCG   | 0.80893  | 3.371215 | 0.000885 | 0.003336 | 0.000834 | 0.003176 |
| FAP     | 0.027958 | 0.105902 | 0.915757 | 0.942514 | 0.915281 | 0.942142 |
| FARP1   | 0.879051 | 2.816271 | 0.005304 | 0.015145 | 0.005002 | 0.014415 |

|        |          |          |          |          |          |          |
|--------|----------|----------|----------|----------|----------|----------|
| FARS2  | 0.391447 | 2.517406 | 0.012541 | 0.03132  | 0.012643 | 0.03154  |
| FAS    | 0.117124 | 0.363554 | 0.716544 | 0.79671  | 0.714671 | 0.795396 |
| FASN   | 0.069855 | 0.500022 | 0.617564 | 0.714034 | 0.618901 | 0.71607  |
| FAU    | 0.462791 | 4.190615 | 4.04E-05 | 0.000245 | 4.89E-05 | 0.000287 |
| FBL    | 0.13064  | 0.708626 | 0.479314 | 0.592212 | 0.478534 | 0.591405 |
| FBLN1  | 1.169458 | 3.896198 | 0.00013  | 0.000669 | 0.000117 | 0.000609 |
| FBLN2  | 0.157231 | 0.598893 | 0.549866 | 0.657433 | 0.54762  | 0.656068 |
| FBLN5  | -0.20699 | -0.94107 | 0.347712 | 0.463109 | 0.345768 | 0.461679 |
| FBN1   | 0.348559 | 1.718085 | 0.087201 | 0.156848 | 0.086216 | 0.155672 |
| FBP1   | 0.505374 | 1.394679 | 0.164532 | 0.259933 | 0.161413 | 0.255952 |
| FBP2   | 0.291127 | 0.873496 | 0.383354 | 0.500629 | 0.379998 | 0.496297 |
| FBXL15 | 0.382287 | 2.482084 | 0.013817 | 0.034035 | 0.013945 | 0.03428  |
| FBXO10 | 0.409051 | 4.716441 | 4.28E-06 | 3.42E-05 | 6.99E-06 | 5.27E-05 |
| FBXO11 | 0.25306  | 1.387908 | 0.166582 | 0.262907 | 0.165892 | 0.261993 |
| FBXO16 | 0.121594 | 0.420345 | 0.674647 | 0.761944 | 0.672716 | 0.760222 |
| FBXO2  | 0.4372   | 2.291952 | 0.022863 | 0.051786 | 0.022545 | 0.051312 |
| FBXO21 | -0.10495 | -0.64781 | 0.51779  | 0.629647 | 0.51798  | 0.629559 |
| FBXO34 | 0.198189 | 1.573214 | 0.11712  | 0.198579 | 0.119591 | 0.201606 |
| FBXO38 | 0.102116 | 0.802058 | 0.423393 | 0.539135 | 0.426378 | 0.542132 |
| FBXO9  | 0.028277 | 0.126882 | 0.899151 | 0.929406 | 0.898733 | 0.928974 |
| FBXW11 | -0.12779 | -0.87026 | 0.385118 | 0.502235 | 0.386333 | 0.503121 |
| FBXW2  | 0.82988  | 4.069907 | 6.58E-05 | 0.000372 | 6.21E-05 | 0.000351 |
| FBXW7  | 0.464803 | 3.090101 | 0.002261 | 0.007433 | 0.002303 | 0.007532 |
| FCER1G | 0.419091 | 2.124663 | 0.034741 | 0.072829 | 0.034237 | 0.072119 |
| FCER2  | -0.01534 | -0.09918 | 0.921087 | 0.945638 | 0.921198 | 0.945939 |
| FCGR1A | 0.092082 | 0.956711 | 0.339773 | 0.455097 | 0.348451 | 0.464338 |
| FCGR2A | -0.39254 | -2.82129 | 0.005225 | 0.014992 | 0.005393 | 0.015344 |
| FCGR2B | 0.660908 | 1.992327 | 0.047583 | 0.095165 | 0.046034 | 0.092699 |
| FCGRT  | 0.487264 | 2.221866 | 0.02732  | 0.059974 | 0.026701 | 0.058862 |
| FCHO2  | 0.476246 | 2.958101 | 0.003437 | 0.010509 | 0.00345  | 0.010549 |
| FCN1   | 0.075283 | 0.263994 | 0.792034 | 0.850287 | 0.790772 | 0.849321 |
| FCN3   | 0.786269 | 4.192358 | 4.01E-05 | 0.000244 | 3.85E-05 | 0.000235 |
| FDFT1  | -0.11977 | -0.37279 | 0.709665 | 0.790385 | 0.707755 | 0.788655 |
| FDX1   | 1.04102  | 5.779855 | 2.57E-08 | 3.62E-07 | 2.41E-08 | 3.40E-07 |
| FECH   | 0.495607 | 2.249838 | 0.025458 | 0.056573 | 0.024861 | 0.055483 |
| FEN1   | -0.17191 | -1.0201  | 0.308812 | 0.422302 | 0.308668 | 0.422586 |
| FER    | 0.690076 | 3.688466 | 0.000285 | 0.001284 | 0.000276 | 0.001249 |
| FEZ1   | 0.636613 | 4.287599 | 2.71E-05 | 0.000172 | 2.81E-05 | 0.000177 |
| FGA    | 1.652773 | 6.184339 | 3.04E-09 | 5.59E-08 | 2.44E-09 | 4.59E-08 |
| FGD1   | 1.345537 | 8.204431 | 2.00E-14 | 1.68E-12 | 1.89E-14 | 1.71E-12 |
| FGD2   | 0.099151 | 0.769926 | 0.442177 | 0.557765 | 0.444956 | 0.55979  |

|          |          |          |          |          |          |          |
|----------|----------|----------|----------|----------|----------|----------|
| FGD6     | -0.02711 | -0.09941 | 0.920908 | 0.945638 | 0.920442 | 0.945384 |
| FGF1     | 0.026646 | 0.186043 | 0.852584 | 0.893057 | 0.853047 | 0.893343 |
| FGF11    | 0.391458 | 3.432473 | 0.000716 | 0.002833 | 0.000807 | 0.003107 |
| FGF12    | 0.000465 | 0.00442  | 0.996477 | 0.998176 | 0.996525 | 0.998224 |
| FGF18    | 0.634081 | 3.076549 | 0.002362 | 0.007694 | 0.002282 | 0.007485 |
| FGF9     | -0.15788 | -0.44671 | 0.655528 | 0.747134 | 0.653167 | 0.745117 |
| FGFBP1   | -0.27529 | -0.62746 | 0.531017 | 0.6406   | 0.527707 | 0.637262 |
| FGFR1    | 0.135486 | 0.724754 | 0.46938  | 0.584239 | 0.4685   | 0.583452 |
| FGFR1OP  | 0.599039 | 3.620055 | 0.000366 | 0.001584 | 0.000365 | 0.001578 |
| FGFR1OP2 | 0.246993 | 0.883954 | 0.377695 | 0.494475 | 0.374801 | 0.491234 |
| FGFR4    | 0.503669 | 2.673027 | 0.008086 | 0.021568 | 0.007947 | 0.021246 |
| FGL1     | 0.861195 | 1.869777 | 0.062855 | 0.120857 | 0.060727 | 0.117311 |
| FGL2     | 0.576266 | 1.812128 | 0.071342 | 0.134285 | 0.069423 | 0.131144 |
| FH       | -0.04243 | -0.26632 | 0.790242 | 0.848961 | 0.790405 | 0.84912  |
| FHIT     | 0.295125 | 1.147419 | 0.252466 | 0.361435 | 0.249873 | 0.358787 |
| FHL1     | 0.472771 | 1.674452 | 0.095476 | 0.16959  | 0.09345  | 0.166673 |
| FHL2     | -0.6532  | -2.58827 | 0.010295 | 0.026556 | 0.009892 | 0.025654 |
| FHL3     | 1.035149 | 6.985519 | 3.39E-11 | 1.08E-09 | 3.59E-11 | 1.15E-09 |
| FHOD3    | 0.066396 | 0.203262 | 0.83912  | 0.883482 | 0.838014 | 0.882713 |
| FIBP     | -0.05114 | -0.33507 | 0.737894 | 0.812169 | 0.738322 | 0.812292 |
| FIGNL1   | 0.395984 | 1.807345 | 0.072087 | 0.135253 | 0.070948 | 0.133649 |
| FIPIL1   | -0.14679 | -0.97753 | 0.329389 | 0.444099 | 0.330374 | 0.445427 |
| FKBP11   | -0.08631 | -0.28473 | 0.776119 | 0.839406 | 0.774686 | 0.838366 |
| FKBP1A   | 0.380033 | 1.763143 | 0.079277 | 0.145597 | 0.078129 | 0.143946 |
| FKBP2    | 0.074999 | 0.50938  | 0.611001 | 0.709063 | 0.611895 | 0.709749 |
| FKBP4    | -0.5899  | -3.49658 | 0.000571 | 0.002331 | 0.000567 | 0.002313 |
| FKBP5    | -1.00707 | -2.96418 | 0.003372 | 0.010339 | 0.00315  | 0.009772 |
| FKBP8    | -0.16095 | -1.32441 | 0.186754 | 0.288352 | 0.190255 | 0.292413 |
| FKBP9    | 0.614475 | 3.460992 | 0.000647 | 0.002594 | 0.000636 | 0.00256  |
| FLI1     | -0.01763 | -0.15779 | 0.874766 | 0.908196 | 0.876139 | 0.90942  |
| FLI2     | 0.046384 | 0.282631 | 0.777728 | 0.839763 | 0.777774 | 0.840094 |
| FLJ36031 | 0.585837 | 4.867568 | 2.17E-06 | 1.84E-05 | 2.58E-06 | 2.16E-05 |
| FLNB     | -0.04679 | -0.22023 | 0.825901 | 0.875052 | 0.825276 | 0.874194 |
| FLNC     | -0.82341 | -3.54032 | 0.000489 | 0.002035 | 0.000459 | 0.001931 |
| FLOT1    | 0.154126 | 1.161063 | 0.246886 | 0.355831 | 0.249333 | 0.358149 |
| FLRT2    | 0.668737 | 3.591441 | 0.000406 | 0.001733 | 0.000395 | 0.001685 |
| FLRT3    | 0.234183 | 0.427742 | 0.669261 | 0.758507 | 0.666601 | 0.755926 |
| FLT1     | 1.163721 | 5.422548 | 1.55E-07 | 1.82E-06 | 1.38E-07 | 1.63E-06 |
| FLT3LG   | 0.058264 | 0.455594 | 0.649135 | 0.741959 | 0.6512   | 0.743596 |
| FMNL1    | -0.26075 | -2.5707  | 0.010815 | 0.027641 | 0.012052 | 0.030242 |
| FMO1     | 1.941102 | 4.11944  | 5.39E-05 | 0.000314 | 4.67E-05 | 0.000277 |

|        |          |          |          |          |          |          |
|--------|----------|----------|----------|----------|----------|----------|
| FMO2   | 0.15638  | 0.384218 | 0.701191 | 0.784293 | 0.69896  | 0.781983 |
| FMO4   | 0.98856  | 5.373213 | 1.98E-07 | 2.26E-06 | 1.86E-07 | 2.14E-06 |
| FMO5   | 1.031824 | 3.019439 | 0.002834 | 0.008953 | 0.002641 | 0.008437 |
| FMOD   | 0.889464 | 2.617876 | 0.009468 | 0.024695 | 0.008966 | 0.023569 |
| FN1    | 1.025832 | 3.3972   | 0.000809 | 0.003102 | 0.000747 | 0.002912 |
| FN3K   | 0.1064   | 0.984905 | 0.325762 | 0.440346 | 0.331788 | 0.446821 |
| FNBP1  | 0.056589 | 0.269868 | 0.787517 | 0.846869 | 0.786793 | 0.846595 |
| FNBP4  | -0.10804 | -0.5772  | 0.564397 | 0.67092  | 0.563619 | 0.669957 |
| FNTA   | -0.47816 | -2.68408 | 0.007831 | 0.021009 | 0.007748 | 0.020785 |
| FNTB   | 0.187857 | 1.607854 | 0.109314 | 0.187922 | 0.112628 | 0.192212 |
| FOLR1  | 0.526668 | 1.503897 | 0.134055 | 0.220919 | 0.131237 | 0.217494 |
| FOLR2  | 0.237585 | 1.805352 | 0.072399 | 0.135676 | 0.073938 | 0.13812  |
| FOLR3  | 0.258784 | 1.003625 | 0.316672 | 0.430784 | 0.314017 | 0.427543 |
| FOSB   | 1.163806 | 2.816358 | 0.005303 | 0.015145 | 0.004952 | 0.014297 |
| FOSL1  | 1.03241  | 3.58032  | 0.000423 | 0.001798 | 0.000389 | 0.001665 |
| FOXA1  | -0.28938 | -0.83296 | 0.405776 | 0.522101 | 0.402375 | 0.518203 |
| FOXA2  | 0.643436 | 1.649465 | 0.100493 | 0.175943 | 0.097895 | 0.172712 |
| FOXA3  | 0.234086 | 0.71957  | 0.472561 | 0.587265 | 0.469486 | 0.584061 |
| FOXDI  | 0.14274  | 0.285271 | 0.775708 | 0.839406 | 0.773878 | 0.837684 |
| FOXFI  | 0.156669 | 0.718495 | 0.473222 | 0.587775 | 0.471479 | 0.585921 |
| FOXFI2 | 0.997478 | 2.688075 | 0.007741 | 0.020815 | 0.007291 | 0.019807 |
| FOXJ1  | -0.29949 | -1.09152 | 0.276248 | 0.387571 | 0.273395 | 0.384087 |
| FOXJ2  | 0.328204 | 3.901848 | 0.000127 | 0.000655 | 0.000186 | 0.000897 |
| FOXMI  | -0.22963 | -1.0452  | 0.297089 | 0.410078 | 0.295146 | 0.407636 |
| FPGS   | 0.272448 | 1.64158  | 0.102119 | 0.17796  | 0.102101 | 0.178118 |
| FPGT   | 1.258046 | 6.633423 | 2.55E-10 | 6.48E-09 | 2.27E-10 | 5.87E-09 |
| FPR1   | -0.03877 | -0.22893 | 0.81914  | 0.870363 | 0.819075 | 0.870323 |
| FRG1   | 0.513126 | 3.116813 | 0.002074 | 0.00689  | 0.002073 | 0.006886 |
| FRS2   | 1.219985 | 6.333803 | 1.35E-09 | 2.72E-08 | 1.21E-09 | 2.47E-08 |
| FRS3   | -0.36392 | -2.30497 | 0.022109 | 0.050492 | 0.022224 | 0.050704 |
| FRZB   | -0.65084 | -1.64373 | 0.101673 | 0.177447 | 0.099043 | 0.17407  |
| FSCN2  | 0.176583 | 1.381603 | 0.168508 | 0.265411 | 0.17119  | 0.268466 |
| FST    | 1.626247 | 3.177151 | 0.001703 | 0.005808 | 0.001555 | 0.005379 |
| FSTL1  | 0.244387 | 1.424545 | 0.155719 | 0.249277 | 0.155457 | 0.248627 |
| FTCD   | 0.190184 | 1.620328 | 0.106607 | 0.184008 | 0.109821 | 0.188642 |
| FTSJ1  | 0.258337 | 1.759672 | 0.079866 | 0.1464   | 0.080622 | 0.147212 |
| FUBP1  | 0.134582 | 0.695053 | 0.487762 | 0.599655 | 0.486682 | 0.598484 |
| FUBP3  | 0.227045 | 1.751349 | 0.081292 | 0.148263 | 0.083071 | 0.151039 |
| FURIN  | 0.103122 | 0.816077 | 0.415347 | 0.531481 | 0.41846  | 0.534011 |
| FUT10  | 0.031996 | 0.2033   | 0.83909  | 0.883482 | 0.839256 | 0.883427 |
| FUT6   | -0.49553 | -1.80229 | 0.072881 | 0.13647  | 0.071181 | 0.133968 |

|           |          |          |          |          |          |          |
|-----------|----------|----------|----------|----------|----------|----------|
| FUT8      | 0.43575  | 1.650338 | 0.100314 | 0.175858 | 0.098392 | 0.173135 |
| FXC1      | 0.304462 | 1.915294 | 0.056764 | 0.110931 | 0.056951 | 0.111205 |
| FXN       | 0.82877  | 5.601667 | 6.36E-08 | 8.24E-07 | 6.69E-08 | 8.45E-07 |
| FXR1      | 0.875398 | 4.87571  | 2.09E-06 | 1.79E-05 | 2.00E-06 | 1.74E-05 |
| FXR2      | 0.120854 | 1.135595 | 0.257373 | 0.36634  | 0.263614 | 0.373977 |
| FXYD2     | 0.516847 | 1.520798 | 0.12976  | 0.21573  | 0.12703  | 0.211717 |
| FXYD3     | -0.62868 | -1.98574 | 0.048315 | 0.096507 | 0.046802 | 0.093923 |
| FYB       | -0.01218 | -0.0636  | 0.949345 | 0.966412 | 0.949228 | 0.966292 |
| FYN       | -0.42494 | -2.07633 | 0.039036 | 0.08054  | 0.038403 | 0.079407 |
| FZD3      | 0.483594 | 1.662    | 0.09795  | 0.17294  | 0.095835 | 0.169715 |
| FZD4      | 0.730493 | 6.199221 | 2.80E-09 | 5.24E-08 | 3.70E-09 | 6.61E-08 |
| FZD7      | 1.139529 | 3.528037 | 0.00051  | 0.002108 | 0.000466 | 0.001954 |
| FZD9      | -0.02311 | -0.16743 | 0.867184 | 0.904338 | 0.867727 | 0.904472 |
| FZR1      | 0.275642 | 2.585559 | 0.010373 | 0.026686 | 0.011385 | 0.028829 |
| G3BP2     | -0.05579 | -0.32399 | 0.74626  | 0.818725 | 0.746097 | 0.818548 |
| GAA       | 0.771549 | 3.691991 | 0.000281 | 0.001272 | 0.000267 | 0.001216 |
| GAB1      | 0.617994 | 3.892965 | 0.000132 | 0.000675 | 0.000133 | 0.000677 |
| GAB2      | 0.703005 | 3.320453 | 0.001053 | 0.003856 | 0.001009 | 0.003709 |
| GABARAP   | 0.461074 | 4.443306 | 1.41E-05 | 9.77E-05 | 1.83E-05 | 0.000123 |
| GABARAPL2 | 0.265742 | 1.943974 | 0.053185 | 0.105081 | 0.05421  | 0.106829 |
| GABBR1    | 0.0907   | 0.459488 | 0.646341 | 0.74056  | 0.645439 | 0.739328 |
| GABPB2    | -0.4579  | -2.39875 | 0.017293 | 0.041029 | 0.01703  | 0.040466 |
| GABRB1    | -0.44945 | -1.60122 | 0.110776 | 0.189947 | 0.108607 | 0.18698  |
| GABRB3    | 0.476    | 0.899834 | 0.369201 | 0.485384 | 0.365147 | 0.481284 |
| GABRD     | 0.376059 | 3.122435 | 0.002037 | 0.00678  | 0.00221  | 0.007286 |
| GABRE     | 0.615714 | 1.250695 | 0.212386 | 0.317678 | 0.208592 | 0.313521 |
| GAD1      | 0.394737 | 1.099496 | 0.272764 | 0.383371 | 0.26923  | 0.379425 |
| GADD45B   | 0.272136 | 1.111399 | 0.267621 | 0.37795  | 0.265198 | 0.375432 |
| GADD45G   | -0.5829  | -2.33278 | 0.020571 | 0.047487 | 0.019911 | 0.046168 |
| GAK       | 0.207178 | 1.249865 | 0.212689 | 0.31785  | 0.212686 | 0.318048 |
| GALE      | 0.258183 | 1.461443 | 0.145334 | 0.235136 | 0.144879 | 0.234731 |
| GALK1     | 0.21839  | 1.799021 | 0.073398 | 0.137221 | 0.075691 | 0.140613 |
| GALK2     | 0.424697 | 2.399985 | 0.017236 | 0.040935 | 0.0171   | 0.040591 |
| GALNS     | 0.256453 | 2.235915 | 0.026371 | 0.058216 | 0.027885 | 0.0609   |
| GALNT11   | 0.681715 | 3.072864 | 0.00239  | 0.007775 | 0.002291 | 0.007502 |
| GALNT3    | 0.782963 | 4.868075 | 2.16E-06 | 1.84E-05 | 2.17E-06 | 1.86E-05 |
| GALNT6    | 0.341826 | 1.002989 | 0.316978 | 0.430951 | 0.313516 | 0.427226 |
| GALNT7    | 0.703695 | 2.860716 | 0.004638 | 0.013581 | 0.004429 | 0.01306  |
| GALNTL2   | 0.784766 | 2.639981 | 0.00889  | 0.023435 | 0.008456 | 0.022404 |
| GAMT      | 0.42952  | 2.91013  | 0.003987 | 0.011945 | 0.00407  | 0.012181 |
| GAP43     | -0.73671 | -2.595   | 0.010101 | 0.026114 | 0.009643 | 0.025082 |

|        |          |          |          |          |          |          |
|--------|----------|----------|----------|----------|----------|----------|
| GARS   | 0.0603   | 0.362577 | 0.717272 | 0.797157 | 0.717262 | 0.797146 |
| GART   | 0.893628 | 4.932971 | 1.61E-06 | 1.43E-05 | 1.53E-06 | 1.38E-05 |
| GAS1   | 0.357622 | 1.348236 | 0.178982 | 0.278087 | 0.176507 | 0.275049 |
| GAS2L1 | -0.14808 | -0.84493 | 0.399074 | 0.515288 | 0.398616 | 0.515263 |
| GAS6   | 0.041458 | 0.152066 | 0.879276 | 0.912273 | 0.878568 | 0.911538 |
| GAS8   | -0.18782 | -1.65888 | 0.098579 | 0.173789 | 0.102134 | 0.178118 |
| GATA2  | 0.418614 | 2.771709 | 0.006058 | 0.016899 | 0.006147 | 0.017197 |
| GATA4  | 0.387432 | 1.652742 | 0.099823 | 0.175259 | 0.098239 | 0.173124 |
| GATA6  | 0.310834 | 1.311483 | 0.191074 | 0.293864 | 0.188956 | 0.290892 |
| GATM   | 0.183109 | 1.258513 | 0.209552 | 0.314897 | 0.210809 | 0.315915 |
| GBA2   | 0.044426 | 0.213485 | 0.831148 | 0.878791 | 0.830582 | 0.878796 |
| GBAS   | 0.280953 | 1.276502 | 0.203136 | 0.307584 | 0.20131  | 0.305507 |
| GBE1   | 0.748051 | 3.424514 | 0.000736 | 0.002896 | 0.0007   | 0.002773 |
| GBF1   | 0.177992 | 1.203184 | 0.23021  | 0.336963 | 0.231314 | 0.338262 |
| GBGT1  | 0.669203 | 2.922689 | 0.003836 | 0.011535 | 0.003679 | 0.011119 |
| GBP2   | -0.58708 | -3.04387 | 0.002623 | 0.008386 | 0.002557 | 0.008192 |
| GC     | 0.06039  | 0.094095 | 0.92512  | 0.947752 | 0.924463 | 0.947342 |
| GCA    | 0.572505 | 2.624507 | 0.009291 | 0.024301 | 0.009012 | 0.023662 |
| GCAT   | -0.2584  | -1.16766 | 0.244218 | 0.353305 | 0.242285 | 0.351051 |
| GCC1   | -0.20406 | -1.61615 | 0.107507 | 0.185222 | 0.109854 | 0.188642 |
| GCC2   | 0.596333 | 3.134296 | 0.00196  | 0.006574 | 0.001911 | 0.006421 |
| GCDH   | 0.194695 | 1.364445 | 0.173834 | 0.272069 | 0.175224 | 0.273469 |
| GCGR   | 0.264366 | 2.134721 | 0.0339   | 0.07148  | 0.035199 | 0.073657 |
| GCHFR  | -0.07985 | -0.29946 | 0.764871 | 0.831766 | 0.76356  | 0.830725 |
| GCLC   | 1.857562 | 8.008662 | 6.90E-14 | 4.77E-12 | 5.14E-14 | 3.90E-12 |
| GCNT1  | 1.138064 | 2.932542 | 0.003721 | 0.011239 | 0.003463 | 0.01057  |
| GCNT2  | 0.526292 | 1.791534 | 0.074595 | 0.13907  | 0.072751 | 0.136176 |
| GDA    | -0.56232 | -1.39799 | 0.163536 | 0.25862  | 0.160268 | 0.25448  |
| GDF10  | 0.227481 | 0.875171 | 0.382444 | 0.499996 | 0.379803 | 0.496267 |
| GDF15  | -0.25219 | -1.41272 | 0.159164 | 0.253498 | 0.158624 | 0.252723 |
| GDI2   | -0.25413 | -1.64986 | 0.100412 | 0.175898 | 0.100899 | 0.176489 |
| GEM    | -0.1231  | -0.46935 | 0.639285 | 0.734451 | 0.637401 | 0.732287 |
| GEMIN4 | 0.313624 | 2.124775 | 0.034731 | 0.072829 | 0.035157 | 0.073602 |
| GEMIN7 | 0.03816  | 0.249316 | 0.803351 | 0.858515 | 0.803666 | 0.859047 |
| GFPT1  | 0.079739 | 0.389176 | 0.697526 | 0.780608 | 0.696602 | 0.779716 |
| GFPT2  | 0.195506 | 0.764632 | 0.445317 | 0.560523 | 0.442849 | 0.55827  |
| GFRA1  | 0.313826 | 1.375806 | 0.170294 | 0.267547 | 0.16841  | 0.265168 |
| GFRA2  | -0.02256 | -0.19481 | 0.845727 | 0.887853 | 0.847199 | 0.8892   |
| GFRA3  | 0.167206 | 0.699262 | 0.485134 | 0.597362 | 0.483014 | 0.595532 |
| GGA1   | -0.18708 | -1.37596 | 0.170245 | 0.267547 | 0.172165 | 0.269545 |
| GGA2   | 0.076576 | 0.604705 | 0.546004 | 0.654481 | 0.548658 | 0.656074 |

|         |          |          |          |          |          |          |
|---------|----------|----------|----------|----------|----------|----------|
| GGCX    | 0.385385 | 2.041838 | 0.042372 | 0.086398 | 0.041923 | 0.085484 |
| GGH     | 0.065734 | 0.167166 | 0.867394 | 0.904338 | 0.866378 | 0.90388  |
| GGPS1   | 0.23133  | 1.424042 | 0.155864 | 0.24934  | 0.156015 | 0.249412 |
| GHITM   | 0.353378 | 2.283748 | 0.02335  | 0.052685 | 0.023527 | 0.053189 |
| GHR     | 1.334039 | 4.411133 | 1.62E-05 | 0.00011  | 1.42E-05 | 9.89E-05 |
| GHRL    | -0.81841 | -2.63381 | 0.009048 | 0.023811 | 0.008592 | 0.0227   |
| GIT1    | 0.735004 | 5.88609  | 1.48E-08 | 2.17E-07 | 1.80E-08 | 2.62E-07 |
| GIT2    | -0.44633 | -2.34469 | 0.019942 | 0.046254 | 0.019656 | 0.045757 |
| GJA4    | 1.088816 | 6.787168 | 1.07E-10 | 2.98E-09 | 1.05E-10 | 3.02E-09 |
| GJB1    | -0.08829 | -0.29832 | 0.765743 | 0.832459 | 0.764279 | 0.831122 |
| GJB2    | -0.5455  | -1.20799 | 0.22836  | 0.3353   | 0.224591 | 0.331318 |
| GJC1    | 1.068067 | 5.581838 | 7.03E-08 | 8.96E-07 | 6.47E-08 | 8.24E-07 |
| GK2     | -0.15622 | -1.21676 | 0.22501  | 0.33211  | 0.22787  | 0.335103 |
| GKN1    | -6.11078 | -11.0818 | 6.30E-23 | 3.70E-20 | 2.66E-23 | 1.79E-20 |
| GLA     | 0.940796 | 4.034525 | 7.57E-05 | 0.000419 | 6.99E-05 | 0.000388 |
| GLB1    | 0.195449 | 1.03599  | 0.301355 | 0.414489 | 0.300328 | 0.412973 |
| GLCCI1  | -0.35958 | -1.47278 | 0.142253 | 0.231184 | 0.140245 | 0.228792 |
| GLG1    | 0.705839 | 5.36631  | 2.05E-07 | 2.31E-06 | 2.33E-07 | 2.62E-06 |
| GLI1    | -0.45033 | -2.9454  | 0.003575 | 0.010862 | 0.003624 | 0.010996 |
| GLI3    | 0.692331 | 3.829484 | 0.000168 | 0.000821 | 0.000164 | 0.000807 |
| GLIPR1  | 0.60721  | 2.737054 | 0.006711 | 0.018502 | 0.006483 | 0.017935 |
| GLIS2   | -0.10524 | -0.41298 | 0.680029 | 0.766643 | 0.678397 | 0.764803 |
| GLIS3   | 1.564588 | 4.22219  | 3.55E-05 | 0.00022  | 3.10E-05 | 0.000194 |
| GLO1    | 0.151652 | 0.794979 | 0.427491 | 0.543322 | 0.426439 | 0.542132 |
| GLRX    | -0.37284 | -1.55118 | 0.12231  | 0.205306 | 0.12048  | 0.202813 |
| GLRX2   | 0.417117 | 2.485353 | 0.013694 | 0.033821 | 0.013663 | 0.03371  |
| GLS     | 0.702091 | 2.840556 | 0.00493  | 0.014321 | 0.00471  | 0.013731 |
| GLS2    | -0.51958 | -3.42427 | 0.000736 | 0.002896 | 0.00075  | 0.002923 |
| GLT25D1 | 0.502269 | 3.518997 | 0.000527 | 0.002168 | 0.000547 | 0.002247 |
| GLT25D2 | -0.01693 | -0.07864 | 0.937393 | 0.957377 | 0.937156 | 0.957321 |
| GLTP    | 0.713179 | 4.412941 | 1.60E-05 | 0.000109 | 1.61E-05 | 0.00011  |
| GLUD1   | 0.92861  | 4.633081 | 6.20E-06 | 4.72E-05 | 5.78E-06 | 4.46E-05 |
| GLUL    | 0.327694 | 1.375539 | 0.170376 | 0.267547 | 0.168316 | 0.26511  |
| GM2A    | 0.275417 | 1.505791 | 0.133568 | 0.220377 | 0.132915 | 0.219656 |
| GMEB1   | 0.389707 | 3.518685 | 0.000528 | 0.002168 | 0.000607 | 0.002454 |
| GMEB2   | 0.688869 | 6.309228 | 1.54E-09 | 3.05E-08 | 2.27E-09 | 4.30E-08 |
| GMFB    | 0.918474 | 5.141691 | 6.05E-07 | 6.10E-06 | 5.79E-07 | 5.86E-06 |
| GMFG    | -0.609   | -5.00091 | 1.17E-06 | 1.11E-05 | 1.39E-06 | 1.28E-05 |
| GMIP    | 0.103157 | 0.934017 | 0.351328 | 0.466585 | 0.356881 | 0.472091 |
| GMPPB   | 0.250157 | 1.699919 | 0.090573 | 0.161921 | 0.091365 | 0.163337 |
| GMPR    | 0.613636 | 2.066397 | 0.039973 | 0.082112 | 0.038701 | 0.079883 |



|        |          |          |          |          |          |          |
|--------|----------|----------|----------|----------|----------|----------|
| GNA11  | 0.808139 | 4.79805  | 2.97E-06 | 2.44E-05 | 2.92E-06 | 2.40E-05 |
| GNA12  | 0.106343 | 0.845516 | 0.39875  | 0.515011 | 0.401968 | 0.518131 |
| GNAI1  | 0.450733 | 1.360982 | 0.174925 | 0.273138 | 0.171903 | 0.269315 |
| GNAI3  | 0.349867 | 2.532593 | 0.012026 | 0.030097 | 0.012365 | 0.030962 |
| GNAL   | 0.792928 | 3.217733 | 0.001489 | 0.005191 | 0.001406 | 0.004953 |
| GNAO1  | 0.074412 | 0.514692 | 0.60729  | 0.706326 | 0.608347 | 0.706858 |
| GNAS   | -0.17975 | -0.4175  | 0.676725 | 0.76315  | 0.674282 | 0.76126  |
| GNAT1  | -0.4452  | -5.07756 | 8.19E-07 | 8.14E-06 | 1.40E-06 | 1.28E-05 |
| GNB1   | 0.049275 | 0.307261 | 0.758938 | 0.827833 | 0.759093 | 0.827781 |
| GNB2   | 0.448826 | 2.670882 | 0.008136 | 0.021677 | 0.008112 | 0.021614 |
| GNB2L1 | -0.1354  | -0.72432 | 0.469648 | 0.584417 | 0.468768 | 0.583477 |
| GNB3   | 0.159298 | 1.382316 | 0.168289 | 0.265244 | 0.172486 | 0.269759 |
| GNB5   | 0.184541 | 0.956263 | 0.339999 | 0.455269 | 0.33882  | 0.453949 |
| GNG10  | 1.227154 | 8.875396 | 2.59E-16 | 3.68E-14 | 3.01E-16 | 4.28E-14 |
| GNG11  | 0.787925 | 4.202135 | 3.86E-05 | 0.000236 | 3.70E-05 | 0.000227 |
| GNG3   | 0.962381 | 8.337822 | 8.54E-15 | 8.19E-13 | 1.34E-14 | 1.29E-12 |
| GNG7   | -0.16821 | -0.92696 | 0.354974 | 0.470496 | 0.354235 | 0.469781 |
| GNL1   | 0.232397 | 1.963405 | 0.050871 | 0.100925 | 0.052924 | 0.104513 |
| GNL2   | 0.320655 | 1.792791 | 0.074393 | 0.138859 | 0.074002 | 0.138184 |
| GNLY   | -0.91692 | -2.3171  | 0.021426 | 0.049052 | 0.020434 | 0.047056 |
| GNPAT  | 0.56912  | 3.547636 | 0.000476 | 0.00199  | 0.000478 | 0.001996 |
| GNRH1  | -0.57805 | -5.76493 | 2.77E-08 | 3.87E-07 | 4.33E-08 | 5.79E-07 |
| GNS    | 0.726466 | 3.000821 | 0.003006 | 0.009432 | 0.002863 | 0.009048 |
| GOLGA1 | 0.015813 | 0.108976 | 0.913322 | 0.940537 | 0.913569 | 0.940792 |
| GOLGA2 | 0.109124 | 0.848384 | 0.397155 | 0.513374 | 0.400045 | 0.516563 |
| GOLGA3 | 0.357859 | 2.349111 | 0.019712 | 0.04582  | 0.01991  | 0.046168 |
| GOLGA4 | -0.05072 | -0.31152 | 0.755705 | 0.825938 | 0.755791 | 0.825714 |
| GOLGA7 | 0.152612 | 0.931442 | 0.352656 | 0.467875 | 0.352765 | 0.46836  |
| GOLGB1 | 0.075142 | 0.54371  | 0.587197 | 0.689826 | 0.588724 | 0.691578 |
| GOLPH3 | 0.699419 | 4.137696 | 5.01E-05 | 0.000295 | 4.95E-05 | 0.00029  |
| GOPC   | 0.66389  | 3.632141 | 0.00035  | 0.001529 | 0.000342 | 0.001494 |
| GOSR1  | 0.606038 | 3.3328   | 0.00101  | 0.00372  | 0.00099  | 0.003648 |
| GOSR2  | 0.533395 | 4.132502 | 5.12E-05 | 0.0003   | 5.62E-05 | 0.000323 |
| GOT2   | 0.424781 | 3.023043 | 0.002802 | 0.008863 | 0.002897 | 0.009131 |
| GP2    | -0.01978 | -0.03304 | 0.97367  | 0.982239 | 0.973441 | 0.982134 |
| GPA33  | -0.39396 | -1.00508 | 0.315973 | 0.430206 | 0.312247 | 0.425752 |
| GPAA1  | 0.289347 | 1.719028 | 0.087029 | 0.156659 | 0.086929 | 0.156719 |
| GPC1   | 0.195027 | 1.080824 | 0.280969 | 0.392206 | 0.28027  | 0.39123  |
| GPC4   | -0.1724  | -0.54302 | 0.587673 | 0.689826 | 0.585124 | 0.688424 |
| GPC6   | 0.957756 | 3.470471 | 0.000626 | 0.002526 | 0.00058  | 0.00236  |
| GPD1   | 0.241074 | 1.563988 | 0.119271 | 0.201066 | 0.119797 | 0.201809 |

|         |          |          |          |          |          |          |
|---------|----------|----------|----------|----------|----------|----------|
| GPHN    | 0.166881 | 0.762168 | 0.446784 | 0.561917 | 0.444974 | 0.55979  |
| GPI     | -0.17721 | -0.9718  | 0.332227 | 0.447155 | 0.331447 | 0.446489 |
| GPKOW   | 0.18328  | 1.22139  | 0.223258 | 0.330439 | 0.224202 | 0.331213 |
| GPM6B   | 0.206879 | 0.663245 | 0.507875 | 0.620486 | 0.505019 | 0.617642 |
| GPNMB   | 2.027294 | 6.584846 | 3.35E-10 | 8.04E-09 | 2.54E-10 | 6.48E-09 |
| GPR108  | 0.216325 | 1.654474 | 0.09947  | 0.17477  | 0.101363 | 0.177103 |
| GPR109B | 0.614953 | 1.362271 | 0.174518 | 0.272605 | 0.171032 | 0.268391 |
| GPR133  | 0.376698 | 1.042473 | 0.298347 | 0.411232 | 0.294773 | 0.407621 |
| GPR135  | 0.150216 | 1.25228  | 0.21181  | 0.317242 | 0.215647 | 0.321351 |
| GPR155  | 0.718648 | 2.044964 | 0.04206  | 0.085799 | 0.040577 | 0.083244 |
| GPR160  | 1.526744 | 3.654386 | 0.000323 | 0.001426 | 0.000289 | 0.001297 |
| GPR3    | -0.68238 | -6.16322 | 3.41E-09 | 6.04E-08 | 4.84E-09 | 8.13E-08 |
| GPR35   | 0.599425 | 2.323499 | 0.021074 | 0.048433 | 0.020371 | 0.046955 |
| GPR4    | 0.40763  | 3.023365 | 0.002799 | 0.008863 | 0.002925 | 0.009201 |
| GPR55   | -0.31319 | -3.28921 | 0.001171 | 0.004206 | 0.001433 | 0.005037 |
| GPR56   | -0.35507 | -1.74234 | 0.082859 | 0.150304 | 0.081883 | 0.149225 |
| GPR65   | 0.509512 | 2.624505 | 0.009291 | 0.024301 | 0.009109 | 0.023876 |
| GPR75   | -0.6194  | -5.2198  | 4.17E-07 | 4.36E-06 | 5.12E-07 | 5.29E-06 |
| GPRC5B  | 1.099121 | 4.94747  | 1.50E-06 | 1.35E-05 | 1.35E-06 | 1.25E-05 |
| GPRC5C  | 0.703066 | 3.570775 | 0.000438 | 0.001851 | 0.000421 | 0.001783 |
| GPS1    | -0.33286 | -2.49332 | 0.013399 | 0.033233 | 0.013855 | 0.034094 |
| GPSM2   | 0.098015 | 0.396171 | 0.692366 | 0.776454 | 0.690861 | 0.775212 |
| GPSM3   | -0.02451 | -0.23569 | 0.813892 | 0.866235 | 0.816468 | 0.86819  |
| GPT     | 0.310923 | 2.200033 | 0.028855 | 0.062699 | 0.0294   | 0.063706 |
| GPT2    | -0.81203 | -2.40292 | 0.017102 | 0.040637 | 0.016324 | 0.039005 |
| GPX1    | 0.319161 | 1.670739 | 0.096208 | 0.170376 | 0.095435 | 0.169135 |
| GPX2    | 0.668572 | 1.900604 | 0.058673 | 0.113999 | 0.056846 | 0.111139 |
| GPX3    | 0.898664 | 2.325152 | 0.020983 | 0.048273 | 0.020016 | 0.046297 |
| GPX4    | -0.11827 | -0.6141  | 0.539792 | 0.648855 | 0.538817 | 0.647683 |
| GRAP2   | -0.03942 | -0.27099 | 0.786655 | 0.846641 | 0.787237 | 0.846879 |
| GRASP   | 0.309613 | 2.880236 | 0.00437  | 0.012943 | 0.004874 | 0.014115 |
| GRB10   | -0.09625 | -0.41997 | 0.674918 | 0.761944 | 0.673554 | 0.760732 |
| GRB14   | 0.183073 | 0.390552 | 0.69651  | 0.779799 | 0.694135 | 0.777981 |
| GRB2    | 0.724835 | 6.095092 | 4.91E-09 | 8.10E-08 | 6.36E-09 | 1.03E-07 |
| GRB7    | 0.416824 | 1.167824 | 0.244153 | 0.353305 | 0.240691 | 0.349449 |
| GREM1   | -0.76169 | -1.70678 | 0.089286 | 0.159987 | 0.086717 | 0.156456 |
| GRHPR   | 0.04862  | 0.291056 | 0.771285 | 0.83584  | 0.771259 | 0.83639  |
| GRIA3   | -0.16163 | -1.35342 | 0.177325 | 0.275969 | 0.181031 | 0.280899 |
| GRIK3   | -0.0527  | -0.54321 | 0.587539 | 0.689826 | 0.594074 | 0.695603 |
| GRIN1   | 0.3887   | 4.300895 | 2.57E-05 | 0.000164 | 3.73E-05 | 0.000228 |
| GRIN2C  | 0.209122 | 1.981541 | 0.048787 | 0.097367 | 0.051853 | 0.102787 |

|          |          |          |          |          |          |          |
|----------|----------|----------|----------|----------|----------|----------|
| GRIN2D   | 0.091746 | 0.457    | 0.648126 | 0.741166 | 0.647155 | 0.740416 |
| GRK5     | 0.312681 | 2.207243 | 0.02834  | 0.061835 | 0.028868 | 0.062732 |
| GRK6     | -0.35514 | -3.24958 | 0.001339 | 0.004742 | 0.00152  | 0.005296 |
| GRM3     | -0.35405 | -2.57749 | 0.010611 | 0.027208 | 0.010931 | 0.027862 |
| GRN      | 0.812833 | 4.509618 | 1.06E-05 | 7.62E-05 | 1.02E-05 | 7.41E-05 |
| GRP      | -1.10725 | -2.56732 | 0.010918 | 0.027798 | 0.010294 | 0.026511 |
| GRSF1    | -0.26972 | -1.65068 | 0.100244 | 0.175801 | 0.100325 | 0.175812 |
| GSK3B    | -0.19133 | -0.96222 | 0.337008 | 0.452275 | 0.335634 | 0.450363 |
| GSN      | -0.03753 | -0.28383 | 0.776808 | 0.839502 | 0.777962 | 0.840094 |
| GSPT1    | -0.04609 | -0.20002 | 0.841653 | 0.885157 | 0.840948 | 0.884615 |
| GSR      | 0.964139 | 4.585855 | 7.62E-06 | 5.64E-05 | 7.04E-06 | 5.30E-05 |
| GSS      | 0.356916 | 2.216725 | 0.027675 | 0.060615 | 0.027749 | 0.060717 |
| GSTA4    | 0.184033 | 0.753421 | 0.45201  | 0.56667  | 0.449729 | 0.564681 |
| GSTK1    | -0.46383 | -4.22282 | 3.54E-05 | 0.00022  | 4.31E-05 | 0.000259 |
| GSTM2    | 1.0231   | 2.94014  | 0.003634 | 0.011027 | 0.003395 | 0.010428 |
| GSTM3    | 1.309662 | 3.851703 | 0.000154 | 0.000768 | 0.000138 | 0.000699 |
| GSTM4    | 0.43187  | 1.507734 | 0.13307  | 0.21999  | 0.130662 | 0.216617 |
| GSTM5    | 0.472211 | 2.394855 | 0.017473 | 0.041392 | 0.017159 | 0.040614 |
| GSTO1    | -0.08829 | -0.66952 | 0.503873 | 0.616398 | 0.506171 | 0.618404 |
| GSTP1    | 0.107238 | 0.399357 | 0.690021 | 0.774749 | 0.688317 | 0.773021 |
| GSTT1    | -1.2984  | -1.74453 | 0.082477 | 0.149784 | 0.079764 | 0.146098 |
| GSTZ1    | -0.00818 | -0.03679 | 0.970687 | 0.980281 | 0.970566 | 0.980159 |
| GTF2A1   | 0.577979 | 5.453513 | 1.33E-07 | 1.57E-06 | 1.87E-07 | 2.15E-06 |
| GTF2A2   | -0.82934 | -3.10524 | 0.002154 | 0.007108 | 0.002028 | 0.00675  |
| GTF2B    | -0.12279 | -0.76163 | 0.447103 | 0.562168 | 0.447351 | 0.562179 |
| GTF2E1   | 0.364144 | 2.350496 | 0.019641 | 0.045677 | 0.019794 | 0.045964 |
| GTF2E2   | 0.5039   | 2.698844 | 0.007503 | 0.020233 | 0.00738  | 0.020004 |
| GTF2F2   | 0.610809 | 3.082877 | 0.002315 | 0.007566 | 0.002247 | 0.007386 |
| GTF2H1   | -0.32714 | -2.12997 | 0.034295 | 0.072151 | 0.034556 | 0.072636 |
| GTF2H2   | 0.487085 | 1.899878 | 0.058769 | 0.114138 | 0.057397 | 0.111853 |
| GTF2H4   | 0.144106 | 0.736409 | 0.462273 | 0.577271 | 0.461098 | 0.576219 |
| GTF2H5   | 0.107797 | 0.79704  | 0.426295 | 0.541949 | 0.428453 | 0.544398 |
| GTF2IRD1 | -0.27788 | -1.30635 | 0.192811 | 0.295954 | 0.191178 | 0.293544 |
| GTF3C1   | 0.354374 | 2.983247 | 0.003177 | 0.009849 | 0.003441 | 0.01053  |
| GTF3C2   | 0.289304 | 2.210818 | 0.028088 | 0.061401 | 0.028957 | 0.062892 |
| GTF3C3   | 1.03293  | 6.953798 | 4.08E-11 | 1.29E-09 | 4.31E-11 | 1.35E-09 |
| GTF3C4   | 0.408807 | 2.451659 | 0.015006 | 0.036469 | 0.014986 | 0.036437 |
| GTPBP1   | 0.029483 | 0.228783 | 0.819252 | 0.870363 | 0.820331 | 0.871115 |
| GTPBP4   | -0.3443  | -1.72858 | 0.085301 | 0.153843 | 0.084399 | 0.153157 |
| GTPBP5   | 0.13282  | 1.295604 | 0.196482 | 0.299826 | 0.203127 | 0.307075 |
| GTSE1    | 0.69614  | 3.630629 | 0.000352 | 0.001532 | 0.00034  | 0.00149  |

|         |          |          |          |          |          |          |
|---------|----------|----------|----------|----------|----------|----------|
| GUCA1B  | 0.118046 | 1.202726 | 0.230387 | 0.337117 | 0.238308 | 0.346764 |
| GUCY1A3 | 0.340678 | 1.378523 | 0.169455 | 0.266724 | 0.167263 | 0.263804 |
| GUCY1B3 | 0.159169 | 0.863314 | 0.388913 | 0.505362 | 0.38807  | 0.504513 |
| GUCY2C  | 1.358803 | 2.85748  | 0.004684 | 0.013673 | 0.004352 | 0.012872 |
| GUK1    | -0.13249 | -1.12262 | 0.262834 | 0.372757 | 0.267119 | 0.377167 |
| GUSB    | 0.246188 | 1.994801 | 0.04731  | 0.094701 | 0.048948 | 0.097772 |
| GYG2    | 0.991001 | 3.372348 | 0.000882 | 0.003331 | 0.000816 | 0.003133 |
| GZMA    | -0.92921 | -3.37666 | 0.000869 | 0.003295 | 0.000808 | 0.00311  |
| GZMB    | -0.32759 | -0.98451 | 0.325958 | 0.440483 | 0.32255  | 0.436757 |
| GZMH    | -0.4709  | -1.41075 | 0.159745 | 0.253993 | 0.156806 | 0.250421 |
| GZMK    | -1.17328 | -3.83927 | 0.000162 | 0.000796 | 0.000146 | 0.000733 |
| GZMM    | -0.72494 | -4.0944  | 5.96E-05 | 0.000341 | 5.82E-05 | 0.000333 |
| H1F0    | 0.564309 | 1.774566 | 0.077365 | 0.143156 | 0.075356 | 0.140095 |
| H2AFV   | 0.321871 | 2.091856 | 0.037609 | 0.077941 | 0.03788  | 0.078604 |
| H2AFX   | 0.326627 | 2.955806 | 0.003461 | 0.010564 | 0.00384  | 0.011546 |
| H2AFZ   | -0.0129  | -0.09917 | 0.921092 | 0.945638 | 0.921548 | 0.945939 |
| H3F3B   | -0.05    | -0.31757 | 0.751114 | 0.821941 | 0.751363 | 0.822213 |
| H6PD    | 0.218442 | 1.659544 | 0.098444 | 0.173616 | 0.100261 | 0.175765 |
| HA AO   | 0.215867 | 1.28207  | 0.20118  | 0.305508 | 0.201047 | 0.305306 |
| HABP4   | 0.500525 | 3.412954 | 0.000766 | 0.00297  | 0.000788 | 0.00305  |
| HADHA   | -0.21258 | -1.40146 | 0.162499 | 0.257239 | 0.16325  | 0.258167 |
| HAGH    | 0.031006 | 0.200879 | 0.840981 | 0.88482  | 0.841209 | 0.88469  |
| HARS2   | -0.44301 | -2.5618  | 0.011088 | 0.028199 | 0.011019 | 0.028039 |
| HAS3    | -0.4533  | -1.42382 | 0.155928 | 0.249358 | 0.153111 | 0.245772 |
| HAT1    | 0.176498 | 1.291885 | 0.197765 | 0.301491 | 0.199723 | 0.303785 |
| HBB     | 1.015715 | 1.445639 | 0.149714 | 0.241309 | 0.146121 | 0.236491 |
| HBEGF   | 0.237099 | 1.444909 | 0.149919 | 0.241557 | 0.149989 | 0.24167  |
| HBS1L   | 0.238369 | 1.277681 | 0.202721 | 0.307328 | 0.201832 | 0.306003 |
| HBXIP   | 0.38805  | 3.125075 | 0.002019 | 0.006731 | 0.002169 | 0.007168 |
| HBZ     | -0.25868 | -2.16936 | 0.031137 | 0.066489 | 0.032585 | 0.069112 |
| HCCS    | 0.220694 | 1.3555   | 0.176661 | 0.275209 | 0.176802 | 0.275247 |
| HCFC1   | 0.741493 | 6.10303  | 4.70E-09 | 7.87E-08 | 5.95E-09 | 9.71E-08 |
| HCFC1R1 | 0.172693 | 1.098745 | 0.273091 | 0.383716 | 0.273592 | 0.384087 |
| HCG9    | 0.417253 | 4.604442 | 7.03E-06 | 5.27E-05 | 1.07E-05 | 7.69E-05 |
| HCK     | -0.64219 | -3.63579 | 0.000346 | 0.00151  | 0.00034  | 0.001489 |
| HCLS1   | -0.4206  | -2.56843 | 0.010884 | 0.027787 | 0.010893 | 0.02778  |
| HCN2    | 0.023742 | 0.279851 | 0.779857 | 0.84125  | 0.785291 | 0.845892 |
| HCP5    | 0.308419 | 0.891899 | 0.373431 | 0.490121 | 0.369979 | 0.485999 |
| HCST    | -0.3637  | -2.32752 | 0.020854 | 0.048071 | 0.020991 | 0.048196 |
| HDAC1   | 0.149758 | 0.952387 | 0.341956 | 0.457498 | 0.342458 | 0.45778  |
| HDAC2   | 0.468893 | 3.674916 | 0.0003   | 0.001336 | 0.000325 | 0.001434 |

|           |           |          |          |          |          |          |
|-----------|-----------|----------|----------|----------|----------|----------|
| HDAC3     | -0.14226  | -1.17993 | 0.239313 | 0.347473 | 0.243175 | 0.351886 |
| HDAC4     | 0.576717  | 2.659589 | 0.008405 | 0.022292 | 0.00815  | 0.021701 |
| HDAC6     | 0.826236  | 7.304923 | 5.16E-12 | 2.11E-10 | 7.81E-12 | 3.11E-10 |
| HDGF      | 0.480939  | 3.64825  | 0.00033  | 0.001453 | 0.000354 | 0.001531 |
| HDGFRP3   | 1.202623  | 4.92472  | 1.67E-06 | 1.48E-05 | 1.47E-06 | 1.33E-05 |
| HDLBP     | 0.353422  | 1.601276 | 0.110764 | 0.189947 | 0.10931  | 0.187914 |
| HECA      | -0.21505  | -1.7231  | 0.086288 | 0.155444 | 0.088501 | 0.15896  |
| HECTD1    | 0.459815  | 2.225967 | 0.02704  | 0.059415 | 0.026527 | 0.058533 |
| HELZ      | 0.233112  | 1.478614 | 0.140687 | 0.229195 | 0.141068 | 0.229656 |
| HERC1     | 0.20346   | 1.261842 | 0.208354 | 0.313465 | 0.208591 | 0.313521 |
| HERC2     | -0.23035  | -2.13733 | 0.033684 | 0.071105 | 0.035933 | 0.075026 |
| HERC3     | -2.24E-05 | -0.00022 | 0.999824 | 0.999824 | 0.999827 | 0.999827 |
| HERPUD1   | -0.22019  | -1.25055 | 0.212439 | 0.317678 | 0.211952 | 0.317253 |
| HES1      | 0.332858  | 1.253232 | 0.211464 | 0.316825 | 0.208858 | 0.31382  |
| HES2      | -0.32638  | -2.52119 | 0.012411 | 0.031011 | 0.012922 | 0.032201 |
| HEXA      | 0.04805   | 0.318401 | 0.750486 | 0.821828 | 0.750955 | 0.822001 |
| HEXB      | 0.174978  | 1.07521  | 0.283469 | 0.394567 | 0.283638 | 0.39511  |
| HEY1      | 0.538394  | 2.366428 | 0.018837 | 0.044068 | 0.018315 | 0.042976 |
| HEY2      | 0.834163  | 3.290091 | 0.001168 | 0.004197 | 0.001097 | 0.003982 |
| HFE       | 0.956054  | 7.806371 | 2.44E-13 | 1.43E-11 | 3.34E-13 | 1.96E-11 |
| HGD       | 0.546418  | 1.557091 | 0.1209   | 0.203302 | 0.118205 | 0.199628 |
| HHEX      | 1.456746  | 4.284395 | 2.75E-05 | 0.000174 | 2.40E-05 | 0.000155 |
| HIBCH     | 0.370758  | 1.534701 | 0.126307 | 0.210886 | 0.124433 | 0.208034 |
| HIF1A     | 0.960401  | 6.996356 | 3.19E-11 | 1.03E-09 | 3.65E-11 | 1.16E-09 |
| HINT1     | -0.26239  | -1.86622 | 0.063353 | 0.121385 | 0.064295 | 0.123041 |
| HIP1      | 0.493735  | 2.688706 | 0.007727 | 0.020789 | 0.007616 | 0.020549 |
| HIPK3     | 1.017202  | 4.922371 | 1.69E-06 | 1.49E-05 | 1.55E-06 | 1.39E-05 |
| HIRIP3    | 0.246761  | 2.01968  | 0.044641 | 0.09028  | 0.046292 | 0.093131 |
| HIST1H1A  | 0.350662  | 2.411058 | 0.016735 | 0.039906 | 0.017026 | 0.040466 |
| HIST1H1C  | 1.796914  | 4.220569 | 3.58E-05 | 0.000221 | 3.09E-05 | 0.000194 |
| HIST1H2AC | 1.799205  | 4.970371 | 1.35E-06 | 1.24E-05 | 1.12E-06 | 1.06E-05 |
| HIST1H2AE | 1.249698  | 3.330449 | 0.001018 | 0.003742 | 0.000931 | 0.003466 |
| HIST1H2AM | 0.890509  | 3.573406 | 0.000434 | 0.001835 | 0.000404 | 0.001717 |
| HIST1H2BD | 1.175067  | 4.11301  | 5.53E-05 | 0.000321 | 4.96E-05 | 0.00029  |
| HIST1H2BK | 1.602764  | 4.493646 | 1.14E-05 | 8.10E-05 | 9.77E-06 | 7.14E-05 |
| HIST1H2BL | 0.384193  | 3.411134 | 0.000771 | 0.002982 | 0.000873 | 0.00329  |
| HIST1H4B  | 0.417448  | 2.950391 | 0.00352  | 0.01073  | 0.003629 | 0.010996 |
| HIST1H4C  | 2.129599  | 7.697568 | 4.77E-13 | 2.58E-11 | 3.39E-13 | 1.97E-11 |
| HIST1H4J  | -0.6192   | -2.45956 | 0.014689 | 0.035864 | 0.014166 | 0.034659 |
| HIST2H2BE | 1.682227  | 4.434963 | 1.46E-05 | 0.0001   | 1.25E-05 | 8.87E-05 |
| HIST3H2A  | 1.075609  | 4.988193 | 1.24E-06 | 1.16E-05 | 1.12E-06 | 1.06E-05 |

|          |          |          |          |          |          |          |
|----------|----------|----------|----------|----------|----------|----------|
| HIVEP1   | 0.298928 | 2.357201 | 0.019299 | 0.044993 | 0.020083 | 0.046407 |
| HIVEP2   | -0.20747 | -1.04285 | 0.298175 | 0.411232 | 0.296797 | 0.409316 |
| HK2      | 0.304829 | 1.298399 | 0.195522 | 0.298944 | 0.193428 | 0.296514 |
| HKR1     | -0.24526 | -2.00935 | 0.045733 | 0.092212 | 0.047418 | 0.094998 |
| HLA-C    | 0.482719 | 4.178737 | 4.24E-05 | 0.000255 | 4.98E-05 | 0.000291 |
| HLA-DMA  | 0.718971 | 2.744237 | 0.006571 | 0.018198 | 0.00627  | 0.017478 |
| HLA-DOA  | -0.28455 | -1.82797 | 0.06892  | 0.130457 | 0.069252 | 0.13098  |
| HLA-DOB  | 0.098657 | 0.569486 | 0.569613 | 0.675033 | 0.569316 | 0.674961 |
| HLA-DPA1 | -0.30974 | -1.05781 | 0.291314 | 0.404126 | 0.288246 | 0.40046  |
| HLA-DPB1 | 1.049667 | 3.584073 | 0.000417 | 0.001775 | 0.000383 | 0.001643 |
| HLA-DQA1 | 2.079238 | 3.619192 | 0.000367 | 0.001587 | 0.000326 | 0.001437 |
| HLA-DQB1 | 1.483232 | 2.739642 | 0.00666  | 0.018391 | 0.006208 | 0.017336 |
| HLA-DRB1 | 0.24546  | 1.071231 | 0.28525  | 0.396767 | 0.283105 | 0.394484 |
| HLA-F    | 0.155923 | 0.806234 | 0.420987 | 0.536798 | 0.419841 | 0.535084 |
| HLA-G    | 0.226574 | 1.547978 | 0.123078 | 0.206301 | 0.124051 | 0.207561 |
| HLF      | 0.462984 | 1.718226 | 0.087175 | 0.156848 | 0.085343 | 0.154452 |
| HM13     | -0.14645 | -1.08998 | 0.276927 | 0.388216 | 0.279251 | 0.390271 |
| HMG20A   | 0.067337 | 0.454316 | 0.650053 | 0.742828 | 0.650822 | 0.743525 |
| HMGA1    | 0.558829 | 3.638864 | 0.000342 | 0.001496 | 0.000348 | 0.001512 |
| HMGA2    | -0.07418 | -0.42471 | 0.671466 | 0.760089 | 0.671186 | 0.759406 |
| HMGB1    | 0.515781 | 4.380103 | 1.84E-05 | 0.000124 | 2.16E-05 | 0.000141 |
| HMGB3    | 0.077382 | 0.319667 | 0.749527 | 0.821351 | 0.748325 | 0.820322 |
| HMGCL    | 0.092767 | 0.6358   | 0.525573 | 0.635993 | 0.526699 | 0.636439 |
| HMGCR    | -0.44335 | -1.96856 | 0.050271 | 0.099862 | 0.049285 | 0.098278 |
| HMGCS1   | -0.72393 | -2.10542 | 0.036399 | 0.075866 | 0.035068 | 0.073481 |
| HMGCS2   | 0.715333 | 1.267988 | 0.206155 | 0.310853 | 0.202275 | 0.306233 |
| HMGN3    | 0.9282   | 3.8846   | 0.000136 | 0.000693 | 0.000126 | 0.000646 |
| HMGN4    | 0.232156 | 1.519907 | 0.129983 | 0.216026 | 0.130608 | 0.216604 |
| HMOX1    | -0.1291  | -0.38002 | 0.704304 | 0.78627  | 0.702287 | 0.784691 |
| HNF4A    | 0.6602   | 4.472547 | 1.24E-05 | 8.79E-05 | 1.29E-05 | 9.10E-05 |
| HNMT     | 0.700985 | 4.527856 | 9.80E-06 | 7.10E-05 | 9.99E-06 | 7.27E-05 |
| HNRPLL   | 0.830383 | 6.292643 | 1.69E-09 | 3.29E-08 | 1.98E-09 | 3.81E-08 |
| HOMER1   | 1.03207  | 3.189015 | 0.001638 | 0.005643 | 0.001518 | 0.005296 |
| HOMER2   | 0.565937 | 1.645654 | 0.101276 | 0.176819 | 0.098832 | 0.173779 |
| HOMER3   | 0.512956 | 2.883741 | 0.004324 | 0.012829 | 0.004271 | 0.012666 |
| HOOK1    | 0.770537 | 3.109197 | 0.002126 | 0.007042 | 0.002014 | 0.006713 |
| HOOK2    | 0.308665 | 1.602669 | 0.110456 | 0.189606 | 0.109588 | 0.188324 |
| HOXA2    | 1.251842 | 5.534044 | 8.94E-08 | 1.10E-06 | 7.79E-08 | 9.74E-07 |
| HOXA4    | 0.096924 | 0.528203 | 0.597896 | 0.697991 | 0.597274 | 0.697264 |
| HOXA5    | 0.56847  | 1.366012 | 0.173343 | 0.27148  | 0.169961 | 0.267163 |
| HOXB13   | -0.13452 | -0.49043 | 0.624326 | 0.720612 | 0.622265 | 0.718992 |

|          |          |          |          |          |          |          |
|----------|----------|----------|----------|----------|----------|----------|
| HOXB2    | 0.896066 | 2.772762 | 0.006039 | 0.016867 | 0.005697 | 0.016033 |
| HOXB4    | 0.854544 | 4.993544 | 1.21E-06 | 1.13E-05 | 1.18E-06 | 1.11E-05 |
| HOXB7    | 0.794834 | 1.777303 | 0.076913 | 0.142543 | 0.074543 | 0.138958 |
| HOXC9    | 0.35328  | 0.95246  | 0.341919 | 0.457498 | 0.338297 | 0.453377 |
| HPCA     | -0.49363 | -4.97505 | 1.32E-06 | 1.22E-05 | 1.90E-06 | 1.67E-05 |
| HPCAL1   | 0.082132 | 0.422811 | 0.67285  | 0.760771 | 0.672073 | 0.759861 |
| HPGD     | -1.25857 | -2.14083 | 0.033398 | 0.070643 | 0.031894 | 0.067982 |
| HPRT1    | 0.036172 | 0.284665 | 0.776171 | 0.839406 | 0.777589 | 0.840094 |
| HPS1     | 0.626943 | 4.497214 | 1.12E-05 | 8.02E-05 | 1.20E-05 | 8.54E-05 |
| HPS5     | 0.203281 | 1.148503 | 0.25202  | 0.361346 | 0.251476 | 0.360127 |
| HRAS     | -0.14855 | -0.78375 | 0.434036 | 0.550005 | 0.433032 | 0.548696 |
| HS2ST1   | 1.428688 | 7.846813 | 1.90E-13 | 1.13E-11 | 1.66E-13 | 1.02E-11 |
| HS3ST2   | 1.226653 | 3.862729 | 0.000148 | 0.000742 | 0.000133 | 0.000678 |
| HS3ST3A1 | -0.00643 | -0.01868 | 0.985116 | 0.990596 | 0.985009 | 0.990488 |
| HS3ST3B1 | 0.619202 | 2.27485  | 0.023887 | 0.053641 | 0.023066 | 0.052245 |
| HS6ST1   | 0.914154 | 7.506061 | 1.54E-12 | 6.88E-11 | 2.09E-12 | 9.11E-11 |
| HSBP1    | 0.476657 | 3.06249  | 0.002471 | 0.008005 | 0.002498 | 0.00804  |
| HSD11B2  | -0.38315 | -1.13292 | 0.258494 | 0.36749  | 0.255108 | 0.364218 |
| HSD17B2  | -0.35201 | -0.62892 | 0.530062 | 0.640105 | 0.526532 | 0.636439 |
| HSD17B3  | 0.821931 | 3.690205 | 0.000283 | 0.001279 | 0.000266 | 0.001213 |
| HSD17B4  | -0.16105 | -1.21229 | 0.226712 | 0.333296 | 0.229106 | 0.336121 |
| HSF2     | 0.234797 | 1.512409 | 0.131878 | 0.218634 | 0.132371 | 0.219005 |
| HSF2BP   | 0.460043 | 2.467146 | 0.01439  | 0.035189 | 0.014192 | 0.034705 |
| HSF4     | 0.009063 | 0.087416 | 0.930421 | 0.952511 | 0.931409 | 0.953125 |
| HSPA14   | 0.714392 | 3.670339 | 0.000305 | 0.001357 | 0.000293 | 0.001312 |
| HSPA1L   | 0.847836 | 7.873817 | 1.60E-13 | 9.79E-12 | 2.80E-13 | 1.66E-11 |
| HSPA5    | 0.72228  | 4.291145 | 2.67E-05 | 0.00017  | 2.64E-05 | 0.000168 |
| HSPA8    | -0.16481 | -1.33389 | 0.183631 | 0.284372 | 0.186869 | 0.28853  |
| HSPB2    | 0.188158 | 1.157159 | 0.248474 | 0.357571 | 0.248645 | 0.357817 |
| HSPB3    | -0.99236 | -2.85405 | 0.004733 | 0.013782 | 0.004437 | 0.013074 |
| HSPB7    | -0.10789 | -0.70103 | 0.48403  | 0.596471 | 0.484688 | 0.596656 |
| HSPBP1   | 0.433819 | 3.62923  | 0.000354 | 0.001539 | 0.000395 | 0.001685 |
| HSPD1    | 0.684508 | 1.749926 | 0.081538 | 0.148596 | 0.079209 | 0.145423 |
| HSPH1    | 0.605639 | 2.303189 | 0.022211 | 0.050651 | 0.021462 | 0.049063 |
| HTATIP2  | 0.389261 | 1.740716 | 0.083144 | 0.150705 | 0.081846 | 0.149216 |
| HTATSF1  | 0.46449  | 2.458693 | 0.014724 | 0.035911 | 0.014504 | 0.03539  |
| HTR2A    | 1.031584 | 4.322736 | 2.34E-05 | 0.000152 | 2.13E-05 | 0.00014  |
| HTR2B    | -1.29944 | -2.40618 | 0.016954 | 0.040326 | 0.016036 | 0.038492 |
| HTR3A    | 0.672847 | 3.279169 | 0.001212 | 0.004341 | 0.001166 | 0.004191 |
| HYAL1    | 1.037691 | 2.332797 | 0.02057  | 0.047487 | 0.019565 | 0.045567 |
| HYAL2    | 0.520986 | 3.741089 | 0.000234 | 0.001087 | 0.000246 | 0.001135 |

|        |          |          |          |          |          |          |
|--------|----------|----------|----------|----------|----------|----------|
| HYOU1  | 0.126231 | 0.598303 | 0.550259 | 0.657568 | 0.548837 | 0.656074 |
| IARS   | 0.038135 | 0.252714 | 0.800727 | 0.856577 | 0.801107 | 0.856897 |
| IBTK   | -0.05723 | -0.39158 | 0.695753 | 0.779137 | 0.696529 | 0.779716 |
| ICA1   | 0.445373 | 3.726132 | 0.000248 | 0.00114  | 0.000278 | 0.001252 |
| ICAM3  | -0.34765 | -1.47267 | 0.142283 | 0.231184 | 0.140393 | 0.228876 |
| ICMT   | 0.248807 | 1.577402 | 0.116153 | 0.197154 | 0.116497 | 0.197644 |
| ICOS   | -0.47114 | -2.31715 | 0.021423 | 0.049052 | 0.021011 | 0.048219 |
| ICOSLG | 0.298167 | 2.938416 | 0.003654 | 0.011079 | 0.004188 | 0.01245  |
| ICT1   | -0.13249 | -0.69428 | 0.488245 | 0.600092 | 0.487254 | 0.598717 |
| ID2    | 0.211006 | 0.838234 | 0.402818 | 0.519123 | 0.400326 | 0.51662  |
| ID3    | -0.18625 | -0.6733  | 0.501468 | 0.613938 | 0.498899 | 0.611268 |
| ID4    | 0.713776 | 2.627748 | 0.009206 | 0.024132 | 0.008799 | 0.023194 |
| IDE    | 0.583829 | 3.369306 | 0.000891 | 0.003356 | 0.000881 | 0.003311 |
| IDH2   | 0.097038 | 0.363582 | 0.716523 | 0.79671  | 0.714962 | 0.795531 |
| IDH3A  | 0.165036 | 0.835986 | 0.404078 | 0.520463 | 0.402788 | 0.518374 |
| IDH3G  | -0.0484  | -0.39383 | 0.694088 | 0.777644 | 0.696291 | 0.779716 |
| IDI1   | -0.56591 | -2.57004 | 0.010835 | 0.027677 | 0.010514 | 0.027046 |
| IDS    | 0.891806 | 6.800352 | 9.88E-11 | 2.82E-09 | 1.18E-10 | 3.29E-09 |
| IDUA   | 0.158948 | 1.382439 | 0.168251 | 0.265244 | 0.172485 | 0.269759 |
| IER2   | 0.233376 | 1.078852 | 0.281846 | 0.392846 | 0.279992 | 0.390957 |
| IER5   | 0.136492 | 0.55843  | 0.577124 | 0.682042 | 0.5752   | 0.67994  |
| IFI27  | 0.161467 | 0.533574 | 0.59418  | 0.69538  | 0.591759 | 0.693756 |
| IFI30  | -0.14165 | -0.73556 | 0.46279  | 0.577719 | 0.461713 | 0.576834 |
| IFI35  | 0.317399 | 1.580934 | 0.115343 | 0.19592  | 0.114258 | 0.194641 |
| IFI44L | -0.00828 | -0.02133 | 0.982998 | 0.989101 | 0.982868 | 0.98897  |
| IFIH1  | 0.489147 | 2.477033 | 0.014008 | 0.034434 | 0.013739 | 0.033862 |
| IFIT1  | 0.964939 | 3.259615 | 0.001294 | 0.004602 | 0.001203 | 0.004316 |
| IFIT2  | 0.841353 | 3.303874 | 0.001115 | 0.004031 | 0.001046 | 0.00383  |
| IFITM2 | 0.912476 | 5.471699 | 1.22E-07 | 1.44E-06 | 1.20E-07 | 1.43E-06 |
| IFNAR1 | 0.983615 | 7.623457 | 7.52E-13 | 3.68E-11 | 9.45E-13 | 4.49E-11 |
| IFNGR1 | -0.33782 | -1.56584 | 0.118836 | 0.200765 | 0.117423 | 0.198574 |
| IFNGR2 | 0.082738 | 0.45822  | 0.647251 | 0.74056  | 0.646775 | 0.740161 |
| IFRD2  | 0.501922 | 3.030929 | 0.002733 | 0.008691 | 0.002729 | 0.008678 |
| IGBP1  | 0.227866 | 1.479936 | 0.140334 | 0.2287   | 0.140911 | 0.229481 |
| IGF1   | 1.768652 | 5.571133 | 7.42E-08 | 9.32E-07 | 6.02E-08 | 7.79E-07 |
| IGF1R  | 1.672807 | 4.771762 | 3.34E-06 | 2.71E-05 | 2.83E-06 | 2.34E-05 |
| IGF2R  | 1.22338  | 8.012014 | 6.75E-14 | 4.74E-12 | 6.91E-14 | 5.15E-12 |
| IGFBP1 | -1.12311 | -3.61467 | 0.000374 | 0.001608 | 0.000341 | 0.00149  |
| IGFBP2 | -0.47195 | -0.88631 | 0.376426 | 0.493089 | 0.372378 | 0.488877 |
| IGFBP3 | 0.387606 | 1.034681 | 0.301964 | 0.415102 | 0.298321 | 0.410694 |
| IGFBP5 | 1.136264 | 4.454164 | 1.35E-05 | 9.41E-05 | 1.20E-05 | 8.59E-05 |



|         |          |          |          |          |          |          |
|---------|----------|----------|----------|----------|----------|----------|
| IGFBP6  | 0.639692 | 2.191553 | 0.029471 | 0.063743 | 0.028449 | 0.06196  |
| IGFBP7  | 0.353156 | 2.057426 | 0.040835 | 0.083701 | 0.040697 | 0.083454 |
| IGHMBP2 | 0.525223 | 3.734507 | 0.00024  | 0.001109 | 0.000252 | 0.001154 |
| IGSF3   | 0.280279 | 2.198316 | 0.028979 | 0.06291  | 0.029995 | 0.064579 |
| IGSF8   | -0.67479 | -3.25576 | 0.001311 | 0.004655 | 0.001261 | 0.0045   |
| IK      | 0.142336 | 1.077137 | 0.28261  | 0.393793 | 0.285167 | 0.397121 |
| IKBKB   | -0.25855 | -1.41076 | 0.159742 | 0.253993 | 0.159029 | 0.252993 |
| IL10RB  | 0.540512 | 2.666921 | 0.008229 | 0.021864 | 0.008027 | 0.021442 |
| IL11RA  | 0.662958 | 4.636031 | 6.12E-06 | 4.67E-05 | 6.47E-06 | 4.94E-05 |
| IL15    | 0.649408 | 3.226935 | 0.001444 | 0.005058 | 0.001395 | 0.004921 |
| IL15RA  | 0.742802 | 4.553504 | 8.77E-06 | 6.40E-05 | 8.76E-06 | 6.42E-05 |
| IL16    | -0.20618 | -1.2989  | 0.195349 | 0.298876 | 0.195721 | 0.299053 |
| IL18    | 0.78988  | 2.423334 | 0.016195 | 0.038835 | 0.015464 | 0.037292 |
| IL18R1  | 1.026096 | 3.295839 | 0.001145 | 0.004132 | 0.00106  | 0.003875 |
| IL18RAP | 0.682583 | 2.693962 | 0.00761  | 0.020498 | 0.007289 | 0.019807 |
| IL1A    | -0.56187 | -2.85596 | 0.004705 | 0.013719 | 0.00459  | 0.013449 |
| IL1B    | -0.0912  | -0.20807 | 0.83537  | 0.88052  | 0.834061 | 0.880077 |
| IL1F5   | -0.12638 | -1.28851 | 0.198935 | 0.302392 | 0.206591 | 0.311011 |
| IL1R1   | 1.236295 | 7.201992 | 9.52E-12 | 3.76E-10 | 8.88E-12 | 3.48E-10 |
| IL1R2   | 0.16955  | 0.305107 | 0.760576 | 0.828535 | 0.758584 | 0.827551 |
| IL1RAP  | 0.416755 | 2.126009 | 0.034627 | 0.072655 | 0.03414  | 0.071986 |
| IL23A   | -0.39472 | -2.57813 | 0.010592 | 0.027175 | 0.010707 | 0.027409 |
| IL27RA  | 0.416974 | 1.490173 | 0.137624 | 0.225456 | 0.135239 | 0.222324 |
| IL2RA   | 0.481917 | 2.535068 | 0.011944 | 0.029955 | 0.011748 | 0.029558 |
| IL2RG   | 0.312506 | 0.832735 | 0.405906 | 0.522101 | 0.40236  | 0.518203 |
| IL4R    | 0.444261 | 3.845202 | 0.000158 | 0.000783 | 0.000182 | 0.00088  |
| IL6ST   | 1.229702 | 6.465731 | 6.52E-10 | 1.45E-08 | 5.84E-10 | 1.30E-08 |
| IL7R    | 0.015301 | 0.048453 | 0.9614   | 0.974252 | 0.961138 | 0.973986 |
| ILF2    | -0.10278 | -0.65783 | 0.511338 | 0.623535 | 0.51184  | 0.624033 |
| ILF3    | 0.130713 | 0.748342 | 0.45506  | 0.569773 | 0.454649 | 0.569371 |
| ILK     | -0.03907 | -0.30674 | 0.759337 | 0.828048 | 0.760838 | 0.829069 |
| ILVBL   | 0.3827   | 2.230312 | 0.026746 | 0.058934 | 0.02664  | 0.058756 |
| IMMT    | -0.40076 | -3.07844 | 0.002348 | 0.007653 | 0.002481 | 0.008009 |
| IMP4    | 0.222869 | 1.626659 | 0.105254 | 0.182275 | 0.106739 | 0.184169 |
| IMPA1   | 0.017358 | 0.084684 | 0.93259  | 0.953907 | 0.932374 | 0.953679 |
| IMPA2   | -0.55901 | -1.76682 | 0.078658 | 0.144864 | 0.076638 | 0.141977 |
| IMPDH1  | 0.026241 | 0.162756 | 0.870861 | 0.905656 | 0.870932 | 0.90576  |
| IMPDH2  | 0.422795 | 3.615352 | 0.000373 | 0.001605 | 0.000419 | 0.001776 |
| ING1    | 0.009423 | 0.055881 | 0.955488 | 0.970048 | 0.955475 | 0.970225 |
| ING3    | 0.801418 | 4.996765 | 1.20E-06 | 1.13E-05 | 1.20E-06 | 1.13E-05 |
| ING5    | -0.00422 | -0.02197 | 0.982494 | 0.988806 | 0.982453 | 0.988764 |

|        |          |          |          |          |          |          |
|--------|----------|----------|----------|----------|----------|----------|
| INHBA  | -0.09525 | -0.29604 | 0.767482 | 0.833218 | 0.765925 | 0.832527 |
| INHBB  | 1.11255  | 2.876281 | 0.004423 | 0.013075 | 0.004128 | 0.012318 |
| INPP1  | 0.054462 | 0.237855 | 0.812217 | 0.86504  | 0.811398 | 0.864559 |
| INPP5A | -0.06938 | -0.3798  | 0.704465 | 0.78627  | 0.704006 | 0.78577  |
| INPP5B | 0.599255 | 3.995766 | 8.82E-05 | 0.000477 | 9.07E-05 | 0.000487 |
| INPP5D | -0.47615 | -3.37437 | 0.000876 | 0.003316 | 0.00091  | 0.003397 |
| INPP5E | 0.884192 | 5.156219 | 5.65E-07 | 5.73E-06 | 5.49E-07 | 5.61E-06 |
| INPLL1 | 0.178502 | 1.331275 | 0.184489 | 0.285606 | 0.186633 | 0.28826  |
| INSIG1 | -0.50149 | -1.75611 | 0.080473 | 0.147284 | 0.078602 | 0.144694 |
| INSM1  | -0.73355 | -1.57072 | 0.117698 | 0.199273 | 0.114705 | 0.195189 |
| INVS   | 0.18099  | 1.492772 | 0.136943 | 0.224888 | 0.140092 | 0.228623 |
| IPO11  | 1.088293 | 6.741424 | 1.38E-10 | 3.77E-09 | 1.36E-10 | 3.73E-09 |
| IPO8   | 0.519509 | 3.204808 | 0.001554 | 0.005395 | 0.001558 | 0.005381 |
| IQCE   | 0.399764 | 2.233563 | 0.026528 | 0.05848  | 0.026318 | 0.058099 |
| IQGAP1 | 0.134424 | 0.701281 | 0.483876 | 0.596438 | 0.482852 | 0.595488 |
| IQGAP2 | -0.21519 | -1.16285 | 0.246163 | 0.355225 | 0.245292 | 0.354113 |
| IQGAP3 | 0.219276 | 1.568215 | 0.118281 | 0.199972 | 0.119654 | 0.201641 |
| IRAK1  | -0.48355 | -2.737   | 0.006712 | 0.018502 | 0.006645 | 0.018338 |
| IRAK2  | -0.0704  | -0.44457 | 0.657069 | 0.747936 | 0.657363 | 0.747949 |
| IREB2  | 0.929883 | 5.042629 | 9.65E-07 | 9.41E-06 | 9.14E-07 | 8.97E-06 |
| IRF1   | -0.39554 | -1.70996 | 0.088697 | 0.159112 | 0.087247 | 0.157171 |
| IRF2   | 0.822021 | 4.138722 | 4.99E-05 | 0.000294 | 4.73E-05 | 0.00028  |
| IRF3   | -0.71007 | -5.92412 | 1.21E-08 | 1.83E-07 | 1.54E-08 | 2.28E-07 |
| IRF4   | 0.318556 | 2.745044 | 0.006555 | 0.018165 | 0.007073 | 0.019315 |
| IRF5   | 0.158639 | 0.487289 | 0.626543 | 0.722462 | 0.624145 | 0.72002  |
| IRF7   | 1.004188 | 3.86703  | 0.000145 | 0.000735 | 0.000133 | 0.000679 |
| IRF8   | -0.36538 | -1.27176 | 0.204813 | 0.309426 | 0.201989 | 0.306074 |
| IRX3   | 0.514841 | 1.172438 | 0.242301 | 0.351594 | 0.238519 | 0.346856 |
| IRX5   | -0.68502 | -1.868   | 0.063103 | 0.121105 | 0.061152 | 0.117986 |
| ISG20  | -0.38489 | -1.36229 | 0.174513 | 0.272605 | 0.171872 | 0.269315 |
| ISLR   | -0.28826 | -1.14095 | 0.255142 | 0.364046 | 0.252612 | 0.361313 |
| ISYNA1 | -0.16218 | -1.25565 | 0.210587 | 0.316014 | 0.213317 | 0.318585 |
| ITCH   | 0.810615 | 4.165751 | 4.47E-05 | 0.000267 | 4.26E-05 | 0.000257 |
| ITGA10 | 0.282991 | 1.683854 | 0.093641 | 0.166899 | 0.093547 | 0.166673 |
| ITGA2  | -0.08547 | -0.3177  | 0.751015 | 0.821941 | 0.749616 | 0.821066 |
| ITGA6  | 0.720365 | 3.309698 | 0.001093 | 0.003975 | 0.001043 | 0.00382  |
| ITGA7  | -0.03219 | -0.16384 | 0.87001  | 0.905258 | 0.869666 | 0.905054 |
| ITGA8  | 0.284989 | 1.062642 | 0.28912  | 0.401555 | 0.286332 | 0.398272 |
| ITGAE  | 0.013453 | 0.062889 | 0.949912 | 0.96657  | 0.949726 | 0.96653  |
| ITGAV  | 1.137884 | 4.947681 | 1.50E-06 | 1.35E-05 | 1.34E-06 | 1.24E-05 |
| ITGAX  | 0.234749 | 2.30254  | 0.022248 | 0.050687 | 0.024296 | 0.054434 |

|          |          |          |          |          |          |          |
|----------|----------|----------|----------|----------|----------|----------|
| ITGB1BP1 | 2.045977 | 4.744758 | 3.77E-06 | 3.04E-05 | 3.15E-06 | 2.57E-05 |
| ITGB2    | -0.31858 | -1.79242 | 0.074452 | 0.138913 | 0.07409  | 0.138293 |
| ITGB3    | 0.54497  | 3.736946 | 0.000238 | 0.001101 | 0.000246 | 0.001135 |
| ITGB3BP  | -0.14421 | -0.63985 | 0.52294  | 0.633621 | 0.521158 | 0.631986 |
| ITGB4    | -0.59052 | -2.57655 | 0.010639 | 0.02725  | 0.010291 | 0.026511 |
| ITGB5    | 0.65246  | 3.771039 | 0.000209 | 0.000988 | 0.000206 | 0.000972 |
| ITGB7    | -0.5003  | -3.18339 | 0.001668 | 0.005736 | 0.001683 | 0.005748 |
| ITGB8    | 0.119447 | 0.510771 | 0.610028 | 0.708284 | 0.608367 | 0.706858 |
| ITGBL1   | -1.59358 | -3.94763 | 0.000107 | 0.000559 | 9.39E-05 | 0.000503 |
| ITIH2    | 0.386799 | 1.256219 | 0.210381 | 0.315956 | 0.207352 | 0.311957 |
| ITIH4    | 0.617404 | 5.213791 | 4.29E-07 | 4.47E-06 | 5.28E-07 | 5.42E-06 |
| ITM2A    | 0.863864 | 2.673045 | 0.008085 | 0.021568 | 0.007655 | 0.020629 |
| ITM2C    | -0.86099 | -3.19237 | 0.00162  | 0.005597 | 0.001519 | 0.005296 |
| ITPK1    | 0.182677 | 2.077307 | 0.038945 | 0.080386 | 0.043607 | 0.088495 |
| ITPKA    | -0.54542 | -2.30325 | 0.022208 | 0.050651 | 0.021572 | 0.049289 |
| ITPR1    | 0.348764 | 1.914264 | 0.056896 | 0.111114 | 0.056488 | 0.110531 |
| ITPR2    | 0.78568  | 3.665993 | 0.00031  | 0.001374 | 0.000293 | 0.001312 |
| ITPR3    | -0.34092 | -2.71603 | 0.007137 | 0.019388 | 0.007528 | 0.020346 |
| ITSN2    | 0.224159 | 2.286373 | 0.023193 | 0.052432 | 0.025583 | 0.056824 |
| IVD      | -0.05072 | -0.28601 | 0.775138 | 0.839049 | 0.774885 | 0.838389 |
| IVNS1ABP | -0.16571 | -0.68623 | 0.493295 | 0.605191 | 0.491158 | 0.603041 |
| JAG2     | 0.198161 | 0.903841 | 0.367077 | 0.483403 | 0.365162 | 0.481284 |
| JAK1     | 0.194741 | 1.1532   | 0.250091 | 0.359238 | 0.249929 | 0.358787 |
| JAK2     | 0.440442 | 1.981023 | 0.048846 | 0.097443 | 0.047907 | 0.095774 |
| JAK3     | 0.028544 | 0.305087 | 0.760591 | 0.828535 | 0.765097 | 0.831819 |
| JAM3     | 0.385346 | 1.845835 | 0.066272 | 0.126258 | 0.065332 | 0.124518 |
| JMJD1C   | 0.720127 | 3.489753 | 0.000585 | 0.002378 | 0.00056  | 0.002288 |
| JPH3     | 0.219541 | 2.17555  | 0.030664 | 0.065809 | 0.0333   | 0.070341 |
| JTB      | 0.488612 | 4.184748 | 4.14E-05 | 0.00025  | 4.83E-05 | 0.000284 |
| JUN      | 1.129321 | 3.969165 | 9.79E-05 | 0.000524 | 8.85E-05 | 0.000478 |
| JUNB     | -0.34032 | -1.56562 | 0.118889 | 0.200782 | 0.117445 | 0.198574 |
| JUP      | 0.435784 | 1.27404  | 0.204006 | 0.308404 | 0.200769 | 0.304982 |
| KAL1     | -0.0209  | -0.1039  | 0.917345 | 0.943135 | 0.9171   | 0.943082 |
| KARS     | 0.296781 | 2.146551 | 0.032933 | 0.069791 | 0.03363  | 0.070975 |
| KATNA1   | 0.186566 | 1.249988 | 0.212644 | 0.31785  | 0.213632 | 0.318752 |
| KATNB1   | -0.49869 | -2.71804 | 0.007095 | 0.019323 | 0.006992 | 0.019138 |
| KCMF1    | 0.137041 | 0.806252 | 0.420976 | 0.536798 | 0.42077  | 0.536085 |
| KCNA3    | 0.058435 | 0.284368 | 0.776398 | 0.839446 | 0.775691 | 0.839067 |
| KCNA5    | 0.834978 | 3.140112 | 0.001923 | 0.006469 | 0.001809 | 0.006117 |
| KCNAB1   | 1.429183 | 7.484121 | 1.76E-12 | 7.78E-11 | 1.51E-12 | 6.83E-11 |
| KCNAB2   | 0.156287 | 1.259705 | 0.209123 | 0.31442  | 0.212426 | 0.31776  |

|          |          |          |          |          |          |          |
|----------|----------|----------|----------|----------|----------|----------|
| KCNB1    | 0.29825  | 1.834527 | 0.067939 | 0.128911 | 0.068027 | 0.129027 |
| KCND1    | 0.427224 | 2.759461 | 0.006282 | 0.017461 | 0.006345 | 0.017636 |
| KCNE3    | 1.881665 | 5.002886 | 1.16E-06 | 1.10E-05 | 9.61E-07 | 9.28E-06 |
| KCNF1    | -0.06928 | -0.50223 | 0.616015 | 0.713228 | 0.617475 | 0.714635 |
| KCNG1    | 0.078953 | 0.610267 | 0.54232  | 0.650895 | 0.544724 | 0.653519 |
| KCNH2    | -0.86141 | -3.48787 | 0.000589 | 0.00239  | 0.000551 | 0.002257 |
| KCNJ10   | -0.20234 | -1.6263  | 0.10533  | 0.18234  | 0.107819 | 0.185759 |
| KCNJ15   | -0.12138 | -0.31077 | 0.756275 | 0.826028 | 0.754456 | 0.824637 |
| KCNJ3    | -0.26069 | -1.16141 | 0.246743 | 0.355734 | 0.244737 | 0.353656 |
| KCNJ8    | 1.091558 | 4.643336 | 5.92E-06 | 4.55E-05 | 5.33E-06 | 4.15E-05 |
| KCNK1    | -0.24947 | -0.86003 | 0.390719 | 0.506649 | 0.38773  | 0.504382 |
| KCNK3    | 0.190128 | 0.609446 | 0.542864 | 0.651381 | 0.540148 | 0.648785 |
| KCNK5    | -0.91728 | -3.05806 | 0.002507 | 0.008108 | 0.002347 | 0.00766  |
| KCNK6    | 0.052453 | 0.212683 | 0.831773 | 0.878897 | 0.830923 | 0.878796 |
| KCNMA1   | -0.06477 | -0.29585 | 0.767624 | 0.833218 | 0.766726 | 0.832994 |
| KCNMB1   | -0.08141 | -0.53609 | 0.592444 | 0.694386 | 0.59311  | 0.695018 |
| KCNMB2   | 0.239644 | 1.571544 | 0.117507 | 0.199092 | 0.118115 | 0.199547 |
| KCNMB3   | 0.579247 | 2.772733 | 0.00604  | 0.016867 | 0.005863 | 0.016481 |
| KCNMB4   | 0.948914 | 3.502971 | 0.000558 | 0.002281 | 0.000517 | 0.002136 |
| KCNN3    | 0.809826 | 3.044328 | 0.002619 | 0.008385 | 0.002472 | 0.007997 |
| KCNN4    | 0.220054 | 0.690488 | 0.490622 | 0.602541 | 0.487655 | 0.599053 |
| KCNS1    | 0.242489 | 1.508654 | 0.132835 | 0.219823 | 0.133055 | 0.21981  |
| KCNS3    | -0.48273 | -1.21664 | 0.225058 | 0.33211  | 0.221474 | 0.328266 |
| KCTD15   | 0.869411 | 3.6804   | 0.000294 | 0.001315 | 0.000274 | 0.001243 |
| KCTD5    | -0.1752  | -0.90165 | 0.368236 | 0.484386 | 0.367023 | 0.482737 |
| KDELR1   | 0.300559 | 1.791244 | 0.074641 | 0.139102 | 0.074564 | 0.138958 |
| KDELR2   | 0.867811 | 6.033619 | 6.81E-09 | 1.09E-07 | 7.33E-09 | 1.17E-07 |
| KDR      | 1.436984 | 7.467029 | 1.95E-12 | 8.53E-11 | 1.66E-12 | 7.44E-11 |
| KEAP1    | -0.0479  | -0.35578 | 0.722352 | 0.800532 | 0.723631 | 0.801571 |
| KEL      | 0.230883 | 2.041068 | 0.042449 | 0.08648  | 0.04464  | 0.090318 |
| KHDRBS1  | 1.120161 | 9.771129 | 6.19E-19 | 1.26E-16 | 1.08E-18 | 2.42E-16 |
| KHDRBS3  | -0.06127 | -0.17575 | 0.860654 | 0.899305 | 0.859651 | 0.898457 |
| KHK      | -0.898   | -5.33393 | 2.40E-07 | 2.67E-06 | 2.35E-07 | 2.63E-06 |
| KIAA0182 | 0.516303 | 2.578998 | 0.010566 | 0.027123 | 0.010335 | 0.0266   |
| KIAA0196 | -0.18893 | -1.05599 | 0.29214  | 0.404683 | 0.291504 | 0.40427  |
| KIAA0319 | 1.00731  | 5.937833 | 1.13E-08 | 1.72E-07 | 1.09E-08 | 1.70E-07 |
| KIAA0368 | 0.46526  | 3.010026 | 0.00292  | 0.009192 | 0.002954 | 0.009257 |
| KIAA0528 | 0.093197 | 0.526408 | 0.59914  | 0.698922 | 0.598726 | 0.698613 |
| KIAA0556 | 0.256907 | 1.677488 | 0.09488  | 0.168788 | 0.095394 | 0.169126 |
| KIAA0664 | 0.171495 | 2.098281 | 0.037032 | 0.077082 | 0.042557 | 0.086513 |
| KIAA0753 | 0.719566 | 4.259672 | 3.05E-05 | 0.000191 | 3.01E-05 | 0.000189 |

|          |          |          |          |          |          |          |
|----------|----------|----------|----------|----------|----------|----------|
| KIAA0776 | 0.570083 | 3.090206 | 0.002261 | 0.007433 | 0.002217 | 0.007301 |
| KIAA0907 | -0.27834 | -1.52627 | 0.128392 | 0.213683 | 0.127766 | 0.212718 |
| KIAA0922 | -0.05537 | -0.3854  | 0.700318 | 0.783503 | 0.701202 | 0.784118 |
| KIAA1033 | -0.016   | -0.09767 | 0.922281 | 0.946118 | 0.9223   | 0.946052 |
| KIAA1217 | 0.397366 | 1.972604 | 0.049805 | 0.099019 | 0.04911  | 0.098021 |
| KIAA1324 | 0.798376 | 1.895366 | 0.059367 | 0.115157 | 0.05737  | 0.111853 |
| KIAA1407 | -0.62982 | -3.50743 | 0.000549 | 0.002247 | 0.000538 | 0.002216 |
| KIAA1632 | 0.659215 | 4.836554 | 2.50E-06 | 2.08E-05 | 2.72E-06 | 2.26E-05 |
| KIAA1704 | 1.199685 | 7.639664 | 6.81E-13 | 3.40E-11 | 6.79E-13 | 3.43E-11 |
| KIAA1715 | 1.087418 | 6.111549 | 4.49E-09 | 7.60E-08 | 4.21E-09 | 7.20E-08 |
| KIF11    | 0.692673 | 2.713296 | 0.007194 | 0.019519 | 0.006883 | 0.018896 |
| KIF1C    | 0.100587 | 0.452489 | 0.651367 | 0.743879 | 0.650018 | 0.743287 |
| KIF21A   | 0.188344 | 0.716945 | 0.474175 | 0.588383 | 0.471685 | 0.586022 |
| KIF21B   | 0.154714 | 0.728411 | 0.467144 | 0.582226 | 0.46552  | 0.580704 |
| KIF23    | -0.08195 | -0.42427 | 0.671784 | 0.760153 | 0.671029 | 0.759406 |
| KIF2C    | -0.20174 | -1.09563 | 0.274449 | 0.385393 | 0.273601 | 0.384087 |
| KIF3C    | 0.957255 | 7.119541 | 1.55E-11 | 5.64E-10 | 1.82E-11 | 6.48E-10 |
| KIF5B    | -0.14237 | -0.84118 | 0.401171 | 0.517568 | 0.400997 | 0.517344 |
| KIF5C    | -0.05598 | -0.28937 | 0.77257  | 0.836847 | 0.772025 | 0.836642 |
| KIFAP3   | -0.07587 | -0.35032 | 0.726436 | 0.80392  | 0.725422 | 0.80256  |
| KIFC1    | -0.02557 | -0.25173 | 0.801486 | 0.85705  | 0.80444  | 0.859679 |
| KIN      | 0.537684 | 3.164456 | 0.001776 | 0.006015 | 0.001764 | 0.005999 |
| KIT      | -0.05068 | -0.14811 | 0.88239  | 0.9151   | 0.881551 | 0.914431 |
| KLC2     | 1.285712 | 6.280639 | 1.80E-09 | 3.47E-08 | 1.57E-09 | 3.14E-08 |
| KLF10    | 1.13407  | 4.703805 | 4.53E-06 | 3.60E-05 | 4.05E-06 | 3.24E-05 |
| KLF11    | 0.883697 | 4.234323 | 3.38E-05 | 0.00021  | 3.16E-05 | 0.000197 |
| KLF12    | 0.648142 | 4.361559 | 1.99E-05 | 0.000132 | 2.06E-05 | 0.000136 |
| KLF3     | 0.257708 | 1.649368 | 0.100513 | 0.175943 | 0.100898 | 0.176489 |
| KLF4     | 1.335778 | 4.559048 | 8.56E-06 | 6.27E-05 | 7.48E-06 | 5.58E-05 |
| KLF5     | 0.085744 | 0.327111 | 0.743898 | 0.816951 | 0.742509 | 0.815753 |
| KLF6     | 0.374919 | 1.673401 | 0.095683 | 0.16983  | 0.094279 | 0.167655 |
| KLF7     | 1.216528 | 4.68724  | 4.88E-06 | 3.83E-05 | 4.30E-06 | 3.42E-05 |
| KLF8     | 0.567518 | 5.002528 | 1.16E-06 | 1.10E-05 | 1.47E-06 | 1.33E-05 |
| KLHDC3   | 0.056649 | 0.277388 | 0.781745 | 0.842707 | 0.78107  | 0.842559 |
| KLHDC4   | 0.478196 | 4.022557 | 7.94E-05 | 0.000435 | 9.07E-05 | 0.000487 |
| KLHL3    | -0.40748 | -2.83708 | 0.004982 | 0.014419 | 0.005109 | 0.014696 |
| KLHL5    | 1.939904 | 7.739191 | 3.69E-13 | 2.07E-11 | 2.71E-13 | 1.63E-11 |
| KLHL7    | 0.185969 | 0.63592  | 0.525495 | 0.635993 | 0.522861 | 0.633526 |
| KLHL8    | 1.116292 | 5.314316 | 2.64E-07 | 2.91E-06 | 2.37E-07 | 2.65E-06 |
| KLHL9    | 0.23947  | 1.71125  | 0.088457 | 0.158744 | 0.089636 | 0.160613 |
| KLK11    | 1.436998 | 2.815174 | 0.005322 | 0.015186 | 0.004948 | 0.014293 |

|         |          |          |          |          |          |          |
|---------|----------|----------|----------|----------|----------|----------|
| KLK6    | 1.280834 | 2.39     | 0.017699 | 0.041782 | 0.016753 | 0.039909 |
| KLK7    | 1.404798 | 2.826434 | 0.005145 | 0.014807 | 0.004783 | 0.013919 |
| KLKB1   | -1.07374 | -7.0721  | 2.05E-11 | 7.07E-10 | 2.12E-11 | 7.26E-10 |
| KLRB1   | 0.053297 | 0.176116 | 0.860367 | 0.899205 | 0.859459 | 0.898456 |
| KLRC3   | -0.15884 | -0.57244 | 0.567613 | 0.673483 | 0.56528  | 0.670913 |
| KLRG1   | -0.00651 | -0.03337 | 0.973411 | 0.982188 | 0.973343 | 0.982134 |
| KNDC1   | -0.45647 | -3.96706 | 9.87E-05 | 0.000527 | 0.000115 | 0.000596 |
| KPNA4   | 0.526956 | 3.477006 | 0.000612 | 0.002475 | 0.000624 | 0.002518 |
| KPNA6   | 0.827969 | 5.489014 | 1.12E-07 | 1.34E-06 | 1.16E-07 | 1.39E-06 |
| KPNB1   | 0.549263 | 3.604161 | 0.000388 | 0.001664 | 0.000396 | 0.001685 |
| KPTN    | 1.078729 | 6.258709 | 2.03E-09 | 3.88E-08 | 1.93E-09 | 3.75E-08 |
| KRAS    | 1.011173 | 4.308236 | 2.49E-05 | 0.00016  | 2.27E-05 | 0.000148 |
| KRT10   | 0.704577 | 3.705198 | 0.000268 | 0.001215 | 0.000259 | 0.001183 |
| KRT13   | -1.59184 | -3.52754 | 0.000511 | 0.00211  | 0.00046  | 0.001931 |
| KRT14   | -1.05086 | -3.40957 | 0.000775 | 0.002991 | 0.000714 | 0.002812 |
| KRT15   | -1.23067 | -3.11648 | 0.002077 | 0.006892 | 0.001915 | 0.006431 |
| KRT16   | -1.05216 | -2.99838 | 0.003029 | 0.009486 | 0.002822 | 0.008931 |
| KRT19   | -1.06807 | -4.10126 | 5.80E-05 | 0.000333 | 5.26E-05 | 0.000304 |
| KRT20   | -2.41871 | -3.76101 | 0.000217 | 0.001018 | 0.000191 | 0.000914 |
| KRT7    | 0.131527 | 0.598418 | 0.550183 | 0.657568 | 0.548578 | 0.656074 |
| KRT8    | -0.36667 | -2.18477 | 0.029972 | 0.064618 | 0.029923 | 0.064453 |
| KRTCAP2 | 0.362995 | 3.714635 | 0.000259 | 0.001185 | 0.000326 | 0.001435 |
| KTN1    | 0.335748 | 2.069626 | 0.039666 | 0.081553 | 0.039734 | 0.081836 |
| KYNU    | -0.5691  | -1.8198  | 0.07016  | 0.132485 | 0.068283 | 0.12946  |
| LICAM   | 0.337545 | 1.213766 | 0.226151 | 0.332686 | 0.223352 | 0.330319 |
| LACTB   | 0.677554 | 3.240014 | 0.001382 | 0.004877 | 0.001328 | 0.004714 |
| LACTB2  | 0.419425 | 1.215353 | 0.225546 | 0.332455 | 0.222206 | 0.328935 |
| LAD1    | 0.131066 | 0.621781 | 0.534736 | 0.643844 | 0.533283 | 0.642181 |
| LAIR1   | 0.286911 | 2.454289 | 0.0149   | 0.036266 | 0.015835 | 0.038108 |
| LAIR2   | 0.370914 | 1.298435 | 0.19551  | 0.298944 | 0.192739 | 0.295747 |
| LAMA2   | 0.355246 | 1.496869 | 0.135874 | 0.223289 | 0.134001 | 0.220998 |
| LAMA3   | 0.234626 | 1.536086 | 0.125967 | 0.210393 | 0.126583 | 0.211224 |
| LAMA5   | -0.40444 | -1.7834  | 0.075913 | 0.141105 | 0.074637 | 0.139038 |
| LAMB1   | 0.593693 | 2.472986 | 0.014163 | 0.034707 | 0.013692 | 0.033763 |
| LAMC1   | 1.246744 | 8.460857 | 3.87E-15 | 4.14E-13 | 4.11E-15 | 4.40E-13 |
| LAMC3   | 0.454926 | 3.970957 | 9.72E-05 | 0.000521 | 0.000113 | 0.00059  |
| LAMP1   | 0.288993 | 1.329076 | 0.185212 | 0.286348 | 0.183492 | 0.28425  |
| LAMP2   | 1.577173 | 8.80184  | 4.20E-16 | 5.64E-14 | 3.57E-16 | 4.79E-14 |
| LANCL1  | 1.283495 | 6.161396 | 3.44E-09 | 6.08E-08 | 2.99E-09 | 5.46E-08 |
| LANCL2  | 0.378936 | 1.564425 | 0.119168 | 0.201066 | 0.117335 | 0.198574 |
| LAPTM5  | -0.06307 | -0.406   | 0.685141 | 0.770933 | 0.685533 | 0.770814 |

|          |          |          |          |          |          |          |
|----------|----------|----------|----------|----------|----------|----------|
| LARGE    | -0.27953 | -1.99895 | 0.046856 | 0.094031 | 0.047668 | 0.095377 |
| LARS2    | 1.009568 | 5.716071 | 3.56E-08 | 4.85E-07 | 3.38E-08 | 4.63E-07 |
| LASP1    | 0.185331 | 1.048378 | 0.295625 | 0.408779 | 0.295083 | 0.407636 |
| LASS6    | 0.94279  | 3.741106 | 0.000234 | 0.001087 | 0.000217 | 0.001014 |
| LATS2    | 0.784334 | 5.760977 | 2.83E-08 | 3.94E-07 | 3.17E-08 | 4.36E-07 |
| LBR      | 0.234808 | 1.271564 | 0.204883 | 0.309431 | 0.204061 | 0.308189 |
| LCAT     | 0.216536 | 2.216475 | 0.027692 | 0.060615 | 0.030421 | 0.065316 |
| LCK      | -0.90013 | -3.76407 | 0.000215 | 0.001009 | 0.0002   | 0.000948 |
| LCN2     | -0.64438 | -1.10214 | 0.271617 | 0.382468 | 0.267484 | 0.377417 |
| LCP1     | -0.31919 | -1.86966 | 0.062871 | 0.120857 | 0.062719 | 0.120515 |
| LCP2     | 0.079321 | 0.573745 | 0.566732 | 0.672806 | 0.568313 | 0.674003 |
| LDB2     | 1.298996 | 5.489748 | 1.11E-07 | 1.34E-06 | 9.62E-08 | 1.17E-06 |
| LDB3     | 0.141533 | 0.769216 | 0.442598 | 0.558146 | 0.441801 | 0.557142 |
| LDHA     | 0.171996 | 1.274183 | 0.203955 | 0.308404 | 0.20608  | 0.310441 |
| LDHB     | -0.19711 | -0.57227 | 0.567732 | 0.673483 | 0.564938 | 0.67091  |
| LDLR     | -0.24094 | -1.65162 | 0.100051 | 0.175588 | 0.100956 | 0.176523 |
| LEFTY2   | 0.470925 | 2.251426 | 0.025356 | 0.056426 | 0.024843 | 0.055476 |
| LEMD3    | 1.013427 | 5.855469 | 1.73E-08 | 2.52E-07 | 1.66E-08 | 2.45E-07 |
| LEPR     | 0.916693 | 2.539073 | 0.011812 | 0.029688 | 0.011198 | 0.028448 |
| LEPRE1   | 0.713838 | 4.403856 | 1.67E-05 | 0.000113 | 1.67E-05 | 0.000113 |
| LEPREL1  | -0.27615 | -1.05598 | 0.292147 | 0.404683 | 0.289447 | 0.401654 |
| LEPROTL1 | -0.42002 | -2.62972 | 0.009154 | 0.02401  | 0.009195 | 0.024064 |
| LETM1    | 0.132071 | 0.944199 | 0.346113 | 0.461636 | 0.347926 | 0.46403  |
| LFNG     | 0.483911 | 2.200577 | 0.028816 | 0.062643 | 0.028169 | 0.061407 |
| LGALS2   | 0.924394 | 1.77202  | 0.077788 | 0.143712 | 0.075303 | 0.140057 |
| LGALS3   | 0.533687 | 2.716553 | 0.007126 | 0.019371 | 0.006968 | 0.019084 |
| LGALS3BP | 0.661179 | 3.17036  | 0.001741 | 0.005922 | 0.001676 | 0.00573  |
| LGALS4   | -0.82067 | -1.76247 | 0.079391 | 0.14566  | 0.07695  | 0.142453 |
| LGALS9   | -0.26954 | -1.23961 | 0.216454 | 0.322451 | 0.214657 | 0.320078 |
| LGI4     | 0.144092 | 1.465925 | 0.14411  | 0.233477 | 0.150917 | 0.242997 |
| LGMN     | 0.350753 | 1.671427 | 0.096072 | 0.170239 | 0.094902 | 0.168443 |
| LGR5     | 0.120164 | 0.21963  | 0.826365 | 0.875347 | 0.824903 | 0.873996 |
| LHFP     | 0.087731 | 0.484667 | 0.628399 | 0.723891 | 0.627888 | 0.72348  |
| LHFPL2   | 0.431413 | 2.296306 | 0.022608 | 0.051358 | 0.022321 | 0.050878 |
| LIAS     | -0.35186 | -1.29582 | 0.196409 | 0.299813 | 0.193786 | 0.296869 |
| LIFR     | 2.009257 | 5.370921 | 2.00E-07 | 2.27E-06 | 1.62E-07 | 1.87E-06 |
| LIG1     | -0.42179 | -2.552   | 0.011395 | 0.028823 | 0.01139  | 0.028829 |
| LIG3     | -0.17329 | -0.9248  | 0.356094 | 0.471715 | 0.355122 | 0.470426 |
| LIG4     | 0.581293 | 3.296132 | 0.001144 | 0.004131 | 0.001128 | 0.004078 |
| LILRB2   | 0.481711 | 2.605369 | 0.00981  | 0.025459 | 0.009669 | 0.025136 |
| LILRB3   | 0.285815 | 2.6097   | 0.00969  | 0.025176 | 0.010563 | 0.027128 |

|           |          |          |          |          |          |          |
|-----------|----------|----------|----------|----------|----------|----------|
| LILRB4    | -0.02361 | -0.17912 | 0.858011 | 0.897142 | 0.85877  | 0.898136 |
| LIMD1     | 0.505378 | 2.893402 | 0.004198 | 0.012487 | 0.004158 | 0.012389 |
| LIMK1     | 0.02541  | 0.209893 | 0.833947 | 0.880214 | 0.835271 | 0.880415 |
| LIMK2     | -0.03396 | -0.14035 | 0.88851  | 0.920431 | 0.88796  | 0.919862 |
| LIMS1     | 0.021628 | 0.167204 | 0.867364 | 0.904338 | 0.868148 | 0.904472 |
| LIMS3     | 0.571103 | 3.182975 | 0.001671 | 0.005739 | 0.001643 | 0.005634 |
| LIN7A     | -0.10347 | -0.53778 | 0.59128  | 0.693509 | 0.590393 | 0.692846 |
| LIPA      | 0.31377  | 1.518143 | 0.130427 | 0.216687 | 0.129144 | 0.214479 |
| LIPC      | 1.737303 | 3.930547 | 0.000114 | 0.000593 | 0.0001   | 0.000531 |
| LIPG      | 0.484716 | 1.016989 | 0.310286 | 0.423962 | 0.306297 | 0.419952 |
| LITAF     | 0.755067 | 3.145094 | 0.001892 | 0.006383 | 0.001795 | 0.006087 |
| LMAN1     | -0.1016  | -0.52924 | 0.597175 | 0.697496 | 0.59631  | 0.697005 |
| LMCD1     | 0.435969 | 1.266364 | 0.206734 | 0.311511 | 0.203472 | 0.307498 |
| LMLN      | 0.335443 | 2.441256 | 0.015434 | 0.037348 | 0.015857 | 0.038142 |
| LMNA      | 0.320295 | 1.697959 | 0.090942 | 0.162521 | 0.090249 | 0.161465 |
| LMNB2     | -0.08311 | -0.5098  | 0.610705 | 0.708895 | 0.610825 | 0.708859 |
| LMO7      | -0.27463 | -1.09773 | 0.273533 | 0.384222 | 0.271018 | 0.381487 |
| LMOD1     | 0.096706 | 0.575926 | 0.565259 | 0.671397 | 0.565174 | 0.670913 |
| LNPEP     | 1.367909 | 6.750167 | 1.32E-10 | 3.62E-09 | 1.13E-10 | 3.21E-09 |
| LOC283174 | -0.34755 | -2.70499 | 0.00737  | 0.019955 | 0.007727 | 0.020753 |
| LOC285033 | 0.691703 | 4.901465 | 1.86E-06 | 1.62E-05 | 1.99E-06 | 1.73E-05 |
| LOXL2     | 0.071021 | 0.595425 | 0.552177 | 0.65902  | 0.555596 | 0.662431 |
| LPHN3     | 0.779837 | 2.608457 | 0.009724 | 0.025251 | 0.009257 | 0.024199 |
| LPIN2     | 0.380385 | 1.613209 | 0.108146 | 0.186185 | 0.106479 | 0.183855 |
| LPL       | 3.165429 | 6.328708 | 1.39E-09 | 2.79E-08 | 1.01E-09 | 2.11E-08 |
| LPP       | 1.622622 | 8.765047 | 5.34E-16 | 6.61E-14 | 4.42E-16 | 5.61E-14 |
| LPPR2     | 0.226848 | 2.251513 | 0.02535  | 0.056426 | 0.027679 | 0.060621 |
| LPXN      | -0.45808 | -3.83286 | 0.000166 | 0.000813 | 0.000187 | 0.000899 |
| LRBA      | 0.119884 | 0.594125 | 0.553045 | 0.659556 | 0.551844 | 0.658793 |
| LRCH3     | 0.512784 | 3.405566 | 0.000786 | 0.003025 | 0.000802 | 0.003096 |
| LRCH4     | 0.466755 | 3.953838 | 0.000104 | 0.000549 | 0.000119 | 0.000616 |
| LRFN3     | 1.359066 | 6.403549 | 9.20E-10 | 1.96E-08 | 7.85E-10 | 1.69E-08 |
| LRMP      | -0.64725 | -1.62527 | 0.10555  | 0.182653 | 0.102863 | 0.178836 |
| LRP11     | 0.962568 | 4.026919 | 7.80E-05 | 0.000429 | 7.18E-05 | 0.000398 |
| LRP3      | 0.241043 | 1.386026 | 0.167155 | 0.263634 | 0.166788 | 0.263231 |
| LRP4      | 0.36716  | 0.923602 | 0.356715 | 0.472137 | 0.352988 | 0.468524 |
| LRP5      | 0.130132 | 0.866971 | 0.386911 | 0.503735 | 0.387885 | 0.504444 |
| LRPAP1    | -0.06666 | -0.39806 | 0.690977 | 0.775081 | 0.690928 | 0.775212 |
| LRPPRC    | -0.21722 | -1.28851 | 0.198934 | 0.302392 | 0.198791 | 0.302858 |
| LRRC17    | 0.109463 | 0.419793 | 0.67505  | 0.761944 | 0.673341 | 0.760732 |
| LRRFIP1   | -0.10801 | -0.69568 | 0.487373 | 0.599334 | 0.487946 | 0.599255 |



|         |          |          |          |          |          |          |
|---------|----------|----------|----------|----------|----------|----------|
| LRRFIP2 | -0.72364 | -3.7931  | 0.000193 | 0.000922 | 0.000186 | 0.000896 |
| LRRK2   | 0.575135 | 2.435814 | 0.015661 | 0.037736 | 0.015169 | 0.036807 |
| LRSAM1  | -0.03825 | -0.2911  | 0.771252 | 0.83584  | 0.772475 | 0.836937 |
| LSAMP   | 1.213007 | 6.178383 | 3.14E-09 | 5.72E-08 | 2.80E-09 | 5.14E-08 |
| LSM1    | 0.17682  | 1.079975 | 0.281346 | 0.392423 | 0.281459 | 0.392773 |
| LSM10   | 0.317078 | 2.63093  | 0.009123 | 0.023966 | 0.009692 | 0.025182 |
| LSM11   | 0.627318 | 3.975642 | 9.55E-05 | 0.000513 | 9.65E-05 | 0.000514 |
| LSM3    | 0.257758 | 1.715633 | 0.08765  | 0.157535 | 0.088277 | 0.158662 |
| LSM4    | -0.98408 | -5.57653 | 7.22E-08 | 9.11E-07 | 6.88E-08 | 8.65E-07 |
| LSM5    | 1.216522 | 6.446155 | 7.27E-10 | 1.61E-08 | 6.54E-10 | 1.44E-08 |
| LSM6    | 1.037391 | 6.992598 | 3.26E-11 | 1.05E-09 | 3.44E-11 | 1.12E-09 |
| LSM7    | -0.20116 | -1.35579 | 0.176569 | 0.275157 | 0.177559 | 0.276151 |
| LSS     | -0.34802 | -1.70257 | 0.090074 | 0.161275 | 0.089042 | 0.159793 |
| LST1    | 0.000863 | 0.005356 | 0.995731 | 0.997641 | 0.995734 | 0.997644 |
| LTA4H   | 0.285607 | 1.349923 | 0.178441 | 0.27743  | 0.176874 | 0.275267 |
| LTB     | -0.11738 | -0.61695 | 0.537913 | 0.647093 | 0.537004 | 0.646    |
| LTBP1   | 0.085554 | 0.39851  | 0.690644 | 0.774893 | 0.68954  | 0.774024 |
| LTBR    | 0.001262 | 0.012469 | 0.990063 | 0.99433  | 0.990216 | 0.994345 |
| LTF     | -2.22924 | -3.6391  | 0.000342 | 0.001496 | 0.000303 | 0.001347 |
| LUM     | 0.759474 | 3.600786 | 0.000393 | 0.00168  | 0.000374 | 0.001608 |
| LUZP1   | 0.773921 | 5.797363 | 2.34E-08 | 3.34E-07 | 2.67E-08 | 3.75E-07 |
| LY6E    | -0.42963 | -1.47758 | 0.140964 | 0.229549 | 0.138459 | 0.226351 |
| LY6G5C  | 0.432768 | 2.150929 | 0.032582 | 0.069198 | 0.032055 | 0.068265 |
| LY75    | 0.826123 | 2.268201 | 0.024297 | 0.054438 | 0.023253 | 0.052645 |
| LY9     | -0.36774 | -1.99765 | 0.046997 | 0.094235 | 0.046599 | 0.093557 |
| LY96    | 0.382806 | 1.522725 | 0.129277 | 0.215004 | 0.127255 | 0.212016 |
| LYN     | -0.36196 | -1.63798 | 0.102867 | 0.179066 | 0.10146  | 0.177128 |
| LYNX1   | 0.388468 | 2.966123 | 0.003352 | 0.01029  | 0.003524 | 0.010734 |
| LYPLA2  | 0.232419 | 1.746248 | 0.082177 | 0.149482 | 0.083728 | 0.152057 |
| LYPLAL1 | 0.58539  | 3.056042 | 0.002523 | 0.008144 | 0.002461 | 0.007967 |
| LYZ     | 0.036547 | 0.068685 | 0.945303 | 0.963549 | 0.944839 | 0.963076 |
| M6PR    | -0.02099 | -0.13009 | 0.896617 | 0.927807 | 0.896673 | 0.927865 |
| MAD1L1  | -0.2922  | -0.89756 | 0.370408 | 0.486697 | 0.367086 | 0.482737 |
| MAD2L1  | -0.32423 | -1.52752 | 0.128081 | 0.213309 | 0.12669  | 0.211224 |
| MADCAM1 | 0.7617   | 3.026008 | 0.002776 | 0.008804 | 0.002633 | 0.008419 |
| MADD    | 0.236765 | 2.183367 | 0.030076 | 0.064764 | 0.032116 | 0.068363 |
| MAF     | -0.11439 | -0.61749 | 0.537559 | 0.646833 | 0.536809 | 0.646    |
| MAFB    | 0.200233 | 0.884714 | 0.377286 | 0.494077 | 0.37522  | 0.491479 |
| MAG     | 0.318121 | 3.460821 | 0.000648 | 0.002594 | 0.000827 | 0.003158 |
| MAGEA10 | 1.423942 | 4.068594 | 6.61E-05 | 0.000373 | 5.84E-05 | 0.000333 |
| MAGED2  | -0.20633 | -1.32384 | 0.186941 | 0.288452 | 0.187473 | 0.289272 |

|          |          |          |          |          |          |          |
|----------|----------|----------|----------|----------|----------|----------|
| MAGEF1   | 1.080631 | 5.371774 | 1.99E-07 | 2.27E-06 | 1.82E-07 | 2.09E-06 |
| MAGI1    | 1.421604 | 10.44643 | 5.68E-21 | 1.78E-18 | 6.83E-21 | 2.01E-18 |
| MAGOH    | 0.42709  | 2.49925  | 0.013183 | 0.032783 | 0.013124 | 0.032636 |
| MAL      | -0.60864 | -1.48023 | 0.140254 | 0.228649 | 0.137153 | 0.224841 |
| MALT1    | 0.149725 | 0.65701  | 0.511867 | 0.623743 | 0.510012 | 0.622288 |
| MAMDC2   | 1.251585 | 3.245929 | 0.001355 | 0.004792 | 0.001243 | 0.004447 |
| MAN1A1   | 1.211075 | 4.197816 | 3.93E-05 | 0.00024  | 3.50E-05 | 0.000217 |
| MAN1A2   | 1.51474  | 10.84096 | 3.50E-22 | 1.43E-19 | 3.98E-22 | 1.70E-19 |
| MAN1B1   | 0.232747 | 1.490381 | 0.137569 | 0.225445 | 0.138024 | 0.225953 |
| MAN2A2   | 0.244025 | 1.55386  | 0.121668 | 0.204375 | 0.122054 | 0.204982 |
| MAN2C1   | 0.347926 | 2.394507 | 0.017489 | 0.04141  | 0.017792 | 0.041875 |
| MANBA    | 0.326275 | 1.905225 | 0.058067 | 0.113148 | 0.057908 | 0.112698 |
| MAOA     | 0.9326   | 2.497934 | 0.013231 | 0.032885 | 0.012551 | 0.031344 |
| MAOB     | -0.03864 | -0.21617 | 0.829059 | 0.877805 | 0.828843 | 0.877489 |
| MAP1A    | 0.647461 | 4.317978 | 2.39E-05 | 0.000154 | 2.47E-05 | 0.000158 |
| MAP2K1   | -0.38591 | -2.81628 | 0.005304 | 0.015145 | 0.005493 | 0.015563 |
| MAP2K3   | 0.152348 | 0.722799 | 0.470578 | 0.585265 | 0.469    | 0.583611 |
| MAP2K4   | 0.095173 | 0.562083 | 0.574637 | 0.679787 | 0.574496 | 0.679449 |
| MAP2K5   | -0.25968 | -1.96779 | 0.05036  | 0.099997 | 0.05158  | 0.102332 |
| MAP3K11  | 0.631466 | 6.658482 | 2.22E-10 | 5.69E-09 | 4.32E-10 | 1.01E-08 |
| MAP3K14  | 0.992537 | 5.236148 | 3.85E-07 | 4.05E-06 | 3.60E-07 | 3.81E-06 |
| MAP3K4   | 0.525038 | 3.620333 | 0.000366 | 0.001583 | 0.000379 | 0.001627 |
| MAP3K6   | -0.22166 | -1.49893 | 0.135338 | 0.222642 | 0.136259 | 0.223687 |
| MAP3K7   | 0.256698 | 1.928429 | 0.055101 | 0.108176 | 0.056329 | 0.110311 |
| MAP4     | -0.23264 | -1.76843 | 0.078387 | 0.144478 | 0.08     | 0.146361 |
| MAP4K1   | -0.60404 | -4.91974 | 1.71E-06 | 1.51E-05 | 2.00E-06 | 1.74E-05 |
| MAP4K2   | -0.43196 | -2.31354 | 0.021625 | 0.049458 | 0.021358 | 0.048859 |
| MAP4K3   | 1.244394 | 5.936897 | 1.13E-08 | 1.72E-07 | 9.94E-09 | 1.56E-07 |
| MAP4K4   | 0.885865 | 3.877868 | 0.00014  | 0.000709 | 0.00013  | 0.000666 |
| MAP4K5   | 0.708509 | 3.940396 | 0.00011  | 0.000573 | 0.000107 | 0.000561 |
| MAPK1    | -0.02698 | -0.16102 | 0.872225 | 0.906158 | 0.872204 | 0.906136 |
| MAPK10   | 0.163131 | 1.215205 | 0.225602 | 0.332455 | 0.227856 | 0.335103 |
| MAPK11   | 0.598213 | 5.255508 | 3.51E-07 | 3.73E-06 | 4.49E-07 | 4.69E-06 |
| MAPK14   | 0.268021 | 1.575329 | 0.116631 | 0.197893 | 0.116449 | 0.197644 |
| MAPK4    | 0.214038 | 1.919454 | 0.056232 | 0.110076 | 0.058985 | 0.114368 |
| MAPK6    | 0.13872  | 0.83967  | 0.402013 | 0.518513 | 0.402048 | 0.518131 |
| MAPK7    | 0.257044 | 1.923612 | 0.055706 | 0.109181 | 0.056915 | 0.111181 |
| MAPK8IP3 | 0.140115 | 1.463762 | 0.144699 | 0.234351 | 0.152086 | 0.244629 |
| MAPK9    | 0.150882 | 0.969567 | 0.333337 | 0.448392 | 0.333945 | 0.448953 |
| MAPKAP1  | 0.534167 | 3.316563 | 0.001068 | 0.003893 | 0.001072 | 0.003905 |
| MAPKAPK2 | -0.21499 | -1.55625 | 0.121099 | 0.203565 | 0.122606 | 0.20573  |

|          |          |          |          |          |          |          |
|----------|----------|----------|----------|----------|----------|----------|
| MAPKAPK3 | 1.048648 | 7.259878 | 6.75E-12 | 2.69E-10 | 7.34E-12 | 2.95E-10 |
| MAPKAPK5 | -0.44281 | -2.53404 | 0.011978 | 0.029999 | 0.01189  | 0.029869 |
| MAPRE1   | 0.25821  | 2.008367 | 0.045838 | 0.092305 | 0.047158 | 0.094542 |
| MAPRE2   | 0.702228 | 3.956047 | 0.000103 | 0.000545 | 0.000101 | 0.000534 |
| MAPRE3   | -0.1641  | -1.34404 | 0.180332 | 0.279815 | 0.183724 | 0.284384 |
| MAPT     | 1.396887 | 9.063894 | 7.41E-17 | 1.12E-14 | 7.37E-17 | 1.12E-14 |
| MARCKS   | 0.336574 | 1.647286 | 0.10094  | 0.176477 | 0.099848 | 0.175172 |
| MARCKSL1 | 0.260332 | 1.255944 | 0.21048  | 0.315956 | 0.208945 | 0.313851 |
| MARK3    | -0.12994 | -0.90682 | 0.365506 | 0.481738 | 0.367015 | 0.482737 |
| MARS     | -0.04099 | -0.20874 | 0.834845 | 0.880324 | 0.834412 | 0.880102 |
| MARVELD3 | 0.284505 | 1.080216 | 0.28124  | 0.392423 | 0.278523 | 0.389484 |
| MAT2B    | -0.0434  | -0.37917 | 0.704934 | 0.786396 | 0.707776 | 0.788655 |
| MATN2    | -0.91948 | -2.13022 | 0.034274 | 0.072139 | 0.032855 | 0.06962  |
| MAX      | -0.25418 | -1.51086 | 0.132272 | 0.21921  | 0.132159 | 0.218791 |
| MBD1     | 0.134357 | 0.835334 | 0.404444 | 0.520661 | 0.404721 | 0.52072  |
| MBD2     | 0.244365 | 2.527478 | 0.012197 | 0.03051  | 0.013775 | 0.033913 |
| MBD3     | 0.268171 | 2.957352 | 0.003445 | 0.010527 | 0.004174 | 0.012417 |
| MBD4     | 0.458166 | 2.567444 | 0.010914 | 0.027798 | 0.010805 | 0.027614 |
| MBIP     | 2.149688 | 8.344452 | 8.19E-15 | 8.02E-13 | 5.67E-15 | 5.79E-13 |
| MBNL1    | -0.63456 | -3.41786 | 0.000753 | 0.00294  | 0.000734 | 0.002881 |
| MBNL2    | 0.136624 | 0.539427 | 0.590143 | 0.692379 | 0.588155 | 0.691082 |
| MBNL3    | 1.379097 | 5.328576 | 2.46E-07 | 2.72E-06 | 2.10E-07 | 2.39E-06 |
| MBP      | 0.141302 | 1.186566 | 0.23669  | 0.344623 | 0.240748 | 0.349449 |
| MBTPS1   | 0.081853 | 0.659183 | 0.510474 | 0.622853 | 0.513535 | 0.625613 |
| MCART1   | 0.582253 | 3.367724 | 0.000896 | 0.003363 | 0.000886 | 0.003328 |
| MCFD2    | 0.213064 | 1.460299 | 0.145647 | 0.235562 | 0.146726 | 0.237388 |
| MCL1     | 0.45661  | 2.114724 | 0.035589 | 0.074342 | 0.03488  | 0.073185 |
| MCM3     | -0.49618 | -2.63056 | 0.009133 | 0.023966 | 0.00898  | 0.023591 |
| MCM6     | -0.42686 | -2.98766 | 0.003133 | 0.009739 | 0.003224 | 0.009983 |
| MCM7     | -0.27712 | -1.23606 | 0.217768 | 0.323895 | 0.215819 | 0.321404 |
| MCRS1    | -0.0835  | -0.61418 | 0.539737 | 0.648855 | 0.541572 | 0.650321 |
| MCTS1    | -1.09618 | -7.0737  | 2.03E-11 | 7.06E-10 | 2.06E-11 | 7.12E-10 |
| MDH1     | 0.550619 | 3.866206 | 0.000146 | 0.000737 | 0.000153 | 0.000763 |
| MDH2     | 0.07371  | 0.452156 | 0.651606 | 0.743879 | 0.651716 | 0.743643 |
| MDK      | -0.06365 | -0.16625 | 0.868117 | 0.904671 | 0.867118 | 0.904244 |
| MDM2     | -0.05677 | -0.24004 | 0.810524 | 0.86402  | 0.80964  | 0.863273 |
| MDM4     | 0.56828  | 2.003222 | 0.046392 | 0.09322  | 0.045052 | 0.091033 |
| ME2      | -0.16553 | -0.76137 | 0.447259 | 0.562214 | 0.445484 | 0.560283 |
| ME3      | 0.664462 | 5.040271 | 9.76E-07 | 9.48E-06 | 1.09E-06 | 1.04E-05 |
| MED12    | 0.319203 | 2.253552 | 0.025219 | 0.056176 | 0.025707 | 0.057072 |
| MED19    | 0.561906 | 3.561756 | 0.000452 | 0.001903 | 0.000457 | 0.001923 |

|        |          |          |          |          |          |          |
|--------|----------|----------|----------|----------|----------|----------|
| MED28  | 0.358227 | 2.19208  | 0.029432 | 0.063718 | 0.029463 | 0.063815 |
| MED4   | 0.837232 | 5.478326 | 1.18E-07 | 1.40E-06 | 1.21E-07 | 1.44E-06 |
| MED6   | 0.549721 | 3.895064 | 0.000131 | 0.000671 | 0.000137 | 0.000695 |
| MEF2A  | 1.839698 | 10.95138 | 1.60E-22 | 7.50E-20 | 1.32E-22 | 6.21E-20 |
| MEF2C  | 0.068697 | 0.373593 | 0.70907  | 0.78991  | 0.70859  | 0.789375 |
| MEF2D  | 0.287578 | 2.44029  | 0.015474 | 0.037411 | 0.016404 | 0.039175 |
| MEG3   | 0.406933 | 2.421106 | 0.016292 | 0.038987 | 0.016255 | 0.038898 |
| MEIS2  | 0.36475  | 0.941871 | 0.347301 | 0.462806 | 0.343608 | 0.459186 |
| MEN1   | 0.535335 | 3.687901 | 0.000286 | 0.001285 | 0.000296 | 0.001322 |
| MEOX1  | 0.927845 | 2.968548 | 0.003327 | 0.010219 | 0.003119 | 0.009694 |
| MERTK  | 0.225941 | 0.915605 | 0.360886 | 0.476585 | 0.358422 | 0.473597 |
| MESP1  | 0.509619 | 4.979492 | 1.30E-06 | 1.20E-05 | 1.80E-06 | 1.59E-05 |
| MEST   | 0.990739 | 2.128924 | 0.034382 | 0.072271 | 0.032927 | 0.06971  |
| MET    | 0.796058 | 2.996339 | 0.003049 | 0.009521 | 0.002883 | 0.0091   |
| METAP2 | 0.576707 | 3.04553  | 0.002609 | 0.00837  | 0.00255  | 0.008175 |
| MFAP1  | -0.0944  | -0.73155 | 0.465229 | 0.580301 | 0.467919 | 0.583193 |
| MFAP3  | 1.333981 | 6.630213 | 2.60E-10 | 6.57E-09 | 2.25E-10 | 5.84E-09 |
| MFAP4  | 0.311321 | 1.367196 | 0.172972 | 0.270989 | 0.171085 | 0.268391 |
| MFGE8  | 0.829896 | 7.186116 | 1.05E-11 | 4.10E-10 | 1.52E-11 | 5.66E-10 |
| MFHAS1 | 0.953291 | 3.705283 | 0.000268 | 0.001215 | 0.000247 | 0.001136 |
| MFI2   | 0.073967 | 0.335309 | 0.737714 | 0.812169 | 0.736689 | 0.811556 |
| MFN2   | -0.01517 | -0.07879 | 0.937274 | 0.957377 | 0.937124 | 0.957321 |
| MFNG   | 0.97633  | 4.667155 | 5.33E-06 | 4.15E-05 | 4.92E-06 | 3.85E-05 |
| MGA    | 0.595501 | 3.051796 | 0.002557 | 0.008238 | 0.002489 | 0.008023 |
| MGAT1  | 0.203124 | 1.565016 | 0.11903  | 0.200948 | 0.121178 | 0.203825 |
| MGAT2  | 0.020526 | 0.129764 | 0.896873 | 0.927867 | 0.896969 | 0.927967 |
| MGAT3  | -0.11902 | -1.06837 | 0.286537 | 0.398321 | 0.291925 | 0.404495 |
| MGLL   | 0.886208 | 3.548082 | 0.000475 | 0.001988 | 0.000443 | 0.00187  |
| MGMT   | 0.64502  | 2.509904 | 0.012803 | 0.031923 | 0.012316 | 0.030857 |
| MGP    | -0.57773 | -1.74502 | 0.082391 | 0.149725 | 0.080251 | 0.146697 |
| MGST1  | -0.12788 | -0.28156 | 0.778551 | 0.840228 | 0.776792 | 0.839679 |
| MGST2  | -0.30793 | -1.5085  | 0.132876 | 0.219823 | 0.13164  | 0.218086 |
| MGST3  | 0.027637 | 0.25732  | 0.797175 | 0.85444  | 0.79969  | 0.856352 |
| MIB1   | 0.770608 | 2.903245 | 0.004073 | 0.012161 | 0.003864 | 0.011611 |
| MICA   | -0.74077 | -2.44845 | 0.015137 | 0.036748 | 0.01448  | 0.035353 |
| MID1   | 0.548512 | 1.76322  | 0.079264 | 0.145597 | 0.077262 | 0.142896 |
| MINPP1 | 1.006794 | 3.914625 | 0.000121 | 0.000627 | 0.000111 | 0.000581 |
| MIPEP  | -0.4501  | -2.04884 | 0.041675 | 0.085089 | 0.040852 | 0.083698 |
| MITF   | 0.96238  | 4.182632 | 4.18E-05 | 0.000252 | 3.84E-05 | 0.000235 |
| MKI67  | 0.591301 | 2.963449 | 0.00338  | 0.010356 | 0.003285 | 0.010119 |
| MKKS   | 0.410885 | 2.398    | 0.017328 | 0.041089 | 0.017251 | 0.040764 |

|          |          |          |          |          |          |          |
|----------|----------|----------|----------|----------|----------|----------|
| MKL2     | 0.233375 | 1.619909 | 0.106698 | 0.184096 | 0.107739 | 0.185689 |
| MKNK1    | 0.680688 | 2.882211 | 0.004344 | 0.012873 | 0.004159 | 0.012389 |
| MKNK2    | 0.253576 | 1.549159 | 0.122794 | 0.205898 | 0.122873 | 0.206105 |
| MKRN1    | -0.04342 | -0.2751  | 0.783503 | 0.844182 | 0.78371  | 0.844438 |
| MLF1IP   | -0.58368 | -2.17439 | 0.030753 | 0.065908 | 0.029791 | 0.064257 |
| MLF2     | 0.180087 | 1.145776 | 0.253144 | 0.361744 | 0.253638 | 0.362451 |
| MLH1     | 0.3374   | 1.428355 | 0.154621 | 0.247814 | 0.152665 | 0.245308 |
| MLH3     | 0.325668 | 2.128566 | 0.034412 | 0.072301 | 0.034689 | 0.072818 |
| MLL      | 0.567974 | 3.178733 | 0.001694 | 0.005794 | 0.001668 | 0.005705 |
| MLL5     | 1.277668 | 7.002951 | 3.07E-11 | 1.00E-09 | 2.76E-11 | 9.13E-10 |
| MLLT10   | -0.28169 | -1.72433 | 0.086066 | 0.155103 | 0.086141 | 0.155596 |
| MLN      | -0.12871 | -0.45926 | 0.646502 | 0.74056  | 0.644495 | 0.738811 |
| MLPH     | 0.610529 | 1.672032 | 0.095953 | 0.170116 | 0.093494 | 0.166673 |
| MLYCD    | -0.01109 | -0.06467 | 0.948499 | 0.966056 | 0.948468 | 0.966147 |
| MMD      | 1.170265 | 6.004849 | 7.92E-09 | 1.25E-07 | 7.14E-09 | 1.15E-07 |
| MME      | 0.017122 | 0.040542 | 0.967698 | 0.978525 | 0.967441 | 0.978265 |
| MMP1     | 0.694641 | 1.041261 | 0.298908 | 0.411622 | 0.294654 | 0.407621 |
| MMP10    | -1.16957 | -2.15228 | 0.032474 | 0.068999 | 0.03102  | 0.066394 |
| MMP11    | -0.31035 | -1.66006 | 0.09834  | 0.173536 | 0.097662 | 0.172367 |
| MMP15    | 0.391839 | 3.365008 | 0.000904 | 0.003387 | 0.001006 | 0.003706 |
| MMP2     | 0.351226 | 1.943944 | 0.053189 | 0.105081 | 0.052828 | 0.104368 |
| MMP25    | -0.33602 | -3.6037  | 0.000389 | 0.001664 | 0.0005   | 0.002073 |
| MMP7     | 2.587313 | 4.051129 | 7.09E-05 | 0.000394 | 6.11E-05 | 0.000346 |
| MMP9     | -0.40247 | -0.87245 | 0.383925 | 0.501236 | 0.380037 | 0.496297 |
| MMRN2    | 2.438732 | 11.91245 | 1.58E-25 | 1.48E-22 | 9.59E-26 | 1.50E-22 |
| MN1      | 0.318793 | 1.046752 | 0.296373 | 0.409559 | 0.293191 | 0.40613  |
| MNAT1    | 0.383501 | 2.19078  | 0.029528 | 0.063749 | 0.029361 | 0.06368  |
| MNDA     | 0.531884 | 2.033589 | 0.043205 | 0.087639 | 0.04204  | 0.085647 |
| MNT      | 0.123501 | 1.088129 | 0.277739 | 0.389084 | 0.282758 | 0.394234 |
| MOAP1    | 0.431366 | 2.545637 | 0.011599 | 0.029214 | 0.011557 | 0.029186 |
| MOBKL2A  | 0.481985 | 4.971619 | 1.34E-06 | 1.24E-05 | 1.98E-06 | 1.73E-05 |
| MOCS1    | 0.850088 | 4.700734 | 4.59E-06 | 3.63E-05 | 4.41E-06 | 3.50E-05 |
| MOCS2    | 0.842468 | 5.833383 | 1.95E-08 | 2.80E-07 | 2.08E-08 | 3.00E-07 |
| MOCS3    | 0.186614 | 1.127415 | 0.260806 | 0.370553 | 0.260819 | 0.370347 |
| MOSPD3   | -0.25505 | -1.73441 | 0.084258 | 0.152313 | 0.085025 | 0.153995 |
| MPDU1    | 0.501909 | 3.546753 | 0.000477 | 0.001994 | 0.000497 | 0.002065 |
| MPDZ     | 0.604757 | 4.400913 | 1.69E-05 | 0.000114 | 1.81E-05 | 0.000122 |
| MPHOSPH6 | -0.22335 | -1.38738 | 0.166744 | 0.263074 | 0.166975 | 0.263438 |
| MPI      | 0.011374 | 0.096157 | 0.923484 | 0.946854 | 0.924163 | 0.947342 |
| MPP1     | -0.03293 | -0.16514 | 0.86899  | 0.904797 | 0.868618 | 0.904472 |
| MPP2     | 1.278192 | 12.12448 | 3.37E-26 | 7.73E-23 | 8.89E-26 | 1.50E-22 |

|         |          |          |          |          |          |          |
|---------|----------|----------|----------|----------|----------|----------|
| MPP3    | 0.349608 | 2.188177 | 0.029719 | 0.064103 | 0.029822 | 0.064266 |
| MPP6    | 1.111058 | 3.044762 | 0.002615 | 0.008385 | 0.002427 | 0.007879 |
| MPST    | -1.07145 | -5.06212 | 8.81E-07 | 8.66E-06 | 7.98E-07 | 7.95E-06 |
| MPV17   | 0.045774 | 0.28465  | 0.776183 | 0.839406 | 0.776315 | 0.839356 |
| MPZL1   | 0.08785  | 0.537601 | 0.591401 | 0.693509 | 0.591508 | 0.693635 |
| MR1     | 1.021747 | 5.902542 | 1.36E-08 | 2.02E-07 | 1.30E-08 | 1.94E-07 |
| MRAS    | 1.037757 | 7.086766 | 1.88E-11 | 6.69E-10 | 2.01E-11 | 7.00E-10 |
| MRE11A  | -0.14981 | -0.70739 | 0.48008  | 0.593003 | 0.478494 | 0.591405 |
| MRP63   | 0.05087  | 0.274902 | 0.783652 | 0.844182 | 0.783267 | 0.844348 |
| MRPL1   | 0.295502 | 1.611644 | 0.108486 | 0.186635 | 0.107877 | 0.185791 |
| MRPL14  | -0.05067 | -0.25261 | 0.800808 | 0.856577 | 0.800233 | 0.856352 |
| MRPL16  | 0.017613 | 0.10023  | 0.920254 | 0.945398 | 0.920174 | 0.945316 |
| MRPL19  | 0.859101 | 3.225328 | 0.001452 | 0.00508  | 0.001361 | 0.004822 |
| MRPL21  | 0.470721 | 2.403474 | 0.017077 | 0.040598 | 0.016778 | 0.039949 |
| MRPL22  | -0.06039 | -0.43495 | 0.664031 | 0.753488 | 0.665282 | 0.754907 |
| MRPL23  | -0.25595 | -1.7788  | 0.076666 | 0.142287 | 0.077547 | 0.143154 |
| MRPL28  | 0.649983 | 4.126109 | 5.25E-05 | 0.000306 | 5.31E-05 | 0.000307 |
| MRPL33  | 0.94566  | 7.127134 | 1.48E-11 | 5.48E-10 | 1.77E-11 | 6.40E-10 |
| MRPL39  | -0.53376 | -3.67984 | 0.000294 | 0.001317 | 0.000305 | 0.001353 |
| MRPL4   | -0.28029 | -1.78376 | 0.075854 | 0.141082 | 0.076148 | 0.141349 |
| MRPL40  | 0.192661 | 1.101056 | 0.272086 | 0.382876 | 0.271629 | 0.382117 |
| MRPL42  | -0.02201 | -0.13676 | 0.89135  | 0.922764 | 0.891414 | 0.92283  |
| MRPL43  | -0.27982 | -1.42254 | 0.156299 | 0.24978  | 0.155175 | 0.248323 |
| MRPL54  | -0.12246 | -0.86591 | 0.387493 | 0.503827 | 0.389144 | 0.505382 |
| MRPS10  | 0.336688 | 1.631942 | 0.104135 | 0.180826 | 0.102986 | 0.178875 |
| MRPS11  | -0.20593 | -1.55396 | 0.121644 | 0.204375 | 0.123585 | 0.20715  |
| MRPS12  | 0.468637 | 3.312017 | 0.001084 | 0.00395  | 0.001125 | 0.004072 |
| MRPS16  | 0.585469 | 3.371801 | 0.000883 | 0.003335 | 0.000873 | 0.00329  |
| MRPS18B | -0.17855 | -1.063   | 0.288957 | 0.401448 | 0.288841 | 0.40105  |
| MRPS23  | 0.337772 | 2.008935 | 0.045777 | 0.092261 | 0.045708 | 0.092122 |
| MRPS30  | 0.242509 | 1.000949 | 0.317961 | 0.432026 | 0.315555 | 0.429035 |
| MRPS31  | 0.479985 | 2.792582 | 0.005694 | 0.016024 | 0.005656 | 0.015948 |
| MRPS35  | -0.19684 | -0.69296 | 0.489073 | 0.600953 | 0.486389 | 0.598436 |
| MRPS36  | -0.28635 | -1.85167 | 0.065426 | 0.124951 | 0.065785 | 0.125229 |
| MRPS5   | 0.268681 | 2.392304 | 0.017592 | 0.041569 | 0.018826 | 0.04402  |
| MRPS6   | 0.525483 | 2.735142 | 0.006749 | 0.018531 | 0.006613 | 0.018261 |
| MRRF    | -0.21564 | -1.08697 | 0.278252 | 0.389454 | 0.276899 | 0.387907 |
| MRV11   | -0.19617 | -0.37721 | 0.706385 | 0.787478 | 0.704017 | 0.78577  |
| MS4A1   | -1.14322 | -2.9689  | 0.003323 | 0.010219 | 0.003089 | 0.00962  |
| MS4A2   | 1.16161  | 3.763192 | 0.000216 | 0.001011 | 0.000195 | 0.000928 |
| MS4A4A  | 0.979612 | 4.000663 | 8.65E-05 | 0.00047  | 7.95E-05 | 0.000435 |

|        |          |          |          |          |          |          |
|--------|----------|----------|----------|----------|----------|----------|
| MS4A6A | 0.087779 | 0.452252 | 0.651537 | 0.743879 | 0.65072  | 0.743525 |
| MS4A8B | -0.65533 | -1.67131 | 0.096095 | 0.170239 | 0.09355  | 0.166673 |
| MSC    | 0.198139 | 1.136344 | 0.25706  | 0.366005 | 0.256633 | 0.365508 |
| MSH2   | 0.336261 | 1.410874 | 0.159707 | 0.253993 | 0.157694 | 0.251519 |
| MSH3   | 0.419595 | 2.572728 | 0.010754 | 0.027499 | 0.010769 | 0.027538 |
| MSI2   | 0.013239 | 0.06161  | 0.95093  | 0.967187 | 0.950745 | 0.967208 |
| MSLN   | -1.12047 | -1.83241 | 0.068255 | 0.129354 | 0.065878 | 0.125356 |
| MSMB   | -2.19474 | -3.57438 | 0.000432 | 0.00183  | 0.000385 | 0.001649 |
| MSRA   | 1.115689 | 4.028622 | 7.75E-05 | 0.000427 | 7.00E-05 | 0.000388 |
| MSRB2  | 1.429531 | 5.620815 | 5.78E-08 | 7.56E-07 | 4.86E-08 | 6.42E-07 |
| MST1R  | 0.423742 | 1.772758 | 0.077665 | 0.143542 | 0.076226 | 0.141438 |
| MSX1   | 1.679467 | 8.074003 | 4.57E-14 | 3.41E-12 | 3.60E-14 | 2.97E-12 |
| MT1E   | -0.57831 | -1.24752 | 0.213545 | 0.318825 | 0.209807 | 0.314744 |
| MT3    | -0.57609 | -3.99788 | 8.75E-05 | 0.000474 | 9.13E-05 | 0.00049  |
| MTA1   | -0.45844 | -2.67023 | 0.008151 | 0.021693 | 0.008104 | 0.021614 |
| MTAP   | 0.027826 | 0.124088 | 0.90136  | 0.931075 | 0.900944 | 0.930646 |
| MTCH2  | 0.228363 | 1.289147 | 0.198713 | 0.302347 | 0.198189 | 0.30204  |
| MTCP1  | -0.39432 | -2.5443  | 0.011642 | 0.029307 | 0.011743 | 0.029558 |
| MTERF  | -0.61368 | -2.09263 | 0.037539 | 0.07793  | 0.036332 | 0.075759 |
| MTF1   | 0.603322 | 4.152287 | 4.72E-05 | 0.000281 | 4.92E-05 | 0.000289 |
| MTHFD1 | 0.163353 | 0.965519 | 0.335355 | 0.450462 | 0.335178 | 0.450301 |
| MTHFD2 | -0.03008 | -0.16562 | 0.868606 | 0.904754 | 0.868406 | 0.904472 |
| MTHFR  | 0.162938 | 1.330643 | 0.184697 | 0.285833 | 0.188073 | 0.289912 |
| MTIF2  | 0.579999 | 3.637298 | 0.000344 | 0.001504 | 0.000346 | 0.001508 |
| MTL5   | 0.439182 | 3.01748  | 0.002852 | 0.008996 | 0.002924 | 0.009201 |
| MTM1   | 0.700873 | 3.728187 | 0.000246 | 0.001133 | 0.000238 | 0.001103 |
| MTMR2  | 0.286704 | 1.634406 | 0.103617 | 0.18017  | 0.103263 | 0.179224 |
| MTMR4  | 0.450189 | 2.759605 | 0.006279 | 0.017461 | 0.006288 | 0.017498 |
| MTO1   | 0.197871 | 1.307106 | 0.192554 | 0.295656 | 0.193371 | 0.296514 |
| MTR    | 0.297665 | 2.052238 | 0.041341 | 0.084443 | 0.041904 | 0.085481 |
| MTRF1  | 0.664234 | 2.713148 | 0.007197 | 0.019519 | 0.006905 | 0.018946 |
| MTX2   | 0.441499 | 3.127536 | 0.002003 | 0.006687 | 0.002072 | 0.006886 |
| MTX3   | 0.63541  | 4.090251 | 6.06E-05 | 0.000345 | 6.16E-05 | 0.000348 |
| MUC13  | 1.010729 | 2.579458 | 0.010553 | 0.027103 | 0.009967 | 0.025781 |
| MUC2   | -2.34818 | -3.70538 | 0.000268 | 0.001215 | 0.000236 | 0.001098 |
| MUC4   | 0.451501 | 0.748291 | 0.455091 | 0.569773 | 0.451172 | 0.565775 |
| MUM1   | 0.228335 | 1.680703 | 0.094253 | 0.167862 | 0.095733 | 0.169598 |
| MUS81  | -0.00527 | -0.05692 | 0.954662 | 0.969933 | 0.955568 | 0.970225 |
| MUSK   | -0.12387 | -1.25332 | 0.211432 | 0.316825 | 0.219034 | 0.325264 |
| MUT    | 0.610811 | 3.037072 | 0.00268  | 0.008546 | 0.002599 | 0.008315 |
| MUTYH  | 0.072682 | 0.419802 | 0.675044 | 0.761944 | 0.674812 | 0.76131  |

|         |          |          |          |          |          |          |
|---------|----------|----------|----------|----------|----------|----------|
| MVD     | -0.35429 | -2.43574 | 0.015665 | 0.037736 | 0.015941 | 0.038305 |
| MVK     | 0.641715 | 5.374003 | 1.97E-07 | 2.26E-06 | 2.43E-07 | 2.71E-06 |
| MVP     | 0.207569 | 1.393529 | 0.164879 | 0.260394 | 0.165807 | 0.261971 |
| MX1     | -0.27984 | -1.20039 | 0.231289 | 0.338016 | 0.229134 | 0.336121 |
| MX2     | 0.787731 | 3.044004 | 0.002622 | 0.008386 | 0.00248  | 0.008009 |
| MXD4    | 0.319141 | 1.853908 | 0.065103 | 0.124435 | 0.06491  | 0.123964 |
| MYB     | -0.70301 | -2.83714 | 0.004981 | 0.014419 | 0.004758 | 0.013855 |
| MYBPH   | 1.158781 | 12.07228 | 4.94E-26 | 7.73E-23 | 1.93E-25 | 2.27E-22 |
| MYCBP2  | 0.472019 | 3.457928 | 0.000654 | 0.002616 | 0.000689 | 0.002742 |
| MYCL1   | 0.71046  | 3.961133 | 0.000101 | 0.000535 | 9.85E-05 | 0.000524 |
| MYD88   | 0.539649 | 3.563733 | 0.000449 | 0.001893 | 0.000458 | 0.001929 |
| MYEOV   | 0.179108 | 0.732779 | 0.46448  | 0.579522 | 0.462225 | 0.577167 |
| MYH10   | 0.338249 | 1.194443 | 0.233603 | 0.340867 | 0.230728 | 0.337616 |
| MYH11   | 0.422759 | 1.309193 | 0.191847 | 0.294821 | 0.188788 | 0.290744 |
| MYH9    | -0.00369 | -0.02588 | 0.979374 | 0.986722 | 0.979441 | 0.98679  |
| MYL6    | 0.050501 | 0.500824 | 0.617    | 0.713734 | 0.622478 | 0.719008 |
| MYL9    | -0.52332 | -2.20147 | 0.028752 | 0.062533 | 0.027986 | 0.061065 |
| MYLIP   | 0.182464 | 0.860824 | 0.390281 | 0.506299 | 0.388564 | 0.504768 |
| MYLK    | 0.148509 | 0.400429 | 0.689233 | 0.774234 | 0.687018 | 0.772236 |
| MYO10   | 0.778744 | 2.456466 | 0.014813 | 0.036091 | 0.014142 | 0.034647 |
| MYO1C   | 0.890145 | 6.114342 | 4.43E-09 | 7.51E-08 | 4.73E-09 | 7.97E-08 |
| MYO1D   | -0.45063 | -2.34279 | 0.020041 | 0.046423 | 0.019736 | 0.045876 |
| MYO1E   | 0.14485  | 0.71263  | 0.476837 | 0.589772 | 0.475462 | 0.588847 |
| MYO1F   | 0.958648 | 7.01712  | 2.82E-11 | 9.28E-10 | 3.25E-11 | 1.06E-09 |
| MYO5A   | 1.196234 | 8.300948 | 1.08E-14 | 9.97E-13 | 1.18E-14 | 1.16E-12 |
| MYO6    | 1.086654 | 4.092514 | 6.01E-05 | 0.000343 | 5.44E-05 | 0.000313 |
| MYO7A   | 0.507354 | 3.971573 | 9.70E-05 | 0.00052  | 0.000106 | 0.000561 |
| MYO7B   | -0.20814 | -1.79855 | 0.073474 | 0.137307 | 0.076267 | 0.141459 |
| MYO9A   | 1.547325 | 7.598548 | 8.75E-13 | 4.20E-11 | 7.17E-13 | 3.58E-11 |
| MYO9B   | -0.54245 | -4.36252 | 1.98E-05 | 0.000132 | 2.25E-05 | 0.000146 |
| MYOC    | -0.52991 | -1.14615 | 0.252989 | 0.361729 | 0.249114 | 0.358072 |
| MYOM2   | -0.59935 | -2.63327 | 0.009062 | 0.023835 | 0.008759 | 0.023114 |
| MYST1   | 0.617285 | 5.142751 | 6.02E-07 | 6.08E-06 | 7.29E-07 | 7.30E-06 |
| MYST3   | 0.275703 | 1.590348 | 0.113205 | 0.193079 | 0.112909 | 0.192621 |
| N4BP1   | 0.838823 | 7.033396 | 2.57E-11 | 8.50E-10 | 3.51E-11 | 1.13E-09 |
| NAALAD2 | -0.13174 | -1.77327 | 0.07758  | 0.143498 | 0.088511 | 0.15896  |
| NAB1    | -0.18275 | -0.93155 | 0.3526   | 0.467875 | 0.351317 | 0.466834 |
| NADSYN1 | 0.130784 | 0.899394 | 0.369435 | 0.485555 | 0.37077  | 0.486901 |
| NAGLU   | 0.382583 | 3.139776 | 0.001925 | 0.006471 | 0.002082 | 0.00691  |
| NAGPA   | 0.59094  | 3.202273 | 0.001567 | 0.005436 | 0.001534 | 0.00533  |
| NANS    | 0.21323  | 1.937737 | 0.053947 | 0.106221 | 0.056764 | 0.111024 |



|         |          |          |          |          |          |          |
|---------|----------|----------|----------|----------|----------|----------|
| NAPIL4  | 0.717162 | 4.854808 | 2.30E-06 | 1.94E-05 | 2.40E-06 | 2.03E-05 |
| NAPG    | -0.10198 | -0.51367 | 0.608    | 0.706976 | 0.60699  | 0.705802 |
| NAPSB   | -0.23818 | -0.9002  | 0.369005 | 0.485261 | 0.366283 | 0.482492 |
| NARF    | -0.32605 | -2.02953 | 0.043619 | 0.088397 | 0.043732 | 0.08871  |
| NARS    | 0.496959 | 2.973373 | 0.003277 | 0.010125 | 0.003267 | 0.010088 |
| NASP    | 0.253321 | 1.643195 | 0.101784 | 0.177484 | 0.102269 | 0.178156 |
| NAT2    | -0.25682 | -0.601   | 0.548466 | 0.656579 | 0.545273 | 0.653938 |
| NAT8    | -1.1056  | -3.28856 | 0.001174 | 0.004212 | 0.001082 | 0.003932 |
| NBEA    | -0.76051 | -2.78192 | 0.005877 | 0.016492 | 0.005588 | 0.015793 |
| NBL1    | -0.1656  | -0.7855  | 0.433014 | 0.549006 | 0.431376 | 0.547373 |
| NCAM1   | 0.213025 | 1.531081 | 0.127199 | 0.212149 | 0.128669 | 0.213841 |
| NCAM2   | -0.17652 | -1.94273 | 0.053337 | 0.105284 | 0.058495 | 0.11356  |
| NCBP1   | -0.13846 | -1.15485 | 0.249415 | 0.358548 | 0.253399 | 0.362219 |
| NCBP2   | 0.606739 | 3.290405 | 0.001167 | 0.004195 | 0.001141 | 0.00412  |
| NCF2    | -0.00998 | -0.04921 | 0.960799 | 0.974063 | 0.960678 | 0.973861 |
| NCF4    | 0.252463 | 1.30046  | 0.194817 | 0.298448 | 0.193686 | 0.296813 |
| NCK1    | 0.401084 | 2.291011 | 0.022918 | 0.051886 | 0.022777 | 0.051715 |
| NCKIPSD | 0.85249  | 9.877569 | 2.98E-19 | 6.66E-17 | 1.37E-18 | 2.79E-16 |
| NCL     | 0.151326 | 1.759287 | 0.079932 | 0.146463 | 0.087504 | 0.157575 |
| NCOA1   | 1.329654 | 8.735448 | 6.49E-16 | 7.82E-14 | 6.60E-16 | 7.75E-14 |
| NCOA2   | 0.415867 | 2.197416 | 0.029044 | 0.063022 | 0.028687 | 0.062392 |
| NCOA3   | 0.202528 | 1.189735 | 0.235445 | 0.343278 | 0.235217 | 0.343172 |
| NCOA4   | 0.591429 | 3.963944 | 9.99E-05 | 0.000531 | 0.000103 | 0.000545 |
| NCOA5   | 0.202966 | 1.468546 | 0.143397 | 0.232563 | 0.145016 | 0.234864 |
| NCOA6   | 0.250815 | 2.086423 | 0.038103 | 0.078788 | 0.039704 | 0.081809 |
| NDN     | 0.115807 | 0.501878 | 0.61626  | 0.713228 | 0.614665 | 0.711909 |
| NDP     | 0.454735 | 1.320415 | 0.188081 | 0.289925 | 0.184908 | 0.285878 |
| NDRG1   | 0.144812 | 0.557123 | 0.578015 | 0.682416 | 0.575903 | 0.680258 |
| NDST2   | 0.791041 | 6.862255 | 6.93E-11 | 2.02E-09 | 9.85E-11 | 2.86E-09 |
| NDUFA1  | -0.07979 | -0.59955 | 0.549431 | 0.65708  | 0.551477 | 0.658689 |
| NDUFA10 | 0.130275 | 0.861688 | 0.389806 | 0.505822 | 0.390701 | 0.506704 |
| NDUFA11 | -0.23422 | -1.59121 | 0.113011 | 0.193079 | 0.113897 | 0.194166 |
| NDUFA3  | 0.05465  | 0.33082  | 0.741098 | 0.814394 | 0.74112  | 0.814558 |
| NDUFA4  | 0.827508 | 6.163132 | 3.41E-09 | 6.04E-08 | 3.91E-09 | 6.85E-08 |
| NDUFA5  | -0.01826 | -0.16602 | 0.868292 | 0.904671 | 0.869815 | 0.905054 |
| NDUFA7  | 0.501731 | 3.615798 | 0.000372 | 0.001604 | 0.000391 | 0.001672 |
| NDUFA9  | -1.06008 | -6.58587 | 3.33E-10 | 8.04E-09 | 3.30E-10 | 8.08E-09 |
| NDUFAB1 | 0.25133  | 1.824879 | 0.069388 | 0.131184 | 0.070534 | 0.132976 |
| NDUFB11 | 0.321297 | 2.00257  | 0.046462 | 0.093322 | 0.046586 | 0.093557 |
| NDUFB2  | -0.54023 | -3.39769 | 0.000808 | 0.003099 | 0.000813 | 0.003126 |
| NDUFB5  | 0.79527  | 5.071647 | 8.42E-07 | 8.33E-06 | 8.54E-07 | 8.49E-06 |

|        |          |          |          |          |          |          |
|--------|----------|----------|----------|----------|----------|----------|
| NDUFB7 | -0.11513 | -1.21275 | 0.226536 | 0.333142 | 0.235256 | 0.343172 |
| NDUFB8 | -0.10032 | -0.72168 | 0.471267 | 0.585812 | 0.473009 | 0.587045 |
| NDUFC1 | 0.27595  | 1.76906  | 0.078282 | 0.144454 | 0.078627 | 0.144694 |
| NDUFC2 | 0.732456 | 5.453473 | 1.33E-07 | 1.57E-06 | 1.50E-07 | 1.75E-06 |
| NDUFS1 | 0.565509 | 2.06618  | 0.039993 | 0.082118 | 0.038821 | 0.080097 |
| NDUFS2 | -0.15284 | -0.92437 | 0.356316 | 0.471743 | 0.356343 | 0.471512 |
| NDUFS3 | 0.034364 | 0.199301 | 0.842213 | 0.885549 | 0.842107 | 0.885293 |
| NDUFS4 | -0.38685 | -2.76131 | 0.006248 | 0.017386 | 0.006433 | 0.017805 |
| NDUFS8 | -0.11035 | -0.46316 | 0.643714 | 0.738276 | 0.642115 | 0.736622 |
| NDUFV1 | 0.149946 | 1.218633 | 0.224301 | 0.331514 | 0.227789 | 0.335103 |
| NDUFV2 | -0.09668 | -0.50501 | 0.614059 | 0.711558 | 0.613237 | 0.71078  |
| NDUFV3 | 0.240298 | 0.996459 | 0.320132 | 0.434359 | 0.317746 | 0.431164 |
| NEBL   | 0.006139 | 0.026637 | 0.978774 | 0.986328 | 0.978678 | 0.986232 |
| NECAP1 | 0.08155  | 0.478455 | 0.632806 | 0.728611 | 0.632641 | 0.728243 |
| NEDD1  | 0.940381 | 6.716159 | 1.60E-10 | 4.24E-09 | 1.78E-10 | 4.73E-09 |
| NEDD4  | 0.090324 | 0.401582 | 0.688385 | 0.773651 | 0.687126 | 0.772236 |
| NEDD8  | 0.27888  | 2.546358 | 0.011575 | 0.029187 | 0.012572 | 0.031381 |
| NEDD9  | 0.463733 | 2.091838 | 0.037611 | 0.077941 | 0.036822 | 0.076713 |
| NEFH   | 0.038103 | 0.196975 | 0.84403  | 0.886864 | 0.843651 | 0.886567 |
| NEFL   | 0.086787 | 0.244614 | 0.806986 | 0.861587 | 0.805596 | 0.860327 |
| NEK2   | 0.563565 | 2.684943 | 0.007812 | 0.020969 | 0.007593 | 0.020497 |
| NEK3   | 0.51407  | 1.893882 | 0.059565 | 0.115445 | 0.058076 | 0.112978 |
| NEK4   | 0.864238 | 6.2888   | 1.73E-09 | 3.34E-08 | 1.94E-09 | 3.76E-08 |
| NEK7   | 0.640928 | 4.356511 | 2.03E-05 | 0.000134 | 2.12E-05 | 0.000139 |
| NELL1  | 0.411015 | 3.216525 | 0.001495 | 0.005208 | 0.001596 | 0.005487 |
| NEO1   | 0.146409 | 0.557115 | 0.578021 | 0.682416 | 0.575877 | 0.680258 |
| NET1   | -0.25839 | -1.08168 | 0.280589 | 0.391835 | 0.278258 | 0.389346 |
| NETO2  | 0.240873 | 0.512473 | 0.608839 | 0.707253 | 0.605889 | 0.705349 |
| NEU1   | 0.871612 | 1.957446 | 0.051571 | 0.102229 | 0.049704 | 0.098987 |
| NEXN   | 0.837509 | 3.184012 | 0.001665 | 0.005728 | 0.001565 | 0.005401 |
| NF1    | 0.866611 | 5.694679 | 3.97E-08 | 5.35E-07 | 4.10E-08 | 5.52E-07 |
| NF2    | 0.166337 | 1.572622 | 0.117257 | 0.19874  | 0.122179 | 0.205087 |
| NFASC  | 0.066604 | 0.492314 | 0.622993 | 0.719427 | 0.624615 | 0.720238 |
| NFAT5  | 0.915912 | 4.015856 | 8.15E-05 | 0.000446 | 7.56E-05 | 0.000417 |
| NFATC1 | 0.016417 | 0.103768 | 0.917449 | 0.943135 | 0.917526 | 0.943082 |
| NFATC2 | 1.135758 | 5.941602 | 1.11E-08 | 1.69E-07 | 1.01E-08 | 1.58E-07 |
| NFATC3 | 0.11107  | 0.812742 | 0.417252 | 0.533046 | 0.419292 | 0.534638 |
| NFATC4 | 0.816192 | 5.959831 | 1.00E-08 | 1.55E-07 | 1.13E-08 | 1.74E-07 |
| NFE2   | -0.04046 | -0.16543 | 0.868757 | 0.904754 | 0.868099 | 0.904472 |
| NFE2L2 | 0.536895 | 2.86569  | 0.004568 | 0.01343  | 0.004482 | 0.013175 |
| NFE2L3 | 1.288688 | 4.21298  | 3.69E-05 | 0.000227 | 3.27E-05 | 0.000203 |

|          |          |          |          |          |          |          |
|----------|----------|----------|----------|----------|----------|----------|
| NFIC     | 2.006697 | 9.612119 | 1.84E-18 | 3.32E-16 | 1.31E-18 | 2.79E-16 |
| NFIL3    | 0.936925 | 4.033986 | 7.59E-05 | 0.000419 | 7.01E-05 | 0.000389 |
| NFIX     | 0.615567 | 4.188564 | 4.08E-05 | 0.000247 | 4.23E-05 | 0.000256 |
| NFKB1    | 0.258103 | 1.832791 | 0.068198 | 0.129329 | 0.06917  | 0.130878 |
| NFKB2    | -0.44701 | -2.42143 | 0.016278 | 0.038973 | 0.016077 | 0.038572 |
| NFKBIB   | -0.09988 | -0.7427  | 0.45846  | 0.57338  | 0.460628 | 0.575785 |
| NFKBIE   | -0.16468 | -0.78355 | 0.434155 | 0.550008 | 0.432536 | 0.548545 |
| NFKBIL1  | -0.10379 | -0.76358 | 0.445945 | 0.561162 | 0.448004 | 0.562699 |
| NFRKB    | 0.458049 | 4.496329 | 1.12E-05 | 8.03E-05 | 1.49E-05 | 0.000103 |
| NFS1     | 0.144815 | 0.936459 | 0.350073 | 0.465839 | 0.350744 | 0.466336 |
| NFX1     | -0.29683 | -1.54024 | 0.124953 | 0.20907  | 0.124032 | 0.207561 |
| NFYA     | 0.296078 | 1.853091 | 0.065221 | 0.124609 | 0.065398 | 0.124543 |
| NFYB     | 0.265337 | 1.628041 | 0.104961 | 0.182035 | 0.105061 | 0.181807 |
| NFYC     | 0.432408 | 2.707056 | 0.007326 | 0.019846 | 0.00736  | 0.019961 |
| NGEF     | -0.15682 | -0.81549 | 0.415685 | 0.531769 | 0.414571 | 0.530482 |
| NHLH1    | 0.45615  | 3.461186 | 0.000647 | 0.002594 | 0.000689 | 0.002742 |
| NHLRC2   | 0.551719 | 4.954403 | 1.45E-06 | 1.32E-05 | 1.86E-06 | 1.63E-05 |
| NHP2L1   | -0.09395 | -0.68784 | 0.492285 | 0.60411  | 0.494189 | 0.606288 |
| NID2     | 1.049071 | 4.676142 | 5.12E-06 | 4.01E-05 | 4.65E-06 | 3.66E-05 |
| NIN      | -0.27878 | -2.1917  | 0.02946  | 0.063743 | 0.0305   | 0.065456 |
| NINJ1    | 0.180795 | 1.147997 | 0.252228 | 0.361424 | 0.252703 | 0.361333 |
| NIPBL    | 0.237105 | 1.206074 | 0.229096 | 0.335702 | 0.22784  | 0.335103 |
| NIPSNAP1 | -0.07387 | -0.3718  | 0.7104   | 0.791017 | 0.70962  | 0.790147 |
| NISCH    | 0.051563 | 0.500553 | 0.617191 | 0.713779 | 0.622311 | 0.718992 |
| NKG7     | -0.83205 | -3.75968 | 0.000219 | 0.001021 | 0.000205 | 0.000969 |
| NKRF     | 1.461557 | 9.617602 | 1.77E-18 | 3.32E-16 | 1.78E-18 | 3.34E-16 |
| NKTR     | -0.73438 | -4.20319 | 3.84E-05 | 0.000235 | 3.76E-05 | 0.00023  |
| NKX2-5   | 1.610592 | 7.06093  | 2.18E-11 | 7.39E-10 | 1.75E-11 | 6.40E-10 |
| NLGN3    | 0.610464 | 6.888174 | 5.97E-11 | 1.79E-09 | 1.40E-10 | 3.81E-09 |
| NLK      | 0.704088 | 3.447113 | 0.00068  | 0.002703 | 0.000652 | 0.002618 |
| NMB      | 0.256737 | 0.959751 | 0.338244 | 0.453565 | 0.335459 | 0.450363 |
| NME1     | 0.457503 | 2.905843 | 0.00404  | 0.012088 | 0.004072 | 0.012181 |
| NME5     | -0.08122 | -0.29529 | 0.76805  | 0.833487 | 0.766705 | 0.832994 |
| NME6     | 1.761721 | 10.50389 | 3.79E-21 | 1.27E-18 | 3.21E-21 | 1.08E-18 |
| NMI      | -0.00639 | -0.04155 | 0.966897 | 0.977924 | 0.966947 | 0.977975 |
| NMNAT3   | 0.523518 | 3.545353 | 0.00048  | 0.002001 | 0.000493 | 0.002052 |
| NMT1     | 0.631688 | 4.168048 | 4.43E-05 | 0.000266 | 4.54E-05 | 0.000271 |
| NMU      | 1.51128  | 2.863026 | 0.004605 | 0.013512 | 0.00427  | 0.012666 |
| NNAT     | 0.932554 | 3.890393 | 0.000133 | 0.00068  | 0.000123 | 0.000634 |
| NNMT     | 0.969213 | 2.799626 | 0.005575 | 0.015776 | 0.005239 | 0.014987 |
| NNT      | 0.691767 | 2.459098 | 0.014707 | 0.035891 | 0.014106 | 0.034589 |

|        |          |          |          |          |          |          |
|--------|----------|----------|----------|----------|----------|----------|
| NODAL  | 0.714495 | 8.105535 | 3.75E-14 | 2.98E-12 | 1.13E-13 | 7.48E-12 |
| NOLC1  | -0.0889  | -0.43691 | 0.662606 | 0.752053 | 0.661616 | 0.751473 |
| NOS1   | 0.253958 | 2.81372  | 0.005345 | 0.015225 | 0.006388 | 0.017704 |
| NOS3   | -0.19922 | -0.72683 | 0.46811  | 0.583121 | 0.465467 | 0.580704 |
| NOTCH1 | -0.57048 | -4.43283 | 1.47E-05 | 0.000101 | 1.64E-05 | 0.000111 |
| NOTCH3 | -0.13672 | -1.21864 | 0.224297 | 0.331514 | 0.22935  | 0.336332 |
| NOV    | 1.325422 | 4.078756 | 6.35E-05 | 0.000359 | 5.64E-05 | 0.000323 |
| NOVA1  | 0.279473 | 1.655473 | 0.099267 | 0.174544 | 0.099144 | 0.174132 |
| NPAT   | 1.711547 | 11.63363 | 1.19E-24 | 9.33E-22 | 1.20E-24 | 9.42E-22 |
| NPC1   | 0.186472 | 0.757062 | 0.44983  | 0.564885 | 0.447512 | 0.56223  |
| NPC2   | 0.353377 | 2.088218 | 0.037939 | 0.078518 | 0.037855 | 0.078586 |
| NPDC1  | -0.79359 | -2.98967 | 0.003113 | 0.009697 | 0.002945 | 0.009234 |
| NPEPL1 | 0.026759 | 0.175151 | 0.861123 | 0.89951  | 0.861354 | 0.899636 |
| NPFF   | -0.47928 | -4.36251 | 1.98E-05 | 0.000132 | 2.44E-05 | 0.000157 |
| NPHP1  | 0.493529 | 1.849647 | 0.065718 | 0.125304 | 0.064172 | 0.12294  |
| NPIP   | -0.06401 | -0.39229 | 0.695225 | 0.778731 | 0.695318 | 0.77891  |
| NPTX1  | -0.45607 | -1.43407 | 0.152984 | 0.245568 | 0.15019  | 0.241909 |
| NPTX2  | 0.538594 | 1.268979 | 0.205802 | 0.31042  | 0.202206 | 0.306233 |
| NPTXR  | 0.581118 | 4.109947 | 5.60E-05 | 0.000324 | 5.90E-05 | 0.000336 |
| NPY    | -1.70762 | -3.3441  | 0.000972 | 0.003607 | 0.00088  | 0.00331  |
| NQO1   | 0.442293 | 1.18545  | 0.23713  | 0.34505  | 0.233606 | 0.340978 |
| NQO2   | -0.28253 | -0.71873 | 0.473078 | 0.587753 | 0.469662 | 0.584125 |
| NR0B2  | 1.334853 | 4.104655 | 5.72E-05 | 0.00033  | 5.07E-05 | 0.000295 |
| NR1D2  | 0.771098 | 2.513424 | 0.01268  | 0.031649 | 0.012097 | 0.030339 |
| NR1H2  | 0.039846 | 0.297881 | 0.766077 | 0.8325   | 0.767209 | 0.833153 |
| NR1I2  | 0.275182 | 0.922173 | 0.357458 | 0.472722 | 0.354345 | 0.469794 |
| NR2C1  | 0.252795 | 1.477437 | 0.141002 | 0.229549 | 0.140767 | 0.229326 |
| NR2C2  | 0.513599 | 3.864647 | 0.000147 | 0.000739 | 0.000158 | 0.000784 |
| NR2F1  | 0.319125 | 1.178533 | 0.239869 | 0.348173 | 0.237121 | 0.345155 |
| NR2F2  | 0.767378 | 3.059409 | 0.002496 | 0.008079 | 0.002365 | 0.007715 |
| NR2F6  | -0.72667 | -4.6009  | 7.14E-06 | 5.34E-05 | 7.21E-06 | 5.42E-05 |
| NR4A1  | 0.711743 | 3.626096 | 0.000358 | 0.001555 | 0.000345 | 0.001502 |
| NR4A2  | 1.142691 | 2.96865  | 0.003325 | 0.010219 | 0.003091 | 0.009622 |
| NR4A3  | 1.217408 | 3.619014 | 0.000368 | 0.001587 | 0.000333 | 0.001463 |
| NR5A2  | 0.852717 | 2.840884 | 0.004925 | 0.014316 | 0.004649 | 0.013598 |
| NR6A1  | 0.718331 | 9.695327 | 1.04E-18 | 2.04E-16 | 9.67E-18 | 1.75E-15 |
| NRCAM  | -0.35801 | -0.99127 | 0.322654 | 0.436821 | 0.319074 | 0.43255  |
| NRD1   | 0.398502 | 2.949668 | 0.003528 | 0.010747 | 0.003678 | 0.011119 |
| NRF1   | -0.22627 | -2.77901 | 0.005928 | 0.016615 | 0.007451 | 0.020173 |
| NRG1   | 0.387641 | 1.996114 | 0.047166 | 0.094492 | 0.046599 | 0.093557 |
| NRGN   | 1.422588 | 6.864727 | 6.83E-11 | 2.01E-09 | 5.76E-11 | 1.77E-09 |

|        |          |          |          |          |          |          |
|--------|----------|----------|----------|----------|----------|----------|
| NRIP1  | -0.35084 | -1.4115  | 0.159524 | 0.253984 | 0.157359 | 0.251219 |
| NRK    | -0.08444 | -0.26531 | 0.79102  | 0.849393 | 0.789623 | 0.848475 |
| NRP1   | 0.155333 | 1.146091 | 0.253014 | 0.361729 | 0.255193 | 0.36423  |
| NRP2   | 0.085489 | 0.549388 | 0.583301 | 0.686925 | 0.583781 | 0.687317 |
| NRXN1  | -0.19909 | -1.78494 | 0.075661 | 0.140778 | 0.078927 | 0.145075 |
| NRXN3  | -0.51996 | -1.65    | 0.100383 | 0.175898 | 0.09809  | 0.172992 |
| NSD1   | 0.001083 | 0.007266 | 0.994209 | 0.996329 | 0.994222 | 0.996342 |
| NSDHL  | -0.0773  | -0.42099 | 0.674177 | 0.761874 | 0.673653 | 0.760732 |
| NSF    | 0.675207 | 2.328404 | 0.020807 | 0.047984 | 0.02001  | 0.046297 |
| NSFL1C | 0.235643 | 1.581407 | 0.115235 | 0.195878 | 0.116026 | 0.197194 |
| NSMAF  | 0.553546 | 3.009704 | 0.002923 | 0.009196 | 0.00287  | 0.009065 |
| NSMCE1 | -0.54947 | -3.38589 | 0.000841 | 0.003215 | 0.000843 | 0.003202 |
| NSUN2  | -0.46147 | -2.44412 | 0.015315 | 0.037084 | 0.01509  | 0.036652 |
| NSUN4  | 0.574192 | 4.438958 | 1.44E-05 | 9.89E-05 | 1.59E-05 | 0.000109 |
| NT5C   | 0.071933 | 0.657589 | 0.511496 | 0.623535 | 0.516527 | 0.628444 |
| NT5C2  | -0.04625 | -0.23588 | 0.81375  | 0.866235 | 0.813266 | 0.865961 |
| NT5E   | 1.264573 | 3.565244 | 0.000447 | 0.001885 | 0.000405 | 0.001719 |
| NTHL1  | -0.53552 | -2.47972 | 0.013906 | 0.034201 | 0.013538 | 0.033435 |
| NUBP1  | 0.06081  | 0.355057 | 0.72289  | 0.800751 | 0.72274  | 0.80137  |
| NUBP2  | -0.4411  | -3.09497 | 0.002226 | 0.007332 | 0.002296 | 0.007516 |
| NUCB1  | -0.26108 | -1.68167 | 0.094065 | 0.16759  | 0.09448  | 0.167885 |
| NUCB2  | 0.617729 | 2.393345 | 0.017543 | 0.041517 | 0.016926 | 0.04028  |
| NUDT1  | -0.05422 | -0.2871  | 0.774307 | 0.838342 | 0.77384  | 0.837684 |
| NUDT4  | -0.04952 | -0.19227 | 0.847711 | 0.889141 | 0.846886 | 0.88907  |
| NUDT5  | -0.26962 | -1.29015 | 0.198366 | 0.302016 | 0.196812 | 0.300427 |
| NUMA1  | -0.24642 | -1.14599 | 0.253056 | 0.361729 | 0.251258 | 0.360127 |
| NUMB   | 0.338575 | 2.410081 | 0.016779 | 0.039963 | 0.017165 | 0.040614 |
| NUP107 | 0.294336 | 1.110852 | 0.267856 | 0.378168 | 0.265132 | 0.375432 |
| NUP153 | 1.308013 | 8.784291 | 4.71E-16 | 5.98E-14 | 4.93E-16 | 6.09E-14 |
| NUP155 | 0.094861 | 0.422773 | 0.672878 | 0.760771 | 0.671571 | 0.759477 |
| NUP210 | -0.68779 | -2.97412 | 0.003269 | 0.010108 | 0.003128 | 0.009717 |
| NUP35  | 0.299421 | 1.743421 | 0.08267  | 0.150019 | 0.082463 | 0.149992 |
| NUP50  | 0.344391 | 1.56122  | 0.119922 | 0.201875 | 0.118415 | 0.199911 |
| NUP54  | -0.05077 | -0.55637 | 0.578526 | 0.682829 | 0.58645  | 0.689769 |
| NUP62  | 0.58493  | 3.413129 | 0.000766 | 0.00297  | 0.000758 | 0.00295  |
| NUP88  | 0.322086 | 2.088309 | 0.037931 | 0.078518 | 0.038194 | 0.07908  |
| NUP98  | -0.12018 | -0.58231 | 0.560957 | 0.667637 | 0.559662 | 0.666011 |
| NUPL2  | 0.484928 | 2.987678 | 0.003133 | 0.009739 | 0.00314  | 0.009748 |
| NUTF2  | -0.07317 | -0.52132 | 0.602671 | 0.701996 | 0.604007 | 0.703621 |
| NVL    | -0.05059 | -0.38151 | 0.703193 | 0.785597 | 0.704672 | 0.786129 |
| NXT2   | 0.932584 | 3.76891  | 0.000211 | 0.000993 | 0.000195 | 0.000928 |

|         |          |          |          |          |          |          |
|---------|----------|----------|----------|----------|----------|----------|
| OAS1    | 0.05935  | 0.178503 | 0.858494 | 0.897447 | 0.857506 | 0.897157 |
| OAS2    | 0.963933 | 3.847074 | 0.000157 | 0.000779 | 0.000145 | 0.000728 |
| OAT     | 1.169158 | 4.355673 | 2.04E-05 | 0.000134 | 1.82E-05 | 0.000122 |
| OAZ1    | 0.053087 | 0.554281 | 0.579955 | 0.68384  | 0.586839 | 0.689881 |
| OBFC1   | 1.020997 | 7.290728 | 5.62E-12 | 2.28E-10 | 6.32E-12 | 2.56E-10 |
| OCIAD1  | 0.43464  | 2.387996 | 0.017794 | 0.041962 | 0.017604 | 0.041495 |
| OCLN    | 0.840499 | 2.882329 | 0.004342 | 0.012873 | 0.004099 | 0.012248 |
| OCRL    | 0.316996 | 2.196877 | 0.029083 | 0.063078 | 0.029547 | 0.063966 |
| ODC1    | -0.05831 | -0.20283 | 0.83946  | 0.883642 | 0.838469 | 0.882796 |
| ODF2    | -0.10869 | -0.66303 | 0.508011 | 0.620492 | 0.508108 | 0.620449 |
| ODF3L1  | 1.007264 | 5.388543 | 1.84E-07 | 2.12E-06 | 1.72E-07 | 1.99E-06 |
| ODZ3    | 0.059549 | 0.44704  | 0.65529  | 0.747134 | 0.656934 | 0.747949 |
| OFD1    | 0.129927 | 0.725533 | 0.468903 | 0.583955 | 0.468316 | 0.583378 |
| OGFR    | 0.248839 | 2.700058 | 0.007477 | 0.020196 | 0.008744 | 0.023088 |
| OLFM1   | 0.601939 | 2.266651 | 0.024393 | 0.054619 | 0.023583 | 0.053238 |
| OLFML2A | 0.968095 | 4.201935 | 3.86E-05 | 0.000236 | 3.55E-05 | 0.000219 |
| OLR1    | 0.210746 | 0.437872 | 0.661913 | 0.751628 | 0.659283 | 0.749185 |
| OPA1    | 0.973916 | 5.597242 | 6.51E-08 | 8.38E-07 | 6.24E-08 | 8.01E-07 |
| OPCML   | 0.520699 | 3.641883 | 0.000338 | 0.001484 | 0.000352 | 0.001525 |
| OPHN1   | 0.430192 | 1.417876 | 0.157655 | 0.25152  | 0.154932 | 0.248018 |
| OPTN    | 0.467866 | 2.540134 | 0.011777 | 0.029632 | 0.011621 | 0.029334 |
| ORMDL1  | 0.182472 | 0.625423 | 0.532348 | 0.641877 | 0.529746 | 0.639038 |
| OSBP    | 0.487326 | 3.630936 | 0.000352 | 0.001532 | 0.000374 | 0.001609 |
| OSBPL10 | 0.642636 | 4.939293 | 1.56E-06 | 1.40E-05 | 1.76E-06 | 1.56E-05 |
| OSBPL11 | 1.181063 | 5.688099 | 4.11E-08 | 5.51E-07 | 3.65E-08 | 4.99E-07 |
| OSBPL2  | -0.04138 | -0.26171 | 0.79379  | 0.851395 | 0.793982 | 0.851451 |
| OSBPL6  | 1.101383 | 5.2573   | 3.48E-07 | 3.71E-06 | 3.14E-07 | 3.38E-06 |
| OSBPL8  | 0.062928 | 0.347533 | 0.728526 | 0.805096 | 0.728137 | 0.804388 |
| OSBPL9  | 0.705008 | 4.412755 | 1.60E-05 | 0.000109 | 1.61E-05 | 0.00011  |
| OSGEP   | -0.04117 | -0.4432  | 0.658064 | 0.748162 | 0.664412 | 0.754102 |
| OSMR    | 1.65463  | 4.376295 | 1.87E-05 | 0.000125 | 1.61E-05 | 0.00011  |
| OSTF1   | 0.298162 | 1.803109 | 0.072752 | 0.136283 | 0.072753 | 0.136176 |
| OSTM1   | 1.177707 | 6.948537 | 4.21E-11 | 1.32E-09 | 3.98E-11 | 1.26E-09 |
| OTC     | 0.142909 | 0.298164 | 0.765862 | 0.832459 | 0.763978 | 0.830988 |
| OTOF    | 0.021668 | 0.299584 | 0.76478  | 0.831766 | 0.773349 | 0.837498 |
| OTUB1   | 0.06784  | 0.426398 | 0.670239 | 0.759194 | 0.670493 | 0.75917  |
| OVGP1   | -0.15882 | -0.9778  | 0.329258 | 0.444049 | 0.329448 | 0.444433 |
| OVOL1   | 0.532166 | 2.676663 | 0.008001 | 0.021391 | 0.007819 | 0.020963 |
| OXA1L   | 0.097781 | 0.658785 | 0.510729 | 0.623002 | 0.511707 | 0.624033 |
| OXSRI   | 0.401801 | 2.666454 | 0.00824  | 0.021881 | 0.008357 | 0.022165 |
| OXTR    | 0.149628 | 0.348897 | 0.727503 | 0.804344 | 0.72541  | 0.80256  |

|          |          |          |          |          |          |          |
|----------|----------|----------|----------|----------|----------|----------|
| P2RX1    | 0.632372 | 2.931833 | 0.003729 | 0.011249 | 0.003596 | 0.010918 |
| P2RX4    | -0.3003  | -1.39874 | 0.163313 | 0.258354 | 0.161724 | 0.256186 |
| P2RY10   | -0.42007 | -3.17879 | 0.001694 | 0.005794 | 0.001787 | 0.006064 |
| P2RY2    | 0.185789 | 0.895671 | 0.371417 | 0.487887 | 0.369805 | 0.485999 |
| P2RY6    | 1.420919 | 7.693376 | 4.90E-13 | 2.61E-11 | 4.26E-13 | 2.30E-11 |
| P4HA1    | -0.41348 | -3.42106 | 0.000745 | 0.002912 | 0.000818 | 0.003136 |
| P4HA2    | -0.09768 | -0.6733  | 0.50147  | 0.613938 | 0.502691 | 0.615434 |
| PA2G4    | 0.098096 | 0.611407 | 0.541568 | 0.650535 | 0.541829 | 0.650321 |
| PABPC1   | 0.15323  | 1.503526 | 0.134151 | 0.220998 | 0.140053 | 0.228623 |
| PABPC4   | 0.228653 | 1.233934 | 0.218556 | 0.324707 | 0.217696 | 0.323743 |
| PABPN1   | 0.017331 | 0.097791 | 0.922188 | 0.946118 | 0.9221   | 0.946052 |
| PACRG    | -0.27963 | -1.627   | 0.105181 | 0.182215 | 0.104945 | 0.18174  |
| PAEP     | -0.07335 | -0.21108 | 0.833025 | 0.879824 | 0.831831 | 0.879037 |
| PAFAH1B1 | -0.02582 | -0.20575 | 0.837177 | 0.881964 | 0.838285 | 0.882796 |
| PAFAH1B2 | -0.41433 | -2.39702 | 0.017373 | 0.041175 | 0.017279 | 0.04081  |
| PAFAH1B3 | -0.2796  | -1.33542 | 0.183132 | 0.283738 | 0.181605 | 0.281697 |
| PAFAH2   | 0.354625 | 2.180458 | 0.030294 | 0.065103 | 0.030341 | 0.065204 |
| PAIP1    | 0.540092 | 2.421792 | 0.016262 | 0.038956 | 0.015814 | 0.038076 |
| PAK1     | 0.872642 | 3.723841 | 0.00025  | 0.001149 | 0.000233 | 0.001085 |
| PAK1IP1  | 0.552866 | 3.433023 | 0.000714 | 0.00283  | 0.000717 | 0.00282  |
| PAK2     | 0.352403 | 1.751919 | 0.081194 | 0.148141 | 0.080278 | 0.146697 |
| PAK4     | 0.347679 | 2.023054 | 0.044289 | 0.089645 | 0.044139 | 0.08942  |
| PALM     | 0.776823 | 3.999977 | 8.68E-05 | 0.000471 | 8.30E-05 | 0.000452 |
| PANK3    | 0.407842 | 2.345744 | 0.019887 | 0.046157 | 0.019772 | 0.045937 |
| PANX1    | 1.206821 | 6.121397 | 4.26E-09 | 7.26E-08 | 3.80E-09 | 6.72E-08 |
| PAPOLA   | 0.731177 | 3.741251 | 0.000234 | 0.001087 | 0.000225 | 0.001048 |
| PAPPA    | 0.018408 | 0.098354 | 0.921742 | 0.946099 | 0.921586 | 0.945939 |
| PAPSS1   | -0.12216 | -0.63436 | 0.526509 | 0.636796 | 0.525514 | 0.636075 |
| PAPSS2   | 0.419575 | 1.119143 | 0.264311 | 0.374288 | 0.260712 | 0.370307 |
| PARD3    | 0.439566 | 2.211856 | 0.028015 | 0.06127  | 0.027564 | 0.060452 |
| PARD6A   | -0.31465 | -2.24839 | 0.025552 | 0.056728 | 0.026089 | 0.057681 |
| PARN     | 0.282368 | 1.616234 | 0.10749  | 0.185222 | 0.107154 | 0.18477  |
| PARP10   | -0.08152 | -1.04561 | 0.296901 | 0.40994  | 0.312249 | 0.425752 |
| PARP16   | 0.421737 | 2.735065 | 0.00675  | 0.018531 | 0.006822 | 0.018739 |
| PARP2    | -0.13799 | -0.99323 | 0.321701 | 0.43611  | 0.323604 | 0.437832 |
| PARP4    | 0.06767  | 0.417439 | 0.676768 | 0.76315  | 0.676904 | 0.763487 |
| PARVB    | 0.20992  | 0.794756 | 0.42762  | 0.54334  | 0.424999 | 0.540887 |
| PARVG    | -0.07479 | -0.53194 | 0.595306 | 0.696004 | 0.596645 | 0.697224 |
| PASK     | -0.06219 | -0.26015 | 0.794996 | 0.852299 | 0.794023 | 0.851451 |
| PAX5     | -0.50762 | -2.26191 | 0.024689 | 0.055178 | 0.024077 | 0.054052 |
| PAX6     | 0.351012 | 0.881535 | 0.378999 | 0.495769 | 0.375302 | 0.491479 |

|         |          |          |          |          |          |          |
|---------|----------|----------|----------|----------|----------|----------|
| PAX8    | 0.406072 | 4.541845 | 9.23E-06 | 6.71E-05 | 1.41E-05 | 9.83E-05 |
| PBX1    | 1.162087 | 4.6028   | 7.08E-06 | 5.30E-05 | 6.30E-06 | 4.83E-05 |
| PBX3    | 0.53877  | 4.203854 | 3.83E-05 | 0.000235 | 4.24E-05 | 0.000256 |
| PCBP1   | -0.25254 | -2.1179  | 0.035316 | 0.073804 | 0.036891 | 0.076823 |
| PCBP2   | -0.40915 | -2.47428 | 0.014114 | 0.034603 | 0.014108 | 0.034589 |
| PCCB    | 0.239452 | 1.598463 | 0.111388 | 0.190858 | 0.112123 | 0.191628 |
| PCDH1   | 0.372726 | 3.1446   | 0.001895 | 0.006389 | 0.00207  | 0.006885 |
| PCDH9   | 0.787278 | 2.736185 | 0.006728 | 0.018518 | 0.006389 | 0.017704 |
| PCDHGC3 | -0.03489 | -0.3614  | 0.718152 | 0.797758 | 0.722938 | 0.80137  |
| PCGF2   | 0.407402 | 2.37283  | 0.018522 | 0.043374 | 0.018437 | 0.043198 |
| PCK2    | -0.81323 | -3.24956 | 0.001339 | 0.004742 | 0.001261 | 0.0045   |
| PCM1    | 0.390292 | 2.389806 | 0.017709 | 0.041782 | 0.01773  | 0.041748 |
| PCMT1   | 0.415127 | 2.412934 | 0.016652 | 0.039768 | 0.01657  | 0.039511 |
| PCNA    | -0.38284 | -2.0364  | 0.042919 | 0.087212 | 0.042479 | 0.086392 |
| PCNP    | 0.087557 | 0.623176 | 0.53382  | 0.643322 | 0.535315 | 0.644462 |
| PCNX    | 0.64963  | 3.841921 | 0.00016  | 0.000789 | 0.000159 | 0.000787 |
| PCNXL2  | 0.43335  | 3.560144 | 0.000455 | 0.001911 | 0.000502 | 0.002079 |
| PCOLCE  | 0.183482 | 1.004502 | 0.316251 | 0.430335 | 0.315457 | 0.429035 |
| PCP4    | -0.37801 | -0.77883 | 0.436925 | 0.553069 | 0.43312  | 0.548696 |
| PCSK7   | -0.59035 | -3.84825 | 0.000156 | 0.000777 | 0.000159 | 0.000789 |
| PCYOX1  | 0.860011 | 4.412611 | 1.61E-05 | 0.000109 | 1.52E-05 | 0.000105 |
| PDCD10  | 0.087533 | 0.489874 | 0.624716 | 0.720885 | 0.624272 | 0.72002  |
| PDCD2   | 0.380887 | 2.301425 | 0.022312 | 0.050808 | 0.022305 | 0.050865 |
| PDCD4   | 0.109879 | 0.409269 | 0.682744 | 0.768966 | 0.681005 | 0.767192 |
| PDCD5   | -0.58636 | -2.60083 | 0.009936 | 0.025745 | 0.009617 | 0.025042 |
| PDCD6   | -0.03684 | -0.21186 | 0.832416 | 0.879379 | 0.832279 | 0.879037 |
| PDCL    | 0.730634 | 6.218911 | 2.52E-09 | 4.74E-08 | 3.34E-09 | 6.04E-08 |
| PDE10A  | 0.282683 | 1.569482 | 0.117986 | 0.199632 | 0.117454 | 0.198574 |
| PDE1A   | 0.402398 | 1.788187 | 0.075135 | 0.13991  | 0.073888 | 0.13812  |
| PDE1B   | 1.003988 | 6.512124 | 5.04E-10 | 1.14E-08 | 5.15E-10 | 1.18E-08 |
| PDE2A   | 0.444666 | 2.121826 | 0.034981 | 0.073235 | 0.034341 | 0.072215 |
| PDE4A   | 0.574804 | 5.018473 | 1.08E-06 | 1.03E-05 | 1.35E-06 | 1.25E-05 |
| PDE4B   | 0.091727 | 0.357829 | 0.720817 | 0.799396 | 0.71936  | 0.798346 |
| PDE4C   | 0.252844 | 1.730967 | 0.084873 | 0.153188 | 0.085692 | 0.154964 |
| PDE4D   | 0.441445 | 2.437552 | 0.015588 | 0.037596 | 0.015424 | 0.037252 |
| PDE4DIP | 0.28302  | 1.586812 | 0.114005 | 0.194209 | 0.113537 | 0.193623 |
| PDE5A   | 0.473266 | 3.218415 | 0.001485 | 0.005183 | 0.001523 | 0.005302 |
| PDE6D   | -0.06153 | -0.46899 | 0.639548 | 0.734491 | 0.641403 | 0.736164 |
| PDE6G   | 0.339408 | 3.319407 | 0.001057 | 0.003864 | 0.001247 | 0.004456 |
| PDE7A   | -0.38312 | -1.95527 | 0.051829 | 0.102611 | 0.051201 | 0.101667 |
| PDE8A   | 0.222369 | 1.491561 | 0.13726  | 0.225331 | 0.138113 | 0.22602  |



|         |          |          |          |          |          |          |
|---------|----------|----------|----------|----------|----------|----------|
| PDE8B   | 0.242831 | 0.86245  | 0.389388 | 0.505699 | 0.386487 | 0.503182 |
| PDE9A   | 0.222564 | 1.249642 | 0.21277  | 0.31787  | 0.212198 | 0.31752  |
| PDGFD   | 1.312783 | 4.16535  | 4.48E-05 | 0.000268 | 3.97E-05 | 0.000242 |
| PDGFRA  | 0.15541  | 1.299569 | 0.195121 | 0.298759 | 0.19892  | 0.302859 |
| PDGFRL  | 0.244269 | 0.705215 | 0.481429 | 0.594357 | 0.478257 | 0.591405 |
| PDHA1   | 1.120417 | 5.480319 | 1.17E-07 | 1.39E-06 | 1.05E-07 | 1.28E-06 |
| PDK1    | -0.85259 | -3.23924 | 0.001386 | 0.004886 | 0.0013   | 0.004626 |
| PDK2    | 0.557563 | 3.944414 | 0.000108 | 0.000565 | 0.000113 | 0.00059  |
| PDK3    | 0.832824 | 2.888303 | 0.004264 | 0.012675 | 0.004027 | 0.012069 |
| PDK4    | 1.452586 | 2.971491 | 0.003296 | 0.010178 | 0.003044 | 0.0095   |
| PDLIM3  | -0.02058 | -0.07072 | 0.943687 | 0.962111 | 0.943331 | 0.961956 |
| PDPK1   | 1.308623 | 8.201225 | 2.04E-14 | 1.68E-12 | 1.99E-14 | 1.73E-12 |
| PD XK   | -0.00051 | -0.00312 | 0.997513 | 0.998969 | 0.997514 | 0.998956 |
| PEA15   | -0.04343 | -0.30981 | 0.757    | 0.826458 | 0.757875 | 0.827029 |
| PEBP4   | -0.66424 | -3.19302 | 0.001616 | 0.005589 | 0.001555 | 0.005379 |
| PECAM1  | 0.965533 | 5.93156  | 1.17E-08 | 1.76E-07 | 1.15E-08 | 1.76E-07 |
| PEG10   | 0.369108 | 0.755854 | 0.450553 | 0.565598 | 0.446788 | 0.561621 |
| PELO    | -0.28129 | -1.03905 | 0.29993  | 0.412909 | 0.297104 | 0.409619 |
| PELP1   | 0.493779 | 3.367392 | 0.000897 | 0.003364 | 0.000922 | 0.003434 |
| PENK    | -1.27634 | -2.63573 | 0.008999 | 0.023694 | 0.008442 | 0.022379 |
| PEPD    | 0.728276 | 3.368396 | 0.000894 | 0.003358 | 0.000852 | 0.003231 |
| PER1    | -0.05782 | -0.22727 | 0.820424 | 0.871213 | 0.819473 | 0.8704   |
| PER2    | -0.19204 | -0.83036 | 0.407242 | 0.523534 | 0.405112 | 0.52108  |
| PES1    | 0.114658 | 1.147578 | 0.252401 | 0.361435 | 0.260028 | 0.369559 |
| PET112L | 0.350781 | 2.227922 | 0.026907 | 0.059234 | 0.027048 | 0.059544 |
| PEX1    | 0.28456  | 0.825844 | 0.409796 | 0.52624  | 0.40642  | 0.522191 |
| PEX11A  | 1.002252 | 4.348479 | 2.10E-05 | 0.000138 | 1.92E-05 | 0.000128 |
| PEX11B  | -0.26429 | -1.59297 | 0.112616 | 0.192611 | 0.1126   | 0.192212 |
| PEX13   | 0.589311 | 2.619366 | 0.009428 | 0.024604 | 0.009123 | 0.023901 |
| PEX14   | 0.417807 | 2.856545 | 0.004697 | 0.013703 | 0.0048   | 0.013942 |
| PEX19   | 0.308008 | 1.761838 | 0.079498 | 0.145783 | 0.079205 | 0.145423 |
| PEX5    | -0.68792 | -4.78521 | 3.15E-06 | 2.56E-05 | 3.33E-06 | 2.71E-05 |
| PEX6    | -0.28566 | -0.7218  | 0.47119  | 0.585812 | 0.467756 | 0.583144 |
| PEX7    | 0.238743 | 1.182141 | 0.238438 | 0.346416 | 0.237007 | 0.345155 |
| PFAS    | 1.25639  | 6.845868 | 7.61E-11 | 2.19E-09 | 6.86E-11 | 2.08E-09 |
| PFDN5   | 0.56456  | 4.888917 | 1.97E-06 | 1.70E-05 | 2.42E-06 | 2.04E-05 |
| PFKFB2  | 0.564297 | 2.995756 | 0.003054 | 0.009532 | 0.00299  | 0.009361 |
| PFKFB3  | 0.395145 | 1.569443 | 0.117995 | 0.199632 | 0.116051 | 0.197194 |
| PFKM    | -0.21378 | -0.93611 | 0.35025  | 0.465943 | 0.348121 | 0.46403  |
| PFKP    | 0.002605 | 0.017258 | 0.986247 | 0.991521 | 0.986273 | 0.991547 |
| PFN1    | -0.31578 | -2.4394  | 0.015511 | 0.037443 | 0.016114 | 0.038621 |

|         |          |          |          |          |          |          |
|---------|----------|----------|----------|----------|----------|----------|
| PGC     | -0.51131 | -0.80783 | 0.420068 | 0.536123 | 0.415999 | 0.531881 |
| PGD     | -0.48878 | -1.80817 | 0.071957 | 0.135118 | 0.070303 | 0.132593 |
| PGF     | 0.38958  | 2.354069 | 0.019458 | 0.045341 | 0.019451 | 0.045324 |
| PGGT1B  | 0.499513 | 2.070028 | 0.039628 | 0.081511 | 0.038654 | 0.079834 |
| PGK1    | 0.379219 | 2.18181  | 0.030193 | 0.064915 | 0.030043 | 0.064652 |
| PGLS    | 0.150455 | 1.060778 | 0.289965 | 0.40261  | 0.291603 | 0.404287 |
| PGM2    | 0.677767 | 3.687109 | 0.000286 | 0.001288 | 0.000279 | 0.001253 |
| PGM3    | 0.251461 | 1.322257 | 0.187468 | 0.289075 | 0.186477 | 0.288113 |
| PGRMC2  | 0.370566 | 2.381729 | 0.018091 | 0.042579 | 0.018224 | 0.042785 |
| PGS1    | 0.077617 | 0.639085 | 0.523438 | 0.633929 | 0.526752 | 0.636439 |
| PHACTR1 | -0.18187 | -1.2213  | 0.223292 | 0.330439 | 0.224317 | 0.331226 |
| PHACTR2 | 0.286045 | 1.447355 | 0.149234 | 0.2407   | 0.148105 | 0.239125 |
| PHC1    | 0.389506 | 2.955054 | 0.00347  | 0.010582 | 0.00364  | 0.011024 |
| PHC2    | 0.587462 | 5.995189 | 8.34E-09 | 1.31E-07 | 1.39E-08 | 2.07E-07 |
| PHF1    | 0.342614 | 3.057494 | 0.002511 | 0.008117 | 0.002788 | 0.008842 |
| PHF10   | 0.216114 | 1.470125 | 0.14297  | 0.23203  | 0.143969 | 0.233651 |
| PHF14   | 0.80241  | 5.063088 | 8.77E-07 | 8.64E-06 | 8.85E-07 | 8.72E-06 |
| PHF17   | 0.842471 | 3.854804 | 0.000152 | 0.000761 | 0.000143 | 0.000721 |
| PHF19   | -0.31702 | -1.47652 | 0.141248 | 0.22987  | 0.139746 | 0.228216 |
| PHF20   | 0.616462 | 2.876701 | 0.004418 | 0.013067 | 0.004268 | 0.012666 |
| PHF20L1 | -0.26813 | -1.31916 | 0.1885   | 0.29038  | 0.187117 | 0.288817 |
| PHF3    | 0.342336 | 2.725829 | 0.006935 | 0.018951 | 0.007317 | 0.019855 |
| PHF8    | 0.050692 | 0.399472 | 0.689937 | 0.774749 | 0.691862 | 0.775889 |
| PHIP    | 1.172503 | 6.186788 | 3.00E-09 | 5.55E-08 | 2.72E-09 | 5.07E-08 |
| PHKA1   | 1.235997 | 5.023658 | 1.05E-06 | 1.01E-05 | 9.24E-07 | 9.03E-06 |
| PHKA2   | 1.3585   | 7.608366 | 8.24E-13 | 3.99E-11 | 7.37E-13 | 3.61E-11 |
| PHKB    | 0.671655 | 4.14647  | 4.84E-05 | 0.000286 | 4.85E-05 | 0.000285 |
| PHKG2   | -0.40499 | -3.33893 | 0.000989 | 0.003652 | 0.001081 | 0.003932 |
| PHLDA2  | -0.11803 | -0.92455 | 0.356222 | 0.471743 | 0.359278 | 0.474594 |
| PHLDA3  | -0.31529 | -1.41662 | 0.15802  | 0.251932 | 0.15629  | 0.249766 |
| PHPT1   | -0.74509 | -4.60036 | 7.15E-06 | 5.34E-05 | 7.16E-06 | 5.38E-05 |
| PHTF1   | 1.186502 | 6.425495 | 8.15E-10 | 1.76E-08 | 7.42E-10 | 1.62E-08 |
| PHYH    | 0.675588 | 2.502716 | 0.013058 | 0.032508 | 0.012533 | 0.031331 |
| PI3     | 2.813738 | 4.386316 | 1.79E-05 | 0.000121 | 1.51E-05 | 0.000104 |
| PIAS1   | 0.616095 | 3.432049 | 0.000717 | 0.002835 | 0.000703 | 0.002781 |
| PIAS2   | 0.644999 | 3.747263 | 0.000229 | 0.001065 | 0.000226 | 0.001052 |
| PIAS4   | 0.530792 | 5.053819 | 9.16E-07 | 8.95E-06 | 1.25E-06 | 1.17E-05 |
| PICALM  | 0.803662 | 3.852558 | 0.000154 | 0.000766 | 0.000145 | 0.000731 |
| PIGC    | -0.06324 | -0.38279 | 0.702245 | 0.784911 | 0.702269 | 0.784691 |
| PIGF    | -0.18065 | -1.03225 | 0.303097 | 0.416378 | 0.302635 | 0.415902 |
| PIGL    | 0.075993 | 0.545215 | 0.586163 | 0.689259 | 0.58761  | 0.690614 |

|         |          |          |          |          |          |          |
|---------|----------|----------|----------|----------|----------|----------|
| PIGN    | 0.299722 | 1.275994 | 0.203315 | 0.307725 | 0.201196 | 0.305433 |
| PIGR    | -1.29717 | -2.35932 | 0.019192 | 0.044793 | 0.018183 | 0.042709 |
| PIGT    | 0.218037 | 1.764219 | 0.079096 | 0.145499 | 0.081304 | 0.148341 |
| PIK3C2A | -0.56399 | -2.34719 | 0.019812 | 0.046006 | 0.01921  | 0.044807 |
| PIK3C2B | 0.972709 | 5.303522 | 2.78E-07 | 3.04E-06 | 2.62E-07 | 2.88E-06 |
| PIK3C2G | 0.482194 | 0.957698 | 0.339276 | 0.45469  | 0.335235 | 0.450301 |
| PIK3C3  | 0.230475 | 1.449783 | 0.148556 | 0.239771 | 0.148878 | 0.240043 |
| PIK3CA  | 0.66426  | 3.708965 | 0.000264 | 0.001203 | 0.000258 | 0.001182 |
| PIK3CB  | 1.095796 | 5.647109 | 5.06E-08 | 6.66E-07 | 4.62E-08 | 6.15E-07 |
| PIK3CD  | -0.26783 | -2.29384 | 0.022752 | 0.051635 | 0.024025 | 0.054003 |
| PIK3CG  | 0.559802 | 2.709146 | 0.007282 | 0.019737 | 0.007085 | 0.019336 |
| PIK3R2  | 0.604794 | 4.387216 | 1.79E-05 | 0.00012  | 1.92E-05 | 0.000128 |
| PILRA   | 0.18407  | 1.275258 | 0.203575 | 0.307951 | 0.204909 | 0.309271 |
| PILRB   | -0.24102 | -1.00036 | 0.318243 | 0.432171 | 0.315861 | 0.429308 |
| PIM1    | 0.174634 | 0.861771 | 0.389761 | 0.505822 | 0.388299 | 0.504564 |
| PIM2    | -0.15966 | -0.62783 | 0.530773 | 0.6406   | 0.528562 | 0.637966 |
| PIN1    | 0.198315 | 1.513703 | 0.13155  | 0.218166 | 0.133689 | 0.220626 |
| PINX1   | 0.55012  | 2.191039 | 0.029509 | 0.063749 | 0.028654 | 0.062349 |
| PIP5K1A | 0.073498 | 0.442854 | 0.65831  | 0.748261 | 0.65831  | 0.748753 |
| PIP5K1B | -0.00039 | -0.00175 | 0.998605 | 0.999243 | 0.998599 | 0.999237 |
| PIP5K1C | 0.00915  | 0.07861  | 0.937415 | 0.957377 | 0.938007 | 0.957982 |
| PIPOX   | 0.487063 | 1.150006 | 0.251402 | 0.36068  | 0.247641 | 0.35681  |
| PIR     | 0.474451 | 1.239021 | 0.21667  | 0.322473 | 0.213176 | 0.318476 |
| PISD    | -0.15228 | -1.09964 | 0.2727   | 0.383371 | 0.274624 | 0.385409 |
| PITPNA  | -0.34131 | -2.0605  | 0.040538 | 0.08317  | 0.040528 | 0.083217 |
| PITPNB  | 0.487781 | 3.531699 | 0.000504 | 0.002089 | 0.000529 | 0.002182 |
| PITPNC1 | 0.496595 | 2.444804 | 0.015287 | 0.037035 | 0.014964 | 0.036422 |
| PITX2   | -1.30325 | -2.93195 | 0.003728 | 0.011249 | 0.003457 | 0.010556 |
| PKHD1   | 0.221471 | 2.143499 | 0.033181 | 0.070279 | 0.035752 | 0.074737 |
| PKIA    | -0.12797 | -0.40478 | 0.686038 | 0.771752 | 0.684015 | 0.76989  |
| PKIG    | 0.129275 | 0.699794 | 0.484802 | 0.597109 | 0.484014 | 0.596295 |
| PKN1    | -0.72486 | -3.963   | 0.0001   | 0.000533 | 9.73E-05 | 0.000518 |
| PKN2    | 0.424328 | 2.686351 | 0.00778  | 0.020907 | 0.00783  | 0.020981 |
| PKN3    | 1.121076 | 4.616764 | 6.66E-06 | 5.02E-05 | 5.96E-06 | 4.58E-05 |
| PKNOX1  | 0.351347 | 3.561109 | 0.000453 | 0.001906 | 0.000558 | 0.002286 |
| PKNOX2  | 0.650072 | 6.011985 | 7.63E-09 | 1.21E-07 | 1.11E-08 | 1.71E-07 |
| PKP2    | -0.24061 | -0.82822 | 0.408449 | 0.524798 | 0.405488 | 0.521279 |
| PKP4    | 0.487178 | 2.245668 | 0.025728 | 0.057039 | 0.025151 | 0.056016 |
| PLA2G2A | -0.64173 | -1.02117 | 0.308303 | 0.421965 | 0.30408  | 0.417521 |
| PLA2G5  | -0.13777 | -0.45814 | 0.647305 | 0.74056  | 0.645158 | 0.739328 |
| PLA2G6  | 0.056543 | 0.49664  | 0.619943 | 0.716609 | 0.623552 | 0.719726 |

|         |          |          |          |          |          |          |
|---------|----------|----------|----------|----------|----------|----------|
| PLA2G7  | 1.505852 | 4.325625 | 2.32E-05 | 0.00015  | 2.02E-05 | 0.000133 |
| PLA2R1  | -0.19469 | -1.73218 | 0.084656 | 0.152856 | 0.088032 | 0.158342 |
| PLAA    | 0.391534 | 1.896675 | 0.059193 | 0.114914 | 0.058346 | 0.113411 |
| PLAGL1  | 1.156389 | 3.328719 | 0.001024 | 0.003758 | 0.00094  | 0.003494 |
| PLAGL2  | 1.092019 | 5.595578 | 6.56E-08 | 8.43E-07 | 5.99E-08 | 7.79E-07 |
| PLAT    | 0.038344 | 0.115453 | 0.908192 | 0.936486 | 0.907548 | 0.935821 |
| PLAU    | 0.794095 | 2.84002  | 0.004938 | 0.014332 | 0.004679 | 0.013661 |
| PLAUR   | 0.118134 | 0.439373 | 0.660827 | 0.750576 | 0.65898  | 0.749022 |
| PLB1    | -0.02612 | -0.33694 | 0.736488 | 0.811605 | 0.744561 | 0.817552 |
| PLCB1   | 0.824509 | 4.44304  | 1.41E-05 | 9.77E-05 | 1.35E-05 | 9.45E-05 |
| PLCB2   | 0.483347 | 6.062635 | 5.83E-09 | 9.45E-08 | 1.47E-08 | 2.18E-07 |
| PLCB4   | 0.685256 | 1.442497 | 0.150597 | 0.24247  | 0.147248 | 0.237987 |
| PLCD1   | 0.389998 | 3.178917 | 0.001693 | 0.005794 | 0.00183  | 0.006174 |
| PLCG1   | -0.07341 | -0.64456 | 0.519889 | 0.631554 | 0.524189 | 0.634925 |
| PLCG2   | -0.07106 | -0.5197  | 0.603802 | 0.703139 | 0.605386 | 0.704983 |
| PLCL2   | 0.282778 | 0.865862 | 0.387518 | 0.503827 | 0.384215 | 0.501196 |
| PLCXD1  | -0.01529 | -0.07553 | 0.939863 | 0.959461 | 0.939679 | 0.959273 |
| PLD1    | -0.2719  | -0.87456 | 0.382774 | 0.500149 | 0.379582 | 0.496117 |
| PLD2    | -0.01883 | -0.1738  | 0.862181 | 0.900208 | 0.86386  | 0.901853 |
| PLEK    | -0.44694 | -2.0754  | 0.039123 | 0.080683 | 0.038374 | 0.079382 |
| PLEK2   | -0.08874 | -0.34353 | 0.731534 | 0.80785  | 0.730112 | 0.80628  |
| PLEKHA1 | 1.099636 | 4.397309 | 1.71E-05 | 0.000116 | 1.54E-05 | 0.000106 |
| PLEKHA3 | 0.608071 | 3.588015 | 0.000411 | 0.001752 | 0.000408 | 0.001731 |
| PLEKHA4 | 0.055874 | 0.233046 | 0.815945 | 0.867795 | 0.815063 | 0.867088 |
| PLEKHF2 | -0.00803 | -0.04749 | 0.962163 | 0.974395 | 0.96215  | 0.974382 |
| PLEKHG1 | 0.587888 | 2.493904 | 0.013378 | 0.033197 | 0.012941 | 0.032231 |
| PLEKHH1 | 0.331678 | 1.425821 | 0.15535  | 0.248772 | 0.15345  | 0.246149 |
| PLEKHM1 | 0.317887 | 2.752601 | 0.006411 | 0.017807 | 0.006929 | 0.019001 |
| PLK1    | -0.36526 | -1.786   | 0.07549  | 0.140516 | 0.07455  | 0.138958 |
| PLK3    | 0.409536 | 2.503639 | 0.013025 | 0.03246  | 0.013038 | 0.032441 |
| PLK4    | 0.246029 | 1.215035 | 0.225667 | 0.332455 | 0.224238 | 0.331213 |
| PLN     | 0.800991 | 2.38547  | 0.017913 | 0.042223 | 0.017112 | 0.040598 |
| PLOD1   | 0.308257 | 1.763744 | 0.079176 | 0.145589 | 0.078885 | 0.145054 |
| PLOD2   | 0.971421 | 3.376777 | 0.000868 | 0.003295 | 0.000805 | 0.003103 |
| PLOD3   | 0.785976 | 3.714303 | 0.000259 | 0.001185 | 0.000245 | 0.001134 |
| PLP2    | 0.624368 | 2.260761 | 0.024761 | 0.055287 | 0.023905 | 0.053834 |
| PLS3    | 1.380167 | 7.648369 | 6.45E-13 | 3.33E-11 | 5.72E-13 | 2.92E-11 |
| PLSCR1  | 0.757017 | 4.054083 | 7.01E-05 | 0.000391 | 6.75E-05 | 0.000377 |
| PLSCR3  | 0.079371 | 0.661676 | 0.508878 | 0.621228 | 0.512439 | 0.62444  |
| PLTP    | 1.633141 | 4.944679 | 1.52E-06 | 1.37E-05 | 1.28E-06 | 1.19E-05 |
| PLXNA3  | -0.14743 | -1.02546 | 0.306285 | 0.419935 | 0.307765 | 0.421842 |

|        |          |          |          |          |          |          |
|--------|----------|----------|----------|----------|----------|----------|
| PLXNB1 | 0.621092 | 5.726003 | 3.38E-08 | 4.63E-07 | 4.75E-08 | 6.29E-07 |
| PLXNB3 | -0.82518 | -4.59943 | 7.18E-06 | 5.36E-05 | 6.93E-06 | 5.24E-05 |
| PLXNC1 | 0.392853 | 1.850716 | 0.065563 | 0.12506  | 0.064578 | 0.123473 |
| PML    | 0.900311 | 6.509041 | 5.12E-10 | 1.16E-08 | 5.76E-10 | 1.29E-08 |
| PMP22  | 0.642063 | 3.029539 | 0.002745 | 0.008723 | 0.002646 | 0.008443 |
| PMPCB  | 0.478611 | 3.681306 | 0.000293 | 0.001312 | 0.000315 | 0.001394 |
| PMS1   | 0.861724 | 5.873953 | 1.58E-08 | 2.30E-07 | 1.67E-08 | 2.45E-07 |
| PMVK   | 0.728924 | 4.855548 | 2.29E-06 | 1.94E-05 | 2.37E-06 | 2.01E-05 |
| PNOC   | -0.13316 | -0.55965 | 0.576292 | 0.681402 | 0.574458 | 0.679449 |
| PNPLA2 | -0.12231 | -0.64672 | 0.518495 | 0.630023 | 0.517596 | 0.629256 |
| PNRC1  | -0.2225  | -1.4041  | 0.161712 | 0.256512 | 0.162073 | 0.256651 |
| PODXL  | 0.154042 | 0.63351  | 0.527065 | 0.637029 | 0.524997 | 0.635622 |
| POLA2  | 0.065639 | 0.594916 | 0.552517 | 0.659094 | 0.557109 | 0.663898 |
| POLB   | -0.04209 | -0.21318 | 0.831385 | 0.878791 | 0.83093  | 0.878796 |
| POLD1  | -0.17484 | -1.22075 | 0.2235   | 0.330557 | 0.224956 | 0.331751 |
| POLD3  | 0.922356 | 5.482718 | 1.15E-07 | 1.38E-06 | 1.13E-07 | 1.36E-06 |
| POLD4  | -0.66141 | -3.43341 | 0.000713 | 0.002829 | 0.000691 | 0.002746 |
| POLE   | -0.26513 | -1.77792 | 0.07681  | 0.142466 | 0.077442 | 0.143099 |
| POLG2  | 0.518132 | 3.307978 | 0.001099 | 0.003989 | 0.001111 | 0.004024 |
| POLI   | 0.179569 | 0.935584 | 0.350523 | 0.46603  | 0.349383 | 0.465053 |
| POLK   | 1.232209 | 6.324212 | 1.42E-09 | 2.84E-08 | 1.27E-09 | 2.56E-08 |
| POLL   | 0.057967 | 0.52188  | 0.602283 | 0.701996 | 0.606381 | 0.705443 |
| POLM   | -0.26311 | -1.3272  | 0.18583  | 0.287114 | 0.184593 | 0.285485 |
| POLR1A | 0.354481 | 2.166172 | 0.031383 | 0.066954 | 0.031411 | 0.067045 |
| POLR1C | -0.02469 | -0.11762 | 0.906479 | 0.935335 | 0.906153 | 0.934999 |
| POLR2A | 0.284157 | 3.233198 | 0.001414 | 0.004975 | 0.001806 | 0.006111 |
| POLR2B | -0.13183 | -1.1875  | 0.236321 | 0.344299 | 0.241629 | 0.350403 |
| POLR2D | 0.293486 | 2.22663  | 0.026995 | 0.059343 | 0.027808 | 0.060789 |
| POLR2F | 0.136935 | 1.458876 | 0.146039 | 0.236113 | 0.153894 | 0.246776 |
| POLR2G | 0.22297  | 1.505539 | 0.133633 | 0.220377 | 0.134535 | 0.221399 |
| POLR2H | 0.519571 | 2.955905 | 0.00346  | 0.010564 | 0.003423 | 0.0105   |
| POLR2I | 0.298389 | 1.645912 | 0.101223 | 0.176792 | 0.100693 | 0.17626  |
| POLR2J | 0.110275 | 0.633444 | 0.527108 | 0.637029 | 0.526755 | 0.636439 |
| POLR2K | 0.056706 | 0.361942 | 0.717746 | 0.797496 | 0.718053 | 0.797459 |
| POLR2L | -0.1135  | -0.7995  | 0.42487  | 0.540832 | 0.426437 | 0.542132 |
| POLR3A | 0.673662 | 4.798688 | 2.96E-06 | 2.44E-05 | 3.18E-06 | 2.59E-05 |
| POLR3C | -0.12772 | -0.81658 | 0.415061 | 0.531276 | 0.415601 | 0.531516 |
| POLR3D | 0.577577 | 4.051432 | 7.08E-05 | 0.000394 | 7.42E-05 | 0.00041  |
| POMZP3 | -0.17487 | -0.40391 | 0.686678 | 0.772102 | 0.684296 | 0.769976 |
| PON2   | -0.30522 | -1.0244  | 0.30678  | 0.420369 | 0.303653 | 0.417057 |
| POSTN  | 0.335788 | 1.003203 | 0.316875 | 0.430935 | 0.313453 | 0.427226 |

|          |          |          |          |          |          |          |
|----------|----------|----------|----------|----------|----------|----------|
| POU2AF1  | -1.36655 | -4.38837 | 1.78E-05 | 0.00012  | 1.56E-05 | 0.000107 |
| POU2F1   | 0.919986 | 9.814567 | 4.59E-19 | 9.81E-17 | 1.50E-18 | 2.93E-16 |
| POU2F2   | 0.316467 | 3.271987 | 0.001242 | 0.004434 | 0.001502 | 0.005246 |
| POU4F1   | -0.30161 | -1.64688 | 0.101024 | 0.176511 | 0.100442 | 0.175951 |
| POU6F2   | -0.28946 | -2.29605 | 0.022623 | 0.051367 | 0.023528 | 0.053189 |
| PPA2     | -0.41278 | -1.53701 | 0.12574  | 0.210163 | 0.123553 | 0.20715  |
| PPARA    | -0.09535 | -0.53401 | 0.59388  | 0.69538  | 0.593411 | 0.695018 |
| PPARG    | 1.127438 | 3.465091 | 0.000638 | 0.002566 | 0.000584 | 0.002375 |
| PPAT     | 0.91767  | 4.561186 | 8.48E-06 | 6.22E-05 | 7.93E-06 | 5.86E-05 |
| PPFIA1   | 0.140938 | 0.664534 | 0.507051 | 0.619802 | 0.50551  | 0.617959 |
| PPFIBP1  | 0.574014 | 2.004392 | 0.046265 | 0.093006 | 0.044915 | 0.09082  |
| PPFIBP2  | -0.03573 | -0.26022 | 0.794941 | 0.852299 | 0.795797 | 0.853158 |
| PPIB     | 0.362999 | 2.279387 | 0.023612 | 0.053175 | 0.023708 | 0.053478 |
| PPIC     | 0.913262 | 4.058948 | 6.87E-05 | 0.000385 | 6.38E-05 | 0.000357 |
| PPIE     | 0.142895 | 0.765331 | 0.444902 | 0.5603   | 0.444008 | 0.559024 |
| PPIG     | 1.036721 | 7.945751 | 1.02E-13 | 6.87E-12 | 1.28E-13 | 8.23E-12 |
| PPIH     | 0.086058 | 0.738582 | 0.460955 | 0.576041 | 0.46519  | 0.580704 |
| PPIL2    | 0.048715 | 0.442205 | 0.658779 | 0.748432 | 0.662493 | 0.752105 |
| PPIL4    | 1.402186 | 7.684995 | 5.15E-13 | 2.72E-11 | 4.52E-13 | 2.41E-11 |
| PPL      | 0.757596 | 2.147819 | 0.032831 | 0.069633 | 0.03157  | 0.067353 |
| PPM1A    | 0.470761 | 2.872731 | 0.004471 | 0.013193 | 0.004474 | 0.013159 |
| PPM1B    | 0.650992 | 5.511837 | 9.98E-08 | 1.22E-06 | 1.26E-07 | 1.49E-06 |
| PPM1F    | 0.641984 | 6.37451  | 1.08E-09 | 2.25E-08 | 1.81E-09 | 3.54E-08 |
| PPOX     | 0.148012 | 0.888523 | 0.375239 | 0.491945 | 0.375199 | 0.491479 |
| PPP1CA   | -0.33791 | -1.88047 | 0.061378 | 0.118373 | 0.061007 | 0.117804 |
| PPP1CB   | 0.18032  | 1.262575 | 0.208091 | 0.313169 | 0.209551 | 0.314461 |
| PPP1CC   | 0.474967 | 3.828821 | 0.000168 | 0.000822 | 0.000186 | 0.000897 |
| PPP1R10  | 0.283342 | 1.643402 | 0.101741 | 0.177484 | 0.101491 | 0.177128 |
| PPP1R12B | 0.042582 | 0.229631 | 0.818594 | 0.870057 | 0.818263 | 0.869705 |
| PPP1R13L | 0.27198  | 1.31168  | 0.191008 | 0.293858 | 0.189511 | 0.291583 |
| PPP1R15A | -0.01612 | -0.07706 | 0.938646 | 0.958426 | 0.938434 | 0.95821  |
| PPP1R16B | 0.230451 | 1.146652 | 0.252782 | 0.361729 | 0.251367 | 0.360127 |
| PPP1R1A  | 0.748285 | 2.779411 | 0.005921 | 0.016605 | 0.005635 | 0.015898 |
| PPP1R2   | -0.2933  | -1.63027 | 0.104488 | 0.181349 | 0.103992 | 0.180222 |
| PPP1R3F  | 0.103712 | 0.976194 | 0.33005  | 0.444735 | 0.336424 | 0.451254 |
| PPP1R7   | -0.37199 | -2.33739 | 0.020325 | 0.047012 | 0.020413 | 0.047029 |
| PPP1R8   | 0.282    | 2.202307 | 0.028692 | 0.062431 | 0.029679 | 0.064135 |
| PPP2CA   | 0.579293 | 3.023035 | 0.002802 | 0.008863 | 0.002735 | 0.008692 |
| PPP2CB   | 0.054213 | 0.450487 | 0.652807 | 0.744888 | 0.655497 | 0.74704  |
| PPP2R1A  | -0.39647 | -2.80241 | 0.005529 | 0.01569  | 0.005685 | 0.016009 |
| PPP2R1B  | 0.555728 | 2.464334 | 0.0145   | 0.035422 | 0.014077 | 0.03455  |

|          |          |          |          |          |          |          |
|----------|----------|----------|----------|----------|----------|----------|
| PPP2R2A  | 0.087823 | 0.471196 | 0.637972 | 0.733121 | 0.637322 | 0.732287 |
| PPP2R2B  | 0.206378 | 1.421437 | 0.156619 | 0.250207 | 0.157778 | 0.251546 |
| PPP2R2D  | 0.799403 | 4.83759  | 2.48E-06 | 2.07E-05 | 2.46E-06 | 2.07E-05 |
| PPP2R4   | -0.51315 | -4.63094 | 6.25E-06 | 4.75E-05 | 7.81E-06 | 5.78E-05 |
| PPP2R5A  | 0.452492 | 4.536072 | 9.46E-06 | 6.86E-05 | 1.28E-05 | 9.05E-05 |
| PPP2R5B  | 0.141146 | 1.147768 | 0.252322 | 0.361435 | 0.255903 | 0.364951 |
| PPP2R5C  | -0.62199 | -3.80976 | 0.000181 | 0.000876 | 0.000181 | 0.000878 |
| PPP2R5E  | 0.32071  | 2.018492 | 0.044765 | 0.090493 | 0.044927 | 0.09082  |
| PPP3CA   | 0.064649 | 0.342091 | 0.732612 | 0.808658 | 0.732063 | 0.808055 |
| PPP3CB   | 1.155957 | 6.727356 | 1.50E-10 | 4.00E-09 | 1.41E-10 | 3.82E-09 |
| PPP3CC   | -0.161   | -0.86923 | 0.385677 | 0.502685 | 0.384799 | 0.50168  |
| PPP3R1   | 1.376102 | 7.572075 | 1.03E-12 | 4.84E-11 | 9.09E-13 | 4.36E-11 |
| PPP6C    | 0.204327 | 1.649004 | 0.100587 | 0.175943 | 0.103065 | 0.178946 |
| PPY      | -0.16503 | -0.71735 | 0.473924 | 0.588337 | 0.471938 | 0.586181 |
| PQBP1    | -0.1061  | -0.64133 | 0.521983 | 0.632922 | 0.522006 | 0.632653 |
| PRAF2    | 0.645123 | 4.06234  | 6.78E-05 | 0.00038  | 6.84E-05 | 0.000381 |
| PRC1     | 0.1666   | 0.680843 | 0.496693 | 0.609042 | 0.494515 | 0.60653  |
| PRCC     | 0.447346 | 2.83049  | 0.005082 | 0.014645 | 0.005116 | 0.014708 |
| PRCP     | 0.342857 | 2.98702  | 0.003139 | 0.009753 | 0.003441 | 0.01053  |
| PRDM16   | 0.277683 | 1.046583 | 0.296451 | 0.409559 | 0.293696 | 0.40659  |
| PRDM2    | 0.61944  | 4.327163 | 2.30E-05 | 0.000149 | 2.42E-05 | 0.000156 |
| PRDX1    | 0.103923 | 0.601005 | 0.548461 | 0.656579 | 0.548166 | 0.656068 |
| PRDX2    | 0.452553 | 4.207446 | 3.77E-05 | 0.000232 | 4.66E-05 | 0.000277 |
| PRDX3    | 0.457726 | 2.875346 | 0.004436 | 0.013104 | 0.004461 | 0.013128 |
| PRDX4    | 0.905812 | 4.657242 | 5.57E-06 | 4.30E-05 | 5.24E-06 | 4.10E-05 |
| PRDX5    | 0.339049 | 1.896261 | 0.059248 | 0.114973 | 0.058905 | 0.114308 |
| PRDX6    | 0.348062 | 2.219627 | 0.027474 | 0.060228 | 0.02763  | 0.060542 |
| PRELP    | 0.851979 | 2.831185 | 0.005071 | 0.014623 | 0.004789 | 0.013927 |
| PREX1    | 0.036563 | 0.278111 | 0.781191 | 0.842302 | 0.78236  | 0.843563 |
| PRF1     | -0.65331 | -3.77467 | 0.000207 | 0.000978 | 0.000204 | 0.000962 |
| PRIC285  | 0.454718 | 4.463375 | 1.29E-05 | 9.10E-05 | 1.71E-05 | 0.000116 |
| PRICKLE1 | 0.805938 | 3.384528 | 0.000845 | 0.003225 | 0.000797 | 0.003082 |
| PRIM1    | 0.502897 | 2.392739 | 0.017571 | 0.041548 | 0.017169 | 0.040614 |
| PRKAA1   | -0.10169 | -0.43762 | 0.662097 | 0.751656 | 0.660643 | 0.750549 |
| PRKAB2   | 0.295202 | 1.295829 | 0.196405 | 0.299813 | 0.194438 | 0.297576 |
| PRKACB   | -0.04322 | -0.11638 | 0.907461 | 0.936119 | 0.906768 | 0.935396 |
| PRKAG1   | 0.136009 | 1.124072 | 0.262219 | 0.37211  | 0.266083 | 0.376005 |
| PRKAG2   | 0.08872  | 0.453003 | 0.650997 | 0.743725 | 0.650139 | 0.743287 |
| PRKAR1A  | 0.681429 | 4.28331  | 2.76E-05 | 0.000174 | 2.78E-05 | 0.000176 |
| PRKAR1B  | 0.033557 | 0.245984 | 0.805926 | 0.860875 | 0.80677  | 0.86119  |
| PRKAR2B  | 1.291292 | 3.341864 | 0.000979 | 0.003627 | 0.000894 | 0.003343 |

|         |          |          |          |          |          |          |
|---------|----------|----------|----------|----------|----------|----------|
| PRKCA   | 0.156786 | 1.405994 | 0.16115  | 0.255941 | 0.165822 | 0.261971 |
| PRKCD   | 0.065084 | 0.300656 | 0.763963 | 0.831549 | 0.76308  | 0.830725 |
| PRKCH   | -0.27436 | -2.01281 | 0.045364 | 0.091547 | 0.046308 | 0.093131 |
| PRKCI   | 0.530776 | 1.627339 | 0.10511  | 0.182215 | 0.102704 | 0.17878  |
| PRKCQ   | 0.139176 | 0.600807 | 0.548593 | 0.656579 | 0.546771 | 0.655233 |
| PRKD1   | 0.380346 | 2.74707  | 0.006516 | 0.018068 | 0.006724 | 0.018492 |
| PRKD3   | 0.258655 | 1.307797 | 0.19232  | 0.295393 | 0.191083 | 0.293494 |
| PRKDC   | -0.80069 | -3.93463 | 0.000112 | 0.000584 | 0.000106 | 0.00056  |
| PRKG2   | 0.636073 | 4.641452 | 5.97E-06 | 4.58E-05 | 6.46E-06 | 4.94E-05 |
| PRKRIP1 | 0.313436 | 2.71723  | 0.007112 | 0.019344 | 0.007677 | 0.020677 |
| PRKRIR  | 0.68576  | 3.623679 | 0.000361 | 0.001567 | 0.00035  | 0.00152  |
| PRLR    | -0.24371 | -1.11159 | 0.26754  | 0.37795  | 0.265626 | 0.375811 |
| PRND    | 0.831458 | 4.122919 | 5.32E-05 | 0.00031  | 5.03E-05 | 0.000293 |
| PROC    | -0.33837 | -1.08292 | 0.280042 | 0.391259 | 0.276807 | 0.387893 |
| PROCR   | 1.22915  | 3.362787 | 0.000911 | 0.00341  | 0.000833 | 0.003176 |
| PRODH2  | 0.1151   | 1.167751 | 0.244183 | 0.353305 | 0.252091 | 0.360678 |
| PROM1   | -3.06559 | -5.2666  | 3.33E-07 | 3.56E-06 | 2.63E-07 | 2.88E-06 |
| PROSC   | 0.468553 | 1.942382 | 0.053379 | 0.105324 | 0.052204 | 0.103265 |
| PRPF18  | -0.11119 | -0.85486 | 0.393567 | 0.509437 | 0.396304 | 0.512698 |
| PRPF3   | -0.78168 | -4.57853 | 7.87E-06 | 5.80E-05 | 7.72E-06 | 5.73E-05 |
| PRPF31  | -0.1708  | -1.16072 | 0.247026 | 0.355924 | 0.248205 | 0.357403 |
| PRPF4   | 0.258275 | 1.666076 | 0.097134 | 0.171822 | 0.097568 | 0.172324 |
| PRPF4B  | 0.440434 | 2.268142 | 0.0243   | 0.054438 | 0.023934 | 0.053874 |
| PRPF8   | 0.029469 | 0.213052 | 0.831486 | 0.878791 | 0.832161 | 0.879037 |
| PRPH    | 0.333871 | 1.536169 | 0.125947 | 0.210393 | 0.124466 | 0.208034 |
| PRPS1   | 0.297989 | 1.662489 | 0.097852 | 0.172896 | 0.097391 | 0.172081 |
| PRPS2   | -1.01485 | -4.28489 | 2.74E-05 | 0.000174 | 2.50E-05 | 0.00016  |
| PRPSAP1 | -0.12013 | -0.84578 | 0.398605 | 0.514965 | 0.400195 | 0.516593 |
| PRPSAP2 | 0.553947 | 2.715863 | 0.00714  | 0.019388 | 0.006955 | 0.01906  |
| PRR3    | -0.07869 | -0.52139 | 0.602622 | 0.701996 | 0.603326 | 0.703107 |
| PRRG1   | 1.850444 | 6.445166 | 7.31E-10 | 1.61E-08 | 5.67E-10 | 1.27E-08 |
| PRRG2   | 0.878992 | 5.059451 | 8.92E-07 | 8.75E-06 | 8.64E-07 | 8.57E-06 |
| PRRX1   | 0.119401 | 0.55984  | 0.576164 | 0.681402 | 0.574756 | 0.679585 |
| PRSS16  | 0.073352 | 0.190313 | 0.849241 | 0.890349 | 0.8481   | 0.889619 |
| PRSS21  | 3.97224  | 6.175344 | 3.19E-09 | 5.79E-08 | 2.32E-09 | 4.37E-08 |
| PRSS23  | 0.711497 | 2.617177 | 0.009487 | 0.02473  | 0.00907  | 0.023802 |
| PRSS8   | 0.137381 | 0.417528 | 0.676703 | 0.76315  | 0.674566 | 0.76131  |
| PRTFDC1 | 0.235206 | 0.70021  | 0.484543 | 0.596947 | 0.481442 | 0.594139 |
| PSAP    | 0.77961  | 4.971909 | 1.34E-06 | 1.24E-05 | 1.36E-06 | 1.26E-05 |
| PSCA    | -3.4574  | -4.70878 | 4.43E-06 | 3.52E-05 | 3.64E-06 | 2.94E-05 |
| PSD     | 0.2035   | 1.35688  | 0.176223 | 0.274891 | 0.177106 | 0.275538 |



|          |          |          |          |          |          |          |
|----------|----------|----------|----------|----------|----------|----------|
| PSD4     | -0.37383 | -2.27797 | 0.023698 | 0.053292 | 0.023712 | 0.053478 |
| PSEN1    | -0.4754  | -2.62086 | 0.009388 | 0.024514 | 0.009273 | 0.024225 |
| PSEN2    | 0.633869 | 3.610806 | 0.000379 | 0.001629 | 0.000373 | 0.001605 |
| PSIP1    | 0.233545 | 1.137924 | 0.256401 | 0.365399 | 0.254858 | 0.363972 |
| PSMA1    | -0.17836 | -1.20043 | 0.231276 | 0.338016 | 0.232333 | 0.339436 |
| PSMA2    | 0.151507 | 1.255251 | 0.210731 | 0.31603  | 0.214465 | 0.319894 |
| PSMA3    | -0.13257 | -0.89539 | 0.371566 | 0.487947 | 0.372697 | 0.489144 |
| PSMA5    | -0.10765 | -0.85975 | 0.390874 | 0.506649 | 0.394174 | 0.510222 |
| PSMA6    | -0.09069 | -0.64761 | 0.517918 | 0.629647 | 0.519483 | 0.630987 |
| PSMB1    | 0.231583 | 1.73919  | 0.083413 | 0.151017 | 0.084974 | 0.153979 |
| PSMB10   | -0.68781 | -3.824   | 0.000171 | 0.000835 | 0.000167 | 0.000822 |
| PSMB2    | -0.0119  | -0.05859 | 0.953331 | 0.969332 | 0.953187 | 0.969058 |
| PSMB3    | 0.002326 | 0.010793 | 0.991399 | 0.994998 | 0.991366 | 0.994965 |
| PSMB5    | -0.00911 | -0.06313 | 0.949723 | 0.96657  | 0.949873 | 0.96653  |
| PSMB7    | -0.41622 | -2.98428 | 0.003167 | 0.009824 | 0.003277 | 0.010103 |
| PSMB8    | 0.223779 | 1.148179 | 0.252153 | 0.361424 | 0.250929 | 0.359853 |
| PSMB9    | -0.23728 | -1.08161 | 0.280621 | 0.391835 | 0.278694 | 0.389608 |
| PSMC2    | -0.51209 | -2.47504 | 0.014084 | 0.034586 | 0.013759 | 0.033894 |
| PSMC3    | 0.152089 | 0.83846  | 0.402691 | 0.519102 | 0.401972 | 0.518131 |
| PSMC4    | -0.18815 | -1.07514 | 0.283501 | 0.394567 | 0.28304  | 0.394484 |
| PSMC5    | 0.152589 | 1.187157 | 0.236457 | 0.344391 | 0.239332 | 0.347716 |
| PSMC6    | 0.399547 | 2.85828  | 0.004672 | 0.013657 | 0.004821 | 0.013988 |
| PSMD1    | 0.425907 | 2.904969 | 0.004051 | 0.012105 | 0.00414  | 0.012347 |
| PSMD12   | 0.358977 | 2.27741  | 0.023732 | 0.053317 | 0.023857 | 0.053752 |
| PSMD13   | -0.33359 | -2.19632 | 0.029124 | 0.063137 | 0.029396 | 0.063706 |
| PSMD14   | 0.364749 | 2.774502 | 0.006008 | 0.016809 | 0.006277 | 0.017478 |
| PSMD5    | 0.003585 | 0.033609 | 0.973219 | 0.982188 | 0.973567 | 0.982134 |
| PSMD8    | -0.5502  | -3.63091 | 0.000352 | 0.001532 | 0.000359 | 0.001554 |
| PSME1    | 0.207788 | 1.585479 | 0.114307 | 0.194504 | 0.116309 | 0.19749  |
| PSME2    | -0.17251 | -1.13338 | 0.258298 | 0.367434 | 0.25912  | 0.368489 |
| PSME3    | 0.414861 | 2.490567 | 0.0135   | 0.033448 | 0.013482 | 0.033369 |
| PSMF1    | 0.557728 | 3.844742 | 0.000158 | 0.000784 | 0.000164 | 0.00081  |
| PSORS1C2 | 0.626938 | 2.800589 | 0.005559 | 0.015744 | 0.005359 | 0.015273 |
| PSPH     | 0.996615 | 2.128086 | 0.034453 | 0.072321 | 0.032992 | 0.069817 |
| PTBP1    | 0.163195 | 1.84636  | 0.066196 | 0.126163 | 0.072526 | 0.135914 |
| PTDSS1   | 0.250234 | 1.437476 | 0.152016 | 0.244182 | 0.151654 | 0.244017 |
| PTDSS2   | 0.698706 | 4.845098 | 2.40E-06 | 2.02E-05 | 2.54E-06 | 2.13E-05 |
| PTEN     | 0.156293 | 0.962965 | 0.336632 | 0.452049 | 0.336829 | 0.451668 |
| PTER     | 0.450995 | 1.497605 | 0.135682 | 0.223083 | 0.133137 | 0.219868 |
| PTGER2   | 1.821822 | 5.650434 | 4.97E-08 | 6.56E-07 | 4.00E-08 | 5.42E-07 |
| PTGER3   | 0.939147 | 4.461941 | 1.30E-05 | 9.14E-05 | 1.21E-05 | 8.59E-05 |

|        |          |          |          |          |          |          |
|--------|----------|----------|----------|----------|----------|----------|
| PTGER4 | 0.862652 | 3.080543 | 0.002332 | 0.007617 | 0.002191 | 0.007231 |
| PTGES  | -0.23523 | -0.85524 | 0.39336  | 0.509437 | 0.39054  | 0.506634 |
| PTGIR  | 0.546778 | 6.353291 | 1.21E-09 | 2.49E-08 | 2.75E-09 | 5.07E-08 |
| PTGIS  | 0.343663 | 1.298022 | 0.195651 | 0.299044 | 0.193112 | 0.296222 |
| PTGS2  | 0.037317 | 0.068318 | 0.945595 | 0.963625 | 0.94513  | 0.963164 |
| PTHLH  | 0.137543 | 0.411749 | 0.680928 | 0.767404 | 0.678794 | 0.765068 |
| PTK2   | 0.199384 | 1.006979 | 0.315061 | 0.429214 | 0.313712 | 0.427252 |
| PTK2B  | 0.351242 | 3.493254 | 0.000578 | 0.002353 | 0.000699 | 0.002771 |
| PTK6   | 0.017935 | 0.063741 | 0.949235 | 0.966412 | 0.948924 | 0.966277 |
| PTMS   | -0.12626 | -1.05976 | 0.290426 | 0.403013 | 0.294594 | 0.407621 |
| PTP4A1 | 0.438559 | 1.771262 | 0.077914 | 0.143889 | 0.076383 | 0.141617 |
| PTPLB  | 0.994537 | 5.025947 | 1.04E-06 | 1.00E-05 | 9.66E-07 | 9.30E-06 |
| PTPN1  | 0.587444 | 6.898725 | 5.61E-11 | 1.71E-09 | 1.46E-10 | 3.93E-09 |
| PTPN11 | 0.468995 | 3.079131 | 0.002343 | 0.007647 | 0.002379 | 0.007743 |
| PTPN12 | 0.273784 | 0.744173 | 0.457573 | 0.572423 | 0.454209 | 0.568971 |
| PTPN13 | -0.0197  | -0.10917 | 0.91317  | 0.940537 | 0.913046 | 0.940792 |
| PTPN14 | 1.887034 | 10.96029 | 1.50E-22 | 7.50E-20 | 1.20E-22 | 6.21E-20 |
| PTPN18 | 0.253377 | 1.777534 | 0.076875 | 0.142529 | 0.077826 | 0.143613 |
| PTPN2  | 0.14758  | 1.413587 | 0.15891  | 0.253178 | 0.164747 | 0.260448 |
| PTPN21 | 0.405821 | 2.812844 | 0.005359 | 0.015256 | 0.005488 | 0.015558 |
| PTPN22 | -0.11621 | -0.71008 | 0.478413 | 0.591411 | 0.478527 | 0.591405 |
| PTPN23 | 0.176972 | 1.749322 | 0.081643 | 0.148671 | 0.086394 | 0.155933 |
| PTPN3  | -0.06626 | -0.35377 | 0.723851 | 0.801626 | 0.72332  | 0.801415 |
| PTPN4  | 0.393074 | 2.425682 | 0.016093 | 0.03863  | 0.016128 | 0.038636 |
| PTPN7  | 0.123706 | 1.151194 | 0.250913 | 0.360199 | 0.256929 | 0.365707 |
| PTPN9  | -1.24415 | -8.08078 | 4.38E-14 | 3.38E-12 | 4.43E-14 | 3.53E-12 |
| PTPRB  | 0.701459 | 3.570453 | 0.000438 | 0.001851 | 0.000422 | 0.001784 |
| PTPRC  | -0.64248 | -4.03124 | 7.67E-05 | 0.000423 | 7.72E-05 | 0.000424 |
| PTPRE  | -0.10418 | -0.82914 | 0.407932 | 0.524276 | 0.411145 | 0.527288 |
| PTPRF  | 0.931037 | 3.387254 | 0.000837 | 0.003205 | 0.000779 | 0.00302  |
| PTPRM  | 0.496982 | 3.452943 | 0.000666 | 0.002657 | 0.000689 | 0.002742 |
| PTPRN2 | -0.28335 | -0.98309 | 0.326653 | 0.44117  | 0.323623 | 0.437832 |
| PTPRO  | -0.50541 | -1.10706 | 0.269487 | 0.380015 | 0.265591 | 0.375811 |
| PTPRR  | 0.58592  | 1.302795 | 0.194019 | 0.29742  | 0.190415 | 0.292563 |
| PTPRS  | -0.32868 | -2.27826 | 0.02368  | 0.053277 | 0.024082 | 0.054052 |
| PTPRT  | 0.327084 | 2.24444  | 0.025809 | 0.057136 | 0.0262   | 0.057893 |
| PTPRU  | 0.258796 | 1.432621 | 0.153399 | 0.24615  | 0.152788 | 0.245353 |
| PTPRZ1 | 0.026305 | 0.047669 | 0.962024 | 0.974395 | 0.961698 | 0.97434  |
| PTRF   | -0.17529 | -0.90434 | 0.366812 | 0.483188 | 0.365614 | 0.481745 |
| PTS    | -0.05278 | -0.31322 | 0.754411 | 0.82478  | 0.754345 | 0.824637 |
| PTTG1  | 0.058396 | 0.304988 | 0.760666 | 0.828535 | 0.760128 | 0.828708 |

|           |          |          |          |          |          |          |
|-----------|----------|----------|----------|----------|----------|----------|
| PTTG1IP   | 0.381525 | 2.446065 | 0.015235 | 0.036928 | 0.015346 | 0.037122 |
| PTX3      | -0.4083  | -0.81656 | 0.415073 | 0.531276 | 0.411173 | 0.527288 |
| PUM2      | 0.515573 | 3.686083 | 0.000287 | 0.001292 | 0.000301 | 0.001344 |
| PURA      | 1.793018 | 8.423136 | 4.94E-15 | 5.04E-13 | 3.75E-15 | 4.10E-13 |
| PURB      | 1.18253  | 5.280025 | 3.12E-07 | 3.36E-06 | 2.76E-07 | 3.01E-06 |
| PVRL1     | -0.05161 | -0.51692 | 0.605736 | 0.704868 | 0.611519 | 0.709489 |
| PVRL2     | 0.218785 | 1.115289 | 0.265955 | 0.376275 | 0.264679 | 0.375262 |
| PWP1      | -0.12024 | -0.90301 | 0.367515 | 0.483708 | 0.369959 | 0.485999 |
| PXK       | 0.825416 | 4.042025 | 7.35E-05 | 0.000407 | 6.95E-05 | 0.000386 |
| PXMP2     | -0.42815 | -2.07428 | 0.039227 | 0.080863 | 0.038572 | 0.079722 |
| PXMP4     | 1.543901 | 8.58094  | 1.78E-15 | 2.04E-13 | 1.52E-15 | 1.74E-13 |
| PYGB      | -0.2052  | -1.15413 | 0.249712 | 0.358804 | 0.249134 | 0.358072 |
| PYGL      | 0.532779 | 1.547344 | 0.123231 | 0.206483 | 0.120543 | 0.202847 |
| PYGM      | 1.211925 | 6.09427  | 4.93E-09 | 8.10E-08 | 4.38E-09 | 7.44E-08 |
| QARS      | 0.327252 | 2.260845 | 0.024756 | 0.055287 | 0.025159 | 0.056016 |
| QDPR      | 0.702395 | 5.719201 | 3.50E-08 | 4.79E-07 | 4.29E-08 | 5.76E-07 |
| QPCT      | 0.681833 | 1.622807 | 0.106076 | 0.183293 | 0.103326 | 0.179265 |
| RAB11A    | 0.412277 | 2.317349 | 0.021413 | 0.049052 | 0.021243 | 0.048704 |
| RAB11B    | 0.211028 | 1.711891 | 0.088339 | 0.158618 | 0.090711 | 0.16223  |
| RAB11FIP1 | 0.30363  | 1.056684 | 0.291825 | 0.404476 | 0.288812 | 0.40105  |
| RAB11FIP3 | -0.03068 | -0.1375  | 0.890762 | 0.922561 | 0.890308 | 0.921887 |
| RAB14     | 0.133053 | 0.776823 | 0.438105 | 0.554116 | 0.437841 | 0.553376 |
| RAB18     | 0.016015 | 0.109242 | 0.913111 | 0.940537 | 0.913337 | 0.940792 |
| RAB1A     | 0.046662 | 0.295859 | 0.767619 | 0.833218 | 0.767845 | 0.833457 |
| RAB20     | 0.171641 | 1.352889 | 0.177493 | 0.276139 | 0.180324 | 0.279895 |
| RAB23     | 0.274339 | 1.323321 | 0.187115 | 0.288625 | 0.185629 | 0.286898 |
| RAB26     | 0.356034 | 1.403394 | 0.161922 | 0.256561 | 0.159676 | 0.253625 |
| RAB27A    | 0.252565 | 1.08367  | 0.279708 | 0.391026 | 0.277488 | 0.3885   |
| RAB31     | 0.326216 | 1.701407 | 0.090292 | 0.161543 | 0.089527 | 0.16048  |
| RAB32     | 0.08317  | 0.507866 | 0.612061 | 0.709767 | 0.61215  | 0.70987  |
| RAB33A    | -0.24042 | -1.70818 | 0.089027 | 0.159583 | 0.090162 | 0.161371 |
| RAB36     | 0.020391 | 0.097569 | 0.922364 | 0.946118 | 0.922097 | 0.946052 |
| RAB37     | -0.33796 | -2.24534 | 0.02575  | 0.05706  | 0.026029 | 0.057652 |
| RAB38     | 0.786006 | 2.482151 | 0.013814 | 0.034035 | 0.013178 | 0.032753 |
| RAB3A     | 0.356651 | 2.772116 | 0.006051 | 0.016888 | 0.006355 | 0.017652 |
| RAB40B    | 0.346148 | 1.566584 | 0.118662 | 0.200544 | 0.117156 | 0.198355 |
| RAB4A     | 0.102304 | 0.601672 | 0.548017 | 0.656448 | 0.54784  | 0.656068 |
| RAB4B     | 0.162206 | 1.12067  | 0.263661 | 0.373819 | 0.265042 | 0.375432 |
| RAB5A     | 0.371355 | 2.808167 | 0.005435 | 0.015443 | 0.005675 | 0.01599  |
| RAB5C     | -0.0412  | -0.20916 | 0.834518 | 0.880214 | 0.834076 | 0.880077 |
| RAB6A     | 0.387068 | 2.854486 | 0.004726 | 0.013772 | 0.004911 | 0.014205 |

|          |          |          |          |          |          |          |
|----------|----------|----------|----------|----------|----------|----------|
| RAB7L1   | 1.616179 | 6.350477 | 1.23E-09 | 2.52E-08 | 9.91E-10 | 2.09E-08 |
| RAB8B    | 1.216231 | 6.181804 | 3.08E-09 | 5.63E-08 | 2.74E-09 | 5.07E-08 |
| RAB9A    | 0.13426  | 0.698981 | 0.485309 | 0.59742  | 0.484274 | 0.596404 |
| RAB9B    | -0.0791  | -0.35083 | 0.726054 | 0.803687 | 0.724927 | 0.802439 |
| RABEP1   | 0.572367 | 3.553987 | 0.000465 | 0.001948 | 0.000467 | 0.001954 |
| RABGAP1  | -0.27365 | -1.73459 | 0.084226 | 0.152313 | 0.084514 | 0.153305 |
| RABGGTA  | 0.011598 | 0.080996 | 0.935519 | 0.956192 | 0.935724 | 0.956274 |
| RABGGTB  | -0.33355 | -1.95158 | 0.052269 | 0.103437 | 0.052127 | 0.103199 |
| RABIF    | 0.185408 | 1.394743 | 0.164513 | 0.259933 | 0.166676 | 0.263143 |
| RAD1     | -0.20672 | -0.91868 | 0.35928  | 0.474731 | 0.357228 | 0.472295 |
| RAD17    | -0.18868 | -1.65818 | 0.09872  | 0.173907 | 0.102211 | 0.178156 |
| RAD21    | 0.106494 | 0.701782 | 0.483563 | 0.596365 | 0.484356 | 0.596404 |
| RAD23B   | 0.56641  | 3.278903 | 0.001213 | 0.004342 | 0.0012   | 0.00431  |
| RAD50    | 0.47822  | 2.61125  | 0.009648 | 0.025121 | 0.009519 | 0.024801 |
| RAD51    | 0.048867 | 0.337778 | 0.735855 | 0.811098 | 0.7366   | 0.811556 |
| RAD51C   | 0.118353 | 0.553925 | 0.580198 | 0.683956 | 0.578793 | 0.682984 |
| RAD51L1  | 0.485519 | 4.81008  | 2.81E-06 | 2.33E-05 | 3.89E-06 | 3.13E-05 |
| RAD51L3  | 0.599408 | 4.104257 | 5.73E-05 | 0.00033  | 5.96E-05 | 0.000338 |
| RAD54L   | 0.467783 | 2.764021 | 0.006198 | 0.017278 | 0.006172 | 0.017256 |
| RAE1     | -0.1349  | -0.86187 | 0.389704 | 0.505822 | 0.390245 | 0.506436 |
| RAF1     | 0.145954 | 1.075426 | 0.283373 | 0.394567 | 0.285568 | 0.397349 |
| RAGE     | 0.64601  | 1.868517 | 0.063032 | 0.121016 | 0.061144 | 0.117986 |
| RAI14    | 0.029321 | 0.127762 | 0.898455 | 0.9293   | 0.898004 | 0.928834 |
| RALA     | 0.565768 | 3.526397 | 0.000513 | 0.002117 | 0.000516 | 0.002133 |
| RALB     | 0.499112 | 3.21064  | 0.001524 | 0.005299 | 0.001542 | 0.005346 |
| RALBP1   | 0.874924 | 4.114706 | 5.50E-05 | 0.000319 | 5.14E-05 | 0.000299 |
| RALGDS   | -0.4445  | -2.64187 | 0.008842 | 0.023335 | 0.008816 | 0.023213 |
| RALY     | -0.26528 | -1.93601 | 0.05416  | 0.106552 | 0.055181 | 0.108423 |
| RAMP1    | -0.12486 | -0.3389  | 0.735011 | 0.810357 | 0.7331   | 0.808819 |
| RAMP2    | 1.494846 | 8.810487 | 3.96E-16 | 5.48E-14 | 3.55E-16 | 4.79E-14 |
| RAN      | -0.44234 | -3.18033 | 0.001685 | 0.005781 | 0.001752 | 0.005967 |
| RANBP1   | -0.07458 | -0.62182 | 0.534708 | 0.643844 | 0.538143 | 0.647039 |
| RANBP3   | -0.18253 | -1.75339 | 0.08094  | 0.147907 | 0.085249 | 0.154341 |
| RANGAP1  | -0.49648 | -3.00799 | 0.002939 | 0.009239 | 0.002937 | 0.00922  |
| RAP1A    | 0.281127 | 2.259727 | 0.024827 | 0.05538  | 0.025855 | 0.057346 |
| RAP1GDS1 | -1.27434 | -6.75487 | 1.28E-10 | 3.54E-09 | 1.14E-10 | 3.23E-09 |
| RAP2A    | -0.23704 | -1.37817 | 0.169562 | 0.266794 | 0.169274 | 0.266188 |
| RAPGEF1  | 0.199561 | 1.233842 | 0.21859  | 0.324707 | 0.218803 | 0.325126 |
| RAPGEF3  | 0.827001 | 6.95842  | 3.97E-11 | 1.26E-09 | 5.44E-11 | 1.68E-09 |
| RAPGEF4  | 1.834233 | 6.573861 | 3.57E-10 | 8.51E-09 | 2.76E-10 | 6.92E-09 |
| RARA     | 0.214141 | 1.654695 | 0.099425 | 0.174757 | 0.101422 | 0.177128 |

|          |          |          |          |          |          |          |
|----------|----------|----------|----------|----------|----------|----------|
| RARB     | 0.342064 | 2.547355 | 0.011543 | 0.029122 | 0.011937 | 0.02997  |
| RARG     | 0.231627 | 1.52914  | 0.127679 | 0.212799 | 0.128368 | 0.21354  |
| RARRES1  | -1.8149  | -3.45092 | 0.000671 | 0.002669 | 0.000603 | 0.002446 |
| RARRES2  | 0.627342 | 2.533961 | 0.011981 | 0.029999 | 0.011542 | 0.029166 |
| RARRES3  | -1.02699 | -3.03596 | 0.00269  | 0.00857  | 0.002505 | 0.008053 |
| RARS     | -0.25956 | -2.4266  | 0.016054 | 0.038555 | 0.017433 | 0.041133 |
| RASA1    | 0.485676 | 3.521412 | 0.000523 | 0.002153 | 0.000549 | 0.002251 |
| RASAL2   | 0.669575 | 4.278559 | 2.82E-05 | 0.000177 | 2.86E-05 | 0.00018  |
| RASD1    | 1.084877 | 3.169234 | 0.001748 | 0.005936 | 0.001618 | 0.005554 |
| RASGEF1C | 0.076132 | 0.607969 | 0.543841 | 0.652387 | 0.546648 | 0.655233 |
| RASGRP1  | -0.7832  | -2.34237 | 0.020063 | 0.046452 | 0.019196 | 0.044807 |
| RASGRP3  | 0.340144 | 2.604834 | 0.009825 | 0.025483 | 0.010233 | 0.026397 |
| RASL11A  | 0.927589 | 3.654656 | 0.000323 | 0.001425 | 0.000299 | 0.001335 |
| RASSF2   | 0.450945 | 2.165661 | 0.031422 | 0.067008 | 0.030838 | 0.066092 |
| RASSF4   | -0.0498  | -0.28276 | 0.777627 | 0.839763 | 0.777401 | 0.840094 |
| RBAK     | 0.915144 | 3.805938 | 0.000184 | 0.000885 | 0.00017  | 0.000833 |
| RBBP4    | 0.016317 | 0.080839 | 0.935644 | 0.956192 | 0.93545  | 0.956201 |
| RBBP6    | 0.430034 | 2.4881   | 0.013592 | 0.033639 | 0.013513 | 0.033395 |
| RBBP7    | 1.061185 | 6.622328 | 2.72E-10 | 6.79E-09 | 2.70E-10 | 6.85E-09 |
| RBBP8    | 0.808316 | 3.1074   | 0.002139 | 0.007068 | 0.002018 | 0.006721 |
| RBL1     | -0.22249 | -1.93919 | 0.053769 | 0.106    | 0.056174 | 0.110054 |
| RBM14    | 0.065954 | 0.557381 | 0.577839 | 0.682416 | 0.581219 | 0.684987 |
| RBM15    | -0.21289 | -1.7704  | 0.078058 | 0.144098 | 0.08053  | 0.147101 |
| RBM15B   | 0.477615 | 4.038694 | 7.45E-05 | 0.000412 | 8.54E-05 | 0.000463 |
| RBM17    | -0.12991 | -0.88709 | 0.376009 | 0.49268  | 0.37726  | 0.493493 |
| RBM3     | 0.56651  | 2.865627 | 0.004569 | 0.01343  | 0.004454 | 0.013116 |
| RBM4     | 0.226577 | 0.904772 | 0.366585 | 0.483025 | 0.364067 | 0.480246 |
| RBM6     | -0.00083 | -0.00262 | 0.997908 | 0.998969 | 0.997894 | 0.998956 |
| RBM8A    | -0.11531 | -0.63471 | 0.526281 | 0.636685 | 0.525642 | 0.636075 |
| RBM9     | 0.249496 | 1.977301 | 0.049268 | 0.098159 | 0.050783 | 0.100879 |
| RBMS1    | 0.663633 | 3.659276 | 0.000317 | 0.001404 | 0.00031  | 0.001372 |
| RBMS2    | 0.982332 | 7.526172 | 1.36E-12 | 6.15E-11 | 1.68E-12 | 7.44E-11 |
| RBMX     | -0.54067 | -3.32966 | 0.001021 | 0.003749 | 0.001023 | 0.003757 |
| RBP1     | 0.43038  | 1.657633 | 0.09883  | 0.173993 | 0.096965 | 0.171438 |
| RBP4     | 1.93468  | 4.099642 | 5.84E-05 | 0.000335 | 5.07E-05 | 0.000295 |
| RBP7     | 3.079901 | 10.22254 | 2.72E-20 | 7.53E-18 | 1.48E-20 | 4.09E-18 |
| RBPMS    | -0.29506 | -1.81386 | 0.071074 | 0.13398  | 0.071162 | 0.133968 |
| RBX1     | -0.03828 | -0.26993 | 0.78747  | 0.846869 | 0.78818  | 0.847478 |
| RCE1     | 0.011165 | 0.101868 | 0.918955 | 0.944269 | 0.91991  | 0.945251 |
| RCL1     | 0.595905 | 3.342886 | 0.000976 | 0.003617 | 0.000959 | 0.003548 |
| RCN2     | 0.348308 | 2.122781 | 0.0349   | 0.07313  | 0.034922 | 0.073242 |

|         |          |          |          |          |          |          |
|---------|----------|----------|----------|----------|----------|----------|
| RCOR1   | 0.037311 | 0.307958 | 0.758408 | 0.82761  | 0.760295 | 0.828708 |
| RCOR3   | 0.008429 | 0.045964 | 0.963381 | 0.975382 | 0.963319 | 0.975356 |
| RDBP    | 0.172071 | 1.013027 | 0.31217  | 0.426016 | 0.311958 | 0.425726 |
| RDH11   | 0.550489 | 4.18912  | 4.07E-05 | 0.000247 | 4.44E-05 | 0.000266 |
| RDH13   | 0.992948 | 3.930497 | 0.000114 | 0.000593 | 0.000104 | 0.000552 |
| RDH14   | 0.162923 | 0.991193 | 0.32269  | 0.436821 | 0.322769 | 0.436928 |
| RDH5    | 0.748371 | 4.961163 | 1.41E-06 | 1.29E-05 | 1.46E-06 | 1.33E-05 |
| RECK    | 0.662893 | 4.52273  | 1.00E-05 | 7.24E-05 | 1.05E-05 | 7.57E-05 |
| RECQL4  | 0.158065 | 1.233203 | 0.218828 | 0.324855 | 0.221693 | 0.328412 |
| RECQL5  | 0.167162 | 1.343073 | 0.180645 | 0.280116 | 0.183761 | 0.284384 |
| REG1A   | 1.126481 | 1.649011 | 0.100586 | 0.175943 | 0.097602 | 0.172324 |
| REG1B   | -2.46306 | -3.45302 | 0.000666 | 0.002657 | 0.000595 | 0.002417 |
| REL     | 0.280492 | 1.775535 | 0.077205 | 0.142915 | 0.07747  | 0.143099 |
| RELA    | -0.22835 | -1.86706 | 0.063235 | 0.121259 | 0.065271 | 0.124453 |
| RELB    | 0.220279 | 1.277942 | 0.202629 | 0.307328 | 0.202309 | 0.306233 |
| REPIN1  | -1.19391 | -5.71415 | 3.59E-08 | 4.88E-07 | 3.19E-08 | 4.38E-07 |
| REPS2   | 1.956837 | 6.170586 | 3.27E-09 | 5.89E-08 | 2.54E-09 | 4.76E-08 |
| RER1    | -0.15239 | -1.20688 | 0.228787 | 0.335594 | 0.2319   | 0.338909 |
| RERE    | 0.267746 | 1.811541 | 0.071433 | 0.134402 | 0.072098 | 0.135327 |
| RERG    | 0.036151 | 0.114203 | 0.909182 | 0.937301 | 0.908566 | 0.936665 |
| RET     | 0.501735 | 2.735073 | 0.00675  | 0.018531 | 0.00665  | 0.01834  |
| REV3L   | 1.188351 | 7.404182 | 2.84E-12 | 1.20E-10 | 2.79E-12 | 1.19E-10 |
| RFC1    | -0.00246 | -0.01669 | 0.986697 | 0.991762 | 0.98673  | 0.991795 |
| RFC3    | -0.135   | -0.55011 | 0.582808 | 0.686515 | 0.580891 | 0.684944 |
| RFC4    | 0.289546 | 1.230266 | 0.219923 | 0.326172 | 0.217752 | 0.323743 |
| RFFL    | 0.740979 | 5.619284 | 5.82E-08 | 7.58E-07 | 6.66E-08 | 8.44E-07 |
| RFPL3S  | -0.0246  | -0.18054 | 0.856899 | 0.896622 | 0.857533 | 0.897157 |
| RFX2    | 0.948369 | 5.282179 | 3.09E-07 | 3.33E-06 | 2.94E-07 | 3.17E-06 |
| RFX3    | 0.665428 | 4.572739 | 8.07E-06 | 5.94E-05 | 8.46E-06 | 6.22E-05 |
| RFX5    | 0.354327 | 2.045058 | 0.04205  | 0.085799 | 0.041877 | 0.085463 |
| RFXANK  | 0.336209 | 1.835987 | 0.067722 | 0.128551 | 0.06725  | 0.127759 |
| RFXAP   | 0.837471 | 4.274581 | 2.86E-05 | 0.00018  | 2.71E-05 | 0.000172 |
| RG9MTD2 | 1.658509 | 7.708652 | 4.46E-13 | 2.44E-11 | 3.52E-13 | 1.99E-11 |
| RG9MTD3 | 0.223834 | 1.925902 | 0.055417 | 0.108734 | 0.057747 | 0.112431 |
| RGL2    | 0.394354 | 2.264296 | 0.02454  | 0.054896 | 0.024404 | 0.054618 |
| RGN     | 1.388383 | 3.423506 | 0.000738 | 0.002898 | 0.00067  | 0.002681 |
| RGS1    | 1.203257 | 3.169675 | 0.001745 | 0.005931 | 0.001608 | 0.005525 |
| RGS10   | 0.709384 | 5.378551 | 1.93E-07 | 2.21E-06 | 2.19E-07 | 2.48E-06 |
| RGS11   | 0.279578 | 1.651456 | 0.100085 | 0.175588 | 0.099945 | 0.175276 |
| RGS12   | 0.413346 | 3.339269 | 0.000988 | 0.003652 | 0.001071 | 0.003905 |
| RGS13   | 0.012069 | 0.047567 | 0.962105 | 0.974395 | 0.961902 | 0.97434  |

|          |          |          |          |          |          |          |
|----------|----------|----------|----------|----------|----------|----------|
| RGS16    | -0.12761 | -0.4566  | 0.64841  | 0.74131  | 0.646418 | 0.740113 |
| RGS19    | 0.530159 | 2.792634 | 0.005693 | 0.016024 | 0.005582 | 0.015785 |
| RGS2     | 0.443265 | 1.312219 | 0.190826 | 0.293675 | 0.187677 | 0.289492 |
| RGS3     | 0.573206 | 3.952952 | 0.000104 | 0.00055  | 0.000109 | 0.000569 |
| RGS4     | 0.569038 | 1.667996 | 0.096752 | 0.171275 | 0.094376 | 0.167764 |
| RGS5     | 0.280941 | 0.919658 | 0.358768 | 0.474302 | 0.355592 | 0.470916 |
| RGS6     | 0.433107 | 4.875722 | 2.09E-06 | 1.79E-05 | 3.39E-06 | 2.75E-05 |
| RHBDF1   | -0.21373 | -1.75274 | 0.081053 | 0.147999 | 0.083429 | 0.151572 |
| RHEB     | 0.065363 | 0.582662 | 0.560723 | 0.667527 | 0.564992 | 0.67091  |
| RHOA     | -0.104   | -0.69857 | 0.485565 | 0.59758  | 0.486544 | 0.59847  |
| RHOC     | 0.384746 | 2.991033 | 0.0031   | 0.009662 | 0.003278 | 0.010103 |
| RHOJ     | 0.743651 | 4.058381 | 6.89E-05 | 0.000385 | 6.67E-05 | 0.000373 |
| RHOQ     | 0.784258 | 4.867305 | 2.17E-06 | 1.84E-05 | 2.17E-06 | 1.86E-05 |
| RHOT2    | 0.206138 | 1.725378 | 0.085877 | 0.154822 | 0.088552 | 0.158974 |
| RIN1     | 0.343469 | 2.37834  | 0.018254 | 0.042854 | 0.018584 | 0.043521 |
| RING1    | 0.388114 | 3.814581 | 0.000178 | 0.000863 | 0.00022  | 0.001028 |
| RIOK2    | 0.594875 | 4.05218  | 7.06E-05 | 0.000393 | 7.32E-05 | 0.000405 |
| RIPK1    | 0.040431 | 0.316479 | 0.751942 | 0.822655 | 0.753463 | 0.823936 |
| RIPK3    | 0.260747 | 1.335326 | 0.183162 | 0.283738 | 0.182018 | 0.282152 |
| RNASE1   | -0.33031 | -1.50432 | 0.133945 | 0.220815 | 0.132382 | 0.219005 |
| RNASE6   | 0.118465 | 0.508775 | 0.611424 | 0.709379 | 0.609783 | 0.707995 |
| RNASEH1  | 0.503923 | 3.429843 | 0.000722 | 0.002852 | 0.000743 | 0.002903 |
| RNASEH2A | -0.16754 | -0.85455 | 0.393741 | 0.509522 | 0.392486 | 0.508457 |
| RNASET2  | -0.8983  | -4.95192 | 1.47E-06 | 1.34E-05 | 1.40E-06 | 1.28E-05 |
| RND1     | 1.505452 | 5.576705 | 7.21E-08 | 9.11E-07 | 6.01E-08 | 7.79E-07 |
| RNF10    | -0.26399 | -1.88493 | 0.060769 | 0.117344 | 0.061714 | 0.118876 |
| RNF121   | -0.08372 | -0.56404 | 0.573306 | 0.678383 | 0.574194 | 0.679434 |
| RNF13    | 0.465383 | 3.38227  | 0.000852 | 0.003248 | 0.000893 | 0.003343 |
| RNF130   | 0.291826 | 1.912159 | 0.057167 | 0.11158  | 0.057568 | 0.11213  |
| RNF135   | 0.4484   | 2.122067 | 0.034961 | 0.073224 | 0.034303 | 0.072169 |
| RNF138   | 1.025475 | 5.10591  | 7.17E-07 | 7.18E-06 | 6.59E-07 | 6.64E-06 |
| RNF14    | 0.094835 | 0.568173 | 0.570502 | 0.675916 | 0.57046  | 0.675866 |
| RNF141   | -0.20037 | -1.41866 | 0.157427 | 0.251242 | 0.158873 | 0.252863 |
| RNF146   | -0.20083 | -1.30092 | 0.194658 | 0.298302 | 0.195288 | 0.298585 |
| RNF167   | 0.631153 | 4.862577 | 2.22E-06 | 1.88E-05 | 2.50E-06 | 2.10E-05 |
| RNF2     | 0.258124 | 1.696092 | 0.091296 | 0.163029 | 0.091844 | 0.16407  |
| RNF34    | 0.246493 | 1.183667 | 0.237834 | 0.345838 | 0.236229 | 0.344485 |
| RNF38    | 0.911632 | 5.968938 | 9.58E-09 | 1.49E-07 | 9.87E-09 | 1.56E-07 |
| RNF4     | -0.45278 | -3.47213 | 0.000623 | 0.002516 | 0.000666 | 0.002667 |
| RNF40    | 0.352653 | 2.452242 | 0.014983 | 0.03643  | 0.015279 | 0.036996 |
| RNF44    | 0.42352  | 2.440026 | 0.015485 | 0.037418 | 0.015391 | 0.037212 |

|         |          |          |          |          |          |          |
|---------|----------|----------|----------|----------|----------|----------|
| RNF6    | -0.2548  | -1.12288 | 0.262724 | 0.372715 | 0.260645 | 0.370307 |
| RNF7    | 0.393984 | 2.717796 | 0.0071   | 0.019323 | 0.007256 | 0.019734 |
| RNF8    | 0.035146 | 0.370575 | 0.711314 | 0.791847 | 0.716464 | 0.796636 |
| RNGTT   | 0.138343 | 0.935429 | 0.350602 | 0.46603  | 0.351752 | 0.46728  |
| ROBO1   | 0.216    | 0.767596 | 0.443558 | 0.558907 | 0.44077  | 0.556438 |
| ROCK1   | -0.10688 | -0.94189 | 0.347292 | 0.462806 | 0.352329 | 0.467914 |
| ROD1    | 0.372374 | 1.590175 | 0.113244 | 0.193079 | 0.111564 | 0.191004 |
| ROM1    | 0.257652 | 1.885762 | 0.060657 | 0.117223 | 0.061771 | 0.118887 |
| ROR2    | 0.494313 | 3.191782 | 0.001623 | 0.005604 | 0.001643 | 0.005634 |
| RORA    | 0.258568 | 2.057218 | 0.040855 | 0.083705 | 0.042226 | 0.085988 |
| RORC    | 0.624434 | 2.997683 | 0.003036 | 0.0095   | 0.002934 | 0.00922  |
| RP2     | 0.744352 | 5.369325 | 2.02E-07 | 2.29E-06 | 2.21E-07 | 2.50E-06 |
| RPA2    | 0.216779 | 1.202444 | 0.230496 | 0.337171 | 0.229823 | 0.336921 |
| RPA3    | 0.378768 | 2.268549 | 0.024275 | 0.054433 | 0.024245 | 0.054365 |
| RPE     | 0.736813 | 4.832298 | 2.54E-06 | 2.12E-05 | 2.61E-06 | 2.18E-05 |
| RPGR    | 0.640678 | 3.423237 | 0.000739 | 0.002898 | 0.00072  | 0.002828 |
| RPIA    | 1.015854 | 5.403961 | 1.70E-07 | 1.98E-06 | 1.59E-07 | 1.85E-06 |
| RPL10A  | -0.04006 | -0.36096 | 0.718479 | 0.797933 | 0.721529 | 0.800375 |
| RPL13A  | 0.091815 | 1.254192 | 0.211115 | 0.316505 | 0.228154 | 0.335416 |
| RPL18   | -0.25891 | -2.71928 | 0.007069 | 0.019273 | 0.008168 | 0.021726 |
| RPL27A  | -0.20808 | -0.7786  | 0.437059 | 0.55309  | 0.434419 | 0.549897 |
| RPL28   | 0.080452 | 0.593806 | 0.553257 | 0.659642 | 0.555092 | 0.661997 |
| RPL30   | 0.368987 | 4.76768  | 3.41E-06 | 2.76E-05 | 6.63E-06 | 5.05E-05 |
| RPL35   | 0.3123   | 2.577265 | 0.010618 | 0.027211 | 0.011242 | 0.028545 |
| RPL35A  | -0.11272 | -0.4857  | 0.627666 | 0.723489 | 0.626092 | 0.721765 |
| RPL36AL | -0.01881 | -0.14216 | 0.887086 | 0.919518 | 0.887681 | 0.919775 |
| RPL37   | -0.34333 | -1.50554 | 0.133633 | 0.220377 | 0.13192  | 0.218472 |
| RPL5    | 0.388928 | 3.578561 | 0.000426 | 0.001808 | 0.000496 | 0.002062 |
| RPL6    | 0.172934 | 1.789867 | 0.074863 | 0.13946  | 0.080093 | 0.146474 |
| RPL9    | 0.21137  | 2.613823 | 0.009578 | 0.024953 | 0.011803 | 0.029665 |
| RPN1    | 0.327146 | 1.902743 | 0.058392 | 0.113593 | 0.058215 | 0.113202 |
| RPS13   | 0.343799 | 3.805271 | 0.000184 | 0.000885 | 0.000249 | 0.001142 |
| RPS14   | -0.95209 | -7.73814 | 3.72E-13 | 2.07E-11 | 5.04E-13 | 2.63E-11 |
| RPS15A  | -0.45073 | -2.10392 | 0.036532 | 0.076108 | 0.035826 | 0.074837 |
| RPS16   | 0.281664 | 2.363913 | 0.018962 | 0.044338 | 0.01999  | 0.046283 |
| RPS20   | 0.349088 | 3.87681  | 0.00014  | 0.000709 | 0.000192 | 0.000916 |
| RPS21   | -0.26117 | -1.19792 | 0.23225  | 0.339104 | 0.23041  | 0.337435 |
| RPS23   | 0.321031 | 1.702692 | 0.090051 | 0.161275 | 0.089363 | 0.160308 |
| RPS24   | -0.43764 | -2.4375  | 0.01559  | 0.037596 | 0.01544  | 0.037252 |
| RPS25   | 0.160225 | 1.56853  | 0.118208 | 0.19992  | 0.123749 | 0.207277 |
| RPS27A  | -0.78762 | -3.27854 | 0.001214 | 0.004344 | 0.001147 | 0.004135 |



|         |          |          |          |          |          |          |
|---------|----------|----------|----------|----------|----------|----------|
| RPS28   | 0.278546 | 1.901722 | 0.058526 | 0.113807 | 0.059169 | 0.114678 |
| RPS3    | 0.230797 | 1.888769 | 0.06025  | 0.116558 | 0.062237 | 0.119686 |
| RPS4X   | 0.10417  | 1.084992 | 0.279124 | 0.390325 | 0.287839 | 0.400131 |
| RPS4Y1  | 2.85839  | 7.169845 | 1.15E-11 | 4.43E-10 | 7.91E-12 | 3.13E-10 |
| RPS5    | 0.294905 | 2.573294 | 0.010737 | 0.02747  | 0.011531 | 0.029152 |
| RPS6KA1 | -0.21235 | -0.85323 | 0.394466 | 0.510319 | 0.392006 | 0.507975 |
| RPS6KA3 | 0.476371 | 2.325919 | 0.020942 | 0.048224 | 0.020525 | 0.047218 |
| RPS6KA4 | 0.642223 | 8.219828 | 1.81E-14 | 1.58E-12 | 8.60E-14 | 6.01E-12 |
| RPS6KA5 | 1.165981 | 5.241786 | 3.75E-07 | 3.95E-06 | 3.33E-07 | 3.54E-06 |
| RPS6KB1 | 1.120081 | 5.919942 | 1.24E-08 | 1.86E-07 | 1.13E-08 | 1.74E-07 |
| RPS6KB2 | 0.200475 | 1.207662 | 0.228486 | 0.335379 | 0.228471 | 0.335601 |
| RPS6KC1 | 0.812986 | 4.95663  | 1.44E-06 | 1.31E-05 | 1.43E-06 | 1.31E-05 |
| RPS6KL1 | -0.41745 | -2.20707 | 0.028352 | 0.061835 | 0.028002 | 0.061072 |
| RPS9    | 0.287653 | 2.800511 | 0.005561 | 0.015744 | 0.006274 | 0.017478 |
| RQCD1   | 0.631376 | 4.13594  | 5.05E-05 | 0.000296 | 5.16E-05 | 0.000299 |
| RRAGA   | 0.238541 | 1.472601 | 0.142301 | 0.231184 | 0.142468 | 0.231455 |
| RRAGB   | 1.009756 | 4.994388 | 1.21E-06 | 1.13E-05 | 1.11E-06 | 1.06E-05 |
| RRAGD   | 1.138694 | 4.099669 | 5.84E-05 | 0.000335 | 5.26E-05 | 0.000304 |
| RRAS    | -0.04326 | -0.25156 | 0.801615 | 0.85705  | 0.801492 | 0.857113 |
| RRBP1   | -0.19728 | -1.01198 | 0.312668 | 0.426448 | 0.311419 | 0.425238 |
| RRM1    | -0.19702 | -1.13803 | 0.256358 | 0.365399 | 0.255989 | 0.364951 |
| RRM2B   | -0.1114  | -0.52766 | 0.59827  | 0.698254 | 0.596963 | 0.697264 |
| RSAD2   | 0.7844   | 2.359271 | 0.019194 | 0.044793 | 0.018357 | 0.043053 |
| RSBN1   | 0.388715 | 2.282129 | 0.023447 | 0.052828 | 0.023368 | 0.052878 |
| RSU1    | -0.05309 | -0.41161 | 0.68103  | 0.767404 | 0.682854 | 0.768906 |
| RTCD1   | 1.213905 | 7.35916  | 3.73E-12 | 1.55E-10 | 3.58E-12 | 1.50E-10 |
| RTN3    | 0.714369 | 4.675837 | 5.13E-06 | 4.01E-05 | 5.26E-06 | 4.10E-05 |
| RTN4    | 0.374694 | 2.472239 | 0.014192 | 0.034741 | 0.014357 | 0.035073 |
| RUFY1   | -0.13051 | -0.93096 | 0.352906 | 0.468018 | 0.354687 | 0.469983 |
| RUNX1   | 0.296028 | 2.75204  | 0.006421 | 0.017826 | 0.007101 | 0.019359 |
| RUNX2   | 0.732147 | 6.163156 | 3.41E-09 | 6.04E-08 | 4.44E-09 | 7.50E-08 |
| RUNX3   | -0.74439 | -3.15119 | 0.001854 | 0.00627  | 0.001762 | 0.005996 |
| RUVBL1  | -0.21689 | -1.4528  | 0.147717 | 0.238663 | 0.148584 | 0.239724 |
| RXRA    | 0.437748 | 3.351875 | 0.000946 | 0.003526 | 0.001007 | 0.003707 |
| RXRG    | -0.16    | -1.1137  | 0.266636 | 0.377013 | 0.268106 | 0.378101 |
| RYBP    | 0.599996 | 3.463416 | 0.000642 | 0.002578 | 0.000634 | 0.002554 |
| RYK     | 0.519737 | 3.180828 | 0.001682 | 0.005776 | 0.001684 | 0.005748 |
| RYR1    | -0.3958  | -1.10203 | 0.271663 | 0.382468 | 0.26813  | 0.378101 |
| RYR3    | 0.428555 | 1.751981 | 0.081183 | 0.148141 | 0.079648 | 0.145943 |
| S100A1  | 0.737788 | 4.090253 | 6.06E-05 | 0.000345 | 5.89E-05 | 0.000336 |
| S100A10 | 0.633699 | 2.874437 | 0.004448 | 0.013132 | 0.004286 | 0.012701 |

|         |          |          |          |          |          |          |
|---------|----------|----------|----------|----------|----------|----------|
| S100A11 | 0.288703 | 1.816589 | 0.070653 | 0.133362 | 0.07087  | 0.133557 |
| S100A13 | 0.052873 | 0.222691 | 0.823984 | 0.873416 | 0.823155 | 0.87289  |
| S100A2  | 0.375608 | 0.831697 | 0.40649  | 0.522709 | 0.402677 | 0.518374 |
| S100A3  | 0.430075 | 1.19836  | 0.232078 | 0.338958 | 0.22864  | 0.33565  |
| S100A8  | 0.106109 | 0.288251 | 0.773429 | 0.837584 | 0.771777 | 0.836567 |
| S100A9  | -0.27145 | -0.65291 | 0.5145   | 0.626627 | 0.511177 | 0.623549 |
| SAE1    | -0.53793 | -3.46322 | 0.000642 | 0.002578 | 0.000651 | 0.002614 |
| SAFB2   | 0.029763 | 0.27204  | 0.785849 | 0.845999 | 0.788335 | 0.847478 |
| SALL2   | 0.912037 | 4.971898 | 1.34E-06 | 1.24E-05 | 1.28E-06 | 1.19E-05 |
| SARDH   | 0.134073 | 1.585714 | 0.114254 | 0.194504 | 0.123728 | 0.207277 |
| SARS    | 0.156466 | 0.543265 | 0.587502 | 0.689826 | 0.58516  | 0.688424 |
| SART3   | -0.04167 | -0.32308 | 0.746944 | 0.819094 | 0.748422 | 0.820322 |
| SATB1   | 1.168526 | 3.908366 | 0.000124 | 0.000641 | 0.000112 | 0.000585 |
| SAV1    | 1.629713 | 7.437381 | 2.33E-12 | 1.00E-10 | 1.85E-12 | 8.14E-11 |
| SBF1    | -0.0063  | -0.03171 | 0.974736 | 0.983103 | 0.974664 | 0.983031 |
| SBNO1   | 0.233026 | 0.911544 | 0.363015 | 0.479262 | 0.360414 | 0.475962 |
| SC4MOL  | 0.469015 | 1.417255 | 0.157836 | 0.251724 | 0.154927 | 0.248018 |
| SCAMP1  | 0.02469  | 0.120395 | 0.904281 | 0.933887 | 0.903974 | 0.93357  |
| SCAMP3  | 0.350898 | 2.933181 | 0.003714 | 0.011224 | 0.004004 | 0.012018 |
| SCAND1  | 1.038721 | 6.122104 | 4.25E-09 | 7.26E-08 | 4.09E-09 | 7.09E-08 |
| SCAP    | 0.885277 | 6.097168 | 4.85E-09 | 8.06E-08 | 5.19E-09 | 8.69E-08 |
| SCARA3  | 0.215816 | 0.701344 | 0.483837 | 0.596438 | 0.480927 | 0.593737 |
| SCARB2  | 0.64813  | 3.385924 | 0.000841 | 0.003215 | 0.000816 | 0.003133 |
| SCD     | 0.171467 | 0.403543 | 0.686944 | 0.772217 | 0.68458  | 0.770112 |
| SCFD1   | 0.240729 | 1.711811 | 0.088354 | 0.158618 | 0.089491 | 0.160476 |
| SCG2    | -0.66925 | -1.43808 | 0.151847 | 0.243993 | 0.148506 | 0.23969  |
| SCGB1A1 | 0.88448  | 3.129901 | 0.001988 | 0.00665  | 0.001863 | 0.006272 |
| SCGB2A1 | -1.30898 | -2.32175 | 0.02117  | 0.04863  | 0.020082 | 0.046407 |
| SCGN    | -0.04112 | -0.09404 | 0.925167 | 0.947752 | 0.924566 | 0.947342 |
| SCMH1   | 0.308347 | 1.791918 | 0.074533 | 0.13901  | 0.074327 | 0.138681 |
| SCML1   | 1.32987  | 4.348437 | 2.10E-05 | 0.000138 | 1.85E-05 | 0.000124 |
| SCN1B   | 0.789412 | 4.585081 | 7.65E-06 | 5.65E-05 | 7.48E-06 | 5.58E-05 |
| SCN3A   | 1.286604 | 3.668414 | 0.000307 | 0.001365 | 0.000277 | 0.001251 |
| SCNN1A  | 0.503852 | 3.421258 | 0.000744 | 0.002912 | 0.000765 | 0.00297  |
| SCNN1B  | -0.05791 | -0.19373 | 0.846565 | 0.888535 | 0.845581 | 0.887898 |
| SCNN1D  | -0.19215 | -1.38161 | 0.168507 | 0.265411 | 0.170161 | 0.267298 |
| SCP2    | 0.710598 | 5.537285 | 8.79E-08 | 1.08E-06 | 1.03E-07 | 1.25E-06 |
| SCPEP1  | 0.362608 | 2.094036 | 0.037412 | 0.07777  | 0.037253 | 0.077473 |
| SCRG1   | 0.153531 | 0.345717 | 0.729889 | 0.806223 | 0.727787 | 0.804279 |
| SCUBE3  | -0.09741 | -0.71689 | 0.474211 | 0.588383 | 0.476218 | 0.589438 |
| SDAD1   | -0.07559 | -0.51773 | 0.605174 | 0.704387 | 0.60615  | 0.705349 |

|          |          |          |          |          |          |          |
|----------|----------|----------|----------|----------|----------|----------|
| SDC1     | -0.99556 | -2.8384  | 0.004962 | 0.014388 | 0.004653 | 0.013601 |
| SDC3     | 0.282186 | 1.974376 | 0.049601 | 0.098741 | 0.050317 | 0.100039 |
| SDC4     | 1.326435 | 4.620993 | 6.53E-06 | 4.94E-05 | 5.70E-06 | 4.41E-05 |
| SDCBP    | 0.581934 | 3.783805 | 0.0002   | 0.000949 | 0.000203 | 0.000961 |
| SDCBP2   | -0.40415 | -1.51747 | 0.130598 | 0.216817 | 0.128397 | 0.21354  |
| SDCCAG1  | 0.216615 | 1.408598 | 0.160379 | 0.254914 | 0.161    | 0.25547  |
| SDCCAG8  | -0.16762 | -0.82533 | 0.410086 | 0.52647  | 0.40863  | 0.524601 |
| SDHA     | 0.006763 | 0.035661 | 0.971586 | 0.980767 | 0.971524 | 0.980705 |
| SDHB     | -0.47617 | -3.93532 | 0.000112 | 0.000584 | 0.000126 | 0.000646 |
| SDHC     | -0.24021 | -1.63188 | 0.104148 | 0.180826 | 0.104998 | 0.181765 |
| SDHD     | 0.637402 | 5.908854 | 1.31E-08 | 1.96E-07 | 1.89E-08 | 2.73E-07 |
| SDPR     | 1.482174 | 6.08937  | 5.06E-09 | 8.25E-08 | 4.19E-09 | 7.19E-08 |
| SDS      | 0.497798 | 3.056553 | 0.002519 | 0.008136 | 0.002523 | 0.008104 |
| SDSL     | 0.068996 | 0.330828 | 0.741092 | 0.814394 | 0.740237 | 0.814018 |
| SEC14L2  | -0.26795 | -1.58336 | 0.11479  | 0.195193 | 0.114644 | 0.195156 |
| SEC23B   | -0.39598 | -2.23544 | 0.026402 | 0.058232 | 0.026218 | 0.057906 |
| SEC23IP  | -0.01103 | -0.06808 | 0.945787 | 0.963625 | 0.945812 | 0.96365  |
| SEC24A   | -0.52546 | -2.48717 | 0.013626 | 0.033689 | 0.013286 | 0.032988 |
| SEC24B   | 0.453324 | 3.173244 | 0.001725 | 0.005875 | 0.00178  | 0.006046 |
| SEC24D   | -1.19138 | -6.54866 | 4.11E-10 | 9.60E-09 | 3.76E-10 | 9.06E-09 |
| SEC61A1  | 0.28922  | 2.071458 | 0.039493 | 0.081304 | 0.040228 | 0.082709 |
| SEC61B   | 0.134092 | 1.102304 | 0.271545 | 0.382468 | 0.27534  | 0.386182 |
| SEC61G   | -0.04142 | -0.20917 | 0.834511 | 0.880214 | 0.834058 | 0.880077 |
| SEH1L    | 0.1951   | 0.955356 | 0.340456 | 0.455751 | 0.33892  | 0.453954 |
| SEL1L    | 1.450295 | 6.738152 | 1.41E-10 | 3.81E-09 | 1.18E-10 | 3.29E-09 |
| SELENBP1 | 0.159168 | 0.803164 | 0.422755 | 0.538468 | 0.421458 | 0.536817 |
| SELK     | 0.479589 | 3.010061 | 0.00292  | 0.009192 | 0.002937 | 0.00922  |
| SELL     | 0.765806 | 2.558745 | 0.011183 | 0.028349 | 0.010663 | 0.027341 |
| SELP     | 1.752561 | 6.094151 | 4.93E-09 | 8.10E-08 | 3.92E-09 | 6.85E-08 |
| SELPLG   | -0.05294 | -0.47683 | 0.633959 | 0.72976  | 0.637793 | 0.732558 |
| SELS     | -0.03622 | -0.19906 | 0.842402 | 0.885549 | 0.842159 | 0.885293 |
| SELT     | 0.036698 | 0.266304 | 0.790256 | 0.848961 | 0.79111  | 0.84949  |
| SEMA3A   | 0.483163 | 1.766408 | 0.078727 | 0.144934 | 0.076962 | 0.142453 |
| SEMA3F   | -0.20189 | -1.36294 | 0.174308 | 0.272538 | 0.175311 | 0.273469 |
| SEMA4D   | 0.339041 | 2.190852 | 0.029522 | 0.063749 | 0.029731 | 0.064188 |
| SEMA4F   | 0.874635 | 4.598867 | 7.20E-06 | 5.36E-05 | 6.82E-06 | 5.18E-05 |
| SEMA7A   | -0.00091 | -0.00807 | 0.993571 | 0.996115 | 0.993641 | 0.996184 |
| SEMG1    | 0.793066 | 1.488438 | 0.138081 | 0.225968 | 0.134758 | 0.22161  |
| SENP6    | 0.822257 | 4.840818 | 2.45E-06 | 2.05E-05 | 2.40E-06 | 2.03E-05 |
| SEPHS2   | 1.781154 | 8.716543 | 7.34E-16 | 8.63E-14 | 5.63E-16 | 6.78E-14 |
| SEPP1    | 0.497885 | 1.911117 | 0.057301 | 0.111749 | 0.05592  | 0.109647 |

|          |          |          |          |          |          |          |
|----------|----------|----------|----------|----------|----------|----------|
| SEPW1    | 0.092524 | 0.495712 | 0.620597 | 0.717012 | 0.619914 | 0.716752 |
| SEPX1    | -0.10727 | -0.46562 | 0.641952 | 0.736615 | 0.640452 | 0.735253 |
| SERP1    | 0.658804 | 4.925876 | 1.66E-06 | 1.47E-05 | 1.84E-06 | 1.62E-05 |
| SERPINA3 | 1.225604 | 2.381039 | 0.018124 | 0.042625 | 0.01717  | 0.040614 |
| SERPINA4 | 0.883267 | 2.172715 | 0.03088  | 0.066043 | 0.029586 | 0.064003 |
| SERPINA5 | 0.34662  | 0.826036 | 0.409687 | 0.52624  | 0.405976 | 0.521764 |
| SERPINB1 | 0.089646 | 0.339826 | 0.734315 | 0.80997  | 0.732866 | 0.808751 |
| SERPINB2 | -0.9059  | -1.40586 | 0.161188 | 0.255941 | 0.157532 | 0.251409 |
| SERPINB5 | -0.68466 | -1.75448 | 0.080754 | 0.147682 | 0.07844  | 0.144462 |
| SERPINB8 | 1.034057 | 7.924486 | 1.17E-13 | 7.39E-12 | 1.46E-13 | 9.15E-12 |
| SERPINB9 | -0.60941 | -2.42801 | 0.015993 | 0.03843  | 0.015439 | 0.037252 |
| SERPINE1 | -0.50502 | -1.26    | 0.209017 | 0.314361 | 0.205485 | 0.309942 |
| SERPING1 | 0.608145 | 2.677922 | 0.007972 | 0.021326 | 0.007698 | 0.02071  |
| SERPINH1 | 0.494222 | 2.62695  | 0.009227 | 0.024173 | 0.009075 | 0.023802 |
| SESN1    | 0.693674 | 2.204835 | 0.028511 | 0.062067 | 0.027447 | 0.060225 |
| SET      | 0.308585 | 2.183307 | 0.030081 | 0.064764 | 0.030641 | 0.065699 |
| SETBP1   | -0.33773 | -1.48349 | 0.13939  | 0.227793 | 0.137653 | 0.225549 |
| SETDB1   | -0.23464 | -2.28245 | 0.023427 | 0.052809 | 0.025492 | 0.05665  |
| SEZ6L    | -0.02125 | -0.16318 | 0.870524 | 0.905592 | 0.871264 | 0.90576  |
| SEZ6L2   | 0.778895 | 3.600561 | 0.000393 | 0.00168  | 0.000372 | 0.001605 |
| SF1      | 0.320136 | 0.996086 | 0.320312 | 0.434412 | 0.316985 | 0.430338 |
| SF3A1    | 0.223744 | 1.841727 | 0.066874 | 0.127146 | 0.06904  | 0.130684 |
| SF3A3    | 0.446559 | 3.004076 | 0.002975 | 0.009348 | 0.003035 | 0.009479 |
| SF3B1    | 0.46404  | 3.495789 | 0.000573 | 0.002334 | 0.000609 | 0.00246  |
| SF3B2    | -0.03355 | -0.32348 | 0.746643 | 0.818955 | 0.750123 | 0.82143  |
| SF3B4    | 0.548203 | 3.701094 | 0.000272 | 0.001232 | 0.00028  | 0.001257 |
| SFN      | 0.431157 | 1.133633 | 0.258194 | 0.367396 | 0.254582 | 0.363689 |
| SFPQ     | 0.20205  | 1.563264 | 0.119441 | 0.201209 | 0.121639 | 0.204399 |
| SFTPD    | 0.939152 | 3.862623 | 0.000148 | 0.000742 | 0.000137 | 0.000694 |
| SFXN1    | 0.480013 | 2.282936 | 0.023398 | 0.052769 | 0.022905 | 0.051907 |
| SFXN3    | 0.386292 | 2.106484 | 0.036306 | 0.075705 | 0.035978 | 0.075088 |
| SGCA     | -0.38251 | -1.59057 | 0.113156 | 0.193079 | 0.111389 | 0.190861 |
| SGCD     | 0.64089  | 3.291909 | 0.001161 | 0.004177 | 0.001125 | 0.004072 |
| SGCE     | -0.0165  | -0.0579  | 0.953878 | 0.969346 | 0.953592 | 0.969058 |
| SGK2     | 0.344531 | 1.235084 | 0.218129 | 0.324227 | 0.215345 | 0.321002 |
| SGOL1    | 0.422502 | 2.741466 | 0.006624 | 0.018325 | 0.006696 | 0.018425 |
| SGPL1    | -0.60932 | -2.9237  | 0.003824 | 0.011506 | 0.003701 | 0.01118  |
| SGPP2    | -0.85773 | -2.38437 | 0.017965 | 0.042303 | 0.01713  | 0.040614 |
| SGTB     | 0.361982 | 3.03955  | 0.002659 | 0.008484 | 0.002885 | 0.009101 |
| SH2D1A   | -0.19289 | -1.23325 | 0.218812 | 0.324855 | 0.219337 | 0.325507 |
| SH2D2A   | 1.164059 | 6.274427 | 1.87E-09 | 3.58E-08 | 1.70E-09 | 3.36E-08 |

|         |          |          |          |          |          |          |
|---------|----------|----------|----------|----------|----------|----------|
| SH2D3C  | 0.661187 | 3.82423  | 0.000171 | 0.000835 | 0.000169 | 0.000828 |
| SH2D4A  | 0.453195 | 2.039646 | 0.042592 | 0.086696 | 0.041732 | 0.085242 |
| SH3BGR  | -0.23776 | -0.97139 | 0.33243  | 0.4473   | 0.329983 | 0.445027 |
| SH3BP5  | 0.753097 | 3.784041 | 0.000199 | 0.000949 | 0.000191 | 0.000913 |
| SH3GLB1 | 0.218979 | 1.480381 | 0.140215 | 0.228649 | 0.141148 | 0.229708 |
| SHANK2  | 0.592789 | 3.360286 | 0.000919 | 0.003437 | 0.000905 | 0.003383 |
| SHB     | 0.161617 | 0.817403 | 0.414591 | 0.530947 | 0.4133   | 0.529294 |
| SHC1    | 0.501199 | 3.711723 | 0.000261 | 0.001193 | 0.000278 | 0.001252 |
| SHFM1   | -0.46956 | -2.66691 | 0.008229 | 0.021864 | 0.008155 | 0.021703 |
| SHMT1   | -0.03915 | -0.27312 | 0.785022 | 0.845463 | 0.785684 | 0.845982 |
| SHOX2   | -0.1379  | -0.50792 | 0.612021 | 0.709767 | 0.60993  | 0.707995 |
| SIAH2   | 0.229998 | 1.528472 | 0.127845 | 0.213    | 0.128591 | 0.213787 |
| SIGLEC5 | 0.351019 | 2.342903 | 0.020035 | 0.046423 | 0.020281 | 0.046795 |
| SILV    | 0.204749 | 1.296473 | 0.196183 | 0.299662 | 0.196602 | 0.300204 |
| SIM2    | -0.70673 | -2.61084 | 0.009659 | 0.025137 | 0.009238 | 0.024163 |
| SIP1    | 0.393535 | 2.465647 | 0.014449 | 0.035314 | 0.01451  | 0.03539  |
| SIPA1   | 0.438105 | 3.177883 | 0.001699 | 0.005798 | 0.00177  | 0.006017 |
| SIRPB1  | 0.204921 | 1.35884  | 0.175602 | 0.274104 | 0.17643  | 0.275032 |
| SIRT2   | 0.017537 | 0.148857 | 0.881804 | 0.914694 | 0.882865 | 0.915592 |
| SIRT5   | 0.277129 | 3.073048 | 0.002389 | 0.007775 | 0.002943 | 0.009234 |
| SIRT6   | 0.253125 | 2.835357 | 0.005008 | 0.014476 | 0.006033 | 0.016939 |
| SIX5    | 0.071193 | 0.571885 | 0.567989 | 0.673618 | 0.570759 | 0.676051 |
| SKI     | 0.445234 | 2.258142 | 0.024927 | 0.055577 | 0.024525 | 0.054863 |
| SKIL    | 0.083841 | 0.331098 | 0.740889 | 0.814394 | 0.739553 | 0.813456 |
| SKP2    | -0.79273 | -2.55893 | 0.011177 | 0.028349 | 0.010643 | 0.027304 |
| SLA     | -0.05023 | -0.29344 | 0.769468 | 0.834641 | 0.769343 | 0.834698 |
| SLAMF1  | -0.11157 | -0.71433 | 0.47579  | 0.589641 | 0.476316 | 0.589438 |
| SLBP    | 0.11911  | 0.615839 | 0.538643 | 0.647806 | 0.537643 | 0.646602 |
| SLC11A1 | 0.840988 | 6.533192 | 4.48E-10 | 1.03E-08 | 5.43E-10 | 1.23E-08 |
| SLC11A2 | 0.105669 | 0.447211 | 0.655167 | 0.747134 | 0.653636 | 0.745472 |
| SLC12A2 | -1.52877 | -4.23252 | 3.41E-05 | 0.000211 | 2.97E-05 | 0.000187 |
| SLC12A9 | -0.19165 | -0.95109 | 0.34261  | 0.458113 | 0.341156 | 0.456688 |
| SLC15A1 | -0.1066  | -0.42909 | 0.668281 | 0.757779 | 0.666662 | 0.755926 |
| SLC15A2 | -0.56029 | -3.10384 | 0.002163 | 0.007135 | 0.002128 | 0.007048 |
| SLC16A1 | 1.06483  | 3.345776 | 0.000966 | 0.00359  | 0.000891 | 0.00334  |
| SLC16A2 | 1.325061 | 4.144876 | 4.87E-05 | 0.000287 | 4.31E-05 | 0.000259 |
| SLC16A3 | -0.3441  | -1.16291 | 0.246139 | 0.355225 | 0.243107 | 0.351886 |
| SLC16A4 | -0.19269 | -0.51265 | 0.608716 | 0.707253 | 0.606005 | 0.705349 |
| SLC16A5 | 0.813488 | 3.08692  | 0.002285 | 0.007478 | 0.002155 | 0.007128 |
| SLC16A7 | 1.853224 | 5.893057 | 1.43E-08 | 2.10E-07 | 1.13E-08 | 1.74E-07 |
| SLC16A9 | 1.09155  | 2.412266 | 0.016681 | 0.039798 | 0.015813 | 0.038076 |

|          |          |          |          |          |          |          |
|----------|----------|----------|----------|----------|----------|----------|
| SLC17A4  | 0.327594 | 2.306098 | 0.022045 | 0.05037  | 0.022478 | 0.051185 |
| SLC18A2  | 0.64384  | 2.324268 | 0.021032 | 0.04836  | 0.020265 | 0.046782 |
| SLC19A2  | 0.551844 | 2.035201 | 0.043041 | 0.087421 | 0.041825 | 0.085395 |
| SLC1A3   | -0.4744  | -2.08672 | 0.038076 | 0.078767 | 0.037232 | 0.077465 |
| SLC1A4   | -0.24319 | -0.94783 | 0.344264 | 0.459671 | 0.341635 | 0.457065 |
| SLC1A5   | -0.78047 | -3.8053  | 0.000184 | 0.000885 | 0.000175 | 0.000853 |
| SLC20A1  | 0.18998  | 0.785774 | 0.432853 | 0.548951 | 0.430574 | 0.546604 |
| SLC22A11 | 0.24581  | 1.399351 | 0.163129 | 0.25815  | 0.162694 | 0.257376 |
| SLC22A17 | 0.570782 | 5.38381  | 1.88E-07 | 2.16E-06 | 2.62E-07 | 2.88E-06 |
| SLC22A18 | -0.88787 | -2.83666 | 0.004988 | 0.014428 | 0.0047   | 0.013713 |
| SLC23A1  | 0.011982 | 0.052246 | 0.95838  | 0.97182  | 0.958195 | 0.971651 |
| SLC24A1  | 0.22561  | 2.547888 | 0.011526 | 0.029094 | 0.013498 | 0.03339  |
| SLC25A1  | -0.19158 | -0.98386 | 0.326274 | 0.440785 | 0.325034 | 0.439361 |
| SLC25A11 | -0.06723 | -0.44349 | 0.65785  | 0.748099 | 0.65844  | 0.748753 |
| SLC25A12 | -0.2331  | -1.2907  | 0.198174 | 0.301918 | 0.197512 | 0.3013   |
| SLC25A13 | 0.100899 | 0.399066 | 0.690235 | 0.774804 | 0.688668 | 0.77323  |
| SLC25A14 | 0.51649  | 3.891777 | 0.000132 | 0.000678 | 0.000142 | 0.000718 |
| SLC25A20 | 0.778533 | 3.794233 | 0.000192 | 0.000919 | 0.000182 | 0.000883 |
| SLC25A5  | 0.136326 | 0.839251 | 0.402248 | 0.518674 | 0.402434 | 0.518203 |
| SLC26A2  | 0.508692 | 1.753394 | 0.08094  | 0.147907 | 0.079033 | 0.145214 |
| SLC26A3  | -0.02831 | -0.05574 | 0.9556   | 0.970048 | 0.955227 | 0.970225 |
| SLC29A2  | -0.12737 | -0.83532 | 0.404454 | 0.520661 | 0.405253 | 0.521119 |
| SLC2A3   | 1.403654 | 4.913923 | 1.75E-06 | 1.54E-05 | 1.51E-06 | 1.36E-05 |
| SLC2A4RG | -0.29419 | -1.90078 | 0.05865  | 0.113999 | 0.058981 | 0.114368 |
| SLC2A5   | 0.389595 | 1.992901 | 0.047519 | 0.095079 | 0.046931 | 0.094142 |
| SLC2A8   | 0.085881 | 0.556175 | 0.578661 | 0.682829 | 0.579207 | 0.683302 |
| SLC30A3  | 0.548976 | 4.458554 | 1.32E-05 | 9.26E-05 | 1.51E-05 | 0.000104 |
| SLC30A4  | 0.952694 | 8.245821 | 1.54E-14 | 1.39E-12 | 2.40E-14 | 2.05E-12 |
| SLC30A5  | -0.36428 | -2.2693  | 0.024229 | 0.054355 | 0.024304 | 0.054434 |
| SLC33A1  | 0.432949 | 2.114323 | 0.035624 | 0.074381 | 0.035026 | 0.073426 |
| SLC35A1  | 0.167937 | 0.762184 | 0.446774 | 0.561917 | 0.444933 | 0.55979  |
| SLC35A3  | 0.326364 | 1.672454 | 0.095869 | 0.170032 | 0.095001 | 0.168556 |
| SLC35B1  | 0.462327 | 2.801316 | 0.005547 | 0.015725 | 0.005545 | 0.015698 |
| SLC35B3  | 0.22239  | 1.216087 | 0.225267 | 0.332315 | 0.224494 | 0.331318 |
| SLC35B4  | 0.341662 | 1.91183  | 0.057209 | 0.111616 | 0.056875 | 0.111149 |
| SLC35C2  | -0.19667 | -1.41969 | 0.157125 | 0.250845 | 0.158779 | 0.252798 |
| SLC35D2  | -0.33082 | -2.40999 | 0.016783 | 0.039963 | 0.017237 | 0.04075  |
| SLC35E1  | 0.984134 | 7.642772 | 6.68E-13 | 3.40E-11 | 8.43E-13 | 4.08E-11 |
| SLC35F5  | -0.03981 | -0.12719 | 0.898907 | 0.929358 | 0.898228 | 0.928861 |
| SLC37A1  | 0.102313 | 0.772716 | 0.440527 | 0.556081 | 0.442934 | 0.55827  |
| SLC37A4  | 0.344398 | 1.652956 | 0.099779 | 0.175247 | 0.098614 | 0.173461 |

|          |          |          |          |          |          |          |
|----------|----------|----------|----------|----------|----------|----------|
| SLC38A2  | -0.20558 | -1.00536 | 0.315839 | 0.430149 | 0.314292 | 0.427794 |
| SLC39A1  | -0.29288 | -1.67647 | 0.09508  | 0.169014 | 0.094763 | 0.168261 |
| SLC39A11 | 0.75763  | 2.683193 | 0.007852 | 0.021051 | 0.007476 | 0.020229 |
| SLC39A6  | -0.19888 | -1.01676 | 0.310395 | 0.423962 | 0.309124 | 0.422964 |
| SLC39A8  | 0.265456 | 2.198801 | 0.028944 | 0.062863 | 0.030251 | 0.065042 |
| SLC3A1   | -0.00352 | -0.00898 | 0.992843 | 0.995809 | 0.992787 | 0.995753 |
| SLC3A2   | 0.07116  | 0.377513 | 0.70616  | 0.787414 | 0.705572 | 0.786759 |
| SLC40A1  | 0.013864 | 0.053143 | 0.957667 | 0.971516 | 0.95743  | 0.971486 |
| SLC43A1  | 1.03312  | 3.794836 | 0.000191 | 0.000918 | 0.000175 | 0.000853 |
| SLC4A2   | -0.30802 | -1.63419 | 0.103662 | 0.180182 | 0.102926 | 0.178836 |
| SLC4A3   | -0.15452 | -0.86701 | 0.386891 | 0.503735 | 0.386298 | 0.503121 |
| SLC4A4   | 1.080172 | 2.731814 | 0.006815 | 0.018656 | 0.006395 | 0.017711 |
| SLC4A7   | 0.46659  | 2.29302  | 0.0228   | 0.051694 | 0.022368 | 0.050961 |
| SLC5A1   | -0.41578 | -0.97944 | 0.328451 | 0.443215 | 0.324606 | 0.438909 |
| SLC5A6   | 0.742296 | 4.134117 | 5.08E-05 | 0.000298 | 4.94E-05 | 0.00029  |
| SLC6A1   | 0.323844 | 1.806912 | 0.072155 | 0.135326 | 0.071761 | 0.134803 |
| SLC6A2   | -0.1635  | -1.16644 | 0.244711 | 0.35378  | 0.246453 | 0.355316 |
| SLC6A5   | 0.658294 | 5.406375 | 1.68E-07 | 1.96E-06 | 2.04E-07 | 2.33E-06 |
| SLC6A6   | 0.590157 | 3.417184 | 0.000755 | 0.002944 | 0.000746 | 0.002912 |
| SLC6A8   | -0.0614  | -0.16122 | 0.872073 | 0.906158 | 0.871106 | 0.90576  |
| SLC7A1   | -0.33007 | -1.37801 | 0.169613 | 0.266794 | 0.167536 | 0.264146 |
| SLC7A5   | -1.64736 | -4.66026 | 5.50E-06 | 4.25E-05 | 4.68E-06 | 3.68E-05 |
| SLC7A8   | 0.45311  | 1.795378 | 0.073978 | 0.138195 | 0.072446 | 0.135872 |
| SLC7A9   | 0.112629 | 0.245026 | 0.806667 | 0.861471 | 0.805115 | 0.860009 |
| SLC9A3R1 | -0.09606 | -0.41118 | 0.681343 | 0.767573 | 0.679946 | 0.766183 |
| SLC9A6   | 0.425914 | 2.638922 | 0.008917 | 0.023493 | 0.008944 | 0.023522 |
| SLC9A8   | 0.672445 | 3.305723 | 0.001108 | 0.004014 | 0.001067 | 0.003895 |
| SLCO2A1  | 0.904303 | 3.033811 | 0.002708 | 0.008623 | 0.002539 | 0.00815  |
| SLCO2B1  | -0.18166 | -1.00488 | 0.316068 | 0.430212 | 0.315352 | 0.429035 |
| SLCO3A1  | 0.676856 | 2.867264 | 0.004546 | 0.013389 | 0.004355 | 0.012874 |
| SLCO4A1  | -0.60796 | -2.7951  | 0.005651 | 0.015943 | 0.005462 | 0.015512 |
| SLIT2    | 0.108045 | 0.420726 | 0.674369 | 0.761908 | 0.672694 | 0.760222 |
| SLIT3    | 0.07314  | 0.526633 | 0.598984 | 0.698914 | 0.60043  | 0.700427 |
| SLMAP    | 0.471899 | 2.052938 | 0.041273 | 0.084376 | 0.040362 | 0.082948 |
| SLPI     | 0.841409 | 1.836787 | 0.067603 | 0.128377 | 0.065385 | 0.124543 |
| SLU7     | 0.645904 | 4.907593 | 1.80E-06 | 1.58E-05 | 2.02E-06 | 1.75E-05 |
| SMAD1    | 0.580367 | 2.431525 | 0.015843 | 0.038107 | 0.015336 | 0.037117 |
| SMAD2    | 0.32458  | 2.059528 | 0.040632 | 0.08332  | 0.040816 | 0.083662 |
| SMAD3    | 0.692451 | 4.085552 | 6.18E-05 | 0.000351 | 6.11E-05 | 0.000346 |
| SMAD4    | -1.06535 | -4.34555 | 2.13E-05 | 0.000139 | 1.93E-05 | 0.000128 |
| SMAD5    | 1.321801 | 6.373534 | 1.08E-09 | 2.26E-08 | 9.37E-10 | 1.98E-08 |

|          |          |          |          |          |          |          |
|----------|----------|----------|----------|----------|----------|----------|
| SMAD6    | -0.198   | -1.80994 | 0.071683 | 0.134763 | 0.075082 | 0.139756 |
| SMAD7    | 0.228298 | 0.848544 | 0.397066 | 0.513374 | 0.394325 | 0.510277 |
| SMARCA1  | 1.320894 | 4.275451 | 2.85E-05 | 0.000179 | 2.52E-05 | 0.00016  |
| SMARCA2  | 0.423058 | 1.858249 | 0.064482 | 0.123448 | 0.063309 | 0.121449 |
| SMARCA4  | -0.14738 | -0.78797 | 0.431571 | 0.547472 | 0.430654 | 0.546604 |
| SMARCA5  | 0.341508 | 2.206856 | 0.028367 | 0.06184  | 0.028571 | 0.062197 |
| SMARCAD1 | 0.129288 | 0.907072 | 0.36537  | 0.481694 | 0.366943 | 0.482737 |
| SMARCAL1 | 0.781374 | 5.553914 | 8.09E-08 | 1.01E-06 | 8.79E-08 | 1.09E-06 |
| SMARCB1  | -0.29802 | -3.05221 | 0.002554 | 0.008233 | 0.003009 | 0.009411 |
| SMARCC1  | 0.581143 | 3.881797 | 0.000137 | 0.0007   | 0.000141 | 0.000714 |
| SMARCD1  | 0.254144 | 2.163214 | 0.031613 | 0.067322 | 0.033169 | 0.070127 |
| SMARCD2  | 0.384035 | 2.239292 | 0.026147 | 0.057749 | 0.026044 | 0.057658 |
| SMARCD3  | 0.417363 | 3.413699 | 0.000764 | 0.002968 | 0.000835 | 0.003179 |
| SMG1     | 1.127694 | 7.273217 | 6.23E-12 | 2.50E-10 | 6.32E-12 | 2.56E-10 |
| SMNDC1   | 0.460691 | 3.407079 | 0.000782 | 0.003012 | 0.000824 | 0.003152 |
| SMO      | 0.378048 | 3.430878 | 0.00072  | 0.002844 | 0.000824 | 0.003152 |
| SMOC2    | 1.347536 | 5.017911 | 1.08E-06 | 1.03E-05 | 9.34E-07 | 9.11E-06 |
| SMPD1    | 0.984531 | 6.020635 | 7.29E-09 | 1.16E-07 | 7.19E-09 | 1.15E-07 |
| SMTN     | -0.70505 | -3.42828 | 0.000726 | 0.002863 | 0.000696 | 0.002764 |
| SMU1     | 0.498455 | 2.899605 | 0.004119 | 0.012275 | 0.004089 | 0.012226 |
| SMUG1    | 1.043451 | 4.389069 | 1.77E-05 | 0.00012  | 1.61E-05 | 0.00011  |
| SMYD2    | -0.11205 | -0.727   | 0.468008 | 0.583121 | 0.468664 | 0.583477 |
| SMYD5    | 0.248682 | 1.929382 | 0.054982 | 0.108032 | 0.056441 | 0.110484 |
| SNAP25   | 0.257751 | 0.613478 | 0.5402   | 0.649179 | 0.536985 | 0.646    |
| SNAP29   | 0.02008  | 0.08575  | 0.931744 | 0.95345  | 0.931426 | 0.953125 |
| SNAPC4   | 0.209345 | 1.744894 | 0.082412 | 0.149725 | 0.084983 | 0.153979 |
| SNCA     | 0.840611 | 3.003215 | 0.002983 | 0.009367 | 0.002811 | 0.008902 |
| SNCAIP   | 0.351271 | 0.995997 | 0.320356 | 0.434412 | 0.316822 | 0.430241 |
| SNCG     | 0.934213 | 7.786527 | 2.76E-13 | 1.60E-11 | 3.90E-13 | 2.18E-11 |
| SND1     | -0.31328 | -2.33536 | 0.020433 | 0.047215 | 0.021037 | 0.048254 |
| SNN      | 0.193155 | 1.294333 | 0.19692  | 0.300397 | 0.197888 | 0.301775 |
| SNRPA    | 0.031033 | 0.265575 | 0.790817 | 0.84937  | 0.792725 | 0.850836 |
| SNRPA1   | -0.01573 | -0.08823 | 0.929773 | 0.952055 | 0.929686 | 0.951966 |
| SNRPB    | -0.09971 | -0.64322 | 0.520758 | 0.632281 | 0.521321 | 0.631986 |
| SNRPB2   | 0.00895  | 0.073568 | 0.941422 | 0.960426 | 0.941885 | 0.960899 |
| SNRPC    | 0.270114 | 2.491225 | 0.013476 | 0.033406 | 0.014633 | 0.035654 |
| SNRPD2   | -0.04597 | -0.34289 | 0.732014 | 0.80819  | 0.733282 | 0.80883  |
| SNRPD3   | 0.24552  | 1.64308  | 0.101808 | 0.177484 | 0.102529 | 0.178543 |
| SNRPE    | -0.53877 | -1.97858 | 0.049122 | 0.097953 | 0.047794 | 0.095588 |
| SNRPF    | -0.17913 | -1.1197  | 0.264072 | 0.374175 | 0.264399 | 0.374977 |
| SNRPG    | 0.093203 | 0.79877  | 0.425293 | 0.541115 | 0.429642 | 0.545614 |



|         |          |          |          |          |          |          |
|---------|----------|----------|----------|----------|----------|----------|
| SNRPN   | -0.38978 | -3.95227 | 0.000105 | 0.000551 | 0.000134 | 0.000683 |
| SNTA1   | -0.10268 | -0.66171 | 0.508853 | 0.621228 | 0.509417 | 0.621724 |
| SNTB1   | -0.88117 | -3.71434 | 0.000259 | 0.001185 | 0.000241 | 0.001117 |
| SNTB2   | 0.268083 | 1.983462 | 0.048571 | 0.096977 | 0.049609 | 0.09884  |
| SNX1    | 0.422344 | 3.258879 | 0.001298 | 0.004609 | 0.001381 | 0.004879 |
| SNX15   | 0.17563  | 1.206887 | 0.228784 | 0.335594 | 0.230066 | 0.337067 |
| SOCS1   | 0.236884 | 2.131994 | 0.034126 | 0.071861 | 0.036159 | 0.075431 |
| SOCS2   | 0.965919 | 3.196305 | 0.001599 | 0.005537 | 0.001488 | 0.00521  |
| SOCS3   | 0.360279 | 1.955609 | 0.051789 | 0.102611 | 0.051364 | 0.101947 |
| SOCS6   | 1.225257 | 4.357798 | 2.02E-05 | 0.000133 | 1.80E-05 | 0.000121 |
| SOD1    | 0.144984 | 0.871894 | 0.384225 | 0.501488 | 0.384202 | 0.501196 |
| SOD3    | -0.09154 | -0.3686  | 0.712787 | 0.79311  | 0.711363 | 0.791901 |
| SORCS2  | -0.23655 | -1.16512 | 0.245245 | 0.354226 | 0.243776 | 0.352647 |
| SORL1   | -1.10615 | -3.51777 | 0.00053  | 0.002173 | 0.000485 | 0.002019 |
| SORT1   | 0.338461 | 1.611986 | 0.108412 | 0.186574 | 0.107167 | 0.18477  |
| SOS1    | -0.23969 | -1.06043 | 0.29012  | 0.402707 | 0.288038 | 0.40029  |
| SOX10   | 0.26139  | 2.245765 | 0.025722 | 0.057039 | 0.027126 | 0.059632 |
| SOX13   | 0.307848 | 1.467189 | 0.143766 | 0.233    | 0.142357 | 0.231436 |
| SOX30   | -0.26171 | -0.88158 | 0.378975 | 0.495769 | 0.375902 | 0.491991 |
| SOX5    | 0.324581 | 1.988909 | 0.047962 | 0.095849 | 0.048014 | 0.095947 |
| SOX8    | -2.14248 | -4.68836 | 4.85E-06 | 3.81E-05 | 4.05E-06 | 3.24E-05 |
| SOX9    | 0.15274  | 0.442423 | 0.658621 | 0.748432 | 0.656311 | 0.747434 |
| SP1     | 0.762753 | 4.948259 | 1.50E-06 | 1.35E-05 | 1.53E-06 | 1.38E-05 |
| SP100   | 0.476174 | 2.488625 | 0.013572 | 0.033609 | 0.013348 | 0.03309  |
| SP110   | 0.423735 | 2.775627 | 0.005988 | 0.016773 | 0.006064 | 0.017006 |
| SP140   | -0.55486 | -4.7868  | 3.13E-06 | 2.55E-05 | 3.81E-06 | 3.06E-05 |
| SP2     | 0.130786 | 1.070817 | 0.285436 | 0.396908 | 0.289184 | 0.401407 |
| SP3     | 0.054693 | 0.321633 | 0.748039 | 0.819912 | 0.747932 | 0.820322 |
| SPA17   | 0.089878 | 0.360314 | 0.718961 | 0.79828  | 0.717556 | 0.797284 |
| SPAG1   | 0.220101 | 0.621681 | 0.534801 | 0.643844 | 0.531807 | 0.640895 |
| SPAG5   | 0.154661 | 0.684261 | 0.494537 | 0.606556 | 0.492674 | 0.604587 |
| SPAG7   | 0.310355 | 2.692942 | 0.007633 | 0.020547 | 0.008232 | 0.02187  |
| SPAG9   | 0.98529  | 4.471301 | 1.25E-05 | 8.82E-05 | 1.15E-05 | 8.25E-05 |
| SPARC   | 0.202683 | 1.195004 | 0.233384 | 0.340654 | 0.233187 | 0.340472 |
| SPARCL1 | 0.872318 | 4.79323  | 3.04E-06 | 2.49E-05 | 2.90E-06 | 2.39E-05 |
| SPATA2  | 0.438787 | 2.562235 | 0.011074 | 0.02818  | 0.011019 | 0.028039 |
| SPDEF   | 0.251501 | 1.438943 | 0.151601 | 0.243681 | 0.151211 | 0.243388 |
| SPG20   | 0.946692 | 6.763821 | 1.22E-10 | 3.39E-09 | 1.36E-10 | 3.73E-09 |
| SPG7    | -0.29313 | -1.65853 | 0.098649 | 0.173847 | 0.098262 | 0.173124 |
| SPHK1   | -0.3071  | -1.21726 | 0.224821 | 0.332073 | 0.222358 | 0.329057 |
| SPIB    | -0.9163  | -2.64229 | 0.008832 | 0.02332  | 0.00835  | 0.022165 |

|        |          |          |          |          |          |          |
|--------|----------|----------|----------|----------|----------|----------|
| SPINK1 | 0.233277 | 0.405993 | 0.685146 | 0.770933 | 0.682574 | 0.768775 |
| SPINT1 | 0.151072 | 0.76498  | 0.445111 | 0.560413 | 0.44386  | 0.559024 |
| SPINT2 | 0.028454 | 0.117781 | 0.90635  | 0.935335 | 0.905888 | 0.934931 |
| SPIRE2 | 0.164422 | 0.805615 | 0.421343 | 0.537106 | 0.41987  | 0.535084 |
| SPON1  | 1.262842 | 3.823657 | 0.000172 | 0.000835 | 0.000154 | 0.000769 |
| SPOP   | 1.35094  | 7.679834 | 5.32E-13 | 2.78E-11 | 4.80E-13 | 2.53E-11 |
| SPRED2 | 0.019261 | 0.145837 | 0.884185 | 0.916759 | 0.8848   | 0.917397 |
| SPRR1B | -3.25811 | -5.55044 | 8.23E-08 | 1.02E-06 | 6.35E-08 | 8.13E-07 |
| SPRY1  | 0.497206 | 2.422574 | 0.016228 | 0.038894 | 0.015878 | 0.038171 |
| SPRY2  | -0.71391 | -2.31813 | 0.021369 | 0.049017 | 0.020514 | 0.047215 |
| SPTA1  | -0.34181 | -3.30387 | 0.001115 | 0.004031 | 0.001305 | 0.004638 |
| SPTB   | 0.507253 | 5.989719 | 8.58E-09 | 1.34E-07 | 1.87E-08 | 2.71E-07 |
| SPTBN1 | 0.377819 | 1.973112 | 0.049746 | 0.098945 | 0.049205 | 0.098159 |
| SPTBN5 | -0.02842 | -0.17501 | 0.861233 | 0.89951  | 0.86129  | 0.899636 |
| SPTLC1 | -0.13293 | -0.7664  | 0.444266 | 0.559649 | 0.443904 | 0.559024 |
| SQSTM1 | 0.660753 | 4.495071 | 1.13E-05 | 8.07E-05 | 1.18E-05 | 8.43E-05 |
| SRC    | 0.433787 | 3.830424 | 0.000167 | 0.000819 | 0.000194 | 0.000924 |
| SRCAP  | 0.692793 | 6.435541 | 7.71E-10 | 1.68E-08 | 1.17E-09 | 2.41E-08 |
| SRD5A1 | -1.12815 | -3.77912 | 0.000203 | 0.000964 | 0.000184 | 0.000891 |
| SREBF1 | 0.096728 | 0.678331 | 0.498281 | 0.61083  | 0.499689 | 0.611917 |
| SREBF2 | -0.86121 | -5.33844 | 2.35E-07 | 2.62E-06 | 2.35E-07 | 2.63E-06 |
| SRF    | 0.381748 | 2.817883 | 0.005279 | 0.015118 | 0.005482 | 0.015548 |
| SRI    | 0.137849 | 0.566946 | 0.571334 | 0.676732 | 0.569409 | 0.674961 |
| SRM    | -0.01972 | -0.10378 | 0.917437 | 0.943135 | 0.917255 | 0.943082 |
| SRP14  | 0.13675  | 1.439761 | 0.15137  | 0.243393 | 0.159063 | 0.252993 |
| SRP54  | -0.066   | -0.38912 | 0.697565 | 0.780608 | 0.697451 | 0.780481 |
| SRP68  | -0.10468 | -0.71273 | 0.476773 | 0.589772 | 0.4779   | 0.591243 |
| SRP72  | 0.435332 | 2.824603 | 0.005173 | 0.014861 | 0.005231 | 0.014974 |
| SRPK1  | 0.137817 | 1.014633 | 0.311406 | 0.42522  | 0.313602 | 0.427226 |
| SRPR   | 0.871841 | 5.490874 | 1.11E-07 | 1.33E-06 | 1.12E-07 | 1.35E-06 |
| SRPX   | 1.39104  | 4.047249 | 7.20E-05 | 0.000399 | 6.37E-05 | 0.000357 |
| SRPX2  | -0.0447  | -0.29743 | 0.766424 | 0.832685 | 0.766886 | 0.832994 |
| SRRM1  | 0.621881 | 5.608309 | 6.15E-08 | 7.99E-07 | 8.33E-08 | 1.03E-06 |
| SS18   | -0.14793 | -0.64835 | 0.517439 | 0.629391 | 0.515593 | 0.627572 |
| SSB    | 0.48157  | 3.778121 | 0.000204 | 0.000966 | 0.000222 | 0.001038 |
| SSBP2  | 0.589921 | 4.181629 | 4.19E-05 | 0.000253 | 4.43E-05 | 0.000265 |
| SSBP3  | -0.22315 | -1.10402 | 0.270801 | 0.381638 | 0.269337 | 0.379461 |
| SSFA2  | 0.281295 | 0.84315  | 0.400069 | 0.516431 | 0.396741 | 0.513122 |
| SSNA1  | 0.056716 | 0.331349 | 0.740699 | 0.814394 | 0.74056  | 0.814183 |
| SSPN   | 1.199173 | 4.880996 | 2.04E-06 | 1.76E-05 | 1.80E-06 | 1.59E-05 |
| SSR1   | 0.037821 | 0.209605 | 0.834172 | 0.880214 | 0.833937 | 0.880077 |

|        |          |          |          |          |          |          |
|--------|----------|----------|----------|----------|----------|----------|
| SSR2   | 0.097914 | 0.740479 | 0.459806 | 0.57491  | 0.462187 | 0.577167 |
| SSR3   | 0.278207 | 1.480503 | 0.140183 | 0.228649 | 0.139357 | 0.22766  |
| SSR4   | -0.02233 | -0.12732 | 0.898806 | 0.929358 | 0.898708 | 0.928974 |
| SSSCA1 | 0.02582  | 0.162045 | 0.87142  | 0.905922 | 0.871521 | 0.905827 |
| SST    | -1.11174 | -1.62331 | 0.105967 | 0.183173 | 0.102903 | 0.178836 |
| ST13   | 0.348823 | 2.054282 | 0.041141 | 0.084181 | 0.041041 | 0.083975 |
| ST5    | -0.05749 | -0.31056 | 0.75643  | 0.826028 | 0.755999 | 0.825748 |
| ST7    | 0.575985 | 2.857657 | 0.004681 | 0.013673 | 0.004554 | 0.013351 |
| ST7L   | 0.795534 | 4.941664 | 1.54E-06 | 1.39E-05 | 1.55E-06 | 1.39E-05 |
| STAG2  | 0.732087 | 3.994754 | 8.86E-05 | 0.000477 | 8.58E-05 | 0.000465 |
| STAM   | 0.412313 | 1.995621 | 0.04722  | 0.094561 | 0.04648  | 0.093437 |
| STAM2  | 0.592422 | 3.364963 | 0.000904 | 0.003387 | 0.000891 | 0.00334  |
| STAMPB | 0.670188 | 3.532538 | 0.000502 | 0.002086 | 0.000487 | 0.002027 |
| STAP2  | 0.194292 | 0.739908 | 0.460152 | 0.57519  | 0.457626 | 0.57249  |
| STARD3 | 0.547705 | 1.843288 | 0.066645 | 0.126916 | 0.064898 | 0.123964 |
| STARD7 | 0.275725 | 2.474519 | 0.014104 | 0.034603 | 0.015187 | 0.036832 |
| STAT1  | -0.37239 | -1.76867 | 0.078348 | 0.144462 | 0.077286 | 0.142896 |
| STAT2  | -0.54871 | -3.67958 | 0.000294 | 0.001317 | 0.000302 | 0.001345 |
| STAT3  | 0.497625 | 2.551643 | 0.011406 | 0.028823 | 0.011188 | 0.02844  |
| STAT4  | -0.12218 | -0.62755 | 0.530956 | 0.6406   | 0.529906 | 0.639038 |
| STAT5B | 0.382935 | 2.250119 | 0.02544  | 0.05656  | 0.025359 | 0.056379 |
| STAU2  | 0.785462 | 3.358502 | 0.000925 | 0.003455 | 0.000874 | 0.003291 |
| STIM1  | 0.135742 | 0.938616 | 0.348967 | 0.464498 | 0.350374 | 0.466108 |
| STIP1  | 0.254847 | 1.533354 | 0.126639 | 0.211289 | 0.126611 | 0.211224 |
| STK10  | 0.692607 | 4.899229 | 1.88E-06 | 1.63E-05 | 2.01E-06 | 1.74E-05 |
| STK16  | 0.086835 | 0.706452 | 0.480662 | 0.593565 | 0.483985 | 0.596295 |
| STK17A | 0.306178 | 1.559122 | 0.120418 | 0.202576 | 0.119418 | 0.201387 |
| STK17B | -0.04352 | -0.23441 | 0.814889 | 0.867099 | 0.814548 | 0.866933 |
| STK19  | 0.327381 | 2.559008 | 0.011175 | 0.028349 | 0.011676 | 0.02941  |
| STK24  | -0.31348 | -1.74394 | 0.082579 | 0.149912 | 0.082142 | 0.149522 |
| STK25  | 0.465199 | 2.70121  | 0.007452 | 0.020152 | 0.007404 | 0.020058 |
| STK3   | 0.538827 | 3.558328 | 0.000458 | 0.001922 | 0.000467 | 0.001954 |
| STK32B | 0.532217 | 2.534748 | 0.011954 | 0.029966 | 0.011652 | 0.029364 |
| STK33  | 0.415527 | 2.219627 | 0.027474 | 0.060228 | 0.027154 | 0.059666 |
| STK35  | 0.123855 | 0.989794 | 0.323372 | 0.437492 | 0.326751 | 0.441428 |
| STK38  | -0.09599 | -0.46719 | 0.640829 | 0.735685 | 0.639744 | 0.73462  |
| STK38L | 0.227393 | 0.888081 | 0.375476 | 0.492119 | 0.372882 | 0.489144 |
| STK39  | 0.084953 | 0.318719 | 0.750245 | 0.821755 | 0.748858 | 0.820427 |
| STK4   | 0.267655 | 1.243065 | 0.215179 | 0.320959 | 0.213434 | 0.318659 |
| STMN2  | -1.52078 | -3.609   | 0.000381 | 0.001637 | 0.000342 | 0.001494 |
| STOM   | 0.736638 | 3.371388 | 0.000885 | 0.003336 | 0.000842 | 0.003201 |

|          |          |          |          |          |          |          |
|----------|----------|----------|----------|----------|----------|----------|
| STOML1   | 0.474609 | 3.19091  | 0.001627 | 0.005611 | 0.001663 | 0.005693 |
| STRA13   | 0.079959 | 0.458759 | 0.646864 | 0.74056  | 0.646578 | 0.740116 |
| STRAP    | -0.22442 | -1.37132 | 0.171687 | 0.269335 | 0.171784 | 0.269308 |
| STRN3    | 1.076021 | 4.99393  | 1.21E-06 | 1.13E-05 | 1.10E-06 | 1.04E-05 |
| STS      | 0.492623 | 1.88271  | 0.061072 | 0.117879 | 0.059628 | 0.115472 |
| STUB1    | -0.00742 | -0.05379 | 0.957153 | 0.971414 | 0.957331 | 0.971486 |
| STX11    | 0.474444 | 2.969695 | 0.003315 | 0.010212 | 0.003332 | 0.010255 |
| STX16    | -0.30104 | -1.65753 | 0.098852 | 0.173993 | 0.098318 | 0.173135 |
| STX1A    | 0.54481  | 2.484559 | 0.013724 | 0.033877 | 0.013344 | 0.03309  |
| STX6     | 0.712032 | 5.640049 | 5.24E-08 | 6.88E-07 | 6.23E-08 | 8.01E-07 |
| STX7     | -0.00219 | -0.01498 | 0.988062 | 0.992921 | 0.988094 | 0.992953 |
| STX8     | 0.293453 | 3.142409 | 0.001908 | 0.006425 | 0.002323 | 0.007591 |
| STXBP1   | 0.971374 | 2.816631 | 0.005298 | 0.015145 | 0.004976 | 0.01435  |
| STXBP2   | -0.16435 | -1.32397 | 0.186901 | 0.288452 | 0.190089 | 0.292253 |
| STXBP3   | 0.612643 | 5.172066 | 5.24E-07 | 5.36E-06 | 6.42E-07 | 6.49E-06 |
| SUCLA2   | -0.28953 | -1.50036 | 0.134969 | 0.222268 | 0.13401  | 0.220998 |
| SUCLG1   | 0.309476 | 2.068326 | 0.039789 | 0.081771 | 0.040193 | 0.082674 |
| SUGT1    | 0.581324 | 3.379823 | 0.000859 | 0.00327  | 0.000851 | 0.003226 |
| SULT1A1  | 0.743703 | 2.589749 | 0.010252 | 0.02646  | 0.009783 | 0.02539  |
| SULT1E1  | -2.58293 | -4.11267 | 5.54E-05 | 0.000321 | 4.76E-05 | 0.000282 |
| SULT2B1  | -0.32661 | -1.30919 | 0.191848 | 0.294821 | 0.189529 | 0.291583 |
| SUMO1    | 0.059339 | 0.483617 | 0.629143 | 0.724571 | 0.631761 | 0.72749  |
| SUMO2    | 0.685059 | 7.46593  | 1.96E-12 | 8.53E-11 | 4.70E-12 | 1.94E-10 |
| SUMO3    | 0.352944 | 2.171222 | 0.030994 | 0.066245 | 0.031044 | 0.066411 |
| SUOX     | 0.489537 | 2.73455  | 0.00676  | 0.018533 | 0.006681 | 0.018396 |
| SUPT16H  | 0.447591 | 3.144286 | 0.001897 | 0.006391 | 0.001959 | 0.006551 |
| SUPT3H   | 0.083804 | 0.419109 | 0.675549 | 0.762324 | 0.67466  | 0.76131  |
| SUPT4H1  | 0.265537 | 1.608643 | 0.109142 | 0.187693 | 0.109159 | 0.187792 |
| SUPT6H   | 0.335988 | 2.32601  | 0.020937 | 0.048224 | 0.021301 | 0.048765 |
| SUPV3L1  | -0.17547 | -1.02837 | 0.304914 | 0.418545 | 0.304663 | 0.418077 |
| SURF1    | -0.221   | -1.60654 | 0.109603 | 0.188349 | 0.111079 | 0.190468 |
| SURF2    | 0.237484 | 1.597263 | 0.111655 | 0.191107 | 0.112452 | 0.192121 |
| SUV420H1 | 0.518755 | 2.177519 | 0.030515 | 0.065519 | 0.029715 | 0.064181 |
| SVIL     | -0.67587 | -2.98586 | 0.003151 | 0.009782 | 0.00302  | 0.009438 |
| SWAP70   | 0.356372 | 1.778693 | 0.076684 | 0.142287 | 0.07581  | 0.140778 |
| SYAP1    | -0.39169 | -2.17867 | 0.030428 | 0.065362 | 0.030187 | 0.064932 |
| SYCP2    | -0.10077 | -0.51247 | 0.60884  | 0.707253 | 0.607877 | 0.706659 |
| SYK      | -0.50559 | -2.56739 | 0.010916 | 0.027798 | 0.010695 | 0.027392 |
| SYN1     | -0.20655 | -1.7299  | 0.085063 | 0.153473 | 0.087732 | 0.157872 |
| SYN2     | -0.13197 | -1.02644 | 0.30582  | 0.419421 | 0.308785 | 0.422624 |
| SYN3     | 0.725126 | 5.294914 | 2.90E-07 | 3.15E-06 | 3.20E-07 | 3.42E-06 |

|         |          |          |          |          |          |          |
|---------|----------|----------|----------|----------|----------|----------|
| SYNE1   | 0.18473  | 1.205599 | 0.229279 | 0.335764 | 0.230013 | 0.337067 |
| SYNE2   | 0.252381 | 1.462301 | 0.145099 | 0.234917 | 0.144801 | 0.234731 |
| SYNGR1  | 0.145806 | 0.91126  | 0.363165 | 0.479325 | 0.363496 | 0.479627 |
| SYNGR3  | -0.51067 | -1.12963 | 0.259874 | 0.36934  | 0.256009 | 0.364951 |
| SYNGR4  | -0.67077 | -4.76063 | 3.52E-06 | 2.83E-05 | 3.76E-06 | 3.04E-05 |
| SYNJ1   | 0.245191 | 1.627004 | 0.105181 | 0.182215 | 0.105847 | 0.1831   |
| SYNJ2BP | 0.359329 | 1.947628 | 0.052743 | 0.104333 | 0.052309 | 0.103429 |
| SYNPO   | 0.139984 | 0.972512 | 0.331874 | 0.446808 | 0.333341 | 0.448269 |
| SYP     | 0.031643 | 0.19105  | 0.848664 | 0.889942 | 0.84867  | 0.889949 |
| SYT1    | 0.449639 | 0.974608 | 0.330835 | 0.445665 | 0.326884 | 0.441481 |
| SYT13   | -0.06188 | -0.12539 | 0.900331 | 0.930216 | 0.899502 | 0.92936  |
| SYT7    | -0.22947 | -2.31355 | 0.021624 | 0.049458 | 0.023819 | 0.053692 |
| SYTL1   | -1.44894 | -4.27577 | 2.85E-05 | 0.000179 | 2.49E-05 | 0.00016  |
| SYTL2   | 1.038895 | 3.934758 | 0.000112 | 0.000584 | 0.000102 | 0.000541 |
| TACC1   | 0.376399 | 1.837802 | 0.067452 | 0.128195 | 0.066565 | 0.12656  |
| TACR2   | -0.24765 | -0.86594 | 0.387477 | 0.503827 | 0.384525 | 0.501462 |
| TAF1    | 0.93945  | 6.087472 | 5.11E-09 | 8.31E-08 | 5.23E-09 | 8.70E-08 |
| TAF10   | 0.49279  | 3.720958 | 0.000253 | 0.001159 | 0.000271 | 0.00123  |
| TAF11   | 0.25533  | 1.508536 | 0.132865 | 0.219823 | 0.13271  | 0.219471 |
| TAF15   | -0.42294 | -2.0051  | 0.046189 | 0.092893 | 0.045407 | 0.091554 |
| TAF1A   | 0.524515 | 2.05339  | 0.041228 | 0.084323 | 0.040134 | 0.082588 |
| TAF1B   | 1.156405 | 6.741035 | 1.39E-10 | 3.77E-09 | 1.31E-10 | 3.62E-09 |
| TAF1C   | 0.182344 | 1.597721 | 0.111554 | 0.191025 | 0.115219 | 0.195922 |
| TAF2    | 0.636543 | 3.786692 | 0.000197 | 0.000941 | 0.000196 | 0.00093  |
| TAF5    | 0.603391 | 3.128243 | 0.001999 | 0.006681 | 0.001946 | 0.006518 |
| TAF5L   | 0.222765 | 1.578813 | 0.115829 | 0.196675 | 0.117103 | 0.198337 |
| TAF6L   | -0.14361 | -1.21013 | 0.227539 | 0.334406 | 0.23162  | 0.338605 |
| TAF7    | 0.002252 | 0.009351 | 0.992548 | 0.995726 | 0.992511 | 0.995689 |
| TAGLN   | 0.066761 | 0.329609 | 0.742012 | 0.815207 | 0.741248 | 0.814558 |
| TAGLN2  | 0.439617 | 2.494897 | 0.013341 | 0.033124 | 0.013234 | 0.032875 |
| TALDO1  | 0.231897 | 1.22983  | 0.220086 | 0.326311 | 0.219108 | 0.32527  |
| TANK    | 0.459412 | 2.62587  | 0.009255 | 0.024234 | 0.009181 | 0.02404  |
| TAOK1   | 0.767381 | 5.442972 | 1.41E-07 | 1.65E-06 | 1.52E-07 | 1.78E-06 |
| TAOK2   | 0.362303 | 2.589923 | 0.010247 | 0.02646  | 0.010522 | 0.027053 |
| TAP1    | -0.09559 | -0.51196 | 0.609201 | 0.707498 | 0.608499 | 0.706858 |
| TAP2    | -0.25265 | -1.20642 | 0.228964 | 0.335661 | 0.22734  | 0.334743 |
| TARBP1  | 0.169615 | 0.864709 | 0.388149 | 0.504508 | 0.386887 | 0.503424 |
| TARBP2  | 0.105477 | 0.866235 | 0.387314 | 0.503827 | 0.391058 | 0.50699  |
| TARDBP  | -0.1291  | -1.16158 | 0.246676 | 0.355734 | 0.252005 | 0.360678 |
| TARP    | 0.225993 | 0.751031 | 0.453444 | 0.568014 | 0.450496 | 0.565224 |
| TARS    | -0.64543 | -3.06382 | 0.002461 | 0.007982 | 0.002372 | 0.007725 |

|          |          |          |          |          |          |          |
|----------|----------|----------|----------|----------|----------|----------|
| TAX1BP1  | 0.410169 | 2.347236 | 0.019809 | 0.046006 | 0.019685 | 0.045802 |
| TAX1BP3  | 0.424396 | 2.43968  | 0.015499 | 0.037434 | 0.015402 | 0.037218 |
| TAZ      | 0.213648 | 2.190457 | 0.029551 | 0.06377  | 0.032416 | 0.068907 |
| TBC1D16  | 0.201525 | 1.057415 | 0.291493 | 0.404254 | 0.290398 | 0.402854 |
| TBC1D22A | 0.347483 | 2.920693 | 0.00386  | 0.011599 | 0.004167 | 0.012403 |
| TBC1D5   | 1.093104 | 6.535565 | 4.42E-10 | 1.02E-08 | 4.26E-10 | 1.00E-08 |
| TBCA     | 0.520474 | 3.920441 | 0.000118 | 0.000613 | 0.000127 | 0.000654 |
| TBCD     | 0.456349 | 4.592846 | 7.39E-06 | 5.48E-05 | 1.01E-05 | 7.36E-05 |
| TBCE     | 0.546046 | 3.01494  | 0.002875 | 0.009063 | 0.002829 | 0.008948 |
| TBL1X    | -0.97187 | -3.41024 | 0.000773 | 0.002986 | 0.000716 | 0.002819 |
| TBP      | 0.103853 | 0.774671 | 0.439374 | 0.555272 | 0.441621 | 0.557064 |
| TBPL1    | 1.009594 | 5.164348 | 5.43E-07 | 5.53E-06 | 5.03E-07 | 5.20E-06 |
| TBRG4    | 0.385947 | 2.858855 | 0.004664 | 0.013647 | 0.004852 | 0.014069 |
| TBX1     | -0.31413 | -2.91622 | 0.003913 | 0.011752 | 0.004372 | 0.012903 |
| TBX19    | 0.619272 | 3.087443 | 0.002281 | 0.007471 | 0.002211 | 0.007286 |
| TBX3     | 0.029613 | 0.201925 | 0.840163 | 0.884185 | 0.840574 | 0.884614 |
| TBXA2R   | 0.805253 | 9.476963 | 4.61E-18 | 8.02E-16 | 2.09E-17 | 3.51E-15 |
| TBXAS1   | 0.252536 | 1.007884 | 0.314627 | 0.428747 | 0.312083 | 0.425752 |
| TCEA1    | 0.221121 | 1.604158 | 0.110127 | 0.189111 | 0.111588 | 0.191004 |
| TCEA2    | -0.1549  | -0.90355 | 0.367229 | 0.483467 | 0.366943 | 0.482737 |
| TCEA3    | -0.20365 | -0.53502 | 0.593183 | 0.69493  | 0.590369 | 0.692846 |
| TCEAL1   | 0.773918 | 3.139236 | 0.001928 | 0.006478 | 0.001826 | 0.006164 |
| TCEAL2   | -0.45805 | -1.24716 | 0.213679 | 0.318924 | 0.210267 | 0.315233 |
| TCEAL3   | 1.285141 | 5.598552 | 6.46E-08 | 8.35E-07 | 5.59E-08 | 7.32E-07 |
| TCEAL8   | 0.73551  | 2.430074 | 0.015905 | 0.038236 | 0.015223 | 0.0369   |
| TCEB2    | 0.079239 | 0.51607  | 0.606328 | 0.705382 | 0.60689  | 0.705802 |
| TCEB3    | 0.971383 | 5.31238  | 2.67E-07 | 2.93E-06 | 2.52E-07 | 2.78E-06 |
| TCERG1   | -0.04614 | -0.32574 | 0.744932 | 0.817651 | 0.745782 | 0.81852  |
| TCF12    | 0.375707 | 1.67364  | 0.095636 | 0.16981  | 0.094225 | 0.167623 |
| TCF15    | -0.14445 | -0.855   | 0.393488 | 0.509437 | 0.393328 | 0.509267 |
| TCF20    | 0.589314 | 5.276845 | 3.17E-07 | 3.41E-06 | 4.14E-07 | 4.35E-06 |
| TCF3     | 0.000771 | 0.007608 | 0.993937 | 0.996268 | 0.99403  | 0.996342 |
| TCF4     | 0.482625 | 3.29901  | 0.001133 | 0.004094 | 0.001164 | 0.004187 |
| TCF7     | 0.248598 | 1.624975 | 0.105613 | 0.182694 | 0.106165 | 0.183447 |
| TCF7L2   | 0.318812 | 1.794167 | 0.074172 | 0.138502 | 0.073812 | 0.138049 |
| TCIRG1   | 0.20538  | 0.772583 | 0.440606 | 0.556081 | 0.437991 | 0.553376 |
| TCL6     | -0.07975 | -0.96664 | 0.334796 | 0.45007  | 0.348077 | 0.46403  |
| TCN1     | -3.91133 | -6.43767 | 7.62E-10 | 1.67E-08 | 5.41E-10 | 1.23E-08 |
| TCN2     | 0.743711 | 4.104708 | 5.72E-05 | 0.00033  | 5.55E-05 | 0.000319 |
| TCOF1    | 0.091135 | 0.572534 | 0.567551 | 0.673483 | 0.567863 | 0.673638 |
| TDP1     | -0.25452 | -1.59766 | 0.111567 | 0.191025 | 0.111831 | 0.191269 |

|           |          |          |          |          |          |          |
|-----------|----------|----------|----------|----------|----------|----------|
| TDRD7     | 0.46475  | 2.685491 | 0.0078   | 0.020947 | 0.007745 | 0.020785 |
| TDRD9     | 1.30995  | 2.44111  | 0.01544  | 0.037348 | 0.014583 | 0.03555  |
| TEAD1     | 1.925155 | 9.104038 | 5.67E-17 | 8.88E-15 | 4.13E-17 | 6.70E-15 |
| TEAD2     | -0.38495 | -2.70475 | 0.007375 | 0.019957 | 0.007562 | 0.020427 |
| TEAD4     | 0.199509 | 1.099996 | 0.272547 | 0.383295 | 0.271811 | 0.38226  |
| TEK       | 1.246706 | 11.21718 | 2.39E-23 | 1.60E-20 | 4.94E-23 | 2.90E-20 |
| TERF2     | 0.251545 | 1.868973 | 0.062968 | 0.120952 | 0.064216 | 0.12294  |
| TERF2IP   | 0.335013 | 2.344567 | 0.019948 | 0.046254 | 0.020333 | 0.046892 |
| TESK1     | 1.014205 | 6.678011 | 1.98E-10 | 5.18E-09 | 2.05E-10 | 5.36E-09 |
| TESK2     | 0.621806 | 3.452685 | 0.000667 | 0.002658 | 0.000653 | 0.00262  |
| TEX264    | 0.188832 | 1.270075 | 0.205412 | 0.309931 | 0.20643  | 0.310869 |
| TFAM      | 0.867979 | 4.839419 | 2.46E-06 | 2.06E-05 | 2.37E-06 | 2.01E-05 |
| TFAP2A    | -0.41234 | -1.67291 | 0.09578  | 0.169939 | 0.094083 | 0.167432 |
| TFB1M     | -0.10014 | -0.59583 | 0.551908 | 0.658869 | 0.551814 | 0.658793 |
| TFCP2     | 0.035755 | 0.223289 | 0.823519 | 0.87312  | 0.823639 | 0.87305  |
| TFCP2L1   | 0.25387  | 0.799354 | 0.424955 | 0.540832 | 0.421797 | 0.537103 |
| TFE3      | 0.047794 | 0.36704  | 0.713945 | 0.794211 | 0.715521 | 0.795964 |
| TFF1      | -4.49929 | -7.64067 | 6.77E-13 | 3.40E-11 | 4.26E-13 | 2.30E-11 |
| TFF3      | -3.16232 | -5.74844 | 3.01E-08 | 4.18E-07 | 2.29E-08 | 3.25E-07 |
| TFG       | -0.13848 | -0.88884 | 0.375067 | 0.491857 | 0.375658 | 0.491809 |
| TFIP11    | 0.081106 | 0.689507 | 0.491238 | 0.603139 | 0.495181 | 0.607187 |
| TFPI      | 1.648817 | 4.128754 | 5.20E-05 | 0.000304 | 4.53E-05 | 0.000271 |
| TFPT      | -0.12184 | -0.64267 | 0.521116 | 0.632553 | 0.520205 | 0.631285 |
| TFR2      | 0.587789 | 2.55904  | 0.011174 | 0.028349 | 0.010811 | 0.027614 |
| TGDS      | -0.03104 | -0.22632 | 0.821168 | 0.87161  | 0.821923 | 0.872017 |
| TGFA      | 0.154642 | 0.797834 | 0.425835 | 0.541511 | 0.424679 | 0.540627 |
| TGFB1I1   | 0.544046 | 2.969286 | 0.003319 | 0.010215 | 0.003262 | 0.01008  |
| TGFB2     | 0.607092 | 2.482273 | 0.01381  | 0.034035 | 0.013332 | 0.033084 |
| TGFB1     | 0.330244 | 1.165502 | 0.245089 | 0.35411  | 0.242186 | 0.351051 |
| TGFB1R1   | 1.178451 | 5.495466 | 1.08E-07 | 1.31E-06 | 9.61E-08 | 1.17E-06 |
| TGFB1R2   | 0.795082 | 4.665846 | 5.36E-06 | 4.17E-05 | 5.26E-06 | 4.10E-05 |
| TGFB1R3   | 0.92351  | 2.937757 | 0.003661 | 0.011095 | 0.003436 | 0.010526 |
| TGFB1RAP1 | 0.782974 | 4.456561 | 1.33E-05 | 9.33E-05 | 1.30E-05 | 9.10E-05 |
| TGIF2     | 0.649682 | 3.351246 | 0.000948 | 0.003531 | 0.000919 | 0.003425 |
| TGM1      | 0.717346 | 4.237906 | 3.33E-05 | 0.000207 | 3.29E-05 | 0.000204 |
| TGM2      | 0.246927 | 0.917054 | 0.360128 | 0.475717 | 0.357336 | 0.472295 |
| TGM3      | -0.41029 | -2.17468 | 0.03073  | 0.065891 | 0.030367 | 0.065231 |
| TH        | -1.02733 | -4.8052  | 2.88E-06 | 2.38E-05 | 2.63E-06 | 2.18E-05 |
| THAP1     | 0.689142 | 4.424868 | 1.52E-05 | 0.000104 | 1.55E-05 | 0.000106 |
| THAP11    | 0.551233 | 6.184145 | 3.04E-09 | 5.59E-08 | 6.19E-09 | 1.01E-07 |
| THAP4     | -0.04822 | -0.24436 | 0.807182 | 0.861587 | 0.806666 | 0.86119  |

|          |          |          |          |          |          |          |
|----------|----------|----------|----------|----------|----------|----------|
| THAP8    | 0.424782 | 2.668606 | 0.008189 | 0.021783 | 0.008231 | 0.02187  |
| THBD     | 1.712589 | 6.243576 | 2.21E-09 | 4.20E-08 | 1.75E-09 | 3.45E-08 |
| THBS1    | 0.457445 | 1.56409  | 0.119247 | 0.201066 | 0.116907 | 0.198148 |
| THBS2    | 0.351534 | 1.046013 | 0.296714 | 0.409801 | 0.29329  | 0.406147 |
| THBS3    | 0.260217 | 1.585583 | 0.114283 | 0.194504 | 0.114341 | 0.194712 |
| THBS4    | -1.71458 | -3.32403 | 0.001041 | 0.003815 | 0.000943 | 0.003499 |
| THOC1    | -0.42563 | -2.50292 | 0.013051 | 0.032506 | 0.013    | 0.032362 |
| THOP1    | -0.26063 | -1.11193 | 0.267394 | 0.37795  | 0.26516  | 0.375432 |
| THRAP3   | 0.902379 | 6.852384 | 7.33E-11 | 2.13E-09 | 8.76E-11 | 2.57E-09 |
| THUMPD3  | 0.439356 | 2.782059 | 0.005875 | 0.016492 | 0.005915 | 0.016616 |
| TIAM1    | -0.22299 | -1.20598 | 0.229134 | 0.335702 | 0.228281 | 0.335497 |
| TIE1     | 0.222636 | 1.641135 | 0.102211 | 0.178055 | 0.103768 | 0.1799   |
| TIFA     | 0.176634 | 1.04992  | 0.294918 | 0.40804  | 0.294788 | 0.407621 |
| TIMELESS | 0.316775 | 2.416229 | 0.016506 | 0.039445 | 0.017095 | 0.040591 |
| TIMM10   | -0.13501 | -0.66715 | 0.505382 | 0.618083 | 0.504078 | 0.616967 |
| TIMM17A  | 0.273734 | 2.287139 | 0.023147 | 0.052354 | 0.02431  | 0.054434 |
| TIMM44   | -0.07098 | -0.60737 | 0.544237 | 0.65253  | 0.547995 | 0.656068 |
| TIMM8B   | 0.284972 | 2.037557 | 0.042802 | 0.087049 | 0.043568 | 0.088454 |
| TIMP1    | -0.31637 | -1.48032 | 0.140232 | 0.228649 | 0.138755 | 0.226755 |
| TIMP2    | 0.573594 | 3.089332 | 0.002267 | 0.007438 | 0.002221 | 0.007309 |
| TIMP3    | 0.27829  | 0.972578 | 0.331841 | 0.446808 | 0.328834 | 0.443732 |
| TINAG    | -0.15862 | -0.53736 | 0.591566 | 0.693529 | 0.589186 | 0.691947 |
| TJP1     | 0.438799 | 2.486368 | 0.013656 | 0.033745 | 0.013545 | 0.033435 |
| TJP2     | -0.05876 | -0.34782 | 0.728313 | 0.805049 | 0.728228 | 0.804388 |
| TK2      | 0.281851 | 2.028202 | 0.043756 | 0.088605 | 0.044568 | 0.090212 |
| TKT      | -0.01143 | -0.05662 | 0.954896 | 0.969961 | 0.95476  | 0.970033 |
| TKTL1    | 2.401401 | 3.843578 | 0.000159 | 0.000786 | 0.000139 | 0.000704 |
| TLE1     | -0.0332  | -0.14184 | 0.887337 | 0.919518 | 0.886816 | 0.919285 |
| TLE2     | -0.8355  | -3.22068 | 0.001474 | 0.005148 | 0.001386 | 0.004894 |
| TLE3     | 0.37339  | 2.239711 | 0.026119 | 0.057742 | 0.026092 | 0.057681 |
| TLE4     | -0.39646 | -1.91623 | 0.056643 | 0.110772 | 0.055812 | 0.109576 |
| TLE6     | -0.45445 | -3.48457 | 0.000596 | 0.002416 | 0.000637 | 0.002562 |
| TLK1     | 0.163104 | 1.101913 | 0.271715 | 0.382468 | 0.272846 | 0.383486 |
| TLK2     | 0.521891 | 3.97068  | 9.73E-05 | 0.000521 | 0.000105 | 0.000556 |
| TLN1     | 0.384078 | 2.149319 | 0.032711 | 0.06944  | 0.032474 | 0.068938 |
| TLR1     | 0.336395 | 1.469078 | 0.143253 | 0.23241  | 0.141474 | 0.230159 |
| TLR10    | -0.46273 | -3.22689 | 0.001444 | 0.005058 | 0.00149  | 0.005216 |
| TLR3     | 0.976789 | 3.199553 | 0.001581 | 0.005481 | 0.001471 | 0.005154 |
| TLR5     | 0.908326 | 3.832709 | 0.000166 | 0.000813 | 0.000154 | 0.000768 |
| TM4SF1   | 2.284794 | 6.941092 | 4.39E-11 | 1.37E-09 | 3.18E-11 | 1.05E-09 |
| TM4SF4   | 0.596046 | 0.997225 | 0.319761 | 0.433981 | 0.315569 | 0.429035 |



|           |          |          |          |          |          |          |
|-----------|----------|----------|----------|----------|----------|----------|
| TM4SF5    | 1.839397 | 5.120788 | 6.68E-07 | 6.71E-06 | 5.51E-07 | 5.61E-06 |
| TM7SF2    | -0.40184 | -1.62972 | 0.104605 | 0.181485 | 0.102829 | 0.178836 |
| TM7SF3    | 0.387473 | 1.019836 | 0.308937 | 0.42234  | 0.305265 | 0.41866  |
| TM9SF1    | 0.56016  | 3.400547 | 0.0008   | 0.003074 | 0.000799 | 0.003086 |
| TM9SF2    | 0.15692  | 0.938626 | 0.348962 | 0.464498 | 0.34889  | 0.464659 |
| TMC4      | 0.387699 | 1.471416 | 0.142621 | 0.231543 | 0.140367 | 0.228876 |
| TMCC1     | 1.730586 | 8.019214 | 6.46E-14 | 4.60E-12 | 4.99E-14 | 3.90E-12 |
| TMED3     | 0.657572 | 2.935326 | 0.003689 | 0.011164 | 0.003544 | 0.010773 |
| TMED5     | 0.249022 | 1.752946 | 0.081017 | 0.147991 | 0.082023 | 0.149422 |
| TMED9     | -0.13469 | -1.05294 | 0.293533 | 0.406363 | 0.296568 | 0.409316 |
| TMEM18    | 0.426724 | 2.832976 | 0.005044 | 0.014562 | 0.005123 | 0.014718 |
| TMEM25    | -0.50178 | -3.26945 | 0.001252 | 0.004462 | 0.001271 | 0.004525 |
| TMEM37    | 0.843561 | 2.825152 | 0.005164 | 0.014846 | 0.004879 | 0.014121 |
| TMEM38A   | 0.481847 | 1.854398 | 0.065033 | 0.124351 | 0.063549 | 0.12181  |
| TMEM38B   | 1.392808 | 6.408349 | 8.96E-10 | 1.92E-08 | 7.57E-10 | 1.65E-08 |
| TMF1      | 1.32807  | 7.06411  | 2.14E-11 | 7.30E-10 | 1.89E-11 | 6.68E-10 |
| TMOD3     | 1.295945 | 6.556097 | 3.94E-10 | 9.35E-09 | 3.45E-10 | 8.40E-09 |
| TMPO      | 1.164283 | 5.247362 | 3.65E-07 | 3.86E-06 | 3.24E-07 | 3.46E-06 |
| TMPRSS2   | -0.86148 | -2.69924 | 0.007495 | 0.020221 | 0.007092 | 0.019347 |
| TMPRSS4   | -0.72702 | -2.07083 | 0.039552 | 0.08139  | 0.038128 | 0.078978 |
| TNC       | 0.754338 | 2.353694 | 0.019477 | 0.045363 | 0.018652 | 0.043658 |
| TNFAIP1   | 0.618033 | 4.316792 | 2.40E-05 | 0.000155 | 2.53E-05 | 0.000161 |
| TNFAIP2   | 0.244891 | 1.087644 | 0.277953 | 0.389184 | 0.275898 | 0.386849 |
| TNFAIP3   | 0.676289 | 3.04611  | 0.002604 | 0.00836  | 0.002497 | 0.00804  |
| TNFAIP8   | -0.31608 | -1.53056 | 0.127329 | 0.21229  | 0.126062 | 0.210552 |
| TNFRSF10B | -0.27698 | -1.50592 | 0.133534 | 0.220377 | 0.132848 | 0.219623 |
| TNFRSF11B | 0.64042  | 1.277353 | 0.202836 | 0.307328 | 0.199072 | 0.302991 |
| TNFRSF12A | 1.444436 | 5.544767 | 8.47E-08 | 1.05E-06 | 7.12E-08 | 8.93E-07 |
| TNFRSF14  | -0.30861 | -1.86675 | 0.063279 | 0.121293 | 0.063279 | 0.121442 |
| TNFRSF19  | 0.277736 | 1.172097 | 0.242437 | 0.351684 | 0.24019  | 0.348855 |
| TNFRSF1B  | 0.771363 | 3.827192 | 0.000169 | 0.000826 | 0.000161 | 0.000797 |
| TNFRSF21  | 0.820689 | 3.310501 | 0.00109  | 0.003967 | 0.001025 | 0.003762 |
| TNFSF10   | 0.389979 | 1.347278 | 0.179289 | 0.278473 | 0.176558 | 0.275049 |
| TNFSF11   | 0.363019 | 1.262735 | 0.208033 | 0.313169 | 0.205195 | 0.309604 |
| TNFSF13   | 0.122953 | 0.798206 | 0.42562  | 0.541383 | 0.426306 | 0.542132 |
| TNFSF13B  | 0.110602 | 0.550932 | 0.582245 | 0.686024 | 0.581128 | 0.684987 |
| TNIP1     | -0.17044 | -1.30586 | 0.192976 | 0.296111 | 0.195498 | 0.298811 |
| TNIP2     | -0.25034 | -1.92384 | 0.055677 | 0.109171 | 0.057077 | 0.111359 |
| TNK2      | 0.39275  | 3.909666 | 0.000123 | 0.000638 | 0.000156 | 0.000775 |
| TNKS      | 0.108962 | 1.509253 | 0.132682 | 0.219734 | 0.1478   | 0.238796 |
| TNNI2     | -0.88214 | -3.3073  | 0.001102 | 0.003995 | 0.00103  | 0.003776 |

|          |          |          |          |          |          |          |
|----------|----------|----------|----------|----------|----------|----------|
| TNNI3    | 0.660586 | 2.228861 | 0.026844 | 0.059122 | 0.025872 | 0.057358 |
| TNNT2    | 0.692624 | 8.482683 | 3.36E-15 | 3.68E-13 | 1.44E-14 | 1.35E-12 |
| TNNT3    | 0.574776 | 6.525103 | 4.69E-10 | 1.07E-08 | 1.04E-09 | 2.18E-08 |
| TNPO1    | 0.487102 | 3.513413 | 0.000538 | 0.002206 | 0.000564 | 0.002301 |
| TNPO2    | -0.29885 | -2.72473 | 0.006958 | 0.019001 | 0.007632 | 0.020579 |
| TNRC6B   | 0.562888 | 3.170529 | 0.00174  | 0.005922 | 0.001715 | 0.005851 |
| TNRC6C   | 0.027213 | 0.198182 | 0.843087 | 0.886071 | 0.843748 | 0.886567 |
| TOB1     | 0.704641 | 2.432058 | 0.01582  | 0.038072 | 0.015167 | 0.036807 |
| TOM1     | -0.0123  | -0.09471 | 0.92463  | 0.947752 | 0.925069 | 0.947444 |
| TOMM34   | 0.55354  | 3.779424 | 0.000203 | 0.000964 | 0.00021  | 0.000985 |
| TOMM40   | 0.122634 | 0.784211 | 0.433768 | 0.549814 | 0.434303 | 0.549897 |
| TOMM70A  | 0.726386 | 4.475021 | 1.23E-05 | 8.71E-05 | 1.23E-05 | 8.71E-05 |
| TOP2A    | 0.244743 | 0.814679 | 0.416145 | 0.532213 | 0.413107 | 0.529192 |
| TOP2B    | 0.366596 | 2.320221 | 0.021254 | 0.048776 | 0.021363 | 0.048859 |
| TOP3A    | 0.575063 | 4.253277 | 3.13E-05 | 0.000195 | 3.37E-05 | 0.000209 |
| TOP3B    | 0.096123 | 0.793408 | 0.428403 | 0.544188 | 0.432125 | 0.548175 |
| TOPBP1   | 0.991968 | 5.838209 | 1.90E-08 | 2.73E-07 | 1.83E-08 | 2.67E-07 |
| TOR1A    | 0.110355 | 0.753734 | 0.451823 | 0.56667  | 0.453013 | 0.567625 |
| TOR1B    | 0.392756 | 1.867297 | 0.063202 | 0.121245 | 0.062265 | 0.119691 |
| TOX      | 0.157104 | 0.546462 | 0.585307 | 0.688769 | 0.58296  | 0.686694 |
| TP53BP1  | 0.400056 | 2.373695 | 0.018479 | 0.043297 | 0.018433 | 0.043198 |
| TP53I3   | 0.774327 | 2.740092 | 0.006651 | 0.018378 | 0.006321 | 0.017578 |
| TP53INP1 | 0.297625 | 2.098637 | 0.037    | 0.07705  | 0.037628 | 0.078219 |
| TPD52L2  | 0.402541 | 2.521386 | 0.012404 | 0.031011 | 0.012458 | 0.031161 |
| TPI1     | -0.27431 | -1.80795 | 0.071993 | 0.13513  | 0.072491 | 0.135902 |
| TPM1     | -0.71556 | -3.57462 | 0.000432 | 0.00183  | 0.000414 | 0.001756 |
| TPM2     | 0.238594 | 1.474651 | 0.141749 | 0.230606 | 0.141925 | 0.230812 |
| TPMT     | 0.347805 | 1.617223 | 0.107276 | 0.184959 | 0.105942 | 0.183197 |
| TPP1     | 0.709224 | 3.99292  | 8.92E-05 | 0.00048  | 8.71E-05 | 0.000471 |
| TPP2     | 0.079253 | 0.512732 | 0.608658 | 0.707253 | 0.609166 | 0.707457 |
| TPR      | 0.13583  | 0.518436 | 0.60468  | 0.703987 | 0.602652 | 0.70267  |
| TPSAB1   | 1.989889 | 4.767026 | 3.42E-06 | 2.76E-05 | 2.85E-06 | 2.35E-05 |
| TPSG1    | 0.141989 | 1.170661 | 0.243013 | 0.352411 | 0.24679  | 0.355693 |
| TPST2    | 0.198115 | 0.80775  | 0.420115 | 0.536123 | 0.417754 | 0.5334   |
| TPX2     | 0.656889 | 2.988832 | 0.003122 | 0.009716 | 0.003    | 0.009389 |
| TRA2A    | 1.391056 | 5.067889 | 8.57E-07 | 8.46E-06 | 7.34E-07 | 7.33E-06 |
| TRAF1    | 0.045346 | 0.407168 | 0.684284 | 0.770332 | 0.687623 | 0.772425 |
| TRAF3    | -0.03757 | -0.25596 | 0.798223 | 0.855369 | 0.798734 | 0.855916 |
| TRAF4    | -0.33788 | -1.80137 | 0.073027 | 0.136688 | 0.072433 | 0.135872 |
| TRAF5    | -0.35176 | -1.78295 | 0.075987 | 0.141105 | 0.075176 | 0.139876 |
| TRAF6    | 1.093081 | 7.037215 | 2.51E-11 | 8.37E-10 | 2.55E-11 | 8.54E-10 |

|          |          |          |          |          |          |          |
|----------|----------|----------|----------|----------|----------|----------|
| TRAF7    | -0.47102 | -3.08625 | 0.00229  | 0.007489 | 0.002324 | 0.007591 |
| TRAM1    | 0.032034 | 0.173672 | 0.862284 | 0.900208 | 0.862042 | 0.900155 |
| TRAP1    | -0.41306 | -4.35035 | 2.09E-05 | 0.000137 | 2.91E-05 | 0.000183 |
| TRAPPC3  | 0.646934 | 4.851381 | 2.33E-06 | 1.97E-05 | 2.58E-06 | 2.16E-05 |
| TRAPPC4  | -0.42334 | -2.14111 | 0.033375 | 0.070626 | 0.032879 | 0.06964  |
| TRAPPC6B | 0.727244 | 4.475807 | 1.23E-05 | 8.69E-05 | 1.23E-05 | 8.71E-05 |
| TREH     | -0.13301 | -0.52463 | 0.600376 | 0.700016 | 0.598423 | 0.698433 |
| TRERF1   | 0.257897 | 1.110101 | 0.268178 | 0.37851  | 0.265984 | 0.376005 |
| TRIB1    | 0.110105 | 0.289932 | 0.772144 | 0.836578 | 0.770458 | 0.835714 |
| TRIB2    | -0.55735 | -1.67457 | 0.095453 | 0.16959  | 0.093131 | 0.166178 |
| TRIM10   | 0.320886 | 4.700518 | 4.60E-06 | 3.63E-05 | 1.10E-05 | 7.91E-05 |
| TRIM16   | 0.505    | 1.635225 | 0.103445 | 0.180004 | 0.101154 | 0.176803 |
| TRIM21   | 0.464998 | 2.863668 | 0.004596 | 0.013502 | 0.004606 | 0.013481 |
| TRIM22   | -0.11654 | -0.6001  | 0.549065 | 0.656977 | 0.548058 | 0.656068 |
| TRIM23   | 0.192777 | 1.139991 | 0.255541 | 0.364448 | 0.255367 | 0.364367 |
| TRIM26   | 0.515154 | 3.536641 | 0.000495 | 0.002059 | 0.000511 | 0.002114 |
| TRIM28   | -0.00193 | -0.01212 | 0.990338 | 0.99433  | 0.990346 | 0.994345 |
| TRIM29   | -1.78467 | -5.90014 | 1.37E-08 | 2.04E-07 | 1.10E-08 | 1.71E-07 |
| TRIM3    | 0.011237 | 0.110551 | 0.912074 | 0.939903 | 0.913402 | 0.940792 |
| TRIM31   | 1.706005 | 3.266152 | 0.001266 | 0.004508 | 0.00115  | 0.004143 |
| TRIM32   | 0.079331 | 0.596968 | 0.551148 | 0.658296 | 0.553205 | 0.66025  |
| TRIM37   | 1.004494 | 6.874825 | 6.44E-11 | 1.92E-09 | 6.91E-11 | 2.08E-09 |
| TRIM38   | 0.378831 | 2.148522 | 0.032775 | 0.069545 | 0.032575 | 0.069112 |
| TRIM46   | 0.31027  | 3.375407 | 0.000873 | 0.003307 | 0.001102 | 0.003995 |
| TRIM5    | 0.556767 | 4.008823 | 8.38E-05 | 0.000457 | 8.87E-05 | 0.000479 |
| TRIM54   | 0.481783 | 2.375734 | 0.01838  | 0.043086 | 0.018014 | 0.042333 |
| TRIM56   | 0.925769 | 4.907135 | 1.81E-06 | 1.58E-05 | 1.71E-06 | 1.52E-05 |
| TRIO     | 0.218097 | 1.776115 | 0.077109 | 0.142794 | 0.07935  | 0.145625 |
| TRIP10   | -0.21625 | -1.27742 | 0.202813 | 0.307328 | 0.202636 | 0.30653  |
| TRIP11   | 1.393374 | 12.1614  | 2.58E-26 | 7.73E-23 | 5.02E-26 | 1.50E-22 |
| TRIP12   | 0.428636 | 3.147752 | 0.001875 | 0.006337 | 0.00196  | 0.006551 |
| TRIP13   | -0.02993 | -0.11051 | 0.912106 | 0.939903 | 0.911593 | 0.93958  |
| TRIP4    | -0.33309 | -1.7558  | 0.080527 | 0.147324 | 0.079851 | 0.146202 |
| TRMT1    | -0.10494 | -0.64966 | 0.516598 | 0.62853  | 0.516813 | 0.628466 |
| TROAP    | 0.01606  | 0.105293 | 0.91624  | 0.942716 | 0.916383 | 0.942863 |
| TRPA1    | 1.030027 | 4.098126 | 5.88E-05 | 0.000336 | 5.35E-05 | 0.000308 |
| TRPC4AP  | 0.028534 | 0.217519 | 0.828008 | 0.87689  | 0.828947 | 0.877489 |
| TRPC6    | 1.196065 | 6.424418 | 8.20E-10 | 1.77E-08 | 7.43E-10 | 1.62E-08 |
| TRPM4    | -0.26375 | -0.94882 | 0.343761 | 0.459391 | 0.340851 | 0.45641  |
| TRPS1    | -0.17628 | -0.66392 | 0.507446 | 0.620124 | 0.505021 | 0.617642 |
| TRPV6    | 0.091986 | 0.773954 | 0.439796 | 0.555657 | 0.443788 | 0.559024 |

|         |          |          |          |          |          |          |
|---------|----------|----------|----------|----------|----------|----------|
| TRRAP   | -0.06144 | -0.30329 | 0.761961 | 0.829562 | 0.761252 | 0.829173 |
| TRUB2   | 0.358587 | 2.226693 | 0.026991 | 0.059343 | 0.027063 | 0.059546 |
| TSC1    | 0.888925 | 6.601719 | 3.05E-10 | 7.43E-09 | 3.53E-10 | 8.55E-09 |
| TSC2    | -0.44821 | -3.49583 | 0.000572 | 0.002334 | 0.000616 | 0.002489 |
| TSM     | 0.177165 | 0.753524 | 0.451948 | 0.56667  | 0.449823 | 0.564681 |
| TSG101  | 0.277116 | 1.741168 | 0.083065 | 0.150619 | 0.083295 | 0.151387 |
| TSN     | -0.01564 | -0.08639 | 0.931232 | 0.953134 | 0.93113  | 0.953125 |
| TSNAX   | 0.308974 | 2.644629 | 0.008773 | 0.023177 | 0.009403 | 0.024512 |
| TSPAN1  | -1.65688 | -4.18075 | 4.21E-05 | 0.000253 | 3.66E-05 | 0.000225 |
| TSPYL2  | 0.215755 | 1.510137 | 0.132457 | 0.219438 | 0.13369  | 0.220626 |
| TSPYL4  | 1.028584 | 4.722588 | 4.17E-06 | 3.33E-05 | 3.80E-06 | 3.06E-05 |
| TSSC1   | -0.24267 | -1.49043 | 0.137556 | 0.225445 | 0.137681 | 0.225549 |
| TSSC4   | 0.538308 | 4.052597 | 7.05E-05 | 0.000393 | 7.62E-05 | 0.000419 |
| TST     | -1.54913 | -5.1775  | 5.10E-07 | 5.24E-06 | 4.28E-07 | 4.49E-06 |
| TSTA3   | -0.24959 | -0.96649 | 0.334872 | 0.45007  | 0.332214 | 0.447009 |
| TTC1    | -0.06643 | -0.50582 | 0.613493 | 0.711253 | 0.615447 | 0.712639 |
| TTC13   | 0.426692 | 2.20971  | 0.028166 | 0.061514 | 0.027772 | 0.06074  |
| TTC14   | 0.424329 | 1.54632  | 0.123478 | 0.206823 | 0.121253 | 0.203825 |
| TTC4    | 0.399999 | 3.23012  | 0.001429 | 0.005015 | 0.001542 | 0.005346 |
| TTC7A   | 0.657928 | 4.903809 | 1.84E-06 | 1.60E-05 | 2.03E-06 | 1.75E-05 |
| TTF2    | 0.033526 | 0.236998 | 0.812881 | 0.865551 | 0.813521 | 0.866036 |
| TTK     | 1.292202 | 4.303497 | 2.54E-05 | 0.000163 | 2.24E-05 | 0.000146 |
| TLL1    | -0.03882 | -0.34186 | 0.732782 | 0.808658 | 0.735459 | 0.811042 |
| TTN     | 0.158011 | 1.904355 | 0.058181 | 0.113276 | 0.065173 | 0.124315 |
| TTR     | 1.216848 | 3.131728 | 0.001976 | 0.006625 | 0.001823 | 0.006158 |
| TUBB    | -0.03437 | -0.23902 | 0.811318 | 0.864551 | 0.811888 | 0.864689 |
| TUBB4   | 1.030356 | 7.934456 | 1.10E-13 | 7.17E-12 | 1.38E-13 | 8.78E-12 |
| TUBE1   | 0.326484 | 2.734429 | 0.006763 | 0.018533 | 0.007234 | 0.019697 |
| TUBGCP2 | 0.903522 | 6.621097 | 2.74E-10 | 6.80E-09 | 3.12E-10 | 7.69E-09 |
| TUBGCP3 | -0.5798  | -2.33682 | 0.020356 | 0.04706  | 0.019708 | 0.045833 |
| TUFT1   | 0.288698 | 1.144919 | 0.253498 | 0.36214  | 0.250979 | 0.359853 |
| TULP3   | -0.1064  | -0.74565 | 0.456681 | 0.57146  | 0.458148 | 0.57299  |
| TUSC2   | 0.256654 | 2.235563 | 0.026394 | 0.058232 | 0.027903 | 0.060913 |
| TXN2    | 0.405351 | 2.976135 | 0.003249 | 0.010051 | 0.003381 | 0.010393 |
| TXNDC11 | -0.25461 | -1.42827 | 0.154646 | 0.247814 | 0.15412  | 0.246971 |
| TXNDC9  | 0.887841 | 5.297121 | 2.87E-07 | 3.12E-06 | 2.82E-07 | 3.05E-06 |
| TXNL1   | -0.52576 | -1.8791  | 0.061565 | 0.118636 | 0.059993 | 0.115989 |
| TXNL4A  | -0.18587 | -1.18333 | 0.237966 | 0.345838 | 0.23846  | 0.346856 |
| TXNRD2  | 0.169023 | 1.696515 | 0.091216 | 0.162947 | 0.096502 | 0.170704 |
| TYK2    | 0.157944 | 1.232829 | 0.218967 | 0.32496  | 0.221839 | 0.328495 |
| TYMS    | -1.43892 | -5.5588  | 7.89E-08 | 9.87E-07 | 6.64E-08 | 8.44E-07 |

|        |          |          |          |          |          |          |
|--------|----------|----------|----------|----------|----------|----------|
| TYRO3  | 0.279998 | 1.799745 | 0.073284 | 0.137061 | 0.073631 | 0.137766 |
| TYROBP | -0.21929 | -1.29038 | 0.198286 | 0.301991 | 0.19808  | 0.30197  |
| U2AF1  | -1.32019 | -7.73667 | 3.75E-13 | 2.07E-11 | 3.46E-13 | 1.98E-11 |
| U2AF2  | -0.04703 | -0.4435  | 0.657844 | 0.748099 | 0.662083 | 0.751822 |
| UBA52  | 0.364016 | 3.241763 | 0.001374 | 0.004852 | 0.001541 | 0.005346 |
| UBE2A  | 0.485421 | 3.74774  | 0.000229 | 0.001065 | 0.000247 | 0.001136 |
| UBE2B  | 0.189263 | 0.919491 | 0.358855 | 0.474302 | 0.357281 | 0.472295 |
| UBE2C  | 0.792126 | 3.402277 | 0.000795 | 0.003058 | 0.000751 | 0.002923 |
| UBE2D2 | 0.429872 | 2.948248 | 0.003544 | 0.010788 | 0.003628 | 0.010996 |
| UBE2D3 | -0.06255 | -0.40814 | 0.683575 | 0.769718 | 0.684055 | 0.76989  |
| UBE2E3 | 1.059793 | 6.727414 | 1.50E-10 | 4.00E-09 | 1.51E-10 | 4.02E-09 |
| UBE2G1 | 0.479398 | 3.055471 | 0.002527 | 0.008153 | 0.00255  | 0.008175 |
| UBE2G2 | 0.273884 | 1.659953 | 0.098362 | 0.173536 | 0.09838  | 0.173135 |
| UBE2J1 | -0.17261 | -1.07991 | 0.281376 | 0.392423 | 0.281714 | 0.393012 |
| UBE2L3 | 0.351166 | 2.020826 | 0.044521 | 0.090076 | 0.044331 | 0.089769 |
| UBE2L6 | 0.356195 | 1.714303 | 0.087894 | 0.157914 | 0.086813 | 0.15657  |
| UBE2M  | -0.17875 | -0.97806 | 0.329131 | 0.444005 | 0.328334 | 0.443184 |
| UBE2V2 | -0.40107 | -2.56795 | 0.010899 | 0.027798 | 0.010982 | 0.027977 |
| UBE4B  | -0.36777 | -2.01137 | 0.045518 | 0.091817 | 0.04515  | 0.091153 |
| UBL3   | 0.518971 | 3.385651 | 0.000842 | 0.003215 | 0.000856 | 0.003238 |
| UBN1   | 0.781515 | 6.041567 | 6.52E-09 | 1.05E-07 | 7.71E-09 | 1.23E-07 |
| UBOX5  | 0.045499 | 0.460561 | 0.645573 | 0.73993  | 0.65104  | 0.743594 |
| UBP1   | 0.821659 | 5.937932 | 1.13E-08 | 1.72E-07 | 1.25E-08 | 1.88E-07 |
| UBQLN1 | 0.899373 | 5.167856 | 5.34E-07 | 5.46E-06 | 5.16E-07 | 5.31E-06 |
| UBQLN2 | 1.087124 | 7.422246 | 2.55E-12 | 1.09E-10 | 2.74E-12 | 1.18E-10 |
| UBR1   | 0.027387 | 0.179902 | 0.857396 | 0.896898 | 0.857644 | 0.897157 |
| UBTD1  | 0.880966 | 6.919635 | 4.97E-11 | 1.54E-09 | 6.20E-11 | 1.89E-09 |
| UCHL1  | 0.145279 | 0.534987 | 0.593204 | 0.69493  | 0.591033 | 0.693423 |
| UCHL3  | -0.50512 | -2.31076 | 0.021781 | 0.049791 | 0.021256 | 0.04871  |
| UCK2   | -0.05522 | -0.33657 | 0.736766 | 0.811721 | 0.736821 | 0.811556 |
| UCN    | -0.00385 | -0.02485 | 0.980199 | 0.98713  | 0.980227 | 0.987158 |
| UCP2   | 0.108297 | 0.450022 | 0.653142 | 0.745089 | 0.651549 | 0.743643 |
| UFD1L  | -0.16809 | -1.18966 | 0.235474 | 0.343278 | 0.237107 | 0.345155 |
| UGCG   | 0.070934 | 0.300145 | 0.764352 | 0.831587 | 0.763267 | 0.830725 |
| UGT1A6 | 0.431804 | 1.041368 | 0.298858 | 0.411622 | 0.295053 | 0.407636 |
| UGT8   | -0.16891 | -0.35795 | 0.720728 | 0.799396 | 0.71852  | 0.79779  |
| UHRF1  | -0.85784 | -3.42351 | 0.000738 | 0.002898 | 0.000691 | 0.002746 |
| ULK1   | -0.34116 | -2.53768 | 0.011858 | 0.029771 | 0.012257 | 0.030724 |
| ULK2   | 0.726918 | 4.664239 | 5.40E-06 | 4.18E-05 | 5.49E-06 | 4.26E-05 |
| UMPS   | 0.226859 | 1.961914 | 0.051045 | 0.101229 | 0.053305 | 0.105223 |
| UNC119 | 1.004711 | 7.346488 | 4.02E-12 | 1.66E-10 | 4.66E-12 | 1.94E-10 |

|          |          |          |          |          |          |          |
|----------|----------|----------|----------|----------|----------|----------|
| UNC13B   | 0.660482 | 2.58693  | 0.010334 | 0.026627 | 0.009923 | 0.02571  |
| UNC93B1  | -0.29229 | -1.28968 | 0.198529 | 0.302166 | 0.196579 | 0.300204 |
| UNG      | 0.225767 | 1.235091 | 0.218126 | 0.324227 | 0.217362 | 0.323394 |
| UNKL     | 0.898171 | 5.523502 | 9.42E-08 | 1.16E-06 | 9.36E-08 | 1.15E-06 |
| UPF3A    | -0.57395 | -3.29268 | 0.001158 | 0.00417  | 0.001144 | 0.004125 |
| UPK1A    | 0.090428 | 0.37897  | 0.705079 | 0.786396 | 0.703719 | 0.78577  |
| UPP1     | 0.605174 | 2.385149 | 0.017928 | 0.042237 | 0.017317 | 0.040878 |
| UQCRB    | 0.594992 | 4.02798  | 7.77E-05 | 0.000428 | 8.03E-05 | 0.00044  |
| UQCRC1   | -0.24656 | -1.40602 | 0.161143 | 0.255941 | 0.160722 | 0.255114 |
| UQCRC2   | 0.065958 | 0.363345 | 0.7167   | 0.79671  | 0.716285 | 0.796625 |
| UQCRCFS1 | 0.471544 | 2.077546 | 0.038922 | 0.080376 | 0.03807  | 0.078892 |
| UROD     | -0.04958 | -0.3566  | 0.721735 | 0.800225 | 0.722783 | 0.80137  |
| UROS     | 0.967736 | 6.364981 | 1.14E-09 | 2.35E-08 | 1.18E-09 | 2.41E-08 |
| USF2     | 0.424284 | 3.877481 | 0.00014  | 0.000709 | 0.000166 | 0.000817 |
| USP1     | 0.345259 | 2.284597 | 0.023299 | 0.052596 | 0.023546 | 0.053206 |
| USP10    | 0.851459 | 5.330433 | 2.44E-07 | 2.70E-06 | 2.45E-07 | 2.72E-06 |
| USP13    | 0.380332 | 2.001395 | 0.04659  | 0.093538 | 0.046093 | 0.092778 |
| USP14    | 0.082664 | 0.428848 | 0.668458 | 0.757779 | 0.667704 | 0.756742 |
| USP15    | 0.647211 | 3.647413 | 0.000331 | 0.001456 | 0.000325 | 0.001434 |
| USP16    | 0.089213 | 0.548608 | 0.583836 | 0.687382 | 0.58398  | 0.68738  |
| USP2     | 0.510588 | 4.083715 | 6.22E-05 | 0.000352 | 6.94E-05 | 0.000386 |
| USP30    | 0.64968  | 4.596274 | 7.28E-06 | 5.41E-05 | 7.74E-06 | 5.74E-05 |
| USP31    | 0.567114 | 2.839891 | 0.00494  | 0.014332 | 0.004812 | 0.013969 |
| USP32    | 0.264598 | 1.525025 | 0.128702 | 0.214124 | 0.128384 | 0.21354  |
| USP33    | 0.668606 | 3.769488 | 0.000211 | 0.000992 | 0.000206 | 0.000972 |
| USP39    | 0.173816 | 1.154747 | 0.249458 | 0.358548 | 0.250392 | 0.359342 |
| USP42    | -0.23426 | -1.49098 | 0.137413 | 0.225445 | 0.137817 | 0.225693 |
| USP48    | -0.11446 | -0.44599 | 0.656047 | 0.747134 | 0.654292 | 0.746039 |
| USP5     | -0.13571 | -1.02737 | 0.305385 | 0.419032 | 0.307961 | 0.421987 |
| USP53    | 1.011322 | 5.034726 | 1.00E-06 | 9.66E-06 | 9.22E-07 | 9.03E-06 |
| USP7     | 0.076023 | 0.589666 | 0.556025 | 0.662438 | 0.558418 | 0.665121 |
| USP8     | 0.311798 | 2.339557 | 0.020211 | 0.046771 | 0.020833 | 0.047885 |
| USP9X    | 0.30332  | 1.634733 | 0.103548 | 0.180117 | 0.102891 | 0.178836 |
| USP9Y    | 1.668269 | 5.275799 | 3.18E-07 | 3.41E-06 | 2.63E-07 | 2.88E-06 |
| UST      | 0.938921 | 3.131219 | 0.001979 | 0.006631 | 0.001848 | 0.00623  |
| UTP14A   | -0.05222 | -0.38155 | 0.70317  | 0.785597 | 0.7044   | 0.786012 |
| UTRN     | 0.406395 | 1.768825 | 0.078321 | 0.144462 | 0.076985 | 0.142453 |
| UTY      | 0.436712 | 2.487401 | 0.013618 | 0.033686 | 0.013514 | 0.033395 |
| UVRAG    | 0.238081 | 1.319299 | 0.188453 | 0.29038  | 0.187806 | 0.289596 |
| UXT      | -0.17237 | -1.18447 | 0.237517 | 0.345505 | 0.23881  | 0.347111 |
| VAMP2    | -0.29139 | -1.51629 | 0.130896 | 0.217235 | 0.129971 | 0.215701 |

|          |          |          |          |          |          |          |
|----------|----------|----------|----------|----------|----------|----------|
| VAMP3    | 0.123546 | 0.713614 | 0.476229 | 0.589641 | 0.475894 | 0.589225 |
| VAMP4    | 0.907884 | 4.558501 | 8.58E-06 | 6.27E-05 | 8.04E-06 | 5.93E-05 |
| VAMP5    | 0.168964 | 1.413593 | 0.158908 | 0.253178 | 0.162459 | 0.25709  |
| VANGL1   | 0.806164 | 4.24857  | 3.19E-05 | 0.000199 | 3.05E-05 | 0.000191 |
| VAPA     | 0.460025 | 1.820206 | 0.070099 | 0.132422 | 0.068609 | 0.130019 |
| VAPB     | -0.14661 | -0.71477 | 0.475513 | 0.589641 | 0.474087 | 0.587763 |
| VASP     | 1.148339 | 6.361276 | 1.16E-09 | 2.39E-08 | 1.07E-09 | 2.23E-08 |
| VAT1     | 0.557388 | 3.675694 | 0.000299 | 0.001333 | 0.000305 | 0.001353 |
| VAV1     | -0.26094 | -1.32972 | 0.185    | 0.286147 | 0.183823 | 0.284388 |
| VAV2     | -0.1269  | -0.90238 | 0.367851 | 0.484014 | 0.369585 | 0.485888 |
| VAV3     | -0.79294 | -1.74801 | 0.08187  | 0.149028 | 0.079406 | 0.14567  |
| VBPI     | 0.331849 | 2.170505 | 0.031049 | 0.066332 | 0.03131  | 0.066889 |
| VDAC1    | -0.11099 | -0.49586 | 0.620493 | 0.717012 | 0.61902  | 0.71607  |
| VDAC3    | -0.47744 | -2.71796 | 0.007097 | 0.019323 | 0.007032 | 0.019226 |
| VDR      | 0.701948 | 3.155822 | 0.001827 | 0.00618  | 0.001746 | 0.00595  |
| VEGFB    | 0.24798  | 1.404209 | 0.16168  | 0.256512 | 0.161209 | 0.255715 |
| VGLL4    | 0.739367 | 5.057462 | 9.00E-07 | 8.82E-06 | 9.48E-07 | 9.18E-06 |
| VIL1     | -0.25312 | -0.80669 | 0.420724 | 0.536754 | 0.417585 | 0.533328 |
| VIP      | -1.60372 | -3.17442 | 0.001718 | 0.005856 | 0.00157  | 0.005413 |
| VIPR1    | 0.547124 | 2.241235 | 0.026019 | 0.057547 | 0.025269 | 0.056207 |
| VIPR2    | 0.897412 | 7.12242  | 1.52E-11 | 5.59E-10 | 1.94E-11 | 6.80E-10 |
| VKORC1L1 | 1.017522 | 5.506586 | 1.02E-07 | 1.25E-06 | 9.59E-08 | 1.17E-06 |
| VNN1     | 1.112328 | 1.87579  | 0.062021 | 0.119417 | 0.059786 | 0.115683 |
| VPS11    | 0.40666  | 3.773723 | 0.000207 | 0.00098  | 0.000246 | 0.001135 |
| VPS13C   | 0.188224 | 0.945048 | 0.34568  | 0.4613   | 0.344299 | 0.459849 |
| VPS13D   | 0.232317 | 1.480728 | 0.140123 | 0.228649 | 0.140542 | 0.229039 |
| VPS28    | 0.381249 | 2.292052 | 0.022857 | 0.051786 | 0.022837 | 0.051827 |
| VPS35    | 0.640391 | 2.977527 | 0.003234 | 0.010021 | 0.003117 | 0.009694 |
| VPS41    | 1.641932 | 7.091499 | 1.83E-11 | 6.55E-10 | 1.45E-11 | 5.44E-10 |
| VPS4A    | 0.309993 | 2.738938 | 0.006674 | 0.018418 | 0.007253 | 0.019734 |
| VPS4B    | 0.351295 | 1.925791 | 0.055431 | 0.108734 | 0.055025 | 0.108209 |
| VPS54    | 0.54006  | 3.063485 | 0.002463 | 0.007985 | 0.002433 | 0.007887 |
| VRK2     | 0.513079 | 2.645057 | 0.008762 | 0.023162 | 0.008588 | 0.0227   |
| VRK3     | 0.186456 | 1.255355 | 0.210694 | 0.31603  | 0.21173  | 0.317022 |
| VSIG2    | -0.33738 | -1.04247 | 0.298351 | 0.411232 | 0.295013 | 0.407636 |
| VSIG4    | 0.45067  | 1.590315 | 0.113213 | 0.193079 | 0.111    | 0.190401 |
| VSNL1    | -1.9275  | -3.85373 | 0.000153 | 0.000764 | 0.000135 | 0.000684 |
| VTI1B    | 1.020229 | 5.576372 | 7.23E-08 | 9.11E-07 | 6.78E-08 | 8.54E-07 |
| WARS     | -0.78893 | -3.51192 | 0.000541 | 0.002215 | 0.000511 | 0.002114 |
| WAS      | 0.250788 | 3.044355 | 0.002619 | 0.008385 | 0.003398 | 0.010431 |
| WASF1    | 1.685845 | 5.255403 | 3.51E-07 | 3.73E-06 | 2.91E-07 | 3.14E-06 |

|         |          |          |          |          |          |          |
|---------|----------|----------|----------|----------|----------|----------|
| WASF2   | 0.093154 | 0.531528 | 0.595594 | 0.696168 | 0.595239 | 0.696273 |
| WASL    | 0.313801 | 1.758641 | 0.080042 | 0.146608 | 0.079647 | 0.145943 |
| WBP11   | 0.035143 | 0.234115 | 0.815116 | 0.867144 | 0.815491 | 0.867347 |
| WBP2    | 0.181031 | 1.136453 | 0.257015 | 0.366005 | 0.257381 | 0.366129 |
| WDFY1   | 0.445412 | 2.929088 | 0.003761 | 0.011338 | 0.003816 | 0.011489 |
| WDHD1   | 0.310724 | 1.344974 | 0.180031 | 0.279441 | 0.178057 | 0.276834 |
| WDR1    | 0.035715 | 0.263462 | 0.792443 | 0.85033  | 0.793379 | 0.85122  |
| WDR18   | 0.493092 | 2.884356 | 0.004316 | 0.012821 | 0.004289 | 0.012701 |
| WDR20   | 0.062686 | 0.393972 | 0.693987 | 0.777644 | 0.694224 | 0.777981 |
| WDR26   | 1.003619 | 6.625593 | 2.67E-10 | 6.70E-09 | 2.77E-10 | 6.92E-09 |
| WDR3    | 0.859685 | 4.595959 | 7.29E-06 | 5.41E-05 | 6.94E-06 | 5.25E-05 |
| WDR33   | -0.17498 | -0.95205 | 0.342124 | 0.457593 | 0.341287 | 0.456734 |
| WDR4    | 0.108947 | 0.78937  | 0.430754 | 0.54673  | 0.43265  | 0.548545 |
| WDR44   | 0.49226  | 4.621823 | 6.51E-06 | 4.93E-05 | 8.40E-06 | 6.19E-05 |
| WDR45   | 0.965966 | 6.139739 | 3.86E-09 | 6.70E-08 | 3.90E-09 | 6.85E-08 |
| WDR5    | -0.20082 | -1.23643 | 0.217628 | 0.32379  | 0.217803 | 0.323743 |
| WFS1    | -0.66829 | -3.12798 | 0.002    | 0.006682 | 0.001922 | 0.006448 |
| WHSC1   | -0.34189 | -1.93799 | 0.053916 | 0.106205 | 0.053643 | 0.105801 |
| WISP1   | 0.792841 | 4.005168 | 8.50E-05 | 0.000462 | 8.09E-05 | 0.000442 |
| WISP2   | 1.819845 | 5.883426 | 1.50E-08 | 2.20E-07 | 1.19E-08 | 1.80E-07 |
| WNK1    | -0.28992 | -2.03405 | 0.043158 | 0.087589 | 0.043827 | 0.088864 |
| WNK2    | -0.03261 | -0.25525 | 0.798767 | 0.855562 | 0.800015 | 0.856352 |
| WNT10B  | -0.14022 | -0.99226 | 0.322172 | 0.436372 | 0.323863 | 0.43803  |
| WNT4    | 0.185464 | 1.041561 | 0.298769 | 0.411622 | 0.29817  | 0.410606 |
| WRN     | 0.639508 | 3.591556 | 0.000406 | 0.001733 | 0.000398 | 0.001696 |
| WT1     | 0.930974 | 2.416174 | 0.016508 | 0.039445 | 0.015696 | 0.037831 |
| WTAP    | 0.04237  | 0.223764 | 0.82315  | 0.872926 | 0.822774 | 0.872724 |
| WWP1    | 0.789025 | 4.522935 | 1.00E-05 | 7.24E-05 | 9.76E-06 | 7.14E-05 |
| WWP2    | 0.87729  | 8.318579 | 9.66E-15 | 9.08E-13 | 1.84E-14 | 1.70E-12 |
| XBP1    | -0.52094 | -3.64926 | 0.000329 | 0.00145  | 0.000343 | 0.001495 |
| XK      | 0.390392 | 0.855645 | 0.393134 | 0.509297 | 0.389278 | 0.505416 |
| XPC     | 0.367712 | 2.033409 | 0.043223 | 0.087639 | 0.042902 | 0.087176 |
| XPNPEP1 | 0.437789 | 3.28235  | 0.001199 | 0.004298 | 0.001265 | 0.004511 |
| XPNPEP2 | 1.531297 | 3.708019 | 0.000265 | 0.001206 | 0.000237 | 0.001099 |
| XPO1    | -0.52236 | -2.66464 | 0.008283 | 0.021983 | 0.008107 | 0.021614 |
| XPO4    | -0.02037 | -0.1075  | 0.914495 | 0.941539 | 0.91431  | 0.941349 |
| XPR1    | 0.751616 | 4.145297 | 4.86E-05 | 0.000287 | 4.71E-05 | 0.000279 |
| XRCC3   | -0.67984 | -5.03292 | 1.01E-06 | 9.73E-06 | 1.11E-06 | 1.06E-05 |
| XRCC4   | 0.988794 | 3.5306   | 0.000506 | 0.002091 | 0.000467 | 0.001954 |
| XRCC5   | -0.51049 | -3.84336 | 0.000159 | 0.000786 | 0.000171 | 0.000836 |
| XRN1    | 0.266228 | 1.657387 | 0.09888  | 0.173993 | 0.099072 | 0.17407  |



|         |          |          |          |          |          |          |
|---------|----------|----------|----------|----------|----------|----------|
| XYLT1   | -0.08246 | -0.50129 | 0.61667  | 0.713528 | 0.616728 | 0.713946 |
| YAF2    | 0.023532 | 0.188345 | 0.850782 | 0.891566 | 0.85182  | 0.892456 |
| YARS    | -0.24965 | -1.83688 | 0.067589 | 0.128377 | 0.068817 | 0.130313 |
| YEATS4  | 0.45036  | 1.662098 | 0.09793  | 0.17294  | 0.09597  | 0.169891 |
| YES1    | 0.637789 | 3.343374 | 0.000974 | 0.003614 | 0.000947 | 0.003506 |
| YMEIL1  | 0.426261 | 2.819326 | 0.005256 | 0.015062 | 0.005334 | 0.01522  |
| YPEL2   | -0.81092 | -4.82186 | 2.67E-06 | 2.21E-05 | 2.63E-06 | 2.18E-05 |
| YTHDF1  | 0.077099 | 0.460483 | 0.645628 | 0.73993  | 0.645575 | 0.739328 |
| YTHDF3  | 0.720161 | 4.509658 | 1.06E-05 | 7.62E-05 | 1.07E-05 | 7.69E-05 |
| YWHAB   | 0.989154 | 6.607663 | 2.95E-10 | 7.26E-09 | 3.09E-10 | 7.65E-09 |
| YWHAE   | 0.346585 | 1.517733 | 0.13053  | 0.216782 | 0.12883  | 0.214034 |
| YWHAG   | 0.472603 | 2.995233 | 0.003059 | 0.009542 | 0.003083 | 0.009608 |
| YWHAH   | -0.09439 | -0.59024 | 0.555639 | 0.662146 | 0.555921 | 0.66265  |
| YWHAQ   | 0.596742 | 4.551576 | 8.85E-06 | 6.45E-05 | 9.79E-06 | 7.14E-05 |
| YWHAZ   | 0.169234 | 1.141064 | 0.255095 | 0.364046 | 0.256194 | 0.365103 |
| YY1     | 0.304766 | 1.882257 | 0.061133 | 0.11795  | 0.061236 | 0.118097 |
| ZAK     | 0.416499 | 1.346226 | 0.179628 | 0.278907 | 0.176728 | 0.275223 |
| ZBED4   | 0.320587 | 2.172902 | 0.030866 | 0.066043 | 0.03126  | 0.066813 |
| ZBTB11  | 0.06862  | 0.569874 | 0.56935  | 0.674914 | 0.572544 | 0.677823 |
| ZBTB17  | -0.4361  | -4.49041 | 1.15E-05 | 8.20E-05 | 1.60E-05 | 0.000109 |
| ZBTB2   | 1.401444 | 9.133152 | 4.67E-17 | 7.56E-15 | 4.67E-17 | 7.31E-15 |
| ZBTB33  | 0.451009 | 3.949942 | 0.000106 | 0.000554 | 0.000123 | 0.000634 |
| ZCCHC3  | -0.00317 | -0.02921 | 0.976725 | 0.984898 | 0.97701  | 0.985185 |
| ZCWPW1  | -0.28165 | -2.49943 | 0.013177 | 0.032783 | 0.014164 | 0.034659 |
| ZDHHC1  | -0.11263 | -0.81801 | 0.414243 | 0.530791 | 0.416193 | 0.531984 |
| ZDHHC14 | 0.931738 | 6.194776 | 2.87E-09 | 5.34E-08 | 3.00E-09 | 5.46E-08 |
| ZDHHC18 | -0.09201 | -0.92297 | 0.357044 | 0.47244  | 0.364814 | 0.481096 |
| ZDHHC21 | 0.611463 | 3.764317 | 0.000215 | 0.001009 | 0.000215 | 0.001008 |
| ZDHHC5  | 0.272926 | 2.278435 | 0.023669 | 0.053277 | 0.024846 | 0.055476 |
| ZDHHC6  | 0.21005  | 1.239804 | 0.216381 | 0.322445 | 0.216195 | 0.32176  |
| ZDHHC9  | 0.566998 | 3.262598 | 0.001281 | 0.004559 | 0.001267 | 0.004514 |
| ZFP106  | 0.564811 | 3.865134 | 0.000146 | 0.000739 | 0.000152 | 0.00076  |
| ZFP161  | 0.538156 | 5.035773 | 9.97E-07 | 9.64E-06 | 1.33E-06 | 1.24E-05 |
| ZFP36L2 | 0.717759 | 3.02122  | 0.002818 | 0.008908 | 0.002687 | 0.008555 |
| ZFP37   | 1.31864  | 5.311607 | 2.68E-07 | 2.93E-06 | 2.30E-07 | 2.60E-06 |
| ZFP64   | 0.450299 | 4.693041 | 4.75E-06 | 3.75E-05 | 6.84E-06 | 5.19E-05 |
| ZFP91   | 0.139393 | 1.158063 | 0.248105 | 0.35715  | 0.252021 | 0.360678 |
| ZFPL1   | -0.28714 | -1.76242 | 0.0794   | 0.14566  | 0.079486 | 0.145761 |
| ZFPM2   | 0.152666 | 0.622849 | 0.534035 | 0.643415 | 0.53196  | 0.640915 |
| ZFR     | 0.36639  | 2.432602 | 0.015797 | 0.038036 | 0.015991 | 0.038404 |
| ZFX     | 0.009678 | 0.071049 | 0.943424 | 0.962051 | 0.943677 | 0.962101 |

|          |          |          |          |          |          |          |
|----------|----------|----------|----------|----------|----------|----------|
| ZFYVE9   | 0.741698 | 6.109504 | 4.54E-09 | 7.65E-08 | 5.75E-09 | 9.46E-08 |
| ZIC2     | -2.29538 | -4.0854  | 6.18E-05 | 0.000351 | 5.34E-05 | 0.000308 |
| ZMPSTE24 | 0.524073 | 3.37937  | 0.000861 | 0.003273 | 0.000872 | 0.00329  |
| ZMYND11  | 0.428748 | 2.933397 | 0.003711 | 0.011224 | 0.003796 | 0.011445 |
| ZMYND19  | 0.193087 | 1.155191 | 0.249277 | 0.358548 | 0.249203 | 0.358072 |
| ZNF124   | 0.857355 | 3.417822 | 0.000753 | 0.00294  | 0.000705 | 0.002787 |
| ZNF132   | -0.38922 | -1.76299 | 0.079304 | 0.145597 | 0.078079 | 0.14391  |
| ZNF134   | 0.156009 | 0.653668 | 0.514014 | 0.626197 | 0.511979 | 0.62404  |
| ZNF135   | 0.320407 | 3.332964 | 0.001009 | 0.00372  | 0.001234 | 0.004416 |
| ZNF140   | 0.328211 | 1.561719 | 0.119805 | 0.201749 | 0.118496 | 0.199975 |
| ZNF142   | 0.518342 | 4.787675 | 3.11E-06 | 2.54E-05 | 4.02E-06 | 3.22E-05 |
| ZNF148   | 0.819586 | 5.233315 | 3.91E-07 | 4.10E-06 | 3.96E-07 | 4.18E-06 |
| ZNF165   | 1.077503 | 3.048681 | 0.002583 | 0.008309 | 0.0024   | 0.0078   |
| ZNF174   | -0.03093 | -0.21338 | 0.83123  | 0.878791 | 0.83171  | 0.879037 |
| ZNF184   | 0.806692 | 4.146518 | 4.84E-05 | 0.000286 | 4.61E-05 | 0.000274 |
| ZNF187   | 0.638048 | 3.952825 | 0.000104 | 0.00055  | 0.000105 | 0.000553 |
| ZNF189   | 1.146258 | 6.030735 | 6.91E-09 | 1.10E-07 | 6.29E-09 | 1.02E-07 |
| ZNF202   | 0.688417 | 5.213282 | 4.30E-07 | 4.47E-06 | 4.85E-07 | 5.03E-06 |
| ZNF211   | 0.617085 | 2.5873   | 0.010323 | 0.026614 | 0.009955 | 0.025764 |
| ZNF212   | 0.277265 | 2.128189 | 0.034444 | 0.072321 | 0.035466 | 0.074184 |
| ZNF213   | 0.372263 | 3.047119 | 0.002596 | 0.008339 | 0.002794 | 0.008854 |
| ZNF217   | 0.63734  | 2.670361 | 0.008148 | 0.021693 | 0.00784  | 0.020997 |
| ZNF22    | 0.877507 | 4.328901 | 2.28E-05 | 0.000148 | 2.14E-05 | 0.000141 |
| ZNF23    | 0.683862 | 3.469738 | 0.000628 | 0.002528 | 0.000605 | 0.002453 |
| ZNF235   | 0.090688 | 0.867918 | 0.386393 | 0.50334  | 0.393003 | 0.508987 |
| ZNF238   | -0.05974 | -0.31404 | 0.753794 | 0.824297 | 0.753262 | 0.823908 |
| ZNF24    | 0.147215 | 0.935189 | 0.350726 | 0.46603  | 0.351217 | 0.466832 |
| ZNF250   | 0.111171 | 0.823973 | 0.410855 | 0.527025 | 0.413069 | 0.529192 |
| ZNF263   | 0.559206 | 3.836145 | 0.000164 | 0.000805 | 0.00017  | 0.000832 |
| ZNF264   | 0.307968 | 1.108499 | 0.268868 | 0.379255 | 0.265984 | 0.376005 |
| ZNF271   | 1.168567 | 6.662344 | 2.17E-10 | 5.60E-09 | 2.02E-10 | 5.30E-09 |
| ZNF3     | 0.300784 | 3.530845 | 0.000505 | 0.002091 | 0.000689 | 0.002742 |
| ZNF300   | 0.790565 | 2.139149 | 0.033535 | 0.070871 | 0.032224 | 0.068561 |
| ZNF317   | 0.289525 | 2.377587 | 0.01829  | 0.042918 | 0.019203 | 0.044807 |
| ZNF318   | 0.053384 | 0.294195 | 0.768888 | 0.834205 | 0.768547 | 0.834026 |
| ZNF32    | 0.716154 | 3.119682 | 0.002055 | 0.006831 | 0.00196  | 0.006551 |
| ZNF324   | 0.666446 | 4.6269   | 6.37E-06 | 4.83E-05 | 6.71E-06 | 5.10E-05 |
| ZNF330   | 0.048922 | 0.394969 | 0.693252 | 0.777077 | 0.695384 | 0.77891  |
| ZNF347   | 0.828226 | 2.958896 | 0.003428 | 0.01049  | 0.003235 | 0.01001  |
| ZNF350   | -0.05184 | -0.25559 | 0.798507 | 0.855478 | 0.797898 | 0.855216 |
| ZNF395   | 0.75641  | 3.788111 | 0.000196 | 0.000938 | 0.000188 | 0.000902 |

|         |          |          |          |          |          |          |
|---------|----------|----------|----------|----------|----------|----------|
| ZNF410  | 0.787081 | 5.955677 | 1.03E-08 | 1.58E-07 | 1.19E-08 | 1.80E-07 |
| ZNF419  | 0.326431 | 1.581037 | 0.115319 | 0.19592  | 0.11411  | 0.194458 |
| ZNF44   | -0.1049  | -0.94104 | 0.347726 | 0.463109 | 0.353103 | 0.468545 |
| ZNF451  | 0.180123 | 0.99747  | 0.319642 | 0.433945 | 0.318935 | 0.432485 |
| ZNF467  | -0.08123 | -0.67138 | 0.502689 | 0.61527  | 0.506151 | 0.618404 |
| ZNF473  | 0.561812 | 4.251342 | 3.15E-05 | 0.000197 | 3.44E-05 | 0.000213 |
| ZNF503  | -0.13289 | -1.00889 | 0.314148 | 0.428218 | 0.316766 | 0.430241 |
| ZNF511  | -0.21664 | -1.20549 | 0.229319 | 0.335764 | 0.22867  | 0.33565  |
| ZNF513  | -0.23184 | -1.34351 | 0.180504 | 0.279989 | 0.180185 | 0.279865 |
| ZNF532  | 0.450623 | 2.182025 | 0.030176 | 0.06491  | 0.029624 | 0.064044 |
| ZNF542  | 0.206837 | 0.772905 | 0.440416 | 0.556081 | 0.437778 | 0.553376 |
| ZNF559  | 0.298851 | 0.869457 | 0.385554 | 0.502664 | 0.382135 | 0.498759 |
| ZNF561  | 1.300364 | 8.430187 | 4.72E-15 | 4.93E-13 | 4.74E-15 | 4.95E-13 |
| ZNF577  | -0.04033 | -0.35849 | 0.720325 | 0.799396 | 0.723212 | 0.801415 |
| ZNF585A | 0.800904 | 3.353597 | 0.000941 | 0.003508 | 0.000887 | 0.00333  |
| ZNF608  | 0.374621 | 2.00845  | 0.045829 | 0.092305 | 0.045395 | 0.091554 |
| ZNF609  | 0.366578 | 2.672764 | 0.008092 | 0.021572 | 0.008354 | 0.022165 |
| ZNF644  | 0.338249 | 2.060469 | 0.040541 | 0.08317  | 0.040565 | 0.083244 |
| ZNF646  | 0.035156 | 0.305835 | 0.760022 | 0.828463 | 0.762336 | 0.830162 |
| ZNF658  | 0.347127 | 1.208051 | 0.228336 | 0.3353   | 0.225434 | 0.332352 |
| ZNF75A  | 0.38093  | 1.889917 | 0.060096 | 0.116331 | 0.059317 | 0.114917 |
| ZNF76   | -0.00256 | -0.02038 | 0.983759 | 0.989443 | 0.983871 | 0.989556 |
| ZNF79   | 0.245506 | 1.276622 | 0.203094 | 0.307584 | 0.202009 | 0.306074 |
| ZNF81   | 0.08511  | 1.029141 | 0.304554 | 0.418172 | 0.317777 | 0.431164 |
| ZNF85   | 0.146921 | 0.641266 | 0.522023 | 0.632922 | 0.520171 | 0.631285 |
| ZNHIT2  | 0.100095 | 0.611141 | 0.541743 | 0.650535 | 0.541842 | 0.650321 |
| ZNRD1   | 0.099648 | 0.532264 | 0.595085 | 0.696004 | 0.594349 | 0.695745 |
| ZSCAN2  | 0.024642 | 0.18187  | 0.855853 | 0.896082 | 0.856513 | 0.896773 |
| ZSWIM1  | 1.113687 | 12.00308 | 8.17E-26 | 9.60E-23 | 3.74E-25 | 3.51E-22 |
| ZW10    | 0.35205  | 2.586133 | 0.010357 | 0.026671 | 0.01069  | 0.027392 |
| ZWINT   | 0.56914  | 2.140172 | 0.033452 | 0.070725 | 0.032445 | 0.068916 |

| non-Affymetrix platform cohorts |          |          |          |             |                |                    |
|---------------------------------|----------|----------|----------|-------------|----------------|--------------------|
| genes                           | betahat  | t.stats  | p.value  | adj.p.value | ebayes.p.value | adj.ebayes.p.value |
| AADAT                           | 1.537316 | 2.556628 | 0.010815 | 0.032986    | 0.01073        | 0.032791           |
| AAK1                            | 2.706813 | 4.946053 | 9.85E-07 | 1.45E-05    | 9.75E-07       | 1.45E-05           |
| AAMP                            | -0.3992  | -1.09969 | 0.27191  | 0.410926    | 0.2742         | 0.413058           |
| AARS                            | -0.15925 | -0.48771 | 0.625935 | 0.739355    | 0.628323       | 0.740873           |
| AATF                            | 1.330779 | 2.448779 | 0.01462  | 0.041925    | 0.014588       | 0.04191            |
| ABAT                            | -0.57501 | -1.15464 | 0.248698 | 0.384627    | 0.248925       | 0.385104           |
| ABCA1                           | -0.49511 | -1.08883 | 0.276667 | 0.416373    | 0.277365       | 0.417291           |
| ABCA3                           | 0.039096 | 0.063059 | 0.94974  | 0.970598    | 0.949677       | 0.970568           |
| ABCA4                           | 0.228925 | 0.343395 | 0.731422 | 0.822413    | 0.730987       | 0.821923           |
| ABCA5                           | -0.35524 | -0.69476 | 0.487478 | 0.619396    | 0.487578       | 0.619523           |
| ABCA6                           | 1.915803 | 2.818438 | 0.004985 | 0.017887    | 0.004907       | 0.01763            |
| ABCA8                           | -1.79515 | -3.39794 | 0.000724 | 0.003651    | 0.000723       | 0.003642           |
| ABCB10                          | 0.311744 | 0.410943 | 0.681262 | 0.784594    | 0.680565       | 0.783984           |
| ABCB6                           | -0.95213 | -1.77779 | 0.075946 | 0.154992    | 0.075891       | 0.154879           |
| ABCB7                           | 0.364274 | 0.94706  | 0.343991 | 0.486243    | 0.345814       | 0.487348           |
| ABCB8                           | -0.1299  | -0.146   | 0.883969 | 0.927793    | 0.883636       | 0.92765            |
| ABCB9                           | -0.57507 | -0.86608 | 0.386793 | 0.526325    | 0.386003       | 0.525554           |
| ABCC10                          | 0.181177 | 0.250773 | 0.802076 | 0.869717    | 0.80167        | 0.869306           |
| ABCC2                           | -1.81577 | -3.01458 | 0.002682 | 0.010776    | 0.002654       | 0.010687           |
| ABCC5                           | 0.283447 | 0.348056 | 0.727921 | 0.819456    | 0.727243       | 0.818783           |
| ABCC8                           | 2.099701 | 2.127705 | 0.03377  | 0.081941    | 0.033207       | 0.080782           |
| ABCD1                           | -2.64004 | -2.62763 | 0.008819 | 0.028197    | 0.008602       | 0.027617           |
| ABCE1                           | 1.217606 | 3.841911 | 0.000135 | 0.000883    | 0.000152       | 0.000977           |
| ABCF1                           | 0.478817 | 1.049033 | 0.294587 | 0.436591    | 0.295268       | 0.437089           |
| ABCF2                           | -0.99059 | -1.31379 | 0.189422 | 0.310689    | 0.18841        | 0.309842           |
| ABCF3                           | 0.180158 | 0.207845 | 0.835421 | 0.89421     | 0.834965       | 0.893722           |
| ABCG2                           | -0.72829 | -1.09404 | 0.27438  | 0.413461    | 0.273574       | 0.412247           |
| ABHD2                           | 0.934264 | 1.672029 | 0.095042 | 0.183448    | 0.094866       | 0.183355           |
| ABHD4                           | 1.466606 | 2.361703 | 0.018511 | 0.050523    | 0.018361       | 0.050263           |
| ABHD5                           | 0.030937 | 0.039609 | 0.968418 | 0.979947    | 0.968341       | 0.979949           |
| ABHD6                           | 3.222316 | 4.206432 | 2.99E-05 | 0.000252    | 2.86E-05       | 0.000244           |
| ABI2                            | -0.5908  | -1.29475 | 0.195907 | 0.318273    | 0.196538       | 0.319077           |
| ABI3BP                          | 1.21537  | 2.517469 | 0.01208  | 0.036026    | 0.012147       | 0.036201           |
| ABL1                            | 0.20797  | 0.260647 | 0.794455 | 0.865339    | 0.793949       | 0.864788           |
| ABLIM1                          | 3.514073 | 5.645484 | 2.55E-08 | 5.93E-07    | 2.44E-08       | 5.70E-07           |
| ABLIM3                          | 2.563524 | 4.78202  | 2.19E-06 | 2.80E-05    | 2.17E-06       | 2.84E-05           |
| ABP1                            | 0.385985 | 0.473869 | 0.635766 | 0.746335    | 0.63489        | 0.745623           |
| ABR                             | -0.82558 | -2.47515 | 0.013594 | 0.039611    | 0.014205       | 0.04106            |

|        |          |          |          |          |          |          |
|--------|----------|----------|----------|----------|----------|----------|
| ABTB1  | 0.540585 | 1.108699 | 0.268006 | 0.406456 | 0.268336 | 0.406649 |
| ABTB2  | 0.017776 | 0.020144 | 0.983935 | 0.988985 | 0.983889 | 0.988939 |
| ACAA1  | 0.730199 | 1.6869   | 0.092144 | 0.179477 | 0.092812 | 0.180479 |
| ACAA2  | -0.27013 | -0.33805 | 0.735442 | 0.82555  | 0.7348   | 0.825026 |
| ACACA  | -0.009   | -0.01371 | 0.989068 | 0.992561 | 0.98905  | 0.992529 |
| ACACB  | 0.051811 | 0.144813 | 0.884907 | 0.928362 | 0.885483 | 0.928759 |
| ACAD8  | -0.37055 | -0.75128 | 0.452778 | 0.588512 | 0.453039 | 0.588688 |
| ACAD9  | 2.071621 | 5.372262 | 1.12E-07 | 2.17E-06 | 1.24E-07 | 2.37E-06 |
| ACADM  | 1.515658 | 3.089858 | 0.002096 | 0.008786 | 0.002108 | 0.00884  |
| ACADS  | 2.24896  | 2.629934 | 0.00876  | 0.028085 | 0.008575 | 0.027596 |
| ACADSB | 1.527793 | 2.826616 | 0.004862 | 0.017536 | 0.004849 | 0.017479 |
| ACAT2  | 0.683707 | 1.91148  | 0.056421 | 0.124263 | 0.057669 | 0.125951 |
| ACBD3  | 1.066901 | 1.780564 | 0.075491 | 0.154265 | 0.075187 | 0.153711 |
| ACBD5  | -1.05906 | -1.71134 | 0.087536 | 0.172431 | 0.08714  | 0.171795 |
| ACCN2  | -0.39229 | -0.75501 | 0.45054  | 0.585926 | 0.450577 | 0.586173 |
| ACHE   | -0.40794 | -0.51142 | 0.609246 | 0.725689 | 0.608346 | 0.724772 |
| ACLY   | 0.012166 | 0.02551  | 0.979657 | 0.98607  | 0.979676 | 0.98602  |
| ACO1   | 0.938402 | 1.86319  | 0.062926 | 0.134342 | 0.063021 | 0.134508 |
| ACOX1  | 2.436241 | 3.866791 | 0.000122 | 0.000813 | 0.00012  | 0.000798 |
| ACOX2  | 2.567578 | 2.740579 | 0.006316 | 0.021669 | 0.006158 | 0.021173 |
| ACP1   | -1.31407 | -2.51362 | 0.012212 | 0.036372 | 0.012212 | 0.03635  |
| ACP5   | -1.72115 | -2.13554 | 0.033122 | 0.080711 | 0.032675 | 0.079778 |
| ACP6   | -1.17884 | -1.32093 | 0.187029 | 0.30811  | 0.185752 | 0.306327 |
| ACSL5  | 1.689968 | 2.978214 | 0.003017 | 0.011845 | 0.002997 | 0.011828 |
| ACTA2  | 0.641904 | 1.77024  | 0.077197 | 0.156863 | 0.078618 | 0.159201 |
| ACTG2  | 0.205516 | 0.385292 | 0.700158 | 0.79853  | 0.700117 | 0.798677 |
| ACTL6A | 0.874724 | 2.036483 | 0.042142 | 0.097474 | 0.042584 | 0.098207 |
| ACTN2  | 0.696677 | 2.302957 | 0.021624 | 0.057257 | 0.022789 | 0.059538 |
| ACTR1A | 0.469217 | 2.127135 | 0.033818 | 0.082007 | 0.037517 | 0.088965 |
| ACVR1  | 1.739453 | 2.622165 | 0.00896  | 0.028533 | 0.008846 | 0.028225 |
| ACVR1B | 0.142342 | 0.305953 | 0.759747 | 0.839993 | 0.760026 | 0.840104 |
| ACVRL1 | 1.035401 | 1.558195 | 0.119716 | 0.220297 | 0.119098 | 0.219375 |
| ACYP1  | -1.14672 | -2.04649 | 0.041145 | 0.095672 | 0.041032 | 0.095497 |
| ACYP2  | -2.23608 | -2.64602 | 0.008359 | 0.027075 | 0.008183 | 0.026666 |
| ADA    | -0.21716 | -0.19312 | 0.846929 | 0.901805 | 0.846404 | 0.901246 |
| ADAM10 | 0.115309 | 0.258808 | 0.795873 | 0.86608  | 0.796212 | 0.866249 |
| ADAM11 | 1.774937 | 2.346345 | 0.019284 | 0.052239 | 0.019007 | 0.051637 |
| ADAM15 | -0.1533  | -0.33885 | 0.734842 | 0.825074 | 0.73523  | 0.825115 |
| ADAM17 | -0.27918 | -1.20065 | 0.230362 | 0.363444 | 0.238651 | 0.372769 |
| ADAM19 | 1.478655 | 2.790417 | 0.005432 | 0.019124 | 0.005427 | 0.019105 |
| ADAM23 | -0.56518 | -0.58543 | 0.558482 | 0.68267  | 0.557253 | 0.681652 |

|          |          |          |          |          |          |          |
|----------|----------|----------|----------|----------|----------|----------|
| ADAM8    | 3.408564 | 3.873629 | 0.000119 | 0.000795 | 0.000114 | 0.000761 |
| ADAMTS1  | -2.21344 | -4.81485 | 1.87E-06 | 2.46E-05 | 1.92E-06 | 2.56E-05 |
| ADAMTS13 | 0.944444 | 2.929271 | 0.003527 | 0.013521 | 0.003769 | 0.01424  |
| ADAMTS18 | 2.419098 | 3.484581 | 0.000529 | 0.002797 | 0.000516 | 0.002734 |
| ADAMTS2  | 2.497324 | 3.679911 | 0.000254 | 0.001543 | 0.000248 | 0.001505 |
| ADAMTS8  | 0.742024 | 1.376569 | 0.169161 | 0.285877 | 0.169058 | 0.285921 |
| ADAR     | -0.82528 | -1.93395 | 0.05359  | 0.118921 | 0.054126 | 0.119883 |
| ADARB1   | 0.109914 | 0.153044 | 0.878415 | 0.924234 | 0.878166 | 0.924178 |
| ADCY1    | -1.68496 | -2.27872 | 0.023035 | 0.059948 | 0.022734 | 0.059494 |
| ADCY2    | 0.667208 | 1.431095 | 0.152925 | 0.265025 | 0.153404 | 0.265639 |
| ADCY3    | 0.879304 | 2.245351 | 0.02511  | 0.06435  | 0.025618 | 0.065355 |
| ADCY9    | 0.040789 | 0.066948 | 0.946645 | 0.968699 | 0.946584 | 0.968636 |
| ADD1     | -0.41421 | -1.39885 | 0.162377 | 0.277013 | 0.166315 | 0.282195 |
| ADD3     | 2.101542 | 3.696552 | 0.000239 | 0.00146  | 0.000236 | 0.001451 |
| ADH1C    | 2.091846 | 2.109298 | 0.035334 | 0.0846   | 0.034751 | 0.083374 |
| ADH4     | 1.232337 | 1.691218 | 0.091316 | 0.178307 | 0.090625 | 0.177253 |
| ADH5     | -1.9262  | -4.86345 | 1.48E-06 | 2.05E-05 | 1.59E-06 | 2.19E-05 |
| ADH6     | 1.635609 | 1.843196 | 0.065795 | 0.138527 | 0.065018 | 0.137465 |
| ADK      | -0.40854 | -0.62913 | 0.529501 | 0.657679 | 0.528868 | 0.657066 |
| ADM      | 0.632956 | 1.255152 | 0.209914 | 0.336377 | 0.210076 | 0.336408 |
| ADPGK    | -0.26685 | -0.42025 | 0.674453 | 0.778661 | 0.674021 | 0.778163 |
| ADRA1B   | -0.88025 | -1.04629 | 0.295848 | 0.437949 | 0.294541 | 0.436839 |
| ADRA1D   | -3.19687 | -4.61386 | 4.84E-06 | 5.45E-05 | 4.64E-06 | 5.27E-05 |
| ADRBK2   | 0.357653 | 0.814856 | 0.415479 | 0.553188 | 0.416358 | 0.553887 |
| ADRM1    | -0.48951 | -0.97412 | 0.330392 | 0.471559 | 0.330582 | 0.471687 |
| ADSL     | 2.313257 | 3.015545 | 0.002674 | 0.01076  | 0.002612 | 0.010547 |
| ADSS     | 2.431933 | 3.867556 | 0.000122 | 0.000812 | 0.000119 | 0.000797 |
| AEBP1    | 1.925147 | 2.504011 | 0.012545 | 0.037152 | 0.012336 | 0.03658  |
| AFG3L2   | 0.652246 | 1.689946 | 0.091559 | 0.178634 | 0.092766 | 0.180479 |
| AGA      | 1.17861  | 1.542021 | 0.123598 | 0.225946 | 0.122718 | 0.224296 |
| AGER     | 1.80091  | 3.421772 | 0.000665 | 0.003395 | 0.000664 | 0.003396 |
| AGGF1    | 0.880706 | 1.825149 | 0.068477 | 0.142535 | 0.068695 | 0.142925 |
| AGL      | -0.05215 | -0.07347 | 0.941459 | 0.965661 | 0.941341 | 0.965515 |
| AGMAT    | 0.678599 | 0.783751 | 0.433497 | 0.569593 | 0.432207 | 0.568375 |
| AGPAT1   | 1.210203 | 2.554428 | 0.010883 | 0.033119 | 0.01096  | 0.033341 |
| AGPAT2   | 1.213144 | 2.112424 | 0.035064 | 0.084039 | 0.034928 | 0.083671 |
| AGR2     | 1.688568 | 2.325403 | 0.020384 | 0.054621 | 0.020118 | 0.054062 |
| AGRN     | 0.681788 | 0.974236 | 0.330333 | 0.471559 | 0.329395 | 0.470312 |
| AGT      | -4.6323  | -4.83722 | 1.68E-06 | 2.27E-05 | 1.56E-06 | 2.15E-05 |
| AGXT     | -3.73349 | -4.36653 | 1.49E-05 | 0.000139 | 1.41E-05 | 0.000133 |
| AHCY     | 0.467342 | 0.676847 | 0.498765 | 0.629991 | 0.497961 | 0.629144 |

|          |          |          |          |          |          |          |
|----------|----------|----------|----------|----------|----------|----------|
| AHR      | 1.121009 | 1.620122 | 0.105733 | 0.199897 | 0.105076 | 0.198736 |
| AHSA1    | -0.0183  | -0.03481 | 0.972246 | 0.982024 | 0.972245 | 0.982028 |
| AIM1     | 0.912951 | 1.914593 | 0.056021 | 0.123499 | 0.056245 | 0.123761 |
| AIM2     | 1.267156 | 3.136286 | 0.001795 | 0.007705 | 0.001852 | 0.007928 |
| AIP      | 1.629849 | 4.785581 | 2.15E-06 | 2.77E-05 | 2.46E-06 | 3.12E-05 |
| AK2      | -0.08787 | -0.16978 | 0.865241 | 0.914467 | 0.865257 | 0.914278 |
| AKAP10   | 1.339303 | 1.9702   | 0.049276 | 0.110972 | 0.048869 | 0.110214 |
| AKAP12   | 1.411246 | 2.872016 | 0.004223 | 0.015517 | 0.004245 | 0.015601 |
| AKAP13   | -0.16222 | -0.29892 | 0.765104 | 0.844724 | 0.765038 | 0.844671 |
| AKAP6    | -0.85502 | -1.14502 | 0.252658 | 0.389626 | 0.251594 | 0.388466 |
| AKAP7    | 0.965328 | 1.111756 | 0.26669  | 0.405513 | 0.265344 | 0.40386  |
| AKAP8    | -0.259   | -0.31835 | 0.750334 | 0.83334  | 0.749709 | 0.833342 |
| AKAP8L   | -0.15433 | -0.5348  | 0.592988 | 0.711889 | 0.596699 | 0.715247 |
| AKAP9    | 2.042045 | 6.104703 | 1.85E-09 | 6.13E-08 | 2.32E-09 | 7.52E-08 |
| AKR1A1   | -0.03179 | -0.05034 | 0.959869 | 0.976418 | 0.959814 | 0.976358 |
| AKR1B1   | 0.001119 | 0.001403 | 0.998881 | 0.998881 | 0.998878 | 0.998878 |
| AKR1B10  | 2.882037 | 3.19091  | 0.001493 | 0.006643 | 0.001445 | 0.006462 |
| AKR1C3   | 2.454194 | 3.549194 | 0.000417 | 0.002296 | 0.000406 | 0.002268 |
| AKR7A2   | -0.31592 | -0.88365 | 0.377239 | 0.516314 | 0.379651 | 0.51871  |
| AKT1S1   | 2.578053 | 2.885037 | 0.004055 | 0.015029 | 0.003948 | 0.014775 |
| AKT2     | -1.96625 | -2.20588 | 0.027772 | 0.069579 | 0.027322 | 0.068598 |
| AKT3     | 1.243303 | 2.908428 | 0.003767 | 0.014222 | 0.003844 | 0.014442 |
| ALAD     | 1.385783 | 3.505992 | 0.000489 | 0.002615 | 0.00051  | 0.00271  |
| ALAS1    | -0.37106 | -0.54042 | 0.589109 | 0.707955 | 0.588422 | 0.707492 |
| ALAS2    | -0.9211  | -0.93997 | 0.347613 | 0.488133 | 0.346088 | 0.487348 |
| ALCAM    | 2.217444 | 4.294376 | 2.04E-05 | 0.000183 | 2.05E-05 | 0.000184 |
| ALDH1A1  | 1.696973 | 1.894484 | 0.058643 | 0.127426 | 0.05791  | 0.1263   |
| ALDH1A2  | -4.82922 | -5.86799 | 7.31E-09 | 2.01E-07 | 6.66E-09 | 1.85E-07 |
| ALDH1B1  | 0.071914 | 0.170895 | 0.864364 | 0.914121 | 0.864691 | 0.914175 |
| ALDH3A1  | 1.296304 | 1.902223 | 0.057622 | 0.125965 | 0.057171 | 0.125328 |
| ALDH3B2  | 1.667763 | 2.183847 | 0.029361 | 0.072938 | 0.028983 | 0.072112 |
| ALDH5A1  | 1.031092 | 1.443748 | 0.149334 | 0.26024  | 0.148504 | 0.259083 |
| ALDH9A1  | 1.27843  | 3.122647 | 0.001879 | 0.008014 | 0.001934 | 0.008213 |
| ALDOA    | -0.66044 | -1.1251  | 0.261    | 0.399056 | 0.260573 | 0.398664 |
| ALDOB    | -2.74671 | -2.71433 | 0.006833 | 0.023043 | 0.006654 | 0.022563 |
| ALDOC    | -0.71048 | -1.11268 | 0.266293 | 0.405173 | 0.265605 | 0.404125 |
| ALG2     | 0.047835 | 0.056026 | 0.95534  | 0.974127 | 0.955217 | 0.974076 |
| ALG3     | 0.010036 | 0.030069 | 0.976022 | 0.983556 | 0.976176 | 0.983711 |
| ALG8     | -2.2536  | -3.54895 | 0.000417 | 0.002296 | 0.000409 | 0.002279 |
| ALOX12P2 | 0.68747  | 0.838348 | 0.40217  | 0.5398   | 0.400938 | 0.538557 |
| ALOX5    | 2.925501 | 4.083835 | 5.03E-05 | 0.000389 | 4.85E-05 | 0.000378 |

|         |          |          |          |          |          |          |
|---------|----------|----------|----------|----------|----------|----------|
| ALOX5AP | 3.027994 | 4.397681 | 1.30E-05 | 0.000125 | 1.25E-05 | 0.000121 |
| ALPK1   | 2.470084 | 2.684379 | 0.007468 | 0.024787 | 0.007291 | 0.024303 |
| ALPL    | 3.040803 | 4.372718 | 1.45E-05 | 0.000136 | 1.39E-05 | 0.000132 |
| AMACR   | 3.268695 | 3.821778 | 0.000146 | 0.000945 | 0.00014  | 0.000914 |
| AMD1    | -0.45481 | -0.94342 | 0.34585  | 0.487112 | 0.346239 | 0.487369 |
| AMFR    | 1.591553 | 2.019233 | 0.043909 | 0.100865 | 0.043388 | 0.099964 |
| AMHR2   | 1.104686 | 1.290596 | 0.197342 | 0.320162 | 0.196104 | 0.318812 |
| AMN     | 1.564151 | 1.490197 | 0.1367   | 0.243921 | 0.135397 | 0.242241 |
| AMPD1   | 0.198009 | 0.276189 | 0.782498 | 0.857084 | 0.782062 | 0.856794 |
| AMPD2   | 0.425817 | 0.763663 | 0.445369 | 0.580809 | 0.445138 | 0.580668 |
| AMPD3   | 0.951269 | 1.607857 | 0.108394 | 0.203618 | 0.108058 | 0.203264 |
| AMPH    | -0.36031 | -0.46499 | 0.642106 | 0.752218 | 0.641307 | 0.751657 |
| AMT     | -0.35133 | -0.71076 | 0.477512 | 0.611812 | 0.477757 | 0.611674 |
| ANAPC10 | 0.898653 | 1.268789 | 0.20501  | 0.330072 | 0.204104 | 0.328862 |
| ANGPT2  | 1.55749  | 1.746166 | 0.081296 | 0.1634   | 0.080415 | 0.161995 |
| ANGPTL4 | 0.903961 | 1.726295 | 0.084811 | 0.168475 | 0.084812 | 0.168194 |
| ANK1    | 2.075675 | 3.697962 | 0.000237 | 0.001455 | 0.000235 | 0.001447 |
| ANK2    | 1.655279 | 3.154282 | 0.00169  | 0.007333 | 0.001689 | 0.007355 |
| ANK3    | -2.38767 | -4.27285 | 2.25E-05 | 0.000199 | 2.22E-05 | 0.000197 |
| ANKH    | 0.678357 | 1.905534 | 0.05719  | 0.125253 | 0.058471 | 0.127171 |
| ANKHD1  | -2.11268 | -3.83685 | 0.000138 | 0.000897 | 0.000137 | 0.000896 |
| ANKRD1  | -0.75243 | -0.90771 | 0.364397 | 0.503577 | 0.363123 | 0.50226  |
| ANKRD10 | 0.396189 | 0.490286 | 0.624111 | 0.737572 | 0.623222 | 0.736521 |
| ANKRD11 | -0.5198  | -1.00903 | 0.313367 | 0.455842 | 0.313444 | 0.455813 |
| ANKRD12 | 1.151294 | 1.598728 | 0.110409 | 0.20639  | 0.109669 | 0.205192 |
| ANKRD16 | 1.947667 | 2.974864 | 0.003049 | 0.011934 | 0.003003 | 0.011839 |
| ANKRD26 | 2.526295 | 2.660988 | 0.008    | 0.02624  | 0.007808 | 0.025754 |
| ANKRD5  | 0.529326 | 0.713446 | 0.475848 | 0.610396 | 0.474871 | 0.60964  |
| ANLN    | 1.346983 | 3.010877 | 0.002715 | 0.010878 | 0.002758 | 0.011042 |
| ANP32B  | -0.51477 | -1.42993 | 0.15326  | 0.265317 | 0.155287 | 0.268097 |
| ANXA1   | 1.628676 | 2.034917 | 0.0423   | 0.097743 | 0.04178  | 0.096827 |
| ANXA10  | 3.392545 | 3.604777 | 0.000338 | 0.001946 | 0.000324 | 0.001883 |
| ANXA11  | -0.36884 | -0.90275 | 0.367022 | 0.506312 | 0.368388 | 0.507154 |
| ANXA13  | -2.76148 | -2.60013 | 0.009549 | 0.029961 | 0.00931  | 0.029367 |
| ANXA4   | 0.388459 | 0.693386 | 0.488336 | 0.619817 | 0.488099 | 0.619683 |
| ANXA5   | -1.12602 | -1.41517 | 0.157539 | 0.270531 | 0.156499 | 0.269234 |
| ANXA6   | -0.21488 | -0.27535 | 0.783144 | 0.857319 | 0.78263  | 0.856828 |
| ANXA7   | -1.09648 | -2.94825 | 0.00332  | 0.012855 | 0.003458 | 0.013331 |
| AOAH    | 0.170546 | 0.299414 | 0.764728 | 0.844706 | 0.764575 | 0.844537 |
| AOC2    | 0.891567 | 1.603236 | 0.10941  | 0.205025 | 0.109235 | 0.204712 |
| AOC3    | 2.695033 | 8.735274 | 2.44E-17 | 6.73E-15 | 4.20E-17 | 1.16E-14 |



|          |          |          |          |          |          |          |
|----------|----------|----------|----------|----------|----------|----------|
| APIB1    | 0.135222 | 0.298967 | 0.765069 | 0.844724 | 0.765416 | 0.844671 |
| APIG1    | -0.72668 | -1.7806  | 0.075485 | 0.154265 | 0.076321 | 0.155595 |
| APIM2    | 1.078548 | 2.444429 | 0.014796 | 0.042328 | 0.014975 | 0.042709 |
| APIS2    | -2.87504 | -6.62779 | 7.62E-11 | 4.07E-09 | 8.24E-11 | 4.35E-09 |
| AP2A2    | -0.36418 | -0.38031 | 0.703848 | 0.800262 | 0.702972 | 0.799799 |
| AP2B1    | 0.502207 | 0.831714 | 0.405902 | 0.543671 | 0.405393 | 0.543025 |
| AP2S1    | -0.3676  | -0.94475 | 0.345166 | 0.487112 | 0.346898 | 0.487712 |
| AP3B1    | -1.60241 | -2.37024 | 0.018093 | 0.049849 | 0.017889 | 0.049429 |
| AP3B2    | 1.16182  | 1.495097 | 0.135417 | 0.242321 | 0.134475 | 0.241072 |
| AP3D1    | 0.436944 | 0.633218 | 0.526834 | 0.655578 | 0.526061 | 0.655311 |
| AP3M1    | -2.29105 | -3.05511 | 0.00235  | 0.009705 | 0.002296 | 0.009518 |
| AP3S2    | 0.188969 | 0.188265 | 0.850733 | 0.90483  | 0.850257 | 0.904324 |
| AP4B1    | -0.71528 | -0.8714  | 0.383888 | 0.522826 | 0.382641 | 0.521279 |
| AP4E1    | 2.037378 | 4.066491 | 5.41E-05 | 0.000414 | 5.45E-05 | 0.000416 |
| AP4M1    | -0.7326  | -1.03768 | 0.299838 | 0.441491 | 0.29888  | 0.44077  |
| AP4S1    | 2.065954 | 4.420029 | 1.17E-05 | 0.000115 | 1.20E-05 | 0.000117 |
| APBA3    | -2.70782 | -3.32239 | 0.000947 | 0.004523 | 0.000918 | 0.004413 |
| APBB1    | -1.56742 | -1.44751 | 0.148279 | 0.259006 | 0.146905 | 0.257344 |
| APBB1IP  | 1.957874 | 1.89732  | 0.058267 | 0.126903 | 0.057443 | 0.12575  |
| APBB2    | 2.238224 | 3.157644 | 0.001671 | 0.007277 | 0.001635 | 0.007127 |
| APC      | -1.37633 | -2.90413 | 0.003819 | 0.01433  | 0.003852 | 0.014462 |
| APC2     | -1.37637 | -1.45564 | 0.146018 | 0.25598  | 0.144782 | 0.254479 |
| APEH     | 0.774727 | 1.023101 | 0.306674 | 0.448162 | 0.305559 | 0.447171 |
| APEX1    | 0.793422 | 2.007708 | 0.045124 | 0.102952 | 0.045842 | 0.10444  |
| APEX2    | 1.627911 | 3.517097 | 0.000469 | 0.002539 | 0.000477 | 0.002565 |
| API5     | -0.2523  | -0.32343 | 0.746481 | 0.832206 | 0.745886 | 0.831941 |
| APLP1    | -2.55341 | -4.35839 | 1.54E-05 | 0.000143 | 1.51E-05 | 0.000141 |
| APLP2    | -1.27088 | -2.31007 | 0.021224 | 0.056453 | 0.02117  | 0.056423 |
| APOBEC1  | 2.19026  | 3.434155 | 0.000636 | 0.00326  | 0.000624 | 0.003209 |
| APOBEC3B | -2.02292 | -2.32655 | 0.020323 | 0.054487 | 0.019971 | 0.053758 |
| APOBEC3C | -0.65558 | -0.79854 | 0.424871 | 0.562189 | 0.423657 | 0.560582 |
| APOBEC3F | -2.52988 | -5.83168 | 8.99E-09 | 2.39E-07 | 9.57E-09 | 2.53E-07 |
| APOC1    | 0.988845 | 1.692024 | 0.091162 | 0.178155 | 0.090882 | 0.177669 |
| APOC2    | -0.25955 | -0.36031 | 0.718744 | 0.812042 | 0.718184 | 0.81132  |
| APP      | 1.268996 | 2.526656 | 0.011772 | 0.035242 | 0.011804 | 0.035404 |
| APPBP2   | -0.7073  | -1.48016 | 0.139357 | 0.246975 | 0.139712 | 0.247603 |
| APRT     | -1.55762 | -3.72677 | 0.000212 | 0.001317 | 0.00022  | 0.001366 |
| APTIX    | -0.34864 | -0.68861 | 0.491334 | 0.622948 | 0.491474 | 0.623126 |
| AQP2     | -1.54862 | -1.75724 | 0.079389 | 0.160415 | 0.078531 | 0.159092 |
| AQP5     | 4.0503   | 3.646083 | 0.000289 | 0.001709 | 0.000276 | 0.001649 |
| AQP7     | -0.48996 | -0.48009 | 0.631336 | 0.743493 | 0.630222 | 0.742553 |

|          |          |          |          |          |          |          |
|----------|----------|----------|----------|----------|----------|----------|
| AQP9     | 0.131184 | 0.202133 | 0.839882 | 0.897455 | 0.839639 | 0.897394 |
| AR       | -0.83411 | -1.79119 | 0.073769 | 0.151454 | 0.074107 | 0.151966 |
| ARF1     | 0.392752 | 1.074324 | 0.283111 | 0.423423 | 0.285349 | 0.426571 |
| ARF3     | 0.464812 | 0.945147 | 0.344965 | 0.487112 | 0.345257 | 0.4873   |
| ARF5     | 0.222393 | 0.316426 | 0.751789 | 0.833941 | 0.751318 | 0.833419 |
| ARFGAP3  | 0.422605 | 1.347502 | 0.178329 | 0.297954 | 0.181751 | 0.30199  |
| ARFGEF2  | 1.380899 | 1.63231  | 0.103141 | 0.195942 | 0.102202 | 0.194632 |
| ARFIP1   | -1.04459 | -1.85452 | 0.064156 | 0.136178 | 0.063998 | 0.135796 |
| ARFRP1   | 2.462349 | 5.839956 | 8.57E-09 | 2.29E-07 | 9.25E-09 | 2.47E-07 |
| ARHGAP1  | 0.108774 | 0.229107 | 0.818864 | 0.882244 | 0.819037 | 0.882192 |
| ARHGAP15 | -2.23263 | -3.25253 | 0.001208 | 0.005573 | 0.001183 | 0.005472 |
| ARHGAP25 | 0.425876 | 0.662573 | 0.507859 | 0.636852 | 0.507232 | 0.63607  |
| ARHGAP26 | 7.077328 | 7.357918 | 6.20E-13 | 6.47E-11 | 5.24E-13 | 5.73E-11 |
| ARHGAP6  | 1.38634  | 1.735063 | 0.083245 | 0.166066 | 0.082469 | 0.164727 |
| ARHGDI A | -0.61932 | -1.27251 | 0.203685 | 0.32875  | 0.204005 | 0.328815 |
| ARHGDI B | -2.21061 | -7.68577 | 6.27E-14 | 7.75E-12 | 1.07E-13 | 1.26E-11 |
| ARHGEF1  | 2.635034 | 3.590975 | 0.000357 | 0.002029 | 0.000346 | 0.001988 |
| ARHGEF11 | 3.87297  | 6.682975 | 5.37E-11 | 3.10E-09 | 5.16E-11 | 3.07E-09 |
| ARHGEF16 | 2.308194 | 6.174817 | 1.22E-09 | 4.23E-08 | 1.42E-09 | 4.85E-08 |
| ARHGEF5  | 0.548803 | 0.572768 | 0.567017 | 0.689338 | 0.565813 | 0.688409 |
| ARHGEF6  | -1.47971 | -2.76496 | 0.005869 | 0.020449 | 0.005859 | 0.020377 |
| ARHGEF7  | 1.71288  | 4.29833  | 2.01E-05 | 0.000182 | 2.13E-05 | 0.00019  |
| ARID1A   | -0.85548 | -1.80164 | 0.072106 | 0.148751 | 0.072379 | 0.149138 |
| ARID1B   | -0.58625 | -1.25011 | 0.21175  | 0.338282 | 0.212253 | 0.338971 |
| ARID3A   | -2.29729 | -2.62148 | 0.008978 | 0.028559 | 0.008784 | 0.028074 |
| ARID4A   | 0.673127 | 0.998749 | 0.31832  | 0.460057 | 0.317475 | 0.459436 |
| ARID4B   | 0.501141 | 1.025867 | 0.305369 | 0.447392 | 0.305694 | 0.447171 |
| ARIH1    | -0.27085 | -0.39292 | 0.69452  | 0.794626 | 0.69398  | 0.794298 |
| ARIH2    | 1.593026 | 2.821779 | 0.004934 | 0.017731 | 0.004907 | 0.01763  |
| ARL1     | -0.15403 | -0.19848 | 0.842734 | 0.898057 | 0.84236  | 0.897704 |
| ARL2BP   | 1.816709 | 2.92754  | 0.003546 | 0.013563 | 0.003504 | 0.013472 |
| ARL3     | 2.730528 | 3.085366 | 0.002127 | 0.008902 | 0.002065 | 0.008687 |
| ARL4A    | 0.367148 | 0.645872 | 0.51861  | 0.647746 | 0.518335 | 0.647403 |
| ARL6IP5  | 2.143252 | 6.54965  | 1.24E-10 | 6.09E-09 | 1.64E-10 | 7.69E-09 |
| ARMC8    | 0.274741 | 0.704544 | 0.481368 | 0.614521 | 0.482928 | 0.615946 |
| ARMCX3   | 2.099526 | 3.352775 | 0.000851 | 0.004147 | 0.000837 | 0.004106 |
| ARNTL    | -0.11344 | -0.17213 | 0.863397 | 0.913925 | 0.863177 | 0.913541 |
| ARPC1A   | 2.096877 | 3.438357 | 0.000626 | 0.003226 | 0.000617 | 0.003182 |
| ARPC1B   | -1.691   | -3.73679 | 0.000204 | 0.001275 | 0.000209 | 0.001304 |
| ARPC2    | 1.524155 | 2.928804 | 0.003532 | 0.01353  | 0.003534 | 0.013558 |
| ARPC3    | 0.413978 | 0.957899 | 0.338501 | 0.480051 | 0.339506 | 0.480916 |

|         |          |          |          |          |          |          |
|---------|----------|----------|----------|----------|----------|----------|
| ARPC4   | 0.271598 | 0.575854 | 0.56493  | 0.68797  | 0.565337 | 0.688007 |
| ARPC5   | 0.548998 | 1.275189 | 0.202738 | 0.327671 | 0.203699 | 0.328547 |
| ARPC5L  | 1.357456 | 1.775169 | 0.076379 | 0.155604 | 0.075689 | 0.154535 |
| ARRB1   | -0.59547 | -1.13706 | 0.255969 | 0.393593 | 0.255974 | 0.393163 |
| ARRDC2  | 2.692881 | 3.833669 | 0.00014  | 0.000908 | 0.000135 | 0.000888 |
| ARSA    | 0.01887  | 0.055858 | 0.955474 | 0.974127 | 0.955749 | 0.974173 |
| ARSB    | 2.129328 | 2.436269 | 0.01513  | 0.043024 | 0.014844 | 0.042438 |
| ARSD    | 5.429474 | 6.889342 | 1.42E-11 | 1.03E-09 | 1.27E-11 | 9.15E-10 |
| ARSE    | 1.822125 | 2.265124 | 0.023862 | 0.061723 | 0.023505 | 0.060969 |
| ARVCF   | 2.298148 | 7.097234 | 3.62E-12 | 3.15E-10 | 5.02E-12 | 4.29E-10 |
| ASAH1   | -1.54321 | -2.65085 | 0.008242 | 0.02677  | 0.008187 | 0.026666 |
| ASAM    | -2.19702 | -4.50248 | 8.08E-06 | 8.34E-05 | 8.18E-06 | 8.45E-05 |
| ASCC3   | 0.082704 | 0.323365 | 0.746532 | 0.832206 | 0.749928 | 0.833342 |
| ASGR1   | 0.022865 | 0.044456 | 0.964556 | 0.978505 | 0.964562 | 0.978511 |
| ASGR2   | 0.741576 | 0.783911 | 0.433402 | 0.569593 | 0.431991 | 0.568375 |
| ASH2L   | -1.33273 | -1.85848 | 0.063592 | 0.135297 | 0.063047 | 0.134508 |
| ASL     | -3.22978 | -5.21086 | 2.59E-07 | 4.46E-06 | 2.50E-07 | 4.35E-06 |
| ASMTL   | 1.114205 | 2.422219 | 0.015722 | 0.044408 | 0.015858 | 0.044711 |
| ASNS    | 1.040018 | 1.670606 | 0.095323 | 0.183915 | 0.094896 | 0.183355 |
| ASPA    | -0.53148 | -0.94136 | 0.346902 | 0.487505 | 0.34661  | 0.487598 |
| ASXL1   | 0.735492 | 0.980566 | 0.327203 | 0.468002 | 0.326108 | 0.467147 |
| ASXL2   | 1.198812 | 1.844378 | 0.065622 | 0.138369 | 0.065205 | 0.137675 |
| ATAD3B  | 2.070343 | 2.541465 | 0.01129  | 0.034169 | 0.011079 | 0.033617 |
| ATE1    | 2.468406 | 4.177852 | 3.38E-05 | 0.00028  | 3.32E-05 | 0.000275 |
| ATF1    | 0.068903 | 0.175363 | 0.860853 | 0.913115 | 0.861327 | 0.913411 |
| ATF2    | -0.43585 | -0.54782 | 0.584017 | 0.703985 | 0.583075 | 0.702845 |
| ATF4    | -0.04294 | -0.10509 | 0.916338 | 0.949259 | 0.916576 | 0.94919  |
| ATF5    | 1.104446 | 3.377802 | 0.000778 | 0.003854 | 0.000845 | 0.004127 |
| ATF6    | -1.43075 | -2.2639  | 0.023938 | 0.061851 | 0.023743 | 0.06142  |
| ATF7IP2 | -2.61442 | -2.75679 | 0.006015 | 0.020788 | 0.005862 | 0.020377 |
| ATIC    | -4.57952 | -6.29061 | 6.11E-10 | 2.21E-08 | 5.60E-10 | 2.06E-08 |
| ATM     | -0.37971 | -0.64521 | 0.519037 | 0.647935 | 0.518657 | 0.647632 |
| ATOX1   | -2.17502 | -6.69249 | 5.06E-11 | 2.97E-09 | 6.76E-11 | 3.78E-09 |
| ATP11C  | -0.50542 | -0.95823 | 0.338335 | 0.479981 | 0.338311 | 0.479656 |
| ATP13A2 | 1.355967 | 2.427045 | 0.015517 | 0.043933 | 0.015461 | 0.043854 |
| ATP1A1  | 2.046866 | 5.283777 | 1.78E-07 | 3.18E-06 | 1.96E-07 | 3.50E-06 |
| ATP1A2  | 2.071678 | 3.024848 | 0.002594 | 0.010512 | 0.002547 | 0.010329 |
| ATP1B1  | -0.33027 | -0.66621 | 0.505532 | 0.634628 | 0.505756 | 0.634896 |
| ATP1B3  | -1.08811 | -3.04806 | 0.002405 | 0.009889 | 0.002529 | 0.010309 |
| ATP2A2  | 0.821906 | 2.58223  | 0.010053 | 0.031147 | 0.010623 | 0.032589 |
| ATP2A3  | -1.51921 | -3.26513 | 0.001157 | 0.005367 | 0.001172 | 0.005427 |

|          |          |          |          |          |          |          |
|----------|----------|----------|----------|----------|----------|----------|
| ATP2B4   | -0.53251 | -1.17086 | 0.242123 | 0.376315 | 0.242806 | 0.377295 |
| ATP5B    | -2.72873 | -8.52285 | 1.27E-16 | 2.60E-14 | 2.02E-16 | 3.96E-14 |
| ATP5C1   | -0.33834 | -0.49615 | 0.619973 | 0.734119 | 0.619341 | 0.733304 |
| ATP5D    | -0.35885 | -0.62677 | 0.53105  | 0.658683 | 0.530758 | 0.658738 |
| ATP5F1   | 0.310411 | 0.707654 | 0.479436 | 0.61349  | 0.480268 | 0.613552 |
| ATP5G1   | 0.306341 | 0.727096 | 0.467451 | 0.603577 | 0.468529 | 0.604053 |
| ATP5G2   | -0.27231 | -0.36521 | 0.715086 | 0.809661 | 0.714476 | 0.808971 |
| ATP5H    | 0.58836  | 2.320248 | 0.020663 | 0.055306 | 0.022521 | 0.058969 |
| ATP5I    | 0.324565 | 0.553867 | 0.579877 | 0.700083 | 0.579544 | 0.699832 |
| ATP5J    | 2.96174  | 8.92251  | 5.54E-18 | 1.86E-15 | 8.65E-18 | 2.71E-15 |
| ATP5J2   | -0.45176 | -1.37551 | 0.169488 | 0.286132 | 0.172392 | 0.290305 |
| ATP5O    | 0.580435 | 1.269922 | 0.204606 | 0.329897 | 0.205237 | 0.330347 |
| ATP6V0A1 | -1.04931 | -2.98667 | 0.002936 | 0.011595 | 0.003091 | 0.012095 |
| ATP6V0A2 | 1.720545 | 1.870732 | 0.06187  | 0.13266  | 0.061093 | 0.131474 |
| ATP6V0B  | -1.2307  | -3.85781 | 0.000127 | 0.000838 | 0.000142 | 0.000922 |
| ATP6V0C  | -0.2326  | -0.7601  | 0.447496 | 0.582935 | 0.451342 | 0.586807 |
| ATP6V0D1 | -2.58928 | -3.35329 | 0.000849 | 0.004147 | 0.000825 | 0.004056 |
| ATP6V1A  | -0.7835  | -1.56705 | 0.117631 | 0.217237 | 0.117791 | 0.217513 |
| ATP6V1B2 | -2.30231 | -3.56175 | 0.000398 | 0.002212 | 0.00039  | 0.002188 |
| ATP6V1C1 | -0.37033 | -0.80362 | 0.421933 | 0.559246 | 0.422537 | 0.559573 |
| ATP6V1F  | 0.576894 | 1.74224  | 0.081981 | 0.164171 | 0.084011 | 0.166965 |
| ATP6V1G1 | 0.522085 | 0.980791 | 0.327092 | 0.467986 | 0.327029 | 0.468038 |
| ATP7A    | 1.319479 | 1.966738 | 0.049675 | 0.111817 | 0.049282 | 0.110932 |
| ATP7B    | 3.856927 | 4.766962 | 2.35E-06 | 2.99E-05 | 2.21E-06 | 2.88E-05 |
| ATP8A1   | 0.569036 | 0.70027  | 0.484031 | 0.616851 | 0.482902 | 0.615946 |
| ATP8A2   | 2.534105 | 3.13692  | 0.001791 | 0.007705 | 0.001743 | 0.00752  |
| ATP8B1   | 1.168472 | 1.670364 | 0.095371 | 0.183932 | 0.094728 | 0.18322  |
| ATP9A    | 1.304668 | 2.97599  | 0.003038 | 0.01192  | 0.003093 | 0.012095 |
| ATP9B    | 2.569637 | 4.533366 | 7.01E-06 | 7.52E-05 | 6.91E-06 | 7.42E-05 |
| ATPIF1   | 0.312771 | 0.880257 | 0.379074 | 0.518071 | 0.38154  | 0.51993  |
| ATR      | 0.275235 | 0.588293 | 0.556557 | 0.681381 | 0.557005 | 0.681573 |
| ATRN     | -0.78632 | -1.22866 | 0.219684 | 0.348941 | 0.219014 | 0.347993 |
| ATXN2    | -1.29727 | -3.78311 | 0.00017  | 0.001083 | 0.000186 | 0.001171 |
| ATXN2L   | 1.109885 | 2.379275 | 0.017659 | 0.049025 | 0.017789 | 0.04924  |
| ATXN3    | 2.435745 | 6.187524 | 1.13E-09 | 3.95E-08 | 1.28E-09 | 4.39E-08 |
| AUH      | 0.475045 | 0.985771 | 0.324644 | 0.465475 | 0.325037 | 0.466039 |
| AURKB    | -0.15138 | -0.15696 | 0.875329 | 0.922226 | 0.874943 | 0.921908 |
| AURKC    | -0.60355 | -1.05989 | 0.289621 | 0.432132 | 0.289296 | 0.431649 |
| AXIN1    | 2.325241 | 3.077736 | 0.002181 | 0.009089 | 0.00213  | 0.008923 |
| AXIN2    | -0.05389 | -0.05185 | 0.958663 | 0.975474 | 0.958526 | 0.975335 |
| AXL      | 1.551054 | 2.803258 | 0.005223 | 0.018527 | 0.005202 | 0.018421 |

|         |          |          |          |          |          |          |
|---------|----------|----------|----------|----------|----------|----------|
| AZGP1   | -0.12343 | -0.14395 | 0.885588 | 0.92887  | 0.885273 | 0.928746 |
| AZI2    | -0.08584 | -0.15902 | 0.873703 | 0.921232 | 0.873673 | 0.921306 |
| B2M     | -0.83056 | -2.14969 | 0.031981 | 0.07849  | 0.032616 | 0.07968  |
| B3GALT6 | -0.02642 | -0.03365 | 0.973168 | 0.982365 | 0.973103 | 0.982299 |
| B4GALT1 | -0.58083 | -0.88598 | 0.375985 | 0.515198 | 0.375225 | 0.514011 |
| B4GALT3 | 1.159445 | 2.658484 | 0.008059 | 0.02636  | 0.008182 | 0.026666 |
| B4GALT4 | 1.171254 | 1.991577 | 0.046872 | 0.10627  | 0.046671 | 0.105865 |
| B4GALT5 | 0.052625 | 0.087334 | 0.930435 | 0.958186 | 0.930361 | 0.958294 |
| B4GALT7 | -1.50724 | -3.25509 | 0.001198 | 0.005535 | 0.001214 | 0.005572 |
| BACE2   | 1.009484 | 2.236853 | 0.025664 | 0.065376 | 0.02589  | 0.065738 |
| BACH1   | 1.47989  | 2.444409 | 0.014797 | 0.042328 | 0.014685 | 0.042138 |
| BACH2   | 0.819657 | 0.817338 | 0.414061 | 0.551768 | 0.412557 | 0.550199 |
| BAD     | 0.392891 | 0.674242 | 0.500418 | 0.631061 | 0.500058 | 0.630471 |
| BAG1    | 0.01824  | 0.024182 | 0.980715 | 0.986382 | 0.980671 | 0.986337 |
| BAG3    | 3.155966 | 6.227962 | 8.91E-10 | 3.15E-08 | 8.97E-10 | 3.17E-08 |
| BAG4    | 0.619497 | 0.89735  | 0.369893 | 0.508779 | 0.368997 | 0.507844 |
| BAG5    | -1.32062 | -2.01601 | 0.044246 | 0.101195 | 0.043908 | 0.100667 |
| BAII    | 3.62915  | 3.754456 | 0.000191 | 0.001195 | 0.000182 | 0.00115  |
| BAI2    | 1.447479 | 1.648384 | 0.099799 | 0.190751 | 0.098835 | 0.189441 |
| BAIAP2  | 0.221581 | 0.290029 | 0.771895 | 0.848633 | 0.771375 | 0.84826  |
| BAK1    | 0.346797 | 0.999578 | 0.317919 | 0.459902 | 0.320649 | 0.462867 |
| BAMBI   | -0.27291 | -0.38759 | 0.698455 | 0.797161 | 0.69789  | 0.796524 |
| BANF1   | -1.7415  | -3.59188 | 0.000355 | 0.002026 | 0.000359 | 0.002043 |
| BAP1    | 0.06079  | 0.107171 | 0.914689 | 0.948358 | 0.914635 | 0.948122 |
| BARD1   | 4.039238 | 4.092617 | 4.85E-05 | 0.000379 | 4.59E-05 | 0.000362 |
| BASP1   | -0.92441 | -1.30371 | 0.192834 | 0.314612 | 0.191942 | 0.313674 |
| BAT2    | 0.235123 | 0.587168 | 0.557313 | 0.68195  | 0.558553 | 0.682675 |
| BAT3    | -1.58775 | -4.74225 | 2.65E-06 | 3.26E-05 | 3.05E-06 | 3.71E-05 |
| BAT4    | 0.081033 | 0.095417 | 0.924016 | 0.954467 | 0.923808 | 0.954236 |
| BATF    | 1.243076 | 2.061653 | 0.039672 | 0.09323  | 0.039458 | 0.092819 |
| BAX     | 1.48712  | 2.426096 | 0.015557 | 0.043994 | 0.015433 | 0.043829 |
| BAZ1A   | 0.641097 | 1.133128 | 0.257615 | 0.395166 | 0.257318 | 0.39471  |
| BAZ2A   | -0.74877 | -1.71018 | 0.087751 | 0.172782 | 0.088356 | 0.173828 |
| BAZ2B   | 1.538306 | 3.436516 | 0.00063  | 0.00324  | 0.000643 | 0.003295 |
| BBX     | -0.01448 | -0.02489 | 0.980148 | 0.986234 | 0.980132 | 0.986217 |
| BCAP29  | 0.606337 | 0.83303  | 0.405161 | 0.542832 | 0.404161 | 0.541647 |
| BCAR1   | 0.858683 | 1.551004 | 0.12143  | 0.222763 | 0.121259 | 0.222537 |
| BCAR3   | 2.527534 | 3.400017 | 0.000719 | 0.003628 | 0.000699 | 0.003544 |
| BCAS1   | -1.11708 | -1.39436 | 0.163727 | 0.278695 | 0.162661 | 0.277498 |
| BCAS2   | 1.830025 | 4.548364 | 6.55E-06 | 7.12E-05 | 6.97E-06 | 7.46E-05 |
| BCAT1   | -0.38991 | -0.57571 | 0.565026 | 0.68797  | 0.564337 | 0.687502 |

|         |          |          |          |          |          |          |
|---------|----------|----------|----------|----------|----------|----------|
| BCAT2   | 1.968588 | 2.699003 | 0.007151 | 0.023974 | 0.007028 | 0.023612 |
| BCCIP   | -1.42068 | -2.75166 | 0.006109 | 0.02105  | 0.006115 | 0.02104  |
| BCKDHA  | -0.60421 | -1.71811 | 0.086293 | 0.17077  | 0.087986 | 0.173245 |
| BCKDK   | 2.766309 | 8.480143 | 1.76E-16 | 3.32E-14 | 2.72E-16 | 5.11E-14 |
| BCL10   | 2.484036 | 3.476071 | 0.000546 | 0.002875 | 0.000531 | 0.0028   |
| BCL2    | -0.7745  | -1.67477 | 0.094503 | 0.182557 | 0.094916 | 0.183355 |
| BCL2A1  | -1.02388 | -2.43302 | 0.015266 | 0.043326 | 0.015513 | 0.043921 |
| BCL2L1  | 1.458587 | 2.792285 | 0.005401 | 0.019044 | 0.005402 | 0.019045 |
| BCL2L11 | -1.44612 | -2.1774  | 0.029841 | 0.073856 | 0.029568 | 0.073218 |
| BCL2L13 | 3.666651 | 4.634641 | 4.39E-06 | 5.04E-05 | 4.16E-06 | 4.79E-05 |
| BCL2L2  | 1.073097 | 3.120403 | 0.001893 | 0.008059 | 0.00201  | 0.008481 |
| BCL3    | 1.234257 | 2.456358 | 0.014319 | 0.041236 | 0.014355 | 0.041431 |
| BCL6    | 1.94787  | 3.1468   | 0.001733 | 0.007499 | 0.001709 | 0.007425 |
| BCL6B   | 2.566824 | 6.569973 | 1.10E-10 | 5.71E-09 | 1.26E-10 | 6.36E-09 |
| BCL7A   | 1.806396 | 4.069251 | 5.35E-05 | 0.00041  | 5.50E-05 | 0.00042  |
| BCL7B   | -0.38548 | -0.67925 | 0.49724  | 0.628859 | 0.496963 | 0.628559 |
| BCL9    | 0.263174 | 0.556035 | 0.578395 | 0.698652 | 0.578777 | 0.699114 |
| BCR     | 2.718231 | 3.916671 | 0.0001   | 0.000687 | 9.71E-05 | 0.000675 |
| BCS1L   | 0.705519 | 0.801058 | 0.423416 | 0.560579 | 0.42209  | 0.559138 |
| BDKRB2  | 2.267152 | 4.424492 | 1.15E-05 | 0.000113 | 1.15E-05 | 0.000114 |
| BDNF    | 2.790065 | 8.899831 | 6.64E-18 | 1.95E-15 | 1.13E-17 | 3.33E-15 |
| BEX2    | -0.92906 | -1.14485 | 0.252728 | 0.389626 | 0.251504 | 0.388455 |
| BFSP1   | 0.005636 | 0.010702 | 0.991465 | 0.993791 | 0.991465 | 0.993791 |
| BICD1   | -3.80743 | -4.83577 | 1.69E-06 | 2.27E-05 | 1.59E-06 | 2.19E-05 |
| BICD2   | 0.059237 | 0.095338 | 0.924078 | 0.954467 | 0.923982 | 0.954236 |
| BID     | 0.075488 | 0.13898  | 0.889512 | 0.931881 | 0.88948  | 0.931693 |
| BIK     | 4.650436 | 6.359154 | 4.03E-10 | 1.53E-08 | 3.69E-10 | 1.45E-08 |
| BIN1    | 1.282454 | 2.418876 | 0.015866 | 0.044707 | 0.015854 | 0.044711 |
| BIN2    | -0.66402 | -1.56071 | 0.119121 | 0.219298 | 0.119964 | 0.22059  |
| BIRC2   | -0.11985 | -0.29459 | 0.76841  | 0.846981 | 0.769066 | 0.847108 |
| BIRC3   | 1.606502 | 2.537172 | 0.011428 | 0.034451 | 0.011313 | 0.034216 |
| BIRC5   | -1.31345 | -2.56987 | 0.010415 | 0.032098 | 0.010431 | 0.032169 |
| BIRC6   | 0.472616 | 1.159609 | 0.246671 | 0.382372 | 0.248034 | 0.384105 |
| BLCAP   | -1.09678 | -1.35143 | 0.17707  | 0.296384 | 0.175954 | 0.294945 |
| BLM     | 1.409066 | 2.508618 | 0.012384 | 0.036745 | 0.012333 | 0.03658  |
| BLMH    | -0.81888 | -2.1386  | 0.032872 | 0.08026  | 0.033546 | 0.081355 |
| BLOC1S1 | -0.62443 | -1.51865 | 0.129379 | 0.23361  | 0.130435 | 0.235153 |
| BLVRA   | -1.7291  | -3.43663 | 0.00063  | 0.00324  | 0.000633 | 0.003249 |
| BLVRB   | -1.10762 | -2.37543 | 0.017843 | 0.049389 | 0.017974 | 0.049606 |
| BMP1    | 3.598491 | 6.348369 | 4.31E-10 | 1.61E-08 | 4.18E-10 | 1.59E-08 |
| BMP2    | 1.948171 | 2.543965 | 0.011211 | 0.033972 | 0.011102 | 0.033481 |

|          |          |          |          |          |          |          |
|----------|----------|----------|----------|----------|----------|----------|
| BMP4     | -1.38095 | -1.53449 | 0.125438 | 0.22801  | 0.124334 | 0.226357 |
| BMP7     | -0.95831 | -1.10892 | 0.267911 | 0.406456 | 0.266572 | 0.404941 |
| BMPR1A   | -0.63736 | -1.56955 | 0.11705  | 0.216588 | 0.118125 | 0.217892 |
| BMPR2    | 0.529917 | 0.850939 | 0.395144 | 0.533825 | 0.394536 | 0.533157 |
| BNIP1    | 0.273536 | 0.429788 | 0.667505 | 0.773871 | 0.667061 | 0.773166 |
| BNIP2    | 1.651874 | 2.844171 | 0.004605 | 0.0167   | 0.004571 | 0.016589 |
| BNIP3L   | -1.77946 | -2.65524 | 0.008136 | 0.026501 | 0.008027 | 0.026235 |
| BPGM     | -1.32614 | -1.53166 | 0.126135 | 0.228893 | 0.125073 | 0.227318 |
| BRAF     | 1.613222 | 2.116044 | 0.034754 | 0.083508 | 0.034331 | 0.082875 |
| BRCA1    | 1.104086 | 1.601494 | 0.109796 | 0.20543  | 0.109133 | 0.204679 |
| BRCA2    | -1.60858 | -3.32625 | 0.000934 | 0.004471 | 0.000942 | 0.004496 |
| BRD1     | 1.567107 | 2.559411 | 0.01073  | 0.032789 | 0.010636 | 0.03261  |
| BRD2     | 0.604077 | 2.368422 | 0.018181 | 0.050001 | 0.019853 | 0.053557 |
| BRD4     | 2.36883  | 8.192405 | 1.56E-15 | 2.44E-13 | 2.82E-15 | 4.42E-13 |
| BRD8     | -3.63589 | -5.36162 | 1.18E-07 | 2.24E-06 | 1.12E-07 | 2.18E-06 |
| BRE      | 1.898428 | 2.697532 | 0.007183 | 0.024062 | 0.007069 | 0.023714 |
| BRF1     | -1.4116  | -1.78498 | 0.074771 | 0.153125 | 0.074051 | 0.151915 |
| BRI3     | -0.06715 | -0.16588 | 0.86831  | 0.917092 | 0.8687   | 0.917297 |
| BSCL2    | 0.886855 | 2.538008 | 0.011401 | 0.034416 | 0.011856 | 0.035479 |
| BSG      | -0.22809 | -0.32275 | 0.746999 | 0.832206 | 0.746513 | 0.832212 |
| BST1     | 1.296821 | 1.683609 | 0.092779 | 0.180489 | 0.092004 | 0.179427 |
| BST2     | -3.84522 | -6.63545 | 7.26E-11 | 3.97E-09 | 6.97E-11 | 3.84E-09 |
| BTAF1    | -1.42252 | -2.10084 | 0.036073 | 0.086143 | 0.035743 | 0.085449 |
| BTBD6    | 1.019348 | 2.071579 | 0.038733 | 0.091526 | 0.038847 | 0.091703 |
| BTC      | 1.877501 | 2.314251 | 0.020992 | 0.055963 | 0.020662 | 0.055357 |
| BTD      | 0.896071 | 1.749944 | 0.080641 | 0.162457 | 0.080704 | 0.162305 |
| BTF3     | -1.66544 | -5.82272 | 9.45E-09 | 2.48E-07 | 1.32E-08 | 3.32E-07 |
| BTG1     | 0.424493 | 0.897094 | 0.37003  | 0.508818 | 0.370512 | 0.509481 |
| BTG2     | 1.69606  | 3.445577 | 0.00061  | 0.003156 | 0.000614 | 0.003175 |
| BTG3     | 1.873041 | 3.202331 | 0.001436 | 0.006426 | 0.001421 | 0.006375 |
| BTK      | -0.36186 | -0.69577 | 0.486842 | 0.618922 | 0.486874 | 0.618964 |
| BTN2A1   | 1.28359  | 2.725382 | 0.006611 | 0.022401 | 0.006667 | 0.022575 |
| BTN2A2   | 0.245551 | 0.363533 | 0.716335 | 0.81049  | 0.715858 | 0.809912 |
| BTN3A1   | -0.43853 | -0.88474 | 0.376653 | 0.515662 | 0.376904 | 0.516157 |
| BTN3A2   | 0.549138 | 0.84284  | 0.399655 | 0.537909 | 0.398921 | 0.537229 |
| BTN3A3   | -0.41579 | -0.561   | 0.575006 | 0.696417 | 0.574161 | 0.695557 |
| BTNL9    | -2.19487 | -2.25557 | 0.024458 | 0.062919 | 0.024011 | 0.061939 |
| BUB1     | -0.65121 | -1.17851 | 0.239064 | 0.373041 | 0.238857 | 0.372945 |
| BYSL     | 0.356024 | 0.38777  | 0.698324 | 0.797161 | 0.697467 | 0.796428 |
| C10orf10 | -0.59131 | -1.1824  | 0.237518 | 0.371369 | 0.237723 | 0.371805 |
| C10orf11 | 1.953201 | 2.341151 | 0.019552 | 0.052813 | 0.019226 | 0.052083 |

|           |          |          |          |          |          |          |
|-----------|----------|----------|----------|----------|----------|----------|
| C10orf116 | 3.731758 | 4.960119 | 9.19E-07 | 1.38E-05 | 8.67E-07 | 1.32E-05 |
| C10orf12  | 1.046536 | 1.228386 | 0.219785 | 0.348983 | 0.218517 | 0.347675 |
| C10orf26  | -0.23927 | -0.34739 | 0.728422 | 0.819823 | 0.727937 | 0.819277 |
| C10orf58  | -0.43636 | -0.80364 | 0.421923 | 0.559246 | 0.421785 | 0.559023 |
| C10orf72  | 0.498942 | 1.007807 | 0.313955 | 0.456132 | 0.314215 | 0.456238 |
| C10orf78  | 0.632021 | 1.052434 | 0.293025 | 0.435512 | 0.292518 | 0.4348   |
| C11orf31  | 2.027761 | 2.365093 | 0.018344 | 0.050272 | 0.018022 | 0.049679 |
| C13orf23  | -1.57258 | -2.41068 | 0.016223 | 0.04555  | 0.016056 | 0.045106 |
| C14orf102 | 1.587147 | 3.573629 | 0.00038  | 0.002131 | 0.000389 | 0.002188 |
| C14orf106 | -0.06269 | -0.19235 | 0.847536 | 0.902247 | 0.848583 | 0.902798 |
| C14orf118 | 0.639472 | 1.629609 | 0.103711 | 0.196917 | 0.104905 | 0.198652 |
| C14orf2   | -0.74275 | -0.87538 | 0.381718 | 0.520173 | 0.380415 | 0.518999 |
| C14orf45  | 1.291448 | 2.208956 | 0.027556 | 0.069222 | 0.02742  | 0.068771 |
| C14orf79  | -0.55864 | -1.07922 | 0.280927 | 0.420897 | 0.280982 | 0.420846 |
| C15orf29  | 0.962853 | 2.49748  | 0.012776 | 0.037599 | 0.01311  | 0.038512 |
| C16orf7   | -0.75467 | -1.68129 | 0.093228 | 0.181138 | 0.093753 | 0.181655 |
| C18orf1   | -0.87164 | -1.48917 | 0.136971 | 0.244313 | 0.136627 | 0.243699 |
| C18orf10  | -1.04201 | -1.91789 | 0.055601 | 0.122803 | 0.055525 | 0.122693 |
| C19orf10  | -0.59064 | -1.08499 | 0.278361 | 0.41812  | 0.278208 | 0.418028 |
| C19orf18  | 0.284908 | 0.4454   | 0.656192 | 0.764907 | 0.655726 | 0.764363 |
| C19orf2   | 1.024223 | 1.730475 | 0.084061 | 0.167198 | 0.083765 | 0.16675  |
| C19orf24  | 3.731666 | 6.434428 | 2.54E-10 | 1.06E-08 | 2.45E-10 | 1.06E-08 |
| C19orf28  | -2.19839 | -7.28906 | 9.92E-13 | 9.92E-11 | 1.52E-12 | 1.52E-10 |
| C1orf35   | -2.59576 | -3.13644 | 0.001794 | 0.007705 | 0.001744 | 0.00752  |
| C1orf9    | 0.918622 | 2.578084 | 0.010173 | 0.031477 | 0.010562 | 0.032468 |
| C1QA      | 1.130946 | 2.205978 | 0.027765 | 0.069579 | 0.027795 | 0.069486 |
| C1QB      | 2.551319 | 4.515177 | 7.62E-06 | 7.98E-05 | 7.52E-06 | 7.94E-05 |
| C1QL1     | 0.270345 | 0.404197 | 0.686212 | 0.78827  | 0.685706 | 0.787975 |
| C1R       | 2.337937 | 4.529088 | 7.15E-06 | 7.57E-05 | 7.16E-06 | 7.63E-05 |
| C1RL      | 1.152039 | 2.299691 | 0.021809 | 0.057604 | 0.021863 | 0.057848 |
| C1S       | 2.71398  | 5.618955 | 2.95E-08 | 6.62E-07 | 3.01E-08 | 6.87E-07 |
| C2        | -0.01257 | -0.0175  | 0.986041 | 0.990467 | 0.986012 | 0.990438 |
| C20orf103 | 0.805421 | 0.757818 | 0.448859 | 0.584225 | 0.447337 | 0.583052 |
| C20orf111 | 1.246606 | 1.651245 | 0.099213 | 0.190018 | 0.09844  | 0.188767 |
| C20orf24  | -0.54336 | -1.17776 | 0.23936  | 0.373379 | 0.239964 | 0.373949 |
| C20orf3   | -0.42279 | -1.19671 | 0.231894 | 0.365175 | 0.234362 | 0.368201 |
| C20orf4   | -0.31323 | -0.27536 | 0.783135 | 0.857319 | 0.782396 | 0.856794 |
| C20orf7   | 2.425212 | 6.771163 | 3.06E-11 | 1.92E-09 | 3.78E-11 | 2.37E-09 |
| C21orf2   | -0.66693 | -2.4952  | 0.012857 | 0.037809 | 0.014004 | 0.040579 |
| C21orf33  | 0.048952 | 0.094703 | 0.924583 | 0.954644 | 0.924593 | 0.954654 |
| C21orf63  | 0.923474 | 1.114198 | 0.265642 | 0.404313 | 0.264373 | 0.402511 |



|          |          |          |          |          |          |          |
|----------|----------|----------|----------|----------|----------|----------|
| C21orf7  | 0.357495 | 0.722442 | 0.470305 | 0.605433 | 0.470547 | 0.605412 |
| C21orf70 | -0.93952 | -1.64772 | 0.099936 | 0.190935 | 0.099703 | 0.190567 |
| C3AR1    | 0.974437 | 2.493225 | 0.012928 | 0.037929 | 0.013246 | 0.038788 |
| C3orf1   | -0.5192  | -0.64606 | 0.518491 | 0.647746 | 0.517427 | 0.646956 |
| C3orf19  | 0.218952 | 0.219024 | 0.826706 | 0.88751  | 0.826158 | 0.887124 |
| C4BPB    | -3.31923 | -4.92397 | 1.10E-06 | 1.60E-05 | 1.05E-06 | 1.55E-05 |
| C4orf14  | -0.80175 | -1.60317 | 0.109425 | 0.205025 | 0.109579 | 0.205187 |
| C5       | 1.365407 | 1.715428 | 0.086785 | 0.171389 | 0.085996 | 0.169966 |
| C5orf13  | -0.38304 | -0.76219 | 0.446245 | 0.581467 | 0.446424 | 0.582173 |
| C5orf15  | -0.55686 | -1.42114 | 0.155798 | 0.268521 | 0.157237 | 0.270306 |
| C6       | 0.798857 | 0.765746 | 0.444129 | 0.57991  | 0.44262  | 0.578025 |
| C6orf1   | 0.673234 | 1.517136 | 0.129761 | 0.234027 | 0.130429 | 0.235153 |
| C6orf108 | -1.29795 | -3.46813 | 0.000562 | 0.002947 | 0.000592 | 0.003076 |
| C6orf129 | 1.005901 | 1.227418 | 0.220149 | 0.349442 | 0.218943 | 0.347993 |
| C6orf130 | 0.560817 | 0.595177 | 0.551951 | 0.676975 | 0.550734 | 0.675755 |
| C6orf153 | 0.860678 | 2.910494 | 0.003743 | 0.014164 | 0.004076 | 0.015072 |
| C6orf35  | -0.3787  | -1.06586 | 0.286917 | 0.428642 | 0.289412 | 0.431653 |
| C6orf64  | 0.654349 | 0.610689 | 0.541637 | 0.667811 | 0.540274 | 0.66648  |
| C6orf89  | 0.831773 | 0.905171 | 0.365739 | 0.504987 | 0.364307 | 0.503601 |
| C7       | -0.23262 | -0.32594 | 0.744584 | 0.831443 | 0.744082 | 0.830883 |
| C7orf26  | -0.78236 | -0.98996 | 0.322595 | 0.464379 | 0.321396 | 0.463712 |
| C9orf114 | 0.001304 | 0.004289 | 0.996579 | 0.997004 | 0.996609 | 0.997033 |
| C9orf23  | -0.12704 | -0.19994 | 0.841592 | 0.897749 | 0.841372 | 0.897514 |
| C9orf3   | 0.8901   | 0.960562 | 0.337161 | 0.478748 | 0.335706 | 0.476826 |
| CA1      | -1.02827 | -1.1802  | 0.238391 | 0.372136 | 0.237065 | 0.371032 |
| CA11     | 0.183824 | 0.202216 | 0.839817 | 0.897455 | 0.839349 | 0.897394 |
| CA12     | 3.785289 | 4.303083 | 1.97E-05 | 0.000179 | 1.86E-05 | 0.000169 |
| CA2      | 1.58536  | 1.9081   | 0.056857 | 0.12481  | 0.056198 | 0.123714 |
| CA3      | 1.382176 | 2.754381 | 0.006059 | 0.020894 | 0.006079 | 0.020976 |
| CA8      | -2.79176 | -3.43585 | 0.000632 | 0.003245 | 0.000611 | 0.003164 |
| CA9      | 1.528841 | 1.259953 | 0.208178 | 0.334165 | 0.20654  | 0.331989 |
| CAB39L   | 1.889916 | 3.688435 | 0.000246 | 0.001503 | 0.000247 | 0.001502 |
| CABIN1   | -1.20303 | -3.30156 | 0.001019 | 0.004812 | 0.001075 | 0.005033 |
| CABYR    | 1.027713 | 1.529972 | 0.126552 | 0.229474 | 0.125896 | 0.228461 |
| CACNA1A  | -1.37835 | -2.12269 | 0.03419  | 0.082589 | 0.033914 | 0.082035 |
| CACNA1C  | 1.025767 | 2.426592 | 0.015536 | 0.043961 | 0.01578  | 0.044544 |
| CACNA1D  | 1.885035 | 5.522465 | 4.99E-08 | 1.06E-06 | 5.94E-08 | 1.23E-06 |
| CACNA1H  | 1.240524 | 2.118181 | 0.034572 | 0.083241 | 0.034412 | 0.082934 |
| CACNA1I  | 1.312417 | 1.737706 | 0.082777 | 0.165389 | 0.082073 | 0.164211 |
| CACNA2D1 | 0.421332 | 0.450391 | 0.652592 | 0.761088 | 0.651605 | 0.760314 |
| CACNA2D2 | 2.009673 | 3.589149 | 0.000359 | 0.00204  | 0.000356 | 0.002034 |

|          |          |          |          |          |          |          |
|----------|----------|----------|----------|----------|----------|----------|
| CACNA2D3 | 2.958395 | 4.807193 | 1.94E-06 | 2.52E-05 | 1.88E-06 | 2.53E-05 |
| CACNA2D4 | -2.51879 | -3.54311 | 0.000426 | 0.002338 | 0.000415 | 0.002302 |
| CACNB1   | 1.338983 | 1.982942 | 0.047831 | 0.108184 | 0.047439 | 0.107349 |
| CACNB3   | 2.738062 | 3.927445 | 9.59E-05 | 0.000665 | 9.29E-05 | 0.000647 |
| CACYBP   | -0.97398 | -1.36893 | 0.171536 | 0.288863 | 0.17067  | 0.287958 |
| CAD      | 2.072974 | 2.859732 | 0.004388 | 0.016012 | 0.004305 | 0.015771 |
| CALCRL   | 2.136649 | 4.076769 | 5.18E-05 | 0.0004   | 5.18E-05 | 0.000399 |
| CALD1    | 0.284341 | 0.719706 | 0.471987 | 0.606601 | 0.473473 | 0.608344 |
| CALM2    | 0.619477 | 1.120659 | 0.262883 | 0.401543 | 0.262671 | 0.40096  |
| CALM3    | -0.19511 | -0.67962 | 0.497007 | 0.628785 | 0.501392 | 0.631274 |
| CALR     | -1.98276 | -5.36597 | 1.15E-07 | 2.21E-06 | 1.30E-07 | 2.48E-06 |
| CAMK1    | -4.03745 | -4.45453 | 1.00E-05 | 0.000101 | 9.44E-06 | 9.61E-05 |
| CAMK1D   | -1.66528 | -2.85135 | 0.004504 | 0.016396 | 0.004469 | 0.016306 |
| CAMK2B   | -2.57032 | -2.61125 | 0.009247 | 0.029229 | 0.009026 | 0.028626 |
| CAMK2D   | 1.988293 | 3.331709 | 0.000916 | 0.004417 | 0.000905 | 0.004368 |
| CAMKK2   | 2.58928  | 4.260808 | 2.37E-05 | 0.000208 | 2.31E-05 | 0.000204 |
| CAMP     | 2.397206 | 2.550054 | 0.011019 | 0.033498 | 0.010776 | 0.032866 |
| CANX     | -0.8     | -1.15343 | 0.249197 | 0.385271 | 0.248299 | 0.384263 |
| CAP2     | 0.17409  | 0.294856 | 0.768206 | 0.846981 | 0.767997 | 0.846724 |
| CAPN1    | 1.260811 | 3.730145 | 0.00021  | 0.001303 | 0.000229 | 0.001414 |
| CAPN12   | 2.888242 | 4.032216 | 6.24E-05 | 0.000467 | 6.02E-05 | 0.000454 |
| CAPN2    | 2.35244  | 5.460369 | 6.97E-08 | 1.43E-06 | 7.40E-08 | 1.51E-06 |
| CAPN3    | -1.21797 | -1.86984 | 0.061995 | 0.132866 | 0.061588 | 0.132174 |
| CAPN5    | 1.580912 | 3.840764 | 0.000136 | 0.000885 | 0.000141 | 0.000919 |
| CAPN7    | 0.354025 | 1.52061  | 0.128886 | 0.232897 | 0.135713 | 0.242622 |
| CAPN9    | 1.776391 | 2.076074 | 0.038314 | 0.090718 | 0.037781 | 0.089545 |
| CAPNS1   | 0.679984 | 2.319671 | 0.020695 | 0.055358 | 0.021936 | 0.057921 |
| CAPS     | -0.36283 | -0.69425 | 0.487797 | 0.619422 | 0.487811 | 0.619528 |
| CAPZA3   | 1.291724 | 1.487069 | 0.137524 | 0.24484  | 0.136418 | 0.243511 |
| CAPZB    | -0.50961 | -1.8489  | 0.064966 | 0.137416 | 0.068066 | 0.141973 |
| CARD11   | 3.480445 | 6.476446 | 1.96E-10 | 8.61E-09 | 1.93E-10 | 8.82E-09 |
| CARHSP1  | 0.139055 | 0.414553 | 0.678618 | 0.782236 | 0.680537 | 0.783984 |
| CARS     | 0.031723 | 0.091918 | 0.926794 | 0.955709 | 0.927213 | 0.956099 |
| CASC3    | -1.2629  | -1.55651 | 0.120117 | 0.220786 | 0.119162 | 0.219375 |
| CASK     | 1.243465 | 1.598389 | 0.110485 | 0.20639  | 0.109625 | 0.205192 |
| CASP1    | -1.48924 | -1.72505 | 0.085035 | 0.168706 | 0.084165 | 0.167192 |
| CASP10   | -0.22524 | -0.38826 | 0.697964 | 0.797117 | 0.697732 | 0.796524 |
| CASP2    | 1.969505 | 3.006913 | 0.00275  | 0.011    | 0.002707 | 0.010864 |
| CASP3    | -0.20156 | -0.33404 | 0.738469 | 0.826996 | 0.738197 | 0.827175 |
| CASP4    | -0.41928 | -1.10478 | 0.269699 | 0.407978 | 0.271615 | 0.410448 |
| CASP7    | -0.57847 | -0.73828 | 0.460631 | 0.596903 | 0.459535 | 0.595483 |

|         |          |          |          |          |          |          |
|---------|----------|----------|----------|----------|----------|----------|
| CASP9   | 4.465733 | 6.308495 | 5.48E-10 | 2.00E-08 | 5.05E-10 | 1.87E-08 |
| CASQ2   | 2.021249 | 3.245008 | 0.00124  | 0.005669 | 0.001222 | 0.005597 |
| CAST    | -1.05842 | -2.22118 | 0.026713 | 0.067391 | 0.026852 | 0.06767  |
| CAT     | -0.25375 | -0.58332 | 0.559895 | 0.683686 | 0.560679 | 0.684644 |
| CAV2    | 2.743029 | 4.338288 | 1.69E-05 | 0.000155 | 1.64E-05 | 0.000152 |
| CBFA2T2 | -0.8698  | -1.25189 | 0.211099 | 0.337701 | 0.210229 | 0.336424 |
| CBFB    | -1.00469 | -3.5394  | 0.000432 | 0.002365 | 0.000495 | 0.002646 |
| CBL     | 1.747521 | 5.364126 | 1.16E-07 | 2.22E-06 | 1.41E-07 | 2.63E-06 |
| CBR1    | -0.29855 | -0.72473 | 0.4689   | 0.604283 | 0.470115 | 0.60532  |
| CBR3    | -0.43058 | -0.61601 | 0.538123 | 0.664991 | 0.537337 | 0.664077 |
| CBR4    | -1.17751 | -1.43772 | 0.151036 | 0.262622 | 0.149969 | 0.260997 |
| CBS     | -1.42896 | -2.36791 | 0.018206 | 0.05004  | 0.018079 | 0.049739 |
| CBX1    | 0.129424 | 0.33404  | 0.738466 | 0.826996 | 0.739388 | 0.827175 |
| CBX3    | -0.37086 | -0.73505 | 0.462594 | 0.599116 | 0.462754 | 0.598993 |
| CBX5    | 1.0112   | 3.244446 | 0.001242 | 0.005669 | 0.001358 | 0.006128 |
| CBX6    | -0.70106 | -1.51758 | 0.129648 | 0.233913 | 0.130134 | 0.23488  |
| CBX7    | 1.949465 | 3.028257 | 0.002566 | 0.010425 | 0.002527 | 0.010309 |
| CCBL1   | 0.04627  | 0.065194 | 0.948041 | 0.969494 | 0.947937 | 0.969387 |
| CCL11   | 1.065161 | 1.269518 | 0.20475  | 0.330015 | 0.203529 | 0.328498 |
| CCL13   | 2.355339 | 2.90679  | 0.003787 | 0.014261 | 0.003697 | 0.014048 |
| CCL16   | 0.873578 | 1.734731 | 0.083304 | 0.166113 | 0.083416 | 0.166309 |
| CCL18   | 0.616538 | 0.821275 | 0.411817 | 0.549713 | 0.410757 | 0.548609 |
| CCL19   | 0.799789 | 1.175408 | 0.240299 | 0.374348 | 0.239454 | 0.373527 |
| CCL20   | 0.803186 | 0.756765 | 0.449489 | 0.584731 | 0.447969 | 0.583512 |
| CCL23   | -0.59531 | -0.64766 | 0.517452 | 0.647357 | 0.5162   | 0.646281 |
| CCL26   | -0.81506 | -1.17663 | 0.239811 | 0.373722 | 0.238923 | 0.372945 |
| CCL5    | 0.819921 | 1.875514 | 0.061209 | 0.131691 | 0.061708 | 0.132311 |
| CCM2    | -0.12105 | -0.23477 | 0.814465 | 0.87939  | 0.814493 | 0.879426 |
| CCNA2   | 1.381661 | 2.070295 | 0.038853 | 0.091742 | 0.038522 | 0.091102 |
| CCNB2   | -0.46328 | -0.55062 | 0.582101 | 0.702142 | 0.581079 | 0.700993 |
| CCNC    | 0.521069 | 0.765173 | 0.44447  | 0.58012  | 0.44365  | 0.57921  |
| CCND1   | -2.89789 | -6.74533 | 3.61E-11 | 2.23E-09 | 3.93E-11 | 2.43E-09 |
| CCND2   | -5.35873 | -6.66001 | 6.21E-11 | 3.52E-09 | 5.54E-11 | 3.26E-09 |
| CCND3   | -1.9     | -4.45483 | 1.00E-05 | 0.000101 | 1.05E-05 | 0.000106 |
| CCNE2   | -3.35987 | -5.35262 | 1.24E-07 | 2.34E-06 | 1.19E-07 | 2.30E-06 |
| CCNF    | 0.210314 | 0.321033 | 0.748297 | 0.832341 | 0.747911 | 0.83258  |
| CCNG1   | -1.18421 | -3.01576 | 0.002672 | 0.01076  | 0.002763 | 0.011045 |
| CCNH    | 0.838176 | 1.582386 | 0.11409  | 0.211779 | 0.114056 | 0.212135 |
| CCNI    | -1.13843 | -2.52796 | 0.011729 | 0.035157 | 0.011859 | 0.035479 |
| CCNK    | -0.17267 | -0.40679 | 0.684304 | 0.786941 | 0.684997 | 0.787603 |
| CCNL1   | -0.84226 | -1.0454  | 0.296262 | 0.438356 | 0.29503  | 0.437078 |

|       |          |          |          |          |          |          |
|-------|----------|----------|----------|----------|----------|----------|
| CCNL2 | 0.197296 | 0.331082 | 0.740699 | 0.828088 | 0.74045  | 0.827825 |
| CCNT1 | -0.29875 | -0.40871 | 0.682897 | 0.7859   | 0.682253 | 0.785351 |
| CCNT2 | -2.5175  | -4.86906 | 1.44E-06 | 2.00E-05 | 1.44E-06 | 2.01E-05 |
| CCR1  | -0.76208 | -1.78901 | 0.074119 | 0.15199  | 0.074774 | 0.153065 |
| CCRL1 | 0.489195 | 0.857782 | 0.391357 | 0.530247 | 0.391034 | 0.529903 |
| CCS   | -2.59978 | -7.20175 | 1.79E-12 | 1.72E-10 | 2.25E-12 | 2.12E-10 |
| CCT2  | 1.032245 | 2.531749 | 0.011604 | 0.034828 | 0.011844 | 0.035479 |
| CCT4  | -2.02337 | -2.72585 | 0.006602 | 0.022401 | 0.006482 | 0.022107 |
| CCT5  | -2.58395 | -3.26104 | 0.001173 | 0.005432 | 0.00114  | 0.005295 |
| CCT6A | 0.518969 | 1.315565 | 0.188824 | 0.310306 | 0.190317 | 0.311669 |
| CCT6B | 1.57994  | 2.348462 | 0.019176 | 0.052019 | 0.018966 | 0.051557 |
| CCT7  | -0.96692 | -1.91483 | 0.05599  | 0.123489 | 0.056073 | 0.123555 |
| CCT8  | -1.82605 | -4.79315 | 2.07E-06 | 2.69E-05 | 2.27E-06 | 2.93E-05 |
| CD14  | 0.92049  | 2.610481 | 0.009268 | 0.029255 | 0.009645 | 0.03024  |
| CD163 | 2.553026 | 4.519389 | 7.48E-06 | 7.86E-05 | 7.37E-06 | 7.82E-05 |
| CD19  | -0.0062  | -0.00622 | 0.99504  | 0.996312 | 0.995024 | 0.996296 |
| CD1A  | -2.96652 | -2.91766 | 0.003659 | 0.013926 | 0.00355  | 0.013597 |
| CD1C  | -0.52102 | -0.8089  | 0.418897 | 0.55632  | 0.418203 | 0.555398 |
| CD1D  | -0.22828 | -0.38268 | 0.702095 | 0.799575 | 0.701811 | 0.799445 |
| CD2   | 1.689904 | 2.144695 | 0.03238  | 0.079098 | 0.031954 | 0.07822  |
| CD200 | 1.172141 | 1.960534 | 0.050397 | 0.113063 | 0.050161 | 0.112587 |
| CD22  | 2.251531 | 3.616223 | 0.000324 | 0.001876 | 0.000318 | 0.001857 |
| CD226 | 2.800495 | 3.564387 | 0.000394 | 0.002198 | 0.000381 | 0.002151 |
| CD2AP | 2.295663 | 4.393011 | 1.32E-05 | 0.000127 | 1.32E-05 | 0.000127 |
| CD33  | -0.30941 | -0.48425 | 0.628384 | 0.741082 | 0.627888 | 0.740545 |
| CD34  | 3.82754  | 6.824934 | 2.16E-11 | 1.41E-09 | 2.10E-11 | 1.42E-09 |
| CD36  | 3.4257   | 4.735343 | 2.73E-06 | 3.36E-05 | 2.60E-06 | 3.24E-05 |
| CD37  | -0.26787 | -0.36225 | 0.717293 | 0.810916 | 0.716697 | 0.810439 |
| CD38  | -1.09488 | -1.47763 | 0.140033 | 0.247985 | 0.139157 | 0.24684  |
| CD3D  | -3.0562  | -5.37648 | 1.09E-07 | 2.13E-06 | 1.07E-07 | 2.10E-06 |
| CD3E  | 0.040043 | 0.075502 | 0.939841 | 0.964676 | 0.939835 | 0.96467  |
| CD3G  | -2.15988 | -2.86485 | 0.004319 | 0.015796 | 0.00423  | 0.015569 |
| CD4   | 0.899613 | 2.019934 | 0.043836 | 0.100846 | 0.044192 | 0.101073 |
| CD40  | 1.501001 | 2.4643   | 0.014008 | 0.040579 | 0.013898 | 0.040345 |
| CD44  | 0.506012 | 0.684344 | 0.494023 | 0.625969 | 0.493073 | 0.624984 |
| CD48  | 0.405835 | 0.550502 | 0.582181 | 0.702142 | 0.581355 | 0.701147 |
| CD5   | 1.562455 | 3.343824 | 0.000878 | 0.004259 | 0.00089  | 0.004319 |
| CD53  | -0.24473 | -0.52163 | 0.602124 | 0.719914 | 0.602524 | 0.720026 |
| CD58  | 2.360428 | 3.258047 | 0.001185 | 0.005484 | 0.001157 | 0.005368 |
| CD59  | 0.976613 | 1.281263 | 0.200598 | 0.324659 | 0.199548 | 0.323183 |
| CD6   | 0.417698 | 0.645643 | 0.518758 | 0.647759 | 0.518124 | 0.647311 |

|          |          |          |          |          |          |          |
|----------|----------|----------|----------|----------|----------|----------|
| CD68     | -0.35477 | -0.59031 | 0.555208 | 0.68026  | 0.554791 | 0.679749 |
| CD79B    | -2.06586 | -3.41173 | 0.000689 | 0.003498 | 0.000679 | 0.003467 |
| CD80     | 1.776274 | 3.396286 | 0.000728 | 0.003661 | 0.000728 | 0.003657 |
| CD81     | 0.386706 | 1.188408 | 0.235144 | 0.368885 | 0.238426 | 0.37254  |
| CD83     | -0.86374 | -1.54458 | 0.122977 | 0.224987 | 0.122776 | 0.224296 |
| CD86     | 0.769299 | 1.874802 | 0.061307 | 0.131812 | 0.062028 | 0.132938 |
| CD8A     | 1.474794 | 2.535014 | 0.011498 | 0.034575 | 0.011428 | 0.034475 |
| CD9      | 0.205244 | 0.25196  | 0.801159 | 0.869618 | 0.800654 | 0.869306 |
| CD97     | 1.992348 | 3.525964 | 0.000454 | 0.002468 | 0.00045  | 0.002453 |
| CD99     | -0.2388  | -0.70446 | 0.481418 | 0.614521 | 0.484097 | 0.616733 |
| CD99L2   | -0.79761 | -2.53295 | 0.011565 | 0.034754 | 0.01222  | 0.03635  |
| CDA      | -0.26234 | -0.31088 | 0.755999 | 0.836637 | 0.755356 | 0.836122 |
| CDC14A   | -1.13356 | -1.33878 | 0.18115  | 0.301275 | 0.179959 | 0.299932 |
| CDC16    | -0.4118  | -1.03371 | 0.301691 | 0.442971 | 0.303251 | 0.444954 |
| CDC23    | 0.803767 | 1.330387 | 0.183898 | 0.304767 | 0.183419 | 0.303974 |
| CDC25C   | -0.7615  | -0.98902 | 0.323052 | 0.464387 | 0.321903 | 0.4639   |
| CDC34    | 0.453472 | 0.917003 | 0.359511 | 0.499468 | 0.359775 | 0.500107 |
| CDC37    | -0.64759 | -2.66328 | 0.007947 | 0.026101 | 0.00898  | 0.028557 |
| CDC37L1  | 0.185932 | 0.462991 | 0.643539 | 0.753334 | 0.644569 | 0.753789 |
| CDC40    | 0.823245 | 1.633793 | 0.102829 | 0.195587 | 0.102952 | 0.195585 |
| CDC42    | 1.529451 | 3.028196 | 0.002566 | 0.010425 | 0.002574 | 0.010421 |
| CDC42BPA | 0.38783  | 0.749173 | 0.454047 | 0.589672 | 0.4541   | 0.589838 |
| CDC42BPB | -0.38262 | -0.42465 | 0.671242 | 0.77648  | 0.670335 | 0.775903 |
| CDC42EP1 | 0.998351 | 2.447972 | 0.014653 | 0.041992 | 0.014937 | 0.042624 |
| CDC42EP3 | -1.66062 | -2.13315 | 0.033319 | 0.081138 | 0.032893 | 0.080226 |
| CDC5L    | -0.29661 | -0.7017  | 0.483141 | 0.616385 | 0.484181 | 0.616733 |
| CDC6     | -0.28034 | -0.33186 | 0.740108 | 0.827822 | 0.739426 | 0.827175 |
| CDCA3    | -0.41817 | -0.79802 | 0.425174 | 0.562431 | 0.425177 | 0.562436 |
| CDCA4    | -0.19454 | -0.31742 | 0.751036 | 0.833696 | 0.750751 | 0.833419 |
| CDH1     | 1.995509 | 2.452225 | 0.014482 | 0.041631 | 0.014229 | 0.041104 |
| CDH13    | 2.114353 | 2.995189 | 0.002856 | 0.011348 | 0.002801 | 0.011176 |
| CDH15    | 2.263802 | 2.191497 | 0.028801 | 0.071773 | 0.028278 | 0.070581 |
| CDH16    | 0.9512   | 0.968637 | 0.333118 | 0.474441 | 0.331587 | 0.472833 |
| CDH17    | -0.98191 | -0.96652 | 0.334173 | 0.475367 | 0.332602 | 0.473993 |
| CDH3     | 2.264325 | 2.878235 | 0.004142 | 0.015292 | 0.00405  | 0.015012 |
| CDK2     | -2.52658 | -5.31659 | 1.50E-07 | 2.76E-06 | 1.53E-07 | 2.81E-06 |
| CDK3     | 0.30032  | 0.317495 | 0.750979 | 0.833696 | 0.750239 | 0.833402 |
| CDK4     | 1.879096 | 3.281205 | 0.001094 | 0.0051   | 0.001084 | 0.005072 |
| CDK5     | -0.43259 | -0.56062 | 0.575263 | 0.696417 | 0.574353 | 0.695557 |
| CDK5RAP1 | -0.46479 | -0.68937 | 0.490859 | 0.622682 | 0.490101 | 0.621721 |
| CDK6     | 0.41967  | 0.636018 | 0.525008 | 0.653999 | 0.524333 | 0.65365  |

|         |          |          |          |          |          |          |
|---------|----------|----------|----------|----------|----------|----------|
| CDKL5   | 1.333052 | 1.571254 | 0.116653 | 0.215938 | 0.115653 | 0.214586 |
| CDKN1A  | 1.595126 | 2.71647  | 0.006789 | 0.022923 | 0.006739 | 0.022769 |
| CDKN1B  | 0.57115  | 0.986459 | 0.324307 | 0.465134 | 0.323923 | 0.46515  |
| CDKN1C  | 1.080244 | 1.310701 | 0.190462 | 0.312015 | 0.189294 | 0.310752 |
| CDKN2A  | -2.271   | -2.42065 | 0.01579  | 0.044545 | 0.015473 | 0.043862 |
| CDKN2C  | 2.961014 | 4.895011 | 1.27E-06 | 1.80E-05 | 1.23E-06 | 1.77E-05 |
| CDKN2D  | -2.14991 | -2.46366 | 0.014033 | 0.040588 | 0.013763 | 0.040028 |
| CDKN3   | 1.422136 | 2.791698 | 0.005411 | 0.019063 | 0.005422 | 0.019102 |
| CDO1    | -0.02062 | -0.04221 | 0.966347 | 0.979899 | 0.966369 | 0.979922 |
| CDR2    | -0.90795 | -1.30917 | 0.190981 | 0.312262 | 0.19014  | 0.311488 |
| CDS1    | 0.898986 | 2.652654 | 0.008198 | 0.026684 | 0.008594 | 0.027608 |
| CDS2    | -5.15978 | -4.84923 | 1.58E-06 | 2.15E-05 | 1.46E-06 | 2.03E-05 |
| CDX1    | -3.25665 | -3.28936 | 0.001063 | 0.004997 | 0.001024 | 0.004844 |
| CDX2    | -0.51831 | -0.67362 | 0.500814 | 0.631182 | 0.499798 | 0.630468 |
| CDYL    | 2.009122 | 1.983951 | 0.047718 | 0.108032 | 0.046999 | 0.106456 |
| CEACAM1 | -1.56743 | -1.86313 | 0.062934 | 0.134342 | 0.062222 | 0.13318  |
| CEACAM5 | 3.084201 | 3.216816 | 0.001366 | 0.006168 | 0.00132  | 0.005981 |
| CEACAM7 | -0.16513 | -0.1537  | 0.877902 | 0.924073 | 0.877492 | 0.923883 |
| CEBPG   | -0.45644 | -0.96782 | 0.333525 | 0.474877 | 0.334029 | 0.475306 |
| CECR6   | 1.106169 | 1.694918 | 0.090612 | 0.1773   | 0.090105 | 0.176456 |
| CELSR2  | -1.57786 | -2.66045 | 0.008013 | 0.026263 | 0.007951 | 0.026047 |
| CELSR3  | -0.16704 | -0.31892 | 0.749896 | 0.833218 | 0.749899 | 0.833342 |
| CENPA   | -1.16727 | -3.27844 | 0.001104 | 0.005144 | 0.00117  | 0.005424 |
| CENPB   | 0.950009 | 3.008465 | 0.002736 | 0.010954 | 0.002947 | 0.01167  |
| CENPF   | 1.773531 | 1.883187 | 0.06016  | 0.129882 | 0.059379 | 0.128507 |
| CEPT1   | 1.956974 | 7.184978 | 2.01E-12 | 1.85E-10 | 3.51E-12 | 3.11E-10 |
| CERK    | 0.148226 | 0.223812 | 0.82298  | 0.88452  | 0.822693 | 0.884212 |
| CETN2   | -1.1887  | -2.03334 | 0.04246  | 0.098064 | 0.042279 | 0.097648 |
| CETP    | -2.95381 | -6.72145 | 4.20E-11 | 2.53E-09 | 4.52E-11 | 2.73E-09 |
| CFDP1   | -0.65969 | -1.90199 | 0.057653 | 0.125974 | 0.059069 | 0.128055 |
| CFH     | 2.551512 | 4.377403 | 1.42E-05 | 0.000134 | 1.39E-05 | 0.000132 |
| CFLAR   | 0.776309 | 2.693427 | 0.007271 | 0.024287 | 0.007874 | 0.025862 |
| CGGBP1  | 1.379614 | 2.56385  | 0.010595 | 0.032504 | 0.010576 | 0.032468 |
| CGNL1   | 2.307618 | 2.956995 | 0.003229 | 0.012532 | 0.003155 | 0.012305 |
| CH25H   | 2.283574 | 2.879814 | 0.004122 | 0.015229 | 0.004029 | 0.014976 |
| CHAD    | 1.22305  | 1.971441 | 0.049134 | 0.110766 | 0.048847 | 0.110214 |
| CHAF1A  | 0.725759 | 2.475389 | 0.013585 | 0.039609 | 0.014502 | 0.041714 |
| CHAF1B  | 2.765643 | 4.40191  | 1.27E-05 | 0.000123 | 1.24E-05 | 0.000121 |
| CHCHD1  | 0.862656 | 1.105519 | 0.269379 | 0.407625 | 0.268217 | 0.406649 |
| CHCHD5  | -2.02731 | -2.09015 | 0.037026 | 0.088156 | 0.036435 | 0.086927 |
| CHD2    | 0.768688 | 1.105981 | 0.26918  | 0.407454 | 0.268267 | 0.406649 |

|         |          |          |          |          |          |          |
|---------|----------|----------|----------|----------|----------|----------|
| CHD3    | 0.515458 | 1.813406 | 0.07027  | 0.145751 | 0.073245 | 0.150393 |
| CHD4    | 0.228485 | 0.54452  | 0.586287 | 0.705639 | 0.587214 | 0.706369 |
| CHD6    | 1.137625 | 2.692691 | 0.007286 | 0.024323 | 0.007425 | 0.024696 |
| CHD7    | -0.73722 | -1.23227 | 0.218333 | 0.347499 | 0.21786  | 0.346747 |
| CHEK1   | -2.11399 | -5.06758 | 5.38E-07 | 8.51E-06 | 5.73E-07 | 9.03E-06 |
| CHFR    | 0.611866 | 0.773271 | 0.439668 | 0.575289 | 0.438532 | 0.574122 |
| CHGA    | -0.0422  | -0.0394  | 0.968588 | 0.979947 | 0.968482 | 0.979949 |
| CHKA    | 1.10453  | 2.185664 | 0.029227 | 0.072643 | 0.02928  | 0.072753 |
| CHN1    | 1.02879  | 1.579698 | 0.114705 | 0.212752 | 0.11414  | 0.212149 |
| CHN2    | 1.77783  | 2.606708 | 0.00937  | 0.029516 | 0.009241 | 0.02917  |
| CHODL   | -0.12105 | -0.35112 | 0.725621 | 0.817454 | 0.727138 | 0.818783 |
| CHORDC1 | -0.3239  | -0.95419 | 0.340372 | 0.481852 | 0.34331  | 0.485865 |
| CHP     | 2.032077 | 6.428601 | 2.63E-10 | 1.09E-08 | 3.54E-10 | 1.42E-08 |
| CHPT1   | -0.60371 | -1.14438 | 0.252925 | 0.389626 | 0.2529   | 0.389618 |
| CHRD2   | -0.87265 | -0.96273 | 0.336072 | 0.477491 | 0.334648 | 0.475755 |
| CHRNA10 | 0.34879  | 0.742157 | 0.458284 | 0.594517 | 0.45877  | 0.594819 |
| CHST10  | 2.116995 | 2.181342 | 0.029547 | 0.073321 | 0.029039 | 0.072213 |
| CHST13  | 4.32742  | 4.660177 | 3.90E-06 | 4.57E-05 | 3.64E-06 | 4.32E-05 |
| CIB1    | 0.120659 | 0.407444 | 0.683827 | 0.786586 | 0.686614 | 0.788825 |
| CIB2    | 0.754773 | 1.514768 | 0.13036  | 0.234747 | 0.13054  | 0.235169 |
| CILP    | -1.33832 | -1.83586 | 0.066874 | 0.140254 | 0.066292 | 0.139281 |
| CIRBP   | -2.50911 | -6.56482 | 1.13E-10 | 5.71E-09 | 1.32E-10 | 6.59E-09 |
| CIT     | -0.33407 | -0.82386 | 0.410348 | 0.548064 | 0.411734 | 0.549692 |
| CITED2  | -2.82845 | -4.53147 | 7.08E-06 | 7.54E-05 | 6.88E-06 | 7.40E-05 |
| CIZ1    | -0.05694 | -0.09259 | 0.92626  | 0.955709 | 0.926172 | 0.955655 |
| CKAP2   | 0.110729 | 0.254768 | 0.79899  | 0.868266 | 0.799386 | 0.868739 |
| CKAP4   | 2.130504 | 4.786164 | 2.14E-06 | 2.77E-05 | 2.23E-06 | 2.89E-05 |
| CKB     | 1.869767 | 2.447267 | 0.014681 | 0.042048 | 0.014449 | 0.041613 |
| CKLF    | 1.307297 | 2.10332  | 0.035855 | 0.085673 | 0.035618 | 0.085193 |
| CKS1B   | -2.92964 | -4.0595  | 5.57E-05 | 0.000425 | 5.37E-05 | 0.000412 |
| CKS2    | 1.88464  | 2.135579 | 0.033119 | 0.080711 | 0.032618 | 0.07968  |
| CLASP1  | 1.706566 | 2.14695  | 0.032199 | 0.078738 | 0.031769 | 0.077848 |
| CLCN2   | 0.969096 | 2.494323 | 0.012889 | 0.037837 | 0.013214 | 0.038744 |
| CLCN3   | 3.053642 | 6.261659 | 7.28E-10 | 2.61E-08 | 7.43E-10 | 2.69E-08 |
| CLCN4   | -0.56531 | -0.59915 | 0.549301 | 0.67443  | 0.548078 | 0.673173 |
| CLCN5   | 2.172997 | 2.372221 | 0.017997 | 0.049669 | 0.017656 | 0.04893  |
| CLCN6   | -2.30775 | -4.97714 | 8.45E-07 | 1.29E-05 | 8.69E-07 | 1.32E-05 |
| CLCN7   | 1.299377 | 4.547872 | 6.56E-06 | 7.12E-05 | 8.12E-06 | 8.42E-05 |
| CLDN1   | 0.185345 | 0.182525 | 0.855233 | 0.908588 | 0.854767 | 0.908299 |
| CLDN2   | 0.188359 | 0.169189 | 0.865705 | 0.914751 | 0.865246 | 0.914278 |
| CLDN3   | -1.31588 | -1.79419 | 0.073289 | 0.150681 | 0.072667 | 0.149612 |

|         |          |          |          |          |          |          |
|---------|----------|----------|----------|----------|----------|----------|
| CLDN4   | 1.514834 | 2.997698 | 0.002833 | 0.011266 | 0.002842 | 0.011319 |
| CLDN7   | -1.73695 | -1.5363  | 0.124993 | 0.227652 | 0.123683 | 0.225576 |
| CLIC1   | -1.2838  | -4.81631 | 1.86E-06 | 2.45E-05 | 2.47E-06 | 3.12E-05 |
| CLIC2   | 0.429938 | 0.912282 | 0.361988 | 0.501336 | 0.362492 | 0.501667 |
| CLK2    | 0.933608 | 1.944484 | 0.052306 | 0.116787 | 0.052503 | 0.117038 |
| CLN3    | 0.794193 | 1.422017 | 0.155543 | 0.268275 | 0.155325 | 0.268097 |
| CLN5    | 1.404467 | 1.583305 | 0.113881 | 0.211473 | 0.112841 | 0.210123 |
| CLNS1A  | -3.19556 | -4.37911 | 1.41E-05 | 0.000133 | 1.35E-05 | 0.000129 |
| CLOCK   | 0.036426 | 0.084538 | 0.932657 | 0.960239 | 0.9328   | 0.960386 |
| CLPP    | -0.87917 | -1.14296 | 0.253511 | 0.3904   | 0.252386 | 0.38905  |
| CLPX    | -0.91518 | -1.64909 | 0.099654 | 0.190628 | 0.099492 | 0.19024  |
| CLSPN   | -0.56964 | -1.29565 | 0.195595 | 0.317875 | 0.196426 | 0.319077 |
| CLSTN1  | 1.708857 | 3.380804 | 0.00077  | 0.003821 | 0.000773 | 0.003847 |
| CLSTN2  | 1.848543 | 2.201605 | 0.028074 | 0.070258 | 0.027651 | 0.069239 |
| CLTA    | 0.124401 | 0.225018 | 0.822042 | 0.883916 | 0.821965 | 0.883776 |
| CLTB    | 0.428328 | 1.038879 | 0.299281 | 0.441085 | 0.300595 | 0.442274 |
| CLTC    | -0.48613 | -1.63327 | 0.102939 | 0.195686 | 0.106126 | 0.200237 |
| CMAS    | 0.481354 | 0.825522 | 0.409405 | 0.547506 | 0.409009 | 0.546741 |
| CMIP    | -0.75999 | -1.1333  | 0.257542 | 0.395166 | 0.256724 | 0.394057 |
| CNDP2   | -1.71091 | -3.32853 | 0.000927 | 0.004458 | 0.000928 | 0.004438 |
| CNGB1   | -0.29964 | -0.71435 | 0.475287 | 0.610007 | 0.476382 | 0.610748 |
| CNIH    | -0.34258 | -0.67082 | 0.502595 | 0.63228  | 0.502699 | 0.632579 |
| CNKSR1  | 0.452829 | 0.559938 | 0.575731 | 0.696417 | 0.574751 | 0.695681 |
| CNN1    | 0.746984 | 1.111534 | 0.266785 | 0.405527 | 0.265957 | 0.404269 |
| CNN2    | 1.054041 | 2.427546 | 0.015496 | 0.043899 | 0.015702 | 0.044351 |
| CNN3    | -0.02117 | -0.03488 | 0.972187 | 0.982024 | 0.972156 | 0.982028 |
| CNNM4   | 0.18014  | 0.2015   | 0.840376 | 0.8975   | 0.839919 | 0.897394 |
| CNOT1   | -0.2744  | -0.7094  | 0.478353 | 0.612438 | 0.479975 | 0.613552 |
| CNOT3   | 1.838935 | 4.208439 | 2.97E-05 | 0.000251 | 3.07E-05 | 0.000258 |
| CNOT6L  | 0.435311 | 0.50555  | 0.613359 | 0.72945  | 0.61237  | 0.728458 |
| CNOT8   | -2.17066 | -4.53008 | 7.12E-06 | 7.55E-05 | 7.24E-06 | 7.70E-05 |
| CNP     | -0.83771 | -1.4162  | 0.157238 | 0.270208 | 0.156844 | 0.269729 |
| CNTFR   | 1.798369 | 2.624624 | 0.008896 | 0.028386 | 0.008771 | 0.028062 |
| CNTN4   | 1.56403  | 3.407533 | 0.0007   | 0.003547 | 0.000711 | 0.003596 |
| CNTNAP1 | -1.39572 | -2.86617 | 0.004301 | 0.015743 | 0.004327 | 0.015839 |
| COASY   | -0.81836 | -1.83169 | 0.067495 | 0.141304 | 0.067949 | 0.141875 |
| COBL    | 1.606612 | 3.43146  | 0.000642 | 0.003282 | 0.00065  | 0.00333  |
| COBL1   | 0.541641 | 0.943497 | 0.345808 | 0.487112 | 0.345455 | 0.487348 |
| COG2    | -0.7016  | -1.77206 | 0.076893 | 0.156449 | 0.077873 | 0.15797  |
| COG5    | -0.48227 | -1.22952 | 0.21936  | 0.348729 | 0.220957 | 0.350725 |
| COL11A2 | 0.703529 | 1.506694 | 0.132417 | 0.237724 | 0.132861 | 0.238794 |



|          |          |          |          |          |          |          |
|----------|----------|----------|----------|----------|----------|----------|
| COL13A1  | 2.148152 | 3.379498 | 0.000773 | 0.003835 | 0.00076  | 0.003788 |
| COL15A1  | 1.767984 | 3.337525 | 0.000898 | 0.004337 | 0.000896 | 0.004341 |
| COL16A1  | 0.105208 | 0.240442 | 0.81007  | 0.875852 | 0.810429 | 0.87624  |
| COL18A1  | 1.859281 | 4.621748 | 4.66E-06 | 5.31E-05 | 4.98E-06 | 5.61E-05 |
| COL1A2   | 3.455435 | 6.134586 | 1.55E-09 | 5.22E-08 | 1.51E-09 | 5.08E-08 |
| COL4A1   | 1.979297 | 3.954242 | 8.60E-05 | 0.00061  | 8.65E-05 | 0.000611 |
| COL4A2   | 0.852189 | 2.121989 | 0.034249 | 0.082676 | 0.034806 | 0.083463 |
| COL4A3   | 2.521011 | 3.391424 | 0.000741 | 0.003706 | 0.000721 | 0.003636 |
| COL4A3BP | 1.318782 | 3.177499 | 0.001562 | 0.006868 | 0.001606 | 0.007038 |
| COL4A4   | 1.391104 | 2.166317 | 0.030681 | 0.075498 | 0.030435 | 0.07493  |
| COL4A5   | -1.10185 | -1.58344 | 0.113849 | 0.211473 | 0.113158 | 0.21063  |
| COL4A6   | 0.261825 | 0.428124 | 0.668715 | 0.77451  | 0.668351 | 0.774279 |
| COL5A3   | 2.786185 | 3.992218 | 7.36E-05 | 0.000538 | 7.12E-05 | 0.000524 |
| COL6A1   | 0.92415  | 2.381492 | 0.017555 | 0.048763 | 0.017965 | 0.049606 |
| COL6A2   | 0.086602 | 0.167757 | 0.866831 | 0.915735 | 0.86685  | 0.915755 |
| COL7A1   | 2.254711 | 2.369996 | 0.018105 | 0.049849 | 0.01775  | 0.049161 |
| COL8A1   | 0.831317 | 1.446611 | 0.14853  | 0.259224 | 0.148228 | 0.258735 |
| COL9A1   | 0.141691 | 0.259726 | 0.795164 | 0.865711 | 0.795098 | 0.865438 |
| COL9A2   | -1.07584 | -1.05675 | 0.291054 | 0.433582 | 0.289483 | 0.431653 |
| COL9A3   | 0.871754 | 1.397323 | 0.162835 | 0.277693 | 0.162288 | 0.277063 |
| COLEC10  | -0.73765 | -1.36485 | 0.172814 | 0.290808 | 0.172701 | 0.290722 |
| COMMD10  | -0.93789 | -1.8263  | 0.068304 | 0.1423   | 0.068354 | 0.14234  |
| COMMD3   | -4.05961 | -4.22066 | 2.81E-05 | 0.00024  | 2.66E-05 | 0.000228 |
| COMP     | 1.581175 | 1.481108 | 0.139105 | 0.246807 | 0.137778 | 0.244985 |
| COMT     | -0.49488 | -0.95947 | 0.337708 | 0.479381 | 0.33778  | 0.479216 |
| COPB2    | 2.592315 | 8.265353 | 9.02E-16 | 1.46E-13 | 1.45E-15 | 2.34E-13 |
| COPG2    | 1.356932 | 1.860852 | 0.063256 | 0.13487  | 0.062692 | 0.134045 |
| COPS3    | 1.672053 | 2.00181  | 0.045756 | 0.104244 | 0.045176 | 0.103065 |
| COPS4    | -0.03096 | -0.04491 | 0.964192 | 0.978347 | 0.964125 | 0.978279 |
| COPS5    | 1.086966 | 2.241538 | 0.025357 | 0.064842 | 0.025464 | 0.065116 |
| COPS6    | -0.81506 | -0.86319 | 0.38838  | 0.527568 | 0.386926 | 0.526049 |
| COPS7A   | 0.102444 | 0.336234 | 0.736812 | 0.826496 | 0.738983 | 0.827175 |
| COPS8    | -0.56484 | -1.64294 | 0.100921 | 0.192348 | 0.102911 | 0.195585 |
| COPZ1    | 0.252951 | 0.292998 | 0.769625 | 0.847627 | 0.768999 | 0.847108 |
| COPZ2    | -1.79761 | -2.71053 | 0.00691  | 0.023238 | 0.006817 | 0.023003 |
| COQ7     | -1.79901 | -2.0173  | 0.04411  | 0.101081 | 0.043499 | 0.100119 |
| CORO1A   | -3.60653 | -4.91153 | 1.17E-06 | 1.69E-05 | 1.11E-06 | 1.62E-05 |
| CORO1C   | -1.99809 | -4.58782 | 5.46E-06 | 6.05E-05 | 5.69E-06 | 6.30E-05 |
| CORO2A   | 0.582916 | 0.852998 | 0.394002 | 0.532895 | 0.393141 | 0.531578 |
| COX11    | 1.014208 | 2.059577 | 0.039871 | 0.093464 | 0.039986 | 0.093827 |
| COX15    | 0.3803   | 0.62303  | 0.533502 | 0.660727 | 0.533029 | 0.660315 |

|         |          |          |          |          |          |          |
|---------|----------|----------|----------|----------|----------|----------|
| COX17   | -3.89647 | -4.43086 | 1.12E-05 | 0.000111 | 1.05E-05 | 0.000106 |
| COX5A   | -0.61724 | -1.31157 | 0.190168 | 0.311641 | 0.190638 | 0.311978 |
| COX5B   | 0.215174 | 0.72123  | 0.47105  | 0.605966 | 0.475098 | 0.609766 |
| COX6A1  | 1.297836 | 4.177251 | 3.39E-05 | 0.000281 | 3.91E-05 | 0.000317 |
| COX6B1  | -0.60797 | -1.50502 | 0.132847 | 0.238404 | 0.134015 | 0.240501 |
| COX6C   | 0.041011 | 0.120228 | 0.904343 | 0.942232 | 0.904911 | 0.942825 |
| COX7A1  | -0.95673 | -1.3453  | 0.179038 | 0.298714 | 0.17816  | 0.297672 |
| COX7A2  | -0.38927 | -1.10909 | 0.267838 | 0.406456 | 0.270428 | 0.40908  |
| COX7C   | 1.685338 | 3.549829 | 0.000416 | 0.002294 | 0.000421 | 0.002322 |
| COX8A   | 0.233832 | 0.371388 | 0.71048  | 0.805222 | 0.710106 | 0.805186 |
| CP      | -3.94752 | -3.77096 | 0.000179 | 0.001131 | 0.00017  | 0.001082 |
| CPA3    | 2.10776  | 2.562225 | 0.010644 | 0.032613 | 0.01044  | 0.032175 |
| CPD     | -0.03396 | -0.05255 | 0.95811  | 0.975293 | 0.958047 | 0.975335 |
| CPM     | -1.40067 | -2.08289 | 0.037686 | 0.089276 | 0.037354 | 0.088623 |
| CPNE3   | 0.52961  | 0.790523 | 0.429536 | 0.566447 | 0.428745 | 0.565563 |
| CPNE6   | 0.200213 | 0.212407 | 0.831862 | 0.891416 | 0.831355 | 0.891076 |
| CPNE8   | -0.58758 | -1.32469 | 0.185779 | 0.307019 | 0.186549 | 0.307211 |
| CPS1    | -2.83962 | -2.24039 | 0.025432 | 0.064997 | 0.024896 | 0.063766 |
| CPSF1   | 0.730985 | 2.222571 | 0.026618 | 0.067224 | 0.027651 | 0.069239 |
| CPSF2   | 0.009589 | 0.022126 | 0.982355 | 0.987819 | 0.982391 | 0.987855 |
| CPSF4   | 0.644831 | 1.922475 | 0.055021 | 0.121636 | 0.056567 | 0.124277 |
| CPSF6   | 0.862515 | 1.643179 | 0.100872 | 0.192331 | 0.100866 | 0.192399 |
| CPT1A   | 1.023687 | 2.291567 | 0.022277 | 0.058363 | 0.022498 | 0.058942 |
| CPVL    | 1.077048 | 1.454791 | 0.146252 | 0.256295 | 0.145362 | 0.255117 |
| CRABP2  | 0.118144 | 0.138734 | 0.889707 | 0.931881 | 0.889405 | 0.931693 |
| CRADD   | -0.23094 | -0.40305 | 0.687057 | 0.788949 | 0.686845 | 0.788898 |
| CREB3L4 | -1.27447 | -1.79675 | 0.072881 | 0.149973 | 0.072306 | 0.149116 |
| CREB5   | 0.859766 | 1.468394 | 0.142523 | 0.251259 | 0.142172 | 0.251018 |
| CREBBP  | -0.94833 | -2.41352 | 0.016099 | 0.045281 | 0.016463 | 0.046112 |
| CREG1   | -2.97235 | -5.28429 | 1.77E-07 | 3.18E-06 | 1.74E-07 | 3.12E-06 |
| CRELD1  | -0.20554 | -0.31686 | 0.751458 | 0.833941 | 0.75109  | 0.833419 |
| CRHBP   | 2.875827 | 6.681965 | 5.41E-11 | 3.10E-09 | 5.88E-11 | 3.37E-09 |
| CRHR1   | 1.640822 | 5.475378 | 6.43E-08 | 1.33E-06 | 8.35E-08 | 1.68E-06 |
| CRIP1   | 0.504332 | 0.88302  | 0.377581 | 0.516631 | 0.37725  | 0.516179 |
| CRIP2   | 0.288073 | 0.396416 | 0.691939 | 0.793419 | 0.691319 | 0.792875 |
| CRIPT   | 0.086137 | 0.114873 | 0.908584 | 0.944767 | 0.908378 | 0.944685 |
| CRISP1  | 1.653962 | 4.504377 | 8.01E-06 | 8.32E-05 | 8.78E-06 | 8.99E-05 |
| CRTAP   | -2.91265 | -5.74871 | 1.43E-08 | 3.55E-07 | 1.44E-08 | 3.55E-07 |
| CRY1    | 0.211813 | 0.505002 | 0.613743 | 0.729538 | 0.614623 | 0.730584 |
| CRYAB   | -0.20325 | -0.2649  | 0.791176 | 0.862767 | 0.790694 | 0.862442 |
| CRYBA4  | 4.188891 | 4.825875 | 1.77E-06 | 2.36E-05 | 1.66E-06 | 2.25E-05 |

|         |          |          |          |          |          |          |
|---------|----------|----------|----------|----------|----------|----------|
| CRYBB1  | -0.46948 | -0.5594  | 0.5761   | 0.696417 | 0.575069 | 0.695887 |
| CRYM    | 2.311419 | 4.028885 | 6.33E-05 | 0.000471 | 6.24E-05 | 0.00047  |
| CRYZL1  | 0.158624 | 0.171669 | 0.863756 | 0.913925 | 0.86335  | 0.913541 |
| CS      | 0.046644 | 0.120706 | 0.903964 | 0.942047 | 0.904318 | 0.942416 |
| CSAD    | 3.66564  | 4.623358 | 4.63E-06 | 5.28E-05 | 4.38E-06 | 5.01E-05 |
| CSDA    | -3.785   | -6.0253  | 2.95E-09 | 9.37E-08 | 2.80E-09 | 8.96E-08 |
| CSE1L   | 0.958239 | 1.61853  | 0.106076 | 0.200303 | 0.105741 | 0.199753 |
| CSF1R   | 2.177719 | 5.591882 | 3.42E-08 | 7.47E-07 | 3.80E-08 | 8.31E-07 |
| CSF2    | 1.912031 | 2.800868 | 0.005261 | 0.018635 | 0.005179 | 0.018371 |
| CSF2RB  | 1.855911 | 2.299725 | 0.021807 | 0.057604 | 0.021471 | 0.057014 |
| CSF3R   | 0.655151 | 1.376574 | 0.169159 | 0.285877 | 0.16956  | 0.286494 |
| CSNK1A1 | 1.196938 | 2.010978 | 0.044776 | 0.102209 | 0.044563 | 0.101821 |
| CSNK1G3 | 0.320701 | 0.424834 | 0.67111  | 0.77648  | 0.670401 | 0.775903 |
| CSNK2A1 | 0.695985 | 1.022935 | 0.306752 | 0.448162 | 0.305883 | 0.447309 |
| CSNK2A2 | 0.112905 | 0.152344 | 0.878967 | 0.924607 | 0.878702 | 0.924377 |
| CSNK2B  | -0.46817 | -1.11559 | 0.265045 | 0.403797 | 0.266227 | 0.404547 |
| CSPG4   | -3.75249 | -9.12821 | 1.06E-18 | 4.15E-16 | 1.27E-18 | 5.44E-16 |
| CSPG5   | -1.67084 | -2.25839 | 0.024281 | 0.062527 | 0.023968 | 0.061877 |
| CSRP1   | -0.14026 | -0.4052  | 0.685475 | 0.787902 | 0.687166 | 0.789074 |
| CSRP2   | 0.805393 | 2.017893 | 0.044049 | 0.101034 | 0.044724 | 0.102139 |
| CSRP2BP | 1.133398 | 2.284715 | 0.022679 | 0.059219 | 0.022747 | 0.059494 |
| CST3    | -0.04898 | -0.1082  | 0.913873 | 0.948168 | 0.914003 | 0.948122 |
| CST7    | 3.042408 | 4.126908 | 4.20E-05 | 0.000338 | 4.04E-05 | 0.000326 |
| CSTA    | 2.864595 | 3.850883 | 0.00013  | 0.000855 | 0.000126 | 0.000833 |
| CSTF1   | 0.447306 | 0.991986 | 0.321606 | 0.463665 | 0.322358 | 0.464037 |
| CSTF2   | 0.341036 | 0.49791  | 0.61873  | 0.733611 | 0.618088 | 0.733065 |
| CSTF3   | -0.85267 | -1.77419 | 0.07654  | 0.155799 | 0.076785 | 0.15623  |
| CTBP1   | -1.12775 | -2.33362 | 0.019946 | 0.053692 | 0.020041 | 0.053916 |
| CTDP1   | 0.072361 | 0.110957 | 0.911688 | 0.946737 | 0.91155  | 0.946568 |
| CTDSP2  | -2.45085 | -5.25506 | 2.06E-07 | 3.64E-06 | 2.12E-07 | 3.75E-06 |
| CTDSPL  | -0.90472 | -1.43152 | 0.152804 | 0.264913 | 0.152238 | 0.264149 |
| CTF1    | 2.639378 | 3.497543 | 0.000504 | 0.002685 | 0.000489 | 0.002623 |
| CTGF    | 1.941409 | 3.91018  | 0.000103 | 0.000702 | 0.000104 | 0.000707 |
| CTH     | 3.163902 | 5.987053 | 3.69E-09 | 1.16E-07 | 3.66E-09 | 1.15E-07 |
| CTNNA1  | -2.42399 | -3.45543 | 0.000588 | 0.003069 | 0.000574 | 0.003003 |
| CTNNAL1 | -0.35361 | -0.61099 | 0.541441 | 0.667811 | 0.541121 | 0.667175 |
| CTNNB1  | -0.54723 | -1.58368 | 0.113796 | 0.211473 | 0.115867 | 0.214654 |
| CTNND1  | 0.214146 | 0.626615 | 0.531151 | 0.658683 | 0.53359  | 0.660836 |
| CTNS    | 0.154428 | 0.292528 | 0.769985 | 0.847627 | 0.769972 | 0.847706 |
| CTRL    | 3.785804 | 4.951976 | 9.57E-07 | 1.42E-05 | 9.02E-07 | 1.36E-05 |
| CTSC    | -1.73956 | -2.086   | 0.037402 | 0.088738 | 0.036894 | 0.08776  |

|          |          |          |          |          |          |          |
|----------|----------|----------|----------|----------|----------|----------|
| CTSD     | 0.38637  | 0.77941  | 0.436046 | 0.571824 | 0.436288 | 0.571662 |
| CTSE     | 3.03505  | 3.502725 | 0.000495 | 0.00264  | 0.000477 | 0.002565 |
| CTSF     | -1.7931  | -2.74157 | 0.006298 | 0.02162  | 0.006215 | 0.02132  |
| CTSG     | -0.71707 | -1.17726 | 0.239558 | 0.373565 | 0.23902  | 0.372973 |
| CTSH     | 1.217239 | 2.600875 | 0.009529 | 0.029936 | 0.009608 | 0.030165 |
| CTSK     | 1.068556 | 1.359221 | 0.174589 | 0.293352 | 0.17353  | 0.291908 |
| CTSL2    | 1.263344 | 2.248968 | 0.024878 | 0.063824 | 0.024794 | 0.063608 |
| CTSO     | -0.07881 | -0.11628 | 0.907469 | 0.944025 | 0.907305 | 0.944046 |
| CTSS     | -0.47304 | -0.94378 | 0.345663 | 0.487112 | 0.345865 | 0.487348 |
| CTSZ     | 2.134105 | 4.417058 | 1.19E-05 | 0.000116 | 1.20E-05 | 0.000118 |
| CTTN     | 0.60686  | 0.94391  | 0.345597 | 0.487112 | 0.344883 | 0.4873   |
| CUL1     | 0.898533 | 2.045329 | 0.04126  | 0.09581  | 0.041637 | 0.096592 |
| CUL2     | 2.382934 | 2.788675 | 0.005461 | 0.019197 | 0.005333 | 0.018816 |
| CUL4A    | -1.45187 | -3.407   | 0.000701 | 0.00355  | 0.00072  | 0.003636 |
| CUL4B    | -0.24737 | -0.48568 | 0.627371 | 0.740509 | 0.627463 | 0.740266 |
| CUL5     | 1.225138 | 2.071735 | 0.038718 | 0.091526 | 0.038533 | 0.091102 |
| CUL7     | 3.642569 | 8.113643 | 2.80E-15 | 4.25E-13 | 3.04E-15 | 4.61E-13 |
| CWF19L2  | -1.12365 | -1.55581 | 0.120283 | 0.221005 | 0.119507 | 0.219924 |
| CXADR    | -1.63148 | -2.80149 | 0.005251 | 0.018613 | 0.005213 | 0.018434 |
| CXCL1    | 3.059264 | 4.452687 | 1.01E-05 | 0.000101 | 9.74E-06 | 9.86E-05 |
| CXCL10   | 2.582553 | 2.905363 | 0.003804 | 0.014303 | 0.003703 | 0.014057 |
| CXCL12   | 1.570529 | 2.844273 | 0.004604 | 0.0167   | 0.004585 | 0.016627 |
| CXCL14   | 1.545671 | 1.999326 | 0.046025 | 0.104704 | 0.045506 | 0.103723 |
| CXCL6    | 4.063143 | 4.753881 | 2.50E-06 | 3.13E-05 | 2.35E-06 | 3.00E-05 |
| CXCR6    | 0.783433 | 0.8384   | 0.402141 | 0.5398   | 0.400712 | 0.538557 |
| CXXC1    | -0.35761 | -1.36211 | 0.173676 | 0.29205  | 0.179308 | 0.299209 |
| CYB561   | 2.046779 | 5.134506 | 3.83E-07 | 6.25E-06 | 4.16E-07 | 6.81E-06 |
| CYB561D2 | -0.16455 | -0.21324 | 0.831211 | 0.891125 | 0.830815 | 0.890904 |
| CYBA     | -1.52076 | -2.25158 | 0.024711 | 0.0635   | 0.024458 | 0.062885 |
| CYBASC3  | 1.140744 | 1.371542 | 0.170721 | 0.287903 | 0.16958  | 0.286494 |
| CYC1     | -0.56641 | -0.60707 | 0.544037 | 0.669891 | 0.542815 | 0.668562 |
| CYCS     | 1.174517 | 1.585276 | 0.113432 | 0.210974 | 0.112636 | 0.209908 |
| CYFIP2   | -0.62021 | -1.41635 | 0.157194 | 0.270208 | 0.157986 | 0.271248 |
| CYorf15B | -0.33619 | -0.44374 | 0.657388 | 0.76573  | 0.656648 | 0.765058 |
| CYP27A1  | -3.01189 | -4.30026 | 1.99E-05 | 0.00018  | 1.92E-05 | 0.000174 |
| CYP27B1  | 1.551345 | 2.301349 | 0.021715 | 0.057434 | 0.021485 | 0.057018 |
| CYP2B6   | -0.70021 | -0.93729 | 0.348988 | 0.489041 | 0.347906 | 0.487935 |
| CYP2E1   | 0.718203 | 0.749479 | 0.453863 | 0.589595 | 0.452461 | 0.588099 |
| CYP2J2   | -0.36019 | -0.33536 | 0.737471 | 0.826914 | 0.736616 | 0.826276 |
| CYP2S1   | 2.124902 | 3.206492 | 0.001415 | 0.006353 | 0.001389 | 0.006255 |
| CYP39A1  | -0.17861 | -0.32431 | 0.745814 | 0.832206 | 0.745713 | 0.831941 |

|         |          |          |          |          |          |          |
|---------|----------|----------|----------|----------|----------|----------|
| CYP3A4  | 0.072966 | 0.109822 | 0.912587 | 0.947044 | 0.912442 | 0.946893 |
| CYP3A5  | 0.844234 | 1.472278 | 0.141472 | 0.249969 | 0.141183 | 0.249552 |
| CYP4B1  | 0.037247 | 0.045357 | 0.963838 | 0.978347 | 0.963743 | 0.978269 |
| CYP4F11 | 0.389353 | 0.337252 | 0.736045 | 0.82603  | 0.73515  | 0.825115 |
| CYP4F8  | 0.494444 | 0.913873 | 0.361152 | 0.500824 | 0.361024 | 0.500683 |
| CYP51A1 | 1.089405 | 1.970507 | 0.049241 | 0.110946 | 0.049138 | 0.110715 |
| CYP7B1  | 0.658798 | 1.863955 | 0.062818 | 0.134263 | 0.064209 | 0.136161 |
| CYR61   | 2.525562 | 3.984256 | 7.60E-05 | 0.000552 | 7.43E-05 | 0.000541 |
| CYYR1   | -0.235   | -0.30537 | 0.76019  | 0.840286 | 0.759639 | 0.839874 |
| D4S234E | 2.706645 | 4.132649 | 4.10E-05 | 0.000332 | 3.98E-05 | 0.000322 |
| DAB2    | -1.5149  | -4.25945 | 2.38E-05 | 0.000208 | 2.61E-05 | 0.000225 |
| DACH1   | 0.637189 | 0.723878 | 0.469424 | 0.604629 | 0.468154 | 0.603837 |
| DACT1   | 0.19842  | 0.24915  | 0.80333  | 0.87041  | 0.802847 | 0.870245 |
| DAD1    | -0.20212 | -0.62919 | 0.529468 | 0.657679 | 0.532469 | 0.659969 |
| DAG1    | 1.34462  | 1.49428  | 0.13563  | 0.242385 | 0.134487 | 0.241072 |
| DAP     | 0.197158 | 0.431376 | 0.666351 | 0.773105 | 0.666789 | 0.773041 |
| DAPK1   | -0.77929 | -0.90477 | 0.365949 | 0.505128 | 0.364613 | 0.503755 |
| DAPK2   | -0.87566 | -0.81326 | 0.416394 | 0.554091 | 0.414818 | 0.552463 |
| DAPK3   | 1.890978 | 3.169467 | 0.001605 | 0.007044 | 0.001587 | 0.006979 |
| DAPP1   | -2.13821 | -6.38497 | 3.44E-10 | 1.34E-08 | 4.39E-10 | 1.64E-08 |
| DARS    | -0.55772 | -2.35076 | 0.019059 | 0.051779 | 0.021148 | 0.05641  |
| DAXX    | 0.218963 | 0.272964 | 0.784975 | 0.858232 | 0.784443 | 0.858019 |
| DAZAP1  | 1.275617 | 3.346805 | 0.000869 | 0.004218 | 0.00091  | 0.00438  |
| DBC1    | 2.33048  | 2.923493 | 0.003592 | 0.013715 | 0.003509 | 0.013472 |
| DBI     | 1.825607 | 3.187024 | 0.001512 | 0.006706 | 0.0015   | 0.006658 |
| DBT     | 0.563333 | 1.429139 | 0.153486 | 0.265508 | 0.154879 | 0.267524 |
| DCBLD2  | 0.878327 | 1.183169 | 0.237212 | 0.371138 | 0.236172 | 0.370127 |
| DCDC2   | 0.593426 | 0.559545 | 0.575999 | 0.696417 | 0.57472  | 0.695681 |
| DCI     | 0.04165  | 0.054552 | 0.956513 | 0.974342 | 0.956412 | 0.974238 |
| DCK     | -0.81993 | -2.89708 | 0.003904 | 0.014564 | 0.004297 | 0.015752 |
| DCLRE1C | 0.133402 | 0.271651 | 0.785984 | 0.858377 | 0.786114 | 0.858453 |
| DCP1A   | 1.202118 | 2.508205 | 0.012398 | 0.036765 | 0.012473 | 0.036938 |
| DCP2    | -2.95501 | -3.56344 | 0.000395 | 0.002203 | 0.000381 | 0.002151 |
| DCT     | 2.477753 | 4.762987 | 2.40E-06 | 3.04E-05 | 2.40E-06 | 3.06E-05 |
| DCTD    | -0.26822 | -0.50346 | 0.614827 | 0.730272 | 0.614779 | 0.730584 |
| DCTN1   | 0.066978 | 0.220163 | 0.825819 | 0.886947 | 0.827294 | 0.887939 |
| DCTN2   | 2.139057 | 6.487502 | 1.83E-10 | 8.12E-09 | 2.38E-10 | 1.04E-08 |
| DCTN6   | 1.657766 | 4.532685 | 7.04E-06 | 7.52E-05 | 7.73E-06 | 8.13E-05 |
| DCX     | 1.698354 | 2.589776 | 0.009838 | 0.030641 | 0.00972  | 0.030415 |
| DDAH1   | 0.621913 | 1.011892 | 0.311999 | 0.454273 | 0.311417 | 0.453707 |
| DDB2    | 0.033535 | 0.070674 | 0.943681 | 0.966928 | 0.943736 | 0.966985 |

|        |          |          |          |          |          |          |
|--------|----------|----------|----------|----------|----------|----------|
| DDC    | 0.759959 | 1.118496 | 0.263804 | 0.402428 | 0.26295  | 0.401124 |
| DDO    | -1.44926 | -2.66679 | 0.007865 | 0.025899 | 0.007845 | 0.025802 |
| DDR2   | 0.461744 | 0.631958 | 0.527656 | 0.656253 | 0.52677  | 0.655846 |
| DDT    | 0.748933 | 2.284701 | 0.02268  | 0.059219 | 0.023614 | 0.06115  |
| DDX1   | -0.94147 | -1.94555 | 0.052177 | 0.116667 | 0.052356 | 0.116898 |
| DDX18  | 1.90612  | 3.341227 | 0.000886 | 0.004285 | 0.000879 | 0.004274 |
| DDX20  | -0.04963 | -0.1076  | 0.914348 | 0.948358 | 0.914458 | 0.948122 |
| DDX21  | 1.134143 | 1.878077 | 0.060857 | 0.131205 | 0.060575 | 0.130717 |
| DDX23  | 0.797665 | 0.845292 | 0.398286 | 0.536855 | 0.396841 | 0.535041 |
| DDX24  | -0.08435 | -0.1029  | 0.918076 | 0.950431 | 0.917863 | 0.95021  |
| DDX28  | -0.41419 | -1.08561 | 0.278088 | 0.417944 | 0.279967 | 0.42013  |
| DDX3X  | -1.09    | -2.98903 | 0.002914 | 0.011527 | 0.003047 | 0.011988 |
| DDX51  | 0.999918 | 3.728023 | 0.000211 | 0.001312 | 0.000252 | 0.001527 |
| DDX52  | -0.98566 | -1.78339 | 0.07503  | 0.153522 | 0.074899 | 0.153188 |
| DDX55  | 1.933686 | 3.179749 | 0.00155  | 0.006829 | 0.001531 | 0.006743 |
| DDX56  | 1.539388 | 2.3921   | 0.01706  | 0.047586 | 0.016895 | 0.047125 |
| DDX58  | 0.904253 | 1.824375 | 0.068594 | 0.142652 | 0.068737 | 0.14295  |
| DDX6   | 1.480191 | 3.093551 | 0.00207  | 0.008695 | 0.002088 | 0.008763 |
| DEAF1  | -2.57837 | -3.44084 | 0.00062  | 0.003208 | 0.000603 | 0.003124 |
| DECR1  | 1.350977 | 4.023239 | 6.48E-05 | 0.000479 | 7.18E-05 | 0.000526 |
| DEDD   | 0.369412 | 0.513051 | 0.608105 | 0.724669 | 0.607359 | 0.723964 |
| DEFB1  | 2.556    | 2.593114 | 0.009744 | 0.030389 | 0.009514 | 0.029909 |
| DEK    | 0.48461  | 0.892256 | 0.372615 | 0.511923 | 0.372472 | 0.5118   |
| DEPDC5 | -1.13892 | -2.15725 | 0.031384 | 0.077066 | 0.031372 | 0.077117 |
| DEPDC6 | -0.36647 | -0.67619 | 0.499182 | 0.630297 | 0.499061 | 0.630026 |
| DERL3  | -0.37528 | -0.56463 | 0.572539 | 0.694972 | 0.571898 | 0.694194 |
| DET1   | -1.1225  | -1.69965 | 0.089717 | 0.175921 | 0.089192 | 0.175106 |
| DEXI   | 0.201262 | 0.251334 | 0.801643 | 0.869717 | 0.801151 | 0.869306 |
| DFFA   | 0.399725 | 0.935876 | 0.349715 | 0.489411 | 0.350792 | 0.490692 |
| DFNA5  | -2.25378 | -3.48388 | 0.00053  | 0.002801 | 0.00052  | 0.002745 |
| DGCR14 | -1.12349 | -2.28978 | 0.022382 | 0.058571 | 0.022464 | 0.058921 |
| DGCR2  | 1.247464 | 2.118428 | 0.034551 | 0.083233 | 0.034384 | 0.082916 |
| DGCR5  | 0.003613 | 0.005631 | 0.995509 | 0.996481 | 0.995502 | 0.996493 |
| DGKA   | 3.387087 | 6.641183 | 7.00E-11 | 3.87E-09 | 7.03E-11 | 3.84E-09 |
| DGKD   | 1.10078  | 2.230007 | 0.026117 | 0.066219 | 0.0262   | 0.066382 |
| DGKZ   | -0.41182 | -0.72476 | 0.468882 | 0.604283 | 0.468591 | 0.604053 |
| DGUOK  | 1.162834 | 3.581178 | 0.00037  | 0.002089 | 0.000406 | 0.002268 |
| DHCR7  | -0.41215 | -0.46029 | 0.645478 | 0.754663 | 0.644516 | 0.753789 |
| DHDH   | 2.189259 | 2.532194 | 0.01159  | 0.034807 | 0.011358 | 0.03433  |
| DHFR   | 1.104656 | 1.409477 | 0.159214 | 0.272806 | 0.158195 | 0.271267 |
| DHODH  | -3.95396 | -6.40865 | 2.98E-10 | 1.22E-08 | 2.82E-10 | 1.18E-08 |

|         |          |          |          |          |          |          |
|---------|----------|----------|----------|----------|----------|----------|
| DHPS    | -2.48396 | -3.25011 | 0.001218 | 0.005614 | 0.001186 | 0.005481 |
| DHRS3   | -0.76658 | -1.00437 | 0.315609 | 0.457545 | 0.314478 | 0.456362 |
| DHRS9   | 2.032791 | 2.232366 | 0.02596  | 0.065918 | 0.025521 | 0.065196 |
| DHRSX   | 2.838802 | 3.596077 | 0.00035  | 0.002    | 0.000338 | 0.001944 |
| DHX29   | 0.257637 | 0.414973 | 0.67831  | 0.782236 | 0.677926 | 0.781638 |
| DHX30   | 3.13958  | 3.817512 | 0.000149 | 0.000958 | 0.000143 | 0.000927 |
| DHX34   | -0.45045 | -0.98819 | 0.323459 | 0.464768 | 0.324149 | 0.465315 |
| DHX8    | -0.43075 | -0.96939 | 0.332741 | 0.474125 | 0.333578 | 0.475004 |
| DHX9    | -0.20977 | -0.47856 | 0.632425 | 0.744182 | 0.633072 | 0.74435  |
| DICER1  | -1.16504 | -2.28879 | 0.02244  | 0.05869  | 0.022474 | 0.058921 |
| DIO2    | 2.521111 | 3.829367 | 0.000142 | 0.000921 | 0.000138 | 0.000904 |
| DKC1    | 0.464016 | 1.38248  | 0.167341 | 0.283574 | 0.17003  | 0.287151 |
| DKK3    | -0.21806 | -0.27312 | 0.784853 | 0.858232 | 0.784324 | 0.858019 |
| DLC1    | 0.154982 | 0.506574 | 0.61264  | 0.728965 | 0.615649 | 0.731009 |
| DLD     | 1.347895 | 2.682293 | 0.007514 | 0.024888 | 0.007536 | 0.025031 |
| DLG1    | 1.301941 | 4.855773 | 1.53E-06 | 2.09E-05 | 2.04E-06 | 2.68E-05 |
| DLG3    | 2.315271 | 4.831747 | 1.72E-06 | 2.31E-05 | 1.75E-06 | 2.37E-05 |
| DLGAP4  | 1.9816   | 3.277801 | 0.001107 | 0.005151 | 0.001093 | 0.005105 |
| DLL1    | -0.08045 | -0.09896 | 0.9212   | 0.952616 | 0.920997 | 0.952406 |
| DLL3    | -1.8658  | -2.32751 | 0.020271 | 0.05438  | 0.019955 | 0.053747 |
| DLX4    | 1.96758  | 2.348368 | 0.019181 | 0.052019 | 0.018858 | 0.051324 |
| DLX5    | 0.112487 | 0.150739 | 0.880232 | 0.92535  | 0.879966 | 0.925101 |
| DMD     | 1.59841  | 2.272954 | 0.023383 | 0.060718 | 0.023111 | 0.060178 |
| DMPK    | 0.886901 | 2.09977  | 0.036168 | 0.086288 | 0.03661  | 0.08723  |
| DMTF1   | 0.757905 | 1.363374 | 0.173278 | 0.291484 | 0.173067 | 0.291234 |
| DMWD    | -0.03422 | -0.09069 | 0.927769 | 0.956267 | 0.928064 | 0.956557 |
| DNAI1   | 0.865169 | 1.408946 | 0.159371 | 0.272876 | 0.158871 | 0.272118 |
| DNAJA1  | -0.21559 | -0.52983 | 0.596428 | 0.714704 | 0.597497 | 0.715698 |
| DNAJA2  | -1.54254 | -3.39102 | 0.000742 | 0.003706 | 0.000755 | 0.003767 |
| DNAJA4  | -4.49138 | -4.26037 | 2.37E-05 | 0.000208 | 2.23E-05 | 0.000197 |
| DNAJB1  | 1.227206 | 1.444062 | 0.149245 | 0.260183 | 0.148131 | 0.258735 |
| DNAJB2  | -1.15181 | -3.36757 | 0.000807 | 0.003976 | 0.000866 | 0.004221 |
| DNAJB5  | 1.307623 | 2.201242 | 0.0281   | 0.070258 | 0.027945 | 0.069826 |
| DNAJB6  | 0.188557 | 0.344646 | 0.730482 | 0.8217   | 0.730389 | 0.821448 |
| DNAJB9  | -1.01419 | -1.0366  | 0.30034  | 0.441815 | 0.298814 | 0.44077  |
| DNAJC10 | 2.139793 | 4.991256 | 7.88E-07 | 1.21E-05 | 8.30E-07 | 1.27E-05 |
| DNAJC12 | 0.436267 | 0.484089 | 0.6285   | 0.741082 | 0.627493 | 0.740266 |
| DNAJC8  | -0.11148 | -0.39437 | 0.693445 | 0.79415  | 0.696538 | 0.796291 |
| DNAL4   | 0.5445   | 0.989386 | 0.322874 | 0.464387 | 0.322677 | 0.464205 |
| DNALI1  | 2.965849 | 3.311427 | 0.000984 | 0.004672 | 0.000951 | 0.004533 |
| DNASE1  | -0.26327 | -0.32047 | 0.748721 | 0.832502 | 0.748083 | 0.83258  |

|          |          |          |          |          |          |          |
|----------|----------|----------|----------|----------|----------|----------|
| DNASE1L1 | -1.1739  | -1.89417 | 0.058685 | 0.127458 | 0.058367 | 0.127001 |
| DNASE1L3 | 0.653751 | 0.744251 | 0.457017 | 0.593201 | 0.455733 | 0.591535 |
| DNM1     | 2.313022 | 3.510855 | 0.00048  | 0.002583 | 0.00047  | 0.002539 |
| DNM1L    | 1.276616 | 2.406852 | 0.016393 | 0.045888 | 0.01638  | 0.045908 |
| DNM3     | 1.018054 | 2.176045 | 0.029943 | 0.07403  | 0.030126 | 0.074365 |
| DNMT1    | -1.86652 | -2.52443 | 0.011846 | 0.035418 | 0.01166  | 0.035063 |
| DNMT3A   | -0.99743 | -1.35783 | 0.175029 | 0.293799 | 0.174093 | 0.292436 |
| DNMT3B   | -2.17294 | -4.33508 | 1.71E-05 | 0.000157 | 1.72E-05 | 0.000158 |
| DOCK1    | 1.175888 | 1.098404 | 0.27247  | 0.411375 | 0.270856 | 0.409464 |
| DOCK10   | 1.84201  | 2.916015 | 0.003678 | 0.013987 | 0.003631 | 0.013874 |
| DOCK11   | 2.042964 | 3.3594   | 0.000831 | 0.00408  | 0.000819 | 0.00404  |
| DOCK2    | -1.65314 | -1.93369 | 0.053622 | 0.118936 | 0.052963 | 0.117863 |
| DOCK3    | 2.060727 | 4.072872 | 5.27E-05 | 0.000406 | 5.29E-05 | 0.000407 |
| DOCK5    | 0.21386  | 0.26421  | 0.791709 | 0.863148 | 0.791186 | 0.862734 |
| DOCK8    | 1.42499  | 2.11487  | 0.034854 | 0.083707 | 0.034537 | 0.083114 |
| DOK2     | 1.2821   | 3.155916 | 0.00168  | 0.007306 | 0.001733 | 0.0075   |
| DOK3     | 4.07915  | 7.212253 | 1.67E-12 | 1.64E-10 | 1.61E-12 | 1.57E-10 |
| DOM3Z    | 1.154848 | 1.152041 | 0.249764 | 0.386022 | 0.248241 | 0.384263 |
| DPAGT1   | 0.374216 | 0.803093 | 0.42224  | 0.559451 | 0.422786 | 0.559745 |
| DPF2     | 1.082268 | 2.190295 | 0.028888 | 0.071953 | 0.028975 | 0.072112 |
| DPM1     | 1.457924 | 2.86954  | 0.004256 | 0.015615 | 0.004266 | 0.015664 |
| DPP4     | 1.933213 | 2.088375 | 0.037186 | 0.088373 | 0.036618 | 0.08723  |
| DPP6     | 0.695272 | 0.837698 | 0.402535 | 0.53993  | 0.401283 | 0.538712 |
| DPP8     | -2.0352  | -3.80089 | 0.000159 | 0.001015 | 0.000158 | 0.001013 |
| DPT      | 1.91607  | 2.735457 | 0.006414 | 0.021877 | 0.006311 | 0.021588 |
| DPYD     | 1.100009 | 2.337971 | 0.019718 | 0.053168 | 0.019846 | 0.053557 |
| DPYSL2   | -0.73006 | -1.28772 | 0.198343 | 0.321564 | 0.198056 | 0.321098 |
| DPYSL3   | 1.482358 | 2.850374 | 0.004517 | 0.016433 | 0.004519 | 0.01644  |
| DPYSL4   | -1.42133 | -2.55738 | 0.010792 | 0.032937 | 0.010752 | 0.032827 |
| DRAP1    | 0.251864 | 0.797096 | 0.425712 | 0.562984 | 0.429266 | 0.565932 |
| DRG1     | -1.31005 | -1.39264 | 0.164245 | 0.279187 | 0.162959 | 0.277804 |
| DRP2     | -0.08402 | -0.10547 | 0.916036 | 0.949259 | 0.915826 | 0.949147 |
| DSCR3    | -0.76089 | -1.18816 | 0.235244 | 0.368918 | 0.234561 | 0.368288 |
| DSG2     | 5.229901 | 6.054738 | 2.49E-09 | 8.00E-08 | 2.24E-09 | 7.31E-08 |
| DSG3     | 1.654593 | 2.016054 | 0.044241 | 0.101195 | 0.043686 | 0.100355 |
| DSP      | 1.49045  | 2.238893 | 0.02553  | 0.065107 | 0.025282 | 0.064685 |
| DST      | 2.709965 | 5.817709 | 9.73E-09 | 2.54E-07 | 1.01E-08 | 2.64E-07 |
| DSTN     | 0.188984 | 0.409038 | 0.682659 | 0.785818 | 0.683041 | 0.786066 |
| DTNB     | -2.88456 | -3.53456 | 0.00044  | 0.002399 | 0.000425 | 0.002336 |
| DTX1     | -0.5154  | -1.03093 | 0.302989 | 0.444599 | 0.303203 | 0.444954 |
| DUSP1    | 0.934155 | 1.842376 | 0.065915 | 0.138675 | 0.065996 | 0.138825 |



|          |          |          |          |          |          |          |
|----------|----------|----------|----------|----------|----------|----------|
| DUSP10   | 0.649435 | 1.13391  | 0.257286 | 0.39492  | 0.256946 | 0.394269 |
| DUSP12   | 1.038368 | 1.602796 | 0.109508 | 0.205025 | 0.108966 | 0.204493 |
| DUSP18   | -1.82832 | -2.45709 | 0.01429  | 0.041178 | 0.014073 | 0.04073  |
| DUSP2    | 1.371218 | 2.722386 | 0.00667  | 0.022587 | 0.006689 | 0.022634 |
| DUSP3    | -0.50115 | -1.33989 | 0.180791 | 0.300892 | 0.182644 | 0.303009 |
| DUSP4    | -0.78329 | -0.74263 | 0.457995 | 0.594305 | 0.456494 | 0.592358 |
| DUSP5    | -0.0905  | -0.12451 | 0.900953 | 0.940149 | 0.900744 | 0.939916 |
| DUSP6    | 1.995383 | 3.002566 | 0.002789 | 0.011118 | 0.002743 | 0.011001 |
| DUT      | 2.005266 | 2.436985 | 0.015101 | 0.043024 | 0.014836 | 0.042438 |
| DVL2     | 1.2255   | 2.147573 | 0.032149 | 0.078738 | 0.032029 | 0.078363 |
| DVL3     | -0.5019  | -0.71055 | 0.477637 | 0.611812 | 0.476763 | 0.610901 |
| DYM      | -3.18354 | -3.45551 | 0.000588 | 0.003069 | 0.000566 | 0.002969 |
| DYRK1B   | 2.009881 | 2.330597 | 0.020106 | 0.053969 | 0.01976  | 0.053375 |
| DYRK2    | 1.087524 | 2.593162 | 0.009743 | 0.030389 | 0.009923 | 0.030885 |
| DYRK3    | -1.32173 | -2.5729  | 0.010325 | 0.031863 | 0.010337 | 0.031985 |
| DYRK4    | -2.65308 | -4.1596  | 3.66E-05 | 0.000298 | 3.56E-05 | 0.000294 |
| DYSF     | 1.575278 | 2.064185 | 0.039431 | 0.092802 | 0.038971 | 0.09195  |
| DYX1C1   | 1.852097 | 3.452224 | 0.000595 | 0.003102 | 0.000593 | 0.003079 |
| E2F4     | -0.41073 | -0.69816 | 0.485351 | 0.617695 | 0.484955 | 0.617191 |
| EBI3     | 0.055492 | 0.061997 | 0.950586 | 0.9708   | 0.950442 | 0.970718 |
| EBNA1BP2 | 0.032182 | 0.061773 | 0.950764 | 0.9708   | 0.950767 | 0.970803 |
| ECE1     | 1.303061 | 3.661926 | 0.000273 | 0.001632 | 0.000293 | 0.00174  |
| ECE2     | 0.799907 | 2.309467 | 0.021257 | 0.05651  | 0.021996 | 0.058011 |
| ECEL1    | 0.233523 | 0.271559 | 0.786055 | 0.858377 | 0.785473 | 0.858341 |
| ECH1     | 5.103572 | 6.956141 | 9.20E-12 | 7.09E-10 | 8.27E-12 | 6.48E-10 |
| ECHDC1   | 1.680205 | 3.873484 | 0.000119 | 0.000795 | 0.000123 | 0.000817 |
| ECHDC2   | 0.765406 | 1.843512 | 0.065749 | 0.138512 | 0.066455 | 0.139562 |
| ECM1     | -1.0338  | -1.8561  | 0.063931 | 0.135778 | 0.063796 | 0.135552 |
| ECM2     | 2.474078 | 5.072952 | 5.23E-07 | 8.31E-06 | 5.32E-07 | 8.45E-06 |
| EDA      | -1.44434 | -1.70133 | 0.0894   | 0.175734 | 0.088524 | 0.174058 |
| EDAR     | 2.57432  | 3.578681 | 0.000373 | 0.002104 | 0.000363 | 0.002062 |
| EDN1     | 1.582027 | 2.160173 | 0.031156 | 0.076586 | 0.030792 | 0.075732 |
| EDN3     | 0.154749 | 0.147127 | 0.883081 | 0.927275 | 0.882694 | 0.926868 |
| EDNRA    | 2.149986 | 4.909688 | 1.18E-06 | 1.69E-05 | 1.23E-06 | 1.77E-05 |
| EDNRB    | 0.432354 | 0.601753 | 0.547567 | 0.672651 | 0.546738 | 0.671985 |
| EEA1     | -0.37053 | -0.41885 | 0.675478 | 0.779461 | 0.674598 | 0.778637 |
| EED      | -0.50903 | -1.45337 | 0.146645 | 0.256792 | 0.14885  | 0.25959  |
| EEF1D    | 0.475871 | 0.900652 | 0.368136 | 0.507253 | 0.368104 | 0.506912 |
| EEF1E1   | -0.32341 | -0.82415 | 0.410183 | 0.547999 | 0.411801 | 0.549692 |
| EEF2     | 0.142762 | 0.386124 | 0.699542 | 0.798022 | 0.700813 | 0.798889 |
| EFEMP1   | 0.582263 | 0.818112 | 0.413619 | 0.551336 | 0.412674 | 0.550199 |

|          |          |          |          |          |          |          |
|----------|----------|----------|----------|----------|----------|----------|
| EFEMP2   | 0.302032 | 0.77704  | 0.437443 | 0.572696 | 0.439096 | 0.574701 |
| EFHA1    | -1.41468 | -2.63767 | 0.008565 | 0.027648 | 0.008551 | 0.027575 |
| EFHD1    | 0.123488 | 0.134386 | 0.893143 | 0.93378  | 0.892825 | 0.933822 |
| EFNA1    | 0.833697 | 1.713382 | 0.087161 | 0.171835 | 0.087383 | 0.172174 |
| EFNB1    | 3.844226 | 5.430527 | 8.18E-08 | 1.63E-06 | 7.70E-08 | 1.56E-06 |
| EFNB2    | 4.131319 | 5.910487 | 5.73E-09 | 1.63E-07 | 5.35E-09 | 1.55E-07 |
| EFNB3    | 1.118636 | 1.679898 | 0.093499 | 0.181433 | 0.092948 | 0.180607 |
| EFS      | -0.79636 | -1.19697 | 0.231792 | 0.365175 | 0.23101  | 0.364467 |
| EFTUD1   | 1.102725 | 1.665946 | 0.096248 | 0.185028 | 0.095699 | 0.18449  |
| EGFR     | -1.6518  | -1.99533 | 0.04646  | 0.105514 | 0.045881 | 0.104478 |
| EGLN1    | 0.618046 | 1.095311 | 0.273822 | 0.412752 | 0.273532 | 0.412247 |
| EGLN3    | 2.911931 | 4.694618 | 3.32E-06 | 4.00E-05 | 3.22E-06 | 3.90E-05 |
| EGR1     | 2.053259 | 3.578758 | 0.000373 | 0.002104 | 0.000369 | 0.002097 |
| EGR3     | 0.829775 | 1.229408 | 0.219402 | 0.348729 | 0.218594 | 0.347679 |
| EHD1     | -0.36159 | -1.04234 | 0.297675 | 0.439407 | 0.300401 | 0.442274 |
| EHD2     | 0.006269 | 0.01594  | 0.987287 | 0.991506 | 0.987331 | 0.99155  |
| EHD4     | -2.29511 | -2.81501 | 0.005038 | 0.018026 | 0.004925 | 0.01767  |
| EHF      | 4.239862 | 6.071181 | 2.26E-09 | 7.37E-08 | 2.10E-09 | 6.89E-08 |
| EHMT1    | 1.113724 | 1.260305 | 0.208051 | 0.334076 | 0.206747 | 0.332209 |
| EIF1AX   | 0.806447 | 2.049179 | 0.04088  | 0.095212 | 0.041568 | 0.096479 |
| EIF2AK2  | 0.697673 | 2.29312  | 0.022187 | 0.05829  | 0.023353 | 0.060709 |
| EIF2AK4  | -0.29923 | -1.05965 | 0.289729 | 0.432158 | 0.294891 | 0.437078 |
| EIF2B2   | 1.944141 | 2.881775 | 0.004096 | 0.01516  | 0.004031 | 0.014976 |
| EIF2B5   | -0.72747 | -2.46921 | 0.013819 | 0.040168 | 0.014735 | 0.042228 |
| EIF2C1   | -2.01114 | -3.94777 | 8.83E-05 | 0.000623 | 8.86E-05 | 0.000624 |
| EIF2C3   | -1.1732  | -2.61164 | 0.009237 | 0.029215 | 0.009348 | 0.029466 |
| EIF2S1   | -0.06657 | -0.20252 | 0.839579 | 0.897455 | 0.84065  | 0.897394 |
| EIF2S2   | 0.236984 | 0.287612 | 0.773744 | 0.850268 | 0.773163 | 0.84963  |
| EIF2S3   | 1.071925 | 2.016505 | 0.044194 | 0.101174 | 0.044166 | 0.101062 |
| EIF4A2   | -1.29714 | -3.8094  | 0.000154 | 0.000986 | 0.000168 | 0.00107  |
| EIF4B    | -0.59591 | -1.66761 | 0.095917 | 0.184651 | 0.097603 | 0.187404 |
| EIF4E    | -0.66245 | -2.06648 | 0.039213 | 0.092427 | 0.040666 | 0.094854 |
| EIF4E2   | 0.816403 | 2.277142 | 0.02313  | 0.060125 | 0.023821 | 0.061582 |
| EIF4EBP1 | -1.39702 | -1.69715 | 0.090189 | 0.17662  | 0.089344 | 0.175184 |
| EIF4G1   | -0.1872  | -0.35627 | 0.721766 | 0.814283 | 0.721762 | 0.814278 |
| EIF4G2   | -0.75809 | -1.14452 | 0.252867 | 0.389626 | 0.252084 | 0.388839 |
| EIF4G3   | -0.99553 | -2.54665 | 0.011126 | 0.03378  | 0.01141  | 0.034441 |
| EIF5     | 0.557649 | 1.288751 | 0.197983 | 0.32109  | 0.198908 | 0.322257 |
| EIF5A    | -0.38339 | -0.67325 | 0.501051 | 0.631182 | 0.500764 | 0.630863 |
| ELAVL1   | -2.95155 | -6.65806 | 6.29E-11 | 3.52E-09 | 6.73E-11 | 3.78E-09 |
| ELF1     | -0.72265 | -2.07019 | 0.038863 | 0.091742 | 0.039945 | 0.093823 |

|         |          |          |          |          |          |          |
|---------|----------|----------|----------|----------|----------|----------|
| ELF3    | 3.140337 | 6.354849 | 4.14E-10 | 1.56E-08 | 4.21E-10 | 1.59E-08 |
| ELF4    | 0.910658 | 1.389633 | 0.165157 | 0.280469 | 0.164485 | 0.279594 |
| ELK1    | 3.155531 | 4.2436   | 2.55E-05 | 0.00022  | 2.44E-05 | 0.000213 |
| ELK3    | 0.793863 | 0.936865 | 0.349206 | 0.489067 | 0.347889 | 0.487935 |
| ELK4    | -0.53047 | -0.81955 | 0.412802 | 0.550559 | 0.412092 | 0.549924 |
| ELL     | 1.774342 | 2.615473 | 0.009135 | 0.028991 | 0.009011 | 0.028626 |
| ELMOD2  | 2.217703 | 3.240749 | 0.001258 | 0.005731 | 0.001232 | 0.005629 |
| ELN     | 1.231429 | 2.526204 | 0.011787 | 0.035264 | 0.011844 | 0.035479 |
| ELOVL1  | -0.55251 | -1.27451 | 0.202979 | 0.327918 | 0.2039   | 0.328758 |
| ELP3    | 1.424659 | 2.786508 | 0.005497 | 0.019295 | 0.005507 | 0.019343 |
| ELP4    | -1.92457 | -2.17347 | 0.030137 | 0.074392 | 0.029664 | 0.073418 |
| EMCN    | 3.501166 | 7.611146 | 1.06E-13 | 1.22E-11 | 1.13E-13 | 1.29E-11 |
| EML1    | 0.492607 | 0.780802 | 0.435228 | 0.571106 | 0.4346   | 0.570176 |
| EML4    | 2.525346 | 3.893308 | 0.00011  | 0.000744 | 0.000107 | 0.000727 |
| EMP3    | 1.446622 | 2.710585 | 0.006909 | 0.023238 | 0.006899 | 0.023229 |
| ENAH    | 0.907751 | 1.095517 | 0.273731 | 0.412749 | 0.272458 | 0.411224 |
| ENG     | 0.35172  | 0.620095 | 0.535432 | 0.662633 | 0.53517  | 0.66227  |
| ENO1    | 0.381066 | 1.016973 | 0.309578 | 0.451447 | 0.311617 | 0.453858 |
| ENO2    | -1.1836  | -2.08856 | 0.03717  | 0.088373 | 0.037048 | 0.08803  |
| ENPEP   | 3.581628 | 6.395738 | 3.22E-10 | 1.28E-08 | 3.14E-10 | 1.28E-08 |
| ENPP2   | -0.74239 | -1.0232  | 0.306628 | 0.448162 | 0.305605 | 0.447171 |
| ENSA    | 0.125976 | 0.381358 | 0.703073 | 0.800257 | 0.704956 | 0.801474 |
| ENTPD1  | 0.454198 | 0.542896 | 0.587404 | 0.706519 | 0.586399 | 0.705765 |
| ENTPD2  | 2.096248 | 2.055825 | 0.040233 | 0.094124 | 0.039585 | 0.093072 |
| ENTPD3  | 0.846391 | 1.753887 | 0.079962 | 0.161366 | 0.0802   | 0.161777 |
| ENTPD4  | 1.511495 | 1.541238 | 0.123788 | 0.226036 | 0.122601 | 0.224296 |
| ENTPD5  | 0.855789 | 1.013514 | 0.311224 | 0.453427 | 0.309908 | 0.451929 |
| EP300   | 0.09707  | 0.186805 | 0.851877 | 0.905637 | 0.851889 | 0.90565  |
| EP400   | -1.68712 | -2.60902 | 0.009307 | 0.029359 | 0.0092   | 0.029079 |
| EPAS1   | 2.224136 | 3.191673 | 0.001489 | 0.006632 | 0.001457 | 0.006505 |
| EPB41   | 1.642142 | 3.652116 | 0.000283 | 0.001679 | 0.000289 | 0.001724 |
| EPB41L1 | 0.956264 | 1.780234 | 0.075545 | 0.154308 | 0.075482 | 0.154247 |
| EPB41L2 | 1.542342 | 3.246004 | 0.001236 | 0.005661 | 0.001249 | 0.005698 |
| EPB41L3 | -4.08355 | -3.95111 | 8.71E-05 | 0.000615 | 8.25E-05 | 0.000587 |
| EPB49   | 1.42034  | 1.84306  | 0.065815 | 0.138527 | 0.065173 | 0.137669 |
| EPHA1   | 0.519701 | 0.55498  | 0.579116 | 0.699343 | 0.577961 | 0.698308 |
| EPHA4   | -0.11346 | -0.14788 | 0.882491 | 0.926862 | 0.882216 | 0.926573 |
| EPHB2   | -0.61319 | -0.97604 | 0.329439 | 0.470626 | 0.32879  | 0.4697   |
| EPHB3   | -1.5892  | -1.79083 | 0.073826 | 0.151454 | 0.072996 | 0.150079 |
| EPHB4   | -0.26899 | -0.3419  | 0.732547 | 0.823283 | 0.731914 | 0.822769 |
| EPHB6   | -1.56133 | -1.48706 | 0.137527 | 0.24484  | 0.136221 | 0.243252 |

|          |          |          |          |          |          |          |
|----------|----------|----------|----------|----------|----------|----------|
| EPHX1    | 0.476649 | 0.966739 | 0.334065 | 0.475358 | 0.334345 | 0.475468 |
| EPM2A    | 0.795402 | 3.041648 | 0.002456 | 0.010064 | 0.002795 | 0.011116 |
| EPM2AIP1 | 1.568288 | 2.880751 | 0.004109 | 0.015196 | 0.004097 | 0.015125 |
| EPN1     | 1.445066 | 5.41932  | 8.69E-08 | 1.72E-06 | 1.24E-07 | 2.37E-06 |
| EPOR     | -0.22746 | -0.30684 | 0.759073 | 0.839445 | 0.758556 | 0.839071 |
| EPRS     | 1.10847  | 2.482369 | 0.013325 | 0.038995 | 0.013477 | 0.039392 |
| EPS15    | 0.763023 | 1.699636 | 0.089719 | 0.175921 | 0.090233 | 0.176559 |
| EPS15L1  | 2.526921 | 3.346975 | 0.000868 | 0.004218 | 0.000845 | 0.004127 |
| EPS8L2   | 1.137355 | 1.702986 | 0.08909  | 0.175198 | 0.088547 | 0.174058 |
| EPSTI1   | 0.020086 | 0.02536  | 0.979776 | 0.98607  | 0.979726 | 0.98602  |
| ERAL1    | 0.930446 | 3.376486 | 0.000782 | 0.003868 | 0.000896 | 0.004341 |
| ERBB2    | 3.860466 | 5.211995 | 2.58E-07 | 4.45E-06 | 2.42E-07 | 4.23E-06 |
| ERBB3    | -1.01998 | -1.49943 | 0.134289 | 0.240716 | 0.133589 | 0.239828 |
| ERCC1    | 1.678536 | 2.208206 | 0.027609 | 0.069279 | 0.027249 | 0.068486 |
| ERCC2    | 2.53455  | 3.957667 | 8.48E-05 | 0.000605 | 8.27E-05 | 0.000588 |
| ERCC3    | -1.14887 | -1.32276 | 0.186419 | 0.307321 | 0.185181 | 0.305892 |
| ERCC5    | 0.021108 | 0.06333  | 0.949525 | 0.970588 | 0.94985  | 0.970568 |
| ERCC8    | -0.58844 | -0.94165 | 0.346752 | 0.487505 | 0.346121 | 0.487348 |
| ERF      | -0.4626  | -0.78795 | 0.431036 | 0.567566 | 0.430625 | 0.566929 |
| ERG      | 1.418976 | 4.230067 | 2.70E-05 | 0.000232 | 3.03E-05 | 0.000256 |
| ERO1L    | -0.13668 | -0.35684 | 0.721338 | 0.813995 | 0.722365 | 0.814567 |
| ERO1LB   | -1.40579 | -1.81147 | 0.070569 | 0.146021 | 0.069893 | 0.144905 |
| ESD      | 0.129636 | 0.228084 | 0.819659 | 0.882388 | 0.819543 | 0.882312 |
| ESM1     | 2.711315 | 4.2017   | 3.05E-05 | 0.000257 | 2.97E-05 | 0.000251 |
| ESPL1    | -1.7525  | -2.66553 | 0.007894 | 0.025964 | 0.007794 | 0.025724 |
| ESRRA    | 2.072072 | 3.045945 | 0.002422 | 0.00994  | 0.002378 | 0.009803 |
| ETFA     | 0.712534 | 0.852741 | 0.394145 | 0.532934 | 0.392875 | 0.53137  |
| ETFB     | 0.283062 | 0.380683 | 0.703574 | 0.800262 | 0.702945 | 0.799799 |
| ETNK1    | 0.754877 | 1.051788 | 0.293322 | 0.43558  | 0.292326 | 0.434651 |
| ETS2     | 2.104502 | 2.495036 | 0.012863 | 0.037809 | 0.01262  | 0.037303 |
| ETV4     | -3.99908 | -4.10751 | 4.56E-05 | 0.00036  | 4.31E-05 | 0.000345 |
| ETV5     | -1.73402 | -2.81659 | 0.005014 | 0.017961 | 0.00496  | 0.017783 |
| ETV6     | 0.971245 | 3.412016 | 0.000688 | 0.003498 | 0.000781 | 0.003878 |
| EVI2B    | 0.428022 | 1.195784 | 0.232255 | 0.365449 | 0.234607 | 0.368288 |
| EVL      | -2.55196 | -7.02355 | 5.90E-12 | 4.95E-10 | 7.30E-12 | 6.02E-10 |
| EVPL     | 1.523318 | 3.623897 | 0.000315 | 0.001832 | 0.000325 | 0.001883 |
| EWSR1    | -0.29075 | -0.89837 | 0.369352 | 0.508184 | 0.372762 | 0.511901 |
| EXO1     | -0.75318 | -1.5348  | 0.125363 | 0.22801  | 0.125597 | 0.228044 |
| EXOSC10  | 0.221441 | 0.34128  | 0.733013 | 0.82361  | 0.732619 | 0.823168 |
| EXOSC4   | 1.084202 | 1.34682  | 0.178548 | 0.298215 | 0.177442 | 0.296895 |
| EXOSC5   | -0.62172 | -0.79944 | 0.424351 | 0.561659 | 0.423233 | 0.560179 |

|         |          |          |          |          |          |          |
|---------|----------|----------|----------|----------|----------|----------|
| EXT1    | -3.06078 | -3.32774 | 0.000929 | 0.004461 | 0.000897 | 0.004341 |
| EXTL2   | 2.930292 | 4.90828  | 1.19E-06 | 1.70E-05 | 1.16E-06 | 1.68E-05 |
| EXTL3   | -0.89463 | -1.42027 | 0.156049 | 0.268853 | 0.155487 | 0.268277 |
| EYA2    | 0.008033 | 0.009041 | 0.992789 | 0.99427  | 0.992768 | 0.994278 |
| EYA3    | 0.423809 | 0.64592  | 0.518579 | 0.647746 | 0.517911 | 0.647217 |
| EZH1    | -0.34989 | -1.48086 | 0.139169 | 0.246829 | 0.145966 | 0.25608  |
| EZH2    | 0.441788 | 0.536909 | 0.59153  | 0.71032  | 0.590555 | 0.709148 |
| F10     | 0.54225  | 0.542413 | 0.587736 | 0.706519 | 0.586535 | 0.705765 |
| F11R    | 2.163291 | 5.184775 | 2.96E-07 | 5.05E-06 | 3.16E-07 | 5.33E-06 |
| F13A1   | 2.067228 | 2.706951 | 0.006984 | 0.023448 | 0.006852 | 0.023103 |
| F2R     | -1.03331 | -2.59538 | 0.009681 | 0.030313 | 0.009915 | 0.030882 |
| F2RL1   | 1.204012 | 1.945133 | 0.052227 | 0.116723 | 0.051932 | 0.116378 |
| F2RL3   | 1.284751 | 1.941657 | 0.052648 | 0.11745  | 0.052258 | 0.116815 |
| F3      | 3.17372  | 4.019049 | 6.59E-05 | 0.000485 | 6.32E-05 | 0.000474 |
| F5      | -0.33216 | -0.42979 | 0.667503 | 0.773871 | 0.666757 | 0.773041 |
| F7      | -1.37094 | -1.45429 | 0.14639  | 0.256442 | 0.145157 | 0.254852 |
| F8      | 1.193555 | 2.018321 | 0.044004 | 0.100999 | 0.043802 | 0.100523 |
| FAAH    | 0.099912 | 0.20506  | 0.837595 | 0.896129 | 0.837707 | 0.89625  |
| FABP3   | 1.943761 | 2.914295 | 0.003698 | 0.014035 | 0.00364  | 0.013887 |
| FABP4   | 2.798432 | 5.063727 | 5.48E-07 | 8.65E-06 | 5.41E-07 | 8.56E-06 |
| FABP6   | -1.2558  | -1.0255  | 0.305544 | 0.447463 | 0.303793 | 0.4455   |
| FADD    | 0.209151 | 0.359209 | 0.719565 | 0.81258  | 0.719342 | 0.812327 |
| FADS3   | -2.4481  | -3.68252 | 0.000252 | 0.00153  | 0.000246 | 0.0015   |
| FAF1    | 0.822875 | 1.868245 | 0.062217 | 0.133175 | 0.062696 | 0.134045 |
| FAH     | 1.075554 | 1.783695 | 0.07498  | 0.153487 | 0.074665 | 0.152909 |
| FAHD2A  | -0.11952 | -0.37179 | 0.710182 | 0.805222 | 0.712192 | 0.806579 |
| FAIM2   | 2.438475 | 2.51277  | 0.012241 | 0.036412 | 0.01197  | 0.035721 |
| FAM19A5 | -4.252   | -4.14757 | 3.85E-05 | 0.000312 | 3.63E-05 | 0.000298 |
| FAM36A  | 2.184858 | 3.937979 | 9.19E-05 | 0.000642 | 9.11E-05 | 0.00064  |
| FAM3A   | -1.31348 | -4.6083  | 4.97E-06 | 5.58E-05 | 6.18E-06 | 6.78E-05 |
| FAM3C   | 1.648941 | 2.555505 | 0.01085  | 0.03307  | 0.01073  | 0.032791 |
| FAM40A  | 1.240291 | 3.10347  | 0.002003 | 0.008435 | 0.002069 | 0.008698 |
| FAM48A  | -1.46166 | -2.30766 | 0.021358 | 0.056746 | 0.021177 | 0.056423 |
| FANCA   | -1.1983  | -3.55986 | 0.000401 | 0.002225 | 0.000435 | 0.002382 |
| FANCC   | 0.034233 | 0.087303 | 0.93046  | 0.958186 | 0.9307   | 0.958434 |
| FANCD2  | -0.51062 | -0.78998 | 0.429851 | 0.566545 | 0.429153 | 0.565932 |
| FANCG   | 1.071505 | 1.907499 | 0.056935 | 0.12481  | 0.056792 | 0.124613 |
| FAP     | 1.945695 | 1.736627 | 0.082968 | 0.165654 | 0.081906 | 0.164091 |
| FAFP1   | 1.791979 | 3.129983 | 0.001833 | 0.007855 | 0.001819 | 0.007808 |
| FARS2   | 0.714492 | 0.767371 | 0.443164 | 0.578896 | 0.441784 | 0.577123 |
| FAS     | 1.33169  | 2.217485 | 0.026965 | 0.067919 | 0.026803 | 0.06762  |

|        |          |          |          |          |          |          |
|--------|----------|----------|----------|----------|----------|----------|
| FASN   | -1.15731 | -3.16176 | 0.001648 | 0.007203 | 0.00173  | 0.007494 |
| FAU    | -0.08694 | -0.32176 | 0.747746 | 0.832206 | 0.750674 | 0.833419 |
| FBL    | -0.19643 | -0.58133 | 0.561235 | 0.684789 | 0.563653 | 0.687025 |
| FBLN1  | -1.82917 | -3.16739 | 0.001617 | 0.007087 | 0.001603 | 0.007033 |
| FBLN2  | -0.2471  | -0.36423 | 0.715816 | 0.810168 | 0.715332 | 0.80955  |
| FBLN5  | -1.09951 | -2.35941 | 0.018624 | 0.050774 | 0.018761 | 0.051145 |
| FBN1   | -1.43314 | -4.13171 | 4.11E-05 | 0.000332 | 4.53E-05 | 0.000359 |
| FBP1   | 0.572367 | 0.673435 | 0.500931 | 0.631182 | 0.499756 | 0.630468 |
| FBP2   | 3.781747 | 3.786051 | 0.000169 | 0.001072 | 0.000161 | 0.001024 |
| FBXL15 | -2.58471 | -2.63426 | 0.00865  | 0.027828 | 0.008441 | 0.02736  |
| FBXO10 | 2.005268 | 1.965811 | 0.049783 | 0.111898 | 0.049041 | 0.110547 |
| FBXO11 | 1.720881 | 3.930129 | 9.48E-05 | 0.000658 | 9.77E-05 | 0.000678 |
| FBXO16 | 0.995434 | 1.695466 | 0.090508 | 0.17717  | 0.090218 | 0.176559 |
| FBXO2  | 3.890324 | 3.713827 | 0.000223 | 0.001379 | 0.000213 | 0.001324 |
| FBXO21 | 0.64037  | 1.698571 | 0.08992  | 0.176167 | 0.091241 | 0.178236 |
| FBXO34 | 0.243879 | 0.362106 | 0.7174   | 0.810916 | 0.716929 | 0.810439 |
| FBXO38 | -1.11313 | -2.41598 | 0.015992 | 0.045006 | 0.016127 | 0.045279 |
| FBXO9  | -1.27041 | -2.8972  | 0.003903 | 0.014564 | 0.00397  | 0.014808 |
| FBXW11 | -0.58625 | -1.19253 | 0.233527 | 0.36696  | 0.233811 | 0.367772 |
| FBXW2  | -1.2571  | -1.73261 | 0.08368  | 0.166792 | 0.083026 | 0.165687 |
| FBXW7  | 1.833778 | 4.431661 | 1.11E-05 | 0.000111 | 1.17E-05 | 0.000115 |
| FCER1G | 1.864906 | 3.845222 | 0.000133 | 0.000873 | 0.000135 | 0.000885 |
| FCER2  | -0.61153 | -0.70619 | 0.480346 | 0.613819 | 0.479115 | 0.613079 |
| FCGR1A | -0.30828 | -0.47638 | 0.633978 | 0.74511  | 0.633463 | 0.74435  |
| FCGR2A | -0.5119  | -0.94446 | 0.345317 | 0.487112 | 0.345181 | 0.4873   |
| FCGR2B | -0.05487 | -0.07707 | 0.938593 | 0.963946 | 0.938469 | 0.963899 |
| FCGRT  | -0.06759 | -0.1646  | 0.869317 | 0.917743 | 0.869677 | 0.918123 |
| FCHO2  | 1.038059 | 1.999911 | 0.045962 | 0.104657 | 0.045979 | 0.104599 |
| FCN1   | 0.403869 | 0.67294  | 0.501245 | 0.631257 | 0.500798 | 0.630863 |
| FCN3   | 1.3867   | 2.466744 | 0.013914 | 0.040393 | 0.013858 | 0.040254 |
| FDFT1  | -1.87043 | -3.68243 | 0.000252 | 0.00153  | 0.000253 | 0.001531 |
| FDX1   | 2.372088 | 4.091393 | 4.88E-05 | 0.000379 | 4.80E-05 | 0.000376 |
| FECH   | -2.68702 | -3.02225 | 0.002616 | 0.010564 | 0.002542 | 0.010318 |
| FEN1   | 2.157079 | 3.856292 | 0.000128 | 0.000841 | 0.000126 | 0.000836 |
| FER    | 2.17873  | 2.739386 | 0.006339 | 0.021699 | 0.006208 | 0.021314 |
| FEZ1   | 0.406404 | 0.866369 | 0.386635 | 0.526284 | 0.387159 | 0.526173 |
| FGA    | 1.271885 | 2.314303 | 0.020989 | 0.055963 | 0.020936 | 0.05591  |
| FGD1   | 1.66728  | 2.016855 | 0.044157 | 0.10114  | 0.043598 | 0.100298 |
| FGD2   | 1.554147 | 4.422334 | 1.16E-05 | 0.000114 | 1.29E-05 | 0.000124 |
| FGD6   | -1.34924 | -1.8474  | 0.065184 | 0.137753 | 0.064608 | 0.136777 |
| FGF1   | 3.086133 | 6.499084 | 1.70E-10 | 7.85E-09 | 1.76E-10 | 8.12E-09 |

|          |          |          |          |          |          |          |
|----------|----------|----------|----------|----------|----------|----------|
| FGF11    | 3.294156 | 4.070361 | 5.32E-05 | 0.00041  | 5.09E-05 | 0.000394 |
| FGF12    | -1.27992 | -2.06428 | 0.039422 | 0.092802 | 0.039172 | 0.092286 |
| FGF18    | -0.12197 | -0.17183 | 0.863628 | 0.913925 | 0.863356 | 0.913541 |
| FGF9     | 1.500974 | 1.62632  | 0.104408 | 0.19795  | 0.10337  | 0.196299 |
| FGFBP1   | 1.601593 | 1.523138 | 0.128253 | 0.231931 | 0.126985 | 0.230169 |
| FGFR1    | 0.495252 | 0.920051 | 0.357917 | 0.49786  | 0.357809 | 0.498134 |
| FGFR1OP  | 1.987312 | 4.67871  | 3.57E-06 | 4.24E-05 | 3.75E-06 | 4.42E-05 |
| FGFR1OP2 | -0.41129 | -1.34138 | 0.180306 | 0.300191 | 0.183987 | 0.304485 |
| FGFR4    | 2.566998 | 3.44672  | 0.000607 | 0.003147 | 0.00059  | 0.003072 |
| FGL1     | 0.07323  | 0.088814 | 0.929259 | 0.957579 | 0.929073 | 0.957387 |
| FGL2     | 0.147164 | 0.172962 | 0.86274  | 0.913925 | 0.862366 | 0.913541 |
| FH       | 2.376792 | 5.616697 | 2.98E-08 | 6.62E-07 | 3.20E-08 | 7.22E-07 |
| FHIT     | -0.19687 | -0.24674 | 0.805195 | 0.871784 | 0.804714 | 0.871264 |
| FHL1     | -2.309   | -4.40413 | 1.26E-05 | 0.000122 | 1.26E-05 | 0.000122 |
| FHL2     | -0.54948 | -0.83485 | 0.404134 | 0.541765 | 0.403375 | 0.540748 |
| FHL3     | 1.639037 | 2.584013 | 0.010002 | 0.031029 | 0.009897 | 0.030846 |
| FHOD3    | -0.06974 | -0.06616 | 0.947275 | 0.969132 | 0.947099 | 0.968952 |
| FIBP     | -0.957   | -2.93898 | 0.00342  | 0.013197 | 0.003649 | 0.013897 |
| FIGNL1   | 1.218738 | 1.971623 | 0.049113 | 0.110766 | 0.048831 | 0.110214 |
| FIP1L1   | 0.852879 | 2.589871 | 0.009835 | 0.030641 | 0.010336 | 0.031985 |
| FKBP11   | -0.47531 | -0.90576 | 0.365428 | 0.504776 | 0.365425 | 0.504257 |
| FKBP1A   | -1.25366 | -2.90266 | 0.003836 | 0.014358 | 0.003909 | 0.014652 |
| FKBP2    | -0.16026 | -0.2636  | 0.79218  | 0.863261 | 0.79195  | 0.863011 |
| FKBP4    | -0.06256 | -0.1343  | 0.893214 | 0.93378  | 0.89334  | 0.933874 |
| FKBP5    | -0.66573 | -1.31679 | 0.188414 | 0.30974  | 0.188561 | 0.309981 |
| FKBP8    | 0.300694 | 0.726456 | 0.467843 | 0.603918 | 0.46903  | 0.604122 |
| FKBP9    | 0.019652 | 0.052984 | 0.957763 | 0.975293 | 0.957948 | 0.975335 |
| FLI1     | -1.61192 | -3.3036  | 0.001012 | 0.004788 | 0.001019 | 0.004824 |
| FLII     | -1.52524 | -1.54489 | 0.122902 | 0.224937 | 0.121713 | 0.223116 |
| FLJ36031 | -0.75244 | -1.01412 | 0.310937 | 0.453148 | 0.309865 | 0.451929 |
| FLNB     | 1.226482 | 2.036773 | 0.042113 | 0.097454 | 0.041892 | 0.09699  |
| FLNC     | 0.641774 | 1.414967 | 0.157599 | 0.270531 | 0.158214 | 0.271267 |
| FLOT1    | 0.177307 | 0.462755 | 0.643708 | 0.753344 | 0.644982 | 0.754083 |
| FLRT2    | 0.05274  | 0.077646 | 0.938136 | 0.963946 | 0.938025 | 0.963865 |
| FLRT3    | 0.495849 | 0.476037 | 0.634222 | 0.745211 | 0.633099 | 0.74435  |
| FLT1     | 3.838818 | 5.946288 | 4.67E-09 | 1.37E-07 | 4.41E-09 | 1.33E-07 |
| FLT3LG   | 5.438098 | 5.394084 | 9.93E-08 | 1.95E-06 | 9.03E-08 | 1.79E-06 |
| FMNL1    | -1.70042 | -4.36009 | 1.53E-05 | 0.000143 | 1.64E-05 | 0.000152 |
| FMO1     | 0.967943 | 1.643497 | 0.100806 | 0.192284 | 0.100492 | 0.191841 |
| FMO2     | -4.65953 | -4.64226 | 4.24E-06 | 4.88E-05 | 3.95E-06 | 4.61E-05 |
| FMO4     | -0.76786 | -1.24107 | 0.215068 | 0.342871 | 0.214496 | 0.341855 |

|       |          |          |          |          |          |          |
|-------|----------|----------|----------|----------|----------|----------|
| FMO5  | 0.337498 | 0.516734 | 0.605533 | 0.722153 | 0.604966 | 0.72166  |
| FMOD  | 1.626896 | 1.903559 | 0.057447 | 0.125693 | 0.05676  | 0.124602 |
| FN1   | 2.206139 | 4.321298 | 1.82E-05 | 0.000165 | 1.82E-05 | 0.000166 |
| FN3K  | -1.38702 | -1.43636 | 0.151424 | 0.262908 | 0.150148 | 0.261078 |
| FNBP1 | 0.820979 | 2.378206 | 0.01771  | 0.049108 | 0.018367 | 0.050263 |
| FNBP4 | -0.21416 | -0.2726  | 0.785256 | 0.858303 | 0.784741 | 0.858019 |
| FNTA  | -0.63523 | -1.19663 | 0.231925 | 0.365175 | 0.231874 | 0.365585 |
| FNTB  | -0.53755 | -0.56716 | 0.570819 | 0.693064 | 0.569635 | 0.691804 |
| FOLR1 | -0.36072 | -0.36415 | 0.715878 | 0.810168 | 0.715011 | 0.809381 |
| FOLR2 | 0.18833  | 0.324958 | 0.745327 | 0.832075 | 0.74513  | 0.831856 |
| FOLR3 | 2.382362 | 4.158397 | 3.67E-05 | 0.000299 | 3.62E-05 | 0.000298 |
| FOSB  | 1.214143 | 2.062961 | 0.039547 | 0.092983 | 0.039366 | 0.092674 |
| FOSL1 | 0.585799 | 0.882317 | 0.37796  | 0.516849 | 0.377166 | 0.516179 |
| FOXA1 | 1.180936 | 1.200181 | 0.230544 | 0.36361  | 0.229066 | 0.361886 |
| FOXA2 | -0.38885 | -0.78659 | 0.431836 | 0.568046 | 0.432091 | 0.568375 |
| FOXA3 | 3.139636 | 4.765752 | 2.36E-06 | 3.00E-05 | 2.27E-06 | 2.93E-05 |
| FOXDI | -1.40618 | -1.85438 | 0.064177 | 0.136178 | 0.063563 | 0.135277 |
| FOXF1 | -0.87082 | -1.83226 | 0.06741  | 0.141188 | 0.06767  | 0.141418 |
| FOXF2 | -0.64657 | -1.41499 | 0.157592 | 0.270531 | 0.158171 | 0.271267 |
| FOXJ1 | 1.347449 | 2.347487 | 0.019226 | 0.052111 | 0.019136 | 0.051898 |
| FOXJ2 | 0.676039 | 1.359598 | 0.17447  | 0.293279 | 0.174681 | 0.29332  |
| FOXMI | 0.939404 | 1.382399 | 0.167365 | 0.283574 | 0.166605 | 0.282585 |
| FPGS  | 1.263789 | 2.116441 | 0.03472  | 0.08347  | 0.034535 | 0.083114 |
| FPGT  | -1.28498 | -2.57968 | 0.010127 | 0.031354 | 0.010161 | 0.031543 |
| FPR1  | 1.232166 | 1.717318 | 0.086439 | 0.170944 | 0.08579  | 0.169869 |
| FRG1  | -1.08719 | -3.40236 | 0.000713 | 0.003602 | 0.00078  | 0.003874 |
| FRS2  | 2.144156 | 3.658739 | 0.000276 | 0.001644 | 0.000272 | 0.001634 |
| FRS3  | -1.13421 | -1.27381 | 0.203227 | 0.328123 | 0.201921 | 0.326462 |
| FRZB  | 2.650616 | 4.322119 | 1.81E-05 | 0.000165 | 1.77E-05 | 0.000161 |
| FSCN2 | 1.979295 | 3.275153 | 0.001117 | 0.005193 | 0.001103 | 0.005137 |
| FST   | -0.23269 | -0.25691 | 0.797334 | 0.867057 | 0.796749 | 0.866633 |
| FSTL1 | -1.65555 | -2.66664 | 0.007869 | 0.025899 | 0.007789 | 0.025724 |
| FTCD  | 0.342431 | 0.463825 | 0.642942 | 0.753009 | 0.642213 | 0.751968 |
| FTSJ1 | 1.294256 | 3.147331 | 0.00173  | 0.007493 | 0.00178  | 0.007662 |
| FUBP1 | -1.80437 | -2.75137 | 0.006114 | 0.021054 | 0.006033 | 0.020864 |
| FUBP3 | 2.812424 | 4.169392 | 3.51E-05 | 0.000288 | 3.39E-05 | 0.000281 |
| FURIN | 1.892072 | 5.536798 | 4.62E-08 | 9.91E-07 | 5.50E-08 | 1.16E-06 |
| FUT10 | 2.871308 | 3.496089 | 0.000507 | 0.002693 | 0.00049  | 0.002623 |
| FUT6  | -1.88519 | -1.89781 | 0.058203 | 0.126821 | 0.057402 | 0.125718 |
| FUT8  | 3.888509 | 5.759983 | 1.35E-08 | 3.38E-07 | 1.27E-08 | 3.22E-07 |
| FXC1  | -0.39717 | -1.47201 | 0.141544 | 0.250003 | 0.146395 | 0.256642 |



|           |          |          |          |          |          |          |
|-----------|----------|----------|----------|----------|----------|----------|
| FXN       | 0.346682 | 0.636672 | 0.524582 | 0.653815 | 0.52445  | 0.65365  |
| FXR1      | 1.380269 | 1.843669 | 0.065726 | 0.138512 | 0.065118 | 0.137614 |
| FXR2      | 3.233487 | 4.491389 | 8.49E-06 | 8.70E-05 | 8.13E-06 | 8.42E-05 |
| FXYD2     | -1.52694 | -2.24467 | 0.025154 | 0.06442  | 0.024892 | 0.063766 |
| FXYD3     | 2.532855 | 3.179729 | 0.00155  | 0.006829 | 0.001508 | 0.006675 |
| FYB       | -1.27476 | -2.06599 | 0.039259 | 0.09249  | 0.039017 | 0.092011 |
| FYN       | 0.963184 | 2.603478 | 0.009457 | 0.029752 | 0.009775 | 0.030547 |
| FZD3      | -2.48045 | -2.55972 | 0.01072  | 0.032789 | 0.010476 | 0.032266 |
| FZD4      | 2.111075 | 2.587408 | 0.009905 | 0.03083  | 0.009713 | 0.030415 |
| FZD7      | 0.647198 | 1.372356 | 0.170467 | 0.287579 | 0.170911 | 0.288225 |
| FZD9      | -0.74947 | -1.17229 | 0.241549 | 0.375672 | 0.240867 | 0.37486  |
| FZR1      | -0.22885 | -0.57389 | 0.56626  | 0.688595 | 0.567506 | 0.689754 |
| G3BP2     | -0.98172 | -1.83532 | 0.066955 | 0.140297 | 0.066905 | 0.140319 |
| GAA       | -0.45733 | -0.74007 | 0.459548 | 0.595664 | 0.458993 | 0.594944 |
| GAB1      | -0.96654 | -1.7588  | 0.079123 | 0.160016 | 0.079002 | 0.159703 |
| GAB2      | -0.36883 | -0.78488 | 0.432834 | 0.569041 | 0.433333 | 0.569568 |
| GABARAP   | 0.310916 | 1.04403  | 0.296893 | 0.438666 | 0.301334 | 0.442723 |
| GABARAPL2 | -1.06994 | -4.03153 | 6.26E-05 | 0.000467 | 7.71E-05 | 0.000556 |
| GABBR1    | 2.253839 | 3.128795 | 0.001841 | 0.007879 | 0.0018   | 0.007734 |
| GABPB2    | 0.648552 | 1.572687 | 0.11632  | 0.215493 | 0.117311 | 0.216816 |
| GABRB1    | -1.07547 | -1.47234 | 0.141455 | 0.249969 | 0.140601 | 0.248711 |
| GABRB3    | 0.487637 | 0.679725 | 0.496942 | 0.628785 | 0.496055 | 0.628233 |
| GABRD     | 0.381611 | 0.656013 | 0.512068 | 0.64145  | 0.511719 | 0.641013 |
| GABRE     | -1.38532 | -2.59758 | 0.00962  | 0.030161 | 0.009607 | 0.030165 |
| GAD1      | 0.1489   | 0.225593 | 0.821595 | 0.883637 | 0.821309 | 0.88333  |
| GADD45B   | -0.02626 | -0.06804 | 0.945775 | 0.968229 | 0.945976 | 0.968393 |
| GADD45G   | -2.26634 | -2.63689 | 0.008585 | 0.027673 | 0.008401 | 0.027269 |
| GAK       | 0.042809 | 0.15045  | 0.880461 | 0.92535  | 0.881698 | 0.926378 |
| GALE      | -1.73678 | -2.1287  | 0.033687 | 0.081783 | 0.033227 | 0.08079  |
| GALK1     | 0.839218 | 2.43022  | 0.015383 | 0.043606 | 0.015975 | 0.045014 |
| GALK2     | 1.382061 | 2.436241 | 0.015132 | 0.043024 | 0.015065 | 0.042886 |
| GALNS     | 0.030842 | 0.116447 | 0.907337 | 0.944025 | 0.908506 | 0.944685 |
| GALNT11   | 1.337172 | 3.136351 | 0.001795 | 0.007705 | 0.001837 | 0.007871 |
| GALNT3    | -0.13664 | -0.17069 | 0.864525 | 0.914121 | 0.864186 | 0.913968 |
| GALNT6    | 0.489626 | 0.592023 | 0.554059 | 0.679207 | 0.553009 | 0.67792  |
| GALNT7    | 0.973402 | 2.038923 | 0.041897 | 0.097051 | 0.042081 | 0.097376 |
| GALNTL2   | 0.970546 | 1.689122 | 0.091717 | 0.178868 | 0.091476 | 0.178545 |
| GAMT      | -0.83911 | -1.37128 | 0.170802 | 0.287937 | 0.170299 | 0.287502 |
| GAP43     | -1.28517 | -1.5437  | 0.123191 | 0.22529  | 0.12219  | 0.223722 |
| GARS      | -0.57316 | -1.33752 | 0.181562 | 0.301854 | 0.182518 | 0.302908 |
| GART      | -0.20588 | -0.44049 | 0.659739 | 0.767518 | 0.660104 | 0.767943 |

|        |          |          |          |          |          |          |
|--------|----------|----------|----------|----------|----------|----------|
| GAS1   | -0.1016  | -0.16196 | 0.871389 | 0.919517 | 0.87122  | 0.919338 |
| GAS2L1 | -0.29679 | -0.37582 | 0.707182 | 0.803228 | 0.70649  | 0.802636 |
| GAS6   | -0.88345 | -1.91739 | 0.055665 | 0.122887 | 0.055981 | 0.123468 |
| GAS8   | 1.716057 | 1.725187 | 0.08501  | 0.168706 | 0.084015 | 0.166965 |
| GATA2  | 1.682886 | 2.618496 | 0.009056 | 0.028758 | 0.008953 | 0.028515 |
| GATA4  | 1.665285 | 2.305743 | 0.021466 | 0.056969 | 0.021194 | 0.056436 |
| GATA6  | 2.707957 | 4.463567 | 9.64E-06 | 9.75E-05 | 9.41E-06 | 9.59E-05 |
| GATM   | 4.107711 | 4.5245   | 7.30E-06 | 7.72E-05 | 6.86E-06 | 7.40E-05 |
| GBA2   | 0.330618 | 0.560036 | 0.575664 | 0.696417 | 0.575309 | 0.695905 |
| GBAS   | -0.6968  | -1.41149 | 0.15862  | 0.272085 | 0.158854 | 0.272118 |
| GBE1   | -0.38151 | -0.47432 | 0.635446 | 0.746275 | 0.634585 | 0.74545  |
| GBF1   | -1.46148 | -2.47    | 0.013789 | 0.040105 | 0.013698 | 0.03989  |
| GBGT1  | -1.7484  | -3.73464 | 0.000206 | 0.001282 | 0.000209 | 0.001306 |
| GBP2   | -1.06498 | -2.53728 | 0.011425 | 0.034451 | 0.011627 | 0.034985 |
| GC     | 2.518509 | 3.248088 | 0.001227 | 0.005631 | 0.001194 | 0.005501 |
| GCA    | 0.804218 | 1.51551  | 0.130172 | 0.234499 | 0.13013  | 0.23488  |
| GCAT   | 0.432689 | 0.404081 | 0.686298 | 0.78827  | 0.685296 | 0.787697 |
| GCC1   | -0.46796 | -1.29745 | 0.194976 | 0.317419 | 0.197163 | 0.319981 |
| GCC2   | 0.847211 | 1.548838 | 0.12195  | 0.22363  | 0.121814 | 0.223208 |
| GCDH   | -0.74311 | -2.08431 | 0.037556 | 0.089012 | 0.038534 | 0.091102 |
| GCGR   | 0.119084 | 0.155804 | 0.87624  | 0.922963 | 0.875952 | 0.922675 |
| GCHFR  | 0.099277 | 0.104712 | 0.91664  | 0.949295 | 0.916384 | 0.94919  |
| GCLC   | -0.90479 | -2.91556 | 0.003684 | 0.013996 | 0.003967 | 0.014808 |
| GCNT1  | 0.563689 | 0.993289 | 0.320971 | 0.462892 | 0.320658 | 0.462867 |
| GCNT2  | 1.003848 | 1.470036 | 0.142078 | 0.250757 | 0.141354 | 0.249761 |
| GDA    | -4.02147 | -4.10105 | 4.68E-05 | 0.000367 | 4.43E-05 | 0.000352 |
| GDF10  | 0.18246  | 0.453535 | 0.650328 | 0.759012 | 0.651333 | 0.760185 |
| GDF15  | -1.26033 | -1.33109 | 0.183665 | 0.30449  | 0.182321 | 0.302794 |
| GDI2   | -0.47015 | -1.47005 | 0.142074 | 0.250757 | 0.145033 | 0.254729 |
| GEM    | 1.104794 | 2.28298  | 0.022782 | 0.059419 | 0.022884 | 0.059724 |
| GEMIN4 | 0.912032 | 1.290888 | 0.197241 | 0.320108 | 0.196351 | 0.319077 |
| GEMIN7 | -2.17977 | -3.18956 | 0.001499 | 0.006667 | 0.001469 | 0.00654  |
| GFPT1  | -0.44404 | -1.10758 | 0.268489 | 0.406933 | 0.269987 | 0.408675 |
| GFPT2  | 1.968329 | 1.67776  | 0.093917 | 0.181724 | 0.092754 | 0.180479 |
| GFRA1  | -1.02157 | -1.98747 | 0.047326 | 0.107248 | 0.047363 | 0.107229 |
| GFRA2  | -1.1935  | -2.73801 | 0.006365 | 0.021758 | 0.006468 | 0.022076 |
| GFRA3  | -3.93807 | -3.87687 | 0.000118 | 0.000787 | 0.000112 | 0.00075  |
| GGA1   | -0.22437 | -0.55962 | 0.575947 | 0.696417 | 0.577142 | 0.697497 |
| GGA2   | -1.35196 | -4.19022 | 3.21E-05 | 0.000268 | 3.64E-05 | 0.000298 |
| GGCX   | -0.09136 | -0.10222 | 0.918613 | 0.950778 | 0.918378 | 0.950534 |
| GGH    | 0.910211 | 1.18751  | 0.235498 | 0.369193 | 0.234395 | 0.368201 |

|         |          |          |          |          |          |          |
|---------|----------|----------|----------|----------|----------|----------|
| GGPS1   | -0.16238 | -0.31354 | 0.75398  | 0.835064 | 0.754007 | 0.835022 |
| GHITM   | 4.458164 | 6.62365  | 7.82E-11 | 4.13E-09 | 7.22E-11 | 3.90E-09 |
| GHR     | -1.97235 | -2.9728  | 0.00307  | 0.012003 | 0.003021 | 0.0119   |
| GHRL    | -1.56316 | -1.60424 | 0.109189 | 0.204865 | 0.108076 | 0.203264 |
| GIT1    | -0.25973 | -0.37405 | 0.7085   | 0.804336 | 0.707971 | 0.803749 |
| GIT2    | 0.678643 | 1.120021 | 0.263155 | 0.401567 | 0.262624 | 0.40096  |
| GJA4    | 2.310228 | 2.780334 | 0.005601 | 0.019602 | 0.005475 | 0.019261 |
| GJB1    | 2.276144 | 3.610982 | 0.000331 | 0.001911 | 0.000324 | 0.001883 |
| GJB2    | 2.875909 | 3.184402 | 0.001526 | 0.006747 | 0.001478 | 0.00657  |
| GJC1    | 1.851795 | 5.630795 | 2.76E-08 | 6.39E-07 | 3.39E-08 | 7.55E-07 |
| GK2     | 1.930069 | 5.368312 | 1.14E-07 | 2.19E-06 | 1.31E-07 | 2.48E-06 |
| GKN1    | 6.450812 | 4.8625   | 1.48E-06 | 2.05E-05 | 1.35E-06 | 1.92E-05 |
| GLA     | -1.05784 | -1.24069 | 0.215206 | 0.342871 | 0.213944 | 0.341207 |
| GLB1    | -2.16318 | -4.274   | 2.23E-05 | 0.000198 | 2.24E-05 | 0.000199 |
| GLCCI1  | 0.230402 | 0.277134 | 0.781773 | 0.85682  | 0.781205 | 0.856223 |
| GLG1    | -0.95952 | -3.60422 | 0.000339 | 0.001946 | 0.000401 | 0.002248 |
| GLI1    | -1.09529 | -1.32766 | 0.184796 | 0.305749 | 0.183637 | 0.304121 |
| GLI3    | -1.22513 | -1.42927 | 0.153449 | 0.265508 | 0.152311 | 0.264155 |
| GLIPR1  | 0.271382 | 0.478502 | 0.632468 | 0.744182 | 0.632251 | 0.74401  |
| GLIS2   | -0.69039 | -0.97632 | 0.329302 | 0.470574 | 0.328339 | 0.469483 |
| GLIS3   | 3.028108 | 4.503415 | 8.04E-06 | 8.33E-05 | 7.75E-06 | 8.13E-05 |
| GLO1    | 1.053963 | 1.358476 | 0.174825 | 0.293561 | 0.173788 | 0.292134 |
| GLRX    | 1.796696 | 2.902375 | 0.00384  | 0.014358 | 0.003795 | 0.014316 |
| GLRX2   | 0.192369 | 0.390831 | 0.696061 | 0.795789 | 0.696234 | 0.796226 |
| GLS     | -0.65441 | -1.07587 | 0.282421 | 0.422597 | 0.281874 | 0.421913 |
| GLS2    | 1.923201 | 2.888322 | 0.004013 | 0.014922 | 0.003951 | 0.014775 |
| GLT25D1 | -1.69005 | -2.18718 | 0.029116 | 0.072482 | 0.028732 | 0.071602 |
| GLT25D2 | -2.50435 | -2.62135 | 0.008981 | 0.028559 | 0.00877  | 0.028062 |
| GLTP    | 1.720872 | 3.591581 | 0.000356 | 0.002026 | 0.00036  | 0.002047 |
| GLUD1   | 0.730313 | 1.271584 | 0.204015 | 0.32917  | 0.203682 | 0.328547 |
| GLUL    | -1.8175  | -3.66511 | 0.000269 | 0.00162  | 0.000271 | 0.001629 |
| GM2A    | -0.08854 | -0.09826 | 0.921755 | 0.95298  | 0.921526 | 0.952744 |
| GMEB1   | -1.64233 | -2.76205 | 0.005921 | 0.020551 | 0.005871 | 0.020394 |
| GMEB2   | 1.703223 | 3.66002  | 0.000274 | 0.001641 | 0.000279 | 0.001666 |
| GMFB    | 0.184464 | 0.351694 | 0.725192 | 0.817288 | 0.725192 | 0.817167 |
| GMFG    | -1.00639 | -3.65865 | 0.000276 | 0.001644 | 0.000323 | 0.00188  |
| GMIP    | 3.283836 | 4.378939 | 1.41E-05 | 0.000133 | 1.35E-05 | 0.000129 |
| GMPPB   | 0.87315  | 2.234676 | 0.025807 | 0.065706 | 0.02633  | 0.066569 |
| GMPR    | 0.064568 | 0.104539 | 0.916777 | 0.949295 | 0.916675 | 0.94919  |
| GNA11   | -1.55866 | -1.53744 | 0.124715 | 0.22737  | 0.123494 | 0.225494 |
| GNA12   | 2.74432  | 3.679611 | 0.000255 | 0.001543 | 0.000247 | 0.001502 |

|        |          |          |          |          |          |          |
|--------|----------|----------|----------|----------|----------|----------|
| GNAI1  | 0.465242 | 1.188817 | 0.234984 | 0.368771 | 0.236622 | 0.370588 |
| GNAI3  | 0.84262  | 1.828913 | 0.06791  | 0.14192  | 0.068266 | 0.142285 |
| GNAL   | 0.654719 | 0.810046 | 0.418236 | 0.555756 | 0.417042 | 0.554204 |
| GNAO1  | 2.635384 | 3.460693 | 0.000577 | 0.003021 | 0.00056  | 0.002942 |
| GNAS   | 0.494448 | 1.495881 | 0.135212 | 0.242094 | 0.137817 | 0.244985 |
| GNAT1  | 0.462476 | 0.625145 | 0.532114 | 0.659651 | 0.531211 | 0.658931 |
| GNB1   | 2.685016 | 6.692881 | 5.04E-11 | 2.97E-09 | 5.72E-11 | 3.32E-09 |
| GNB2   | -1.0688  | -2.98629 | 0.002939 | 0.0116   | 0.003084 | 0.012079 |
| GNB2L1 | 0.353262 | 1.380935 | 0.167815 | 0.284125 | 0.173773 | 0.292134 |
| GNB3   | -1.54049 | -2.39056 | 0.017131 | 0.047756 | 0.016965 | 0.047264 |
| GNB5   | -0.05976 | -0.11801 | 0.9061   | 0.943294 | 0.90613  | 0.943609 |
| GNG10  | -0.75024 | -0.96407 | 0.335399 | 0.476967 | 0.334231 | 0.47545  |
| GNG11  | -0.35947 | -0.88559 | 0.376195 | 0.515336 | 0.377601 | 0.516509 |
| GNG3   | -2.81538 | -4.53941 | 6.82E-06 | 7.35E-05 | 6.64E-06 | 7.18E-05 |
| GNG7   | -1.30629 | -1.93126 | 0.053923 | 0.119546 | 0.053499 | 0.118717 |
| GNL1   | -0.31158 | -1.14995 | 0.250623 | 0.387095 | 0.256308 | 0.393547 |
| GNL2   | 1.683948 | 3.574126 | 0.00038  | 0.00213  | 0.000385 | 0.002167 |
| GPLY   | 1.82522  | 2.540177 | 0.011332 | 0.03425  | 0.011162 | 0.033825 |
| GNPAT  | 0.972917 | 2.906972 | 0.003785 | 0.014261 | 0.004011 | 0.014936 |
| GNRH1  | 0.433712 | 0.589044 | 0.556054 | 0.680942 | 0.555192 | 0.680064 |
| GNS    | 0.293377 | 0.648468 | 0.516931 | 0.647025 | 0.517567 | 0.646959 |
| GOLGA1 | -0.73359 | -0.82542 | 0.409464 | 0.547506 | 0.408112 | 0.546008 |
| GOLGA2 | 0.313005 | 0.999108 | 0.318147 | 0.460057 | 0.321966 | 0.4639   |
| GOLGA3 | 0.403813 | 1.429917 | 0.153263 | 0.265317 | 0.157677 | 0.270963 |
| GOLGA4 | 2.42917  | 5.734762 | 1.55E-08 | 3.74E-07 | 1.67E-08 | 4.04E-07 |
| GOLGA7 | -0.4499  | -1.34567 | 0.178919 | 0.298621 | 0.181707 | 0.30199  |
| GOLGB1 | 1.588773 | 2.293974 | 0.022138 | 0.058225 | 0.021886 | 0.057854 |
| GOLPH3 | -2.13897 | -3.32513 | 0.000938 | 0.004484 | 0.000921 | 0.004414 |
| GOPC   | 1.702135 | 4.758225 | 2.45E-06 | 3.08E-05 | 2.74E-06 | 3.40E-05 |
| GOSR1  | 0.934713 | 1.965852 | 0.049778 | 0.111898 | 0.049993 | 0.112318 |
| GOSR2  | -0.51835 | -0.93063 | 0.352419 | 0.492519 | 0.352177 | 0.492043 |
| GOT2   | -0.68093 | -0.9623  | 0.336289 | 0.477655 | 0.335325 | 0.476429 |
| GP2    | -0.89125 | -0.93303 | 0.351183 | 0.490946 | 0.349692 | 0.489444 |
| GPA33  | -0.35466 | -0.47808 | 0.632769 | 0.744182 | 0.632016 | 0.74401  |
| GPAA1  | 0.234751 | 0.332434 | 0.739678 | 0.827735 | 0.73918  | 0.827175 |
| GPC1   | 0.1717   | 0.211322 | 0.832708 | 0.891916 | 0.832282 | 0.89146  |
| GPC4   | 0.605604 | 0.787623 | 0.431229 | 0.567566 | 0.430138 | 0.566606 |
| GPC6   | 0.387141 | 0.724568 | 0.469    | 0.604283 | 0.468929 | 0.604122 |
| GPD1   | -2.17199 | -3.75444 | 0.000191 | 0.001195 | 0.000188 | 0.001185 |
| GPHN   | -0.30256 | -0.57169 | 0.567749 | 0.68987  | 0.567718 | 0.689833 |
| GPI    | -0.4563  | -1.18489 | 0.236533 | 0.370693 | 0.238295 | 0.37246  |

|         |          |          |          |          |          |          |
|---------|----------|----------|----------|----------|----------|----------|
| GPKOW   | -0.14462 | -0.43692 | 0.66233  | 0.76977  | 0.664425 | 0.771442 |
| GPM6B   | 1.135179 | 1.811357 | 0.070587 | 0.146021 | 0.070213 | 0.145439 |
| GPNMB   | -0.89467 | -1.60267 | 0.109536 | 0.205025 | 0.10935  | 0.20484  |
| GPR108  | 1.560564 | 2.502317 | 0.012604 | 0.037258 | 0.012489 | 0.036962 |
| GPR109B | 1.714933 | 3.526264 | 0.000454 | 0.002468 | 0.000458 | 0.002487 |
| GPR133  | 1.814168 | 2.95189  | 0.003282 | 0.012728 | 0.003244 | 0.012612 |
| GPR135  | 2.675005 | 3.95539  | 8.56E-05 | 0.000608 | 8.31E-05 | 0.00059  |
| GPR155  | 1.796259 | 4.000541 | 7.11E-05 | 0.000521 | 7.30E-05 | 0.000533 |
| GPR160  | 1.722587 | 2.35815  | 0.018687 | 0.050916 | 0.018434 | 0.050401 |
| GPR3    | 2.335389 | 3.970459 | 8.05E-05 | 0.000576 | 7.92E-05 | 0.000568 |
| GPR35   | 0.65345  | 0.942872 | 0.346127 | 0.487211 | 0.345215 | 0.4873   |
| GPR4    | 2.454628 | 2.466113 | 0.013938 | 0.040413 | 0.013635 | 0.039729 |
| GPR55   | 2.28768  | 5.813614 | 9.95E-09 | 2.57E-07 | 1.11E-08 | 2.86E-07 |
| GPR56   | 0.148778 | 0.172136 | 0.863389 | 0.913925 | 0.86301  | 0.913541 |
| GPR65   | -3.79489 | -8.61318 | 6.32E-17 | 1.56E-14 | 7.02E-17 | 1.74E-14 |
| GPR75   | 1.355492 | 2.113095 | 0.035006 | 0.083944 | 0.034738 | 0.083374 |
| GPRC5B  | 1.642435 | 2.725579 | 0.006607 | 0.022401 | 0.006548 | 0.022285 |
| GPRC5C  | 1.968796 | 3.226006 | 0.001324 | 0.006    | 0.001306 | 0.005927 |
| GPS1    | -0.54611 | -1.17661 | 0.239818 | 0.373722 | 0.24039  | 0.37449  |
| GPSM2   | 2.342039 | 3.213411 | 0.001382 | 0.006229 | 0.00135  | 0.006099 |
| GPSM3   | 1.124264 | 2.385138 | 0.017383 | 0.048315 | 0.017499 | 0.048579 |
| GPT     | 2.54613  | 3.116099 | 0.00192  | 0.00815  | 0.001868 | 0.007983 |
| GPT2    | -1.40834 | -2.11776 | 0.034608 | 0.083285 | 0.034305 | 0.082853 |
| GPX1    | 2.427579 | 6.161822 | 1.32E-09 | 4.47E-08 | 1.49E-09 | 5.04E-08 |
| GPX2    | -0.22172 | -0.22805 | 0.819682 | 0.882388 | 0.819125 | 0.882192 |
| GPX3    | 0.547323 | 1.344221 | 0.179387 | 0.299084 | 0.180647 | 0.300865 |
| GPX4    | 1.615843 | 4.057374 | 5.62E-05 | 0.000427 | 5.93E-05 | 0.000448 |
| GRAP2   | 0.266556 | 0.649873 | 0.516024 | 0.64606  | 0.517197 | 0.646931 |
| GRASP   | 1.355255 | 1.75025  | 0.080588 | 0.16242  | 0.079863 | 0.161166 |
| GRB10   | -1.12835 | -1.88569 | 0.059821 | 0.129269 | 0.059558 | 0.128758 |
| GRB14   | 1.236904 | 2.53143  | 0.011615 | 0.034837 | 0.011669 | 0.035066 |
| GRB2    | 1.965397 | 2.798925 | 0.005293 | 0.018701 | 0.005203 | 0.018421 |
| GRB7    | 3.86519  | 4.570345 | 5.92E-06 | 6.52E-05 | 5.58E-06 | 6.20E-05 |
| GREM1   | 1.307638 | 2.086236 | 0.03738  | 0.088731 | 0.037127 | 0.088136 |
| GRHPR   | 1.768128 | 2.970954 | 0.003088 | 0.012054 | 0.003058 | 0.012008 |
| GRIA3   | -0.49667 | -0.68892 | 0.491143 | 0.622874 | 0.49024  | 0.621729 |
| GRIK3   | 1.245288 | 2.909584 | 0.003754 | 0.014182 | 0.003829 | 0.01441  |
| GRIN1   | 1.271113 | 1.769631 | 0.077298 | 0.157002 | 0.076686 | 0.156096 |
| GRIN2C  | 2.622494 | 3.353035 | 0.00085  | 0.004147 | 0.000825 | 0.004056 |
| GRIN2D  | -0.30761 | -0.40157 | 0.688141 | 0.79     | 0.687445 | 0.789202 |
| GRK5    | 0.591511 | 1.465469 | 0.143318 | 0.252473 | 0.144529 | 0.254225 |

|          |          |          |          |          |          |          |
|----------|----------|----------|----------|----------|----------|----------|
| GRK6     | -2.0956  | -3.32072 | 0.000953 | 0.004545 | 0.000937 | 0.004475 |
| GRM3     | -0.44882 | -0.49732 | 0.619144 | 0.733674 | 0.618115 | 0.733065 |
| GRN      | -1.78779 | -4.7489  | 2.56E-06 | 3.18E-05 | 2.81E-06 | 3.47E-05 |
| GRP      | -0.25761 | -0.27698 | 0.781894 | 0.85682  | 0.781251 | 0.856223 |
| GRSF1    | 2.940457 | 3.942626 | 9.01E-05 | 0.000635 | 8.69E-05 | 0.000613 |
| GSK3B    | 0.51272  | 1.058285 | 0.290353 | 0.432813 | 0.290718 | 0.433219 |
| GSN      | -0.15177 | -0.27619 | 0.7825   | 0.857084 | 0.782417 | 0.856794 |
| GSPT1    | 0.028408 | 0.049384 | 0.960629 | 0.976418 | 0.9606   | 0.976389 |
| GSR      | -2.0564  | -3.65661 | 0.000278 | 0.001654 | 0.000276 | 0.001649 |
| GSS      | -2.99309 | -3.88092 | 0.000116 | 0.000776 | 0.000111 | 0.000749 |
| GSTA4    | -0.23021 | -0.38324 | 0.701681 | 0.799491 | 0.701383 | 0.799152 |
| GSTK1    | 0.732107 | 1.308246 | 0.191292 | 0.312613 | 0.191052 | 0.312536 |
| GSTM2    | -0.85537 | -1.80756 | 0.071178 | 0.147048 | 0.071459 | 0.147695 |
| GSTM3    | -3.78418 | -6.44566 | 2.37E-10 | 1.00E-08 | 2.28E-10 | 1.02E-08 |
| GSTM4    | -1.68227 | -2.585   | 0.009974 | 0.030982 | 0.009858 | 0.030749 |
| GSTM5    | -0.04597 | -0.05234 | 0.958277 | 0.975293 | 0.958158 | 0.975335 |
| GSTO1    | -1.43813 | -4.79983 | 2.01E-06 | 2.61E-05 | 2.47E-06 | 3.12E-05 |
| GSTP1    | 1.934467 | 4.349174 | 1.61E-05 | 0.000148 | 1.66E-05 | 0.000153 |
| GSTT1    | 0.22874  | 0.145277 | 0.884541 | 0.928185 | 0.884088 | 0.92771  |
| GSTZ1    | 0.642414 | 1.394568 | 0.163664 | 0.278695 | 0.164212 | 0.279333 |
| GTF2A1   | 1.142223 | 3.183694 | 0.00153  | 0.006757 | 0.001614 | 0.007054 |
| GTF2A2   | 0.332867 | 0.679824 | 0.496879 | 0.628785 | 0.497159 | 0.628638 |
| GTF2B    | 1.679165 | 2.186779 | 0.029145 | 0.072516 | 0.028765 | 0.071646 |
| GTF2E1   | 0.943169 | 1.205188 | 0.228608 | 0.360919 | 0.227473 | 0.359731 |
| GTF2E2   | 0.80864  | 0.969949 | 0.332464 | 0.474084 | 0.33117  | 0.472382 |
| GTF2F2   | 1.750056 | 4.111583 | 4.48E-05 | 0.000354 | 4.65E-05 | 0.000366 |
| GTF2H1   | -0.93388 | -3.21208 | 0.001389 | 0.006245 | 0.001545 | 0.006801 |
| GTF2H2   | 1.900642 | 2.781351 | 0.005584 | 0.019556 | 0.005497 | 0.019325 |
| GTF2H4   | -0.52106 | -0.49597 | 0.620096 | 0.734119 | 0.618931 | 0.733304 |
| GTF2H5   | 2.297174 | 6.072191 | 2.24E-09 | 7.37E-08 | 2.58E-09 | 8.30E-08 |
| GTF2IRD1 | 0.894463 | 1.087993 | 0.277037 | 0.416663 | 0.275775 | 0.415164 |
| GTF3C1   | 0.642324 | 0.878014 | 0.380289 | 0.518977 | 0.379264 | 0.518331 |
| GTF3C2   | -0.36459 | -0.91539 | 0.360357 | 0.5002   | 0.361907 | 0.501168 |
| GTF3C3   | 0.25853  | 0.394603 | 0.693276 | 0.79415  | 0.692814 | 0.793771 |
| GTF3C4   | 1.54917  | 1.977215 | 0.048476 | 0.109485 | 0.047928 | 0.108298 |
| GTPBP1   | 0.182306 | 0.400904 | 0.688634 | 0.790374 | 0.689064 | 0.790867 |
| GTPBP4   | -1.39374 | -3.06858 | 0.002248 | 0.009326 | 0.002281 | 0.009471 |
| GTPBP5   | 0.386088 | 0.529653 | 0.596549 | 0.714704 | 0.595765 | 0.714476 |
| GTSE1    | 2.617992 | 2.805889 | 0.005181 | 0.01842  | 0.005046 | 0.01805  |
| GUCA1B   | 0.643474 | 0.80238  | 0.422652 | 0.559725 | 0.421476 | 0.558863 |
| GUCY1A3  | -0.98025 | -1.99972 | 0.045982 | 0.104657 | 0.046118 | 0.104865 |

|         |          |          |          |          |          |          |
|---------|----------|----------|----------|----------|----------|----------|
| GUCY1B3 | 2.882894 | 3.449319 | 0.000602 | 0.003124 | 0.000581 | 0.003039 |
| GUCY2C  | -2.42406 | -2.79891 | 0.005293 | 0.018701 | 0.005166 | 0.018338 |
| GUK1    | 0.769207 | 1.279601 | 0.201182 | 0.325492 | 0.200705 | 0.324832 |
| GUSB    | -0.77097 | -0.90364 | 0.36655  | 0.505809 | 0.365229 | 0.504245 |
| GYG2    | 1.096641 | 2.132611 | 0.033363 | 0.081163 | 0.033392 | 0.081149 |
| GZMA    | 0.080897 | 0.122484 | 0.902557 | 0.941415 | 0.902398 | 0.94125  |
| GZMB    | 1.620535 | 2.106799 | 0.035551 | 0.085033 | 0.035115 | 0.084076 |
| GZMH    | -1.73086 | -2.33304 | 0.019977 | 0.053716 | 0.019703 | 0.05325  |
| GZMK    | -0.93375 | -1.05291 | 0.292808 | 0.435505 | 0.291417 | 0.433849 |
| GZMM    | -3.17351 | -3.812   | 0.000152 | 0.000978 | 0.000146 | 0.000944 |
| H1F0    | -1.05162 | -1.66575 | 0.096287 | 0.185028 | 0.095829 | 0.184665 |
| H2AFV   | 0.248648 | 0.44294  | 0.657969 | 0.766218 | 0.65779  | 0.766199 |
| H2AFX   | -0.49407 | -0.93762 | 0.348816 | 0.489041 | 0.348795 | 0.48848  |
| H2AFZ   | 0.407362 | 0.491696 | 0.623114 | 0.736579 | 0.622191 | 0.735488 |
| H3F3B   | 1.754053 | 4.869451 | 1.43E-06 | 2.00E-05 | 1.61E-06 | 2.20E-05 |
| H6PD    | -0.18784 | -0.25294 | 0.8004   | 0.869598 | 0.799967 | 0.869127 |
| HAAO    | -0.00968 | -0.01366 | 0.989106 | 0.992561 | 0.989085 | 0.992529 |
| HABP4   | -0.98058 | -1.71448 | 0.086959 | 0.171651 | 0.086735 | 0.171067 |
| HADHA   | -1.26926 | -4.37311 | 1.44E-05 | 0.000136 | 1.75E-05 | 0.00016  |
| HAGH    | -0.6003  | -1.06071 | 0.289252 | 0.431719 | 0.28895  | 0.431406 |
| HARS2   | 1.046256 | 2.975161 | 0.003047 | 0.011932 | 0.003206 | 0.012482 |
| HAS3    | 0.035798 | 0.043223 | 0.965538 | 0.97929  | 0.965446 | 0.979197 |
| HAT1    | 0.028485 | 0.036227 | 0.971113 | 0.981978 | 0.971042 | 0.981906 |
| HBB     | 2.939557 | 3.136763 | 0.001792 | 0.007705 | 0.001735 | 0.007501 |
| HBEGF   | 3.89994  | 5.494429 | 5.81E-08 | 1.21E-06 | 5.45E-08 | 1.16E-06 |
| HBS1L   | 0.308898 | 0.88279  | 0.377705 | 0.516651 | 0.380314 | 0.518999 |
| HBXIP   | 0.481984 | 0.578664 | 0.563034 | 0.686092 | 0.56199  | 0.685531 |
| HBZ     | -6.7157  | -11.346  | 3.71E-27 | 8.71E-24 | 3.19E-27 | 7.50E-24 |
| HCCS    | -0.02381 | -0.03967 | 0.968372 | 0.979947 | 0.968339 | 0.979949 |
| HCFC1   | -0.81895 | -2.65855 | 0.008058 | 0.02636  | 0.008592 | 0.027608 |
| HCFC1R1 | -1.53665 | -5.61803 | 2.96E-08 | 6.62E-07 | 4.22E-08 | 9.14E-07 |
| HCG9    | 1.222105 | 2.317412 | 0.020818 | 0.055657 | 0.02081  | 0.055603 |
| HCK     | -0.5733  | -0.61565 | 0.538362 | 0.664994 | 0.537132 | 0.663998 |
| HCLS1   | 0.277857 | 0.635004 | 0.525669 | 0.654537 | 0.526465 | 0.655641 |
| HCN2    | -0.82341 | -0.98113 | 0.326924 | 0.467887 | 0.325618 | 0.466629 |
| HCP5    | 1.760663 | 2.663866 | 0.007933 | 0.026074 | 0.00783  | 0.025791 |
| HCST    | 0.737502 | 2.059696 | 0.03986  | 0.093464 | 0.040861 | 0.095261 |
| HDAC1   | 1.419296 | 4.400091 | 1.28E-05 | 0.000124 | 1.47E-05 | 0.000138 |
| HDAC2   | 1.258401 | 2.785088 | 0.005521 | 0.01935  | 0.005592 | 0.019598 |
| HDAC3   | -0.62564 | -1.19637 | 0.232025 | 0.365211 | 0.232036 | 0.365717 |
| HDAC4   | -0.61512 | -0.854   | 0.393449 | 0.532448 | 0.392465 | 0.531274 |

|           |          |          |          |          |          |          |
|-----------|----------|----------|----------|----------|----------|----------|
| HDAC6     | 0.973575 | 2.54504  | 0.011177 | 0.033912 | 0.01149  | 0.03464  |
| HDGF      | 0.544241 | 1.296124 | 0.195433 | 0.317832 | 0.196533 | 0.319077 |
| HDGFRP3   | -0.10485 | -0.17268 | 0.862965 | 0.913925 | 0.862812 | 0.913541 |
| HDLBP     | 0.765811 | 1.120391 | 0.262997 | 0.401567 | 0.262128 | 0.400521 |
| HECA      | 1.836013 | 4.263521 | 2.34E-05 | 0.000206 | 2.43E-05 | 0.000212 |
| HECTD1    | 1.257852 | 1.321717 | 0.186768 | 0.307787 | 0.18541  | 0.305892 |
| HELZ      | -1.23463 | -2.03311 | 0.042483 | 0.098069 | 0.042249 | 0.097626 |
| HERC1     | -0.76843 | -0.82454 | 0.409961 | 0.547858 | 0.408543 | 0.546274 |
| HERC2     | 0.496541 | 0.770386 | 0.441375 | 0.577041 | 0.440692 | 0.576148 |
| HERC3     | -0.61715 | -0.77073 | 0.441173 | 0.576938 | 0.440018 | 0.575587 |
| HERPUD1   | -1.69196 | -3.18626 | 0.001516 | 0.006717 | 0.001514 | 0.006693 |
| HES1      | 4.497391 | 11.14888 | 2.34E-26 | 3.67E-23 | 3.07E-26 | 4.81E-23 |
| HES2      | -2.00902 | -2.90131 | 0.003853 | 0.014394 | 0.003786 | 0.014292 |
| HEXA      | -0.09306 | -0.26541 | 0.790786 | 0.862604 | 0.791895 | 0.863011 |
| HEXB      | -2.49776 | -5.86518 | 7.43E-09 | 2.03E-07 | 7.98E-09 | 2.17E-07 |
| HEY1      | -1.12077 | -1.62596 | 0.104485 | 0.198016 | 0.103838 | 0.197108 |
| HEY2      | 3.186499 | 4.65285  | 4.03E-06 | 4.69E-05 | 3.87E-06 | 4.54E-05 |
| HFE       | -1.27301 | -2.21284 | 0.027285 | 0.068578 | 0.027169 | 0.068358 |
| HGD       | 0.762381 | 0.830086 | 0.406821 | 0.544747 | 0.40542  | 0.543025 |
| HHEX      | -0.52319 | -0.9122  | 0.362029 | 0.501336 | 0.361681 | 0.501002 |
| HIBCH     | -1.05668 | -1.56889 | 0.117202 | 0.216785 | 0.116563 | 0.215858 |
| HIF1A     | -0.30111 | -0.78543 | 0.43251  | 0.568773 | 0.434273 | 0.570176 |
| HINT1     | -0.72883 | -1.25778 | 0.208964 | 0.335198 | 0.208599 | 0.334841 |
| HIP1      | -1.32998 | -1.54103 | 0.123839 | 0.226036 | 0.12279  | 0.224296 |
| HIPK3     | 1.477261 | 3.419331 | 0.00067  | 0.003422 | 0.000688 | 0.003497 |
| HIRIP3    | -0.87932 | -1.82708 | 0.068187 | 0.142244 | 0.068412 | 0.142398 |
| HIST1H1A  | 1.839895 | 1.812483 | 0.070413 | 0.145853 | 0.069503 | 0.14435  |
| HIST1H1C  | 1.744651 | 2.481831 | 0.013344 | 0.039029 | 0.013163 | 0.038642 |
| HIST1H2AC | 0.028394 | 0.041407 | 0.966986 | 0.979947 | 0.966925 | 0.979949 |
| HIST1H2AE | 1.109064 | 2.594733 | 0.009699 | 0.030349 | 0.009859 | 0.030749 |
| HIST1H2AM | 1.846372 | 2.171466 | 0.030288 | 0.074688 | 0.029836 | 0.073766 |
| HIST1H2BD | 1.312945 | 2.168646 | 0.030503 | 0.075139 | 0.030318 | 0.074801 |
| HIST1H2BK | -0.01825 | -0.03214 | 0.97437  | 0.982741 | 0.974353 | 0.982725 |
| HIST1H2BL | 0.807817 | 1.293835 | 0.196222 | 0.318589 | 0.195638 | 0.318249 |
| HIST1H4B  | 1.54806  | 2.720805 | 0.006702 | 0.022645 | 0.006664 | 0.022575 |
| HIST1H4C  | 0.604334 | 1.316951 | 0.188359 | 0.30974  | 0.188954 | 0.31041  |
| HIST1H4J  | -0.13235 | -0.2521  | 0.801047 | 0.869618 | 0.801046 | 0.869306 |
| HIST2H2BE | 0.436569 | 0.730747 | 0.46522  | 0.601688 | 0.464767 | 0.601103 |
| HIST3H2A  | -1.55209 | -1.56088 | 0.119081 | 0.219298 | 0.117903 | 0.217567 |
| HIVEP1    | 0.796788 | 0.888415 | 0.374675 | 0.513852 | 0.373282 | 0.512241 |
| HIVEP2    | 0.124674 | 0.396384 | 0.691963 | 0.793419 | 0.694237 | 0.794298 |



|          |          |          |          |          |          |          |
|----------|----------|----------|----------|----------|----------|----------|
| HK2      | 2.247817 | 5.340736 | 1.32E-07 | 2.46E-06 | 1.41E-07 | 2.63E-06 |
| HKR1     | 0.008975 | 0.028034 | 0.977644 | 0.984768 | 0.977809 | 0.984934 |
| HLA-C    | 0.842875 | 0.811174 | 0.417588 | 0.555367 | 0.41605  | 0.553678 |
| HLA-DMA  | -2.51047 | -4.46322 | 9.65E-06 | 9.75E-05 | 9.53E-06 | 9.67E-05 |
| HLA-DOA  | -1.43587 | -1.62948 | 0.103738 | 0.196917 | 0.102751 | 0.195518 |
| HLA-DOB  | 0.494479 | 0.463285 | 0.643329 | 0.753275 | 0.642212 | 0.751968 |
| HLA-DPA1 | 1.701942 | 3.616373 | 0.000324 | 0.001876 | 0.000329 | 0.001892 |
| HLA-DPB1 | -1.68944 | -2.34393 | 0.019408 | 0.052484 | 0.019155 | 0.05192  |
| HLA-DQA1 | 2.690647 | 3.049119 | 0.002397 | 0.009863 | 0.002328 | 0.009632 |
| HLA-DQB1 | -1.28572 | -1.72729 | 0.084631 | 0.168189 | 0.083938 | 0.166955 |
| HLA-DRB1 | -1.13466 | -0.81619 | 0.414719 | 0.552488 | 0.412943 | 0.550228 |
| HLA-F    | 0.304611 | 0.382898 | 0.701932 | 0.799575 | 0.701221 | 0.799152 |
| HLA-G    | 2.240851 | 2.804287 | 0.005207 | 0.018497 | 0.005094 | 0.018135 |
| HLF      | -1.47766 | -1.71541 | 0.086788 | 0.171389 | 0.085911 | 0.169942 |
| HM13     | -2.73511 | -4.235   | 2.65E-05 | 0.000228 | 2.57E-05 | 0.000223 |
| HMG20A   | -0.60384 | -0.78038 | 0.435474 | 0.571233 | 0.434375 | 0.570176 |
| HMGA1    | 2.701312 | 5.217304 | 2.51E-07 | 4.36E-06 | 2.51E-07 | 4.35E-06 |
| HMGA2    | 2.304209 | 4.254014 | 2.44E-05 | 0.000212 | 2.42E-05 | 0.000212 |
| HMGB1    | 0.943128 | 2.261588 | 0.024081 | 0.062158 | 0.024441 | 0.062885 |
| HMGB3    | 0.292032 | 0.461048 | 0.644932 | 0.754212 | 0.644472 | 0.753789 |
| HMGCL    | 0.443025 | 0.671742 | 0.502007 | 0.631709 | 0.501312 | 0.631274 |
| HMGCR    | 0.350413 | 0.532442 | 0.594618 | 0.712935 | 0.594023 | 0.712585 |
| HMGCS1   | 0.54944  | 1.064228 | 0.287655 | 0.429479 | 0.287722 | 0.429709 |
| HMGCS2   | 2.333984 | 2.19285  | 0.028703 | 0.071604 | 0.02817  | 0.070351 |
| HMGN3    | 1.032734 | 2.585784 | 0.009951 | 0.030933 | 0.010187 | 0.031603 |
| HMGN4    | -0.43743 | -0.83815 | 0.40228  | 0.5398   | 0.4023   | 0.539869 |
| HMOX1    | 1.078374 | 1.135414 | 0.256657 | 0.394082 | 0.255192 | 0.392475 |
| HNF4A    | 1.430831 | 2.397898 | 0.016795 | 0.046958 | 0.016684 | 0.046675 |
| HNMT     | -0.43249 | -0.70232 | 0.482756 | 0.616061 | 0.482224 | 0.615717 |
| HNRPLL   | 0.451427 | 0.666198 | 0.505542 | 0.634628 | 0.504786 | 0.633849 |
| HOMER1   | -0.27705 | -0.62665 | 0.531127 | 0.658683 | 0.531864 | 0.659559 |
| HOMER2   | 0.357372 | 0.518082 | 0.604592 | 0.721397 | 0.603918 | 0.720592 |
| HOMER3   | -1.46727 | -2.03868 | 0.041921 | 0.097058 | 0.041495 | 0.096406 |
| HOOK1    | 2.899087 | 6.874771 | 1.57E-11 | 1.12E-09 | 1.73E-11 | 1.21E-09 |
| HOOK2    | 1.618319 | 2.696462 | 0.007205 | 0.024121 | 0.007144 | 0.023932 |
| HOXA2    | 0.798431 | 1.72273  | 0.085454 | 0.169437 | 0.085838 | 0.169869 |
| HOXA4    | -2.22171 | -2.55451 | 0.01088  | 0.033119 | 0.010658 | 0.032654 |
| HOXA5    | -1.4472  | -1.67881 | 0.093711 | 0.18155  | 0.092796 | 0.180479 |
| HOXB13   | 0.592037 | 0.80638  | 0.420345 | 0.557927 | 0.419337 | 0.556747 |
| HOXB2    | 0.626372 | 0.728822 | 0.466396 | 0.602711 | 0.465156 | 0.601296 |
| HOXB4    | 1.993449 | 2.691154 | 0.00732  | 0.024399 | 0.00719  | 0.024019 |

|          |          |          |          |          |          |          |
|----------|----------|----------|----------|----------|----------|----------|
| HOXB7    | 0.759075 | 0.706188 | 0.480346 | 0.613819 | 0.478863 | 0.612924 |
| HOXC9    | -0.43944 | -0.47054 | 0.638139 | 0.748503 | 0.637119 | 0.747482 |
| HPCA     | 0.669337 | 0.810669 | 0.417878 | 0.555595 | 0.416648 | 0.554116 |
| HPCAL1   | -1.68663 | -2.34875 | 0.019161 | 0.052019 | 0.018913 | 0.051442 |
| HPGD     | 4.741674 | 5.736344 | 1.54E-08 | 3.73E-07 | 1.41E-08 | 3.52E-07 |
| HPRT1    | 0.185749 | 0.244394 | 0.80701  | 0.873146 | 0.806571 | 0.872931 |
| HPS1     | 3.877692 | 4.096257 | 4.78E-05 | 0.000374 | 4.53E-05 | 0.000359 |
| HPS5     | 0.126404 | 0.179984 | 0.857226 | 0.910294 | 0.856949 | 0.91     |
| HRAS     | -0.28759 | -0.65163 | 0.51489  | 0.644813 | 0.515654 | 0.64577  |
| HS2ST1   | 1.871032 | 4.858156 | 1.52E-06 | 2.09E-05 | 1.65E-06 | 2.25E-05 |
| HS3ST2   | 0.374834 | 0.51961  | 0.603528 | 0.720646 | 0.602772 | 0.720139 |
| HS3ST3A1 | 1.475497 | 2.674535 | 0.007688 | 0.025392 | 0.007661 | 0.02536  |
| HS3ST3B1 | -0.9438  | -1.46557 | 0.14329  | 0.252473 | 0.142693 | 0.251748 |
| HS6ST1   | 0.603892 | 0.779084 | 0.436238 | 0.571917 | 0.435137 | 0.570631 |
| HSBP1    | -0.1842  | -0.27843 | 0.780781 | 0.8562   | 0.78043  | 0.855815 |
| HSD11B2  | 2.574828 | 3.433619 | 0.000637 | 0.00326  | 0.000619 | 0.003185 |
| HSD17B2  | -0.74146 | -0.75675 | 0.449496 | 0.584731 | 0.448062 | 0.583512 |
| HSD17B3  | 1.684077 | 2.147121 | 0.032185 | 0.078738 | 0.031764 | 0.077848 |
| HSD17B4  | 3.449884 | 6.434934 | 2.53E-10 | 1.06E-08 | 2.50E-10 | 1.07E-08 |
| HSF2     | -0.80715 | -1.56073 | 0.119117 | 0.219298 | 0.119161 | 0.219375 |
| HSF2BP   | -0.80585 | -1.11526 | 0.265188 | 0.403883 | 0.264187 | 0.402489 |
| HSF4     | 0.691315 | 1.173859 | 0.240919 | 0.375064 | 0.240487 | 0.374516 |
| HSPA14   | -0.91444 | -0.99977 | 0.317827 | 0.459902 | 0.316388 | 0.458392 |
| HSPA1L   | 0.858968 | 0.973287 | 0.330804 | 0.472003 | 0.329418 | 0.470312 |
| HSPA5    | -0.69616 | -1.54128 | 0.123778 | 0.226036 | 0.124352 | 0.226357 |
| HSPA8    | 0.525824 | 1.439508 | 0.15053  | 0.262034 | 0.152434 | 0.264272 |
| HSPB2    | -0.5424  | -0.61979 | 0.535634 | 0.662669 | 0.534475 | 0.661699 |
| HSPB3    | 1.258975 | 1.941348 | 0.052686 | 0.117468 | 0.052322 | 0.11688  |
| HSPB7    | -0.56021 | -0.70482 | 0.481197 | 0.614521 | 0.480101 | 0.613552 |
| HSPBP1   | -4.08532 | -5.59945 | 3.28E-08 | 7.24E-07 | 3.06E-08 | 6.95E-07 |
| HSPD1    | -2.90639 | -5.70585 | 1.82E-08 | 4.35E-07 | 1.83E-08 | 4.39E-07 |
| HSPH1    | 0.901436 | 1.240832 | 0.215154 | 0.342871 | 0.214182 | 0.34147  |
| HTATIP2  | 0.390347 | 0.792948 | 0.428122 | 0.565112 | 0.428398 | 0.565422 |
| HTATSFI  | 0.843579 | 2.69578  | 0.00722  | 0.024152 | 0.007688 | 0.025427 |
| HTR2A    | 1.42256  | 2.904719 | 0.003812 | 0.01432  | 0.003833 | 0.014413 |
| HTR2B    | 1.389755 | 1.873806 | 0.061445 | 0.131928 | 0.06087  | 0.131174 |
| HTR3A    | -1.38197 | -2.04488 | 0.041304 | 0.095818 | 0.040946 | 0.095364 |
| HYAL1    | 1.098033 | 1.533122 | 0.125775 | 0.228328 | 0.124998 | 0.227269 |
| HYAL2    | -0.82178 | -1.86465 | 0.06272  | 0.134115 | 0.063199 | 0.134772 |
| HYOU1    | -0.99547 | -1.39469 | 0.163628 | 0.278695 | 0.16277  | 0.277583 |
| IARS     | -2.78829 | -5.26304 | 1.98E-07 | 3.52E-06 | 1.97E-07 | 3.50E-06 |

|        |          |          |          |          |          |          |
|--------|----------|----------|----------|----------|----------|----------|
| IBTK   | -1.05874 | -1.84506 | 0.065523 | 0.138222 | 0.065325 | 0.137866 |
| ICA1   | -0.21416 | -0.28517 | 0.77561  | 0.851722 | 0.775115 | 0.851177 |
| ICAM3  | -0.89747 | -1.49138 | 0.136388 | 0.243458 | 0.13597  | 0.242896 |
| ICMT   | 1.959385 | 2.168814 | 0.03049  | 0.075139 | 0.030004 | 0.074103 |
| ICOS   | -0.2372  | -0.34052 | 0.733582 | 0.823855 | 0.73309  | 0.8235   |
| ICOSLG | 0.246965 | 0.376595 | 0.706608 | 0.80277  | 0.706162 | 0.802457 |
| ICT1   | 1.731016 | 3.014755 | 0.002681 | 0.010776 | 0.002661 | 0.010703 |
| ID2    | 0.261625 | 0.348061 | 0.727917 | 0.819456 | 0.727323 | 0.818783 |
| ID3    | -0.66854 | -1.12589 | 0.260665 | 0.398805 | 0.260201 | 0.398224 |
| ID4    | 0.016909 | 0.031203 | 0.975118 | 0.983066 | 0.975111 | 0.983059 |
| IDE    | 5.887631 | 6.514626 | 1.55E-10 | 7.35E-09 | 1.36E-10 | 6.75E-09 |
| IDH2   | 1.791845 | 4.243363 | 2.55E-05 | 0.00022  | 2.66E-05 | 0.000228 |
| IDH3A  | -0.17052 | -0.19177 | 0.847988 | 0.902319 | 0.847554 | 0.902208 |
| IDH3G  | -0.27091 | -0.42057 | 0.674218 | 0.778581 | 0.673761 | 0.778053 |
| IDI1   | -0.24391 | -0.47182 | 0.637224 | 0.747617 | 0.637268 | 0.747482 |
| IDS    | 2.003707 | 3.533614 | 0.000442 | 0.002405 | 0.000438 | 0.002392 |
| IDUA   | 2.60545  | 2.691465 | 0.007313 | 0.024394 | 0.007131 | 0.023905 |
| IER2   | 1.399557 | 4.102581 | 4.65E-05 | 0.000366 | 5.15E-05 | 0.000397 |
| IER5   | -0.79888 | -1.09734 | 0.272934 | 0.411811 | 0.271913 | 0.410666 |
| IFI27  | 6.68868  | 10.03193 | 5.39E-22 | 3.62E-19 | 4.52E-22 | 3.03E-19 |
| IFI30  | 0.282352 | 0.509642 | 0.610491 | 0.726959 | 0.610327 | 0.726764 |
| IFI35  | 0.225685 | 0.603461 | 0.546431 | 0.672056 | 0.548135 | 0.673173 |
| IFI44L | 1.05137  | 1.163709 | 0.245006 | 0.380042 | 0.24362  | 0.378143 |
| IFIH1  | 1.030111 | 1.998316 | 0.046135 | 0.104902 | 0.046166 | 0.104877 |
| IFIT1  | 2.555918 | 2.372457 | 0.017986 | 0.049667 | 0.0176   | 0.04883  |
| IFIT2  | 1.949512 | 2.721131 | 0.006695 | 0.022639 | 0.006583 | 0.022371 |
| IFITM2 | 1.002825 | 2.118433 | 0.03455  | 0.083233 | 0.034729 | 0.083374 |
| IFNAR1 | 0.233526 | 0.313454 | 0.754045 | 0.835064 | 0.753514 | 0.834672 |
| IFNGR1 | -2.18893 | -3.14398 | 0.001749 | 0.007554 | 0.001714 | 0.007436 |
| IFNGR2 | -1.12131 | -1.57213 | 0.116448 | 0.215645 | 0.115706 | 0.214586 |
| IFRD2  | -1.4699  | -1.76231 | 0.078527 | 0.158984 | 0.077729 | 0.157808 |
| IGBP1  | -0.573   | -0.83921 | 0.401686 | 0.539562 | 0.400832 | 0.538557 |
| IGF1   | 1.198654 | 2.216885 | 0.027006 | 0.067967 | 0.026964 | 0.067916 |
| IGF1R  | -0.4032  | -0.46199 | 0.644254 | 0.753795 | 0.643316 | 0.753072 |
| IGF2R  | -0.13305 | -0.27006 | 0.787209 | 0.859239 | 0.787332 | 0.859373 |
| IGFBP1 | -0.71793 | -1.09568 | 0.273661 | 0.412749 | 0.272898 | 0.411721 |
| IGFBP2 | 2.727328 | 3.112123 | 0.001946 | 0.008236 | 0.001889 | 0.008048 |
| IGFBP3 | 1.425771 | 1.746508 | 0.081236 | 0.163376 | 0.080446 | 0.161995 |
| IGFBP5 | 1.040375 | 1.6354   | 0.102491 | 0.195024 | 0.102004 | 0.194332 |
| IGFBP6 | -0.72448 | -0.77772 | 0.437041 | 0.572489 | 0.435653 | 0.571149 |
| IGFBP7 | 1.506834 | 3.018211 | 0.002651 | 0.010695 | 0.002662 | 0.010703 |

|         |          |          |          |          |          |          |
|---------|----------|----------|----------|----------|----------|----------|
| IGHMBP2 | -1.06674 | -1.73135 | 0.083906 | 0.167028 | 0.083527 | 0.166347 |
| IGSF3   | 2.926233 | 5.183006 | 2.99E-07 | 5.07E-06 | 2.94E-07 | 5.01E-06 |
| IGSF8   | -0.53652 | -1.31205 | 0.190008 | 0.311488 | 0.191264 | 0.312676 |
| IK      | 1.449624 | 4.754989 | 2.49E-06 | 3.12E-05 | 3.01E-06 | 3.69E-05 |
| IKBKB   | -2.45429 | -4.46674 | 9.50E-06 | 9.64E-05 | 9.41E-06 | 9.59E-05 |
| IL10RB  | -0.43526 | -0.72161 | 0.470818 | 0.605927 | 0.47034  | 0.60532  |
| IL11RA  | 0.265781 | 0.394609 | 0.693272 | 0.79415  | 0.692765 | 0.793771 |
| IL15    | -1.51608 | -2.86121 | 0.004368 | 0.015951 | 0.004363 | 0.015959 |
| IL15RA  | 0.906275 | 1.633147 | 0.102964 | 0.195686 | 0.1028   | 0.195532 |
| IL16    | -0.30105 | -0.34447 | 0.730614 | 0.8217   | 0.729879 | 0.82107  |
| IL18    | 4.336334 | 10.6599  | 2.08E-24 | 1.95E-21 | 2.65E-24 | 2.49E-21 |
| IL18R1  | 0.112652 | 0.135432 | 0.892316 | 0.933634 | 0.89203  | 0.933409 |
| IL18RAP | 1.121156 | 1.285266 | 0.199197 | 0.322657 | 0.197927 | 0.320999 |
| IL1A    | 1.441    | 2.25836  | 0.024283 | 0.062527 | 0.024078 | 0.062043 |
| IL1B    | 2.889681 | 2.817501 | 0.005    | 0.017925 | 0.004859 | 0.017498 |
| IL1F5   | -0.8268  | -1.33645 | 0.18191  | 0.302233 | 0.181365 | 0.301634 |
| IL1R1   | 1.030034 | 3.050719 | 0.002384 | 0.009824 | 0.002535 | 0.010316 |
| IL1R2   | 2.665167 | 4.506171 | 7.94E-06 | 8.29E-05 | 7.78E-06 | 8.14E-05 |
| IL1RAP  | 0.443903 | 0.920506 | 0.357679 | 0.497807 | 0.358067 | 0.498346 |
| IL23A   | 2.090945 | 2.232152 | 0.025974 | 0.065918 | 0.025524 | 0.065196 |
| IL27RA  | 0.427866 | 0.60929  | 0.542564 | 0.668778 | 0.541773 | 0.667697 |
| IL2RA   | 1.743467 | 4.006992 | 6.93E-05 | 0.000509 | 7.15E-05 | 0.000525 |
| IL2RG   | -2.27516 | -3.23212 | 0.001296 | 0.005892 | 0.001268 | 0.005768 |
| IL4R    | 2.123932 | 5.3438   | 1.30E-07 | 2.44E-06 | 1.42E-07 | 2.63E-06 |
| IL6ST   | 1.435629 | 2.928113 | 0.00354  | 0.013549 | 0.00356  | 0.013626 |
| IL7R    | 0.615624 | 0.790012 | 0.429834 | 0.566545 | 0.428717 | 0.565563 |
| ILF2    | 0.683524 | 1.937809 | 0.053117 | 0.118081 | 0.054385 | 0.1204   |
| ILF3    | -0.65923 | -0.93817 | 0.348536 | 0.488845 | 0.347591 | 0.48781  |
| ILK     | -0.86941 | -1.85075 | 0.064698 | 0.137011 | 0.064986 | 0.137459 |
| ILVBL   | -1.17126 | -2.7339  | 0.006444 | 0.021948 | 0.00656  | 0.022309 |
| IMMT    | 0.155281 | 0.342639 | 0.731991 | 0.822855 | 0.732377 | 0.823092 |
| IMP4    | -0.38599 | -1.45674 | 0.145713 | 0.255733 | 0.150866 | 0.262133 |
| IMPA1   | -1.52043 | -3.54497 | 0.000423 | 0.002325 | 0.000435 | 0.002382 |
| IMPA2   | -0.98547 | -1.11066 | 0.26716  | 0.405835 | 0.265782 | 0.404264 |
| IMPDH1  | 1.530596 | 4.128693 | 4.17E-05 | 0.000336 | 4.49E-05 | 0.000357 |
| IMPDH2  | -1.24012 | -1.85063 | 0.064716 | 0.137011 | 0.064256 | 0.136161 |
| ING1    | -0.29516 | -0.9483  | 0.343362 | 0.485793 | 0.347247 | 0.487712 |
| ING3    | 0.034456 | 0.055052 | 0.956115 | 0.974148 | 0.956058 | 0.974173 |
| ING5    | 2.187297 | 4.68464  | 3.47E-06 | 4.14E-05 | 3.56E-06 | 4.23E-05 |
| INHBA   | 0.544576 | 1.207574 | 0.227688 | 0.35983  | 0.228409 | 0.36097  |
| INHBB   | 1.729131 | 2.441566 | 0.014912 | 0.042633 | 0.014712 | 0.042188 |

|          |          |          |          |          |          |          |
|----------|----------|----------|----------|----------|----------|----------|
| INPP1    | 0.443281 | 0.675346 | 0.499717 | 0.630685 | 0.499031 | 0.630026 |
| INPP5A   | 0.407278 | 0.890226 | 0.373702 | 0.512968 | 0.374364 | 0.513426 |
| INPP5B   | 0.201445 | 0.290335 | 0.771661 | 0.848574 | 0.771239 | 0.84826  |
| INPP5D   | 1.112115 | 2.295292 | 0.022062 | 0.05809  | 0.02216  | 0.058315 |
| INPP5E   | -3.6004  | -4.6794  | 3.56E-06 | 4.24E-05 | 3.37E-06 | 4.04E-05 |
| INPPL1   | -1.93873 | -3.07472 | 0.002203 | 0.009155 | 0.002172 | 0.009067 |
| INSIG1   | -1.61914 | -2.03589 | 0.042201 | 0.097563 | 0.041687 | 0.09666  |
| INSM1    | 1.085498 | 1.604976 | 0.109027 | 0.204725 | 0.108402 | 0.203714 |
| INVS     | -0.3671  | -0.49208 | 0.622843 | 0.736443 | 0.622064 | 0.735488 |
| IPO11    | 0.768164 | 2.258204 | 0.024293 | 0.062527 | 0.025157 | 0.0644   |
| IPO8     | 1.069249 | 1.895511 | 0.058507 | 0.127188 | 0.058353 | 0.127001 |
| IQCE     | 1.985982 | 2.922211 | 0.003607 | 0.01376  | 0.003547 | 0.013596 |
| IQGAP1   | -0.85045 | -1.12674 | 0.260305 | 0.398438 | 0.259213 | 0.3971   |
| IQGAP2   | 0.97557  | 1.757273 | 0.079383 | 0.160415 | 0.079238 | 0.160111 |
| IQGAP3   | 1.373037 | 3.87083  | 0.00012  | 0.000803 | 0.00013  | 0.000858 |
| IRAK1    | -1.93587 | -5.55697 | 4.14E-08 | 8.92E-07 | 4.88E-08 | 1.05E-06 |
| IRAK2    | -0.24302 | -0.38026 | 0.70389  | 0.800262 | 0.703482 | 0.800064 |
| IREB2    | 2.109493 | 2.885738 | 0.004046 | 0.015008 | 0.003967 | 0.014808 |
| IRF1     | 0.383189 | 0.917712 | 0.35914  | 0.499288 | 0.360361 | 0.500404 |
| IRF2     | 1.895807 | 4.504003 | 8.02E-06 | 8.32E-05 | 8.42E-06 | 8.66E-05 |
| IRF3     | 1.046095 | 2.750443 | 0.006132 | 0.021082 | 0.006335 | 0.021653 |
| IRF4     | -1.63856 | -3.33061 | 0.00092  | 0.00443  | 0.000926 | 0.004432 |
| IRF5     | 0.270621 | 0.293412 | 0.769309 | 0.847574 | 0.768636 | 0.847032 |
| IRF7     | 1.484802 | 1.835996 | 0.066855 | 0.140254 | 0.066156 | 0.139058 |
| IRF8     | 0.82093  | 1.049638 | 0.294309 | 0.436494 | 0.293132 | 0.435238 |
| IRX3     | -2.02906 | -2.76492 | 0.005869 | 0.020449 | 0.005762 | 0.020151 |
| IRX5     | 1.266777 | 1.719556 | 0.086031 | 0.170343 | 0.085346 | 0.169108 |
| ISG20    | -0.98846 | -2.26156 | 0.024083 | 0.062158 | 0.024354 | 0.062721 |
| ISLR     | 0.195668 | 0.256688 | 0.797508 | 0.867057 | 0.797046 | 0.866755 |
| ISYNA1   | -0.75372 | -1.55746 | 0.11989  | 0.220455 | 0.120172 | 0.220801 |
| ITCH     | 0.292965 | 0.764636 | 0.44479  | 0.580376 | 0.446539 | 0.582173 |
| ITGA10   | 4.328487 | 3.977199 | 7.83E-05 | 0.000563 | 7.40E-05 | 0.00054  |
| ITGA2    | 0.609179 | 1.156442 | 0.247962 | 0.384121 | 0.247943 | 0.38409  |
| ITGA6    | 1.314625 | 2.180935 | 0.029577 | 0.073351 | 0.029401 | 0.072997 |
| ITGA7    | -0.74776 | -1.73758 | 0.0828   | 0.165389 | 0.083455 | 0.166309 |
| ITGA8    | -4.63575 | -8.90771 | 6.23E-18 | 1.95E-15 | 6.14E-18 | 2.06E-15 |
| ITGAE    | -0.09292 | -0.1611  | 0.872068 | 0.919993 | 0.871971 | 0.919925 |
| ITGAV    | 2.340736 | 4.578801 | 5.69E-06 | 6.29E-05 | 5.71E-06 | 6.32E-05 |
| ITGAX    | 0.161073 | 0.27292  | 0.785009 | 0.858232 | 0.784814 | 0.858019 |
| ITGB1BP1 | -1.02055 | -1.86819 | 0.062224 | 0.133175 | 0.062131 | 0.133098 |
| ITGB2    | 0.014052 | 0.034335 | 0.972622 | 0.982024 | 0.972699 | 0.982102 |

|          |          |          |          |          |          |          |
|----------|----------|----------|----------|----------|----------|----------|
| ITGB3    | -0.59325 | -0.8619  | 0.38909  | 0.527885 | 0.38821  | 0.527126 |
| ITGB3BP  | 0.940073 | 1.937715 | 0.053128 | 0.118081 | 0.053302 | 0.11845  |
| ITGB4    | 3.154614 | 5.794716 | 1.11E-08 | 2.81E-07 | 1.09E-08 | 2.84E-07 |
| ITGB5    | -1.07285 | -2.77602 | 0.005675 | 0.019846 | 0.005853 | 0.020377 |
| ITGB7    | -4.99143 | -7.72388 | 4.78E-14 | 6.07E-12 | 4.34E-14 | 5.67E-12 |
| ITGB8    | 0.845315 | 1.359065 | 0.174638 | 0.293352 | 0.174086 | 0.292436 |
| ITGBL1   | 0.86346  | 2.233806 | 0.025865 | 0.065817 | 0.026414 | 0.066745 |
| ITIH2    | -4.80516 | -5.89898 | 6.12E-09 | 1.72E-07 | 5.58E-09 | 1.60E-07 |
| ITIH4    | 1.126285 | 1.483108 | 0.138573 | 0.246235 | 0.137659 | 0.244935 |
| ITM2A    | -4.14394 | -8.35938 | 4.43E-16 | 7.71E-14 | 4.51E-16 | 8.16E-14 |
| ITM2C    | 0.286738 | 0.515632 | 0.606302 | 0.722887 | 0.606127 | 0.722678 |
| ITPK1    | -0.94918 | -1.62636 | 0.1044   | 0.19795  | 0.104103 | 0.1974   |
| ITPKA    | 1.089623 | 2.135497 | 0.033126 | 0.080711 | 0.033167 | 0.080728 |
| ITPR1    | -1.30904 | -1.46263 | 0.144093 | 0.253642 | 0.142928 | 0.252068 |
| ITPR2    | 0.270649 | 0.326354 | 0.744271 | 0.831291 | 0.743615 | 0.830756 |
| ITPR3    | 1.357375 | 2.713552 | 0.006848 | 0.023074 | 0.006871 | 0.023151 |
| ITSN2    | 1.596633 | 5.735998 | 1.54E-08 | 3.73E-07 | 2.19E-08 | 5.14E-07 |
| IVD      | 1.273973 | 1.433755 | 0.152165 | 0.264097 | 0.150983 | 0.262239 |
| IVNS1ABP | -1.55477 | -2.01387 | 0.044471 | 0.101614 | 0.043964 | 0.100747 |
| JAG2     | -2.60335 | -2.6672  | 0.007856 | 0.025892 | 0.007662 | 0.02536  |
| JAK1     | -0.85017 | -1.03928 | 0.299095 | 0.441055 | 0.297834 | 0.439918 |
| JAK2     | 0.057228 | 0.073262 | 0.941622 | 0.965661 | 0.94148  | 0.965515 |
| JAK3     | -0.61415 | -0.99989 | 0.317769 | 0.459902 | 0.317189 | 0.459411 |
| JAM3     | -0.06637 | -0.11297 | 0.910093 | 0.945507 | 0.910013 | 0.945461 |
| JMJD1C   | 1.480781 | 2.316794 | 0.020852 | 0.055684 | 0.020666 | 0.055357 |
| JPH3     | 0.538669 | 2.059613 | 0.039868 | 0.093464 | 0.042526 | 0.09812  |
| JTB      | -0.18257 | -0.22436 | 0.822552 | 0.884262 | 0.8221   | 0.883776 |
| JUN      | 2.626332 | 5.895734 | 6.24E-09 | 1.75E-07 | 6.58E-09 | 1.84E-07 |
| JUNB     | 1.342008 | 3.088123 | 0.002108 | 0.008829 | 0.002151 | 0.009001 |
| JUP      | 0.609197 | 0.710398 | 0.477734 | 0.611812 | 0.476513 | 0.610748 |
| KAL1     | 1.972137 | 4.124007 | 4.25E-05 | 0.000341 | 4.31E-05 | 0.000345 |
| KARS     | -0.46288 | -0.62957 | 0.529214 | 0.657669 | 0.528318 | 0.656729 |
| KATNA1   | -2.73519 | -3.22499 | 0.001328 | 0.006015 | 0.001288 | 0.00585  |
| KATNB1   | -2.82758 | -3.23937 | 0.001264 | 0.005753 | 0.001224 | 0.005604 |
| KCMF1    | 2.619226 | 5.959379 | 4.33E-09 | 1.31E-07 | 4.59E-09 | 1.36E-07 |
| KCNA3    | 2.582252 | 2.502054 | 0.012613 | 0.037262 | 0.012324 | 0.03658  |
| KCNA5    | -0.92951 | -1.33643 | 0.181919 | 0.302233 | 0.181084 | 0.301379 |
| KCNAB1   | 2.673365 | 5.529923 | 4.79E-08 | 1.02E-06 | 4.89E-08 | 1.05E-06 |
| KCNAB2   | 1.357708 | 2.050058 | 0.040794 | 0.095059 | 0.040461 | 0.094564 |
| KCNB1    | 1.5505   | 2.208393 | 0.027595 | 0.069279 | 0.027292 | 0.068557 |
| KCND1    | 2.49154  | 6.31658  | 5.22E-10 | 1.93E-08 | 5.91E-10 | 2.15E-08 |

|          |          |          |          |          |          |          |
|----------|----------|----------|----------|----------|----------|----------|
| KCNE3    | -2.34088 | -2.30521 | 0.021496 | 0.05701  | 0.021075 | 0.056247 |
| KCNF1    | -0.57079 | -0.75825 | 0.448599 | 0.584049 | 0.447565 | 0.583188 |
| KCNG1    | -0.16249 | -0.26533 | 0.790843 | 0.862604 | 0.790602 | 0.862442 |
| KCNH2    | -1.89915 | -3.07699 | 0.002187 | 0.009095 | 0.002159 | 0.009027 |
| KCNJ10   | 3.573947 | 8.531007 | 1.19E-16 | 2.55E-14 | 1.38E-16 | 3.25E-14 |
| KCNJ15   | 3.427353 | 7.014828 | 6.25E-12 | 5.16E-10 | 6.40E-12 | 5.37E-10 |
| KCNJ3    | 1.379733 | 1.419925 | 0.156151 | 0.268929 | 0.154852 | 0.267524 |
| KCNJ8    | 3.738791 | 5.104667 | 4.46E-07 | 7.18E-06 | 4.21E-07 | 6.86E-06 |
| KCNK1    | 1.206196 | 1.828066 | 0.068038 | 0.14206  | 0.067588 | 0.14131  |
| KCNK3    | 2.311007 | 3.914849 | 0.000101 | 0.000691 | 9.93E-05 | 0.000687 |
| KCNK5    | -0.04579 | -0.07895 | 0.937097 | 0.963541 | 0.937047 | 0.963492 |
| KCNK6    | -0.59103 | -0.90201 | 0.367414 | 0.506554 | 0.366652 | 0.505652 |
| KCNMA1   | -0.36656 | -1.11093 | 0.267043 | 0.405788 | 0.270246 | 0.408936 |
| KCNMB1   | 2.810408 | 5.500911 | 5.61E-08 | 1.18E-06 | 5.63E-08 | 1.19E-06 |
| KCNMB2   | 1.642896 | 3.079101 | 0.002171 | 0.009056 | 0.002167 | 0.009055 |
| KCNMB3   | 1.992259 | 3.539944 | 0.000431 | 0.002363 | 0.000428 | 0.002347 |
| KCNMB4   | 0.967664 | 1.494993 | 0.135444 | 0.242321 | 0.134849 | 0.241628 |
| KCNN3    | 0.194724 | 0.393851 | 0.693831 | 0.79427  | 0.693993 | 0.794298 |
| KCNN4    | 1.852134 | 3.370267 | 0.000799 | 0.003942 | 0.000795 | 0.003938 |
| KCNS1    | -1.5298  | -1.45584 | 0.145963 | 0.255979 | 0.144623 | 0.254295 |
| KCNS3    | 0.084935 | 0.11044  | 0.912097 | 0.946744 | 0.91189  | 0.946568 |
| KCTD15   | -0.28806 | -0.52449 | 0.600131 | 0.717714 | 0.59999  | 0.717545 |
| KCTD5    | 2.65691  | 3.760873 | 0.000186 | 0.001173 | 0.00018  | 0.001142 |
| KDELR1   | -0.75434 | -2.45872 | 0.014226 | 0.041019 | 0.015053 | 0.042878 |
| KDELR2   | 3.138145 | 5.737673 | 1.53E-08 | 3.73E-07 | 1.50E-08 | 3.66E-07 |
| KDR      | -0.62617 | -0.89492 | 0.371188 | 0.510262 | 0.370261 | 0.509285 |
| KEAP1    | 0.503573 | 0.780939 | 0.435148 | 0.571106 | 0.43446  | 0.570176 |
| KEL      | 0.334107 | 0.380564 | 0.703662 | 0.800262 | 0.702857 | 0.799799 |
| KHDRBS1  | -2.75471 | -9.16047 | 8.16E-19 | 3.84E-16 | 1.55E-18 | 6.06E-16 |
| KHDRBS3  | 1.913734 | 3.286951 | 0.001072 | 0.005021 | 0.001061 | 0.004979 |
| KHK      | 0.551511 | 0.793301 | 0.427917 | 0.565105 | 0.427036 | 0.5641   |
| KIAA0182 | 1.15978  | 3.090273 | 0.002093 | 0.008782 | 0.002183 | 0.009105 |
| KIAA0196 | 1.012281 | 1.410916 | 0.158789 | 0.272277 | 0.157931 | 0.271248 |
| KIAA0319 | 0.624977 | 1.034372 | 0.30138  | 0.442652 | 0.300853 | 0.442431 |
| KIAA0368 | 0.630327 | 0.990479 | 0.322341 | 0.464214 | 0.321654 | 0.463734 |
| KIAA0528 | 2.857575 | 7.068139 | 4.39E-12 | 3.75E-10 | 5.02E-12 | 4.29E-10 |
| KIAA0556 | 0.589415 | 1.4316   | 0.152781 | 0.264913 | 0.153905 | 0.266207 |
| KIAA0664 | 0.148708 | 0.172987 | 0.86272  | 0.913925 | 0.862342 | 0.913541 |
| KIAA0753 | 0.933454 | 1.99675  | 0.046305 | 0.105239 | 0.046551 | 0.105645 |
| KIAA0776 | 0.501145 | 0.533225 | 0.594076 | 0.712467 | 0.592949 | 0.711842 |
| KIAA0907 | -1.02359 | -1.44574 | 0.148774 | 0.259553 | 0.147962 | 0.258713 |

|          |          |          |          |          |          |          |
|----------|----------|----------|----------|----------|----------|----------|
| KIAA0922 | -0.53233 | -0.92158 | 0.357119 | 0.497535 | 0.356745 | 0.496948 |
| KIAA1033 | 2.032882 | 5.440722 | 7.75E-08 | 1.56E-06 | 8.74E-08 | 1.75E-06 |
| KIAA1217 | -3.69625 | -4.08453 | 5.02E-05 | 0.000389 | 4.77E-05 | 0.000373 |
| KIAA1324 | 0.01004  | 0.009984 | 0.992037 | 0.9941   | 0.992011 | 0.994127 |
| KIAA1407 | 1.586079 | 1.98708  | 0.047369 | 0.107294 | 0.046813 | 0.106102 |
| KIAA1632 | 0.528576 | 1.228788 | 0.219635 | 0.348941 | 0.220621 | 0.350311 |
| KIAA1704 | 0.636778 | 1.518647 | 0.12938  | 0.23361  | 0.13033  | 0.235145 |
| KIAA1715 | -0.20411 | -0.23901 | 0.811181 | 0.876852 | 0.81067  | 0.876299 |
| KIF11    | -0.33287 | -0.68088 | 0.496208 | 0.628281 | 0.496495 | 0.628233 |
| KIF1C    | 1.443874 | 4.03514  | 6.17E-05 | 0.000462 | 6.70E-05 | 0.000498 |
| KIF21A   | 1.119226 | 2.474528 | 0.013618 | 0.039654 | 0.013758 | 0.040028 |
| KIF21B   | 1.656001 | 2.657133 | 0.008091 | 0.026409 | 0.008009 | 0.026194 |
| KIF23    | -0.14049 | -0.28039 | 0.779275 | 0.854914 | 0.779366 | 0.854996 |
| KIF2C    | -0.47526 | -1.1217  | 0.26244  | 0.400998 | 0.263558 | 0.401791 |
| KIF3C    | 0.354886 | 0.578951 | 0.56284  | 0.686092 | 0.562378 | 0.685827 |
| KIF5B    | 0.176367 | 0.358772 | 0.719892 | 0.812754 | 0.720056 | 0.812939 |
| KIF5C    | 0.976669 | 2.239933 | 0.025462 | 0.065012 | 0.025749 | 0.065558 |
| KIFAP3   | 0.682053 | 1.097535 | 0.272849 | 0.411811 | 0.272238 | 0.411025 |
| KIFC1    | -4.33964 | -4.20959 | 2.95E-05 | 0.00025  | 2.78E-05 | 0.000237 |
| KIN      | -0.47495 | -0.53705 | 0.591433 | 0.71032  | 0.590367 | 0.709105 |
| KIT      | 0.146233 | 0.232687 | 0.816084 | 0.880828 | 0.815841 | 0.880472 |
| KLC2     | 2.288291 | 3.362625 | 0.000821 | 0.004038 | 0.000804 | 0.003975 |
| KLF10    | -1.13637 | -1.82538 | 0.068443 | 0.142526 | 0.068087 | 0.141973 |
| KLF11    | 1.076352 | 1.946348 | 0.052081 | 0.116507 | 0.051974 | 0.116378 |
| KLF12    | -3.06153 | -4.56342 | 6.11E-06 | 6.68E-05 | 5.88E-06 | 6.48E-05 |
| KLF3     | 2.685587 | 4.252383 | 2.45E-05 | 0.000213 | 2.39E-05 | 0.00021  |
| KLF4     | 2.426443 | 4.499506 | 8.19E-06 | 8.44E-05 | 8.13E-06 | 8.42E-05 |
| KLF5     | 0.899741 | 1.494803 | 0.135493 | 0.242321 | 0.135076 | 0.241758 |
| KLF6     | 1.242374 | 3.077035 | 0.002186 | 0.009095 | 0.002254 | 0.009374 |
| KLF7     | 0.955487 | 2.937439 | 0.003437 | 0.013229 | 0.003667 | 0.013944 |
| KLF8     | 3.534208 | 4.542994 | 6.71E-06 | 7.25E-05 | 6.37E-06 | 6.95E-05 |
| KLHDC3   | -2.00674 | -4.99167 | 7.86E-07 | 1.21E-05 | 8.47E-07 | 1.29E-05 |
| KLHDC4   | 1.012843 | 2.011777 | 0.044691 | 0.102065 | 0.044769 | 0.102192 |
| KLHL3    | 2.355404 | 2.657945 | 0.008072 | 0.026365 | 0.007891 | 0.0259   |
| KLHL5    | 0.944719 | 1.59599  | 0.111019 | 0.207224 | 0.110678 | 0.206834 |
| KLHL7    | -1.42064 | -3.86131 | 0.000125 | 0.000829 | 0.000134 | 0.000881 |
| KLHL8    | -1.27147 | -4.48467 | 8.76E-06 | 8.93E-05 | 1.08E-05 | 0.000108 |
| KLHL9    | 1.682008 | 3.18593  | 0.001518 | 0.006718 | 0.001517 | 0.006693 |
| KLK11    | 4.65156  | 5.474636 | 6.46E-08 | 1.33E-06 | 5.94E-08 | 1.23E-06 |
| KLK6     | 2.152046 | 2.565613 | 0.010542 | 0.032384 | 0.010334 | 0.031985 |
| KLK7     | -5.27035 | -4.53364 | 7.01E-06 | 7.52E-05 | 6.50E-06 | 7.07E-05 |



|         |          |          |          |          |          |          |
|---------|----------|----------|----------|----------|----------|----------|
| KLKB1   | 1.105844 | 2.785286 | 0.005518 | 0.01935  | 0.005671 | 0.019863 |
| KLRB1   | 1.356659 | 1.541093 | 0.123823 | 0.226036 | 0.122751 | 0.224296 |
| KLRC3   | -1.72519 | -1.79962 | 0.072425 | 0.149137 | 0.071541 | 0.147799 |
| KLRG1   | 0.515877 | 1.303663 | 0.19285  | 0.314612 | 0.194331 | 0.31678  |
| KNDC1   | 1.414089 | 1.81291  | 0.070347 | 0.145831 | 0.069666 | 0.144498 |
| KPNA4   | 0.269027 | 0.420597 | 0.674201 | 0.778581 | 0.673756 | 0.778053 |
| KPNA6   | -2.60106 | -3.49884 | 0.000502 | 0.002675 | 0.000488 | 0.002616 |
| KPNB1   | -0.54703 | -1.8462  | 0.065357 | 0.137995 | 0.067888 | 0.14181  |
| KPTN    | 0.455918 | 0.495738 | 0.620262 | 0.73413  | 0.619215 | 0.733304 |
| KRAS    | -0.25459 | -0.32381 | 0.746198 | 0.832206 | 0.745595 | 0.831941 |
| KRT10   | 3.301812 | 4.97408  | 8.58E-07 | 1.30E-05 | 8.22E-07 | 1.27E-05 |
| KRT13   | 1.456955 | 1.800145 | 0.072342 | 0.14906  | 0.07161  | 0.147876 |
| KRT14   | 2.03411  | 2.245393 | 0.025107 | 0.06435  | 0.024681 | 0.063422 |
| KRT15   | 3.10909  | 3.17609  | 0.00157  | 0.006895 | 0.001516 | 0.006693 |
| KRT16   | 3.723929 | 3.995866 | 7.25E-05 | 0.000531 | 6.89E-05 | 0.000509 |
| KRT19   | 3.224876 | 3.92537  | 9.67E-05 | 0.000667 | 9.26E-05 | 0.000646 |
| KRT20   | 0.583297 | 0.602948 | 0.546772 | 0.672056 | 0.545517 | 0.671185 |
| KRT7    | 0.600988 | 0.672706 | 0.501394 | 0.631275 | 0.500151 | 0.630471 |
| KRT8    | 0.871214 | 1.845079 | 0.06552  | 0.138222 | 0.065795 | 0.138609 |
| KRTCAP2 | -0.73857 | -2.31337 | 0.021041 | 0.056061 | 0.022007 | 0.058011 |
| KTN1    | 1.658143 | 3.033173 | 0.002525 | 0.010292 | 0.002515 | 0.010289 |
| KYNU    | 0.69995  | 1.138629 | 0.255314 | 0.392791 | 0.254741 | 0.392167 |
| LICAM   | 1.458536 | 3.754533 | 0.000191 | 0.001195 | 0.000201 | 0.001259 |
| LACTB   | 0.411566 | 0.741633 | 0.458601 | 0.594764 | 0.458389 | 0.594653 |
| LACTB2  | 0.882056 | 1.530783 | 0.126352 | 0.229199 | 0.126063 | 0.228674 |
| LAD1    | 2.14754  | 3.898227 | 0.000108 | 0.000732 | 0.000107 | 0.000727 |
| LAIR1   | -1.07913 | -3.55318 | 0.000411 | 0.002273 | 0.00046  | 0.002493 |
| LAIR2   | 1.06746  | 1.648476 | 0.09978  | 0.190751 | 0.099263 | 0.189959 |
| LAMA2   | 1.597159 | 2.911717 | 0.003728 | 0.014132 | 0.003715 | 0.014068 |
| LAMA3   | 4.996295 | 6.38435  | 3.46E-10 | 1.34E-08 | 3.12E-10 | 1.28E-08 |
| LAMA5   | 1.163924 | 3.158007 | 0.001669 | 0.007275 | 0.00175  | 0.007538 |
| LAMB1   | 0.685202 | 1.563654 | 0.118428 | 0.218536 | 0.119127 | 0.219375 |
| LAMC1   | -0.36161 | -0.6435  | 0.520145 | 0.649146 | 0.519908 | 0.648703 |
| LAMC3   | 1.454919 | 2.11992  | 0.034424 | 0.083056 | 0.034092 | 0.082424 |
| LAMP1   | 1.054833 | 1.275432 | 0.202652 | 0.327645 | 0.201457 | 0.325937 |
| LAMP2   | 3.102505 | 6.562742 | 1.15E-10 | 5.71E-09 | 1.19E-10 | 6.13E-09 |
| LANCL1  | 2.468605 | 3.796921 | 0.000161 | 0.001028 | 0.000158 | 0.00101  |
| LANCL2  | 2.107602 | 2.564386 | 0.010579 | 0.032476 | 0.010376 | 0.032062 |
| LAPTM5  | 1.842465 | 1.822009 | 0.068953 | 0.143334 | 0.068056 | 0.141973 |
| LARGE   | 0.090184 | 0.215363 | 0.829558 | 0.889961 | 0.829978 | 0.890209 |
| LARS2   | -1.5234  | -3.29605 | 0.001039 | 0.004896 | 0.001053 | 0.004953 |

|          |          |          |          |          |          |          |
|----------|----------|----------|----------|----------|----------|----------|
| LASP1    | -1.10261 | -2.55953 | 0.010726 | 0.032789 | 0.010891 | 0.033154 |
| LASS6    | 1.884572 | 2.799443 | 0.005284 | 0.018701 | 0.005205 | 0.018421 |
| LATS2    | -1.4516  | -2.01959 | 0.043871 | 0.100865 | 0.043435 | 0.100021 |
| LBR      | 0.619685 | 1.168664 | 0.243005 | 0.377377 | 0.242958 | 0.377295 |
| LCAT     | -0.43731 | -1.67492 | 0.094472 | 0.182557 | 0.098872 | 0.189441 |
| LCK      | -2.14588 | -2.93769 | 0.003434 | 0.013229 | 0.003365 | 0.013006 |
| LCN2     | -0.25643 | -0.26387 | 0.791968 | 0.86323  | 0.791329 | 0.862734 |
| LCP1     | -0.63199 | -1.07739 | 0.281743 | 0.421985 | 0.281315 | 0.421211 |
| LCP2     | 2.138554 | 5.720711 | 1.68E-08 | 4.02E-07 | 1.91E-08 | 4.54E-07 |
| LDB2     | -0.35478 | -0.47793 | 0.632872 | 0.744182 | 0.632118 | 0.74401  |
| LDB3     | 0.718899 | 1.890123 | 0.059225 | 0.128275 | 0.060232 | 0.130096 |
| LDHA     | -0.57177 | -0.98773 | 0.323686 | 0.464946 | 0.323302 | 0.464401 |
| LDHB     | -2.37677 | -2.96094 | 0.003189 | 0.012396 | 0.003112 | 0.012158 |
| LDLR     | -0.05167 | -0.11716 | 0.906774 | 0.94372  | 0.906944 | 0.943896 |
| LEFTY2   | -0.67505 | -1.0593  | 0.289891 | 0.432262 | 0.289202 | 0.431645 |
| LEMD3    | -1.84626 | -2.91416 | 0.0037   | 0.014035 | 0.003652 | 0.013897 |
| LEPR     | 1.670022 | 4.021949 | 6.51E-05 | 0.000481 | 6.79E-05 | 0.000503 |
| LEPRE1   | 1.857095 | 2.436504 | 0.015121 | 0.043024 | 0.014885 | 0.042528 |
| LEPREL1  | -0.68996 | -1.05229 | 0.29309  | 0.435512 | 0.292321 | 0.434651 |
| LEPROTL1 | -4.97607 | -5.70228 | 1.86E-08 | 4.41E-07 | 1.69E-08 | 4.08E-07 |
| LETM1    | 1.12437  | 2.238125 | 0.02558  | 0.065199 | 0.025636 | 0.065355 |
| LFNG     | 2.706092 | 4.343437 | 1.65E-05 | 0.000152 | 1.61E-05 | 0.000149 |
| LGALS2   | 1.446494 | 1.852792 | 0.064405 | 0.136537 | 0.063757 | 0.135531 |
| LGALS3   | -1.27319 | -3.15545 | 0.001683 | 0.007311 | 0.001737 | 0.007506 |
| LGALS3BP | 1.046646 | 1.824709 | 0.068544 | 0.14261  | 0.068341 | 0.14234  |
| LGALS4   | -1.6031  | -1.79132 | 0.073747 | 0.151454 | 0.07291  | 0.149968 |
| LGALS9   | 1.768308 | 3.577797 | 0.000375 | 0.002108 | 0.000377 | 0.002136 |
| LGI4     | 2.229992 | 5.081562 | 5.01E-07 | 8.01E-06 | 5.25E-07 | 8.39E-06 |
| LGMN     | -3.24689 | -6.80665 | 2.43E-11 | 1.56E-09 | 2.52E-11 | 1.64E-09 |
| LGR5     | -3.83581 | -3.55826 | 0.000403 | 0.002236 | 0.000385 | 0.002167 |
| LHFP     | 0.720328 | 1.225466 | 0.220882 | 0.350372 | 0.220465 | 0.350181 |
| LHFPL2   | 2.129753 | 2.596201 | 0.009658 | 0.030261 | 0.009469 | 0.029787 |
| LIAS     | -0.761   | -2.24983 | 0.024822 | 0.063717 | 0.025717 | 0.065513 |
| LIFR     | -1.78909 | -3.38672 | 0.000754 | 0.003749 | 0.000753 | 0.003764 |
| LIG1     | 1.025968 | 1.29379  | 0.196237 | 0.318589 | 0.195123 | 0.317658 |
| LIG3     | 0.8385   | 1.447588 | 0.148256 | 0.259006 | 0.147932 | 0.258713 |
| LIG4     | 1.898544 | 4.251979 | 2.46E-05 | 0.000213 | 2.53E-05 | 0.00022  |
| LILRB2   | 0.817999 | 0.880983 | 0.378681 | 0.517685 | 0.377242 | 0.516179 |
| LILRB3   | 1.095275 | 2.762493 | 0.005913 | 0.020539 | 0.006076 | 0.020976 |
| LILRB4   | 5.040443 | 6.068979 | 2.29E-09 | 7.41E-08 | 2.07E-09 | 6.85E-08 |
| LIMD1    | -1.69317 | -3.19514 | 0.001471 | 0.00656  | 0.001469 | 0.00654  |

|           |          |          |          |          |          |          |
|-----------|----------|----------|----------|----------|----------|----------|
| LIMK1     | 1.149237 | 1.425615 | 0.154501 | 0.266969 | 0.153449 | 0.265639 |
| LIMK2     | 2.264051 | 3.933914 | 9.34E-05 | 0.000651 | 9.22E-05 | 0.000644 |
| LIMS1     | 0.02236  | 0.055185 | 0.95601  | 0.974148 | 0.956141 | 0.974173 |
| LIMS3     | 0.353065 | 0.456083 | 0.648496 | 0.75773  | 0.64771  | 0.757073 |
| LIN7A     | -0.92882 | -1.61119 | 0.107666 | 0.202655 | 0.107396 | 0.202147 |
| LIPA      | 0.326398 | 0.533644 | 0.593786 | 0.712301 | 0.593354 | 0.711965 |
| LIPC      | -0.61996 | -0.99602 | 0.319644 | 0.461581 | 0.319023 | 0.46093  |
| LIPG      | 5.218865 | 5.028126 | 6.56E-07 | 1.02E-05 | 6.02E-07 | 9.40E-06 |
| LITAF     | -1.45789 | -2.14732 | 0.032169 | 0.078738 | 0.031861 | 0.078034 |
| LMAN1     | 1.254794 | 3.22631  | 0.001322 | 0.006    | 0.001376 | 0.006199 |
| LMCD1     | 2.169047 | 5.080534 | 5.04E-07 | 8.03E-06 | 5.32E-07 | 8.45E-06 |
| LMLN      | 0.347833 | 0.559741 | 0.575865 | 0.696417 | 0.57538  | 0.695905 |
| LMNA      | 1.022573 | 2.061289 | 0.039707 | 0.093265 | 0.039807 | 0.093547 |
| LMNB2     | 1.844624 | 2.463961 | 0.014021 | 0.040579 | 0.013806 | 0.040128 |
| LMO7      | -0.18996 | -0.32389 | 0.746132 | 0.832206 | 0.745915 | 0.831941 |
| LMOD1     | 0.675632 | 1.731155 | 0.08394  | 0.167028 | 0.085037 | 0.168568 |
| LNPEP     | -1.2462  | -1.58643 | 0.113171 | 0.210655 | 0.112287 | 0.209425 |
| LOC283174 | -2.14018 | -1.89193 | 0.058983 | 0.127944 | 0.058105 | 0.126666 |
| LOC285033 | 0.196608 | 0.283969 | 0.776532 | 0.852535 | 0.776122 | 0.852085 |
| LOXL2     | 0.850775 | 0.834492 | 0.404337 | 0.541883 | 0.402805 | 0.540138 |
| LPHN3     | 1.538183 | 3.353869 | 0.000847 | 0.004147 | 0.000861 | 0.004201 |
| LPIN2     | -1.70902 | -4.94253 | 1.00E-06 | 1.47E-05 | 1.15E-06 | 1.67E-05 |
| LPL       | -1.39661 | -2.49925 | 0.012713 | 0.037478 | 0.012664 | 0.037411 |
| LPP       | 0.277998 | 0.876533 | 0.381092 | 0.519772 | 0.384708 | 0.523944 |
| LPPR2     | -4.21562 | -4.94605 | 9.85E-07 | 1.45E-05 | 9.19E-07 | 1.38E-05 |
| LPXN      | 0.489455 | 0.678894 | 0.497468 | 0.628859 | 0.496571 | 0.628233 |
| LRBA      | -2.0834  | -2.04799 | 0.040997 | 0.095436 | 0.040342 | 0.094332 |
| LRCH3     | 2.233766 | 2.845069 | 0.004592 | 0.01668  | 0.004493 | 0.016369 |
| LRCH4     | 1.868362 | 5.117099 | 4.19E-07 | 6.79E-06 | 4.71E-07 | 7.56E-06 |
| LRFN3     | 0.097701 | 0.235349 | 0.814019 | 0.879312 | 0.814498 | 0.879426 |
| LRMP      | -3.13958 | -3.32664 | 0.000933 | 0.00447  | 0.0009   | 0.004345 |
| LRP11     | 2.734434 | 4.3876   | 1.35E-05 | 0.000129 | 1.32E-05 | 0.000127 |
| LRP3      | 2.450764 | 6.460124 | 2.17E-10 | 9.35E-09 | 2.53E-10 | 1.07E-08 |
| LRP4      | 2.440471 | 2.700036 | 0.007129 | 0.023917 | 0.006962 | 0.023404 |
| LRP5      | 0.425219 | 0.915465 | 0.360317 | 0.5002   | 0.360899 | 0.500683 |
| LRPAP1    | 0.718113 | 1.577129 | 0.115295 | 0.213677 | 0.115816 | 0.214643 |
| LRPPRC    | -1.2119  | -1.34437 | 0.179337 | 0.299084 | 0.178064 | 0.297617 |
| LRRC17    | 0.178689 | 0.308079 | 0.758129 | 0.838797 | 0.757941 | 0.838588 |
| LRRFIP1   | -1.64631 | -3.77929 | 0.000173 | 0.001098 | 0.000178 | 0.001128 |
| LRRFIP2   | 0.129738 | 0.222338 | 0.824126 | 0.885347 | 0.82398  | 0.88519  |
| LRRK2     | -1.53778 | -2.98127 | 0.002987 | 0.011749 | 0.002991 | 0.011812 |

|         |          |          |          |          |          |          |
|---------|----------|----------|----------|----------|----------|----------|
| LRSAM1  | -1.4329  | -2.0866  | 0.037347 | 0.088698 | 0.036996 | 0.087953 |
| LSAMP   | -0.76588 | -1.01914 | 0.308548 | 0.450505 | 0.307449 | 0.44918  |
| LSM1    | 0.656926 | 0.938865 | 0.348179 | 0.488636 | 0.347244 | 0.487712 |
| LSM10   | 0.806458 | 2.063224 | 0.039522 | 0.092971 | 0.040217 | 0.094179 |
| LSM11   | -0.0701  | -0.25722 | 0.797094 | 0.867009 | 0.799425 | 0.868739 |
| LSM3    | 0.484847 | 0.962973 | 0.33595  | 0.477462 | 0.336131 | 0.477286 |
| LSM4    | -1.21288 | -3.11202 | 0.001947 | 0.008236 | 0.002019 | 0.008512 |
| LSM5    | 0.434534 | 1.406827 | 0.159998 | 0.27365  | 0.163452 | 0.278241 |
| LSM6    | -2.36845 | -4.29597 | 2.03E-05 | 0.000183 | 2.01E-05 | 0.000181 |
| LSM7    | 0.970923 | 1.679937 | 0.093492 | 0.181433 | 0.093234 | 0.181    |
| LSS     | 0.357042 | 0.48512  | 0.627769 | 0.740777 | 0.627019 | 0.740124 |
| LST1    | 0.094708 | 0.275195 | 0.783261 | 0.857319 | 0.784486 | 0.858019 |
| LTA4H   | 2.43594  | 3.975368 | 7.89E-05 | 0.000565 | 7.73E-05 | 0.000556 |
| LTB     | -0.26204 | -0.5002  | 0.617121 | 0.732257 | 0.617125 | 0.732446 |
| LTBP1   | -1.41728 | -2.33225 | 0.020019 | 0.053795 | 0.019877 | 0.053569 |
| LTBR    | 0.17256  | 0.237971 | 0.811985 | 0.877519 | 0.811595 | 0.877098 |
| LTF     | 4.186523 | 3.93975  | 9.12E-05 | 0.00064  | 8.63E-05 | 0.000611 |
| LUM     | -0.66343 | -1.23592 | 0.216973 | 0.345569 | 0.21688  | 0.34542  |
| LUZP1   | 2.737381 | 5.297292 | 1.65E-07 | 3.00E-06 | 1.66E-07 | 3.00E-06 |
| LY6E    | 1.134649 | 1.944661 | 0.052284 | 0.116787 | 0.052082 | 0.11651  |
| LY6G5C  | 1.027057 | 1.914874 | 0.055985 | 0.123489 | 0.055935 | 0.123425 |
| LY75    | 1.659824 | 3.111549 | 0.00195  | 0.008241 | 0.001946 | 0.008248 |
| LY9     | 2.239283 | 3.034683 | 0.002512 | 0.010251 | 0.002458 | 0.010088 |
| LY96    | -1.40674 | -3.84155 | 0.000135 | 0.000883 | 0.000145 | 0.000939 |
| LYN     | 3.064435 | 3.852266 | 0.00013  | 0.000851 | 0.000125 | 0.000826 |
| LYNX1   | -1.56072 | -2.41109 | 0.016205 | 0.045526 | 0.016043 | 0.045096 |
| LYPLA2  | -0.13272 | -0.18518 | 0.85315  | 0.906785 | 0.852851 | 0.906468 |
| LYPLAL1 | 0.421033 | 0.591221 | 0.554596 | 0.679687 | 0.553793 | 0.678704 |
| LYZ     | 1.959047 | 2.312977 | 0.021062 | 0.056087 | 0.020712 | 0.055406 |
| M6PR    | 0.391642 | 0.496064 | 0.620031 | 0.734119 | 0.619165 | 0.733304 |
| MAD1L1  | 0.994856 | 1.082368 | 0.279525 | 0.419466 | 0.278089 | 0.418028 |
| MAD2L1  | -0.15527 | -0.35711 | 0.721137 | 0.813963 | 0.721673 | 0.814278 |
| MADCAM1 | 0.709408 | 0.946778 | 0.344134 | 0.486299 | 0.343045 | 0.485635 |
| MADD    | -0.22243 | -0.37247 | 0.709677 | 0.805222 | 0.709397 | 0.804872 |
| MAF     | -0.64932 | -0.58508 | 0.558714 | 0.682776 | 0.557359 | 0.681652 |
| MAFB    | 0.749061 | 0.923566 | 0.356085 | 0.49647  | 0.354845 | 0.494888 |
| MAG     | 0.993907 | 0.864101 | 0.387879 | 0.527192 | 0.386212 | 0.525687 |
| MAGEA10 | -1.90312 | -1.89188 | 0.058991 | 0.127944 | 0.058176 | 0.126762 |
| MAGED2  | 0.964817 | 1.893163 | 0.058819 | 0.12769  | 0.058882 | 0.127885 |
| MAGEF1  | -0.17485 | -0.22981 | 0.818315 | 0.882244 | 0.8179   | 0.882192 |
| MAG11   | 0.935961 | 2.232345 | 0.025962 | 0.065918 | 0.02633  | 0.066569 |

|          |          |          |          |          |          |          |
|----------|----------|----------|----------|----------|----------|----------|
| MAGOH    | 1.288689 | 2.114098 | 0.03492  | 0.083823 | 0.03471  | 0.083374 |
| MAL      | -4.44061 | -5.43857 | 7.84E-08 | 1.57E-06 | 7.24E-08 | 1.48E-06 |
| MALT1    | -0.50784 | -0.74016 | 0.459491 | 0.595664 | 0.458665 | 0.594819 |
| MAMDC2   | -3.42627 | -5.82673 | 9.24E-09 | 2.44E-07 | 8.93E-09 | 2.40E-07 |
| MAN1A1   | -0.64757 | -1.58126 | 0.114348 | 0.212174 | 0.115367 | 0.214234 |
| MAN1A2   | 1.313244 | 1.79101  | 0.073797 | 0.151454 | 0.073174 | 0.150379 |
| MAN1B1   | -2.97428 | -4.87316 | 1.41E-06 | 1.99E-05 | 1.37E-06 | 1.94E-05 |
| MAN2A2   | -0.96668 | -1.74089 | 0.082218 | 0.164564 | 0.082069 | 0.164211 |
| MAN2C1   | -1.56979 | -1.91032 | 0.05657  | 0.124533 | 0.055923 | 0.123425 |
| MANBA    | 4.809741 | 4.995342 | 7.72E-07 | 1.19E-05 | 7.13E-07 | 1.10E-05 |
| MAOA     | 3.591598 | 5.244367 | 2.18E-07 | 3.82E-06 | 2.07E-07 | 3.67E-06 |
| MAOB     | 2.039891 | 3.221111 | 0.001346 | 0.00609  | 0.001325 | 0.006    |
| MAP1A    | -0.53818 | -0.7279  | 0.466958 | 0.603106 | 0.465978 | 0.602171 |
| MAP2K1   | -2.86532 | -3.87898 | 0.000117 | 0.000781 | 0.000113 | 0.000753 |
| MAP2K3   | -0.47309 | -1.01754 | 0.309306 | 0.451191 | 0.309887 | 0.451929 |
| MAP2K4   | 1.083381 | 1.322983 | 0.186347 | 0.307308 | 0.185197 | 0.305892 |
| MAP2K5   | -0.58988 | -0.97444 | 0.330232 | 0.471559 | 0.329698 | 0.470568 |
| MAP3K11  | 0.51721  | 0.613315 | 0.539902 | 0.66637  | 0.5388   | 0.665313 |
| MAP3K14  | 2.661533 | 2.975531 | 0.003043 | 0.011928 | 0.002958 | 0.011704 |
| MAP3K4   | -0.33646 | -0.45597 | 0.648579 | 0.75773  | 0.647861 | 0.757073 |
| MAP3K6   | -0.89278 | -0.91123 | 0.362542 | 0.501751 | 0.361024 | 0.500683 |
| MAP3K7   | -0.49269 | -1.01832 | 0.308938 | 0.450818 | 0.309311 | 0.451479 |
| MAP4     | -0.36913 | -0.84417 | 0.398912 | 0.537216 | 0.399823 | 0.537981 |
| MAP4K1   | 0.186887 | 0.389889 | 0.696758 | 0.796391 | 0.697009 | 0.796291 |
| MAP4K2   | -0.29118 | -0.92594 | 0.354853 | 0.495193 | 0.358606 | 0.498801 |
| MAP4K3   | 2.068755 | 3.496506 | 0.000506 | 0.002692 | 0.0005   | 0.002664 |
| MAP4K4   | -2.59831 | -4.78269 | 2.18E-06 | 2.80E-05 | 2.16E-06 | 2.83E-05 |
| MAP4K5   | -0.30067 | -0.60872 | 0.542939 | 0.668889 | 0.543166 | 0.668818 |
| MAPK1    | -1.80671 | -2.1767  | 0.029894 | 0.073947 | 0.029459 | 0.073095 |
| MAPK10   | -0.41264 | -0.72042 | 0.47155  | 0.606371 | 0.471234 | 0.605798 |
| MAPK11   | -0.70697 | -1.03494 | 0.301113 | 0.442437 | 0.300235 | 0.442214 |
| MAPK14   | -0.28738 | -0.42666 | 0.669781 | 0.775554 | 0.66924  | 0.775118 |
| MAPK4    | -3.21762 | -4.8631  | 1.48E-06 | 2.05E-05 | 1.42E-06 | 1.99E-05 |
| MAPK6    | -2.60702 | -3.0243  | 0.002599 | 0.010521 | 0.002528 | 0.010309 |
| MAPK7    | 0.362778 | 0.662367 | 0.507991 | 0.636852 | 0.507836 | 0.63664  |
| MAPK8IP3 | -0.29267 | -0.50708 | 0.612287 | 0.728729 | 0.612014 | 0.728219 |
| MAPK9    | 1.36927  | 1.699655 | 0.089716 | 0.175921 | 0.088898 | 0.174601 |
| MAPKAP1  | -1.33384 | -2.04235 | 0.041555 | 0.096306 | 0.041234 | 0.095893 |
| MAPKAPK2 | 0.895685 | 2.175703 | 0.029968 | 0.074054 | 0.030417 | 0.07493  |
| MAPKAPK3 | 1.368247 | 3.387317 | 0.000752 | 0.003745 | 0.00078  | 0.003874 |
| MAPKAPK5 | -0.11216 | -0.23503 | 0.814263 | 0.879374 | 0.814431 | 0.879426 |

|          |          |          |          |          |          |          |
|----------|----------|----------|----------|----------|----------|----------|
| MAPRE1   | 0.017573 | 0.04985  | 0.960259 | 0.976418 | 0.96047  | 0.976389 |
| MAPRE2   | -0.97606 | -1.87542 | 0.061222 | 0.131691 | 0.061237 | 0.131663 |
| MAPRE3   | 0.456883 | 0.7236   | 0.469594 | 0.604683 | 0.468985 | 0.604122 |
| MAPT     | 2.283156 | 3.34971  | 0.00086  | 0.004184 | 0.000841 | 0.004119 |
| MARCKS   | 2.914201 | 5.948015 | 4.62E-09 | 1.37E-07 | 4.70E-09 | 1.38E-07 |
| MARCKSL1 | -0.81623 | -1.64108 | 0.101307 | 0.193004 | 0.101473 | 0.193477 |
| MARK3    | -2.79118 | -3.54581 | 0.000422 | 0.00232  | 0.000408 | 0.002276 |
| MARS     | 0.825101 | 1.863084 | 0.06294  | 0.134342 | 0.063405 | 0.135087 |
| MARVELD3 | 0.986602 | 1.460466 | 0.144687 | 0.254217 | 0.14398  | 0.253639 |
| MAT2B    | -1.15159 | -2.87599 | 0.004171 | 0.015352 | 0.004289 | 0.015738 |
| MATN2    | -0.70619 | -1.13688 | 0.256043 | 0.393593 | 0.255438 | 0.392596 |
| MAX      | 0.960599 | 1.309521 | 0.190861 | 0.312262 | 0.189901 | 0.311205 |
| MBD1     | 0.926687 | 1.041699 | 0.297972 | 0.439707 | 0.296576 | 0.438485 |
| MBD2     | 1.598816 | 3.925876 | 9.65E-05 | 0.000667 | 0.000101 | 0.000695 |
| MBD3     | 0.091769 | 0.131861 | 0.895139 | 0.935339 | 0.89494  | 0.93513  |
| MBD4     | 0.734165 | 0.889322 | 0.374188 | 0.513484 | 0.372926 | 0.511901 |
| MBIP     | 0.050116 | 0.080408 | 0.93594  | 0.962774 | 0.935857 | 0.962689 |
| MBNL1    | 0.274432 | 0.52021  | 0.60311  | 0.72054  | 0.603092 | 0.720191 |
| MBNL2    | 1.023238 | 1.934014 | 0.053583 | 0.118921 | 0.053562 | 0.118802 |
| MBNL3    | 1.278257 | 1.74504  | 0.081492 | 0.1634   | 0.080834 | 0.162433 |
| MBP      | 0.294045 | 0.330266 | 0.741315 | 0.82858  | 0.740593 | 0.827825 |
| MBTPS1   | -0.85166 | -2.23988 | 0.025465 | 0.065012 | 0.026049 | 0.066052 |
| MCART1   | -0.54212 | -0.72485 | 0.468828 | 0.604283 | 0.467827 | 0.603837 |
| MCFD2    | 0.15701  | 0.322921 | 0.746868 | 0.832206 | 0.747045 | 0.832411 |
| MCL1     | 0.426059 | 1.051531 | 0.29344  | 0.435618 | 0.294874 | 0.437078 |
| MCM3     | -2.7477  | -5.75499 | 1.38E-08 | 3.44E-07 | 1.42E-08 | 3.53E-07 |
| MCM6     | -0.14722 | -0.17486 | 0.86125  | 0.913329 | 0.860877 | 0.91314  |
| MCM7     | -3.18914 | -3.90586 | 0.000105 | 0.000712 | 0.0001   | 0.000692 |
| MCRS1    | -0.01425 | -0.03291 | 0.97376  | 0.98254  | 0.973814 | 0.982725 |
| MCTS1    | 0.363308 | 0.569458 | 0.569259 | 0.691527 | 0.568705 | 0.690854 |
| MDH1     | 0.748497 | 0.911992 | 0.362141 | 0.501343 | 0.360883 | 0.500683 |
| MDH2     | -1.7709  | -5.92613 | 5.24E-09 | 1.50E-07 | 7.10E-09 | 1.96E-07 |
| MDK      | -1.02559 | -1.66751 | 0.095937 | 0.184651 | 0.095535 | 0.184249 |
| MDM2     | -1.47808 | -3.10153 | 0.002016 | 0.008482 | 0.002035 | 0.008569 |
| MDM4     | 1.463416 | 2.620652 | 0.008999 | 0.028598 | 0.008962 | 0.028518 |
| ME2      | -0.11743 | -0.28666 | 0.774471 | 0.850669 | 0.775088 | 0.851177 |
| ME3      | 1.438405 | 1.890409 | 0.059187 | 0.128251 | 0.058597 | 0.127385 |
| MED12    | 4.588337 | 6.854323 | 1.79E-11 | 1.24E-09 | 1.64E-11 | 1.17E-09 |
| MED19    | -0.74126 | -0.84478 | 0.398574 | 0.536948 | 0.39723  | 0.535259 |
| MED28    | -0.96357 | -2.0739  | 0.038516 | 0.091152 | 0.038748 | 0.091516 |
| MED4     | -0.56453 | -0.69409 | 0.487893 | 0.619422 | 0.486767 | 0.618964 |

|        |          |          |          |          |          |          |
|--------|----------|----------|----------|----------|----------|----------|
| MED6   | -0.26316 | -0.63231 | 0.527428 | 0.656143 | 0.528497 | 0.656778 |
| MEF2A  | 2.451535 | 3.247538 | 0.001229 | 0.005637 | 0.001198 | 0.005513 |
| MEF2C  | -0.34597 | -0.5949  | 0.552139 | 0.677029 | 0.551811 | 0.676627 |
| MEF2D  | 0.443218 | 0.86545  | 0.387139 | 0.526643 | 0.387241 | 0.526173 |
| MEG3   | 1.37764  | 2.885949 | 0.004043 | 0.015008 | 0.004076 | 0.015072 |
| MEIS2  | 2.918883 | 4.395941 | 1.31E-05 | 0.000125 | 1.26E-05 | 0.000122 |
| MEN1   | -1.23429 | -1.37563 | 0.16945  | 0.286132 | 0.168207 | 0.284584 |
| MEOX1  | -0.64979 | -1.00573 | 0.314952 | 0.457016 | 0.314222 | 0.456238 |
| MERTK  | 0.669947 | 1.083712 | 0.278929 | 0.41884  | 0.278333 | 0.418078 |
| MESP1  | -1.38174 | -1.75597 | 0.079605 | 0.160784 | 0.078866 | 0.159565 |
| MEST   | -0.5201  | -0.86244 | 0.38879  | 0.527668 | 0.388279 | 0.527126 |
| MET    | 1.731316 | 3.41503  | 0.000681 | 0.003467 | 0.000683 | 0.003483 |
| METAP2 | -0.77843 | -2.72158 | 0.006686 | 0.022625 | 0.007265 | 0.024252 |
| MFAP1  | -1.54977 | -2.05023 | 0.040778 | 0.095059 | 0.040316 | 0.094318 |
| MFAP3  | -2.14051 | -2.73754 | 0.006374 | 0.021773 | 0.006246 | 0.021398 |
| MFAP4  | -2.04433 | -4.97405 | 8.58E-07 | 1.30E-05 | 9.17E-07 | 1.38E-05 |
| MFGE8  | 1.722893 | 5.053684 | 5.77E-07 | 9.05E-06 | 6.70E-07 | 1.04E-05 |
| MFHAS1 | 0.023687 | 0.035165 | 0.97196  | 0.982024 | 0.971911 | 0.982028 |
| MF12   | 1.707174 | 2.125858 | 0.033924 | 0.082103 | 0.033472 | 0.081297 |
| MFN2   | 0.005643 | 0.010948 | 0.991269 | 0.993791 | 0.99127  | 0.993791 |
| MFNG   | -1.22056 | -2.5579  | 0.010776 | 0.032909 | 0.010846 | 0.033048 |
| MGA    | -0.99786 | -1.46844 | 0.142512 | 0.251259 | 0.141797 | 0.25045  |
| MGAT1  | 0.151961 | 0.298603 | 0.765347 | 0.844793 | 0.76541  | 0.844671 |
| MGAT2  | -0.42176 | -1.14586 | 0.252313 | 0.389448 | 0.25446  | 0.391862 |
| MGAT3  | 0.986882 | 0.937424 | 0.348919 | 0.489041 | 0.347313 | 0.487712 |
| MGLL   | -0.99329 | -1.47368 | 0.141093 | 0.249488 | 0.140399 | 0.248447 |
| MGMT   | 0.993465 | 2.574137 | 0.010289 | 0.031781 | 0.010572 | 0.032468 |
| MGP    | -2.16109 | -3.32818 | 0.000928 | 0.004459 | 0.000911 | 0.004382 |
| MGST1  | 2.986401 | 3.513743 | 0.000475 | 0.002561 | 0.000458 | 0.002487 |
| MGST2  | 3.687704 | 5.694252 | 1.94E-08 | 4.59E-07 | 1.85E-08 | 4.40E-07 |
| MGST3  | 0.932622 | 2.371071 | 0.018053 | 0.049793 | 0.018446 | 0.050406 |
| MIB1   | 1.78687  | 2.957113 | 0.003228 | 0.012532 | 0.003194 | 0.012447 |
| MICA   | -2.88045 | -3.60569 | 0.000337 | 0.001943 | 0.000326 | 0.001883 |
| MID1   | 0.10289  | 0.177614 | 0.859086 | 0.911858 | 0.858975 | 0.911767 |
| MINPP1 | 1.663781 | 3.664316 | 0.00027  | 0.001623 | 0.000275 | 0.001649 |
| MIPEP  | 2.089025 | 2.634417 | 0.008646 | 0.027828 | 0.008481 | 0.027433 |
| MITF   | -1.80787 | -4.02712 | 6.37E-05 | 0.000473 | 6.54E-05 | 0.000488 |
| MKI67  | 0.504747 | 0.716485 | 0.473971 | 0.608652 | 0.473099 | 0.60803  |
| MKKS   | 0.039943 | 0.058732 | 0.953185 | 0.972638 | 0.953101 | 0.972552 |
| MKL2   | 2.145061 | 4.419863 | 1.17E-05 | 0.000115 | 1.19E-05 | 0.000117 |
| MKNK1  | -1.91313 | -3.76334 | 0.000184 | 0.001164 | 0.000185 | 0.001166 |

|          |          |          |          |          |          |          |
|----------|----------|----------|----------|----------|----------|----------|
| MKNK2    | 1.97598  | 3.439487 | 0.000623 | 0.003216 | 0.000617 | 0.003182 |
| MKRN1    | -0.41975 | -1.41271 | 0.158263 | 0.271572 | 0.162125 | 0.276885 |
| MLF1IP   | 0.534252 | 0.998941 | 0.318227 | 0.460057 | 0.318145 | 0.460131 |
| MLF2     | -0.63903 | -1.30967 | 0.19081  | 0.312262 | 0.191113 | 0.312536 |
| MLH1     | -1.16453 | -1.71429 | 0.086994 | 0.171651 | 0.086429 | 0.170751 |
| MLH3     | 0.601238 | 1.019714 | 0.308276 | 0.450248 | 0.307829 | 0.449595 |
| MLL      | 2.473072 | 4.114481 | 4.42E-05 | 0.000352 | 4.34E-05 | 0.000347 |
| MLL5     | -1.12744 | -1.67561 | 0.094337 | 0.182463 | 0.093765 | 0.181655 |
| MLLT10   | -1.2657  | -2.53543 | 0.011484 | 0.034556 | 0.01152  | 0.034687 |
| MLN      | 1.666904 | 2.731587 | 0.006489 | 0.022071 | 0.006427 | 0.021951 |
| MLPH     | 0.897671 | 1.491384 | 0.136388 | 0.243458 | 0.135969 | 0.242896 |
| MLYCD    | -1.41482 | -2.45059 | 0.014548 | 0.041768 | 0.01447  | 0.041647 |
| MMD      | -0.73242 | -1.38937 | 0.165238 | 0.280469 | 0.165217 | 0.280636 |
| MME      | 0.029861 | 0.034498 | 0.972491 | 0.982024 | 0.972414 | 0.982028 |
| MMP1     | 0.82572  | 0.807765 | 0.419547 | 0.557026 | 0.418029 | 0.555323 |
| MMP10    | 3.143211 | 3.990322 | 7.42E-05 | 0.00054  | 7.12E-05 | 0.000524 |
| MMP11    | 3.882732 | 4.115597 | 4.40E-05 | 0.000352 | 4.17E-05 | 0.000336 |
| MMP15    | 3.606936 | 3.969895 | 8.06E-05 | 0.000576 | 7.68E-05 | 0.000554 |
| MMP2     | -1.09782 | -1.44055 | 0.150236 | 0.261657 | 0.149286 | 0.260158 |
| MMP25    | 1.769611 | 2.566888 | 0.010504 | 0.032312 | 0.010359 | 0.032032 |
| MMP7     | 1.382481 | 1.092852 | 0.274899 | 0.41411  | 0.273137 | 0.411853 |
| MMP9     | 3.044348 | 3.053029 | 0.002366 | 0.009763 | 0.00229  | 0.009501 |
| MMRN2    | 3.126569 | 9.071378 | 1.68E-18 | 6.07E-16 | 2.51E-18 | 9.06E-16 |
| MN1      | -1.9502  | -2.8261  | 0.004869 | 0.01755  | 0.004789 | 0.017289 |
| MNAT1    | -0.16684 | -0.37539 | 0.7075   | 0.803395 | 0.707983 | 0.803749 |
| MNDA     | 3.373418 | 3.884653 | 0.000114 | 0.000768 | 0.000109 | 0.000736 |
| MNT      | 0.880472 | 3.602367 | 0.000342 | 0.001955 | 0.000421 | 0.002322 |
| MOAPI    | -0.63282 | -1.19102 | 0.234119 | 0.367767 | 0.234065 | 0.367928 |
| MOBKL2A  | -2.45668 | -7.29551 | 9.50E-13 | 9.70E-11 | 1.28E-12 | 1.31E-10 |
| MOCS1    | 0.607075 | 0.73462  | 0.462859 | 0.599199 | 0.461675 | 0.597917 |
| MOCS2    | -0.84171 | -1.0236  | 0.306437 | 0.448119 | 0.305166 | 0.446817 |
| MOCS3    | -2.45181 | -3.29576 | 0.00104  | 0.004896 | 0.001013 | 0.004799 |
| MOSPD3   | 0.522441 | 0.819229 | 0.412982 | 0.550643 | 0.412313 | 0.550063 |
| MPDU1    | -0.25808 | -0.46896 | 0.639269 | 0.749641 | 0.639133 | 0.749482 |
| MPDZ     | -1.64502 | -3.25412 | 0.001202 | 0.005548 | 0.001206 | 0.005545 |
| MPHOSPH6 | 1.282638 | 3.939265 | 9.14E-05 | 0.00064  | 0.000102 | 0.000701 |
| MPI      | -2.98938 | -5.86316 | 7.51E-09 | 2.04E-07 | 7.55E-09 | 2.07E-07 |
| MPP1     | -0.42753 | -0.92143 | 0.3572   | 0.497535 | 0.357788 | 0.498134 |
| MPP2     | 0.334002 | 0.447252 | 0.654855 | 0.763537 | 0.654131 | 0.762693 |
| MPP3     | 0.772171 | 1.030178 | 0.303343 | 0.444979 | 0.30225  | 0.44393  |
| MPP6     | -0.89168 | -0.94398 | 0.34556  | 0.487112 | 0.344082 | 0.486518 |



|         |          |          |          |          |          |          |
|---------|----------|----------|----------|----------|----------|----------|
| MPST    | 1.692553 | 3.433733 | 0.000637 | 0.00326  | 0.000641 | 0.003288 |
| MPV17   | -1.19138 | -1.54496 | 0.122886 | 0.224937 | 0.121996 | 0.223453 |
| MPZL1   | 0.109095 | 0.237102 | 0.812659 | 0.878045 | 0.812902 | 0.878307 |
| MR1     | 0.051093 | 0.076653 | 0.938925 | 0.963946 | 0.938822 | 0.964052 |
| MRAS    | 2.809541 | 2.934909 | 0.003465 | 0.013325 | 0.003365 | 0.013006 |
| MRE11A  | -0.08407 | -0.13997 | 0.888735 | 0.931338 | 0.888619 | 0.931217 |
| MRP63   | 0.14459  | 0.198354 | 0.842836 | 0.898057 | 0.842504 | 0.897704 |
| MRPL1   | 0.90859  | 1.596766 | 0.110846 | 0.206983 | 0.110607 | 0.206783 |
| MRPL14  | 1.147496 | 1.493059 | 0.135949 | 0.242858 | 0.135023 | 0.241756 |
| MRPL16  | 1.681121 | 4.112379 | 4.46E-05 | 0.000354 | 4.68E-05 | 0.000368 |
| MRPL19  | 0.800195 | 3.301853 | 0.001018 | 0.004812 | 0.001221 | 0.005597 |
| MRPL21  | 1.670229 | 3.708659 | 0.000228 | 0.001405 | 0.000233 | 0.001434 |
| MRPL22  | -0.64389 | -1.56258 | 0.118681 | 0.218832 | 0.119685 | 0.220165 |
| MRPL23  | -0.51311 | -0.52658 | 0.598683 | 0.716709 | 0.597532 | 0.715698 |
| MRPL28  | -1.50212 | -1.46394 | 0.143736 | 0.253114 | 0.142427 | 0.251373 |
| MRPL33  | -0.20205 | -0.57887 | 0.562892 | 0.686092 | 0.565046 | 0.688007 |
| MRPL39  | -1.86752 | -3.94226 | 9.03E-05 | 0.000635 | 9.16E-05 | 0.000642 |
| MRPL4   | -1.92697 | -2.47992 | 0.013416 | 0.039164 | 0.013192 | 0.038704 |
| MRPL40  | 1.830402 | 2.833987 | 0.004752 | 0.017208 | 0.004689 | 0.016965 |
| MRPL42  | -1.85109 | -2.44923 | 0.014602 | 0.041899 | 0.014376 | 0.041452 |
| MRPL43  | -0.08618 | -0.13551 | 0.892252 | 0.933634 | 0.8921   | 0.933409 |
| MRPL54  | 1.386602 | 2.260581 | 0.024144 | 0.062281 | 0.023974 | 0.061877 |
| MRPS10  | -0.36767 | -0.59615 | 0.5513   | 0.67653  | 0.550812 | 0.675755 |
| MRPS11  | 0.144501 | 0.228709 | 0.819173 | 0.882244 | 0.818929 | 0.882192 |
| MRPS12  | -1.30868 | -2.34402 | 0.019404 | 0.052484 | 0.019339 | 0.052327 |
| MRPS16  | 0.303973 | 0.938236 | 0.348502 | 0.488845 | 0.351924 | 0.491982 |
| MRPS18B | -0.12434 | -0.38471 | 0.700587 | 0.798826 | 0.702623 | 0.799799 |
| MRPS23  | 0.474801 | 0.857763 | 0.391367 | 0.530247 | 0.391153 | 0.529903 |
| MRPS30  | 4.653841 | 4.637068 | 4.34E-06 | 4.99E-05 | 4.04E-06 | 4.68E-05 |
| MRPS31  | 1.375847 | 2.372688 | 0.017974 | 0.049665 | 0.017881 | 0.049429 |
| MRPS35  | 0.110388 | 0.229365 | 0.818664 | 0.882244 | 0.818812 | 0.882192 |
| MRPS36  | -0.19415 | -0.43889 | 0.660901 | 0.76868  | 0.66147  | 0.769082 |
| MRPS5   | 0.320599 | 0.559779 | 0.57584  | 0.696417 | 0.575568 | 0.695953 |
| MRPS6   | 2.308717 | 7.413716 | 4.22E-13 | 4.51E-11 | 6.29E-13 | 6.57E-11 |
| MRRF    | 1.30238  | 2.586006 | 0.009945 | 0.030933 | 0.009971 | 0.031014 |
| MRV11   | -1.57008 | -2.75016 | 0.006137 | 0.021084 | 0.006101 | 0.021005 |
| MS4A1   | -0.49543 | -0.93308 | 0.351157 | 0.490946 | 0.351104 | 0.490982 |
| MS4A2   | 0.864037 | 1.645972 | 0.100295 | 0.191465 | 0.10029  | 0.191533 |
| MS4A4A  | 2.096377 | 4.161299 | 3.63E-05 | 0.000297 | 3.65E-05 | 0.000298 |
| MS4A6A  | -1.7377  | -2.38917 | 0.017196 | 0.04785  | 0.016959 | 0.047264 |
| MS4A8B  | 1.464714 | 1.5915   | 0.112026 | 0.208936 | 0.110954 | 0.207268 |

|        |          |          |          |          |          |          |
|--------|----------|----------|----------|----------|----------|----------|
| MSC    | 2.914345 | 2.902651 | 0.003837 | 0.014358 | 0.003724 | 0.014081 |
| MSH2   | 3.0807   | 4.19928  | 3.09E-05 | 0.000259 | 2.96E-05 | 0.000251 |
| MSH3   | 1.122881 | 3.577567 | 0.000375 | 0.002108 | 0.000416 | 0.002305 |
| MSI2   | 0.623364 | 0.838076 | 0.402323 | 0.5398   | 0.401275 | 0.538712 |
| MSLN   | 1.763194 | 1.827162 | 0.068174 | 0.142244 | 0.067315 | 0.140927 |
| MSMB   | -0.07409 | -0.06261 | 0.950095 | 0.970749 | 0.949917 | 0.970568 |
| MSRA   | 0.896842 | 0.878264 | 0.380153 | 0.518943 | 0.378598 | 0.517572 |
| MSRB2  | 0.382636 | 1.154864 | 0.248608 | 0.384613 | 0.251733 | 0.388554 |
| MST1R  | 4.082877 | 4.229623 | 2.71E-05 | 0.000232 | 2.55E-05 | 0.000222 |
| MSX1   | -2.29694 | -2.51948 | 0.012012 | 0.035869 | 0.01176  | 0.035296 |
| MT1E   | 0.885286 | 1.2523   | 0.21095  | 0.337693 | 0.210042 | 0.336408 |
| MT3    | 1.192669 | 1.982278 | 0.047905 | 0.1083   | 0.047667 | 0.107812 |
| MTA1   | -0.44159 | -0.54598 | 0.585281 | 0.704796 | 0.584318 | 0.703636 |
| MTAP   | 1.63006  | 3.188558 | 0.001505 | 0.006679 | 0.001508 | 0.006675 |
| MTCH2  | -0.5378  | -1.52612 | 0.12751  | 0.230942 | 0.129543 | 0.233994 |
| MTCP1  | -0.58595 | -1.6128  | 0.107315 | 0.202238 | 0.10899  | 0.204493 |
| MTERF  | 1.268075 | 2.947824 | 0.003325 | 0.012862 | 0.003392 | 0.013098 |
| MTF1   | -1.10793 | -1.40924 | 0.159283 | 0.272824 | 0.158258 | 0.271267 |
| MTHFD1 | -0.56756 | -1.45636 | 0.145817 | 0.255819 | 0.147254 | 0.257763 |
| MTHFD2 | -0.0693  | -0.09302 | 0.92592  | 0.955709 | 0.925755 | 0.955645 |
| MTHFR  | -0.06148 | -0.06368 | 0.949244 | 0.970512 | 0.949085 | 0.97035  |
| MTIF2  | 0.08568  | 0.182904 | 0.854935 | 0.908477 | 0.855096 | 0.908443 |
| MTL5   | 0.577412 | 0.926332 | 0.354647 | 0.495052 | 0.354025 | 0.494184 |
| MTM1   | -0.0487  | -0.07369 | 0.941283 | 0.965661 | 0.941187 | 0.965515 |
| MTMR2  | -0.69487 | -1.1267  | 0.260319 | 0.398438 | 0.259735 | 0.39764  |
| MTMR4  | -0.71323 | -1.51394 | 0.13057  | 0.235037 | 0.130974 | 0.235853 |
| MTO1   | 0.075958 | 0.140087 | 0.888639 | 0.931338 | 0.888607 | 0.931217 |
| MTR    | 1.425555 | 3.203457 | 0.00143  | 0.006407 | 0.001457 | 0.006505 |
| MTRF1  | 1.469593 | 3.299391 | 0.001027 | 0.004844 | 0.001046 | 0.00493  |
| MTX2   | 0.452564 | 0.629927 | 0.528983 | 0.657557 | 0.528131 | 0.656671 |
| MTX3   | -0.57764 | -0.62715 | 0.530803 | 0.658683 | 0.529572 | 0.657767 |
| MUC13  | -0.46633 | -0.48461 | 0.62813  | 0.741016 | 0.627058 | 0.740124 |
| MUC2   | -1.11393 | -1.09904 | 0.272195 | 0.411091 | 0.27064  | 0.409268 |
| MUC4   | -0.62015 | -0.61822 | 0.536665 | 0.66377  | 0.535352 | 0.662321 |
| MUM1   | -1.28835 | -2.12658 | 0.033864 | 0.082007 | 0.033665 | 0.081601 |
| MUS81  | 1.339742 | 2.754828 | 0.006051 | 0.020881 | 0.006086 | 0.020986 |
| MUSK   | 0.193839 | 0.298135 | 0.765704 | 0.844989 | 0.765352 | 0.844671 |
| MUT    | -1.3232  | -2.36553 | 0.018323 | 0.050243 | 0.018259 | 0.050067 |
| MUTYH  | 2.404014 | 4.049561 | 5.81E-05 | 0.00044  | 5.71E-05 | 0.000434 |
| MVD    | -0.07744 | -0.12074 | 0.903935 | 0.942047 | 0.903795 | 0.942079 |
| MVK    | -1.19089 | -1.3356  | 0.182189 | 0.302468 | 0.180923 | 0.301218 |

|         |          |          |          |          |          |          |
|---------|----------|----------|----------|----------|----------|----------|
| MVP     | 1.368961 | 3.514535 | 0.000474 | 0.002557 | 0.000496 | 0.002646 |
| MX1     | -0.12306 | -0.20881 | 0.834664 | 0.893604 | 0.834514 | 0.893444 |
| MX2     | 0.853938 | 1.024828 | 0.305859 | 0.447691 | 0.304565 | 0.446215 |
| MXD4    | -0.63969 | -1.81082 | 0.07067  | 0.146129 | 0.072162 | 0.148886 |
| MYB     | -3.43216 | -4.32173 | 1.81E-05 | 0.000165 | 1.73E-05 | 0.000158 |
| MYBPH   | -3.09014 | -3.19816 | 0.001456 | 0.006511 | 0.001407 | 0.006327 |
| MYCBP2  | -2.91161 | -4.27702 | 2.20E-05 | 0.000197 | 2.13E-05 | 0.00019  |
| MYCL1   | 1.813797 | 2.90982  | 0.003751 | 0.014182 | 0.003706 | 0.014057 |
| MYD88   | 0.684632 | 0.981837 | 0.326577 | 0.467712 | 0.325647 | 0.466629 |
| MYEOV   | 0.624587 | 0.699025 | 0.484808 | 0.617507 | 0.48354  | 0.616559 |
| MYH10   | 2.610348 | 4.421626 | 1.16E-05 | 0.000114 | 1.14E-05 | 0.000113 |
| MYH11   | 0.761414 | 1.539818 | 0.124134 | 0.226398 | 0.124338 | 0.226357 |
| MYH9    | 0.590685 | 1.277497 | 0.201923 | 0.326578 | 0.202491 | 0.327272 |
| MYL6    | 1.188928 | 5.007114 | 7.28E-07 | 1.13E-05 | 1.10E-06 | 1.62E-05 |
| MYL9    | 1.03884  | 2.563056 | 0.010619 | 0.032557 | 0.01085  | 0.033048 |
| MYLIP   | -0.0462  | -0.06908 | 0.944952 | 0.967809 | 0.944858 | 0.967713 |
| MYLK    | 0.410287 | 1.126652 | 0.260341 | 0.398438 | 0.262591 | 0.40096  |
| MYO10   | -0.16696 | -0.37203 | 0.710004 | 0.805222 | 0.710451 | 0.805383 |
| MYO1C   | 1.591716 | 4.10628  | 4.58E-05 | 0.000361 | 4.87E-05 | 0.000379 |
| MYO1D   | -0.12733 | -0.1483  | 0.882158 | 0.926752 | 0.881833 | 0.926378 |
| MYO1E   | -0.23911 | -0.54559 | 0.585554 | 0.704945 | 0.586269 | 0.705765 |
| MYO1F   | -1.35628 | -1.61138 | 0.107624 | 0.202655 | 0.106672 | 0.201188 |
| MYO5A   | -2.24245 | -3.6625  | 0.000272 | 0.001632 | 0.000267 | 0.001611 |
| MYO6    | -0.24993 | -0.25764 | 0.796775 | 0.866862 | 0.796151 | 0.866249 |
| MYO7A   | -0.17967 | -0.17602 | 0.860335 | 0.91277  | 0.859883 | 0.912292 |
| MYO7B   | -2.31957 | -2.37708 | 0.017764 | 0.049227 | 0.017407 | 0.048352 |
| MYO9A   | -2.15477 | -3.02494 | 0.002594 | 0.010512 | 0.002541 | 0.010318 |
| MYO9B   | 1.370715 | 3.932752 | 9.38E-05 | 0.000653 | 0.000102 | 0.000701 |
| MYOC    | 1.24344  | 2.12654  | 0.033867 | 0.082007 | 0.033711 | 0.081672 |
| MYOM2   | 2.658027 | 3.932415 | 9.39E-05 | 0.000653 | 9.13E-05 | 0.00064  |
| MYST1   | 1.422613 | 2.56567  | 0.01054  | 0.032384 | 0.010503 | 0.032327 |
| MYST3   | 0.34456  | 0.433518 | 0.664795 | 0.771871 | 0.664007 | 0.771314 |
| N4BP1   | -3.63932 | -3.17995 | 0.001549 | 0.006829 | 0.001491 | 0.006624 |
| NAALAD2 | -0.36177 | -1.22546 | 0.220883 | 0.350372 | 0.225244 | 0.356807 |
| NAB1    | 1.770882 | 4.27253  | 2.25E-05 | 0.000199 | 2.36E-05 | 0.000208 |
| NADSYN1 | -1.73581 | -2.12533 | 0.033969 | 0.082168 | 0.033505 | 0.081297 |
| NAGLU   | 1.912144 | 2.882283 | 0.00409  | 0.015148 | 0.004028 | 0.014976 |
| NAGPA   | -0.28704 | -0.61637 | 0.537882 | 0.664991 | 0.538364 | 0.664996 |
| NANS    | -1.51265 | -2.94508 | 0.003354 | 0.012954 | 0.003359 | 0.013005 |
| NAP1L4  | -1.26756 | -1.83891 | 0.066424 | 0.139559 | 0.065918 | 0.138805 |
| NAPG    | 0.70916  | 1.791813 | 0.073668 | 0.151395 | 0.074626 | 0.152896 |

|         |          |          |          |          |          |          |
|---------|----------|----------|----------|----------|----------|----------|
| NAPSB   | 0.0502   | 0.05954  | 0.952542 | 0.972398 | 0.952413 | 0.972272 |
| NARF    | 0.311424 | 0.388112 | 0.698071 | 0.797117 | 0.697342 | 0.796428 |
| NARS    | -0.05239 | -0.11939 | 0.905008 | 0.942539 | 0.905186 | 0.942902 |
| NASP    | -0.9273  | -1.84637 | 0.065332 | 0.137995 | 0.065437 | 0.13804  |
| NAT2    | -1.66159 | -2.54061 | 0.011317 | 0.034229 | 0.011188 | 0.033859 |
| NAT8    | 1.158225 | 1.352332 | 0.17678  | 0.296231 | 0.175583 | 0.294685 |
| NBEA    | 0.689016 | 1.318181 | 0.187948 | 0.309298 | 0.187959 | 0.309208 |
| NBL1    | 0.617044 | 1.148801 | 0.251097 | 0.387699 | 0.250999 | 0.388057 |
| NCAM1   | 1.327726 | 2.628787 | 0.008789 | 0.028121 | 0.008811 | 0.028133 |
| NCAM2   | 0.326383 | 0.602912 | 0.546796 | 0.672056 | 0.546687 | 0.671985 |
| NCBP1   | -0.7384  | -2.30622 | 0.021439 | 0.056929 | 0.02241  | 0.058874 |
| NCBP2   | -0.33311 | -0.55358 | 0.580072 | 0.700138 | 0.579669 | 0.699832 |
| NCF2    | 2.049867 | 5.142325 | 3.68E-07 | 6.03E-06 | 4.00E-07 | 6.59E-06 |
| NCF4    | 5.437563 | 6.566433 | 1.12E-10 | 5.71E-09 | 9.98E-11 | 5.21E-09 |
| NCK1    | 1.157794 | 2.662959 | 0.007954 | 0.026107 | 0.008078 | 0.026367 |
| NCKIPSD | 2.556558 | 7.924786 | 1.12E-14 | 1.60E-12 | 1.68E-14 | 2.39E-12 |
| NCL     | -0.24299 | -0.58174 | 0.560964 | 0.684636 | 0.561959 | 0.685531 |
| NCOA1   | 2.061784 | 4.570154 | 5.92E-06 | 6.52E-05 | 6.11E-06 | 6.71E-05 |
| NCOA2   | 0.331868 | 0.392896 | 0.694537 | 0.794626 | 0.693746 | 0.794298 |
| NCOA3   | -1.21909 | -4.25908 | 2.38E-05 | 0.000208 | 2.88E-05 | 0.000244 |
| NCOA4   | 2.885472 | 6.526834 | 1.43E-10 | 6.95E-09 | 1.53E-10 | 7.41E-09 |
| NCOA5   | -1.05688 | -1.18994 | 0.234541 | 0.368307 | 0.233192 | 0.366924 |
| NCOA6   | -1.05163 | -1.66848 | 0.095744 | 0.1845   | 0.095291 | 0.183853 |
| NDN     | 0.299113 | 0.542765 | 0.587494 | 0.706519 | 0.587338 | 0.706369 |
| NDP     | -2.40972 | -2.83129 | 0.004792 | 0.017298 | 0.004677 | 0.016943 |
| NDRG1   | -2.204   | -4.66165 | 3.87E-06 | 4.55E-05 | 3.95E-06 | 4.61E-05 |
| NDST2   | -1.63847 | -2.35659 | 0.018765 | 0.051098 | 0.018539 | 0.050629 |
| NDUFA1  | 1.083845 | 3.439979 | 0.000622 | 0.003214 | 0.000685 | 0.003486 |
| NDUFA10 | 1.675525 | 2.030035 | 0.042795 | 0.098645 | 0.042248 | 0.097626 |
| NDUFA11 | 3.559715 | 4.479292 | 8.97E-06 | 9.13E-05 | 8.52E-06 | 8.74E-05 |
| NDUFA3  | 0.420917 | 0.815469 | 0.415128 | 0.552877 | 0.415195 | 0.552809 |
| NDUFA4  | -1.23462 | -3.00452 | 0.002771 | 0.01106  | 0.002846 | 0.011326 |
| NDUFA5  | 1.257987 | 2.918428 | 0.00365  | 0.013903 | 0.003721 | 0.014081 |
| NDUFA7  | -0.15169 | -0.21833 | 0.827243 | 0.887884 | 0.826919 | 0.887739 |
| NDUFA9  | 2.406707 | 3.023402 | 0.002607 | 0.010538 | 0.002542 | 0.010318 |
| NDUFAB1 | 2.020989 | 5.515318 | 5.19E-08 | 1.09E-06 | 5.93E-08 | 1.23E-06 |
| NDUFB11 | 1.795364 | 4.458107 | 9.88E-06 | 9.96E-05 | 1.05E-05 | 0.000106 |
| NDUFB2  | 1.871142 | 2.221507 | 0.02669  | 0.067371 | 0.02628  | 0.066514 |
| NDUFB5  | 1.00051  | 1.749481 | 0.080721 | 0.162549 | 0.080506 | 0.162046 |
| NDUFB7  | -0.40458 | -1.30601 | 0.192051 | 0.313634 | 0.195689 | 0.318249 |
| NDUFB8  | -1.29299 | -4.18631 | 3.26E-05 | 0.000271 | 3.77E-05 | 0.000307 |

|        |          |          |          |          |          |          |
|--------|----------|----------|----------|----------|----------|----------|
| NDUFC1 | 0.482698 | 0.842571 | 0.399805 | 0.537957 | 0.399468 | 0.537811 |
| NDUFC2 | -2.02331 | -3.21982 | 0.001352 | 0.006111 | 0.001332 | 0.006025 |
| NDUFS1 | 0.040939 | 0.077283 | 0.938424 | 0.963946 | 0.938419 | 0.963899 |
| NDUFS2 | -0.73513 | -1.69413 | 0.090762 | 0.17752  | 0.091415 | 0.1785   |
| NDUFS3 | -0.69429 | -2.45259 | 0.014468 | 0.041615 | 0.015531 | 0.043948 |
| NDUFS4 | 0.089548 | 0.217438 | 0.827942 | 0.88843  | 0.828405 | 0.888928 |
| NDUFS8 | 0.155848 | 0.533782 | 0.593691 | 0.712301 | 0.597275 | 0.715698 |
| NDUFV1 | -0.50696 | -1.81437 | 0.070122 | 0.145572 | 0.07324  | 0.150393 |
| NDUFV2 | -0.20407 | -0.31831 | 0.750361 | 0.83334  | 0.750008 | 0.833342 |
| NDUFV3 | -0.19674 | -0.34061 | 0.733514 | 0.823855 | 0.733315 | 0.823556 |
| NEBL   | -0.81863 | -0.98678 | 0.324149 | 0.465134 | 0.322862 | 0.464205 |
| NECAP1 | 0.801037 | 1.052047 | 0.293203 | 0.435542 | 0.29208  | 0.43456  |
| NEDD1  | 4.665518 | 8.071843 | 3.82E-15 | 5.61E-13 | 3.59E-15 | 5.28E-13 |
| NEDD4  | -0.49875 | -0.79609 | 0.426294 | 0.563582 | 0.425681 | 0.562786 |
| NEDD8  | -0.28131 | -1.20937 | 0.227    | 0.358864 | 0.235257 | 0.369185 |
| NEDD9  | -0.83851 | -1.3938  | 0.163897 | 0.278695 | 0.163448 | 0.278241 |
| NEFH   | -3.37024 | -5.28546 | 1.76E-07 | 3.18E-06 | 1.69E-07 | 3.05E-06 |
| NEFL   | 0.238628 | 0.250405 | 0.80236  | 0.869717 | 0.801762 | 0.869306 |
| NEK2   | -0.52096 | -1.24472 | 0.213723 | 0.340854 | 0.214871 | 0.342337 |
| NEK3   | 0.781213 | 1.229456 | 0.219384 | 0.348729 | 0.218734 | 0.347784 |
| NEK4   | 0.987909 | 1.156224 | 0.248051 | 0.384132 | 0.246746 | 0.382615 |
| NEK7   | 2.76327  | 4.233157 | 2.67E-05 | 0.00023  | 2.59E-05 | 0.000224 |
| NELL1  | 2.709548 | 4.359799 | 1.53E-05 | 0.000143 | 1.49E-05 | 0.000139 |
| NEO1   | 1.908096 | 5.629669 | 2.78E-08 | 6.40E-07 | 3.34E-08 | 7.49E-07 |
| NET1   | 1.008305 | 2.021856 | 0.043636 | 0.100485 | 0.043732 | 0.100409 |
| NETO2  | 1.199864 | 1.341528 | 0.180258 | 0.300191 | 0.178993 | 0.298852 |
| NEU1   | -2.53912 | -2.62885 | 0.008788 | 0.028121 | 0.008578 | 0.027596 |
| NEXN   | -0.77989 | -1.67913 | 0.093648 | 0.181504 | 0.094044 | 0.18212  |
| NF1    | 2.165338 | 3.77459  | 0.000176 | 0.001116 | 0.000174 | 0.001105 |
| NF2    | -2.0466  | -3.61821 | 0.000322 | 0.001867 | 0.000319 | 0.001857 |
| NFASC  | 0.907835 | 2.122627 | 0.034195 | 0.082589 | 0.034591 | 0.083203 |
| NFAT5  | -0.66507 | -1.61126 | 0.107651 | 0.202655 | 0.108601 | 0.203925 |
| NFATC1 | 0.379749 | 1.232857 | 0.218114 | 0.347267 | 0.221946 | 0.352057 |
| NFATC2 | 2.734724 | 4.041358 | 6.01E-05 | 0.000452 | 5.83E-05 | 0.000442 |
| NFATC3 | -1.58003 | -3.39762 | 0.000725 | 0.003652 | 0.000735 | 0.003688 |
| NFATC4 | 0.312976 | 0.441602 | 0.658937 | 0.767155 | 0.658297 | 0.76641  |
| NFE2   | 1.531891 | 1.812752 | 0.070371 | 0.145831 | 0.069608 | 0.144498 |
| NFE2L2 | 0.529092 | 1.494271 | 0.135632 | 0.242385 | 0.137685 | 0.244935 |
| NFE2L3 | 1.531804 | 2.407573 | 0.016361 | 0.045853 | 0.016208 | 0.045451 |
| NFIC   | -1.02942 | -1.49961 | 0.134244 | 0.240716 | 0.133526 | 0.239807 |
| NFIL3  | 1.718444 | 2.417796 | 0.015913 | 0.044811 | 0.015701 | 0.044351 |

|          |          |          |          |          |          |          |
|----------|----------|----------|----------|----------|----------|----------|
| NFIX     | 0.537939 | 0.989088 | 0.32302  | 0.464387 | 0.32287  | 0.464205 |
| NFKB1    | 0.093541 | 0.18048  | 0.856837 | 0.910087 | 0.856852 | 0.91     |
| NFKB2    | -0.28485 | -0.43238 | 0.665618 | 0.772446 | 0.66511  | 0.771855 |
| NFKBIB   | 1.717814 | 4.068847 | 5.36E-05 | 0.00041  | 5.57E-05 | 0.000425 |
| NFKBIE   | 0.310628 | 0.497607 | 0.618944 | 0.733674 | 0.618488 | 0.733139 |
| NFKBIL1  | 0.289091 | 0.602418 | 0.547124 | 0.672284 | 0.547468 | 0.672706 |
| NFRKB    | -0.7024  | -0.61214 | 0.540677 | 0.667152 | 0.539256 | 0.665574 |
| NFS1     | -0.35789 | -0.98227 | 0.326366 | 0.467658 | 0.328644 | 0.469634 |
| NFX1     | -0.76943 | -2.1941  | 0.028612 | 0.071416 | 0.02948  | 0.073095 |
| NFYA     | 2.262286 | 3.038172 | 0.002484 | 0.01017  | 0.002429 | 0.009996 |
| NFYB     | -2.89221 | -4.61694 | 4.77E-06 | 5.40E-05 | 4.63E-06 | 5.27E-05 |
| NFYC     | 0.941572 | 1.308037 | 0.191363 | 0.31262  | 0.190441 | 0.311764 |
| NGEF     | -1.50651 | -1.62277 | 0.105166 | 0.199145 | 0.104118 | 0.1974   |
| NHLH1    | -0.6417  | -1.02888 | 0.303953 | 0.445595 | 0.303326 | 0.444954 |
| NHLRC2   | 1.468869 | 2.194611 | 0.028575 | 0.071362 | 0.028303 | 0.070608 |
| NHP2L1   | -0.9767  | -1.25135 | 0.211298 | 0.337724 | 0.210189 | 0.336424 |
| NID2     | -0.0257  | -0.04622 | 0.963147 | 0.97792  | 0.963129 | 0.977902 |
| NIN      | 2.535921 | 3.48318  | 0.000532 | 0.002805 | 0.000517 | 0.002734 |
| NINJ1    | 0.414744 | 0.792714 | 0.428259 | 0.565112 | 0.428269 | 0.565411 |
| NIPBL    | 0.888981 | 2.051696 | 0.040634 | 0.094874 | 0.041043 | 0.095497 |
| NIPSNAP1 | 0.921233 | 1.40013  | 0.161993 | 0.27676  | 0.161315 | 0.275903 |
| NISCH    | 1.783831 | 5.954417 | 4.45E-09 | 1.34E-07 | 6.03E-09 | 1.71E-07 |
| NKG7     | 0.232787 | 0.314402 | 0.753325 | 0.83466  | 0.752799 | 0.834274 |
| NKRF     | 0.936497 | 2.174777 | 0.030038 | 0.074188 | 0.030386 | 0.074929 |
| NKTR     | -0.52121 | -0.99749 | 0.318929 | 0.460795 | 0.318944 | 0.46093  |
| NKX2-5   | -1.78355 | -1.85039 | 0.06475  | 0.137022 | 0.063918 | 0.135688 |
| NLGN3    | 0.133003 | 0.191784 | 0.847976 | 0.902319 | 0.847692 | 0.902208 |
| NLK      | 1.150043 | 1.751932 | 0.080298 | 0.161905 | 0.079813 | 0.161135 |
| NMB      | -2.0372  | -2.30206 | 0.021674 | 0.057359 | 0.021299 | 0.05666  |
| NME1     | -0.11021 | -0.25162 | 0.801424 | 0.869705 | 0.801796 | 0.869306 |
| NME5     | -1.59602 | -1.90936 | 0.056693 | 0.124688 | 0.05603  | 0.123519 |
| NME6     | 0.340491 | 0.481548 | 0.630303 | 0.743021 | 0.629622 | 0.742218 |
| NMI      | 0.049244 | 0.090674 | 0.927782 | 0.956267 | 0.927761 | 0.956455 |
| NMNAT3   | -0.91147 | -2.04616 | 0.041178 | 0.095672 | 0.04152  | 0.096414 |
| NMT1     | -0.21901 | -0.6968  | 0.486197 | 0.618604 | 0.489599 | 0.621251 |
| NMU      | 1.252052 | 1.646472 | 0.100192 | 0.191346 | 0.099404 | 0.19015  |
| NNAT     | 1.481285 | 1.619926 | 0.105775 | 0.199897 | 0.10474  | 0.198419 |
| NNMT     | -0.86064 | -1.62103 | 0.105538 | 0.199609 | 0.105498 | 0.199373 |
| NNT      | 0.419223 | 0.748554 | 0.45442  | 0.589993 | 0.454175 | 0.589838 |
| NODAL    | 0.41998  | 0.526141 | 0.598985 | 0.716709 | 0.598065 | 0.716155 |
| NOLC1    | 2.541406 | 3.311846 | 0.000983 | 0.00467  | 0.000956 | 0.004546 |

|        |          |          |          |          |          |          |
|--------|----------|----------|----------|----------|----------|----------|
| NOS1   | 0.462923 | 0.572323 | 0.567318 | 0.689525 | 0.566323 | 0.688672 |
| NOS3   | 0.783362 | 0.899456 | 0.368772 | 0.507534 | 0.36742  | 0.506415 |
| NOTCH1 | 0.568719 | 1.079246 | 0.280913 | 0.420897 | 0.280892 | 0.420846 |
| NOTCH3 | 0.101048 | 0.291849 | 0.770503 | 0.847896 | 0.771769 | 0.848494 |
| NOV    | -1.44221 | -2.67143 | 0.007759 | 0.02559  | 0.007742 | 0.025589 |
| NOVA1  | -0.86085 | -1.74072 | 0.082247 | 0.164564 | 0.082413 | 0.164685 |
| NPAT   | 1.573565 | 1.941619 | 0.052653 | 0.11745  | 0.052045 | 0.116482 |
| NPC1   | 0.035802 | 0.048248 | 0.961534 | 0.976705 | 0.961449 | 0.976618 |
| NPC2   | -0.8717  | -2.78796 | 0.005473 | 0.019224 | 0.005851 | 0.020377 |
| NPDC1  | -0.4079  | -0.46159 | 0.644544 | 0.753946 | 0.643594 | 0.75321  |
| NPEPL1 | -0.42303 | -1.28176 | 0.200423 | 0.324487 | 0.203436 | 0.328461 |
| NPFF   | 1.299968 | 3.12193  | 0.001883 | 0.008026 | 0.001934 | 0.008213 |
| NPHP1  | 0.641257 | 1.193771 | 0.233041 | 0.366318 | 0.232943 | 0.366655 |
| NPIP   | 0.035295 | 0.091867 | 0.926834 | 0.955709 | 0.927111 | 0.956099 |
| NPTX1  | 0.043762 | 0.074721 | 0.940462 | 0.965102 | 0.94041  | 0.965049 |
| NPTX2  | -1.32668 | -1.77551 | 0.076322 | 0.155604 | 0.075662 | 0.154535 |
| NPTXR  | -0.59866 | -0.625   | 0.532212 | 0.659651 | 0.530939 | 0.658768 |
| NPY    | 3.546508 | 5.628339 | 2.80E-08 | 6.42E-07 | 2.67E-08 | 6.19E-07 |
| NQO1   | -0.42952 | -0.69851 | 0.485132 | 0.617695 | 0.484606 | 0.616915 |
| NQO2   | 0.119362 | 0.171803 | 0.863651 | 0.913925 | 0.863394 | 0.913541 |
| NR0B2  | -1.7035  | -2.13125 | 0.033476 | 0.081325 | 0.033303 | 0.080478 |
| NR1D2  | -0.32256 | -0.69502 | 0.487313 | 0.619354 | 0.487845 | 0.619528 |
| NR1H2  | 1.665558 | 1.811975 | 0.070491 | 0.145952 | 0.069654 | 0.144498 |
| NR1I2  | 1.919884 | 3.456047 | 0.000587 | 0.003069 | 0.000583 | 0.003039 |
| NR2C1  | -1.14074 | -1.8744  | 0.061363 | 0.131812 | 0.061066 | 0.131474 |
| NR2C2  | 1.49673  | 2.277526 | 0.023107 | 0.060101 | 0.022886 | 0.059724 |
| NR2F1  | -0.22978 | -0.45099 | 0.652159 | 0.76096  | 0.652245 | 0.760871 |
| NR2F2  | -2.17907 | -4.94897 | 9.71E-07 | 1.44E-05 | 1.01E-06 | 1.50E-05 |
| NR2F6  | -0.4838  | -1.18016 | 0.238405 | 0.372136 | 0.23972  | 0.373802 |
| NR4A1  | 1.091855 | 1.787788 | 0.074317 | 0.152261 | 0.073979 | 0.151834 |
| NR4A2  | 0.220658 | 0.332734 | 0.739452 | 0.827679 | 0.739036 | 0.827175 |
| NR4A3  | 1.117811 | 1.731152 | 0.08394  | 0.167028 | 0.083473 | 0.166309 |
| NR5A2  | 3.637574 | 6.505366 | 1.64E-10 | 7.70E-09 | 1.59E-10 | 7.57E-09 |
| NR6A1  | 1.035348 | 1.745573 | 0.081399 | 0.1634   | 0.081103 | 0.16276  |
| NRCAM  | 1.279815 | 1.869106 | 0.062097 | 0.133024 | 0.061618 | 0.13218  |
| NRD1   | -2.26037 | -3.51127 | 0.00048  | 0.002582 | 0.00047  | 0.002539 |
| NRF1   | 2.215696 | 4.758925 | 2.44E-06 | 3.08E-05 | 2.51E-06 | 3.14E-05 |
| NRG1   | -1.56773 | -2.45171 | 0.014503 | 0.041665 | 0.01436  | 0.041431 |
| NRGN   | 1.772472 | 2.503126 | 0.012576 | 0.037197 | 0.012399 | 0.036743 |
| NRIP1  | 0.494507 | 1.309077 | 0.191011 | 0.312262 | 0.192821 | 0.314673 |
| NRK    | 0.918591 | 2.463962 | 0.014021 | 0.040579 | 0.014435 | 0.041596 |

|        |          |          |          |          |          |          |
|--------|----------|----------|----------|----------|----------|----------|
| NRP1   | 1.648438 | 3.36586  | 0.000812 | 0.003996 | 0.000818 | 0.004038 |
| NRP2   | 1.176442 | 2.574037 | 0.010291 | 0.031781 | 0.010396 | 0.032088 |
| NRXN1  | 0.570597 | 1.044889 | 0.296497 | 0.438356 | 0.29633  | 0.438386 |
| NRXN3  | 3.197128 | 4.212992 | 2.91E-05 | 0.000247 | 2.79E-05 | 0.000238 |
| NSD1   | 1.083858 | 2.688799 | 0.007371 | 0.024517 | 0.00755  | 0.02506  |
| NSDHL  | 0.017308 | 0.052568 | 0.958094 | 0.975293 | 0.958375 | 0.975335 |
| NSF    | -0.87794 | -1.48795 | 0.137291 | 0.244698 | 0.136925 | 0.244137 |
| NSFL1C | 0.237954 | 0.437826 | 0.66167  | 0.769291 | 0.661574 | 0.769082 |
| NSMAF  | -0.3254  | -0.53937 | 0.589832 | 0.708643 | 0.589431 | 0.708161 |
| NSMCE1 | 1.99177  | 3.990357 | 7.42E-05 | 0.00054  | 7.47E-05 | 0.000543 |
| NSUN2  | 0.835508 | 1.876884 | 0.061021 | 0.131498 | 0.06146  | 0.132021 |
| NSUN4  | 0.819968 | 2.363106 | 0.018442 | 0.050451 | 0.019105 | 0.051844 |
| NT5C   | 0.124652 | 0.429188 | 0.667941 | 0.773995 | 0.671017 | 0.776186 |
| NT5C2  | -0.71645 | -2.60703 | 0.009361 | 0.029508 | 0.0102   | 0.031621 |
| NT5E   | 1.972332 | 2.807701 | 0.005152 | 0.018346 | 0.005065 | 0.018103 |
| NTHL1  | -1.19898 | -1.3395  | 0.180918 | 0.300997 | 0.17965  | 0.29963  |
| NUBP1  | -1.29526 | -1.75231 | 0.080233 | 0.161844 | 0.079569 | 0.160711 |
| NUBP2  | 2.119702 | 2.227675 | 0.026273 | 0.066461 | 0.025813 | 0.065649 |
| NUCB1  | -0.23917 | -0.99411 | 0.32057  | 0.462456 | 0.328454 | 0.469506 |
| NUCB2  | 1.856896 | 2.761093 | 0.005938 | 0.020577 | 0.005851 | 0.020377 |
| NUDT1  | 0.619585 | 1.252074 | 0.211032 | 0.337701 | 0.211279 | 0.337529 |
| NUDT4  | -1.75049 | -2.76066 | 0.005945 | 0.020577 | 0.005875 | 0.020394 |
| NUDT5  | -0.64066 | -1.03556 | 0.300826 | 0.442252 | 0.300224 | 0.442214 |
| NUMA1  | -4.87493 | -6.37527 | 3.65E-10 | 1.40E-08 | 3.32E-10 | 1.34E-08 |
| NUMB   | 2.209755 | 5.401317 | 9.56E-08 | 1.88E-06 | 1.03E-07 | 2.04E-06 |
| NUP107 | 0.928742 | 1.39966  | 0.162134 | 0.276793 | 0.161436 | 0.276009 |
| NUP153 | -4.04927 | -4.6424  | 4.24E-06 | 4.88E-05 | 3.98E-06 | 4.62E-05 |
| NUP155 | 0.786505 | 1.299126 | 0.194401 | 0.316703 | 0.193908 | 0.316228 |
| NUP210 | 1.04991  | 2.480221 | 0.013404 | 0.039155 | 0.013621 | 0.039715 |
| NUP35  | 2.300525 | 4.591112 | 5.38E-06 | 5.97E-05 | 5.42E-06 | 6.03E-05 |
| NUP50  | 1.523865 | 2.993054 | 0.002876 | 0.011401 | 0.002883 | 0.011453 |
| NUP54  | -1.03377 | -2.65168 | 0.008222 | 0.026723 | 0.00845  | 0.02737  |
| NUP62  | 1.977151 | 4.811933 | 1.89E-06 | 2.49E-05 | 2.02E-06 | 2.67E-05 |
| NUP88  | 1.533282 | 2.132057 | 0.033409 | 0.081233 | 0.033043 | 0.080478 |
| NUP98  | 1.602026 | 3.043169 | 0.002444 | 0.010022 | 0.002442 | 0.010033 |
| NUPL2  | -1.1299  | -2.38981 | 0.017166 | 0.047824 | 0.017276 | 0.048047 |
| NUTF2  | -0.60183 | -1.48116 | 0.13909  | 0.246807 | 0.140247 | 0.248447 |
| NVL    | 0.9056   | 1.899411 | 0.057991 | 0.126536 | 0.058221 | 0.126801 |
| NXT2   | -0.00481 | -0.01139 | 0.990914 | 0.993662 | 0.990935 | 0.993684 |
| OAS1   | -0.06973 | -0.08218 | 0.934529 | 0.961955 | 0.93435  | 0.961771 |
| OAS2   | -1.12623 | -1.70573 | 0.088578 | 0.174264 | 0.088057 | 0.173311 |



|         |          |          |          |          |          |          |
|---------|----------|----------|----------|----------|----------|----------|
| OAT     | -1.05048 | -1.68492 | 0.092527 | 0.180073 | 0.092104 | 0.179547 |
| OAZ1    | -0.9736  | -4.04314 | 5.96E-05 | 0.000449 | 7.80E-05 | 0.00056  |
| OBFC1   | -3.4577  | -3.10478 | 0.001994 | 0.008422 | 0.001924 | 0.008182 |
| OCIAD1  | 0.068584 | 0.141663 | 0.887394 | 0.930348 | 0.88748  | 0.930439 |
| OCLN    | 0.460368 | 0.768867 | 0.442276 | 0.578058 | 0.441806 | 0.577123 |
| OCRL    | 1.774522 | 3.53683  | 0.000436 | 0.002385 | 0.000438 | 0.002393 |
| ODC1    | 1.296809 | 2.292555 | 0.02222  | 0.058294 | 0.022135 | 0.058283 |
| ODF2    | 1.635124 | 2.294585 | 0.022102 | 0.058164 | 0.021832 | 0.05781  |
| ODF3L1  | 0.704024 | 1.22042  | 0.222787 | 0.353034 | 0.222431 | 0.352708 |
| ODZ3    | 0.638015 | 1.333709 | 0.182807 | 0.30328  | 0.183195 | 0.303709 |
| OFD1    | 0.859684 | 1.745879 | 0.081345 | 0.1634   | 0.081523 | 0.163417 |
| OGFR    | -0.24728 | -0.38737 | 0.698618 | 0.797161 | 0.698206 | 0.796691 |
| OLFM1   | 1.244218 | 2.645693 | 0.008367 | 0.027083 | 0.008435 | 0.02736  |
| OLFML2A | -1.18273 | -1.38472 | 0.166655 | 0.282772 | 0.165486 | 0.28089  |
| OLR1    | 3.619198 | 4.428223 | 1.13E-05 | 0.000112 | 1.07E-05 | 0.000107 |
| OPA1    | 0.670842 | 1.048382 | 0.294886 | 0.436709 | 0.294185 | 0.436448 |
| OPCML   | 1.421108 | 2.292657 | 0.022214 | 0.058294 | 0.022045 | 0.058079 |
| OPHN1   | 0.186308 | 0.226435 | 0.820941 | 0.883338 | 0.820478 | 0.88284  |
| OPTN    | 2.677067 | 3.63375  | 0.000303 | 0.001773 | 0.000294 | 0.001744 |
| ORMDL1  | 2.475081 | 4.924182 | 1.10E-06 | 1.60E-05 | 1.11E-06 | 1.62E-05 |
| OSBP    | 1.612707 | 2.832193 | 0.004779 | 0.017264 | 0.00475  | 0.017172 |
| OSBPL10 | -1.83412 | -2.29936 | 0.021828 | 0.057604 | 0.021497 | 0.057019 |
| OSBPL11 | -1.16278 | -1.88656 | 0.059704 | 0.12918  | 0.059391 | 0.128507 |
| OSBPL2  | 0.238527 | 0.531442 | 0.59531  | 0.713582 | 0.595903 | 0.714476 |
| OSBPL6  | -0.17863 | -0.22742 | 0.820175 | 0.882717 | 0.819741 | 0.882312 |
| OSBPL8  | -1.95215 | -4.82272 | 1.80E-06 | 2.39E-05 | 1.92E-06 | 2.56E-05 |
| OSBPL9  | -4.09296 | -5.27485 | 1.86E-07 | 3.32E-06 | 1.74E-07 | 3.12E-06 |
| OSGEP   | 0.89567  | 1.995229 | 0.046471 | 0.105514 | 0.04682  | 0.106102 |
| OSMR    | -1.37756 | -1.53621 | 0.125015 | 0.227652 | 0.123917 | 0.225827 |
| OSTF1   | -0.31361 | -0.36165 | 0.71774  | 0.811103 | 0.71698  | 0.810439 |
| OSTM1   | -2.60522 | -6.00211 | 3.38E-09 | 1.07E-07 | 3.61E-09 | 1.14E-07 |
| OTC     | -3.14289 | -2.7568  | 0.006015 | 0.020788 | 0.005841 | 0.020377 |
| OTOF    | 0.378195 | 0.359734 | 0.719173 | 0.812332 | 0.718277 | 0.81132  |
| OTUB1   | 0.2379   | 0.331948 | 0.740045 | 0.827822 | 0.739529 | 0.827175 |
| OVGP1   | 1.562777 | 3.866627 | 0.000122 | 0.000813 | 0.000128 | 0.000845 |
| OVOL1   | -0.13598 | -0.21216 | 0.832055 | 0.89142  | 0.831813 | 0.891161 |
| OXA1L   | -0.7428  | -1.74535 | 0.081438 | 0.1634   | 0.082131 | 0.164211 |
| OXSRI   | -0.09346 | -0.12427 | 0.901143 | 0.940149 | 0.900919 | 0.939916 |
| OXTR    | -1.77943 | -3.11854 | 0.001905 | 0.008102 | 0.001891 | 0.008049 |
| P2RX1   | -1.10195 | -1.18367 | 0.237014 | 0.370986 | 0.235597 | 0.369595 |
| P2RX4   | 2.008989 | 2.656817 | 0.008099 | 0.026415 | 0.007953 | 0.026047 |

|          |          |          |          |          |          |          |
|----------|----------|----------|----------|----------|----------|----------|
| P2RY10   | 0.697436 | 1.769394 | 0.077338 | 0.157014 | 0.078341 | 0.158776 |
| P2RY2    | -0.02745 | -0.04834 | 0.961462 | 0.976705 | 0.961437 | 0.976618 |
| P2RY6    | 2.914285 | 9.465858 | 6.62E-20 | 3.46E-17 | 1.24E-19 | 6.48E-17 |
| P4HA1    | -0.01365 | -0.03579 | 0.971462 | 0.982024 | 0.971574 | 0.982028 |
| P4HA2    | -0.59188 | -0.91494 | 0.360593 | 0.50038  | 0.359864 | 0.500107 |
| PA2G4    | 0.658604 | 2.054091 | 0.040401 | 0.094423 | 0.041882 | 0.09699  |
| PABPC1   | 0.395965 | 1.155319 | 0.248421 | 0.384451 | 0.251207 | 0.388202 |
| PABPC4   | -0.8337  | -1.18361 | 0.237036 | 0.370986 | 0.236111 | 0.370127 |
| PABPN1   | 0.82544  | 0.884877 | 0.376579 | 0.515662 | 0.375132 | 0.514011 |
| PACRG    | 1.476568 | 2.982694 | 0.002974 | 0.011705 | 0.002988 | 0.011812 |
| PAEP     | -0.1695  | -0.20743 | 0.835742 | 0.894351 | 0.83532  | 0.893899 |
| PAFAH1B1 | 3.212775 | 5.207262 | 2.64E-07 | 4.53E-06 | 2.55E-07 | 4.39E-06 |
| PAFAH1B2 | 0.386303 | 0.777424 | 0.437216 | 0.572559 | 0.437447 | 0.573021 |
| PAFAH1B3 | -0.27272 | -0.79252 | 0.428371 | 0.565112 | 0.43105  | 0.56733  |
| PAFAH2   | 0.977285 | 1.295739 | 0.195565 | 0.317875 | 0.194544 | 0.316934 |
| PAIP1    | 1.60147  | 1.688111 | 0.091911 | 0.179172 | 0.090914 | 0.177669 |
| PAK1     | -0.46201 | -1.02536 | 0.305608 | 0.447463 | 0.306364 | 0.447872 |
| PAK1IP1  | 0.593452 | 1.285191 | 0.199223 | 0.322657 | 0.199796 | 0.323473 |
| PAK2     | -0.886   | -1.86175 | 0.063129 | 0.134683 | 0.063376 | 0.135086 |
| PAK4     | -0.61295 | -1.39413 | 0.163795 | 0.278695 | 0.164578 | 0.279652 |
| PALM     | 3.501036 | 5.305116 | 1.59E-07 | 2.91E-06 | 1.51E-07 | 2.79E-06 |
| PANK3    | 0.713935 | 1.35572  | 0.1757   | 0.294714 | 0.175683 | 0.294685 |
| PANX1    | -0.26598 | -0.40762 | 0.683701 | 0.786586 | 0.683233 | 0.786094 |
| PAPOLA   | -1.09815 | -2.30503 | 0.021506 | 0.05701  | 0.021626 | 0.057295 |
| PAPPA    | -0.83712 | -1.14455 | 0.252854 | 0.389626 | 0.251834 | 0.388581 |
| PAPSS1   | 2.590733 | 4.377652 | 1.42E-05 | 0.000134 | 1.39E-05 | 0.000132 |
| PAPSS2   | 0.181491 | 0.225812 | 0.821425 | 0.883637 | 0.820978 | 0.883176 |
| PARD3    | 1.102488 | 1.41688  | 0.157039 | 0.270063 | 0.156037 | 0.26863  |
| PARD6A   | 1.383871 | 3.116813 | 0.001916 | 0.008142 | 0.00195  | 0.008258 |
| PARN     | 0.215863 | 0.335039 | 0.737713 | 0.826914 | 0.737336 | 0.826886 |
| PARP10   | -0.77784 | -1.40733 | 0.159849 | 0.273495 | 0.159663 | 0.273376 |
| PARP16   | 0.226488 | 0.300648 | 0.763788 | 0.843865 | 0.763264 | 0.843287 |
| PARP2    | -0.75761 | -1.42113 | 0.155799 | 0.268521 | 0.155738 | 0.268514 |
| PARP4    | -2.27696 | -3.12334 | 0.001875 | 0.008002 | 0.001833 | 0.007858 |
| PARVB    | -1.14172 | -1.33475 | 0.182466 | 0.302822 | 0.181258 | 0.301562 |
| PARVG    | 1.158787 | 3.212704 | 0.001386 | 0.006238 | 0.001461 | 0.006516 |
| PASK     | -0.76683 | -1.4309  | 0.152982 | 0.265026 | 0.152903 | 0.264987 |
| PAX5     | -2.43879 | -3.3552  | 0.000843 | 0.004133 | 0.000822 | 0.004049 |
| PAX6     | 0.422482 | 0.715254 | 0.474731 | 0.609461 | 0.474318 | 0.609263 |
| PAX8     | -0.0135  | -0.01844 | 0.985297 | 0.990142 | 0.985265 | 0.99011  |
| PBX1     | 0.766101 | 2.118542 | 0.034541 | 0.083233 | 0.035419 | 0.08476  |

|         |          |          |          |          |          |          |
|---------|----------|----------|----------|----------|----------|----------|
| PBX3    | 0.014046 | 0.025819 | 0.97941  | 0.98607  | 0.979404 | 0.98602  |
| PCBP1   | 0.763952 | 1.690418 | 0.091469 | 0.178532 | 0.091962 | 0.179419 |
| PCBP2   | 0.095836 | 0.312914 | 0.754455 | 0.835216 | 0.75646  | 0.837147 |
| PCCB    | 4.652764 | 5.618447 | 2.96E-08 | 6.62E-07 | 2.71E-08 | 6.25E-07 |
| PCDH1   | 3.219894 | 6.834493 | 2.03E-11 | 1.35E-09 | 2.11E-11 | 1.42E-09 |
| PCDH9   | -0.62843 | -1.48545 | 0.13795  | 0.245408 | 0.13888  | 0.246594 |
| PCDHGC3 | 0.483165 | 0.721138 | 0.471106 | 0.605966 | 0.470346 | 0.60532  |
| PCGF2   | -0.88852 | -0.91295 | 0.361634 | 0.501085 | 0.360124 | 0.500321 |
| PCK2    | -1.13633 | -1.26992 | 0.204607 | 0.329897 | 0.203291 | 0.328452 |
| PCM1    | 0.321321 | 0.683986 | 0.494249 | 0.625969 | 0.494718 | 0.626901 |
| PCMT1   | -2.05444 | -7.45763 | 3.11E-13 | 3.40E-11 | 5.55E-13 | 5.92E-11 |
| PCNA    | -2.46383 | -4.96304 | 9.06E-07 | 1.36E-05 | 9.16E-07 | 1.38E-05 |
| PCNP    | 2.525842 | 3.951784 | 8.68E-05 | 0.000615 | 8.48E-05 | 0.000601 |
| PCNX    | 0.242751 | 0.95655  | 0.339181 | 0.480486 | 0.346052 | 0.487348 |
| PCNXL2  | -1.54897 | -2.90401 | 0.00382  | 0.01433  | 0.003814 | 0.014364 |
| PCOLCE  | -1.24554 | -2.99413 | 0.002866 | 0.011377 | 0.002938 | 0.011642 |
| PCP4    | -0.09189 | -0.09623 | 0.923367 | 0.954437 | 0.92313  | 0.954192 |
| PCSK7   | -0.81195 | -0.94298 | 0.346071 | 0.487211 | 0.344727 | 0.487284 |
| PCYOX1  | 0.552552 | 0.646156 | 0.518426 | 0.647746 | 0.51727  | 0.646931 |
| PDCD10  | -0.47521 | -1.15153 | 0.249976 | 0.386222 | 0.251257 | 0.388202 |
| PDCD2   | -0.07166 | -0.15557 | 0.876422 | 0.922963 | 0.876583 | 0.923132 |
| PDCD4   | -1.27887 | -3.56713 | 0.00039  | 0.002179 | 0.000416 | 0.002305 |
| PDCD5   | 2.049432 | 3.587886 | 0.000361 | 0.002047 | 0.000357 | 0.002037 |
| PDCD6   | -0.34074 | -0.90982 | 0.363283 | 0.502333 | 0.36531  | 0.504245 |
| PDCL    | -3.06566 | -3.97661 | 7.85E-05 | 0.000563 | 7.54E-05 | 0.000545 |
| PDE10A  | -0.68788 | -0.76767 | 0.442987 | 0.578827 | 0.441659 | 0.577123 |
| PDE1A   | -0.14583 | -0.2924  | 0.770078 | 0.847627 | 0.770183 | 0.847706 |
| PDE1B   | 1.730403 | 2.203034 | 0.027973 | 0.070044 | 0.027589 | 0.069157 |
| PDE2A   | 0.579623 | 1.298625 | 0.194573 | 0.316873 | 0.19532  | 0.317869 |
| PDE4A   | 0.341103 | 1.043103 | 0.297322 | 0.439162 | 0.300652 | 0.442274 |
| PDE4B   | 0.204976 | 0.319946 | 0.749121 | 0.83275  | 0.748767 | 0.832948 |
| PDE4C   | 0.325232 | 0.354048 | 0.723428 | 0.81557  | 0.722635 | 0.814676 |
| PDE4D   | -0.87688 | -0.92424 | 0.355735 | 0.496277 | 0.354255 | 0.494358 |
| PDE4DIP | 1.242845 | 2.296189 | 0.02201  | 0.057988 | 0.021972 | 0.057984 |
| PDE5A   | 1.566167 | 2.518882 | 0.012032 | 0.035906 | 0.011922 | 0.035601 |
| PDE6D   | -0.96496 | -2.18608 | 0.029197 | 0.072605 | 0.029487 | 0.073095 |
| PDE6G   | 0.955527 | 1.765688 | 0.077958 | 0.158001 | 0.077876 | 0.15797  |
| PDE7A   | 0.265727 | 0.584525 | 0.559087 | 0.682877 | 0.559661 | 0.683578 |
| PDE8A   | 0.460624 | 0.981786 | 0.326602 | 0.467712 | 0.327134 | 0.468046 |
| PDE8B   | 1.296539 | 1.424186 | 0.154914 | 0.267487 | 0.153694 | 0.265965 |
| PDE9A   | 2.035645 | 4.729037 | 2.82E-06 | 3.45E-05 | 2.95E-06 | 3.63E-05 |

|         |          |          |          |          |          |          |
|---------|----------|----------|----------|----------|----------|----------|
| PDGFD   | 1.205397 | 2.1664   | 0.030675 | 0.075498 | 0.030591 | 0.075275 |
| PDGFRA  | 0.906787 | 2.13118  | 0.033481 | 0.081325 | 0.033884 | 0.082006 |
| PDGFRL  | -0.20959 | -0.23257 | 0.816171 | 0.880828 | 0.815642 | 0.880459 |
| PDHA1   | 0.17864  | 0.54431  | 0.586431 | 0.705639 | 0.588977 | 0.707978 |
| PDK1    | 0.918393 | 2.593819 | 0.009724 | 0.030388 | 0.010109 | 0.031402 |
| PDK2    | -2.36843 | -5.94699 | 4.65E-09 | 1.37E-07 | 5.17E-09 | 1.51E-07 |
| PDK3    | 0.32997  | 0.369755 | 0.711696 | 0.806406 | 0.710897 | 0.805694 |
| PDK4    | 2.119777 | 3.001252 | 0.002801 | 0.011156 | 0.002746 | 0.011004 |
| PDLIM3  | 2.299564 | 4.170841 | 3.48E-05 | 0.000286 | 3.45E-05 | 0.000285 |
| PDPK1   | -0.4061  | -0.73047 | 0.46539  | 0.601742 | 0.465173 | 0.601296 |
| PDXK    | -0.82962 | -2.33831 | 0.0197   | 0.053151 | 0.020341 | 0.054631 |
| PEA15   | 1.717403 | 5.861567 | 7.58E-09 | 2.04E-07 | 1.04E-08 | 2.71E-07 |
| PEBP4   | 2.938688 | 5.962175 | 4.26E-09 | 1.31E-07 | 4.32E-09 | 1.32E-07 |
| PECAM1  | 2.884799 | 5.743846 | 1.47E-08 | 3.63E-07 | 1.49E-08 | 3.64E-07 |
| PEG10   | -2.4639  | -3.66562 | 0.000269 | 0.001619 | 0.000262 | 0.001581 |
| PELO    | 1.456601 | 2.116606 | 0.034706 | 0.08347  | 0.034369 | 0.082916 |
| PELP1   | 0.33666  | 0.595928 | 0.551449 | 0.676536 | 0.551206 | 0.676062 |
| PENK    | 3.854217 | 4.601778 | 5.12E-06 | 5.73E-05 | 4.82E-06 | 5.46E-05 |
| PEPD    | 0.830589 | 1.222567 | 0.221975 | 0.351985 | 0.221148 | 0.35091  |
| PER1    | 0.551028 | 1.487387 | 0.13744  | 0.24484  | 0.139176 | 0.24684  |
| PER2    | 1.073664 | 1.517695 | 0.12962  | 0.233913 | 0.128855 | 0.23302  |
| PES1    | 0.441918 | 1.076381 | 0.282191 | 0.422388 | 0.283529 | 0.42412  |
| PET112L | -2.62216 | -6.11946 | 1.70E-09 | 5.66E-08 | 1.83E-09 | 6.10E-08 |
| PEX1    | -0.39931 | -0.50375 | 0.614623 | 0.730215 | 0.613742 | 0.729721 |
| PEX11A  | 1.473794 | 3.551215 | 0.000414 | 0.002287 | 0.000428 | 0.002347 |
| PEX11B  | -0.0208  | -0.0321  | 0.974401 | 0.982741 | 0.974362 | 0.982725 |
| PEX13   | 0.588435 | 1.125481 | 0.260837 | 0.398937 | 0.260849 | 0.398825 |
| PEX14   | 0.678914 | 1.039124 | 0.299167 | 0.441055 | 0.298406 | 0.440402 |
| PEX19   | -1.10391 | -1.96158 | 0.050275 | 0.112843 | 0.050139 | 0.112587 |
| PEX5    | -0.08787 | -0.22877 | 0.819124 | 0.882244 | 0.819799 | 0.882312 |
| PEX6    | -0.21531 | -0.26103 | 0.794158 | 0.865216 | 0.793626 | 0.864637 |
| PEX7    | 0.599495 | 0.712091 | 0.476686 | 0.610969 | 0.475491 | 0.609936 |
| PFAS    | -0.33046 | -0.58607 | 0.55805  | 0.682497 | 0.557816 | 0.682033 |
| PFDN5   | 0.029506 | 0.11935  | 0.905038 | 0.942539 | 0.906467 | 0.943609 |
| PFKFB2  | 1.137317 | 1.253895 | 0.21037  | 0.336994 | 0.209026 | 0.335412 |
| PFKFB3  | -0.85043 | -1.48127 | 0.139062 | 0.246807 | 0.138771 | 0.246494 |
| PFKM    | 0.990572 | 1.296138 | 0.195428 | 0.317832 | 0.194382 | 0.31678  |
| PFKP    | 0.75549  | 0.908715 | 0.363867 | 0.502992 | 0.362588 | 0.501667 |
| PFN1    | -0.41002 | -1.59849 | 0.110463 | 0.20639  | 0.11544  | 0.214284 |
| PGC     | -4.81308 | -4.08762 | 4.95E-05 | 0.000385 | 4.66E-05 | 0.000366 |
| PGD     | -0.26494 | -0.37174 | 0.710219 | 0.805222 | 0.709657 | 0.804872 |

|         |          |          |          |          |          |          |
|---------|----------|----------|----------|----------|----------|----------|
| PGF     | -2.03813 | -2.22591 | 0.026392 | 0.066725 | 0.025946 | 0.065845 |
| PGGT1B  | -0.94539 | -1.52692 | 0.12731  | 0.230669 | 0.126833 | 0.229983 |
| PGK1    | 0.051438 | 0.107353 | 0.914545 | 0.948358 | 0.914619 | 0.948122 |
| PGLS    | -0.6678  | -1.19545 | 0.232387 | 0.365535 | 0.232141 | 0.36576  |
| PGM2    | -0.34076 | -0.75924 | 0.448007 | 0.58344  | 0.448739 | 0.58423  |
| PGM3    | -0.86807 | -1.1089  | 0.267919 | 0.406456 | 0.266752 | 0.405083 |
| PGRMC2  | -0.47176 | -1.50869 | 0.131905 | 0.237077 | 0.134984 | 0.241756 |
| PGS1    | -3.7136  | -4.65615 | 3.97E-06 | 4.64E-05 | 3.75E-06 | 4.42E-05 |
| PHACTR1 | 2.578077 | 2.803266 | 0.005223 | 0.018527 | 0.005089 | 0.018135 |
| PHACTR2 | 2.128761 | 3.050594 | 0.002385 | 0.009824 | 0.002339 | 0.009659 |
| PHC1    | -1.86595 | -2.09176 | 0.036881 | 0.087856 | 0.036336 | 0.086778 |
| PHC2    | 4.389696 | 4.905286 | 1.20E-06 | 1.72E-05 | 1.12E-06 | 1.64E-05 |
| PHF1    | -0.66842 | -1.18095 | 0.238092 | 0.371895 | 0.237797 | 0.371805 |
| PHF10   | 0.354784 | 0.473802 | 0.635814 | 0.746335 | 0.635052 | 0.745627 |
| PHF14   | 2.193668 | 4.091586 | 4.87E-05 | 0.000379 | 4.85E-05 | 0.000378 |
| PHF17   | 0.639935 | 0.902109 | 0.367362 | 0.506554 | 0.3664   | 0.505454 |
| PHF19   | 0.752852 | 1.265396 | 0.206222 | 0.331592 | 0.205774 | 0.331098 |
| PHF20   | -0.55952 | -1.53367 | 0.12564  | 0.228172 | 0.127414 | 0.230858 |
| PHF20L1 | -0.21741 | -0.50318 | 0.615021 | 0.730318 | 0.615759 | 0.731009 |
| PHF3    | 0.331027 | 0.917656 | 0.359169 | 0.499288 | 0.361519 | 0.501002 |
| PHF8    | -2.53446 | -3.162   | 0.001646 | 0.007203 | 0.001602 | 0.007033 |
| PHIP    | 1.391861 | 1.806219 | 0.071387 | 0.147416 | 0.070714 | 0.146349 |
| PHKA1   | 1.793838 | 2.147245 | 0.032175 | 0.078738 | 0.031714 | 0.077795 |
| PHKA2   | -0.39324 | -0.91372 | 0.361233 | 0.500824 | 0.362259 | 0.501507 |
| PHKB    | 1.338393 | 2.499079 | 0.012719 | 0.037478 | 0.012701 | 0.037449 |
| PHKG2   | -1.31538 | -2.22883 | 0.026196 | 0.066301 | 0.026055 | 0.066052 |
| PHLDA2  | -1.75028 | -3.81023 | 0.000153 | 0.000984 | 0.000156 | 0.001004 |
| PHLDA3  | -1.38704 | -1.52923 | 0.126736 | 0.229718 | 0.125618 | 0.228044 |
| PHPT1   | -0.40988 | -0.64763 | 0.517473 | 0.647357 | 0.516892 | 0.646931 |
| PHTF1   | 1.330543 | 2.013854 | 0.044472 | 0.101614 | 0.044123 | 0.101013 |
| PHYH    | -0.33538 | -0.41238 | 0.68021  | 0.783768 | 0.679428 | 0.783059 |
| PI3     | -2.00951 | -1.82664 | 0.068252 | 0.142255 | 0.06731  | 0.140927 |
| PIAS1   | 1.033751 | 1.424185 | 0.154915 | 0.267487 | 0.154041 | 0.266273 |
| PIAS2   | 1.743483 | 4.352476 | 1.58E-05 | 0.000146 | 1.68E-05 | 0.000155 |
| PIAS4   | 0.272997 | 1.218083 | 0.223673 | 0.354319 | 0.232683 | 0.366491 |
| PICALM  | -0.39816 | -1.10264 | 0.270627 | 0.409118 | 0.272962 | 0.411721 |
| PIGC    | -0.03632 | -0.07155 | 0.942983 | 0.966635 | 0.943001 | 0.966631 |
| PIGF    | 1.937421 | 4.084113 | 5.03E-05 | 0.000389 | 5.11E-05 | 0.000395 |
| PIGL    | -0.71138 | -1.55802 | 0.119757 | 0.220297 | 0.120276 | 0.220818 |
| PIGN    | 0.26819  | 0.334009 | 0.73849  | 0.826996 | 0.73785  | 0.827067 |
| PIGR    | 0.356293 | 0.334172 | 0.738367 | 0.826996 | 0.737519 | 0.826894 |

|         |          |          |          |          |          |          |
|---------|----------|----------|----------|----------|----------|----------|
| PIGT    | 2.98915  | 5.191098 | 2.87E-07 | 4.90E-06 | 2.80E-07 | 4.81E-06 |
| PIK3C2A | -0.27465 | -0.42515 | 0.67088  | 0.77648  | 0.670413 | 0.775903 |
| PIK3C2B | 2.6135   | 3.536294 | 0.000437 | 0.002387 | 0.000425 | 0.002336 |
| PIK3C2G | 5.777107 | 5.477218 | 6.37E-08 | 1.32E-06 | 5.75E-08 | 1.21E-06 |
| PIK3C3  | 0.745316 | 1.433556 | 0.152222 | 0.264098 | 0.152251 | 0.264149 |
| PIK3CA  | 1.28136  | 3.343424 | 0.000879 | 0.00426  | 0.00092  | 0.004414 |
| PIK3CB  | 1.647779 | 2.437119 | 0.015095 | 0.043024 | 0.014917 | 0.042593 |
| PIK3CD  | 0.200621 | 0.248503 | 0.803831 | 0.870708 | 0.803338 | 0.870376 |
| PIK3CG  | 1.564021 | 2.366753 | 0.018263 | 0.050155 | 0.018072 | 0.049739 |
| PIK3R2  | 2.179196 | 4.912663 | 1.16E-06 | 1.68E-05 | 1.21E-06 | 1.75E-05 |
| PILRA   | 2.69294  | 3.495375 | 0.000508 | 0.002697 | 0.000493 | 0.002635 |
| PILRB   | 0.183599 | 0.320899 | 0.748399 | 0.832341 | 0.748228 | 0.83258  |
| PIM1    | 0.373917 | 0.511386 | 0.60927  | 0.725689 | 0.6085   | 0.724772 |
| PIM2    | -1.96014 | -3.31022 | 0.000988 | 0.004683 | 0.000977 | 0.004638 |
| PIN1    | -0.98156 | -3.31752 | 0.000963 | 0.004592 | 0.001073 | 0.005029 |
| PINX1   | 1.222139 | 1.378574 | 0.168542 | 0.28515  | 0.167317 | 0.28369  |
| PIP5K1A | 1.363711 | 4.410305 | 1.22E-05 | 0.000119 | 1.44E-05 | 0.000135 |
| PIP5K1B | 0.516456 | 0.677218 | 0.498529 | 0.629991 | 0.497527 | 0.628934 |
| PIP5K1C | -0.18728 | -0.25935 | 0.795454 | 0.865825 | 0.795035 | 0.865438 |
| PIPOX   | -1.22579 | -2.01771 | 0.044068 | 0.101034 | 0.043828 | 0.100533 |
| PIR     | -0.10884 | -0.20295 | 0.839246 | 0.897455 | 0.839215 | 0.897394 |
| PISD    | 2.243624 | 2.544135 | 0.011205 | 0.033972 | 0.010974 | 0.033363 |
| PITPNA  | -0.60374 | -0.73686 | 0.461498 | 0.597861 | 0.460326 | 0.596343 |
| PITPNB  | 0.194667 | 0.33676  | 0.736416 | 0.826248 | 0.736218 | 0.826026 |
| PITPNC1 | -0.12342 | -0.20042 | 0.841219 | 0.897555 | 0.841029 | 0.897514 |
| PITX2   | -0.99892 | -1.12921 | 0.259261 | 0.397433 | 0.257893 | 0.395465 |
| PKHD1   | 1.121533 | 2.526879 | 0.011765 | 0.035242 | 0.01191  | 0.035601 |
| PKIA    | -1.21694 | -2.53696 | 0.011435 | 0.034451 | 0.011504 | 0.03466  |
| PKIG    | -0.83695 | -1.92871 | 0.05424  | 0.120078 | 0.054726 | 0.121041 |
| PKN1    | -0.4895  | -1.09054 | 0.275915 | 0.415375 | 0.276687 | 0.416404 |
| PKN2    | 1.43481  | 2.93297  | 0.003486 | 0.013396 | 0.003506 | 0.013472 |
| PKN3    | -0.87006 | -1.56264 | 0.118666 | 0.218832 | 0.118481 | 0.218462 |
| PKNOX1  | -0.26031 | -0.4769  | 0.633604 | 0.744858 | 0.63349  | 0.74435  |
| PKNOX2  | -0.62959 | -0.97689 | 0.329017 | 0.47031  | 0.328294 | 0.469483 |
| PKP2    | 0.711981 | 1.033228 | 0.301915 | 0.44316  | 0.301015 | 0.44253  |
| PKP4    | -1.61054 | -2.87316 | 0.004208 | 0.015476 | 0.004186 | 0.01542  |
| PLA2G2A | -4.24113 | -3.12412 | 0.00187  | 0.007989 | 0.001797 | 0.007725 |
| PLA2G5  | -0.21935 | -0.34911 | 0.727129 | 0.818957 | 0.726778 | 0.818757 |
| PLA2G6  | -0.6781  | -1.12721 | 0.260108 | 0.398438 | 0.259601 | 0.397565 |
| PLA2G7  | 1.762628 | 2.200991 | 0.028118 | 0.070258 | 0.027721 | 0.06934  |
| PLA2R1  | -0.99338 | -1.48505 | 0.138058 | 0.245507 | 0.137386 | 0.244589 |

|         |          |          |          |          |          |          |
|---------|----------|----------|----------|----------|----------|----------|
| PLAA    | -0.91006 | -1.49755 | 0.134777 | 0.241407 | 0.134335 | 0.240984 |
| PLAGL1  | 0.195425 | 0.292738 | 0.769824 | 0.847627 | 0.769445 | 0.847327 |
| PLAGL2  | 1.649486 | 2.267204 | 0.023734 | 0.061494 | 0.023437 | 0.060858 |
| PLAT    | -2.78802 | -5.30007 | 1.63E-07 | 2.97E-06 | 1.62E-07 | 2.96E-06 |
| PLAU    | 4.655626 | 5.873263 | 7.09E-09 | 1.96E-07 | 6.50E-09 | 1.83E-07 |
| PLAUR   | 0.848466 | 1.437476 | 0.151106 | 0.262647 | 0.150724 | 0.261983 |
| PLB1    | -1.13615 | -1.60937 | 0.108062 | 0.203238 | 0.107363 | 0.202147 |
| PLCB1   | 0.82431  | 1.816951 | 0.069725 | 0.144875 | 0.070136 | 0.145344 |
| PLCB2   | 3.468863 | 5.109373 | 4.35E-07 | 7.03E-06 | 4.15E-07 | 6.81E-06 |
| PLCB4   | 2.166788 | 3.147684 | 0.001728 | 0.007491 | 0.001693 | 0.007362 |
| PLCD1   | 0.237304 | 0.432929 | 0.665223 | 0.772177 | 0.665106 | 0.771855 |
| PLCG1   | 2.281551 | 5.053362 | 5.78E-07 | 9.05E-06 | 5.99E-07 | 9.39E-06 |
| PLCG2   | -1.4865  | -1.81453 | 0.070096 | 0.145572 | 0.069365 | 0.144128 |
| PLCL2   | 0.079898 | 0.101568 | 0.919133 | 0.951107 | 0.918935 | 0.950901 |
| PLCXD1  | -2.86605 | -3.13819 | 0.001784 | 0.007691 | 0.001728 | 0.007492 |
| PLD1    | -0.45976 | -0.98663 | 0.324222 | 0.465134 | 0.324791 | 0.465827 |
| PLD2    | 1.461995 | 2.684113 | 0.007474 | 0.024789 | 0.007453 | 0.024774 |
| PLEK    | 2.936046 | 4.380486 | 1.40E-05 | 0.000133 | 1.35E-05 | 0.000129 |
| PLEK2   | 3.592952 | 4.354721 | 1.57E-05 | 0.000145 | 1.49E-05 | 0.000139 |
| PLEKHA1 | 1.349288 | 2.396184 | 0.016873 | 0.047148 | 0.016807 | 0.046936 |
| PLEKHA3 | -1.45408 | -1.94915 | 0.051745 | 0.11592  | 0.051221 | 0.114911 |
| PLEKHA4 | -1.22016 | -1.40958 | 0.159184 | 0.272806 | 0.158016 | 0.271248 |
| PLEKHF2 | 0.544841 | 0.70118  | 0.483463 | 0.616452 | 0.482409 | 0.615785 |
| PLEKHG1 | 0.720739 | 1.665719 | 0.096293 | 0.185028 | 0.096979 | 0.186574 |
| PLEKHH1 | -0.07914 | -0.0956  | 0.923872 | 0.954467 | 0.92367  | 0.954236 |
| PLEKHM1 | -0.6083  | -0.98506 | 0.324993 | 0.465833 | 0.324396 | 0.465404 |
| PLK1    | -1.31065 | -2.9235  | 0.003592 | 0.013715 | 0.003646 | 0.013896 |
| PLK3    | 3.417882 | 12.37505 | 1.77E-31 | 8.33E-28 | 6.66E-31 | 3.13E-27 |
| PLK4    | -0.48657 | -0.67378 | 0.50071  | 0.631182 | 0.499814 | 0.630468 |
| PLN     | 2.904236 | 6.723698 | 4.14E-11 | 2.53E-09 | 4.50E-11 | 2.73E-09 |
| PLOD1   | -0.12489 | -0.37743 | 0.705986 | 0.802451 | 0.707842 | 0.803749 |
| PLOD2   | 0.552206 | 1.210334 | 0.226629 | 0.358397 | 0.227286 | 0.359677 |
| PLOD3   | -1.3798  | -2.49921 | 0.012714 | 0.037478 | 0.012674 | 0.037417 |
| PLP2    | -0.12891 | -0.2432  | 0.807937 | 0.873948 | 0.80792  | 0.873929 |
| PLS3    | 0.114907 | 0.157004 | 0.875294 | 0.922226 | 0.875028 | 0.921908 |
| PLSCR1  | 2.305734 | 3.28374  | 0.001084 | 0.005065 | 0.00106  | 0.004976 |
| PLSCR3  | 1.278722 | 3.055891 | 0.002344 | 0.009689 | 0.002403 | 0.009898 |
| PLTP    | 2.925167 | 5.689508 | 2.00E-08 | 4.69E-07 | 2.00E-08 | 4.72E-07 |
| PLXNA3  | -1.02343 | -1.65709 | 0.098025 | 0.187972 | 0.09761  | 0.187404 |
| PLXNB1  | 1.621445 | 2.566845 | 0.010505 | 0.032312 | 0.010398 | 0.032088 |
| PLXNB3  | 0.443639 | 0.576943 | 0.564195 | 0.687329 | 0.563272 | 0.686739 |

|         |          |          |          |          |          |          |
|---------|----------|----------|----------|----------|----------|----------|
| PLXNC1  | -0.85186 | -1.3477  | 0.178264 | 0.297952 | 0.177665 | 0.297057 |
| PML     | 0.957593 | 1.459545 | 0.14494  | 0.254566 | 0.144297 | 0.254007 |
| PMP22   | 0.500315 | 0.78284  | 0.434031 | 0.570135 | 0.433367 | 0.569568 |
| PMPCB   | 1.978462 | 4.261803 | 2.36E-05 | 0.000207 | 2.41E-05 | 0.000211 |
| PMS1    | -0.09271 | -0.2459  | 0.805844 | 0.872286 | 0.806626 | 0.872931 |
| PMVK    | 0.155298 | 0.362104 | 0.717402 | 0.810916 | 0.717993 | 0.81132  |
| PNOC    | 2.625827 | 3.449756 | 0.000601 | 0.003123 | 0.000583 | 0.003039 |
| PNPLA2  | 0.433098 | 0.733869 | 0.463316 | 0.599556 | 0.462901 | 0.599018 |
| PNRC1   | 0.239061 | 0.247277 | 0.804778 | 0.871534 | 0.80418  | 0.870886 |
| PODXL   | -0.97342 | -1.54005 | 0.124076 | 0.226381 | 0.123557 | 0.225521 |
| POLA2   | 1.349375 | 2.929536 | 0.003524 | 0.013521 | 0.003566 | 0.013638 |
| POLB    | 3.423063 | 5.570185 | 3.85E-08 | 8.34E-07 | 3.70E-08 | 8.12E-07 |
| POLD1   | -0.68665 | -1.25158 | 0.211211 | 0.337724 | 0.211036 | 0.33737  |
| POLD3   | -0.1583  | -0.33146 | 0.740411 | 0.827964 | 0.740639 | 0.827825 |
| POLD4   | -2.35033 | -2.26425 | 0.023916 | 0.06183  | 0.023455 | 0.060871 |
| POLE    | -1.45699 | -1.93765 | 0.053137 | 0.118081 | 0.052596 | 0.117158 |
| POLG2   | -0.65526 | -1.6869  | 0.092143 | 0.179477 | 0.093321 | 0.181093 |
| POLI    | 1.133055 | 1.874467 | 0.061353 | 0.131812 | 0.061068 | 0.131474 |
| POLK    | 1.798636 | 4.708685 | 3.10E-06 | 3.78E-05 | 3.38E-06 | 4.04E-05 |
| POLL    | -1.39892 | -1.96362 | 0.050037 | 0.112361 | 0.049572 | 0.111477 |
| POLM    | -0.16047 | -0.16518 | 0.868854 | 0.91746  | 0.868446 | 0.917235 |
| POLR1A  | 0.836861 | 0.921213 | 0.357311 | 0.497535 | 0.35589  | 0.496127 |
| POLR1C  | 1.370695 | 2.435084 | 0.01518  | 0.043134 | 0.015119 | 0.043013 |
| POLR2A  | -0.55456 | -0.77803 | 0.436858 | 0.572489 | 0.435928 | 0.57135  |
| POLR2B  | -0.24061 | -0.63462 | 0.52592  | 0.654615 | 0.527582 | 0.656335 |
| POLR2D  | -0.08684 | -0.09517 | 0.924209 | 0.954467 | 0.923984 | 0.954236 |
| POLR2F  | -0.18556 | -0.4795  | 0.631757 | 0.743802 | 0.633011 | 0.74435  |
| POLR2G  | 1.291444 | 3.914095 | 0.000101 | 0.000692 | 0.000112 | 0.000753 |
| POLR2H  | -0.2826  | -0.91744 | 0.359284 | 0.499301 | 0.363277 | 0.502324 |
| POLR2I  | -0.78293 | -1.33349 | 0.182878 | 0.303292 | 0.182486 | 0.302908 |
| POLR2J  | -1.1481  | -1.51632 | 0.129966 | 0.234307 | 0.129082 | 0.23334  |
| POLR2K  | -0.09427 | -0.27303 | 0.784922 | 0.858232 | 0.786124 | 0.858453 |
| POLR2L  | 0.193602 | 0.200496 | 0.841161 | 0.897555 | 0.840671 | 0.897394 |
| POLR3A  | 1.839706 | 2.971206 | 0.003085 | 0.012054 | 0.003048 | 0.011988 |
| POLR3C  | 3.862051 | 7.638203 | 8.78E-14 | 1.06E-11 | 8.84E-14 | 1.12E-11 |
| POLR3D  | -0.44334 | -0.78857 | 0.430678 | 0.567317 | 0.430414 | 0.56681  |
| POMZP3  | 1.827372 | 2.693783 | 0.007263 | 0.024279 | 0.007159 | 0.023965 |
| PON2    | 3.169103 | 3.8955   | 0.000109 | 0.000739 | 0.000105 | 0.000712 |
| POSTN   | 5.151704 | 7.61641  | 1.02E-13 | 1.20E-11 | 9.21E-14 | 1.14E-11 |
| POU2AF1 | 2.326015 | 3.28712  | 0.001071 | 0.005021 | 0.001047 | 0.00493  |
| POU2F1  | -0.66197 | -0.86445 | 0.387686 | 0.527083 | 0.386571 | 0.52574  |



|          |          |          |          |          |          |          |
|----------|----------|----------|----------|----------|----------|----------|
| POU2F2   | 3.544153 | 6.221712 | 9.25E-10 | 3.24E-08 | 8.97E-10 | 3.17E-08 |
| POU4F1   | -3.0344  | -2.77364 | 0.005716 | 0.019975 | 0.005553 | 0.019476 |
| POU6F2   | -3.51674 | -4.17174 | 3.47E-05 | 0.000286 | 3.30E-05 | 0.000274 |
| PPA2     | -0.59991 | -1.00981 | 0.312993 | 0.455438 | 0.31252  | 0.454892 |
| PPARA    | 0.619905 | 0.708778 | 0.478739 | 0.612765 | 0.477491 | 0.611617 |
| PPARG    | -0.96588 | -1.30314 | 0.193029 | 0.314706 | 0.192045 | 0.313734 |
| PPAT     | -1.83499 | -2.29229 | 0.022235 | 0.058294 | 0.021898 | 0.057854 |
| PPFIA1   | 0.760075 | 0.956507 | 0.339203 | 0.480486 | 0.337996 | 0.479354 |
| PPFIBP1  | -1.67194 | -3.41386 | 0.000684 | 0.003478 | 0.000689 | 0.003501 |
| PPFIBP2  | -1.60733 | -3.24085 | 0.001258 | 0.005731 | 0.001265 | 0.00576  |
| PPIB     | 1.115311 | 2.869176 | 0.004261 | 0.015621 | 0.004399 | 0.016078 |
| PPIC     | 1.358326 | 3.063701 | 0.002285 | 0.009469 | 0.002325 | 0.009626 |
| PPIE     | -1.76545 | -3.49175 | 0.000515 | 0.00273  | 0.000517 | 0.002734 |
| PPIG     | 2.043104 | 4.910972 | 1.17E-06 | 1.69E-05 | 1.24E-06 | 1.78E-05 |
| PPIH     | 0.977639 | 1.948083 | 0.051872 | 0.116096 | 0.051965 | 0.116378 |
| PPIL2    | -0.17154 | -0.22953 | 0.818536 | 0.882244 | 0.818135 | 0.882192 |
| PPIL4    | 0.392006 | 0.941353 | 0.346904 | 0.487505 | 0.348148 | 0.48801  |
| PPL      | 3.436219 | 6.633414 | 7.35E-11 | 3.97E-09 | 7.34E-11 | 3.92E-09 |
| PPM1A    | -2.52319 | -3.63474 | 0.000302 | 0.001773 | 0.000294 | 0.001744 |
| PPM1B    | -0.05075 | -0.11375 | 0.909477 | 0.945486 | 0.909629 | 0.945435 |
| PPM1F    | -0.59706 | -1.90871 | 0.056778 | 0.12481  | 0.058755 | 0.127669 |
| PPOX     | 1.587219 | 1.858955 | 0.063525 | 0.13522  | 0.062796 | 0.134155 |
| PPP1CA   | -2.78717 | -4.38514 | 1.37E-05 | 0.000131 | 1.33E-05 | 0.000128 |
| PPP1CB   | 1.900318 | 3.463627 | 0.000571 | 0.002992 | 0.000568 | 0.002976 |
| PPP1CC   | -0.128   | -0.27034 | 0.786991 | 0.8592   | 0.7872   | 0.859373 |
| PPP1R10  | 0.003713 | 0.004515 | 0.996399 | 0.997004 | 0.99639  | 0.997026 |
| PPP1R12B | -0.75376 | -1.17131 | 0.241942 | 0.376159 | 0.241242 | 0.375195 |
| PPP1R13L | 1.615041 | 3.394287 | 0.000734 | 0.003682 | 0.000742 | 0.003717 |
| PPP1R15A | -1.72923 | -4.69328 | 3.34E-06 | 4.00E-05 | 3.68E-06 | 4.36E-05 |
| PPP1R16B | -1.16636 | -2.06674 | 0.039188 | 0.092416 | 0.039068 | 0.092085 |
| PPP1R1A  | -1.12519 | -1.64411 | 0.100678 | 0.192119 | 0.100056 | 0.191164 |
| PPP1R2   | -2.70556 | -3.9357  | 9.27E-05 | 0.000647 | 8.99E-05 | 0.000633 |
| PPP1R3F  | -1.07878 | -1.32389 | 0.186045 | 0.307134 | 0.184904 | 0.305787 |
| PPP1R7   | 0.258787 | 0.316656 | 0.751615 | 0.833941 | 0.750989 | 0.833419 |
| PPP1R8   | -1.35389 | -1.62382 | 0.104941 | 0.1988   | 0.104012 | 0.197358 |
| PPP2CA   | 0.387455 | 0.656855 | 0.511527 | 0.640943 | 0.511136 | 0.640453 |
| PPP2CB   | -0.86494 | -2.57728 | 0.010197 | 0.031529 | 0.010679 | 0.032678 |
| PPP2R1A  | 0.381425 | 0.557523 | 0.577379 | 0.697783 | 0.576684 | 0.697123 |
| PPP2R1B  | 2.99886  | 3.977857 | 7.81E-05 | 0.000562 | 7.51E-05 | 0.000544 |
| PPP2R2A  | -0.75909 | -2.33943 | 0.019641 | 0.053024 | 0.020515 | 0.055052 |
| PPP2R2B  | 0.687574 | 0.916068 | 0.360001 | 0.500001 | 0.358912 | 0.499079 |

|          |          |          |          |          |          |          |
|----------|----------|----------|----------|----------|----------|----------|
| PPP2R2D  | -0.38397 | -0.54901 | 0.5832   | 0.703192 | 0.582471 | 0.702312 |
| PPP2R4   | -0.45614 | -0.87888 | 0.379817 | 0.518906 | 0.379862 | 0.518846 |
| PPP2R5A  | 2.388332 | 2.394104 | 0.016968 | 0.047386 | 0.016617 | 0.046515 |
| PPP2R5B  | 1.738145 | 2.439295 | 0.015006 | 0.042847 | 0.014801 | 0.042366 |
| PPP2R5C  | 0.555585 | 1.007277 | 0.314209 | 0.45636  | 0.314003 | 0.456203 |
| PPP2R5E  | 1.605262 | 2.052666 | 0.04054  | 0.0947   | 0.040052 | 0.093934 |
| PPP3CA   | 2.434838 | 4.197232 | 3.11E-05 | 0.000261 | 3.06E-05 | 0.000258 |
| PPP3CB   | -0.61266 | -0.90566 | 0.365479 | 0.504776 | 0.364633 | 0.503755 |
| PPP3CC   | 0.268961 | 0.42409  | 0.671652 | 0.776763 | 0.67122  | 0.776186 |
| PPP3R1   | 1.493691 | 2.637805 | 0.008562 | 0.027648 | 0.008519 | 0.027518 |
| PPP6C    | -0.55223 | -1.90816 | 0.056849 | 0.12481  | 0.059347 | 0.128507 |
| PPY      | 0.397134 | 0.472562 | 0.636698 | 0.747186 | 0.635786 | 0.746302 |
| PQBP1    | -0.19103 | -0.45596 | 0.648585 | 0.75773  | 0.649403 | 0.758121 |
| PRAF2    | 1.868756 | 3.472527 | 0.000553 | 0.00291  | 0.000551 | 0.002897 |
| PRC1     | 0.113343 | 0.150657 | 0.880297 | 0.92535  | 0.880027 | 0.925101 |
| PRCC     | 0.504646 | 0.941247 | 0.346958 | 0.487505 | 0.346866 | 0.487712 |
| PRCP     | -0.28969 | -0.836   | 0.403492 | 0.541059 | 0.406154 | 0.543853 |
| PRDM16   | 2.105305 | 2.584563 | 0.009986 | 0.031    | 0.009794 | 0.030586 |
| PRDM2    | -0.51655 | -1.00062 | 0.317416 | 0.45974  | 0.317484 | 0.459436 |
| PRDX1    | -0.5548  | -1.67808 | 0.093853 | 0.181724 | 0.096045 | 0.185005 |
| PRDX2    | -0.9138  | -1.56754 | 0.117517 | 0.217178 | 0.117206 | 0.216707 |
| PRDX3    | 0.987294 | 1.67016  | 0.095411 | 0.183934 | 0.095097 | 0.183631 |
| PRDX4    | -0.7301  | -1.63761 | 0.102029 | 0.194222 | 0.102606 | 0.195321 |
| PRDX5    | 4.437779 | 10.50256 | 8.54E-24 | 6.69E-21 | 1.03E-23 | 8.07E-21 |
| PRDX6    | -0.58998 | -0.98753 | 0.32378  | 0.464946 | 0.323289 | 0.464401 |
| PRELP    | 0.559904 | 0.561334 | 0.57478  | 0.696417 | 0.573553 | 0.695126 |
| PREX1    | 0.869292 | 1.425889 | 0.154422 | 0.266931 | 0.153947 | 0.266207 |
| PRF1     | 1.29706  | 1.796371 | 0.07294  | 0.15003  | 0.072341 | 0.149124 |
| PRIC285  | 1.503187 | 1.837166 | 0.066681 | 0.140015 | 0.065972 | 0.138825 |
| PRICKLE1 | -0.56617 | -1.31761 | 0.18814  | 0.309506 | 0.189091 | 0.310527 |
| PRIM1    | -1.53608 | -1.55167 | 0.12127  | 0.222573 | 0.120086 | 0.220729 |
| PRKAA1   | 0.124334 | 0.241708 | 0.809089 | 0.874993 | 0.809122 | 0.875028 |
| PRKAB2   | 2.567283 | 4.872362 | 1.41E-06 | 1.99E-05 | 1.41E-06 | 1.98E-05 |
| PRKACB   | -0.26728 | -0.30385 | 0.761348 | 0.841368 | 0.760687 | 0.840637 |
| PRKAG1   | 0.213841 | 0.394945 | 0.693024 | 0.79415  | 0.692945 | 0.793771 |
| PRKAG2   | 1.222364 | 2.392704 | 0.017032 | 0.047537 | 0.017056 | 0.047463 |
| PRKAR1A  | -1.27456 | -2.61413 | 0.009171 | 0.029063 | 0.009217 | 0.029114 |
| PRKAR1B  | 3.314393 | 4.762161 | 2.41E-06 | 3.04E-05 | 2.30E-06 | 2.95E-05 |
| PRKAR2B  | -0.11708 | -0.29613 | 0.767237 | 0.846482 | 0.767992 | 0.846724 |
| PRKCA    | -0.50287 | -0.66712 | 0.504953 | 0.634227 | 0.503979 | 0.63338  |
| PRKCD    | 2.79719  | 5.588633 | 3.48E-08 | 7.57E-07 | 3.52E-08 | 7.76E-07 |

|         |          |          |          |          |          |          |
|---------|----------|----------|----------|----------|----------|----------|
| PRKCH   | 1.487759 | 1.566492 | 0.117762 | 0.217393 | 0.116634 | 0.215903 |
| PRKCI   | 0.216642 | 0.425004 | 0.670987 | 0.77648  | 0.671067 | 0.776186 |
| PRKCQ   | -0.60146 | -0.80375 | 0.421862 | 0.559246 | 0.420816 | 0.558395 |
| PRKD1   | 2.996588 | 4.828565 | 1.75E-06 | 2.34E-05 | 1.69E-06 | 2.30E-05 |
| PRKD3   | 3.01435  | 11.02295 | 7.53E-26 | 8.84E-23 | 2.35E-25 | 2.76E-22 |
| PRKDC   | -2.44384 | -4.77624 | 2.25E-06 | 2.87E-05 | 2.26E-06 | 2.92E-05 |
| PRKG2   | 2.030504 | 3.662221 | 0.000272 | 0.001632 | 0.00027  | 0.001626 |
| PRKRIP1 | 0.296235 | 0.669046 | 0.503725 | 0.633421 | 0.504483 | 0.633637 |
| PRKRIR  | -0.46218 | -0.48566 | 0.627384 | 0.740509 | 0.626321 | 0.739812 |
| PRLR    | 0.645267 | 0.854761 | 0.393026 | 0.532034 | 0.391942 | 0.530719 |
| PRND    | -0.26899 | -0.32271 | 0.747026 | 0.832206 | 0.746372 | 0.832212 |
| PROC    | -4.69933 | -4.67651 | 3.61E-06 | 4.27E-05 | 3.36E-06 | 4.03E-05 |
| PROCR   | -1.24525 | -2.64794 | 0.008312 | 0.026961 | 0.00838  | 0.027219 |
| PRODH2  | -0.50623 | -0.94056 | 0.347308 | 0.487851 | 0.3472   | 0.487712 |
| PROM1   | 1.402435 | 1.447255 | 0.14835  | 0.259006 | 0.14708  | 0.257555 |
| PROSC   | 1.870571 | 1.907735 | 0.056904 | 0.12481  | 0.056122 | 0.123606 |
| PRPF18  | 1.671835 | 4.220668 | 2.81E-05 | 0.00024  | 2.99E-05 | 0.000252 |
| PRPF3   | -1.17537 | -2.04347 | 0.041443 | 0.096094 | 0.04129  | 0.095975 |
| PRPF31  | 1.866191 | 2.419289 | 0.015848 | 0.044683 | 0.015599 | 0.044113 |
| PRPF4   | 0.852314 | 1.106605 | 0.26891  | 0.40733  | 0.267773 | 0.406371 |
| PRPF4B  | -0.32486 | -0.82609 | 0.40908  | 0.547303 | 0.410684 | 0.548609 |
| PRPF8   | -0.93512 | -1.65071 | 0.099323 | 0.19015  | 0.099108 | 0.189737 |
| PRPH    | -0.62758 | -0.96376 | 0.335556 | 0.477046 | 0.334805 | 0.475834 |
| PRPS1   | 2.146122 | 3.469889 | 0.000558 | 0.002934 | 0.000549 | 0.00289  |
| PRPS2   | 1.66742  | 3.520335 | 0.000464 | 0.002514 | 0.00047  | 0.002539 |
| PRPSAP1 | -2.72985 | -2.91052 | 0.003743 | 0.014164 | 0.003638 | 0.013887 |
| PRPSAP2 | 1.231779 | 3.037874 | 0.002486 | 0.010171 | 0.00256  | 0.010371 |
| PRR3    | -0.39729 | -1.66749 | 0.09594  | 0.184651 | 0.101557 | 0.193559 |
| PRRG1   | 1.833171 | 1.87216  | 0.061672 | 0.132356 | 0.060853 | 0.131174 |
| PRRG2   | 1.26177  | 2.876146 | 0.004169 | 0.015352 | 0.004239 | 0.015591 |
| PRRX1   | -1.47509 | -2.68824 | 0.007383 | 0.024541 | 0.007359 | 0.024513 |
| PRSS16  | -0.09942 | -0.20047 | 0.841181 | 0.897555 | 0.841263 | 0.897514 |
| PRSS21  | -0.8459  | -1.13678 | 0.256086 | 0.393593 | 0.255027 | 0.392356 |
| PRSS23  | -0.75058 | -1.44462 | 0.149088 | 0.260005 | 0.14912  | 0.259964 |
| PRSS8   | 0.610388 | 1.257334 | 0.209124 | 0.33534  | 0.209458 | 0.33599  |
| PRTFDC1 | -0.52386 | -0.90004 | 0.36846  | 0.507386 | 0.368061 | 0.506912 |
| PSAP    | -1.53987 | -4.21156 | 2.93E-05 | 0.000248 | 3.18E-05 | 0.000265 |
| PSCA    | 3.929398 | 3.855622 | 0.000128 | 0.000841 | 0.000122 | 0.000809 |
| PSD     | 2.74564  | 4.187599 | 3.24E-05 | 0.00027  | 3.15E-05 | 0.000263 |
| PSD4    | 3.337396 | 8.301092 | 6.89E-16 | 1.16E-13 | 8.23E-16 | 1.38E-13 |
| PSEN1   | 1.781727 | 5.159537 | 3.37E-07 | 5.62E-06 | 3.91E-07 | 6.47E-06 |

|          |          |          |          |          |          |          |
|----------|----------|----------|----------|----------|----------|----------|
| PSEN2    | -1.0513  | -1.73941 | 0.082477 | 0.164884 | 0.082141 | 0.164211 |
| PSIP1    | -1.76204 | -4.66879 | 3.74E-06 | 4.41E-05 | 4.09E-06 | 4.72E-05 |
| PSMA1    | -1.36693 | -2.26773 | 0.023702 | 0.061444 | 0.02355  | 0.061051 |
| PSMA2    | -0.08884 | -0.20201 | 0.83998  | 0.897455 | 0.840274 | 0.897394 |
| PSMA3    | 0.418548 | 0.988935 | 0.323095 | 0.464387 | 0.324235 | 0.465315 |
| PSMA5    | -0.63014 | -1.19407 | 0.232923 | 0.366255 | 0.232896 | 0.366655 |
| PSMA6    | -0.6345  | -1.47989 | 0.13943  | 0.247012 | 0.140293 | 0.248447 |
| PSMB1    | -0.00904 | -0.03306 | 0.973637 | 0.98254  | 0.973943 | 0.982725 |
| PSMB10   | -1.48086 | -4.42829 | 1.13E-05 | 0.000112 | 1.28E-05 | 0.000124 |
| PSMB2    | -0.74445 | -2.32449 | 0.020433 | 0.054722 | 0.021371 | 0.056811 |
| PSMB3    | -0.47885 | -1.40734 | 0.159847 | 0.273495 | 0.162372 | 0.277105 |
| PSMB5    | 1.52594  | 1.930798 | 0.05398  | 0.119617 | 0.053386 | 0.11858  |
| PSMB7    | -0.29336 | -0.53407 | 0.593493 | 0.712301 | 0.593349 | 0.711965 |
| PSMB8    | -0.86404 | -1.97141 | 0.049138 | 0.110766 | 0.049566 | 0.111477 |
| PSMB9    | 0.499437 | 0.839768 | 0.401374 | 0.539417 | 0.400911 | 0.538557 |
| PSMC2    | 2.43262  | 3.633943 | 0.000303 | 0.001773 | 0.000296 | 0.001751 |
| PSMC3    | -2.55168 | -7.85556 | 1.85E-14 | 2.56E-12 | 2.73E-14 | 3.77E-12 |
| PSMC4    | 0.432251 | 0.941308 | 0.346927 | 0.487505 | 0.347574 | 0.48781  |
| PSMC5    | 0.584664 | 1.763676 | 0.078297 | 0.158619 | 0.08027  | 0.161848 |
| PSMC6    | 1.505729 | 2.180736 | 0.029592 | 0.073351 | 0.029287 | 0.072753 |
| PSMD1    | 1.705739 | 5.616555 | 2.99E-08 | 6.62E-07 | 3.88E-08 | 8.45E-07 |
| PSMD12   | 1.979284 | 3.203521 | 0.00143  | 0.006407 | 0.00141  | 0.006336 |
| PSMD13   | 0.437634 | 1.974087 | 0.048832 | 0.110235 | 0.053437 | 0.118638 |
| PSMD14   | -1.15    | -2.05749 | 0.040072 | 0.093818 | 0.039965 | 0.093823 |
| PSMD5    | -0.58414 | -0.90039 | 0.368276 | 0.507297 | 0.367541 | 0.506434 |
| PSMD8    | 0.116268 | 0.322668 | 0.74706  | 0.832206 | 0.748259 | 0.83258  |
| PSME1    | -1.96609 | -4.85583 | 1.53E-06 | 2.09E-05 | 1.64E-06 | 2.24E-05 |
| PSME2    | -0.2868  | -0.72962 | 0.465908 | 0.602247 | 0.467439 | 0.603561 |
| PSME3    | -1.07973 | -1.67971 | 0.093536 | 0.181433 | 0.09305  | 0.180717 |
| PSMF1    | 0.441404 | 0.624079 | 0.532814 | 0.660223 | 0.531997 | 0.659559 |
| PSORS1C2 | -0.96947 | -1.13617 | 0.256342 | 0.393856 | 0.255031 | 0.392356 |
| PSPH     | 2.269574 | 2.622138 | 0.008961 | 0.028533 | 0.008769 | 0.028062 |
| PTBP1    | 1.456628 | 6.497002 | 1.73E-10 | 7.88E-09 | 3.70E-10 | 1.45E-08 |
| PTDSS1   | 0.386325 | 0.575079 | 0.565454 | 0.688113 | 0.564782 | 0.687867 |
| PTDSS2   | 1.289144 | 2.304388 | 0.021543 | 0.057075 | 0.021471 | 0.057014 |
| PTEN     | -0.25279 | -0.42131 | 0.673678 | 0.77834  | 0.673358 | 0.77797  |
| PTER     | -1.54015 | -1.89593 | 0.058451 | 0.127127 | 0.057802 | 0.12613  |
| PTGER2   | -1.54209 | -1.82673 | 0.068239 | 0.142255 | 0.06749  | 0.14122  |
| PTGER3   | 2.129023 | 5.342116 | 1.31E-07 | 2.45E-06 | 1.43E-07 | 2.64E-06 |
| PTGER4   | 1.124143 | 1.835617 | 0.066911 | 0.140268 | 0.066587 | 0.139777 |
| PTGES    | 2.568698 | 3.15734  | 0.001672 | 0.007278 | 0.001626 | 0.007096 |

|         |          |          |          |          |          |          |
|---------|----------|----------|----------|----------|----------|----------|
| PTGIR   | 0.419303 | 0.423197 | 0.672304 | 0.777325 | 0.671318 | 0.776186 |
| PTGIS   | -0.15695 | -0.19896 | 0.842362 | 0.898057 | 0.841978 | 0.897704 |
| PTGS2   | 1.246707 | 1.533877 | 0.125589 | 0.228167 | 0.124612 | 0.226656 |
| PTHLH   | 1.525588 | 2.546773 | 0.011122 | 0.03378  | 0.011037 | 0.033512 |
| PTK2    | 0.920272 | 2.43872  | 0.015029 | 0.042889 | 0.015443 | 0.04383  |
| PTK2B   | -1.10802 | -2.64473 | 0.00839  | 0.02714  | 0.008552 | 0.027575 |
| PTK6    | 0.379822 | 0.699482 | 0.484523 | 0.61731  | 0.484394 | 0.616811 |
| PTMS    | 0.101987 | 0.267414 | 0.789243 | 0.861259 | 0.790049 | 0.862138 |
| PTP4A1  | -0.2419  | -0.63493 | 0.525718 | 0.654537 | 0.527347 | 0.656216 |
| PTPLB   | 0.622681 | 2.291096 | 0.022305 | 0.058402 | 0.023928 | 0.061827 |
| PTPN1   | -2.5048  | -3.51893 | 0.000466 | 0.002524 | 0.000454 | 0.002469 |
| PTPN11  | 0.582195 | 1.105995 | 0.269173 | 0.407454 | 0.269157 | 0.40755  |
| PTPN12  | -0.06618 | -0.08815 | 0.929783 | 0.957909 | 0.929625 | 0.957746 |
| PTPN13  | 0.642777 | 1.206566 | 0.228077 | 0.360214 | 0.228012 | 0.360463 |
| PTPN14  | 1.389255 | 1.61006  | 0.107912 | 0.203038 | 0.10693  | 0.201593 |
| PTPN18  | 0.562704 | 1.867709 | 0.062292 | 0.133259 | 0.064634 | 0.136777 |
| PTPN2   | 0.94428  | 2.51024  | 0.012328 | 0.036625 | 0.01269  | 0.037441 |
| PTPN21  | -1.02349 | -1.77471 | 0.076455 | 0.155693 | 0.076228 | 0.1555   |
| PTPN22  | -0.27387 | -0.60538 | 0.545158 | 0.67092  | 0.545768 | 0.671319 |
| PTPN23  | 3.281248 | 5.15528  | 3.45E-07 | 5.71E-06 | 3.31E-07 | 5.54E-06 |
| PTPN3   | 0.456901 | 1.042669 | 0.297523 | 0.439321 | 0.298443 | 0.440402 |
| PTPN4   | 2.230362 | 5.154371 | 3.46E-07 | 5.71E-06 | 3.65E-07 | 6.08E-06 |
| PTPN7   | -2.57566 | -2.81493 | 0.005039 | 0.018026 | 0.00491  | 0.01763  |
| PTPN9   | 0.204506 | 0.528346 | 0.597455 | 0.715606 | 0.598802 | 0.716583 |
| PTPRB   | 2.603114 | 2.867195 | 0.004287 | 0.015705 | 0.004174 | 0.015387 |
| PTPRC   | -0.16221 | -0.28822 | 0.773275 | 0.849952 | 0.773148 | 0.84963  |
| PTPRE   | 0.593798 | 0.93636  | 0.349466 | 0.489273 | 0.348792 | 0.48848  |
| PTPRF   | 1.614542 | 3.249358 | 0.001222 | 0.005616 | 0.001228 | 0.005614 |
| PTPRM   | 0.009658 | 0.012415 | 0.990098 | 0.993056 | 0.990074 | 0.993032 |
| PTPRN2  | 0.378523 | 0.861743 | 0.389175 | 0.527885 | 0.390064 | 0.528938 |
| PTPRO   | 3.070475 | 4.225314 | 2.76E-05 | 0.000236 | 2.65E-05 | 0.000228 |
| PTPRR   | -1.51904 | -1.80202 | 0.072045 | 0.14871  | 0.071274 | 0.147376 |
| PTPRS   | -0.7768  | -1.91387 | 0.056113 | 0.123644 | 0.056837 | 0.124653 |
| PTPRT   | -1.49607 | -1.7797  | 0.075634 | 0.154421 | 0.074844 | 0.153141 |
| PTPRU   | 0.134721 | 0.272127 | 0.785619 | 0.858377 | 0.785732 | 0.858424 |
| PTPRZ1  | -0.79811 | -1.4473  | 0.148338 | 0.259006 | 0.148165 | 0.258735 |
| PTRF    | -2.82168 | -7.13028 | 2.90E-12 | 2.62E-10 | 3.37E-12 | 3.09E-10 |
| PTS     | -1.86258 | -3.34145 | 0.000885 | 0.004285 | 0.00088  | 0.004276 |
| PTTG1   | 1.194324 | 1.761552 | 0.078656 | 0.15914  | 0.078124 | 0.158405 |
| PTTG1IP | -1.10692 | -2.82254 | 0.004923 | 0.017703 | 0.005072 | 0.018114 |
| PTX3    | -1.25497 | -2.13673 | 0.033025 | 0.08059  | 0.032866 | 0.080203 |

|           |          |          |          |          |          |          |
|-----------|----------|----------|----------|----------|----------|----------|
| PUM2      | -2.41749 | -2.73715 | 0.006382 | 0.021782 | 0.006231 | 0.021362 |
| PURA      | 0.629578 | 0.667891 | 0.504461 | 0.633948 | 0.503156 | 0.632986 |
| PURB      | -0.14399 | -0.17698 | 0.859585 | 0.912181 | 0.859225 | 0.911799 |
| PVRL1     | 0.427448 | 0.562637 | 0.573893 | 0.69586  | 0.573005 | 0.694911 |
| PVRL2     | -0.11254 | -0.15798 | 0.874528 | 0.921794 | 0.874275 | 0.921528 |
| PWP1      | 0.87824  | 1.15562  | 0.248298 | 0.384388 | 0.247201 | 0.383195 |
| PXK       | -0.81949 | -2.08858 | 0.037168 | 0.088373 | 0.037824 | 0.089603 |
| PXMP2     | 3.30825  | 4.704786 | 3.16E-06 | 3.83E-05 | 3.02E-06 | 3.69E-05 |
| PXMP4     | 0.80212  | 1.896504 | 0.058375 | 0.12702  | 0.058969 | 0.128016 |
| PYGB      | 1.101885 | 1.929213 | 0.054177 | 0.119997 | 0.054008 | 0.119723 |
| PYGL      | -2.32547 | -4.68827 | 3.42E-06 | 4.08E-05 | 3.45E-06 | 4.11E-05 |
| PYGM      | 3.100681 | 4.492822 | 8.44E-06 | 8.66E-05 | 8.11E-06 | 8.42E-05 |
| QARS      | -1.27768 | -4.9384  | 1.02E-06 | 1.50E-05 | 1.41E-06 | 1.98E-05 |
| QDPR      | 0.506379 | 0.640812 | 0.52189  | 0.650978 | 0.520859 | 0.649691 |
| QPCT      | -0.53297 | -1.00598 | 0.31483  | 0.45698  | 0.314787 | 0.456635 |
| RAB11A    | 1.346292 | 1.807891 | 0.071126 | 0.147006 | 0.070496 | 0.14596  |
| RAB11B    | 0.281844 | 0.77524  | 0.438505 | 0.573927 | 0.440678 | 0.576148 |
| RAB11FIP1 | 2.044216 | 3.803525 | 0.000157 | 0.001007 | 0.000157 | 0.001006 |
| RAB11FIP3 | -0.05457 | -0.14672 | 0.883404 | 0.927407 | 0.883907 | 0.92771  |
| RAB14     | -1.07731 | -3.08127 | 0.002156 | 0.008999 | 0.002279 | 0.009469 |
| RAB18     | 0.831222 | 1.878864 | 0.060749 | 0.131033 | 0.061207 | 0.131658 |
| RAB1A     | -0.33658 | -0.60328 | 0.546552 | 0.672056 | 0.546346 | 0.671854 |
| RAB20     | 0.544873 | 0.888976 | 0.374373 | 0.513588 | 0.373807 | 0.512812 |
| RAB23     | 0.989807 | 1.858295 | 0.063618 | 0.135297 | 0.06358  | 0.135277 |
| RAB26     | -1.07677 | -1.04433 | 0.296754 | 0.438598 | 0.295167 | 0.437078 |
| RAB27A    | 0.572106 | 0.841379 | 0.400472 | 0.538546 | 0.399628 | 0.537872 |
| RAB31     | 1.158233 | 1.314821 | 0.189074 | 0.310584 | 0.18781  | 0.309071 |
| RAB32     | -0.11284 | -0.11589 | 0.907778 | 0.944138 | 0.907489 | 0.944046 |
| RAB33A    | -0.76213 | -0.92823 | 0.353662 | 0.49397  | 0.3524   | 0.492208 |
| RAB36     | 2.660396 | 3.908921 | 0.000103 | 0.000705 | 0.0001   | 0.000692 |
| RAB37     | 0.992613 | 1.257128 | 0.209198 | 0.335345 | 0.208071 | 0.334109 |
| RAB38     | 0.538293 | 0.848541 | 0.396476 | 0.53501  | 0.395815 | 0.534117 |
| RAB3A     | -0.61977 | -1.6728  | 0.09489  | 0.183231 | 0.096349 | 0.185437 |
| RAB40B    | 0.633295 | 0.957723 | 0.338589 | 0.480051 | 0.337796 | 0.479216 |
| RAB4A     | -0.04154 | -0.05011 | 0.960053 | 0.976418 | 0.959947 | 0.976358 |
| RAB4B     | 0.295621 | 0.322195 | 0.747417 | 0.832206 | 0.746689 | 0.832212 |
| RAB5A     | 1.286776 | 2.766252 | 0.005846 | 0.020397 | 0.005903 | 0.020431 |
| RAB5C     | -1.07958 | -2.43143 | 0.015332 | 0.043489 | 0.015508 | 0.043921 |
| RAB6A     | 0.626874 | 1.383977 | 0.166882 | 0.283055 | 0.167517 | 0.283927 |
| RAB7L1    | -1.35124 | -2.81132 | 0.005096 | 0.018157 | 0.005131 | 0.018237 |
| RAB8B     | 0.029576 | 0.048659 | 0.961208 | 0.976705 | 0.961164 | 0.976618 |

|          |          |          |          |          |          |          |
|----------|----------|----------|----------|----------|----------|----------|
| RAB9A    | 1.652021 | 3.103753 | 0.002001 | 0.008435 | 0.001998 | 0.008436 |
| RAB9B    | 0.604402 | 0.622269 | 0.534002 | 0.661173 | 0.532718 | 0.660104 |
| RABEP1   | 0.942007 | 1.352293 | 0.176793 | 0.296231 | 0.175963 | 0.294945 |
| RABGAP1  | 2.675465 | 4.309672 | 1.91E-05 | 0.000174 | 1.86E-05 | 0.000169 |
| RABGGTA  | -0.39489 | -0.60626 | 0.54457  | 0.670372 | 0.543944 | 0.669602 |
| RABGGTB  | 0.107546 | 0.319131 | 0.749738 | 0.833218 | 0.751245 | 0.833419 |
| RABIF    | 0.947244 | 1.622368 | 0.105252 | 0.199228 | 0.104953 | 0.198662 |
| RAD1     | -0.39896 | -0.42202 | 0.673164 | 0.778128 | 0.672219 | 0.777036 |
| RAD17    | -0.047   | -0.08148 | 0.935085 | 0.962317 | 0.935036 | 0.962266 |
| RAD21    | -0.2513  | -0.42839 | 0.668518 | 0.774473 | 0.668242 | 0.774279 |
| RAD23B   | -0.3207  | -0.40494 | 0.685665 | 0.787928 | 0.684925 | 0.787603 |
| RAD50    | -0.31041 | -0.41442 | 0.678714 | 0.782236 | 0.678029 | 0.781638 |
| RAD51    | 0.737425 | 2.046927 | 0.041102 | 0.095633 | 0.0421   | 0.097376 |
| RAD51C   | 0.10368  | 0.170183 | 0.864924 | 0.914337 | 0.864771 | 0.914175 |
| RAD51L1  | 0.084608 | 0.203193 | 0.839053 | 0.897455 | 0.839463 | 0.897394 |
| RAD51L3  | 2.059897 | 2.600237 | 0.009546 | 0.029961 | 0.009368 | 0.02951  |
| RAD54L   | 0.866119 | 2.635122 | 0.008629 | 0.027797 | 0.009085 | 0.028736 |
| RAE1     | -0.03033 | -0.04071 | 0.967541 | 0.979947 | 0.967468 | 0.979949 |
| RAF1     | -0.50027 | -0.58019 | 0.562005 | 0.685549 | 0.560913 | 0.684751 |
| RAGE     | 1.012264 | 1.700438 | 0.089569 | 0.175876 | 0.08925  | 0.175145 |
| RAI14    | 2.092598 | 2.938582 | 0.003424 | 0.013203 | 0.003359 | 0.013005 |
| RALA     | 1.48156  | 3.71872  | 0.000219 | 0.001355 | 0.000229 | 0.001414 |
| RALB     | 4.175515 | 6.515413 | 1.54E-10 | 7.35E-09 | 1.44E-10 | 7.06E-09 |
| RALBP1   | -0.99013 | -1.85769 | 0.063704 | 0.135356 | 0.063664 | 0.135394 |
| RALGDS   | -0.93361 | -1.38948 | 0.165204 | 0.280469 | 0.164473 | 0.279594 |
| RALY     | 0.397356 | 0.851734 | 0.394703 | 0.533382 | 0.395252 | 0.533664 |
| RAMP1    | 1.816795 | 2.201072 | 0.028112 | 0.070258 | 0.027698 | 0.069319 |
| RAMP2    | -0.02413 | -0.0415  | 0.966914 | 0.979947 | 0.966887 | 0.979949 |
| RAN      | 1.531614 | 3.371931 | 0.000795 | 0.003927 | 0.000808 | 0.003995 |
| RANBP1   | -0.75062 | -2.99184 | 0.002887 | 0.011432 | 0.003319 | 0.012873 |
| RANBP3   | -0.77764 | -1.74778 | 0.081016 | 0.163073 | 0.081535 | 0.163417 |
| RANGAP1  | 1.525545 | 6.561751 | 1.15E-10 | 5.71E-09 | 2.35E-10 | 1.04E-08 |
| RAP1A    | 0.116753 | 0.21994  | 0.825993 | 0.886947 | 0.825975 | 0.887124 |
| RAP1GDS1 | 0.068658 | 0.173224 | 0.862534 | 0.913925 | 0.862984 | 0.913541 |
| RAP2A    | -0.29826 | -0.36303 | 0.716708 | 0.810717 | 0.715997 | 0.809912 |
| RAPGEF1  | 2.108932 | 2.265164 | 0.02386  | 0.061723 | 0.023437 | 0.060858 |
| RAPGEF3  | 1.095561 | 2.370171 | 0.018096 | 0.049849 | 0.01824  | 0.050046 |
| RAPGEF4  | 0.205371 | 0.542373 | 0.587764 | 0.706519 | 0.589271 | 0.70815  |
| RARA     | -0.22333 | -0.47799 | 0.632833 | 0.744182 | 0.633223 | 0.74435  |
| RARB     | -1.59046 | -2.81373 | 0.005058 | 0.018065 | 0.00503  | 0.018006 |
| RARG     | -0.69391 | -0.82806 | 0.407969 | 0.546128 | 0.406706 | 0.544437 |

|          |          |          |          |          |          |          |
|----------|----------|----------|----------|----------|----------|----------|
| RARRES1  | 0.799322 | 0.921241 | 0.357296 | 0.497535 | 0.355944 | 0.496127 |
| RARRES2  | -2.44565 | -3.39084 | 0.000743 | 0.003706 | 0.000724 | 0.003642 |
| RARRES3  | -0.66662 | -0.98036 | 0.327303 | 0.468003 | 0.326436 | 0.467371 |
| RARS     | 0.263019 | 1.005263 | 0.315177 | 0.457201 | 0.32154  | 0.463712 |
| RASA1    | 3.060558 | 5.097878 | 4.62E-07 | 7.40E-06 | 4.48E-07 | 7.24E-06 |
| RASAL2   | 0.074799 | 0.13342  | 0.893907 | 0.934259 | 0.893848 | 0.934198 |
| RASD1    | 1.588231 | 2.845723 | 0.004583 | 0.016659 | 0.004561 | 0.016566 |
| RASGEF1C | 0.772544 | 1.1356   | 0.256579 | 0.394082 | 0.255725 | 0.392909 |
| RASGRP1  | -0.12547 | -0.28685 | 0.774323 | 0.850669 | 0.774747 | 0.851171 |
| RASGRP3  | 1.753211 | 2.852392 | 0.004489 | 0.016356 | 0.00444  | 0.016216 |
| RASL11A  | 1.241508 | 1.437204 | 0.151183 | 0.262684 | 0.150041 | 0.260997 |
| RASSF2   | 0.481342 | 1.206546 | 0.228084 | 0.360214 | 0.229574 | 0.362445 |
| RASSF4   | 0.595318 | 1.138737 | 0.255269 | 0.392791 | 0.255281 | 0.392483 |
| RBAK     | 0.806446 | 1.76221  | 0.078545 | 0.158984 | 0.078955 | 0.159676 |
| RBBP4    | -2.24618 | -6.40492 | 3.05E-10 | 1.22E-08 | 3.75E-10 | 1.46E-08 |
| RBBP6    | 0.376853 | 0.706761 | 0.47999  | 0.613819 | 0.479927 | 0.613552 |
| RBBP7    | -0.34071 | -0.86634 | 0.386651 | 0.526284 | 0.388277 | 0.527126 |
| RBBP8    | -0.15177 | -0.25233 | 0.800876 | 0.869618 | 0.80067  | 0.869306 |
| RBL1     | 0.323955 | 0.371548 | 0.710361 | 0.805222 | 0.709579 | 0.804872 |
| RBM14    | -0.00982 | -0.03187 | 0.974586 | 0.982741 | 0.974797 | 0.982953 |
| RBM15    | 0.777282 | 2.059959 | 0.039835 | 0.093464 | 0.040648 | 0.094854 |
| RBM15B   | -0.29486 | -0.40919 | 0.68255  | 0.785818 | 0.681925 | 0.785166 |
| RBM17    | 0.505227 | 0.547135 | 0.58449  | 0.704205 | 0.583361 | 0.702845 |
| RBM3     | -0.23604 | -0.51351 | 0.607782 | 0.724468 | 0.60826  | 0.724772 |
| RBM4     | -0.49572 | -1.10966 | 0.267592 | 0.406359 | 0.268388 | 0.406649 |
| RBM6     | -0.97396 | -1.788   | 0.074282 | 0.152257 | 0.074186 | 0.15206  |
| RBM8A    | -1.39587 | -4.5464  | 6.61E-06 | 7.16E-05 | 7.85E-06 | 8.20E-05 |
| RBM9     | -0.88119 | -3.14381 | 0.00175  | 0.007554 | 0.001962 | 0.008299 |
| RBMS1    | -0.44688 | -0.57551 | 0.56516  | 0.68797  | 0.564223 | 0.687502 |
| RBMS2    | -0.01289 | -0.02112 | 0.98316  | 0.988417 | 0.98314  | 0.988398 |
| RBMX     | -0.72481 | -2.73155 | 0.00649  | 0.022071 | 0.00719  | 0.024019 |
| RBP1     | 3.78306  | 5.453982 | 7.22E-08 | 1.47E-06 | 6.81E-08 | 1.40E-06 |
| RBP4     | -5.84985 | -6.49486 | 1.75E-10 | 7.91E-09 | 1.54E-10 | 7.41E-09 |
| RBP7     | 1.776221 | 2.249958 | 0.024814 | 0.063717 | 0.024458 | 0.062885 |
| RBPMS    | -0.67751 | -1.18281 | 0.237355 | 0.371238 | 0.237019 | 0.371032 |
| RBX1     | -0.46045 | -0.87603 | 0.381363 | 0.519908 | 0.381354 | 0.519827 |
| RCE1     | -1.40048 | -2.07362 | 0.038542 | 0.091166 | 0.0382   | 0.090449 |
| RCL1     | 3.768816 | 4.029053 | 6.32E-05 | 0.000471 | 6.00E-05 | 0.000453 |
| RCN2     | 0.881798 | 2.161058 | 0.031087 | 0.076457 | 0.031569 | 0.077561 |
| RCOR1    | 1.78271  | 2.929792 | 0.003521 | 0.013521 | 0.003483 | 0.013419 |
| RCOR3    | -0.36036 | -0.45531 | 0.649049 | 0.757896 | 0.648236 | 0.757271 |



|         |          |          |          |          |          |          |
|---------|----------|----------|----------|----------|----------|----------|
| RDBP    | 0.0033   | 0.009074 | 0.992763 | 0.99427  | 0.992797 | 0.994278 |
| RDH11   | 0.691643 | 2.146421 | 0.032241 | 0.0788   | 0.033498 | 0.081297 |
| RDH13   | 2.660015 | 3.568979 | 0.000387 | 0.002166 | 0.000376 | 0.002129 |
| RDH14   | -0.75975 | -2.50689 | 0.012444 | 0.036877 | 0.013223 | 0.038745 |
| RDH5    | 1.410787 | 2.89617  | 0.003916 | 0.014594 | 0.00394  | 0.014754 |
| RECK    | 0.717547 | 1.26261  | 0.207221 | 0.332971 | 0.206922 | 0.332377 |
| RECQL4  | 0.886385 | 1.184243 | 0.236787 | 0.37096  | 0.235731 | 0.369681 |
| RECQL5  | 0.607664 | 1.01216  | 0.311871 | 0.454228 | 0.311364 | 0.453707 |
| REG1A   | -4.2877  | -3.51571 | 0.000472 | 0.002549 | 0.00045  | 0.002453 |
| REG1B   | -8.73676 | -6.95377 | 9.35E-12 | 7.09E-10 | 7.84E-12 | 6.25E-10 |
| REL     | 1.515153 | 2.510697 | 0.012312 | 0.036601 | 0.012217 | 0.03635  |
| RELA    | 0.798619 | 0.986963 | 0.32406  | 0.465134 | 0.322817 | 0.464205 |
| RELB    | 0.88283  | 1.044951 | 0.296468 | 0.438356 | 0.295153 | 0.437078 |
| REPIN1  | -0.60916 | -0.92108 | 0.357378 | 0.497535 | 0.356588 | 0.496877 |
| REPS2   | 1.067177 | 1.899727 | 0.05795  | 0.126504 | 0.057805 | 0.12613  |
| RER1    | -0.56736 | -1.603   | 0.109463 | 0.205025 | 0.111328 | 0.207883 |
| RERE    | 0.183261 | 0.255374 | 0.798522 | 0.867959 | 0.798116 | 0.867718 |
| RERG    | 0.826479 | 1.12014  | 0.263104 | 0.401567 | 0.262058 | 0.400521 |
| RET     | 0.591426 | 0.839607 | 0.401464 | 0.539417 | 0.400535 | 0.538557 |
| REV3L   | 2.021987 | 3.393918 | 0.000735 | 0.003682 | 0.000725 | 0.003646 |
| RFC1    | -2.23308 | -4.61491 | 4.81E-06 | 5.44E-05 | 4.89E-06 | 5.52E-05 |
| RFC3    | -0.39389 | -0.52096 | 0.602588 | 0.720286 | 0.601755 | 0.719473 |
| RFC4    | 2.260625 | 3.708047 | 0.000228 | 0.001406 | 0.000224 | 0.001391 |
| RFFL    | -2.16752 | -2.10724 | 0.035513 | 0.084985 | 0.034912 | 0.083671 |
| RFPL3S  | 1.640152 | 2.459657 | 0.014189 | 0.041013 | 0.014025 | 0.040615 |
| RFX2    | 2.009979 | 3.696045 | 0.000239 | 0.001461 | 0.000238 | 0.001457 |
| RFX3    | -0.20915 | -0.46636 | 0.641127 | 0.751632 | 0.641668 | 0.751892 |
| RFX5    | -1.05909 | -1.7291  | 0.084307 | 0.167616 | 0.083939 | 0.166955 |
| RFXANK  | 1.486285 | 2.369095 | 0.018148 | 0.04994  | 0.017993 | 0.049629 |
| RFXAP   | -1.03611 | -3.58338 | 0.000367 | 0.002077 | 0.000419 | 0.002316 |
| RG9MTD2 | 0.610318 | 1.614755 | 0.106891 | 0.2016   | 0.108318 | 0.203638 |
| RG9MTD3 | -0.83773 | -0.89273 | 0.372361 | 0.511725 | 0.370904 | 0.509871 |
| RGL2    | -0.0378  | -0.04628 | 0.963103 | 0.97792  | 0.963007 | 0.977902 |
| RGN     | 1.647103 | 3.188497 | 0.001505 | 0.006679 | 0.001507 | 0.006675 |
| RGS1    | 2.168942 | 2.65581  | 0.008123 | 0.026475 | 0.007958 | 0.026047 |
| RGS10   | 0.706674 | 1.108509 | 0.268088 | 0.406456 | 0.267403 | 0.405942 |
| RGS11   | 0.755704 | 1.405323 | 0.160445 | 0.274314 | 0.160352 | 0.274456 |
| RGS12   | 0.980968 | 1.650483 | 0.099369 | 0.190161 | 0.099036 | 0.189679 |
| RGS13   | -0.03969 | -0.06576 | 0.947588 | 0.969241 | 0.947531 | 0.969183 |
| RGS16   | -0.75203 | -0.92734 | 0.354125 | 0.494471 | 0.352885 | 0.492739 |
| RGS19   | 0.832339 | 1.351848 | 0.176935 | 0.296363 | 0.176409 | 0.295481 |

|          |          |          |          |          |          |          |
|----------|----------|----------|----------|----------|----------|----------|
| RGS2     | 1.129905 | 2.279645 | 0.02298  | 0.059837 | 0.02305  | 0.060052 |
| RGS3     | 0.980736 | 1.568022 | 0.117405 | 0.217074 | 0.116922 | 0.216352 |
| RGS4     | 2.530474 | 3.32699  | 0.000932 | 0.004469 | 0.000906 | 0.004369 |
| RGS5     | 1.473949 | 2.229949 | 0.026121 | 0.066219 | 0.025876 | 0.065738 |
| RGS6     | 1.61446  | 3.031441 | 0.002539 | 0.010342 | 0.002535 | 0.010316 |
| RHBDF1   | -0.55114 | -1.6136  | 0.107141 | 0.201991 | 0.109238 | 0.204712 |
| RHEB     | 1.183142 | 2.375718 | 0.017829 | 0.049379 | 0.017882 | 0.049429 |
| RHOA     | -1.92316 | -4.09355 | 4.83E-05 | 0.000378 | 4.92E-05 | 0.000381 |
| RHOC     | 2.127989 | 6.978435 | 7.95E-12 | 6.44E-10 | 1.17E-11 | 8.70E-10 |
| RHOJ     | -0.21249 | -0.40579 | 0.685042 | 0.787597 | 0.685047 | 0.787603 |
| RHOQ     | 1.336185 | 3.316378 | 0.000967 | 0.004605 | 0.001002 | 0.004751 |
| RHOT2    | 1.397078 | 3.60899  | 0.000333 | 0.001924 | 0.00035  | 0.002008 |
| RIN1     | 0.126578 | 0.190633 | 0.848878 | 0.903062 | 0.84863  | 0.902798 |
| RING1    | 0.121272 | 0.505166 | 0.613629 | 0.729538 | 0.619408 | 0.733304 |
| RIOK2    | -1.13586 | -2.23889 | 0.02553  | 0.065107 | 0.025572 | 0.065285 |
| RIPK1    | 2.18133  | 2.811429 | 0.005094 | 0.018157 | 0.004988 | 0.017868 |
| RIPK3    | 1.541102 | 3.981316 | 7.70E-05 | 0.000557 | 8.16E-05 | 0.000582 |
| RNASE1   | 4.609859 | 6.971183 | 8.34E-12 | 6.64E-10 | 7.67E-12 | 6.22E-10 |
| RNASE6   | 0.012346 | 0.013564 | 0.989182 | 0.992561 | 0.98915  | 0.992529 |
| RNASEH1  | 1.415059 | 2.132882 | 0.033341 | 0.081151 | 0.033047 | 0.080478 |
| RNASEH2A | -1.36879 | -2.23227 | 0.025967 | 0.065918 | 0.025789 | 0.065624 |
| RNASET2  | -1.41497 | -3.50672 | 0.000488 | 0.002611 | 0.000507 | 0.002695 |
| RND1     | -0.2825  | -0.42132 | 0.673672 | 0.77834  | 0.673144 | 0.777914 |
| RNF10    | -1.43863 | -1.99381 | 0.046626 | 0.105764 | 0.046168 | 0.104877 |
| RNF121   | -0.16861 | -0.6398  | 0.522551 | 0.651456 | 0.527898 | 0.656555 |
| RNF13    | -0.93164 | -1.77064 | 0.077131 | 0.156863 | 0.077119 | 0.156638 |
| RNF130   | -0.02417 | -0.05544 | 0.955805 | 0.974148 | 0.955892 | 0.974173 |
| RNF135   | -0.6205  | -1.78098 | 0.075424 | 0.154261 | 0.077051 | 0.156638 |
| RNF138   | 0.988631 | 2.254581 | 0.024521 | 0.063045 | 0.02479  | 0.063608 |
| RNF14    | 1.970202 | 4.374604 | 1.44E-05 | 0.000135 | 1.48E-05 | 0.000138 |
| RNF141   | 0.20182  | 0.556168 | 0.578304 | 0.698652 | 0.580121 | 0.700197 |
| RNF146   | -0.89152 | -1.17396 | 0.240879 | 0.375064 | 0.23979  | 0.373802 |
| RNF167   | -0.79038 | -2.73036 | 0.006513 | 0.022134 | 0.007061 | 0.023704 |
| RNF2     | -1.66365 | -3.63719 | 0.000299 | 0.001759 | 0.000305 | 0.001799 |
| RNF34    | -0.80356 | -1.81351 | 0.070254 | 0.145751 | 0.070747 | 0.146352 |
| RNF38    | 0.349808 | 0.502231 | 0.61569  | 0.730927 | 0.615013 | 0.730678 |
| RNF4     | -0.71004 | -1.75496 | 0.079779 | 0.161066 | 0.08068  | 0.162305 |
| RNF40    | 0.274413 | 0.436675 | 0.662504 | 0.769783 | 0.66208  | 0.769479 |
| RNF44    | -0.96088 | -1.62191 | 0.10535  | 0.199334 | 0.105016 | 0.198701 |
| RNF6     | -0.58785 | -0.782   | 0.434522 | 0.570621 | 0.433478 | 0.569568 |
| RNF7     | -0.67216 | -1.5858  | 0.113313 | 0.210836 | 0.114154 | 0.212149 |

|         |          |          |          |          |          |          |
|---------|----------|----------|----------|----------|----------|----------|
| RNF8    | 1.384869 | 4.03809  | 6.09E-05 | 0.000457 | 6.71E-05 | 0.000498 |
| RNGTT   | -0.7674  | -1.53542 | 0.12521  | 0.227831 | 0.125376 | 0.22778  |
| ROBO1   | -4.30121 | -4.87537 | 1.39E-06 | 1.98E-05 | 1.30E-06 | 1.86E-05 |
| ROCK1   | 2.899477 | 4.712729 | 3.04E-06 | 3.72E-05 | 2.96E-06 | 3.63E-05 |
| ROD1    | 0.378314 | 0.971108 | 0.331887 | 0.473405 | 0.333614 | 0.475004 |
| ROM1    | 2.185135 | 4.732201 | 2.77E-06 | 3.41E-05 | 2.85E-06 | 3.52E-05 |
| ROR2    | 2.470361 | 3.228991 | 0.00131  | 0.00595  | 0.001276 | 0.0058   |
| RORA    | -0.21719 | -0.41152 | 0.680835 | 0.784296 | 0.680819 | 0.784085 |
| RORC    | -0.57314 | -0.82645 | 0.408877 | 0.547187 | 0.407989 | 0.545999 |
| RP2     | 1.201984 | 1.483949 | 0.138349 | 0.245931 | 0.137336 | 0.244589 |
| RPA2    | -0.49085 | -1.69134 | 0.091293 | 0.178307 | 0.094522 | 0.182896 |
| RPA3    | 0.095057 | 0.151614 | 0.879542 | 0.925005 | 0.879384 | 0.924839 |
| RPE     | 1.38929  | 2.6791   | 0.007585 | 0.025106 | 0.00759  | 0.025157 |
| RPGR    | 1.135412 | 2.516069 | 0.012128 | 0.036145 | 0.012259 | 0.036444 |
| RPIA    | -0.91161 | -2.12685 | 0.033841 | 0.082007 | 0.03423  | 0.082714 |
| RPL10A  | 1.650582 | 5.255125 | 2.06E-07 | 3.64E-06 | 2.54E-07 | 4.39E-06 |
| RPL13A  | 0.944054 | 2.682586 | 0.007508 | 0.024884 | 0.007831 | 0.025791 |
| RPL18   | -0.45017 | -1.46056 | 0.144661 | 0.254217 | 0.148004 | 0.258713 |
| RPL27A  | -0.57954 | -1.58774 | 0.112874 | 0.210185 | 0.114559 | 0.212817 |
| RPL28   | -0.56415 | -0.84527 | 0.398301 | 0.536855 | 0.397502 | 0.535472 |
| RPL30   | 1.459254 | 4.408041 | 1.24E-05 | 0.00012  | 1.41E-05 | 0.000133 |
| RPL35   | -0.31279 | -1.0533  | 0.292631 | 0.43538  | 0.297106 | 0.43898  |
| RPL35A  | 0.341637 | 0.795462 | 0.42666  | 0.563604 | 0.427661 | 0.564767 |
| RPL36AL | -0.3703  | -0.86255 | 0.388733 | 0.527668 | 0.389762 | 0.528834 |
| RPL37   | 1.157278 | 2.945841 | 0.003346 | 0.012933 | 0.003455 | 0.013331 |
| RPL5    | -0.38147 | -1.38239 | 0.167369 | 0.283574 | 0.17223  | 0.290137 |
| RPL6    | -0.45071 | -0.92003 | 0.35793  | 0.49786  | 0.358239 | 0.498438 |
| RPL9    | 0.718496 | 1.323486 | 0.186179 | 0.307248 | 0.186048 | 0.306601 |
| RPN1    | 0.733323 | 2.572156 | 0.010347 | 0.03191  | 0.011161 | 0.033825 |
| RPS13   | 0.866018 | 2.333017 | 0.019978 | 0.053716 | 0.020522 | 0.055052 |
| RPS14   | 1.422496 | 5.24814  | 2.14E-07 | 3.76E-06 | 2.94E-07 | 5.01E-06 |
| RPS15A  | 0.188528 | 0.579349 | 0.562572 | 0.686063 | 0.565304 | 0.688007 |
| RPS16   | -0.02224 | -0.0787  | 0.9373   | 0.963541 | 0.937964 | 0.963865 |
| RPS20   | 1.967094 | 5.444923 | 7.58E-08 | 1.53E-06 | 8.70E-08 | 1.75E-06 |
| RPS21   | -2.03299 | -1.88412 | 0.060034 | 0.129668 | 0.05917  | 0.128216 |
| RPS23   | 0.512363 | 0.724526 | 0.469026 | 0.604283 | 0.468141 | 0.603837 |
| RPS24   | -0.69893 | -1.29715 | 0.195081 | 0.317479 | 0.194976 | 0.317528 |
| RPS25   | 0.075118 | 0.250823 | 0.802037 | 0.869717 | 0.803784 | 0.870658 |
| RPS27A  | 0.742845 | 2.798723 | 0.005296 | 0.018701 | 0.005894 | 0.020414 |
| RPS28   | 0.282348 | 0.947906 | 0.34356  | 0.485814 | 0.347991 | 0.487935 |
| RPS3    | -1.21337 | -3.74986 | 0.000194 | 0.001215 | 0.000215 | 0.001338 |

|         |          |          |          |          |          |          |
|---------|----------|----------|----------|----------|----------|----------|
| RPS4X   | -1.02164 | -3.35913 | 0.000832 | 0.00408  | 0.000921 | 0.004414 |
| RPS4Y1  | -2.72377 | -2.24281 | 0.025275 | 0.064666 | 0.024751 | 0.063568 |
| RPS5    | 0.432603 | 0.696379 | 0.486462 | 0.618632 | 0.485909 | 0.61807  |
| RPS6KA1 | -0.56756 | -1.30467 | 0.192506 | 0.314269 | 0.193393 | 0.315498 |
| RPS6KA3 | -0.3368  | -0.70124 | 0.483429 | 0.616452 | 0.483801 | 0.616724 |
| RPS6KA4 | 1.204873 | 2.67152  | 0.007757 | 0.02559  | 0.00785  | 0.025802 |
| RPS6KA5 | -1.31482 | -2.33381 | 0.019936 | 0.053692 | 0.019862 | 0.053557 |
| RPS6KB1 | 0.141256 | 0.392477 | 0.694845 | 0.794785 | 0.696274 | 0.796226 |
| RPS6KB2 | 1.647641 | 5.809303 | 1.02E-08 | 2.61E-07 | 1.43E-08 | 3.55E-07 |
| RPS6KC1 | -0.04655 | -0.10525 | 0.916216 | 0.949259 | 0.916366 | 0.94919  |
| RPS6KL1 | 2.310708 | 2.084373 | 0.03755  | 0.089012 | 0.036897 | 0.08776  |
| RPS9    | -0.01113 | -0.04021 | 0.967936 | 0.979947 | 0.968297 | 0.979949 |
| RQCD1   | -2.21826 | -2.40792 | 0.016345 | 0.045837 | 0.016026 | 0.045096 |
| RRAGA   | -1.26859 | -1.89876 | 0.058077 | 0.126663 | 0.05765  | 0.125951 |
| RRAGB   | 0.241626 | 0.499314 | 0.617742 | 0.732808 | 0.618013 | 0.733065 |
| RRAGD   | 0.536417 | 0.990394 | 0.322382 | 0.464214 | 0.322248 | 0.464022 |
| RRAS    | 0.34553  | 0.777898 | 0.436937 | 0.572489 | 0.437733 | 0.573237 |
| RRBP1   | -0.07016 | -0.17833 | 0.858523 | 0.911465 | 0.859001 | 0.911767 |
| RRM1    | 0.535591 | 0.930441 | 0.352518 | 0.492519 | 0.352156 | 0.492043 |
| RRM2B   | -0.0625  | -0.1287  | 0.897636 | 0.937739 | 0.897711 | 0.937742 |
| RSAD2   | 1.097095 | 1.248032 | 0.212508 | 0.339262 | 0.211204 | 0.337524 |
| RSBN1   | 1.096943 | 1.50744  | 0.132226 | 0.237471 | 0.131403 | 0.236445 |
| RSU1    | -0.66275 | -1.66699 | 0.096041 | 0.18477  | 0.097122 | 0.186774 |
| RTCD1   | 3.117505 | 6.23759  | 8.41E-10 | 2.99E-08 | 8.51E-10 | 3.05E-08 |
| RTN3    | -0.70741 | -1.12847 | 0.259575 | 0.397783 | 0.258942 | 0.396813 |
| RTN4    | 0.879653 | 1.685674 | 0.09238  | 0.179862 | 0.092392 | 0.17996  |
| RUFY1   | -0.57736 | -0.93576 | 0.349773 | 0.489411 | 0.349181 | 0.488874 |
| RUNX1   | 1.917608 | 4.007125 | 6.92E-05 | 0.000509 | 7.02E-05 | 0.000518 |
| RUNX2   | 1.012746 | 1.888326 | 0.059466 | 0.128738 | 0.059414 | 0.128507 |
| RUNX3   | -1.97608 | -2.76269 | 0.005909 | 0.020539 | 0.005807 | 0.020293 |
| RUVBL1  | -0.4546  | -0.94786 | 0.343584 | 0.485814 | 0.344    | 0.486518 |
| RXRA    | 2.913363 | 4.621125 | 4.68E-06 | 5.31E-05 | 4.54E-06 | 5.17E-05 |
| RXRG    | -2.33098 | -4.59402 | 5.31E-06 | 5.91E-05 | 5.33E-06 | 5.95E-05 |
| RYBP    | 0.978506 | 1.72548  | 0.084958 | 0.168695 | 0.084756 | 0.168153 |
| RYK     | 0.019872 | 0.03927  | 0.968688 | 0.979947 | 0.968698 | 0.979958 |
| RYR1    | 3.554382 | 4.116364 | 4.39E-05 | 0.000351 | 4.18E-05 | 0.000336 |
| RYR3    | 3.580214 | 5.473646 | 6.49E-08 | 1.33E-06 | 6.18E-08 | 1.27E-06 |
| S100A1  | -2.22794 | -2.44037 | 0.014962 | 0.042747 | 0.014665 | 0.042104 |
| S100A10 | 0.407398 | 0.805846 | 0.420652 | 0.558084 | 0.420808 | 0.558395 |
| S100A11 | -0.98854 | -2.62898 | 0.008784 | 0.028121 | 0.009065 | 0.028711 |
| S100A13 | -2.93733 | -4.69346 | 3.33E-06 | 4.00E-05 | 3.23E-06 | 3.90E-05 |

|         |          |          |          |          |          |          |
|---------|----------|----------|----------|----------|----------|----------|
| S100A2  | 3.085362 | 5.035044 | 6.33E-07 | 9.85E-06 | 6.13E-07 | 9.54E-06 |
| S100A3  | 0.894888 | 1.837035 | 0.066701 | 0.140015 | 0.066889 | 0.140319 |
| S100A8  | 2.272536 | 2.756189 | 0.006026 | 0.020811 | 0.005894 | 0.020414 |
| S100A9  | 4.528122 | 4.515212 | 7.62E-06 | 7.98E-05 | 7.12E-06 | 7.61E-05 |
| SAE1    | -1.2961  | -2.59447 | 0.009706 | 0.030352 | 0.009737 | 0.030449 |
| SAFB2   | -1.06631 | -3.05667 | 0.002338 | 0.009673 | 0.00247  | 0.010113 |
| SALL2   | -1.61067 | -2.17297 | 0.030174 | 0.074445 | 0.02981  | 0.07374  |
| SARDH   | 3.497479 | 4.367453 | 1.48E-05 | 0.000139 | 1.41E-05 | 0.000133 |
| SARS    | -1.30927 | -3.08168 | 0.002153 | 0.008995 | 0.002203 | 0.009181 |
| SART3   | 1.082989 | 4.965554 | 8.95E-07 | 1.35E-05 | 1.47E-06 | 2.04E-05 |
| SATB1   | 1.129114 | 2.480651 | 0.013388 | 0.039132 | 0.01352  | 0.039493 |
| SAV1    | 0.807359 | 1.8864   | 0.059725 | 0.12918  | 0.060287 | 0.130156 |
| SBF1    | 1.310444 | 2.710145 | 0.006918 | 0.023242 | 0.006961 | 0.023404 |
| SBNO1   | 1.589357 | 3.73578  | 0.000205 | 0.001278 | 0.000212 | 0.00132  |
| SC4MOL  | -0.14774 | -0.19839 | 0.842804 | 0.898057 | 0.842457 | 0.897704 |
| SCAMP1  | -0.30981 | -0.74973 | 0.453711 | 0.589561 | 0.454925 | 0.590648 |
| SCAMP3  | 0.408447 | 0.819547 | 0.412801 | 0.550559 | 0.413022 | 0.550228 |
| SCAND1  | -2.29326 | -3.28542 | 0.001078 | 0.005041 | 0.001054 | 0.004953 |
| SCAP    | -1.82257 | -6.85197 | 1.82E-11 | 1.24E-09 | 3.14E-11 | 1.99E-09 |
| SCARA3  | 0.168559 | 0.277373 | 0.781589 | 0.85682  | 0.781349 | 0.856223 |
| SCARB2  | -0.3644  | -0.38383 | 0.701237 | 0.799179 | 0.700361 | 0.798762 |
| SCD     | -0.89625 | -0.8784  | 0.380082 | 0.518943 | 0.378528 | 0.517572 |
| SCFD1   | -1.11661 | -2.7608  | 0.005943 | 0.020577 | 0.006092 | 0.020991 |
| SCG2    | -1.72507 | -2.76903 | 0.005797 | 0.020241 | 0.005733 | 0.020064 |
| SCGB1A1 | 2.785757 | 2.610765 | 0.009261 | 0.02925  | 0.009026 | 0.028626 |
| SCGB2A1 | -0.73355 | -0.66014 | 0.509417 | 0.638469 | 0.507957 | 0.63664  |
| SCGN    | -6.81118 | -6.92719 | 1.11E-11 | 8.30E-10 | 9.56E-12 | 7.36E-10 |
| SCMH1   | -2.36267 | -4.14563 | 3.88E-05 | 0.000314 | 3.83E-05 | 0.000311 |
| SCML1   | 0.356747 | 0.563293 | 0.573447 | 0.695693 | 0.572914 | 0.694911 |
| SCN1B   | 0.001118 | 0.001583 | 0.998737 | 0.998881 | 0.998735 | 0.998878 |
| SCN3A   | 0.212267 | 0.762687 | 0.445951 | 0.581245 | 0.451007 | 0.586533 |
| SCNN1A  | 0.983847 | 1.348408 | 0.178038 | 0.29768  | 0.177109 | 0.296444 |
| SCNN1B  | 0.488939 | 0.582927 | 0.560162 | 0.683835 | 0.559104 | 0.683074 |
| SCNN1D  | 0.714365 | 2.421253 | 0.015764 | 0.044498 | 0.016767 | 0.046879 |
| SCP2    | -1.09031 | -2.86143 | 0.004365 | 0.015951 | 0.004519 | 0.01644  |
| SCPEP1  | -1.56861 | -3.39046 | 0.000744 | 0.003707 | 0.000755 | 0.003767 |
| SCRG1   | -0.81537 | -0.84473 | 0.398599 | 0.536948 | 0.397125 | 0.535259 |
| SCUBE3  | -0.33974 | -0.5256  | 0.59936  | 0.716975 | 0.598808 | 0.716583 |
| SDAD1   | -0.41176 | -1.15924 | 0.246822 | 0.382481 | 0.249272 | 0.385514 |
| SDC1    | 3.84853  | 9.143021 | 9.40E-19 | 4.02E-16 | 1.10E-18 | 5.18E-16 |
| SDC3    | -1.39169 | -2.88592 | 0.004044 | 0.015008 | 0.004072 | 0.015072 |

|          |          |          |          |          |          |          |
|----------|----------|----------|----------|----------|----------|----------|
| SDC4     | 3.781698 | 4.650858 | 4.07E-06 | 4.73E-05 | 3.84E-06 | 4.51E-05 |
| SDCBP    | 1.517921 | 1.906761 | 0.05703  | 0.124962 | 0.056409 | 0.124063 |
| SDCBP2   | 2.665947 | 3.289022 | 0.001064 | 0.004998 | 0.001033 | 0.004874 |
| SDCCAG1  | 1.654525 | 2.613918 | 0.009176 | 0.029063 | 0.009079 | 0.028735 |
| SDCCAG8  | 3.306978 | 4.057388 | 5.62E-05 | 0.000427 | 5.37E-05 | 0.000412 |
| SDHA     | -0.2797  | -0.51909 | 0.603888 | 0.72074  | 0.603805 | 0.720592 |
| SDHB     | 0.648718 | 1.886018 | 0.059777 | 0.129232 | 0.061267 | 0.131667 |
| SDHC     | -0.02931 | -0.04943 | 0.960593 | 0.976418 | 0.960555 | 0.976389 |
| SDHD     | -0.61993 | -1.64034 | 0.101461 | 0.19322  | 0.102853 | 0.195553 |
| SDPR     | -0.57784 | -1.39964 | 0.162138 | 0.276793 | 0.163271 | 0.278236 |
| SDS      | 0.177869 | 0.312806 | 0.754537 | 0.835216 | 0.754381 | 0.835239 |
| SDSL     | 0.94457  | 1.369067 | 0.171492 | 0.288863 | 0.170692 | 0.287958 |
| SEC14L2  | 2.455628 | 3.197659 | 0.001459 | 0.006511 | 0.001421 | 0.006375 |
| SEC23B   | -0.98652 | -1.7195  | 0.086041 | 0.170343 | 0.085811 | 0.169869 |
| SEC23IP  | 2.498073 | 3.450435 | 0.000599 | 0.003118 | 0.000583 | 0.003039 |
| SEC24A   | 0.075506 | 0.197214 | 0.843727 | 0.898802 | 0.844321 | 0.899435 |
| SEC24B   | 0.074434 | 0.158904 | 0.873798 | 0.921232 | 0.873939 | 0.92138  |
| SEC24D   | 1.330042 | 2.216783 | 0.027013 | 0.067967 | 0.026852 | 0.06767  |
| SEC61A1  | -0.09128 | -0.2821  | 0.777963 | 0.853706 | 0.779501 | 0.854996 |
| SEC61B   | -0.25311 | -0.71804 | 0.473012 | 0.607586 | 0.475369 | 0.609936 |
| SEC61G   | -0.82005 | -1.52355 | 0.128151 | 0.231835 | 0.128063 | 0.231766 |
| SEH1L    | -0.31614 | -0.5631  | 0.573577 | 0.695693 | 0.573361 | 0.695073 |
| SEL1L    | -1.58987 | -1.96552 | 0.049816 | 0.111919 | 0.04923  | 0.110868 |
| SELENBP1 | -0.85351 | -1.3938  | 0.163896 | 0.278695 | 0.163398 | 0.278241 |
| SELK     | 2.227674 | 5.117013 | 4.19E-07 | 6.79E-06 | 4.40E-07 | 7.13E-06 |
| SELL     | 4.140294 | 4.276677 | 2.21E-05 | 0.000197 | 2.08E-05 | 0.000187 |
| SELP     | 1.14796  | 1.437939 | 0.150974 | 0.262622 | 0.149946 | 0.260997 |
| SELPLG   | -1.62428 | -1.93836 | 0.053049 | 0.118055 | 0.052411 | 0.116935 |
| SELS     | 1.679631 | 2.489109 | 0.013077 | 0.038318 | 0.012917 | 0.038016 |
| SELT     | -2.08146 | -5.81629 | 9.80E-09 | 2.55E-07 | 1.15E-08 | 2.94E-07 |
| SEMA3A   | -3.48905 | -3.72024 | 0.000218 | 0.001349 | 0.000208 | 0.001303 |
| SEMA3F   | 3.418606 | 3.685852 | 0.000249 | 0.001516 | 0.000238 | 0.001457 |
| SEMA4D   | 0.131425 | 0.335262 | 0.737545 | 0.826914 | 0.738423 | 0.827175 |
| SEMA4F   | 0.45489  | 0.667254 | 0.504867 | 0.634227 | 0.504097 | 0.63338  |
| SEMA7A   | 1.102142 | 1.399476 | 0.162189 | 0.276793 | 0.161155 | 0.275729 |
| SEMG1    | 2.095821 | 3.316153 | 0.000968 | 0.004605 | 0.000952 | 0.004534 |
| SENP6    | 0.563283 | 1.350762 | 0.177283 | 0.296628 | 0.178391 | 0.297952 |
| SEPHS2   | 0.172742 | 0.321971 | 0.747587 | 0.832206 | 0.74754  | 0.832568 |
| SEPP1    | 1.379805 | 2.362437 | 0.018475 | 0.050453 | 0.018373 | 0.050263 |
| SEPW1    | 0.052088 | 0.134952 | 0.892695 | 0.93378  | 0.893092 | 0.933822 |
| SEPX1    | 1.125176 | 2.284488 | 0.022692 | 0.059219 | 0.02277  | 0.059521 |

|          |          |          |          |          |          |          |
|----------|----------|----------|----------|----------|----------|----------|
| SERP1    | -0.87632 | -2.9081  | 0.003771 | 0.014225 | 0.004088 | 0.015104 |
| SERPINA3 | -4.35054 | -4.41048 | 1.22E-05 | 0.000119 | 1.15E-05 | 0.000114 |
| SERPINA4 | 0.351854 | 0.501432 | 0.616252 | 0.73141  | 0.615563 | 0.731009 |
| SERPINA5 | -2.08407 | -2.4688  | 0.013835 | 0.040189 | 0.013578 | 0.039613 |
| SERPINB1 | -0.10354 | -0.17113 | 0.864182 | 0.914121 | 0.864034 | 0.913968 |
| SERPINB2 | -0.73582 | -0.91297 | 0.361624 | 0.501085 | 0.360398 | 0.500404 |
| SERPINB5 | -0.73467 | -0.82483 | 0.409799 | 0.547798 | 0.408444 | 0.546274 |
| SERPINB8 | 2.486226 | 2.378279 | 0.017707 | 0.049108 | 0.017332 | 0.048174 |
| SERPINB9 | -0.52923 | -0.69635 | 0.486482 | 0.618632 | 0.485471 | 0.617681 |
| SERPINE1 | 0.48308  | 0.663489 | 0.507273 | 0.636461 | 0.506368 | 0.635496 |
| SERPING1 | 1.110714 | 2.276949 | 0.023142 | 0.060125 | 0.023234 | 0.060431 |
| SERPINH1 | -0.5489  | -1.26863 | 0.205066 | 0.330072 | 0.206001 | 0.33126  |
| SESN1    | -0.53463 | -0.69835 | 0.485227 | 0.617695 | 0.484201 | 0.616733 |
| SET      | 0.002234 | 0.005476 | 0.995633 | 0.996481 | 0.995645 | 0.996493 |
| SETBP1   | -0.35701 | -0.85744 | 0.391545 | 0.530335 | 0.392768 | 0.53137  |
| SETDB1   | -0.28973 | -0.50922 | 0.610787 | 0.727127 | 0.61055  | 0.726845 |
| SEZ6L    | 1.271006 | 1.23093  | 0.218833 | 0.348177 | 0.217319 | 0.346003 |
| SEZ6L2   | -1.24622 | -2.81381 | 0.005057 | 0.018065 | 0.005134 | 0.018237 |
| SF1      | -2.20234 | -4.54818 | 6.55E-06 | 7.12E-05 | 6.65E-06 | 7.18E-05 |
| SF3A1    | -1.52034 | -3.58344 | 0.000367 | 0.002077 | 0.000378 | 0.002139 |
| SF3A3    | -0.33446 | -1.26094 | 0.207822 | 0.333823 | 0.213605 | 0.340781 |
| SF3B1    | -0.26054 | -0.61629 | 0.537938 | 0.664991 | 0.538903 | 0.665313 |
| SF3B2    | -0.3881  | -1.17344 | 0.241088 | 0.375203 | 0.244214 | 0.378815 |
| SF3B4    | -0.37944 | -1.18174 | 0.237779 | 0.371653 | 0.241212 | 0.375195 |
| SFN      | 4.727392 | 7.565919 | 1.46E-13 | 1.64E-11 | 1.35E-13 | 1.51E-11 |
| SFPQ     | -0.99978 | -3.82887 | 0.000142 | 0.000921 | 0.000173 | 0.001101 |
| SFTPD    | -1.8484  | -2.04614 | 0.04118  | 0.095672 | 0.040587 | 0.094763 |
| SFXN1    | 0.703994 | 0.676042 | 0.499276 | 0.630297 | 0.497855 | 0.629144 |
| SFXN3    | 1.92596  | 4.431018 | 1.12E-05 | 0.000111 | 1.16E-05 | 0.000114 |
| SGCA     | -1.32923 | -1.45732 | 0.145552 | 0.255544 | 0.144359 | 0.25402  |
| SGCD     | -1.16673 | -3.08354 | 0.00214  | 0.008948 | 0.002229 | 0.00928  |
| SGCE     | -0.37655 | -0.38118 | 0.703205 | 0.800257 | 0.702304 | 0.799799 |
| SGK2     | 2.102629 | 2.734927 | 0.006424 | 0.021896 | 0.006299 | 0.021563 |
| SGOL1    | 0.044599 | 0.045126 | 0.964022 | 0.978347 | 0.963907 | 0.978269 |
| SGPL1    | 0.915888 | 2.018266 | 0.04401  | 0.100999 | 0.04432  | 0.101314 |
| SGPP2    | 2.112467 | 2.508754 | 0.012379 | 0.036745 | 0.012143 | 0.036201 |
| SGTB     | 1.010089 | 1.901688 | 0.057692 | 0.126001 | 0.057662 | 0.125951 |
| SH2D1A   | -1.41893 | -3.94106 | 9.07E-05 | 0.000637 | 9.80E-05 | 0.00068  |
| SH2D2A   | 2.92544  | 5.33088  | 1.39E-07 | 2.58E-06 | 1.37E-07 | 2.57E-06 |
| SH2D3C   | 2.876017 | 4.750517 | 2.54E-06 | 3.17E-05 | 2.48E-06 | 3.12E-05 |
| SH2D4A   | 2.406904 | 4.98391  | 8.17E-07 | 1.25E-05 | 8.31E-07 | 1.27E-05 |

|         |          |          |          |          |          |          |
|---------|----------|----------|----------|----------|----------|----------|
| SH3BGR  | 2.355377 | 2.361159 | 0.018538 | 0.050567 | 0.018163 | 0.049923 |
| SH3BP5  | 1.560259 | 2.336012 | 0.01982  | 0.053414 | 0.019611 | 0.053032 |
| SH3GLB1 | -2.32862 | -2.99294 | 0.002877 | 0.011401 | 0.00281  | 0.011201 |
| SHANK2  | 2.059114 | 3.016341 | 0.002667 | 0.010751 | 0.002619 | 0.010567 |
| SHB     | 1.195911 | 1.701104 | 0.089443 | 0.175746 | 0.088814 | 0.17451  |
| SHC1    | 0.409965 | 0.862789 | 0.388599 | 0.527668 | 0.389056 | 0.528028 |
| SHFM1   | 0.323747 | 1.016026 | 0.310028 | 0.451963 | 0.313651 | 0.455972 |
| SHMT1   | 1.10071  | 1.346379 | 0.178691 | 0.298347 | 0.177559 | 0.296985 |
| SHOX2   | -0.87027 | -2.09822 | 0.036305 | 0.086571 | 0.036795 | 0.087608 |
| SIAH2   | 0.288189 | 0.437711 | 0.661754 | 0.769291 | 0.661241 | 0.769075 |
| SIGLEC5 | 0.618543 | 0.989595 | 0.322772 | 0.464387 | 0.322139 | 0.464006 |
| SILV    | -1.188   | -1.28657 | 0.198741 | 0.322097 | 0.197394 | 0.320246 |
| SIM2    | 0.438502 | 0.560685 | 0.575222 | 0.696417 | 0.574291 | 0.695557 |
| SIP1    | 0.525333 | 0.719733 | 0.47197  | 0.606601 | 0.471022 | 0.605691 |
| SIPA1   | -1.06761 | -3.07401 | 0.002208 | 0.009169 | 0.002337 | 0.009658 |
| SIRPB1  | -2.22656 | -2.38564 | 0.01736  | 0.048278 | 0.017022 | 0.047395 |
| SIRT2   | 1.143469 | 2.055184 | 0.040295 | 0.094222 | 0.040194 | 0.094179 |
| SIRT5   | 0.363931 | 0.668174 | 0.50428  | 0.633891 | 0.504143 | 0.63338  |
| SIRT6   | 2.34926  | 2.312539 | 0.021087 | 0.05612  | 0.020671 | 0.055357 |
| SIX5    | 0.225483 | 0.35514  | 0.72261  | 0.814843 | 0.722236 | 0.814567 |
| SKI     | 0.60624  | 1.10657  | 0.268925 | 0.40733  | 0.268747 | 0.407061 |
| SKIL    | 2.84604  | 5.861538 | 7.58E-09 | 2.04E-07 | 7.74E-09 | 2.12E-07 |
| SKP2    | -0.02689 | -0.04049 | 0.967716 | 0.979947 | 0.967662 | 0.979949 |
| SLA     | 1.289902 | 3.855792 | 0.000128 | 0.000841 | 0.000141 | 0.000917 |
| SLAMF1  | 1.427457 | 2.25897  | 0.024245 | 0.062507 | 0.024048 | 0.062    |
| SLBP    | 1.397397 | 3.286829 | 0.001073 | 0.005021 | 0.001101 | 0.005132 |
| SLC11A1 | 3.935949 | 6.168848 | 1.27E-09 | 4.32E-08 | 1.20E-09 | 4.14E-08 |
| SLC11A2 | -0.65447 | -1.43787 | 0.150994 | 0.262622 | 0.151582 | 0.263183 |
| SLC12A2 | -0.60167 | -1.01828 | 0.308954 | 0.450818 | 0.3085   | 0.450435 |
| SLC12A9 | 1.008298 | 2.738352 | 0.006359 | 0.021751 | 0.006597 | 0.022405 |
| SLC15A1 | -0.22979 | -0.37695 | 0.706346 | 0.802666 | 0.706024 | 0.802457 |
| SLC15A2 | 0.518015 | 0.550605 | 0.58211  | 0.702142 | 0.580957 | 0.700993 |
| SLC16A1 | -1.90131 | -3.556   | 0.000406 | 0.002252 | 0.000405 | 0.002267 |
| SLC16A2 | 1.124203 | 1.199763 | 0.230706 | 0.363744 | 0.229288 | 0.362115 |
| SLC16A3 | -0.33631 | -0.80576 | 0.4207   | 0.558084 | 0.421884 | 0.559023 |
| SLC16A4 | 1.284066 | 2.689282 | 0.00736  | 0.0245   | 0.007412 | 0.024673 |
| SLC16A5 | -1.54239 | -2.53594 | 0.011468 | 0.034529 | 0.011373 | 0.034354 |
| SLC16A7 | 0.056507 | 0.112809 | 0.91022  | 0.945507 | 0.910258 | 0.945461 |
| SLC16A9 | -1.06679 | -1.245   | 0.213621 | 0.340854 | 0.212353 | 0.339015 |
| SLC17A4 | 4.24906  | 3.884221 | 0.000114 | 0.000768 | 0.000108 | 0.000731 |
| SLC18A2 | -0.20775 | -0.26005 | 0.794916 | 0.865641 | 0.794411 | 0.86509  |



|          |          |          |          |          |          |          |
|----------|----------|----------|----------|----------|----------|----------|
| SLC19A2  | -0.49612 | -1.25958 | 0.208311 | 0.334265 | 0.209857 | 0.336287 |
| SLC1A3   | 1.948309 | 3.353598 | 0.000848 | 0.004147 | 0.00084  | 0.004114 |
| SLC1A4   | 0.107594 | 0.121811 | 0.903089 | 0.941553 | 0.902812 | 0.941473 |
| SLC1A5   | -0.64948 | -1.38149 | 0.167643 | 0.283936 | 0.168099 | 0.284503 |
| SLC20A1  | -0.90609 | -1.1145  | 0.265514 | 0.404249 | 0.264278 | 0.402498 |
| SLC22A11 | -2.45162 | -2.6331  | 0.00868  | 0.027903 | 0.008479 | 0.027433 |
| SLC22A17 | 2.097591 | 2.714237 | 0.006834 | 0.023043 | 0.006702 | 0.022661 |
| SLC22A18 | -0.09916 | -0.12814 | 0.898081 | 0.937996 | 0.897838 | 0.937742 |
| SLC23A1  | 2.332689 | 5.617497 | 2.97E-08 | 6.62E-07 | 3.21E-08 | 7.22E-07 |
| SLC24A1  | -1.07011 | -1.21497 | 0.224856 | 0.355953 | 0.223531 | 0.354333 |
| SLC25A1  | 0.285149 | 0.27341  | 0.784632 | 0.858232 | 0.783936 | 0.858019 |
| SLC25A11 | 0.807511 | 2.344266 | 0.019391 | 0.052484 | 0.020097 | 0.054036 |
| SLC25A12 | -2.97597 | -3.11221 | 0.001946 | 0.008236 | 0.001883 | 0.008032 |
| SLC25A13 | 1.229609 | 3.132692 | 0.001817 | 0.007791 | 0.001883 | 0.008032 |
| SLC25A14 | 1.896991 | 4.504284 | 8.01E-06 | 8.32E-05 | 8.41E-06 | 8.66E-05 |
| SLC25A20 | -0.90719 | -1.41902 | 0.156415 | 0.269187 | 0.155815 | 0.268548 |
| SLC25A5  | -2.81763 | -4.60007 | 5.16E-06 | 5.76E-05 | 5.02E-06 | 5.63E-05 |
| SLC26A2  | 0.72486  | 2.158107 | 0.031317 | 0.076942 | 0.032391 | 0.079208 |
| SLC26A3  | 0.40233  | 0.394941 | 0.693027 | 0.79415  | 0.692077 | 0.79355  |
| SLC29A2  | 0.952556 | 1.367077 | 0.172115 | 0.289735 | 0.171292 | 0.288763 |
| SLC2A3   | 0.846198 | 1.775266 | 0.076363 | 0.155604 | 0.076633 | 0.156055 |
| SLC2A4RG | 3.001935 | 5.793479 | 1.12E-08 | 2.82E-07 | 1.11E-08 | 2.86E-07 |
| SLC2A5   | -1.16511 | -1.24957 | 0.211947 | 0.338482 | 0.210564 | 0.33673  |
| SLC2A8   | 0.143356 | 0.382327 | 0.702355 | 0.799677 | 0.703546 | 0.800064 |
| SLC30A3  | -0.34337 | -0.67474 | 0.500101 | 0.630891 | 0.500218 | 0.630471 |
| SLC30A4  | 2.073968 | 4.810074 | 1.91E-06 | 2.50E-05 | 2.00E-06 | 2.66E-05 |
| SLC30A5  | -0.48374 | -1.05637 | 0.291227 | 0.433703 | 0.291889 | 0.434414 |
| SLC33A1  | -0.06666 | -0.12185 | 0.903062 | 0.941553 | 0.903028 | 0.941489 |
| SLC35A1  | -1.23567 | -1.74343 | 0.081773 | 0.163824 | 0.081161 | 0.162807 |
| SLC35A3  | 3.016545 | 4.227234 | 2.74E-05 | 0.000234 | 2.63E-05 | 0.000227 |
| SLC35B1  | 2.704348 | 3.03498  | 0.00251  | 0.010251 | 0.002438 | 0.010025 |
| SLC35B3  | 1.215111 | 1.8413   | 0.066073 | 0.138888 | 0.06563  | 0.138386 |
| SLC35B4  | -0.60449 | -1.42341 | 0.155138 | 0.267774 | 0.156091 | 0.26863  |
| SLC35C2  | -2.56007 | -4.43205 | 1.11E-05 | 0.000111 | 1.09E-05 | 0.000109 |
| SLC35D2  | -0.14901 | -0.33345 | 0.73891  | 0.827269 | 0.739329 | 0.827175 |
| SLC35E1  | -0.93317 | -2.18142 | 0.029541 | 0.073321 | 0.0299   | 0.073884 |
| SLC35F5  | -1.11977 | -1.79951 | 0.072443 | 0.149137 | 0.072075 | 0.148772 |
| SLC37A1  | -0.60305 | -1.07061 | 0.284776 | 0.425715 | 0.284492 | 0.425426 |
| SLC37A4  | 2.201799 | 5.368682 | 1.14E-07 | 2.19E-06 | 1.23E-07 | 2.36E-06 |
| SLC38A2  | -1.01649 | -3.06078 | 0.002307 | 0.009552 | 0.002462 | 0.010098 |
| SLC39A1  | -0.02773 | -0.06815 | 0.945692 | 0.968229 | 0.94585  | 0.968393 |

|          |          |          |          |          |          |          |
|----------|----------|----------|----------|----------|----------|----------|
| SLC39A11 | 0.099175 | 0.201221 | 0.840594 | 0.8975   | 0.840687 | 0.897394 |
| SLC39A6  | -1.48081 | -2.36317 | 0.018438 | 0.050451 | 0.018282 | 0.050103 |
| SLC39A8  | -0.78804 | -1.33563 | 0.182179 | 0.302468 | 0.181772 | 0.30199  |
| SLC3A1   | -0.32451 | -0.39224 | 0.695018 | 0.794789 | 0.69425  | 0.794298 |
| SLC3A2   | -0.95989 | -1.73535 | 0.083195 | 0.166036 | 0.083055 | 0.165687 |
| SLC40A1  | 4.14261  | 5.216952 | 2.51E-07 | 4.36E-06 | 2.34E-07 | 4.11E-06 |
| SLC43A1  | -0.64497 | -1.66338 | 0.09676  | 0.185841 | 0.097977 | 0.187956 |
| SLC4A2   | 0.062162 | 0.069553 | 0.944573 | 0.967631 | 0.944412 | 0.967466 |
| SLC4A3   | 2.421071 | 4.019148 | 6.59E-05 | 0.000485 | 6.46E-05 | 0.000483 |
| SLC4A4   | 2.625965 | 3.703874 | 0.000232 | 0.001425 | 0.000225 | 0.001395 |
| SLC4A7   | 0.400378 | 1.085461 | 0.278155 | 0.417944 | 0.280313 | 0.42038  |
| SLC5A1   | 2.202082 | 2.490857 | 0.013014 | 0.038156 | 0.012755 | 0.037584 |
| SLC5A6   | -0.73406 | -1.11741 | 0.264267 | 0.402742 | 0.263501 | 0.401791 |
| SLC6A1   | 1.731425 | 4.533038 | 7.02E-06 | 7.52E-05 | 7.60E-06 | 8.01E-05 |
| SLC6A2   | -1.59527 | -2.95107 | 0.003291 | 0.012751 | 0.003282 | 0.012737 |
| SLC6A5   | -1.53549 | -2.2293  | 0.026165 | 0.066294 | 0.025886 | 0.065738 |
| SLC6A6   | 0.491247 | 0.780755 | 0.435256 | 0.571106 | 0.434636 | 0.570176 |
| SLC6A8   | 0.33571  | 0.294222 | 0.76869  | 0.847091 | 0.767904 | 0.846724 |
| SLC7A1   | 1.303231 | 2.466364 | 0.013929 | 0.04041  | 0.01392  | 0.040387 |
| SLC7A5   | -0.39947 | -0.72563 | 0.468348 | 0.604237 | 0.468166 | 0.603837 |
| SLC7A8   | 0.480164 | 0.763071 | 0.445722 | 0.581108 | 0.445107 | 0.580668 |
| SLC7A9   | -0.24314 | -0.28243 | 0.777714 | 0.853633 | 0.777111 | 0.852971 |
| SLC9A3R1 | -1.20159 | -2.35527 | 0.018831 | 0.051249 | 0.018859 | 0.051324 |
| SLC9A6   | 0.294382 | 0.567973 | 0.570266 | 0.692571 | 0.570307 | 0.692442 |
| SLC9A8   | -0.27601 | -0.29118 | 0.771016 | 0.848063 | 0.770331 | 0.847706 |
| SLCO2A1  | 0.692494 | 1.083    | 0.279245 | 0.419179 | 0.278548 | 0.418134 |
| SLCO2B1  | 0.029007 | 0.07675  | 0.938848 | 0.963946 | 0.939096 | 0.964122 |
| SLCO3A1  | -1.04942 | -1.27436 | 0.20303  | 0.327918 | 0.201841 | 0.326447 |
| SLCO4A1  | -1.69474 | -1.72209 | 0.08557  | 0.169554 | 0.08458  | 0.167945 |
| SLIT2    | 0.597747 | 0.890887 | 0.373348 | 0.512631 | 0.372525 | 0.5118   |
| SLIT3    | 1.434986 | 1.828991 | 0.067899 | 0.14192  | 0.067226 | 0.140865 |
| SLMAP    | 0.804016 | 1.118238 | 0.263914 | 0.402465 | 0.262925 | 0.401124 |
| SLPI     | -2.34919 | -2.62506 | 0.008885 | 0.028378 | 0.008688 | 0.027873 |
| SLU7     | 1.075518 | 1.462446 | 0.144144 | 0.253642 | 0.143272 | 0.252485 |
| SMAD1    | 1.60209  | 2.342813 | 0.019466 | 0.05261  | 0.019244 | 0.0521   |
| SMAD2    | 0.491078 | 0.610817 | 0.541553 | 0.667811 | 0.540524 | 0.666613 |
| SMAD3    | 0.18326  | 0.444064 | 0.657157 | 0.765652 | 0.658026 | 0.766284 |
| SMAD4    | 0.091484 | 0.138557 | 0.889847 | 0.931881 | 0.889668 | 0.931693 |
| SMAD5    | 1.19081  | 1.745175 | 0.081468 | 0.1634   | 0.080916 | 0.162476 |
| SMAD6    | 0.761582 | 1.123583 | 0.261641 | 0.399907 | 0.260794 | 0.398825 |
| SMAD7    | 1.388423 | 2.583574 | 0.010014 | 0.031047 | 0.009997 | 0.031076 |

|          |          |          |          |          |          |          |
|----------|----------|----------|----------|----------|----------|----------|
| SMARCA1  | 0.316434 | 0.371489 | 0.710405 | 0.805222 | 0.709644 | 0.804872 |
| SMARCA2  | 0.165964 | 0.498843 | 0.618073 | 0.733016 | 0.620358 | 0.734062 |
| SMARCA4  | -0.31069 | -0.5892  | 0.55595  | 0.680942 | 0.555932 | 0.680792 |
| SMARCA5  | -0.67578 | -2.33172 | 0.020046 | 0.053839 | 0.021302 | 0.05666  |
| SMARCAD1 | -0.62399 | -1.21174 | 0.226089 | 0.357784 | 0.226164 | 0.358144 |
| SMARCAL1 | -1.50227 | -1.70715 | 0.088313 | 0.173815 | 0.087406 | 0.172174 |
| SMARCB1  | -1.21004 | -2.43312 | 0.015261 | 0.043326 | 0.01531  | 0.04353  |
| SMARCC1  | 1.24774  | 1.674794 | 0.094497 | 0.182557 | 0.093762 | 0.181655 |
| SMARCD1  | -2.75763 | -5.5247  | 4.93E-08 | 1.05E-06 | 4.98E-08 | 1.06E-06 |
| SMARCD2  | -2.62733 | -3.26265 | 0.001167 | 0.005408 | 0.001133 | 0.005267 |
| SMARCD3  | 0.395677 | 0.58762  | 0.55701  | 0.681756 | 0.556323 | 0.681094 |
| SMG1     | -0.60507 | -0.8538  | 0.393558 | 0.532448 | 0.392611 | 0.53132  |
| SMNDC1   | 2.894377 | 5.045897 | 6.00E-07 | 9.36E-06 | 5.87E-07 | 9.23E-06 |
| SMO      | 0.827382 | 1.982997 | 0.047825 | 0.108184 | 0.048392 | 0.109295 |
| SMOC2    | 2.535827 | 3.508938 | 0.000484 | 0.002598 | 0.00047  | 0.002539 |
| SMPD1    | 4.822015 | 6.171313 | 1.25E-09 | 4.29E-08 | 1.14E-09 | 3.96E-08 |
| SMTN     | -1.4627  | -3.62425 | 0.000314 | 0.001831 | 0.000328 | 0.001892 |
| SMU1     | 0.451032 | 1.501895 | 0.133652 | 0.239758 | 0.137151 | 0.244355 |
| SMUG1    | -0.38459 | -0.87872 | 0.379905 | 0.518906 | 0.38082  | 0.519401 |
| SMYD2    | 0.659805 | 1.184054 | 0.236862 | 0.37096  | 0.236624 | 0.370588 |
| SMYD5    | 1.089486 | 1.871228 | 0.061802 | 0.132573 | 0.061582 | 0.132174 |
| SNAP25   | 0.154552 | 0.252262 | 0.800925 | 0.869618 | 0.800695 | 0.869306 |
| SNAP29   | -1.01747 | -1.42784 | 0.15386  | 0.266056 | 0.153025 | 0.2651   |
| SNAPC4   | 0.331893 | 1.03569  | 0.300766 | 0.442252 | 0.304321 | 0.445996 |
| SNCA     | -0.57066 | -0.77153 | 0.440697 | 0.576475 | 0.439691 | 0.575319 |
| SNCAIP   | -1.1016  | -1.25242 | 0.210906 | 0.337693 | 0.209604 | 0.336088 |
| SNCG     | 0.926074 | 1.054172 | 0.29223  | 0.435059 | 0.290854 | 0.433285 |
| SND1     | 0.389457 | 0.596378 | 0.551148 | 0.67652  | 0.550523 | 0.675753 |
| SNN      | 0.049337 | 0.137514 | 0.89067  | 0.932328 | 0.891212 | 0.932895 |
| SNRPA    | -0.78862 | -1.04975 | 0.294255 | 0.436494 | 0.293159 | 0.435238 |
| SNRPA1   | -0.72243 | -1.55164 | 0.121278 | 0.222573 | 0.121717 | 0.223116 |
| SNRPB    | -0.98073 | -2.29335 | 0.022174 | 0.058287 | 0.022468 | 0.058921 |
| SNRPB2   | 0.830511 | 1.324206 | 0.18594  | 0.30707  | 0.185354 | 0.305892 |
| SNRPC    | -1.34862 | -4.6436  | 4.21E-06 | 4.88E-05 | 5.20E-06 | 5.82E-05 |
| SNRPD2   | -1.15101 | -4.83398 | 1.70E-06 | 2.29E-05 | 2.50E-06 | 3.14E-05 |
| SNRPD3   | -1.89368 | -2.80623 | 0.005176 | 0.018414 | 0.005097 | 0.018135 |
| SNRPE    | -0.61748 | -1.40257 | 0.161263 | 0.275613 | 0.162035 | 0.276832 |
| SNRPF    | -2.31421 | -3.31067 | 0.000987 | 0.00468  | 0.000964 | 0.004583 |
| SNRPG    | -0.11813 | -0.32141 | 0.74801  | 0.832303 | 0.749118 | 0.833141 |
| SNRPN    | -1.68895 | -2.55429 | 0.010887 | 0.033119 | 0.010756 | 0.032827 |
| SNTA1    | 0.782658 | 0.923876 | 0.355923 | 0.496391 | 0.354609 | 0.494706 |

|         |          |          |          |          |          |          |
|---------|----------|----------|----------|----------|----------|----------|
| SNTB1   | 1.055345 | 1.378295 | 0.168628 | 0.285192 | 0.167627 | 0.284011 |
| SNTB2   | 1.154482 | 2.479252 | 0.01344  | 0.039211 | 0.013548 | 0.039551 |
| SNX1    | -1.59512 | -2.05121 | 0.040681 | 0.094889 | 0.040197 | 0.094179 |
| SNX15   | -0.50014 | -0.78948 | 0.430143 | 0.566771 | 0.429501 | 0.566084 |
| SOCS1   | 2.649302 | 3.145544 | 0.00174  | 0.007524 | 0.00169  | 0.007355 |
| SOCS2   | -0.10695 | -0.2298  | 0.818326 | 0.882244 | 0.818539 | 0.882192 |
| SOCS3   | 2.840914 | 7.197419 | 1.85E-12 | 1.74E-10 | 2.16E-12 | 2.07E-10 |
| SOCS6   | 0.838836 | 2.919148 | 0.003642 | 0.013883 | 0.003997 | 0.014897 |
| SOD1    | -1.38803 | -4.17282 | 3.46E-05 | 0.000285 | 3.87E-05 | 0.000314 |
| SOD3    | -0.762   | -1.32486 | 0.185723 | 0.307019 | 0.185394 | 0.305892 |
| SORCS2  | 1.337008 | 2.316908 | 0.020846 | 0.055684 | 0.020746 | 0.055464 |
| SORL1   | 1.219419 | 2.51331  | 0.012222 | 0.03638  | 0.012285 | 0.036496 |
| SORT1   | 2.496429 | 3.249803 | 0.00122  | 0.005615 | 0.001187 | 0.005481 |
| SOS1    | 1.25148  | 2.640662 | 0.008491 | 0.027445 | 0.008554 | 0.027575 |
| SOX10   | -6.31002 | -9.90969 | 1.55E-21 | 9.10E-19 | 1.33E-21 | 7.83E-19 |
| SOX13   | 0.578953 | 0.802945 | 0.422326 | 0.559451 | 0.421358 | 0.558863 |
| SOX30   | -0.37152 | -0.35548 | 0.722355 | 0.814752 | 0.721472 | 0.814278 |
| SOX5    | 0.031798 | 0.058065 | 0.953716 | 0.972757 | 0.953699 | 0.97274  |
| SOX8    | -2.90621 | -3.50371 | 0.000493 | 0.002634 | 0.000476 | 0.002565 |
| SOX9    | 1.500083 | 1.396719 | 0.163016 | 0.277902 | 0.161598 | 0.276186 |
| SP1     | -0.99068 | -1.85926 | 0.063481 | 0.13522  | 0.063442 | 0.135104 |
| SP100   | 1.123318 | 1.462195 | 0.144213 | 0.253668 | 0.143265 | 0.252485 |
| SP110   | 2.111778 | 4.705648 | 3.15E-06 | 3.82E-05 | 3.26E-06 | 3.92E-05 |
| SP140   | 0.576308 | 0.704501 | 0.481395 | 0.614521 | 0.480251 | 0.613552 |
| SP2     | 0.365429 | 0.8137   | 0.416141 | 0.553911 | 0.416888 | 0.554204 |
| SP3     | 0.677278 | 1.31369  | 0.189454 | 0.310689 | 0.189521 | 0.310906 |
| SPA17   | 2.611331 | 5.304688 | 1.59E-07 | 2.91E-06 | 1.61E-07 | 2.95E-06 |
| SPAG1   | 2.369403 | 2.840953 | 0.004651 | 0.016854 | 0.004542 | 0.016508 |
| SPAG5   | 0.356906 | 0.664001 | 0.506945 | 0.63622  | 0.506856 | 0.635768 |
| SPAG7   | -0.20124 | -0.32729 | 0.743565 | 0.830898 | 0.743267 | 0.830565 |
| SPAG9   | 1.693688 | 3.490701 | 0.000517 | 0.002738 | 0.000522 | 0.002753 |
| SPARC   | 2.828235 | 3.978824 | 7.78E-05 | 0.000561 | 7.52E-05 | 0.000544 |
| SPARCL1 | 2.097531 | 3.034743 | 0.002512 | 0.010251 | 0.002465 | 0.0101   |
| SPATA2  | -0.20257 | -0.25054 | 0.802253 | 0.869717 | 0.801756 | 0.869306 |
| SPDEF   | -0.92469 | -0.93922 | 0.347996 | 0.488525 | 0.346466 | 0.487542 |
| SPG20   | -0.51187 | -1.04523 | 0.296338 | 0.438356 | 0.29665  | 0.438485 |
| SPG7    | 1.063722 | 1.850961 | 0.064668 | 0.137011 | 0.064468 | 0.136549 |
| SPHK1   | -0.91346 | -1.37392 | 0.169981 | 0.286862 | 0.169267 | 0.28617  |
| SPIB    | 0.768341 | 0.787406 | 0.431356 | 0.567574 | 0.429904 | 0.566456 |
| SPINK1  | 3.850461 | 3.392221 | 0.000739 | 0.003699 | 0.000708 | 0.003586 |
| SPINT1  | 2.488586 | 4.182184 | 3.32E-05 | 0.000276 | 3.26E-05 | 0.000271 |

|        |          |          |          |          |          |          |
|--------|----------|----------|----------|----------|----------|----------|
| SPINT2 | 4.14363  | 5.948295 | 4.61E-09 | 1.37E-07 | 4.30E-09 | 1.32E-07 |
| SPIRE2 | 1.235473 | 1.713511 | 0.087137 | 0.171835 | 0.086478 | 0.170776 |
| SPON1  | 4.323228 | 5.617767 | 2.97E-08 | 6.62E-07 | 2.75E-08 | 6.30E-07 |
| SPOP   | 0.399961 | 0.899861 | 0.368557 | 0.507386 | 0.369384 | 0.508228 |
| SPRED2 | 1.016202 | 1.698574 | 0.08992  | 0.176167 | 0.089589 | 0.175592 |
| SPRR1B | 0.69783  | 1.244727 | 0.21372  | 0.340854 | 0.213466 | 0.340675 |
| SPRY1  | -2.51433 | -2.68446 | 0.007466 | 0.024787 | 0.007286 | 0.024303 |
| SPRY2  | -0.68522 | -1.39    | 0.165047 | 0.280448 | 0.16529  | 0.280659 |
| SPTA1  | 1.538277 | 3.629194 | 0.000309 | 0.0018   | 0.000319 | 0.001857 |
| SPTB   | 2.186422 | 2.658171 | 0.008067 | 0.026365 | 0.007901 | 0.025915 |
| SPTBN1 | -0.73953 | -1.926   | 0.054577 | 0.120769 | 0.055498 | 0.12269  |
| SPTBN5 | 2.228091 | 2.819235 | 0.004973 | 0.017857 | 0.004866 | 0.017512 |
| SPTLC1 | 0.047683 | 0.117928 | 0.906164 | 0.943294 | 0.906445 | 0.943609 |
| SQSTM1 | -0.79285 | -2.00188 | 0.045749 | 0.104244 | 0.046466 | 0.105503 |
| SRC    | -1.46191 | -2.05137 | 0.040666 | 0.094889 | 0.040258 | 0.09423  |
| SRCAP  | -0.32962 | -0.6722  | 0.501714 | 0.63151  | 0.501986 | 0.631852 |
| SRD5A1 | 4.167778 | 4.17252  | 3.46E-05 | 0.000285 | 3.26E-05 | 0.000271 |
| SREBF1 | -0.68088 | -1.18132 | 0.237945 | 0.37179  | 0.237588 | 0.371725 |
| SREBF2 | -1.29615 | -4.85635 | 1.53E-06 | 2.09E-05 | 2.04E-06 | 2.68E-05 |
| SRF    | 1.587932 | 3.24453  | 0.001242 | 0.005669 | 0.001251 | 0.005702 |
| SRI    | -2.02204 | -3.82099 | 0.000147 | 0.000947 | 0.000147 | 0.000946 |
| SRM    | 0.931568 | 1.588432 | 0.112717 | 0.209977 | 0.112397 | 0.209546 |
| SRP14  | 0.704326 | 2.764293 | 0.00588  | 0.020473 | 0.006605 | 0.022415 |
| SRP54  | 1.416096 | 2.458942 | 0.014217 | 0.041019 | 0.014142 | 0.040904 |
| SRP68  | -0.57391 | -0.7959  | 0.426403 | 0.563582 | 0.425439 | 0.562623 |
| SRP72  | -0.70642 | -1.42226 | 0.155471 | 0.268251 | 0.155679 | 0.26851  |
| SRPK1  | 0.255586 | 0.388964 | 0.697441 | 0.796979 | 0.696979 | 0.796291 |
| SRPR   | 0.629402 | 1.09943  | 0.272023 | 0.410964 | 0.271681 | 0.410448 |
| SRPX   | -2.40114 | -3.0065  | 0.002754 | 0.011005 | 0.002686 | 0.01079  |
| SRPX2  | 1.979705 | 3.593481 | 0.000353 | 0.002017 | 0.000351 | 0.002012 |
| SRRM1  | -2.5758  | -5.64827 | 2.51E-08 | 5.86E-07 | 2.61E-08 | 6.08E-07 |
| SS18   | 0.417829 | 0.85863  | 0.390889 | 0.529904 | 0.391226 | 0.529903 |
| SSB    | -0.60096 | -1.67952 | 0.093573 | 0.181433 | 0.09523  | 0.183811 |
| SSBP2  | -1.74249 | -3.16631 | 0.001622 | 0.007107 | 0.001615 | 0.007054 |
| SSBP3  | 1.266485 | 3.350451 | 0.000858 | 0.004177 | 0.0009   | 0.004345 |
| SSFA2  | 0.859055 | 1.008363 | 0.313688 | 0.456101 | 0.312357 | 0.454795 |
| SSNA1  | 3.319948 | 4.625095 | 4.59E-06 | 5.25E-05 | 4.38E-06 | 5.01E-05 |
| SSPN   | 1.686406 | 3.125399 | 0.001862 | 0.007962 | 0.001856 | 0.007939 |
| SSR1   | -1.59071 | -3.98159 | 7.69E-05 | 0.000557 | 8.09E-05 | 0.000578 |
| SSR2   | -1.25594 | -4.48513 | 8.74E-06 | 8.93E-05 | 1.09E-05 | 0.000109 |
| SSR3   | -1.53313 | -4.04698 | 5.87E-05 | 0.000444 | 6.27E-05 | 0.000471 |

|        |          |          |          |          |          |          |
|--------|----------|----------|----------|----------|----------|----------|
| SSR4   | 0.917288 | 2.027587 | 0.043045 | 0.099173 | 0.043359 | 0.099944 |
| SSSCA1 | 0.94837  | 0.995966 | 0.319669 | 0.461581 | 0.318176 | 0.460131 |
| SST    | -1.64297 | -1.56099 | 0.119054 | 0.219298 | 0.117827 | 0.217513 |
| ST13   | -1.1184  | -2.37283 | 0.017968 | 0.049665 | 0.018086 | 0.049739 |
| ST5    | 0.760784 | 1.524906 | 0.127811 | 0.231399 | 0.127985 | 0.231714 |
| ST7    | 2.30147  | 3.671286 | 0.000263 | 0.00159  | 0.000258 | 0.001558 |
| ST7L   | 1.900579 | 3.417931 | 0.000674 | 0.003435 | 0.000669 | 0.00342  |
| STAG2  | 1.043766 | 2.218642 | 0.026886 | 0.067755 | 0.027047 | 0.068087 |
| STAM   | 0.575301 | 0.607143 | 0.543987 | 0.669891 | 0.542748 | 0.668562 |
| STAM2  | -0.98086 | -1.61736 | 0.106328 | 0.2007   | 0.105937 | 0.200023 |
| STAMPB | 3.875509 | 5.32151  | 1.46E-07 | 2.70E-06 | 1.37E-07 | 2.57E-06 |
| STAP2  | 2.115221 | 3.632775 | 0.000304 | 0.001778 | 0.000301 | 0.001778 |
| STARD3 | -1.07411 | -1.90338 | 0.057471 | 0.125693 | 0.057319 | 0.125594 |
| STARD7 | -0.1778  | -0.32191 | 0.747636 | 0.832206 | 0.74753  | 0.832568 |
| STAT1  | 1.588642 | 3.992042 | 7.37E-05 | 0.000538 | 7.76E-05 | 0.000558 |
| STAT2  | -1.18312 | -3.83268 | 0.00014  | 0.00091  | 0.000159 | 0.001013 |
| STAT3  | -1.64843 | -2.40694 | 0.016389 | 0.045888 | 0.016192 | 0.045433 |
| STAT4  | 3.028706 | 3.6187   | 0.000321 | 0.001866 | 0.000309 | 0.001815 |
| STAT5B | -1.73289 | -2.36271 | 0.018461 | 0.050453 | 0.018208 | 0.049986 |
| STAU2  | -0.0691  | -0.08105 | 0.935425 | 0.962456 | 0.935248 | 0.962273 |
| STIM1  | -0.21266 | -0.39933 | 0.689792 | 0.79151  | 0.689753 | 0.791272 |
| STIP1  | 4.663588 | 6.840329 | 1.96E-11 | 1.31E-09 | 1.79E-11 | 1.24E-09 |
| STK10  | 0.784313 | 0.910389 | 0.362984 | 0.502216 | 0.361646 | 0.501002 |
| STK16  | 0.81274  | 1.948484 | 0.051824 | 0.116043 | 0.052422 | 0.116935 |
| STK17A | -1.24552 | -2.03133 | 0.042663 | 0.098388 | 0.042415 | 0.097914 |
| STK17B | -0.45615 | -1.02461 | 0.30596  | 0.447701 | 0.306786 | 0.448351 |
| STK19  | -1.16023 | -1.94073 | 0.052761 | 0.11758  | 0.052518 | 0.117038 |
| STK24  | -0.13734 | -0.29471 | 0.768314 | 0.846981 | 0.768579 | 0.847032 |
| STK25  | -1.38012 | -3.50812 | 0.000485 | 0.0026   | 0.000507 | 0.002695 |
| STK3   | 0.169898 | 0.315453 | 0.752528 | 0.834314 | 0.752474 | 0.834274 |
| STK32B | -2.19926 | -4.02377 | 6.46E-05 | 0.000479 | 6.42E-05 | 0.00048  |
| STK33  | 2.663783 | 5.237581 | 2.26E-07 | 3.94E-06 | 2.27E-07 | 3.99E-06 |
| STK35  | -0.79491 | -1.52264 | 0.128378 | 0.232069 | 0.128392 | 0.232271 |
| STK38  | -0.51477 | -0.72572 | 0.468296 | 0.604237 | 0.467404 | 0.603561 |
| STK38L | -1.35814 | -2.12478 | 0.034015 | 0.082237 | 0.033755 | 0.081736 |
| STK39  | -0.7023  | -0.95532 | 0.339804 | 0.481193 | 0.338754 | 0.479996 |
| STK4   | -0.09844 | -0.2013  | 0.840535 | 0.8975   | 0.84064  | 0.897394 |
| STMN2  | 0.891342 | 1.775344 | 0.07635  | 0.155604 | 0.076465 | 0.155781 |
| STOM   | -0.9371  | -2.29781 | 0.021917 | 0.057805 | 0.022296 | 0.058609 |
| STOML1 | 1.597033 | 1.995026 | 0.046493 | 0.105514 | 0.045941 | 0.104563 |
| STRA13 | 0.61087  | 1.591971 | 0.11192  | 0.208822 | 0.113288 | 0.21079  |

|          |          |          |          |          |          |          |
|----------|----------|----------|----------|----------|----------|----------|
| STRAP    | -0.56507 | -1.37067 | 0.170992 | 0.288155 | 0.172156 | 0.290116 |
| STRN3    | 1.536904 | 2.796056 | 0.005339 | 0.01884  | 0.00532  | 0.018786 |
| STS      | -0.98316 | -1.04889 | 0.294653 | 0.436591 | 0.293183 | 0.435238 |
| STUB1    | 0.256777 | 0.44079  | 0.659524 | 0.767458 | 0.659257 | 0.767161 |
| STX11    | 0.873606 | 1.47488  | 0.140771 | 0.249105 | 0.14039  | 0.248447 |
| STX16    | -1.32274 | -2.64728 | 0.008328 | 0.026995 | 0.008356 | 0.027159 |
| STX1A    | -2.67772 | -2.64952 | 0.008274 | 0.026856 | 0.008067 | 0.026347 |
| STX6     | 1.195114 | 1.534425 | 0.125454 | 0.22801  | 0.12454  | 0.226611 |
| STX7     | 0.063651 | 0.110572 | 0.911993 | 0.946744 | 0.911927 | 0.946568 |
| STX8     | 1.232895 | 2.179911 | 0.029653 | 0.07343  | 0.02955  | 0.073214 |
| STXBP1   | -4.46792 | -5.94411 | 4.73E-09 | 1.38E-07 | 4.35E-09 | 1.32E-07 |
| STXBP2   | 0.036471 | 0.079895 | 0.936347 | 0.962983 | 0.936437 | 0.963075 |
| STXBP3   | 0.838659 | 1.717235 | 0.086454 | 0.170944 | 0.086664 | 0.171067 |
| SUCLA2   | 1.422865 | 2.366005 | 0.018299 | 0.050208 | 0.018175 | 0.049924 |
| SUCLG1   | 2.244674 | 6.862969 | 1.69E-11 | 1.19E-09 | 2.28E-11 | 1.51E-09 |
| SUGT1    | 2.685943 | 3.900836 | 0.000107 | 0.000726 | 0.000104 | 0.000707 |
| SULT1A1  | 1.209712 | 1.716469 | 0.086594 | 0.171149 | 0.085972 | 0.169966 |
| SULT1E1  | 0.748674 | 1.004418 | 0.315583 | 0.457545 | 0.314501 | 0.456362 |
| SULT2B1  | 0.022187 | 0.034541 | 0.972457 | 0.982024 | 0.972416 | 0.982028 |
| SUMO1    | -0.27694 | -0.8435  | 0.399284 | 0.537564 | 0.402489 | 0.539869 |
| SUMO2    | 1.325523 | 5.164222 | 3.29E-07 | 5.51E-06 | 4.71E-07 | 7.56E-06 |
| SUMO3    | -0.13061 | -0.13425 | 0.89325  | 0.93378  | 0.892916 | 0.933822 |
| SUOX     | -0.76475 | -1.00107 | 0.317197 | 0.459565 | 0.316064 | 0.458064 |
| SUPT16H  | -3.02152 | -4.05759 | 5.62E-05 | 0.000427 | 5.40E-05 | 0.000414 |
| SUPT3H   | 0.271916 | 0.526319 | 0.598862 | 0.716709 | 0.598911 | 0.716583 |
| SUPT4H1  | -2.06305 | -2.05809 | 0.040014 | 0.093752 | 0.039377 | 0.092674 |
| SUPT6H   | 0.864649 | 1.166104 | 0.244037 | 0.378665 | 0.242994 | 0.377295 |
| SUPV3L1  | 0.9053   | 0.991245 | 0.321967 | 0.464043 | 0.32053  | 0.462867 |
| SURF1    | -1.01819 | -1.44047 | 0.150258 | 0.261657 | 0.149447 | 0.260341 |
| SURF2    | 3.004252 | 7.121318 | 3.08E-12 | 2.73E-10 | 3.42E-12 | 3.09E-10 |
| SUV420H1 | 1.173206 | 2.27985  | 0.022968 | 0.059837 | 0.022989 | 0.059949 |
| SVIL     | -1.47351 | -2.27254 | 0.023408 | 0.06075  | 0.023195 | 0.060364 |
| SWAP70   | -0.77122 | -0.94943 | 0.342786 | 0.485123 | 0.34154  | 0.483651 |
| SYAP1    | 0.195138 | 0.584612 | 0.559029 | 0.682877 | 0.561557 | 0.68536  |
| SYCP2    | -0.05727 | -0.09285 | 0.926052 | 0.955709 | 0.925962 | 0.955648 |
| SYK      | 0.052764 | 0.061963 | 0.950613 | 0.9708   | 0.950477 | 0.970718 |
| SYN1     | 1.073025 | 1.319628 | 0.187464 | 0.308718 | 0.186324 | 0.306948 |
| SYN2     | 2.802464 | 5.976237 | 3.92E-09 | 1.21E-07 | 4.06E-09 | 1.26E-07 |
| SYN3     | -1.66385 | -2.72709 | 0.006577 | 0.022335 | 0.006514 | 0.022185 |
| SYNE1    | 0.913035 | 1.940274 | 0.052816 | 0.117647 | 0.053066 | 0.118037 |
| SYNE2    | 0.590161 | 1.036879 | 0.300212 | 0.441764 | 0.299888 | 0.44198  |

|         |          |          |          |          |          |          |
|---------|----------|----------|----------|----------|----------|----------|
| SYNGR1  | -2.24964 | -3.17805 | 0.001559 | 0.006862 | 0.001525 | 0.006725 |
| SYNGR3  | -0.46483 | -0.48055 | 0.631011 | 0.743482 | 0.629941 | 0.742408 |
| SYNGR4  | 2.342716 | 3.447975 | 0.000604 | 0.003136 | 0.000591 | 0.003072 |
| SYNJ1   | 0.290524 | 0.414574 | 0.678602 | 0.782236 | 0.678011 | 0.781638 |
| SYNJ2BP | 2.24606  | 8.572325 | 8.67E-17 | 2.00E-14 | 2.01E-16 | 3.96E-14 |
| SYNPO   | -0.78275 | -2.18055 | 0.029606 | 0.073351 | 0.03042  | 0.07493  |
| SYP     | 1.80471  | 2.067316 | 0.039134 | 0.092334 | 0.038581 | 0.091166 |
| SYT1    | -0.86368 | -1.03489 | 0.30114  | 0.442437 | 0.299844 | 0.44198  |
| SYT13   | 3.370478 | 3.245374 | 0.001238 | 0.005668 | 0.001193 | 0.005501 |
| SYT7    | 2.328173 | 4.277356 | 2.20E-05 | 0.000197 | 2.19E-05 | 0.000195 |
| SYTL1   | -0.46118 | -0.64677 | 0.518029 | 0.647746 | 0.517179 | 0.646931 |
| SYTL2   | -0.72727 | -1.3031  | 0.193042 | 0.314706 | 0.19281  | 0.314673 |
| TACC1   | -0.17789 | -0.41672 | 0.677033 | 0.781064 | 0.677717 | 0.781638 |
| TACR2   | 2.084747 | 2.45899  | 0.014215 | 0.041019 | 0.013951 | 0.040451 |
| TAF1    | 0.246107 | 0.646385 | 0.518278 | 0.647746 | 0.519928 | 0.648703 |
| TAF10   | -0.39253 | -1.04894 | 0.294631 | 0.436591 | 0.296677 | 0.438485 |
| TAF11   | -2.24089 | -4.1607  | 3.64E-05 | 0.000297 | 3.62E-05 | 0.000298 |
| TAF15   | 0.309482 | 1.02366  | 0.30641  | 0.448119 | 0.310663 | 0.452889 |
| TAF1A   | 0.811861 | 1.907638 | 0.056917 | 0.12481  | 0.057481 | 0.125773 |
| TAF1B   | 0.509418 | 1.318553 | 0.187823 | 0.309201 | 0.189459 | 0.310906 |
| TAF1C   | -1.4552  | -2.90618 | 0.003794 | 0.014277 | 0.003808 | 0.014353 |
| TAF2    | 0.306807 | 0.683989 | 0.494247 | 0.625969 | 0.494946 | 0.62702  |
| TAF5    | -0.90352 | -2.22029 | 0.026773 | 0.067508 | 0.027215 | 0.068437 |
| TAF5L   | 0.00769  | 0.014082 | 0.988769 | 0.992561 | 0.988765 | 0.992529 |
| TAF6L   | -0.80053 | -2.96849 | 0.003112 | 0.01214  | 0.003488 | 0.013428 |
| TAF7    | 0.527141 | 1.028947 | 0.30392  | 0.445595 | 0.304022 | 0.445697 |
| TAGLN   | -0.4698  | -0.94379 | 0.345657 | 0.487112 | 0.345891 | 0.487348 |
| TAGLN2  | -1.48035 | -4.03145 | 6.26E-05 | 0.000467 | 6.75E-05 | 0.0005   |
| TALDO1  | 0.17649  | 0.222862 | 0.823719 | 0.885112 | 0.823288 | 0.884649 |
| TANK    | 0.614625 | 1.604752 | 0.109076 | 0.204736 | 0.110439 | 0.206551 |
| TAOK1   | 0.432655 | 0.430471 | 0.667009 | 0.773677 | 0.665998 | 0.772696 |
| TAOK2   | 1.728057 | 3.647432 | 0.000288 | 0.001705 | 0.000292 | 0.001738 |
| TAP1    | 2.534739 | 4.654009 | 4.01E-06 | 4.68E-05 | 3.98E-06 | 4.62E-05 |
| TAP2    | 1.109376 | 1.841283 | 0.066075 | 0.138888 | 0.065783 | 0.138609 |
| TARBP1  | 0.114093 | 0.143084 | 0.886272 | 0.929379 | 0.885988 | 0.929082 |
| TARBP2  | -0.0827  | -0.16386 | 0.869894 | 0.918145 | 0.86994  | 0.918194 |
| TARDBP  | -0.96134 | -3.66816 | 0.000266 | 0.001607 | 0.000319 | 0.001857 |
| TARP    | -1.29769 | -3.214   | 0.001379 | 0.006222 | 0.001426 | 0.006387 |
| TARS    | 1.575337 | 3.707345 | 0.000229 | 0.001408 | 0.000236 | 0.001451 |
| TAX1BP1 | 1.399621 | 4.11431  | 4.43E-05 | 0.000352 | 4.91E-05 | 0.000381 |
| TAX1BP3 | -0.11986 | -0.22967 | 0.818423 | 0.882244 | 0.818431 | 0.882192 |



|          |          |          |          |          |          |          |
|----------|----------|----------|----------|----------|----------|----------|
| TAZ      | -0.05954 | -0.06739 | 0.946294 | 0.96855  | 0.94614  | 0.968393 |
| TBC1D16  | 1.601314 | 4.294586 | 2.04E-05 | 0.000183 | 2.21E-05 | 0.000197 |
| TBC1D22A | 1.219194 | 2.192353 | 0.028739 | 0.071656 | 0.028659 | 0.071456 |
| TBC1D5   | 0.089361 | 0.199598 | 0.841863 | 0.897835 | 0.84212  | 0.897704 |
| TBCA     | -1.30116 | -4.49845 | 8.23E-06 | 8.46E-05 | 1.01E-05 | 0.000102 |
| TBCD     | 0.849355 | 1.327407 | 0.184881 | 0.305749 | 0.184242 | 0.304801 |
| TBCE     | 1.078146 | 2.354596 | 0.018865 | 0.051312 | 0.019026 | 0.051661 |
| TBL1X    | 2.315819 | 6.380999 | 3.53E-10 | 1.36E-08 | 4.23E-10 | 1.59E-08 |
| TBP      | 1.39372  | 1.711412 | 0.087524 | 0.172431 | 0.086704 | 0.171067 |
| TBPL1    | -0.61869 | -0.95652 | 0.339196 | 0.480486 | 0.338463 | 0.479728 |
| TBRG4    | -2.1081  | -2.83261 | 0.004773 | 0.017264 | 0.004679 | 0.016943 |
| TBX1     | 0.307832 | 0.57408  | 0.56613  | 0.688595 | 0.566056 | 0.688525 |
| TBX19    | 0.858413 | 0.874005 | 0.382466 | 0.521041 | 0.380958 | 0.519438 |
| TBX3     | -2.20185 | -4.19498 | 3.14E-05 | 0.000263 | 3.14E-05 | 0.000263 |
| TBXA2R   | -0.31642 | -0.45541 | 0.648977 | 0.757896 | 0.648353 | 0.757271 |
| TBXAS1   | -0.47231 | -0.50466 | 0.613981 | 0.729636 | 0.612903 | 0.728908 |
| TCEA1    | -1.23493 | -2.49762 | 0.012771 | 0.037599 | 0.012818 | 0.037747 |
| TCEA2    | -0.09757 | -0.21282 | 0.831541 | 0.891275 | 0.831767 | 0.891161 |
| TCEA3    | 1.058716 | 1.547402 | 0.122295 | 0.224176 | 0.121613 | 0.223099 |
| TCEAL1   | 0.562374 | 1.327478 | 0.184857 | 0.305749 | 0.185886 | 0.306441 |
| TCEAL2   | -2.28479 | -2.6321  | 0.008705 | 0.027928 | 0.008517 | 0.027518 |
| TCEAL3   | -0.18096 | -0.3266  | 0.744087 | 0.831283 | 0.743974 | 0.830883 |
| TCEAL8   | -1.10566 | -2.36244 | 0.018474 | 0.050453 | 0.018604 | 0.050748 |
| TCEB2    | 0.107318 | 0.187721 | 0.851159 | 0.905078 | 0.851056 | 0.904969 |
| TCEB3    | 0.866752 | 1.038231 | 0.299582 | 0.44139  | 0.298286 | 0.440402 |
| TCERG1   | -0.05323 | -0.15349 | 0.878065 | 0.924073 | 0.878748 | 0.924377 |
| TCF12    | -0.7863  | -1.32448 | 0.185851 | 0.30703  | 0.185423 | 0.305892 |
| TCF15    | 0.208169 | 0.272009 | 0.785709 | 0.858377 | 0.785218 | 0.858262 |
| TCF20    | 0.608695 | 1.145587 | 0.252424 | 0.389492 | 0.252369 | 0.38905  |
| TCF3     | 2.461415 | 3.606047 | 0.000337 | 0.001943 | 0.000328 | 0.001892 |
| TCF4     | 1.307636 | 2.979984 | 0.003    | 0.011788 | 0.003054 | 0.012    |
| TCF7     | -1.7412  | -3.92127 | 9.83E-05 | 0.000677 | 0.000101 | 0.000695 |
| TCF7L2   | 0.611214 | 1.546583 | 0.122493 | 0.224451 | 0.123744 | 0.2256   |
| TCIRG1   | -1.35246 | -3.52338 | 0.000459 | 0.002489 | 0.000482 | 0.002587 |
| TCL6     | -1.97459 | -1.95786 | 0.050711 | 0.113713 | 0.049967 | 0.112312 |
| TCN1     | 0.851006 | 0.713028 | 0.476106 | 0.610559 | 0.474528 | 0.609366 |
| TCN2     | 0.730591 | 1.215162 | 0.224784 | 0.355953 | 0.224293 | 0.35542  |
| TCOF1    | 2.082023 | 3.100258 | 0.002024 | 0.008511 | 0.001988 | 0.008403 |
| TDP1     | 0.15874  | 0.249099 | 0.80337  | 0.87041  | 0.803095 | 0.870313 |
| TDRD7    | 0.949315 | 2.538538 | 0.011384 | 0.034386 | 0.011734 | 0.035239 |
| TDRD9    | -1.68767 | -2.60149 | 0.009512 | 0.029903 | 0.009401 | 0.029596 |

|           |          |          |          |          |          |          |
|-----------|----------|----------|----------|----------|----------|----------|
| TEAD1     | -2.63857 | -5.36289 | 1.17E-07 | 2.23E-06 | 1.19E-07 | 2.30E-06 |
| TEAD2     | 1.514888 | 2.287532 | 0.022513 | 0.05885  | 0.02229  | 0.058609 |
| TEAD4     | 1.074286 | 2.28174  | 0.022855 | 0.059578 | 0.022997 | 0.059949 |
| TEK       | 0.391481 | 0.546577 | 0.584873 | 0.704486 | 0.584102 | 0.703557 |
| TERF2     | -0.99659 | -1.3232  | 0.186273 | 0.307295 | 0.185269 | 0.305892 |
| TERF2IP   | 0.299542 | 0.706496 | 0.480155 | 0.613819 | 0.48118  | 0.614551 |
| TESK1     | 3.53203  | 3.926463 | 9.62E-05 | 0.000666 | 9.18E-05 | 0.000642 |
| TESK2     | 0.583994 | 1.117688 | 0.264149 | 0.402692 | 0.264164 | 0.402489 |
| TEX264    | 0.884936 | 1.251259 | 0.211329 | 0.337724 | 0.210419 | 0.336614 |
| TFAM      | 1.456399 | 1.828933 | 0.067908 | 0.14192  | 0.067218 | 0.140865 |
| TFAP2A    | 0.776135 | 1.314273 | 0.189258 | 0.310584 | 0.188844 | 0.310337 |
| TFB1M     | -1.64811 | -2.29936 | 0.021828 | 0.057604 | 0.021557 | 0.057144 |
| TFCP2     | -1.96682 | -2.62289 | 0.008941 | 0.028509 | 0.008786 | 0.028074 |
| TFCP2L1   | 1.843976 | 1.909988 | 0.056613 | 0.12457  | 0.055843 | 0.123338 |
| TFE3      | -0.28482 | -0.62813 | 0.530162 | 0.658325 | 0.530775 | 0.658738 |
| TFF1      | 1.726631 | 1.859039 | 0.063513 | 0.13522  | 0.062716 | 0.134045 |
| TFF3      | 1.570536 | 1.693269 | 0.090925 | 0.177765 | 0.089953 | 0.176232 |
| TFG       | 0.216233 | 0.517527 | 0.60498  | 0.721676 | 0.605895 | 0.722585 |
| TFIP11    | 1.814917 | 3.029891 | 0.002552 | 0.010385 | 0.002525 | 0.010309 |
| TFPI      | 3.133442 | 4.105149 | 4.60E-05 | 0.000362 | 4.42E-05 | 0.000352 |
| TFPT      | -2.32265 | -3.89014 | 0.000111 | 0.000752 | 0.00011  | 0.000739 |
| TFR2      | 1.344601 | 1.269097 | 0.2049   | 0.330031 | 0.203386 | 0.328461 |
| TGDS      | 0.277678 | 0.520113 | 0.603177 | 0.72054  | 0.603122 | 0.720191 |
| TGFA      | 1.567563 | 2.352188 | 0.018987 | 0.051612 | 0.018785 | 0.051182 |
| TGFB1I1   | -0.43376 | -0.91426 | 0.360947 | 0.500723 | 0.361417 | 0.501002 |
| TGFB2     | -0.89771 | -1.26742 | 0.2055   | 0.330544 | 0.204594 | 0.329537 |
| TGFB1     | 0.261907 | 0.493212 | 0.622044 | 0.735683 | 0.622006 | 0.735488 |
| TGFB1R1   | -0.01116 | -0.03047 | 0.975698 | 0.98344  | 0.975811 | 0.983553 |
| TGFB1R2   | 0.873025 | 1.512868 | 0.130842 | 0.23526  | 0.130544 | 0.235169 |
| TGFB1R3   | 0.021864 | 0.040026 | 0.968086 | 0.979947 | 0.968075 | 0.979949 |
| TGFB1RAP1 | -1.02707 | -1.32826 | 0.184598 | 0.305615 | 0.183548 | 0.304081 |
| TGIF2     | 0.21104  | 0.465613 | 0.641662 | 0.751898 | 0.642161 | 0.751968 |
| TGM1      | -0.4006  | -0.66897 | 0.503772 | 0.633421 | 0.503332 | 0.633038 |
| TGM2      | 0.530501 | 1.269177 | 0.204872 | 0.330031 | 0.206016 | 0.33126  |
| TGM3      | 3.167661 | 3.826658 | 0.000144 | 0.000928 | 0.000138 | 0.000901 |
| TH        | 1.547982 | 1.770351 | 0.077178 | 0.156863 | 0.076341 | 0.155595 |
| THAP1     | 1.774828 | 2.750468 | 0.006131 | 0.021082 | 0.006054 | 0.020922 |
| THAP11    | -0.41482 | -0.54762 | 0.584157 | 0.703985 | 0.58329  | 0.702845 |
| THAP4     | 1.734894 | 2.14807  | 0.032109 | 0.078738 | 0.03167  | 0.077727 |
| THAP8     | 1.101177 | 2.229041 | 0.026182 | 0.066301 | 0.026263 | 0.066507 |
| THBD      | 0.90672  | 1.480637 | 0.13923  | 0.246843 | 0.138763 | 0.246494 |

|          |          |          |          |          |          |          |
|----------|----------|----------|----------|----------|----------|----------|
| THBS1    | -0.56777 | -0.93685 | 0.349215 | 0.489067 | 0.348679 | 0.48848  |
| THBS2    | 1.797892 | 2.675388 | 0.007669 | 0.025347 | 0.007563 | 0.025086 |
| THBS3    | 0.491712 | 1.515928 | 0.130066 | 0.234398 | 0.132791 | 0.238759 |
| THBS4    | 0.756946 | 0.792466 | 0.428403 | 0.565112 | 0.426973 | 0.5641   |
| THOC1    | 1.064732 | 1.74679  | 0.081187 | 0.163347 | 0.080836 | 0.162433 |
| THOP1    | -0.74591 | -1.17293 | 0.24129  | 0.375394 | 0.240624 | 0.374605 |
| THRAP3   | 0.548894 | 1.468678 | 0.142446 | 0.251259 | 0.144147 | 0.253837 |
| THUMPD3  | 0.243991 | 0.35155  | 0.7253   | 0.817288 | 0.724799 | 0.81692  |
| TIAM1    | 2.713384 | 2.963822 | 0.003159 | 0.012313 | 0.00307  | 0.012035 |
| TIE1     | 1.47461  | 3.382667 | 0.000765 | 0.0038   | 0.000783 | 0.003881 |
| TIFA     | 0.59673  | 0.886588 | 0.375657 | 0.514951 | 0.374827 | 0.513911 |
| TIMELESS | -0.7747  | -1.65932 | 0.097576 | 0.187264 | 0.09796  | 0.187956 |
| TIMM10   | 0.949476 | 1.341697 | 0.180203 | 0.300191 | 0.179334 | 0.299209 |
| TIMM17A  | -0.62372 | -1.85326 | 0.064338 | 0.136457 | 0.066016 | 0.138825 |
| TIMM44   | -0.4693  | -0.4656  | 0.641673 | 0.751898 | 0.640595 | 0.751009 |
| TIMM8B   | 1.167544 | 3.642093 | 0.000294 | 0.001731 | 0.000325 | 0.001883 |
| TIMP1    | -3.0321  | -6.45024 | 2.31E-10 | 9.85E-09 | 2.39E-10 | 1.04E-08 |
| TIMP2    | -0.64214 | -1.68287 | 0.092923 | 0.180619 | 0.0942   | 0.182348 |
| TIMP3    | -1.00025 | -1.55358 | 0.120814 | 0.221893 | 0.12026  | 0.220818 |
| TINAG    | 3.387211 | 5.757516 | 1.37E-08 | 3.41E-07 | 1.32E-08 | 3.32E-07 |
| TJP1     | 1.255592 | 2.503582 | 0.01256  | 0.037173 | 0.012594 | 0.037252 |
| TJP2     | -0.82598 | -1.16963 | 0.242616 | 0.376957 | 0.241681 | 0.375752 |
| TK2      | 0.80261  | 1.064218 | 0.28766  | 0.429479 | 0.286558 | 0.428106 |
| TKT      | -0.23776 | -0.44104 | 0.659344 | 0.767438 | 0.659269 | 0.767161 |
| TKTL1    | -1.58213 | -1.65596 | 0.098255 | 0.188335 | 0.097216 | 0.186877 |
| TLE1     | 3.041454 | 8.66299  | 4.29E-17 | 1.12E-14 | 6.06E-17 | 1.58E-14 |
| TLE2     | -1.25618 | -2.01924 | 0.043908 | 0.100865 | 0.043636 | 0.100337 |
| TLE3     | 0.265068 | 0.526269 | 0.598896 | 0.716709 | 0.599033 | 0.716583 |
| TLE4     | 0.461982 | 0.945733 | 0.344667 | 0.486905 | 0.344991 | 0.4873   |
| TLE6     | 0.427292 | 0.994331 | 0.320464 | 0.462444 | 0.321507 | 0.463712 |
| TLK1     | 0.080144 | 0.2454   | 0.806231 | 0.872504 | 0.807543 | 0.873723 |
| TLK2     | -1.14442 | -2.65196 | 0.008215 | 0.02672  | 0.008348 | 0.027154 |
| TLN1     | -0.43489 | -1.26315 | 0.207028 | 0.332774 | 0.209662 | 0.336088 |
| TLR1     | 1.604291 | 4.670386 | 3.72E-06 | 4.39E-05 | 4.21E-06 | 4.84E-05 |
| TLR10    | 0.214056 | 0.480596 | 0.63098  | 0.743482 | 0.631562 | 0.743759 |
| TLR3     | -0.79847 | -1.41943 | 0.156294 | 0.269077 | 0.156053 | 0.26863  |
| TLR5     | 1.381554 | 1.897941 | 0.058185 | 0.126821 | 0.05765  | 0.125951 |
| TM4SF1   | 0.361688 | 0.71277  | 0.476266 | 0.610598 | 0.476399 | 0.610748 |
| TM4SF4   | -0.13246 | -0.12517 | 0.900432 | 0.939825 | 0.900101 | 0.939479 |
| TM4SF5   | -1.99135 | -2.42321 | 0.01568  | 0.044315 | 0.015408 | 0.043783 |
| TM7SF2   | 1.170042 | 1.657293 | 0.097985 | 0.187971 | 0.097318 | 0.186998 |

|           |          |          |          |          |          |          |
|-----------|----------|----------|----------|----------|----------|----------|
| TM7SF3    | 0.731126 | 1.474433 | 0.140891 | 0.249224 | 0.141097 | 0.249494 |
| TM9SF1    | -0.68734 | -0.84572 | 0.398046 | 0.53682  | 0.396826 | 0.535041 |
| TM9SF2    | -0.31219 | -0.84159 | 0.400353 | 0.53854  | 0.402421 | 0.539869 |
| TMC4      | 3.404395 | 5.171006 | 3.18E-07 | 5.34E-06 | 3.04E-07 | 5.14E-06 |
| TMCC1     | 0.65323  | 1.008256 | 0.313739 | 0.456101 | 0.313001 | 0.45531  |
| TMED3     | -0.80064 | -2.49967 | 0.012698 | 0.037478 | 0.013362 | 0.039104 |
| TMED5     | 0.497557 | 0.73166  | 0.464663 | 0.601132 | 0.463862 | 0.600096 |
| TMED9     | 0.259594 | 0.368792 | 0.712413 | 0.806829 | 0.711872 | 0.806411 |
| TMEM18    | -0.54284 | -0.85895 | 0.390714 | 0.52982  | 0.390061 | 0.528938 |
| TMEM25    | -0.93772 | -0.99469 | 0.320292 | 0.462338 | 0.318811 | 0.460908 |
| TMEM37    | 0.69855  | 0.719187 | 0.472307 | 0.606846 | 0.470916 | 0.605691 |
| TMEM38A   | -2.08696 | -3.85679 | 0.000127 | 0.000841 | 0.000127 | 0.000837 |
| TMEM38B   | 0.455345 | 1.006068 | 0.31479  | 0.45698  | 0.31552  | 0.457417 |
| TMF1      | 2.20531  | 3.799656 | 0.00016  | 0.001019 | 0.000158 | 0.00101  |
| TMOD3     | 0.525036 | 1.167544 | 0.243456 | 0.377887 | 0.244203 | 0.378815 |
| TMPO      | 0.475748 | 0.850599 | 0.395332 | 0.533926 | 0.39508  | 0.533585 |
| TMPRSS2   | 1.519592 | 1.436403 | 0.151411 | 0.262908 | 0.150045 | 0.260997 |
| TMPRSS4   | 1.966902 | 2.871815 | 0.004226 | 0.015517 | 0.004156 | 0.015332 |
| TNC       | 0.380075 | 0.706957 | 0.479869 | 0.613819 | 0.479775 | 0.613552 |
| TNFAIP1   | 0.411343 | 0.454551 | 0.649597 | 0.758347 | 0.648634 | 0.757412 |
| TNFAIP2   | 3.818012 | 6.905376 | 1.28E-11 | 9.42E-10 | 1.25E-11 | 9.15E-10 |
| TNFAIP3   | 1.473972 | 3.115965 | 0.001921 | 0.00815  | 0.001941 | 0.008233 |
| TNFAIP8   | 0.790714 | 1.14223  | 0.253816 | 0.390742 | 0.25292  | 0.389618 |
| TNFRSF10B | -1.07736 | -1.73944 | 0.082472 | 0.164884 | 0.082086 | 0.164211 |
| TNFRSF11B | -0.42114 | -0.39377 | 0.693888 | 0.79427  | 0.692908 | 0.793771 |
| TNFRSF12A | 0.257664 | 0.445029 | 0.65646  | 0.765029 | 0.656205 | 0.764732 |
| TNFRSF14  | -1.08586 | -3.65919 | 0.000275 | 0.001644 | 0.000313 | 0.001832 |
| TNFRSF19  | -0.76038 | -0.82247 | 0.411136 | 0.54896  | 0.40973  | 0.547549 |
| TNFRSF1B  | -0.38251 | -1.03952 | 0.298983 | 0.441055 | 0.301173 | 0.442625 |
| TNFRSF21  | 1.091078 | 2.739795 | 0.006331 | 0.021689 | 0.0065   | 0.022154 |
| TNFSF10   | 2.2239   | 3.292046 | 0.001053 | 0.004955 | 0.001032 | 0.004873 |
| TNFSF11   | 2.025114 | 4.265542 | 2.32E-05 | 0.000205 | 2.36E-05 | 0.000208 |
| TNFSF13   | 2.004018 | 2.38923  | 0.017193 | 0.04785  | 0.016894 | 0.047125 |
| TNFSF13B  | 3.484076 | 8.495149 | 1.57E-16 | 3.08E-14 | 1.86E-16 | 3.96E-14 |
| TNIP1     | 0.691526 | 1.112243 | 0.266481 | 0.405326 | 0.26587  | 0.404267 |
| TNIP2     | 1.101074 | 2.494679 | 0.012876 | 0.037823 | 0.013037 | 0.038321 |
| TNK2      | 0.143604 | 0.291354 | 0.770881 | 0.848063 | 0.771012 | 0.848258 |
| TNKS      | 1.237405 | 1.608671 | 0.108216 | 0.203365 | 0.107381 | 0.202147 |
| TNNI2     | 1.527551 | 1.513551 | 0.130668 | 0.235123 | 0.129426 | 0.233872 |
| TNNI3     | 1.608989 | 3.917066 | 1.00E-04 | 0.000687 | 0.000104 | 0.000711 |
| TNNT2     | 1.737408 | 3.916786 | 0.0001   | 0.000687 | 0.000103 | 0.000703 |

|          |          |          |          |          |          |          |
|----------|----------|----------|----------|----------|----------|----------|
| TNNT3    | -0.90209 | -1.37866 | 0.168515 | 0.28515  | 0.167841 | 0.284272 |
| TNPO1    | 3.153664 | 3.883155 | 0.000115 | 0.000771 | 0.00011  | 0.000741 |
| TNPO2    | 0.416336 | 1.588674 | 0.112662 | 0.209958 | 0.11741  | 0.216912 |
| TNRC6B   | -2.69232 | -4.74292 | 2.64E-06 | 3.26E-05 | 2.59E-06 | 3.24E-05 |
| TNRC6C   | -1.58871 | -1.90507 | 0.057251 | 0.125328 | 0.056586 | 0.124277 |
| TOB1     | -1.58444 | -2.2445  | 0.025165 | 0.06442  | 0.024876 | 0.063766 |
| TOM1     | 1.469011 | 6.313907 | 5.31E-10 | 1.95E-08 | 1.03E-09 | 3.61E-08 |
| TOMM34   | -0.56008 | -0.85678 | 0.391908 | 0.530673 | 0.391161 | 0.529903 |
| TOMM40   | 1.492528 | 3.757102 | 0.000189 | 0.001189 | 0.000198 | 0.001241 |
| TOMM70A  | 1.638418 | 5.150916 | 3.52E-07 | 5.79E-06 | 4.28E-07 | 6.96E-06 |
| TOP2A    | 2.229516 | 2.612776 | 0.009207 | 0.029139 | 0.009015 | 0.028626 |
| TOP2B    | -0.1847  | -0.62376 | 0.533026 | 0.660311 | 0.536845 | 0.663993 |
| TOP3A    | -1.16205 | -4.81717 | 1.85E-06 | 2.45E-05 | 2.67E-06 | 3.32E-05 |
| TOP3B    | 0.336345 | 0.63611  | 0.524948 | 0.653999 | 0.524919 | 0.654061 |
| TOPBP1   | 0.234233 | 0.489375 | 0.624756 | 0.738148 | 0.625063 | 0.73851  |
| TOR1A    | -0.52768 | -1.08074 | 0.280248 | 0.420282 | 0.280573 | 0.420636 |
| TOR1B    | -0.62325 | -0.63053 | 0.528591 | 0.657243 | 0.527278 | 0.656216 |
| TOX      | -3.24576 | -3.66799 | 0.000266 | 0.001607 | 0.000256 | 0.001546 |
| TP53BP1  | -2.90337 | -3.9787  | 7.78E-05 | 0.000561 | 7.51E-05 | 0.000544 |
| TP53I3   | 2.188953 | 3.562102 | 0.000397 | 0.002212 | 0.000391 | 0.002191 |
| TP53INP1 | -1.30634 | -2.00388 | 0.045533 | 0.103836 | 0.045195 | 0.103065 |
| TPD52L2  | -0.42461 | -1.31453 | 0.189172 | 0.310584 | 0.19235  | 0.314122 |
| TPI1     | -1.70526 | -5.89142 | 6.39E-09 | 1.78E-07 | 8.89E-09 | 2.40E-07 |
| TPM1     | 0.023389 | 0.058444 | 0.953414 | 0.972661 | 0.953561 | 0.97274  |
| TPM2     | -0.10809 | -0.23037 | 0.81788  | 0.882244 | 0.818077 | 0.882192 |
| TPMT     | 1.134364 | 1.104221 | 0.269941 | 0.408212 | 0.268373 | 0.406649 |
| TPP1     | -0.2719  | -0.71344 | 0.475849 | 0.610396 | 0.477582 | 0.611617 |
| TPP2     | 0.249681 | 0.787735 | 0.431164 | 0.567566 | 0.434668 | 0.570176 |
| TPR      | -2.22411 | -2.98455 | 0.002956 | 0.011655 | 0.002892 | 0.011481 |
| TPSAB1   | 2.759561 | 3.802072 | 0.000158 | 0.001012 | 0.000153 | 0.000986 |
| TPSG1    | -2.02161 | -1.84748 | 0.065171 | 0.137753 | 0.064257 | 0.136161 |
| TPST2    | 2.239461 | 2.89381  | 0.003945 | 0.014691 | 0.003859 | 0.014474 |
| TPX2     | -0.01922 | -0.02888 | 0.976972 | 0.984302 | 0.976934 | 0.984263 |
| TRA2A    | 1.342498 | 1.921232 | 0.055178 | 0.121925 | 0.054707 | 0.121041 |
| TRAF1    | 0.008515 | 0.026876 | 0.978567 | 0.985487 | 0.97873  | 0.985651 |
| TRAF3    | 1.989673 | 3.550294 | 0.000415 | 0.002292 | 0.000412 | 0.002291 |
| TRAF4    | 1.484785 | 2.542894 | 0.011245 | 0.034053 | 0.011174 | 0.033839 |
| TRAF5    | -0.05136 | -0.07239 | 0.942318 | 0.966164 | 0.942202 | 0.966045 |
| TRAF6    | -0.33638 | -0.56398 | 0.572977 | 0.695325 | 0.572593 | 0.694858 |
| TRAF7    | -0.21239 | -0.4347  | 0.663938 | 0.771067 | 0.66415  | 0.771314 |
| TRAM1    | -0.77126 | -1.00791 | 0.313905 | 0.456132 | 0.312769 | 0.455113 |

|          |          |          |          |          |          |          |
|----------|----------|----------|----------|----------|----------|----------|
| TRAP1    | -1.20575 | -1.6035  | 0.109352 | 0.205025 | 0.108546 | 0.203904 |
| TRAPPC3  | 0.580819 | 1.452199 | 0.146971 | 0.257171 | 0.14825  | 0.258735 |
| TRAPPC4  | -3.01865 | -4.56581 | 6.04E-06 | 6.62E-05 | 5.83E-06 | 6.43E-05 |
| TRAPPC6B | -1.26905 | -2.26802 | 0.023684 | 0.061431 | 0.023607 | 0.06115  |
| TREH     | 2.54327  | 6.960138 | 8.96E-12 | 7.02E-10 | 1.10E-11 | 8.34E-10 |
| TRERF1   | -0.78544 | -0.94446 | 0.345316 | 0.487112 | 0.344029 | 0.486518 |
| TRIB1    | 0.863598 | 1.353853 | 0.176295 | 0.295607 | 0.175674 | 0.294685 |
| TRIB2    | -3.59568 | -5.94328 | 4.75E-09 | 1.38E-07 | 4.55E-09 | 1.36E-07 |
| TRIM10   | 1.286532 | 2.100665 | 0.036088 | 0.086143 | 0.035868 | 0.085703 |
| TRIM16   | 5.991339 | 7.730071 | 4.57E-14 | 5.97E-12 | 3.96E-14 | 5.31E-12 |
| TRIM21   | 0.583524 | 0.734531 | 0.462913 | 0.599199 | 0.461795 | 0.597917 |
| TRIM22   | 0.492941 | 0.700982 | 0.483587 | 0.616452 | 0.482728 | 0.615946 |
| TRIM23   | 1.485686 | 1.936981 | 0.053218 | 0.118207 | 0.052658 | 0.117239 |
| TRIM26   | 1.350605 | 3.648704 | 0.000287 | 0.001699 | 0.000305 | 0.001798 |
| TRIM28   | 0.407079 | 1.011241 | 0.31231  | 0.454586 | 0.313794 | 0.45604  |
| TRIM29   | 1.341563 | 1.449964 | 0.147593 | 0.258164 | 0.146377 | 0.256642 |
| TRIM3    | -0.69017 | -1.76747 | 0.077659 | 0.15753  | 0.078708 | 0.159314 |
| TRIM31   | -0.91339 | -1.85776 | 0.063694 | 0.135356 | 0.063852 | 0.135611 |
| TRIM32   | 0.300543 | 0.434822 | 0.663848 | 0.771067 | 0.663256 | 0.770656 |
| TRIM37   | -0.26551 | -0.38396 | 0.701144 | 0.799179 | 0.70061  | 0.798851 |
| TRIM38   | 2.612224 | 4.604068 | 5.06E-06 | 5.68E-05 | 4.99E-06 | 5.61E-05 |
| TRIM46   | 0.72779  | 0.846871 | 0.397406 | 0.53611  | 0.396093 | 0.534339 |
| TRIM5    | -0.43506 | -0.99101 | 0.322082 | 0.464067 | 0.322993 | 0.46424  |
| TRIM54   | 4.284438 | 4.393688 | 1.32E-05 | 0.000126 | 1.24E-05 | 0.000121 |
| TRIM56   | -1.02285 | -2.60613 | 0.009385 | 0.029546 | 0.00963  | 0.030216 |
| TRIO     | -2.23078 | -3.40235 | 0.000713 | 0.003602 | 0.000699 | 0.003544 |
| TRIP10   | 1.812188 | 1.745797 | 0.08136  | 0.1634   | 0.080358 | 0.161956 |
| TRIP11   | 0.532189 | 1.05263  | 0.292936 | 0.435512 | 0.293097 | 0.435238 |
| TRIP12   | 0.100302 | 0.106953 | 0.914862 | 0.948358 | 0.914604 | 0.948122 |
| TRIP13   | 2.399711 | 2.614561 | 0.009159 | 0.029048 | 0.008953 | 0.028515 |
| TRIP4    | -3.30033 | -4.11506 | 4.41E-05 | 0.000352 | 4.22E-05 | 0.000339 |
| TRMT1    | 0.957404 | 2.405789 | 0.01644  | 0.045993 | 0.016789 | 0.046912 |
| TROAP    | 3.421696 | 4.749418 | 2.56E-06 | 3.18E-05 | 2.43E-06 | 3.10E-05 |
| TRPA1    | -3.0768  | -4.29656 | 2.02E-05 | 0.000183 | 1.95E-05 | 0.000176 |
| TRPC4AP  | 2.280796 | 6.406998 | 3.01E-10 | 1.22E-08 | 3.66E-10 | 1.45E-08 |
| TRPC6    | 1.69228  | 3.634246 | 0.000303 | 0.001773 | 0.000308 | 0.001809 |
| TRPM4    | 1.940354 | 4.839592 | 1.66E-06 | 2.25E-05 | 1.78E-06 | 2.40E-05 |
| TRPS1    | -0.3977  | -1.52468 | 0.127867 | 0.231411 | 0.132956 | 0.238873 |
| TRPV6    | 3.902633 | 3.898553 | 0.000108 | 0.000732 | 0.000102 | 0.000701 |
| TRRAP    | 0.575735 | 0.690363 | 0.490233 | 0.622057 | 0.489071 | 0.620749 |
| TRUB2    | -0.70584 | -1.87593 | 0.061152 | 0.131661 | 0.062226 | 0.13318  |

|         |          |          |          |          |          |          |
|---------|----------|----------|----------|----------|----------|----------|
| TSC1    | -0.53391 | -0.96687 | 0.334002 | 0.475358 | 0.333792 | 0.475113 |
| TSC2    | 1.239017 | 2.632248 | 0.008701 | 0.027928 | 0.008771 | 0.028062 |
| TSFM    | -1.12395 | -1.61888 | 0.106001 | 0.200242 | 0.105337 | 0.199148 |
| TSG101  | -0.7136  | -1.39516 | 0.163484 | 0.278599 | 0.163578 | 0.278354 |
| TSN     | -1.50362 | -3.69785 | 0.000237 | 0.001455 | 0.000247 | 0.001504 |
| TSNAX   | 0.883269 | 2.057384 | 0.040082 | 0.093818 | 0.040512 | 0.094635 |
| TSPAN1  | 3.369693 | 4.871797 | 1.42E-06 | 1.99E-05 | 1.35E-06 | 1.92E-05 |
| TSPYL2  | -0.79505 | -1.95405 | 0.051161 | 0.114667 | 0.051836 | 0.116235 |
| TSPYL4  | 1.210428 | 1.908065 | 0.056861 | 0.12481  | 0.056513 | 0.124234 |
| TSSC1   | -2.93129 | -3.20878 | 0.001404 | 0.00631  | 0.001359 | 0.006128 |
| TSSC4   | -0.34594 | -1.22123 | 0.222481 | 0.352669 | 0.227395 | 0.35973  |
| TST     | 2.069271 | 4.046982 | 5.87E-05 | 0.000444 | 5.89E-05 | 0.000446 |
| TSTA3   | -0.07234 | -0.1134  | 0.909755 | 0.945507 | 0.909626 | 0.945435 |
| TTC1    | 0.24444  | 0.295793 | 0.767491 | 0.846563 | 0.766893 | 0.846103 |
| TTC13   | 1.645006 | 2.410391 | 0.016236 | 0.045558 | 0.016042 | 0.045096 |
| TTC14   | 1.443152 | 2.83226  | 0.004778 | 0.017264 | 0.004788 | 0.017289 |
| TTC4    | -0.62944 | -0.96928 | 0.332795 | 0.474125 | 0.332051 | 0.473352 |
| TTC7A   | 0.018893 | 0.024263 | 0.980651 | 0.986382 | 0.980604 | 0.986337 |
| TTF2    | -1.50498 | -1.67779 | 0.093911 | 0.181724 | 0.092955 | 0.180607 |
| TTK     | 1.628928 | 3.004448 | 0.002772 | 0.01106  | 0.002764 | 0.011045 |
| TLL1    | 0.606266 | 1.498781 | 0.134458 | 0.240927 | 0.135625 | 0.242555 |
| TTN     | 3.876461 | 5.901191 | 6.05E-09 | 1.71E-07 | 5.70E-09 | 1.62E-07 |
| TTR     | -3.40437 | -2.90258 | 0.003837 | 0.014358 | 0.003714 | 0.014068 |
| TUBB    | -3.68517 | -6.49299 | 1.77E-10 | 7.92E-09 | 1.71E-10 | 7.98E-09 |
| TUBB4   | 0.560764 | 0.586572 | 0.557712 | 0.682261 | 0.556491 | 0.681122 |
| TUBE1   | 2.24606  | 4.522897 | 7.36E-06 | 7.75E-05 | 7.43E-06 | 7.86E-05 |
| TUBGCP2 | 0.732304 | 0.763887 | 0.445236 | 0.580796 | 0.443822 | 0.579274 |
| TUBGCP3 | -0.51096 | -0.84943 | 0.395981 | 0.534648 | 0.39548  | 0.533818 |
| TUFT1   | 1.35117  | 1.722613 | 0.085476 | 0.169437 | 0.084711 | 0.168133 |
| TULP3   | -1.0431  | -2.66003 | 0.008023 | 0.026277 | 0.008241 | 0.026823 |
| TUSC2   | 0.63302  | 1.343867 | 0.179501 | 0.299169 | 0.179959 | 0.299932 |
| TXN2    | 1.909942 | 7.742123 | 4.19E-14 | 5.63E-12 | 9.57E-14 | 1.15E-11 |
| TXNDC11 | 0.655291 | 0.643082 | 0.520417 | 0.649313 | 0.519057 | 0.64796  |
| TXNDC9  | -0.38701 | -0.677   | 0.498667 | 0.629991 | 0.498367 | 0.629488 |
| TXNL1   | 0.848778 | 2.103402 | 0.035848 | 0.085673 | 0.036408 | 0.086906 |
| TXNL4A  | -0.97394 | -1.08216 | 0.279618 | 0.419471 | 0.278211 | 0.418028 |
| TXNRD2  | 1.017105 | 3.953467 | 8.62E-05 | 0.000611 | 0.000107 | 0.000727 |
| TYK2    | -0.69108 | -3.01218 | 0.002703 | 0.010841 | 0.003223 | 0.012541 |
| TYMS    | -0.79675 | -1.45239 | 0.146918 | 0.257171 | 0.146762 | 0.257189 |
| TYRO3   | 2.234697 | 2.215022 | 0.027135 | 0.068236 | 0.026641 | 0.067246 |
| TYROBP  | 0.458654 | 0.603777 | 0.546221 | 0.672052 | 0.545291 | 0.671083 |

|         |          |          |          |          |          |          |
|---------|----------|----------|----------|----------|----------|----------|
| U2AF1   | -0.5711  | -1.2034  | 0.229299 | 0.361889 | 0.229752 | 0.362604 |
| U2AF2   | 1.425333 | 3.604264 | 0.000339 | 0.001946 | 0.000355 | 0.002028 |
| UBA52   | 1.111473 | 3.57463  | 0.000379 | 0.002128 | 0.000422 | 0.002324 |
| UBE2A   | 1.603474 | 3.393836 | 0.000735 | 0.003682 | 0.000744 | 0.003722 |
| UBE2B   | -1.28706 | -2.26551 | 0.023838 | 0.061723 | 0.023745 | 0.06142  |
| UBE2C   | -0.48591 | -0.85251 | 0.394275 | 0.532957 | 0.393954 | 0.532524 |
| UBE2D2  | -0.34254 | -0.62735 | 0.530667 | 0.658683 | 0.530527 | 0.658738 |
| UBE2D3  | 0.158884 | 0.306845 | 0.759068 | 0.839445 | 0.759095 | 0.83947  |
| UBE2E3  | 0.476765 | 1.027931 | 0.304398 | 0.446108 | 0.304991 | 0.446699 |
| UBE2G1  | -0.45455 | -0.89205 | 0.372726 | 0.511926 | 0.372851 | 0.511901 |
| UBE2G2  | -1.48547 | -3.65361 | 0.000281 | 0.001671 | 0.000293 | 0.00174  |
| UBE2J1  | -1.73154 | -4.11731 | 4.37E-05 | 0.000351 | 4.56E-05 | 0.00036  |
| UBE2L3  | -1.13672 | -2.08831 | 0.037192 | 0.088373 | 0.03713  | 0.088136 |
| UBE2L6  | -2.53637 | -4.81127 | 1.90E-06 | 2.49E-05 | 1.90E-06 | 2.54E-05 |
| UBE2M   | -0.54816 | -1.96647 | 0.049706 | 0.111833 | 0.052269 | 0.116815 |
| UBE2V2  | -2.07559 | -6.50261 | 1.67E-10 | 7.76E-09 | 2.24E-10 | 1.01E-08 |
| UBE4B   | 1.461215 | 3.603513 | 0.00034  | 0.001949 | 0.000354 | 0.002025 |
| UBL3    | 0.48151  | 0.678972 | 0.497418 | 0.628859 | 0.496556 | 0.628233 |
| UBN1    | -0.00249 | -0.00978 | 0.992197 | 0.9941   | 0.992306 | 0.99421  |
| UBOX5   | -1.01577 | -2.63209 | 0.008705 | 0.027928 | 0.008955 | 0.028515 |
| UBP1    | 1.446798 | 2.316555 | 0.020865 | 0.055688 | 0.020697 | 0.055397 |
| UBQLN1  | 1.997452 | 4.161808 | 3.62E-05 | 0.000297 | 3.67E-05 | 0.0003   |
| UBQLN2  | -0.54569 | -0.79548 | 0.426653 | 0.563604 | 0.425802 | 0.562787 |
| UBR1    | -1.20701 | -1.37639 | 0.169215 | 0.285877 | 0.168003 | 0.284443 |
| UBTD1   | -0.1389  | -0.14826 | 0.882189 | 0.926752 | 0.881833 | 0.926378 |
| UCHL1   | 0.606353 | 0.901401 | 0.367738 | 0.506853 | 0.366907 | 0.505856 |
| UCHL3   | -2.48117 | -2.87789 | 0.004146 | 0.015297 | 0.004042 | 0.014995 |
| UCK2    | 0.340441 | 0.388579 | 0.697726 | 0.79711  | 0.696909 | 0.796291 |
| UCN     | -2.59002 | -4.87307 | 1.41E-06 | 1.99E-05 | 1.40E-06 | 1.98E-05 |
| UCP2    | 0.416663 | 0.49717  | 0.619252 | 0.733674 | 0.618307 | 0.733109 |
| UFD1L   | -0.49399 | -1.08766 | 0.277185 | 0.416753 | 0.27789  | 0.417947 |
| UGCG    | 0.505013 | 1.535975 | 0.125074 | 0.227671 | 0.127636 | 0.231171 |
| UGT1A6  | 3.286898 | 3.336309 | 0.000902 | 0.004351 | 0.000868 | 0.004228 |
| UGT8    | -0.59481 | -0.93309 | 0.351151 | 0.490946 | 0.350463 | 0.490376 |
| UHRF1   | -0.58783 | -1.05115 | 0.293614 | 0.435739 | 0.293356 | 0.435357 |
| ULK1    | -0.20559 | -0.67467 | 0.500149 | 0.630891 | 0.503823 | 0.63338  |
| ULK2    | 0.425906 | 1.088507 | 0.27681  | 0.416455 | 0.278493 | 0.418134 |
| UMPS    | -0.48752 | -0.81295 | 0.416568 | 0.554166 | 0.416083 | 0.553678 |
| UNC119  | 1.099117 | 3.4689   | 0.00056  | 0.002942 | 0.000616 | 0.003182 |
| UNC13B  | 1.863963 | 2.96148  | 0.003183 | 0.012385 | 0.003142 | 0.012264 |
| UNC93B1 | 2.557879 | 2.822711 | 0.00492  | 0.017703 | 0.004795 | 0.017294 |



|          |          |          |          |          |          |          |
|----------|----------|----------|----------|----------|----------|----------|
| UNG      | -0.36182 | -0.64024 | 0.522263 | 0.65127  | 0.522008 | 0.650952 |
| UNKL     | -0.20527 | -0.28019 | 0.779427 | 0.854914 | 0.778963 | 0.854804 |
| UPF3A    | 1.116171 | 2.62495  | 0.008888 | 0.028378 | 0.009043 | 0.028659 |
| UPK1A    | 0.776075 | 0.84864  | 0.396421 | 0.53501  | 0.395017 | 0.533585 |
| UPP1     | -0.14552 | -0.41982 | 0.674767 | 0.778832 | 0.6765   | 0.78064  |
| UQCRB    | -0.19247 | -0.34633 | 0.729218 | 0.820523 | 0.729092 | 0.820382 |
| UQCRC1   | 0.550792 | 0.981518 | 0.326734 | 0.467759 | 0.326463 | 0.467371 |
| UQCRC2   | -0.28069 | -0.58572 | 0.558288 | 0.68261  | 0.558631 | 0.682675 |
| UQCRCFS1 | 0.774194 | 0.875942 | 0.381413 | 0.519908 | 0.380047 | 0.518876 |
| UROD     | 0.601118 | 0.864896 | 0.387443 | 0.526904 | 0.386538 | 0.52574  |
| UROS     | -0.16119 | -0.47481 | 0.635097 | 0.746052 | 0.637153 | 0.747482 |
| USF2     | 0.064668 | 0.160893 | 0.872232 | 0.919993 | 0.872623 | 0.920406 |
| USP1     | -1.37705 | -2.29618 | 0.022011 | 0.057988 | 0.021871 | 0.057848 |
| USP10    | 0.695167 | 1.197638 | 0.231532 | 0.364923 | 0.231152 | 0.364569 |
| USP13    | -2.22943 | -4.11395 | 4.43E-05 | 0.000352 | 4.41E-05 | 0.000352 |
| USP14    | 0.63936  | 1.16856  | 0.243047 | 0.377377 | 0.242876 | 0.377295 |
| USP15    | 0.965025 | 2.453119 | 0.014447 | 0.04158  | 0.014781 | 0.042336 |
| USP16    | -0.45781 | -0.62005 | 0.535464 | 0.662633 | 0.534569 | 0.661699 |
| USP2     | -0.03799 | -0.07794 | 0.937902 | 0.963946 | 0.937945 | 0.963865 |
| USP30    | 0.526322 | 0.615864 | 0.538218 | 0.664991 | 0.537096 | 0.663998 |
| USP31    | 1.577789 | 2.232712 | 0.025937 | 0.065918 | 0.025641 | 0.065355 |
| USP32    | 0.789101 | 1.801475 | 0.072132 | 0.148751 | 0.072673 | 0.149612 |
| USP33    | -2.25133 | -4.19424 | 3.15E-05 | 0.000264 | 3.14E-05 | 0.000263 |
| USP39    | -0.87352 | -0.86365 | 0.388125 | 0.527374 | 0.386587 | 0.52574  |
| USP42    | 1.160528 | 1.768219 | 0.077534 | 0.157345 | 0.077059 | 0.156638 |
| USP48    | 1.908243 | 5.155107 | 3.45E-07 | 5.71E-06 | 3.87E-07 | 6.42E-06 |
| USP5     | -2.20342 | -2.69023 | 0.00734  | 0.024449 | 0.007187 | 0.024019 |
| USP53    | 0.439203 | 0.562464 | 0.574011 | 0.69586  | 0.57308  | 0.694911 |
| USP7     | -1.1003  | -1.68332 | 0.092834 | 0.180522 | 0.092319 | 0.179891 |
| USP8     | 0.003003 | 0.013149 | 0.989513 | 0.992682 | 0.989706 | 0.992875 |
| USP9X    | 1.921    | 2.473418 | 0.013659 | 0.039752 | 0.013434 | 0.039289 |
| USP9Y    | 0.234822 | 0.214668 | 0.830099 | 0.890136 | 0.829527 | 0.889929 |
| UST      | -1.6985  | -2.20593 | 0.027768 | 0.069579 | 0.027399 | 0.068753 |
| UTP14A   | -0.07686 | -0.11271 | 0.910302 | 0.945507 | 0.91014  | 0.945461 |
| UTRN     | -1.80251 | -2.71045 | 0.006912 | 0.023238 | 0.006818 | 0.023003 |
| UTY      | 1.922461 | 5.4044   | 9.40E-08 | 1.86E-06 | 1.09E-07 | 2.13E-06 |
| UVRAG    | 0.070079 | 0.196077 | 0.844616 | 0.899546 | 0.845392 | 0.900373 |
| UXT      | -2.20236 | -3.19765 | 0.001459 | 0.006511 | 0.001429 | 0.006396 |
| VAMP2    | -0.42914 | -1.35141 | 0.177074 | 0.296384 | 0.180358 | 0.300491 |
| VAMP3    | 1.433709 | 1.766208 | 0.077871 | 0.157892 | 0.077105 | 0.156638 |
| VAMP4    | 0.785365 | 1.896677 | 0.058352 | 0.12702  | 0.05902  | 0.128029 |

|          |          |          |          |          |          |          |
|----------|----------|----------|----------|----------|----------|----------|
| VAMP5    | 1.299334 | 1.314428 | 0.189206 | 0.310584 | 0.187799 | 0.309071 |
| VANGL1   | 2.395101 | 3.744306 | 0.000198 | 0.00124  | 0.000194 | 0.001219 |
| VAPA     | 2.520549 | 5.935105 | 4.98E-09 | 1.43E-07 | 5.36E-09 | 1.55E-07 |
| VAPB     | -1.40934 | -2.81257 | 0.005076 | 0.018115 | 0.005093 | 0.018135 |
| VASP     | 2.557761 | 2.740042 | 0.006327 | 0.021688 | 0.006169 | 0.021194 |
| VAT1     | 0.33737  | 1.037836 | 0.299766 | 0.441491 | 0.303162 | 0.444954 |
| VAV1     | 0.733943 | 1.481827 | 0.138913 | 0.246747 | 0.139122 | 0.24684  |
| VAV2     | 1.91582  | 4.566483 | 6.02E-06 | 6.62E-05 | 6.34E-06 | 6.93E-05 |
| VAV3     | 2.624508 | 3.047548 | 0.002409 | 0.009897 | 0.002342 | 0.009664 |
| VBPI     | -1.61724 | -2.48857 | 0.013097 | 0.038352 | 0.012955 | 0.038104 |
| VDAC1    | -1.15209 | -3.10446 | 0.001996 | 0.008423 | 0.002088 | 0.008763 |
| VDAC3    | -0.18935 | -0.45049 | 0.65252  | 0.761088 | 0.653317 | 0.761933 |
| VDR      | -0.396   | -0.69442 | 0.48769  | 0.619422 | 0.487394 | 0.619457 |
| VEGFB    | -0.3756  | -1.30098 | 0.193767 | 0.315779 | 0.198258 | 0.321315 |
| VGLL4    | -1.66131 | -2.56058 | 0.010694 | 0.032745 | 0.010574 | 0.032468 |
| VIL1     | -0.02818 | -0.03967 | 0.96837  | 0.979947 | 0.968306 | 0.979949 |
| VIP      | 1.055272 | 1.890582 | 0.059163 | 0.128251 | 0.05903  | 0.128029 |
| VIPR1    | 1.158349 | 1.980522 | 0.048103 | 0.108694 | 0.047907 | 0.108298 |
| VIPR2    | -0.5156  | -0.60873 | 0.542932 | 0.668889 | 0.541829 | 0.667697 |
| VKORC1L1 | -1.31492 | -1.61482 | 0.106877 | 0.2016   | 0.10597  | 0.200023 |
| VNN1     | 0.423822 | 0.429407 | 0.667782 | 0.773995 | 0.666788 | 0.773041 |
| VPS11    | 0.733047 | 2.031446 | 0.042651 | 0.098388 | 0.043667 | 0.100355 |
| VPS13C   | 0.701546 | 1.460852 | 0.144581 | 0.254217 | 0.14492  | 0.254626 |
| VPS13D   | -0.07439 | -0.15398 | 0.877678 | 0.924073 | 0.877774 | 0.923973 |
| VPS28    | 1.564571 | 3.638577 | 0.000298 | 0.001752 | 0.000307 | 0.001806 |
| VPS35    | 1.50194  | 2.59313  | 0.009743 | 0.030389 | 0.009684 | 0.030344 |
| VPS41    | -0.07045 | -0.21496 | 0.82987  | 0.890093 | 0.831014 | 0.890913 |
| VPS4A    | -1.29193 | -2.8914  | 0.003975 | 0.014791 | 0.004034 | 0.014976 |
| VPS4B    | 0.91378  | 1.053557 | 0.292511 | 0.43534  | 0.291155 | 0.433596 |
| VPS54    | -0.55514 | -1.21131 | 0.226255 | 0.357927 | 0.226888 | 0.359169 |
| VRK2     | 1.378946 | 3.644022 | 0.000292 | 0.00172  | 0.000308 | 0.001811 |
| VRK3     | 1.440022 | 1.731868 | 0.083813 | 0.166986 | 0.082989 | 0.165687 |
| VSIG2    | 0.283058 | 0.398625 | 0.690312 | 0.791912 | 0.689721 | 0.791272 |
| VSIG4    | 1.955747 | 4.293786 | 2.05E-05 | 0.000183 | 2.10E-05 | 0.000189 |
| VSNL1    | -0.76112 | -1.07423 | 0.283153 | 0.423423 | 0.282189 | 0.422251 |
| VTI1B    | -0.2229  | -0.6851  | 0.493548 | 0.625586 | 0.496572 | 0.628233 |
| WARS     | -3.61722 | -5.81204 | 1.00E-08 | 2.58E-07 | 9.59E-09 | 2.53E-07 |
| WAS      | -2.95605 | -6.8057  | 2.45E-11 | 1.56E-09 | 2.66E-11 | 1.71E-09 |
| WASF1    | -0.2926  | -0.51943 | 0.603656 | 0.720646 | 0.603444 | 0.720393 |
| WASF2    | 0.596213 | 1.600625 | 0.109988 | 0.205708 | 0.111524 | 0.208167 |
| WASL     | -0.06514 | -0.07108 | 0.943354 | 0.966804 | 0.943185 | 0.966631 |

|         |          |          |          |          |          |          |
|---------|----------|----------|----------|----------|----------|----------|
| WBP11   | 2.666397 | 5.180016 | 3.04E-07 | 5.13E-06 | 3.04E-07 | 5.14E-06 |
| WBP2    | 0.998641 | 3.75619  | 0.000189 | 0.001192 | 0.000227 | 0.001405 |
| WDFY1   | -1.2899  | -3.64605 | 0.00029  | 0.001709 | 0.000311 | 0.001823 |
| WDHD1   | 2.520345 | 6.026811 | 2.93E-09 | 9.35E-08 | 3.18E-09 | 1.01E-07 |
| WDR1    | -1.2713  | -3.5085  | 0.000484 | 0.002599 | 0.000515 | 0.002733 |
| WDR18   | 0.522174 | 0.662693 | 0.507782 | 0.636852 | 0.506735 | 0.635768 |
| WDR20   | 0.704325 | 1.629017 | 0.103836 | 0.197025 | 0.104552 | 0.198142 |
| WDR26   | 2.760335 | 4.6966   | 3.28E-06 | 3.97E-05 | 3.21E-06 | 3.90E-05 |
| WDR3    | -1.61664 | -2.36661 | 0.018269 | 0.050155 | 0.018058 | 0.049739 |
| WDR33   | -1.18067 | -2.22319 | 0.026576 | 0.067155 | 0.026557 | 0.067071 |
| WDR4    | -0.08086 | -0.13776 | 0.890474 | 0.932328 | 0.890377 | 0.932228 |
| WDR44   | 2.553683 | 8.568708 | 8.91E-17 | 2.00E-14 | 1.60E-16 | 3.59E-14 |
| WDR45   | 1.957742 | 3.249164 | 0.001222 | 0.005616 | 0.001207 | 0.005546 |
| WDR5    | 0.903518 | 1.350356 | 0.177413 | 0.29674  | 0.176673 | 0.295818 |
| WFS1    | -0.4185  | -1.16272 | 0.245409 | 0.380541 | 0.247738 | 0.3839   |
| WHSC1   | -1.30282 | -1.87616 | 0.06112  | 0.131652 | 0.060628 | 0.130771 |
| WISP1   | 1.354069 | 3.371215 | 0.000797 | 0.003933 | 0.000826 | 0.004059 |
| WISP2   | -0.47692 | -0.50614 | 0.612944 | 0.729141 | 0.611857 | 0.728216 |
| WNK1    | -0.91311 | -1.18879 | 0.234994 | 0.368771 | 0.233887 | 0.367772 |
| WNK2    | -0.04779 | -0.05929 | 0.952744 | 0.972398 | 0.952623 | 0.972275 |
| WNT10B  | 0.937189 | 1.544901 | 0.122899 | 0.224937 | 0.12248  | 0.224165 |
| WNT4    | 0.627116 | 1.130822 | 0.258583 | 0.396522 | 0.25836  | 0.396051 |
| WRN     | -0.26112 | -0.36881 | 0.712399 | 0.806829 | 0.71185  | 0.806411 |
| WT1     | -0.03507 | -0.03888 | 0.968998 | 0.98005  | 0.968907 | 0.979958 |
| WTAP    | 2.318553 | 3.266713 | 0.00115  | 0.005342 | 0.001124 | 0.00523  |
| WWP1    | 3.170287 | 8.377308 | 3.87E-16 | 6.99E-14 | 4.92E-16 | 8.57E-14 |
| WWP2    | -1.43734 | -2.04498 | 0.041294 | 0.095818 | 0.040895 | 0.095294 |
| XBP1    | -0.90107 | -1.67955 | 0.093568 | 0.181433 | 0.093501 | 0.181368 |
| XK      | -0.94203 | -1.0025  | 0.316507 | 0.458706 | 0.315031 | 0.456848 |
| XPC     | 0.12315  | 0.172711 | 0.862937 | 0.913925 | 0.862661 | 0.913541 |
| XPNPEP1 | 2.217788 | 4.956263 | 9.37E-07 | 1.40E-05 | 9.73E-07 | 1.45E-05 |
| XPNPEP2 | 3.211112 | 3.987828 | 7.49E-05 | 0.000544 | 7.18E-05 | 0.000526 |
| XPO1    | 0.340483 | 0.480222 | 0.631245 | 0.743493 | 0.630561 | 0.742766 |
| XPO4    | 0.336431 | 0.910096 | 0.363138 | 0.502281 | 0.365274 | 0.504245 |
| XPR1    | 1.349343 | 2.998931 | 0.002822 | 0.01123  | 0.002865 | 0.011391 |
| XRCC3   | 0.063015 | 0.091939 | 0.926777 | 0.955709 | 0.926643 | 0.955931 |
| XRCC4   | 1.570629 | 3.023289 | 0.002608 | 0.010538 | 0.002609 | 0.010543 |
| XRCC5   | -0.09461 | -0.12689 | 0.89907  | 0.938611 | 0.898845 | 0.938377 |
| XRN1    | -0.31741 | -0.7286  | 0.46653  | 0.602719 | 0.467412 | 0.603561 |
| XYLT1   | -1.38334 | -1.53721 | 0.124771 | 0.227383 | 0.123669 | 0.225576 |
| YAF2    | 1.501907 | 4.069245 | 5.35E-05 | 0.00041  | 5.77E-05 | 0.000438 |

|         |          |          |          |          |          |          |
|---------|----------|----------|----------|----------|----------|----------|
| YARS    | 1.344589 | 4.851089 | 1.57E-06 | 2.14E-05 | 2.04E-06 | 2.68E-05 |
| YEATS4  | -1.22439 | -1.86072 | 0.063274 | 0.13487  | 0.062847 | 0.134203 |
| YES1    | 0.924948 | 1.507473 | 0.132218 | 0.237471 | 0.131756 | 0.236989 |
| YME1L1  | 1.085426 | 2.987063 | 0.002932 | 0.01159  | 0.003068 | 0.012035 |
| YPEL2   | 2.036383 | 1.923945 | 0.054836 | 0.121284 | 0.054028 | 0.119723 |
| YTHDF1  | 0.768825 | 1.077106 | 0.281867 | 0.422037 | 0.280887 | 0.420846 |
| YTHDF3  | -1.95612 | -6.46103 | 2.16E-10 | 9.35E-09 | 3.03E-10 | 1.26E-08 |
| YWHAB   | 0.277578 | 0.614393 | 0.53919  | 0.665666 | 0.539812 | 0.666084 |
| YWHAE   | -1.23126 | -2.96182 | 0.00318  | 0.012381 | 0.003258 | 0.012655 |
| YWHAG   | 0.039532 | 0.099983 | 0.920391 | 0.951989 | 0.920656 | 0.952263 |
| YWHAH   | 1.094181 | 3.58154  | 0.000369 | 0.002089 | 0.000414 | 0.002297 |
| YWHAQ   | 2.452368 | 5.173183 | 3.15E-07 | 5.30E-06 | 3.22E-07 | 5.41E-06 |
| YWHAZ   | 0.114709 | 0.315951 | 0.75215  | 0.834144 | 0.753293 | 0.834625 |
| YY1     | 2.301706 | 4.337775 | 1.69E-05 | 0.000155 | 1.68E-05 | 0.000155 |
| ZAK     | -0.91836 | -1.58997 | 0.112369 | 0.209495 | 0.112089 | 0.209138 |
| ZBED4   | 0.367075 | 0.820967 | 0.411992 | 0.549791 | 0.412766 | 0.550199 |
| ZBTB11  | 1.075052 | 2.676049 | 0.007654 | 0.025315 | 0.007841 | 0.025802 |
| ZBTB17  | -0.24117 | -0.31456 | 0.753204 | 0.83466  | 0.752642 | 0.834274 |
| ZBTB2   | 0.617629 | 1.651734 | 0.099114 | 0.189904 | 0.100551 | 0.191875 |
| ZBTB33  | 0.663403 | 0.958997 | 0.337948 | 0.479576 | 0.337039 | 0.47843  |
| ZCCHC3  | 0.620361 | 0.810174 | 0.418163 | 0.555756 | 0.417068 | 0.554204 |
| ZCWPW1  | 0.989929 | 1.700354 | 0.089584 | 0.175876 | 0.089315 | 0.175184 |
| ZDHHC1  | -0.90443 | -2.02124 | 0.0437   | 0.100583 | 0.044044 | 0.100881 |
| ZDHHC14 | -0.01091 | -0.01796 | 0.985673 | 0.990309 | 0.985657 | 0.990293 |
| ZDHHC18 | 0.86132  | 1.328242 | 0.184605 | 0.305615 | 0.183932 | 0.304485 |
| ZDHHC21 | 1.609749 | 2.411321 | 0.016195 | 0.045525 | 0.016014 | 0.045096 |
| ZDHHC5  | 0.782912 | 1.801294 | 0.07216  | 0.148751 | 0.07273  | 0.149664 |
| ZDHHC6  | -0.07958 | -0.12739 | 0.898673 | 0.938405 | 0.898541 | 0.938268 |
| ZDHHC9  | -1.6487  | -3.28148 | 0.001093 | 0.0051   | 0.001097 | 0.005121 |
| ZFP106  | 0.071158 | 0.100114 | 0.920288 | 0.951989 | 0.920127 | 0.951926 |
| ZFP161  | 1.141366 | 1.309123 | 0.190996 | 0.312262 | 0.189742 | 0.311056 |
| ZFP36L2 | 1.438443 | 2.763958 | 0.005886 | 0.020478 | 0.005889 | 0.020414 |
| ZFP37   | 2.327159 | 3.160785 | 0.001653 | 0.007214 | 0.001614 | 0.007054 |
| ZFP64   | 0.284362 | 0.495235 | 0.620616 | 0.734364 | 0.62036  | 0.734062 |
| ZFP91   | 0.601789 | 1.356472 | 0.175461 | 0.294419 | 0.176215 | 0.295263 |
| ZFPL1   | 0.932068 | 1.567387 | 0.117553 | 0.217178 | 0.117191 | 0.216707 |
| ZFPM2   | 1.223829 | 2.524204 | 0.011854 | 0.035418 | 0.011915 | 0.035601 |
| ZFR     | -0.4432  | -0.96934 | 0.332769 | 0.474125 | 0.333441 | 0.475004 |
| ZFX     | 2.553654 | 3.683115 | 0.000251 | 0.00153  | 0.000244 | 0.001494 |
| ZFYVE9  | -0.12627 | -0.20966 | 0.834005 | 0.893102 | 0.83383  | 0.892915 |
| ZIC2    | -2.14865 | -2.37299 | 0.01796  | 0.049665 | 0.017624 | 0.048868 |

|          |          |          |          |          |          |          |
|----------|----------|----------|----------|----------|----------|----------|
| ZMPSTE24 | 0.890206 | 2.876029 | 0.004171 | 0.015352 | 0.004486 | 0.016357 |
| ZMYND11  | 1.471601 | 3.026815 | 0.002578 | 0.010463 | 0.002595 | 0.010498 |
| ZMYND19  | 2.074643 | 2.983526 | 0.002966 | 0.011684 | 0.002911 | 0.011545 |
| ZNF124   | 0.478197 | 0.840047 | 0.401218 | 0.539394 | 0.400903 | 0.538557 |
| ZNF132   | 2.81548  | 6.562982 | 1.14E-10 | 5.71E-09 | 1.24E-10 | 6.35E-09 |
| ZNF134   | -3.65148 | -3.95691 | 8.50E-05 | 0.000606 | 8.09E-05 | 0.000578 |
| ZNF135   | -2.11599 | -2.11052 | 0.035229 | 0.08439  | 0.034642 | 0.083283 |
| ZNF140   | 2.30403  | 5.979888 | 3.84E-09 | 1.20E-07 | 4.36E-09 | 1.32E-07 |
| ZNF142   | 0.219205 | 0.76565  | 0.444187 | 0.57991  | 0.448868 | 0.584236 |
| ZNF148   | 0.720523 | 2.853228 | 0.004478 | 0.016326 | 0.005078 | 0.018123 |
| ZNF165   | 1.39163  | 1.60911  | 0.10812  | 0.203266 | 0.107134 | 0.201897 |
| ZNF174   | -1.37511 | -2.63738 | 0.008572 | 0.027652 | 0.008574 | 0.027596 |
| ZNF184   | -0.52692 | -0.88652 | 0.375695 | 0.514951 | 0.375228 | 0.514011 |
| ZNF187   | 0.653948 | 1.579388 | 0.114776 | 0.212799 | 0.11574  | 0.214586 |
| ZNF189   | 0.277526 | 0.60133  | 0.547848 | 0.672821 | 0.548363 | 0.673277 |
| ZNF202   | -1.49605 | -2.43682 | 0.015107 | 0.043024 | 0.014985 | 0.042712 |
| ZNF211   | 0.99272  | 1.488377 | 0.137179 | 0.24459  | 0.136514 | 0.24359  |
| ZNF212   | 1.046913 | 2.568915 | 0.010443 | 0.032164 | 0.010665 | 0.032654 |
| ZNF213   | 1.41194  | 1.879654 | 0.060641 | 0.13086  | 0.060057 | 0.129779 |
| ZNF217   | -1.9473  | -2.14766 | 0.032142 | 0.078738 | 0.031636 | 0.077686 |
| ZNF22    | 0.559268 | 0.753229 | 0.451609 | 0.587154 | 0.450605 | 0.586173 |
| ZNF23    | 1.341407 | 4.04532  | 5.91E-05 | 0.000446 | 6.59E-05 | 0.000491 |
| ZNF235   | 1.306632 | 1.583998 | 0.113723 | 0.211431 | 0.112771 | 0.210076 |
| ZNF238   | -1.02617 | -2.09656 | 0.036452 | 0.086878 | 0.036571 | 0.087207 |
| ZNF24    | 0.641997 | 1.058032 | 0.290468 | 0.432847 | 0.289928 | 0.432179 |
| ZNF250   | 1.082913 | 2.363215 | 0.018436 | 0.050451 | 0.018594 | 0.050748 |
| ZNF263   | 2.173438 | 3.397051 | 0.000726 | 0.003655 | 0.000713 | 0.003605 |
| ZNF264   | 0.967412 | 1.309945 | 0.190717 | 0.312262 | 0.189744 | 0.311056 |
| ZNF271   | 0.596898 | 1.080385 | 0.280406 | 0.420386 | 0.280195 | 0.420338 |
| ZNF3     | 0.490719 | 1.070353 | 0.284892 | 0.425753 | 0.285546 | 0.426731 |
| ZNF300   | 1.848987 | 2.113852 | 0.034941 | 0.083831 | 0.034427 | 0.082934 |
| ZNF317   | -0.89507 | -1.93997 | 0.052853 | 0.117674 | 0.053156 | 0.11818  |
| ZNF318   | 1.225446 | 2.789999 | 0.005439 | 0.019134 | 0.005525 | 0.019393 |
| ZNF32    | 2.466358 | 5.59863  | 3.30E-08 | 7.24E-07 | 3.47E-08 | 7.70E-07 |
| ZNF324   | -1.41619 | -1.3293  | 0.184256 | 0.305253 | 0.182785 | 0.303136 |
| ZNF330   | -0.74755 | -1.44865 | 0.14796  | 0.25871  | 0.148017 | 0.258713 |
| ZNF347   | 0.444478 | 0.614452 | 0.53915  | 0.665666 | 0.538298 | 0.664996 |
| ZNF350   | 2.469327 | 3.161393 | 0.00165  | 0.007206 | 0.001607 | 0.007038 |
| ZNF395   | 0.40916  | 0.519994 | 0.60326  | 0.72054  | 0.602368 | 0.720023 |
| ZNF410   | -0.68618 | -1.26827 | 0.205194 | 0.330165 | 0.205072 | 0.330194 |
| ZNF419   | -0.24161 | -0.57491 | 0.56557  | 0.688113 | 0.566525 | 0.688739 |

|         |          |          |          |          |          |          |
|---------|----------|----------|----------|----------|----------|----------|
| ZNF44   | 1.998346 | 4.256409 | 2.41E-05 | 0.00021  | 2.46E-05 | 0.000214 |
| ZNF451  | 1.012389 | 2.292236 | 0.022238 | 0.058294 | 0.022478 | 0.058921 |
| ZNF467  | 0.69054  | 1.828492 | 0.067974 | 0.141989 | 0.069098 | 0.143636 |
| ZNF473  | 0.655902 | 1.092545 | 0.275034 | 0.414181 | 0.27453  | 0.413423 |
| ZNF503  | 0.48882  | 1.037236 | 0.300045 | 0.441657 | 0.300553 | 0.442274 |
| ZNF511  | 2.130342 | 6.395082 | 3.24E-10 | 1.28E-08 | 4.14E-10 | 1.59E-08 |
| ZNF513  | 2.607338 | 5.959104 | 4.33E-09 | 1.31E-07 | 4.61E-09 | 1.36E-07 |
| ZNF532  | 2.478353 | 3.858618 | 0.000126 | 0.000837 | 0.000123 | 0.00082  |
| ZNF542  | -0.97897 | -2.45883 | 0.014221 | 0.041019 | 0.014534 | 0.04178  |
| ZNF559  | 1.071071 | 1.829941 | 0.067756 | 0.141788 | 0.067515 | 0.14122  |
| ZNF561  | -0.48702 | -1.04831 | 0.294918 | 0.436709 | 0.295502 | 0.437298 |
| ZNF577  | -1.35298 | -1.74408 | 0.08166  | 0.163668 | 0.080927 | 0.162476 |
| ZNF585A | 0.189518 | 0.315282 | 0.752658 | 0.834314 | 0.752406 | 0.834274 |
| ZNF608  | -0.57534 | -0.99969 | 0.317863 | 0.459902 | 0.3175   | 0.459436 |
| ZNF609  | -0.60772 | -0.94253 | 0.3463   | 0.487308 | 0.345578 | 0.487348 |
| ZNF644  | 1.993519 | 5.440543 | 7.76E-08 | 1.56E-06 | 8.84E-08 | 1.76E-06 |
| ZNF646  | 0.495194 | 0.493475 | 0.621858 | 0.735649 | 0.620735 | 0.73432  |
| ZNF658  | 0.967222 | 1.417841 | 0.156758 | 0.269679 | 0.156007 | 0.26863  |
| ZNF75A  | 0.865675 | 2.825026 | 0.004885 | 0.017595 | 0.005254 | 0.018567 |
| ZNF76   | -4.66014 | -4.53107 | 7.09E-06 | 7.54E-05 | 6.61E-06 | 7.18E-05 |
| ZNF79   | 1.95041  | 2.760821 | 0.005943 | 0.020577 | 0.005843 | 0.020377 |
| ZNF81   | -1.06027 | -1.4763  | 0.14039  | 0.248524 | 0.13957  | 0.247446 |
| ZNF85   | 0.261379 | 0.48644  | 0.626833 | 0.74023  | 0.626762 | 0.740124 |
| ZNHIT2  | -0.70468 | -1.51286 | 0.130844 | 0.23526  | 0.131296 | 0.236344 |
| ZNRD1   | -1.05845 | -1.48612 | 0.137774 | 0.245187 | 0.136977 | 0.244137 |
| ZSCAN2  | 2.078587 | 3.013275 | 0.002694 | 0.010812 | 0.002644 | 0.010658 |
| ZSWIM1  | -0.27925 | -0.80897 | 0.418856 | 0.55632  | 0.421526 | 0.558863 |
| ZW10    | 0.589922 | 0.87683  | 0.380931 | 0.519703 | 0.380104 | 0.518876 |
| ZWINT   | 1.148056 | 1.663205 | 0.096795 | 0.185841 | 0.096171 | 0.185171 |

**Supplementary Table 5. Major pathway "inflammatory disease" and its sub-pathways (IPA results)**

| Asian Affymetrix datasets |                            |          |                                                                                                                                                                                                                                                                                                                                                                                                                                                                                                                                                                                                                                                                                                                                                                                                                                                                                                                                                                                                                                                                                                                                                                                                                                           |                       |
|---------------------------|----------------------------|----------|-------------------------------------------------------------------------------------------------------------------------------------------------------------------------------------------------------------------------------------------------------------------------------------------------------------------------------------------------------------------------------------------------------------------------------------------------------------------------------------------------------------------------------------------------------------------------------------------------------------------------------------------------------------------------------------------------------------------------------------------------------------------------------------------------------------------------------------------------------------------------------------------------------------------------------------------------------------------------------------------------------------------------------------------------------------------------------------------------------------------------------------------------------------------------------------------------------------------------------------------|-----------------------|
| Major disease             | Sub-disease                | p-Value  | Constituent gene(s)                                                                                                                                                                                                                                                                                                                                                                                                                                                                                                                                                                                                                                                                                                                                                                                                                                                                                                                                                                                                                                                                                                                                                                                                                       | # Constituent gene(s) |
| Inflammatory Disease      | Rheumatic Disease          | 6.82E-08 | ABCG2, ACO1, ACTL6A, ADAMTS1, ADAMTS2, AGER, AKAP13, AKR1A1, ALAS2, ALPL, ANXA1, AQP9, AR, ARIH1, ATM, B2M, BARD1, BCL6, BIRC5, BMP2, BRD2, C1R, CACNA2D1, CACNA2D2, CALCRL, CALR, CAMP, CCL13, CCL18, CCR1, CD33, CD34, CD36, CD68, CD79B, CD81, CD86, CILP, CLIC2, CLSTN2, COL9A2, COX15, CSF3R, CTSG, CXCL12, CYYR1, DEK, DHODH, EDNRA, EDNRB, EEF2, EGLN1, ELF3, ENPP2, EPOR, ERG, F10, F11R, FABP4, FAU, FGFR1OP, FN1, FOSB, GAB1, GABRD, GCA, GHR, GNB2, GOLPH3, GRN, GSR, HCG9, HDAC2, HIST1H2AC, HLA-C, HLA-DPB1, HLA-DQA1, HLA-DQB1, HMGB1, HNMT, HSPA1L, HYAL1, HYAL2, ICA1, ICOSLG, IDE, IFIT1, IFNAR1, IGF1, IGF1R, IGF2, IL11RA, IL18, IL1R1, IL2RA, IL4R, KLF12, LRRK2, MAG1, MAP4K4, MFHAS1, MYCBP2, MYO1C, NAGLU, NELL1, NR4A1, NR4A2, NR4A3, NUMB, NUP62, PCMI, PDE5A, PDGFD, PECAM1, PFAS, PHIP, PHTF1, PIK3CG, PPAT, PPP2CA, PPP3CB, PPP3R1, PRDX2, PRRC2A, PTGIR, PTK2B, PURA, PXX, RALA, RALB, RAMP2, RARRES2, RBP4, RECK, RFX3, RGS1, RGS6, RPS13, RPS16, S100A10, SCAP, SCML1, SCN1B, SCN3A, SDC4, SEC24B, SEL1L, SELP, SIPA1, SNCA, SRC, STAT3, STK19, SYN3, TCF4, TGFB2, TJP1, TLR3, TNFAIP3, TNFRSF1B, TNRC6B, TOPBP1, TP53BP1, TRIM10, TRIM21, TRIM26, TRIM31, TUBB4A, TUBE1, UFL1, USP15, VDR, VIPR2, ZMYND11 | 172                   |
| Inflammatory Disease      | arthritis                  | 2.35E-07 | ABCG2, ACO1, ACTL6A, ADAMTS1, ADAMTS2, AGER, AKAP13, AKR1A1, ALAS2, ALPL, ANXA1, AQP9, AR, ARIH1, ATM, B2M, BARD1, BCL6, BIRC5, BMP2, BRD2, CACNA2D1, CACNA2D2, CALCRL, CALR, CCL13, CCL18, CCR1, CD33, CD36, CD68, CD79B, CD81, CD86, CILP, CLIC2, CLSTN2, COL9A2, COX15, CSF3R, CXCL12, CYYR1, DEK, DHODH, EEF2, EGLN1, ELF3, ENPP2, EPOR, F10, F11R, FABP4, FAU, FGFR1OP, FOSB, GABRD, GCA, GHR, GNB2, GOLPH3, GRN, GSR, HCG9, HDAC2, HIST1H2AC, HLA-C, HLA-DPB1, HLA-DQA1, HLA-DQB1, HMGB1, HNMT, HSPA1L, HYAL1, HYAL2, ICOSLG, IDE, IFNAR1, IGF1, IGF1R, IGF2, IL11RA, IL18, IL1R1, IL2RA, IL4R, KLF12, LRRK2, MAG1, MAP4K4, MFHAS1, MYCBP2, MYO1C, NAGLU, NELL1, NR4A1, NR4A2, NR4A3, NUMB, NUP62, PCMI, PDGFD, PECAM1, PFAS, PHIP, PHTF1, PIK3CG, PPAT, PPP3CB, PPP3R1, PRDX2, PRRC2A, PTK2B, PURA, RALA, RALB, RAMP2, RARRES2, RBP4, RECK, RFX3, RGS6, RPS13, RPS16, S100A10, SCAP, SCML1, SCN1B, SCN3A, SDC4, SEC24B, SEL1L, SIPA1, SNCA, SRC, STAT3, STK19, SYN3, TCF4, TGFB2, TJP1, TLR3, TNFAIP3, TNFRSF1B, TNRC6B, TOPBP1, TP53BP1, TRIM10, TRIM26, TRIM31, TUBB4A, TUBE1, UFL1, USP15, VIPR2, ZMYND11                                                                                                                       | 153                   |
| Inflammatory Disease      | rheumatoid arthritis       | 2.68E-06 | ACO1, ACTL6A, ADAMTS2, AGER, AKAP13, AKR1A1, ALAS2, ALPL, ANXA1, AQP9, ARIH1, ATM, B2M, BCL6, BIRC5, BRD2, CALCRL, CALR, CCL13, CCL18, CCR1, CD33, CD36, CD68, CD86, CLIC2, CLSTN2, COX15, CSF3R, CXCL12, CYYR1, DEK, DHODH, EEF2, F10, F11R, FABP4, FAU, FGFR1OP, FOSB, GABRD, GCA, GHR, GNB2, GOLPH3, GRN, GSR, HCG9, HDAC2, HIST1H2AC, HLA-C, HLA-DPB1, HLA-DQA1, HLA-DQB1, HMGB1, HNMT, HSPA1L, ICOSLG, IDE, IFNAR1, IGF1, IGF1R, IGF2, IL11RA, IL18, IL1R1, IL2RA, IL4R, KLF12, LRRK2, MAG1, MAP4K4, MFHAS1, MYCBP2, MYO1C, NAGLU, NELL1, NR4A1, NR4A2, NR4A3, NUMB, PCMI, PECAM1, PFAS, PHIP, PHTF1, PIK3CG, PPAT, PPP3CB, PPP3R1, PRDX2, PRRC2A, PTK2B, RALB, RAMP2, RARRES2, RBP4, RECK, RFX3, RGS6, RPS13, RPS16, S100A10, SCAP, SCML1, SDC4, SEC24B, SEL1L, SNCA, SRC, STAT3, STK19, TCF4, TGFB2, TJP1, TLR3, TNFAIP3, TNFRSF1B, TNRC6B, TOPBP1, TRIM10, TRIM26, TRIM31, UFL1, USP15, VIPR2, ZMYND11                                                                                                                                                                                                                                                                                                                            | 123                   |
| Inflammatory Disease      | Dermatitis                 | 7.79E-04 | ABCA1, AHCY, ANXA1, ANXA5, ARIH1, ATM, CALR, CAMP, CAPZB, CCL13, CCL18, CPVL, CTSV, CYP3A4, FABP4, HLA-C, HLA-DQA1, HNMT, HTR2A, IDE, IL15, IL1R1, IL2RA, IL4R, ITGA6, JUN, KLK6, KLK7, KRT10, LEPR, LPL, MKI67, NKX2-5, NR4A2, OPTN, OSMR, PDK4, PHF1, PITPNB, PPARG, PPP3CB, PSAP, RARB, RNF138, RXRA, SELK, SELP, SELP, SFTPD, SMPD1, SRC, THBD, TNFAIP3, TUBB4A, TUBE1, ZNF395                                                                                                                                                                                                                                                                                                                                                                                                                                                                                                                                                                                                                                                                                                                                                                                                                                                        | 56                    |
| Inflammatory Disease      | Inflammatory Bowel Disease | 1.24E-03 | ANXA1, APEH, CAMP, CD86, CDC42BPA, DAG1, DARS, F10, FMO5, GHR, HLA-DQA1, ICOSLG, IFNAR1, IGF1, IGF1R, IL10RB, IL18, ITGB3, KRAS, LDB2, NELL1, NR5A2, PDE4A, PDE4D, PI3, PPARG, PPAT, PPP3CB, PROCR, RASGRP3, RGS1, SPON1, STAT3, TGFB2, TGFB2, TGFB2, THBD, TLR5, VDR                                                                                                                                                                                                                                                                                                                                                                                                                                                                                                                                                                                                                                                                                                                                                                                                                                                                                                                                                                     | 38                    |
| Inflammatory Disease      | atopic dermatitis          | 2.62E-03 | ABCA1, AHCY, ANXA1, ANXA5, ARIH1, ATM, CAMP, CAPZB, CCL13, CCL18, CPVL, CTSV, FABP4, HLA-C, HLA-DQA1, HNMT, HTR2A, IDE, IL2RA, IL4R, ITGA6, JUN, KLK6, KLK7, KRT10, LEPR, LPL, MKI67, NKX2-5, NR4A2, OPTN, OSMR, PDK4, PHF1, PITPNB, PPARG, PPP3CB, PSAP, RNF138, SELK, SELP, SFTPD, SMPD1, SRC,                                                                                                                                                                                                                                                                                                                                                                                                                                                                                                                                                                                                                                                                                                                                                                                                                                                                                                                                          | 46                    |

|  |  |  |                |  |
|--|--|--|----------------|--|
|  |  |  | TNFAIP3,ZNF395 |  |
|--|--|--|----------------|--|



| non-Asian Affymetrix datasets |                              |          |                                                                                                                                                                                                                                                                  |                       |
|-------------------------------|------------------------------|----------|------------------------------------------------------------------------------------------------------------------------------------------------------------------------------------------------------------------------------------------------------------------|-----------------------|
| Major disease                 | Sub-disease                  | p-Value  | Constituent gene(s)                                                                                                                                                                                                                                              | # Constituent gene(s) |
| Inflammatory Disease          | arthritis                    | 3.28E-05 | ACLY,ADRA1B,ADRA1D,ALOX5,ARHGDIB,BMP4,C2,CACNA2D3,CACNA2D4,CASP3,CCND3,CD3D,CXCL10,DCTN1,DYM,ENO1,FCGR2A,FKBP5,GBP2,GNLY,GRP,GZMA,HCK,HCLS1,ICOS,IGFBP1,IL1A,ITPR3,LTF,MAP4K1,MICA,MS4A1,NPY,PPP1R7,PTPRC,RALGDS,RPS24,RUNX3,SDC1,SND1,SORL1,SPTA1,TYMS,VIP      | 44                    |
| Inflammatory Disease          | Rheumatic Disease            | 2.86E-04 | ACLY,ADRA1B,ADRA1D,ALOX5,ARHGDIB,BMP4,C2,CACNA2D3,CACNA2D4,CASP3,CCND3,CD22,CD3D,CXCL10,DCTN1,DYM,ENO1,FCGR2A,FKBP5,GBP2,GNLY,GRP,GZMA,HCK,HCLS1,ICOS,IGFBP1,IL1A,ITPR3,LTF,MAP4K1,MICA,MS4A1,NPY,PPP1R7,PTPRC,RALGDS,RPS24,RUNX3,SDC1,SND1,SORL1,SPTA1,TYMS,VIP | 45                    |
| Inflammatory Disease          | atopic dermatitis            | 5.37E-04 | CBR1,CD2,DEFB1,ENO1,FKBP4,HCK,HTR2B,IDI1,IL1A,ITGB7,KRT15,KRT16,PRF1,PROM1,SYK,TPM1,TYMS                                                                                                                                                                         | 17                    |
| Inflammatory Disease          | Dermatitis                   | 6.61E-04 | CBR1,CD2,DEFB1,ENO1,FKBP4,HCK,HTR2B,IDI1,IL1A,ITGB7,KRT14,KRT15,KRT16,PRF1,PROM1,PSEN1,SYK,TPM1,TYMS                                                                                                                                                             | 19                    |
| Inflammatory Disease          | rheumatoid arthritis         | 9.83E-04 | ACLY,ALOX5,ARHGDIB,BMP4,C2,CASP3,CD3D,CXCL10,DYM,ENO1,FCGR2A,FKBP5,GBP2,GNLY,GRP,GZMA,HCK,HCLS1,ICOS,ITPR3,LTF,MICA,MS4A1,PPP1R7,PTPRC,RALGDS,RPS24,SDC1,SND1,SORL1,SPTA1,TYMS,VIP                                                                               | 33                    |
| Inflammatory Disease          | sinusitis                    | 5.26E-03 | ADRA1B,ADRA1D,VIP                                                                                                                                                                                                                                                | 3                     |
| Inflammatory Disease          | seasonal allergic rhinitis   | 6.28E-03 | ADRA1B,ADRA1D,HTR2B                                                                                                                                                                                                                                              | 3                     |
| Inflammatory Disease          | ulcerative colitis           | 1.82E-02 | ALOX5,CD3D,IL23A,MS4A1,XBP1                                                                                                                                                                                                                                      | 5                     |
| Inflammatory Disease          | familial acne inversa type 3 | 2.28E-02 | PSEN1                                                                                                                                                                                                                                                            | 1                     |

**Supplementary Table 6. Top 20 Curated genesets (C2-MSigDB) from GSEA ranked by normalised enrichment score (NES) for Affymetrix & non-Affymetrix platform datasets**

| RUV-4 results for all Affymetrix platform cohorts |      |      |             |             |                   |
|---------------------------------------------------|------|------|-------------|-------------|-------------------|
| <i>Asian</i>                                      |      |      |             |             |                   |
| NAME                                              | ES   | NES  | NOM p-value | FDR q-value | Significant (Y/N) |
| SMID_BREAST_CANCER_LUMINAL_A_UP                   | 0.67 | 2.02 | 0.00        | 0.00        | Y                 |
| NAKAYAMA_SOFT_TISSUE_TUMORS_PCA2_DN               | 0.66 | 1.99 | 0.00        | 0.00        | Y                 |
| GEORGANTAS_HSC_MARKERS                            | 0.66 | 1.88 | 0.00        | 0.04        | Y                 |
| YAMASHITA_METHYLATED_IN_PROSTATE_CANCER           | 0.69 | 1.88 | 0.00        | 0.03        | Y                 |
| UZONYI_RESPONSE_TO_LEUKOTRIENE_AND_THROMBIN       | 0.71 | 1.88 | 0.00        | 0.02        | Y                 |
| BOQUEST_STEM_CELL_UP                              | 0.53 | 1.86 | 0.00        | 0.03        | Y                 |
| PETRETTO_CARDIAC_HYPERTROPHY                      | 0.70 | 1.85 | 0.00        | 0.03        | Y                 |
| KEGG_PPAR_SIGNALING_PATHWAY                       | 0.64 | 1.82 | 0.00        | 0.04        | Y                 |
| BERTUCCI_INVASIVE_CARCINOMA_DUCTAL_VS_LOBULAR_DN  | 0.68 | 1.82 | 0.00        | 0.04        | Y                 |
| URS_ADIPOCYTE_DIFFERENTIATION_UP                  | 0.61 | 1.80 | 0.00        | 0.05        | Y                 |
| CHEN_LVAD_SUPPORT_OF_FAILING_HEART_DN             | 0.64 | 1.78 | 0.00        | 0.06        | Y                 |
| SCHLESINGER_METHYLATED_DE_NOVO_IN_CANCER          | 0.58 | 1.78 | 0.00        | 0.06        | Y                 |
| AMIT_SERUM_RESPONSE_60_MCF10A                     | 0.61 | 1.77 | 0.00        | 0.07        | Y                 |
| KEGG_SYSTEMIC_LUPUS_ERYTHEMATOSUS                 | 0.55 | 1.69 | 0.00        | 0.16        | Y                 |
| BOQUEST_STEM_CELL_DN                              | 0.50 | 1.68 | 0.00        | 0.16        | Y                 |
| CUL_TCF21_TARGETS_2_DN                            | 0.47 | 1.68 | 0.00        | 0.15        | Y                 |
| HOELZEL_NF1_TARGETS_DN                            | 0.59 | 1.66 | 0.00        | 0.18        | Y                 |
| SHETH_LIVER_CANCER_VS_TXNIP_LOSS_PAM2             | 0.50 | 1.59 | 0.00        | 0.28        | N                 |
| LU_AGING_BRAIN_UP                                 | 0.46 | 1.57 | 0.00        | 0.29        | N                 |
| SCHAEFFER_PROSTATE_DEVELOPMENT_6HR_UP             | 0.48 | 1.55 | 0.00        | 0.32        | N                 |

*Non-Asian*

| NAME                                                | ES    | NES   | NOM p-value | FDR q-value | Significant (Y/N) |
|-----------------------------------------------------|-------|-------|-------------|-------------|-------------------|
| RICKMAN_HEAD_AND_NECK_CANCER_D                      | -0.75 | -2.51 | 0.00        | 0.00        | Y                 |
| FLECHNER_BIOPSY_KIDNEY_TRANSPLANT_REJECTED_VS_OK_UP | -0.50 | -2.19 | 0.00        | 0.03        | Y                 |
| CROMER_TUMORIGENESIS_DN                             | -0.60 | -2.07 | 0.00        | 0.07        | Y                 |
| SMID_BREAST_CANCER_RELAPSE_IN_BONE_UP               | -0.52 | -2.04 | 0.00        | 0.08        | Y                 |
| HAHTOLA_SEZARY_SYNDROM_DN                           | -0.61 | -1.99 | 0.00        | 0.10        | Y                 |
| ENGELMANN_CANCER_PROGENITORS_DN                     | -0.56 | -1.99 | 0.00        | 0.09        | Y                 |
| SENGUPTA_NASOPHARYNGEAL_CARCINOMA_DN                | -0.43 | -1.96 | 0.00        | 0.10        | Y                 |
| BOSCO_EPITHELIAL_DIFFERENTIATION_MODULE             | -0.57 | -1.94 | 0.00        | 0.10        | Y                 |
| STOSSI_RESPONSE_TO ESTRADIOL                        | -0.46 | -1.86 | 0.00        | 0.16        | Y                 |
| KLEIN_TARGETS_OF_BCR_ABL1_FUSION                    | -0.49 | -1.78 | 0.00        | 0.22        | Y                 |
| LIEN_BREAST_CARCINOMA_METAPLASTIC_VS_DUCTAL_DN      | -0.44 | -1.74 | 0.00        | 0.25        | Y                 |
| SHETH_LIVER_CANCER_VS_TXNIP_LOSS_PAM3               | -0.44 | -1.73 | 0.00        | 0.25        | Y                 |
| MEISSNER_BRAIN_HCP_WITH_H3K4ME2_AND_H3K27ME3        | -0.52 | -1.71 | 0.00        | 0.27        | N                 |
| HUPER_BREAST_BASAL_VS_LUMINAL_UP                    | -0.43 | -1.70 | 0.00        | 0.28        | N                 |
| BHAT_ESR1_TARGETS_VIA_AKT1_UP                       | -0.31 | -1.51 | 0.00        | 0.49        | N                 |
| JAEGER_METASTASIS_DN                                | -0.30 | -1.49 | 0.00        | 0.47        | N                 |
| LI_AMPLIFIED_IN_LUNG_CANCER                         | -0.32 | -1.49 | 0.00        | 0.47        | N                 |
| CHARAFE_BREAST_CANCER_LUMINAL_VS_MESENCHYMAL_UP     | -0.30 | -1.49 | 0.00        | 0.45        | N                 |
| REACTOME_S_PHASE                                    | -0.34 | -1.47 | 0.00        | 0.46        | N                 |
| MATTIOLI_MGUS_VS_PCL                                | -0.35 | -1.43 | 0.00        | 0.50        | N                 |

**Supplementary Table 6. Top 20 Curated genesets (C2-MSigDB) from GSEA ranked by normalised enrichment score (NES) for Affymetrix & non-Affymetrix platform datasets**

| RUV-4 results for all non-Affymetrix platform cohorts |      |       |                |                 |                        |
|-------------------------------------------------------|------|-------|----------------|-----------------|------------------------|
| <i>Asian</i>                                          |      |       |                |                 |                        |
| NAME                                                  | ES*  | NES** | NOM p-value*** | FDR q-value**** | Significant (Y/N)***** |
| CROMER_TUMORIGENESIS_UP                               | 0.69 | 2.18  | 0.00           | 0.00            | Y                      |
| HUPER_BREAST_BASAL_VS_LUMINAL_UP                      | 0.62 | 1.98  | 0.00           | 0.06            | Y                      |
| HUMMERICH_SKIN_CANCER_PROGRESSION_UP                  | 0.56 | 1.95  | 0.00           | 0.08            | Y                      |
| WINZEN_DEGRADED_VIA_KHSRP                             | 0.58 | 1.94  | 0.00           | 0.07            | Y                      |
| ZHAN_MULTIPLE_MYELOMA_CD1_DN                          | 0.69 | 1.92  | 0.00           | 0.07            | Y                      |
| HOWLIN_PUBERTAL_MAMMARY_GLAND                         | 0.62 | 1.91  | 0.00           | 0.07            | Y                      |
| NIELSEN_GIST_AND_SYNOVIAL_SARCOMA_DN                  | 0.70 | 1.88  | 0.00           | 0.11            | Y                      |
| CHIBA_RESPONSE_TO_TSA_UP                              | 0.57 | 1.86  | 0.00           | 0.11            | Y                      |
| JAEGER_METASTASIS_DN                                  | 0.47 | 1.86  | 0.00           | 0.10            | Y                      |
| KONDO_PROSTATE_CANCER_HCP_WITH_H3K27ME3               | 0.63 | 1.86  | 0.00           | 0.09            | Y                      |
| COLDREN_GEFITINIB_RESISTANCE_DN                       | 0.49 | 1.86  | 0.00           | 0.09            | Y                      |
| BOSCO_EPITHELIAL_DIFFERENTIATION_MODULE               | 0.62 | 1.86  | 0.00           | 0.08            | Y                      |
| ONDER_CDH1_TARGETS_2_DN                               | 0.43 | 1.83  | 0.00           | 0.11            | Y                      |
| KIM_GLIS2_TARGETS_UP                                  | 0.53 | 1.82  | 0.00           | 0.12            | Y                      |
| HECKER_IFNB1_TARGETS                                  | 0.55 | 1.82  | 0.00           | 0.11            | Y                      |
| KRASNOSELSKAYA_ILF3_TARGETS_UP                        | 0.62 | 1.80  | 0.00           | 0.13            | Y                      |
| SENGUPTA_NASOPHARYNGEAL_CARCINOMA_DN                  | 0.45 | 1.71  | 0.00           | 0.22            | Y                      |
| KIM_BIPOLAR_DISORDER_OLIGODENDROCYTE_DENSITY_CORR_DN  | 0.55 | 1.70  | 0.00           | 0.22            | Y                      |
| VART_KSHV_INFECTION_ANGIOGENIC_MARKERS_UP             | 0.43 | 1.68  | 0.00           | 0.25            | Y                      |
| NAGASHIMA_NRG1_SIGNALING_UP                           | 0.43 | 1.64  | 0.00           | 0.30            | N                      |

*Non-Asian*

| NAME                                             | ES    | NES   | NOM p-value | FDR q-value | Significant (Y/N) |
|--------------------------------------------------|-------|-------|-------------|-------------|-------------------|
| SHAFFER_IRF4_TARGETS_IN_ACTIVATED_DENDRITIC_CELL | -0.61 | -2.17 | 0.00        | 0.07        | Y                 |
| DIRMEIER_LMP1_RESPONSE_LATE_DN                   | -0.65 | -2.04 | 0.00        | 0.14        | Y                 |
| PID_FOXM1PATHWAY                                 | -0.53 | -1.88 | 0.00        | 0.46        | N                 |
| LEE_DIFFERENTIATING_T_LYMPHOCYTE                 | -0.38 | -1.79 | 0.00        | 0.76        | N                 |
| REACTOME_G2_M_CHECKPOINTS                        | -0.58 | -1.78 | 0.01        | 0.66        | N                 |
| SCHLOSSER_SERUM_RESPONSE_UP                      | -0.39 | -1.70 | 0.00        | 0.57        | N                 |
| ZHAN_VARIABLE_EARLY_DIFFERENTIATION_GENES_DN     | -0.53 | -1.69 | 0.01        | 0.55        | N                 |
| REACTOME_MITOTIC_G1_G1_S_PHASES                  | -0.38 | -1.69 | 0.00        | 0.50        | N                 |
| SHEDDEN_LUNG_CANCER_GOOD_SURVIVAL_A12            | -0.35 | -1.68 | 0.00        | 0.49        | N                 |
| HSIAO_LIVER_SPECIFIC_GENES                       | -0.35 | -1.68 | 0.01        | 0.46        | N                 |
| CARD_MIR302A_TARGETS                             | -0.43 | -1.64 | 0.01        | 0.45        | N                 |
| GRADE_COLON_AND_RECTAL_CANCER_DN                 | -0.43 | -1.63 | 0.00        | 0.45        | N                 |
| PEART_HDAC_PROLIFERATION_CLUSTER_DN              | -0.39 | -1.62 | 0.00        | 0.44        | N                 |
| WONG_PROTEASOME_GENE_MODULE                      | -0.43 | -1.52 | 0.01        | 0.53        | N                 |
| HSIAO_HOUSEKEEPING_GENES                         | -0.29 | -1.50 | 0.01        | 0.52        | N                 |
| PUJANA_BRCA2_PCC_NETWORK                         | -0.27 | -1.42 | 0.00        | 0.60        | N                 |
| GRADE_COLON_AND_RECTAL_CANCER_UP                 | -0.29 | -1.40 | 0.00        | 0.62        | N                 |
| TARTE_PLASMA_CELL_VS_PLASMABLAST_DN              | -0.27 | -1.38 | 0.01        | 0.65        | N                 |
| WANG_RESPONSE_TO_GSK3_INHIBITOR_SB216763_DN      | -0.28 | -1.37 | 0.01        | 0.65        | N                 |
| CAIRO_HEPATOBLASTOMA_CLASSES_UP                  | -0.25 | -1.35 | 0.00        | 0.68        | N                 |

**Supplementary Table 7. Top 20 Immunological genesets (C7-MSigDB) from GSEA on RUV-4 results for all Affymetrix platform cohorts ranked by normalised enrichment score (NES)**

| <i>Asian</i>                                               |      |      |             |             |                   |  |
|------------------------------------------------------------|------|------|-------------|-------------|-------------------|--|
| NAME                                                       | ES   | NES  | NOM p-value | FDR q-value | Significant (Y/N) |  |
| GSE30083_SP3_VS_SP4_THYMOCYTE_UP                           | 0.54 | 1.70 | 0.00        | 0.37        | N                 |  |
| GSE9988_ANTI_TREM1_VS_CTRL_TREATED_MONOCYTES_UP            | 0.52 | 1.69 | 0.00        | 0.25        | Y                 |  |
| GSE3982_DC_VS_CENT_MEMORY_CD4_TCELL_UP                     | 0.51 | 1.69 | 0.00        | 0.17        | Y                 |  |
| GSE9988_LPS_VS_LPS_AND_ANTI_TREM1_MONOCYTE_DN              | 0.52 | 1.68 | 0.00        | 0.15        | Y                 |  |
| GSE9006_HEALTHY_VS_TYPE_1_DIABETES_PBMC_AT_DX_DN           | 0.51 | 1.68 | 0.00        | 0.13        | Y                 |  |
| GSE3982_DC_VS_TH2_UP                                       | 0.50 | 1.65 | 0.00        | 0.18        | Y                 |  |
| GSE7852_TREG_VS_TCONV_THYMUS_DN                            | 0.51 | 1.64 | 0.00        | 0.19        | Y                 |  |
| GSE20715_WT_VS_TLR4_KO_LUNG_UP                             | 0.50 | 1.63 | 0.00        | 0.17        | Y                 |  |
| GSE9006_HEALTHY_VS_TYPE_2_DIABETES_PBMC_AT_DX_DN           | 0.49 | 1.62 | 0.00        | 0.22        | Y                 |  |
| GSE24634_NAIVE_CD4_TCELL_VS_DAY3_IL4_CONV_TREG_UP          | 0.48 | 1.58 | 0.00        | 0.31        | N                 |  |
| GSE15930_STIM_VS_STIM_AND_IFNAB_72H_CD8_T_CELL_UP          | 0.49 | 1.58 | 0.00        | 0.29        | N                 |  |
| GSE9988_ANTI_TREM1_VS_VEHICLE_TREATED_MONOCYTES_UP         | 0.49 | 1.58 | 0.00        | 0.28        | N                 |  |
| GSE24142_EARLY_THYMIC_PROGENITOR_VS_DN3_THYMOCYTE_FETAL_UP | 0.48 | 1.55 | 0.00        | 0.37        | N                 |  |
| GSE17721_CPG_VS_GARDIQUIMOD_2H_BMDM_DN                     | 0.48 | 1.55 | 0.00        | 0.37        | N                 |  |
| GSE1460_INTRATHYMIC_T_PROGENITOR_VS_THYMIC_STROMAL_CELL_DN | 0.46 | 1.54 | 0.00        | 0.38        | N                 |  |
| GSE27786_BCELL_VS_NKCELL_DN                                | 0.47 | 1.53 | 0.00        | 0.39        | N                 |  |
| GSE32423_MEMORY_VS_NAIVE_CD8_TCELL_IL7_UP                  | 0.48 | 1.52 | 0.00        | 0.39        | N                 |  |
| GSE24634_TREG_VS_TCONV_POST_DAY10_IL4_CONVERSION_DN        | 0.45 | 1.49 | 0.00        | 0.39        | N                 |  |
| GSE3982_DC_VS_BCELL_UP                                     | 0.45 | 1.49 | 0.00        | 0.38        | N                 |  |
| GSE29618_MONOCYTE_VS_MDC_UP                                | 0.45 | 1.49 | 0.00        | 0.37        | N                 |  |

*Non-Asian*

| NAME                                                                | ES    | NES   | NOM p-value | FDR q-value | Significant (Y/N) |
|---------------------------------------------------------------------|-------|-------|-------------|-------------|-------------------|
| GSE22886_NAIVE_CD4_TCELL_VS_MONOCYTE_UP                             | -0.38 | -1.64 | 0.01        | 0.52        | N                 |
| GSE22886_NAIVE_CD8_TCELL_VS_MONOCYTE_UP                             | -0.35 | -1.55 | 0.02        | 0.60        | N                 |
| GSE24142_EARLY_THYMIC_PROGENITOR_VS_DN2_THYMOCYTE_FETAL_DN          | -0.34 | -1.46 | 0.03        | 0.85        | N                 |
| GSE17974_IL4_AND_ANTI_IL12_VS_UNTREATED_72H_ACT_CD4_TCELL_UP        | -0.34 | -1.45 | 0.05        | 0.69        | N                 |
| GSE29614_CTRL_VS_DAY3_TIV_FLU_VACCINE_PBMC_UP                       | -0.37 | -1.43 | 0.05        | 0.66        | N                 |
| GSE9006_TYPE_1_VS_TYPE_2_DIABETES_PBMC_AT_DX_UP                     | -0.30 | -1.42 | 0.00        | 0.62        | N                 |
| GSE22886_IGG_IGA_MEMORY_BCELL_VS_BM_PLASMA_CELL_UP                  | -0.31 | -1.41 | 0.02        | 0.58        | N                 |
| GSE10325_BCELL_VS_MYELOID_UP                                        | -0.31 | -1.40 | 0.00        | 0.52        | N                 |
| GSE39820_TGFBETA1_VS_TGFBETA3_IN_IL6_IL23A_TREATED_CD4_TCELL_D<br>N | -0.32 | -1.39 | 0.05        | 0.49        | N                 |
| GSE3982_MAC_VS_TH2_DN                                               | -0.30 | -1.39 | 0.00        | 0.46        | N                 |
| GSE17974_CTRL_VS_ACT_IL4_AND_ANTI_IL12_0.5H_CD4_TCELL_UP            | -0.34 | -1.37 | 0.06        | 0.48        | N                 |
| GSE22886_TCELL_VS_BCELL_NAIVE_UP                                    | -0.29 | -1.34 | 0.00        | 0.55        | N                 |
| GSE9006_1MONTH_VS_4MONTH_POST_TYPE_1_DIABETES_DX_PBMC_DN            | -0.30 | -1.32 | 0.06        | 0.62        | N                 |
| GSE8515_IL1_VS_IL6_4H_STIM)MAC_DN                                   | -0.29 | -1.30 | 0.05        | 0.64        | N                 |
| GSE22886_NAIVE_TCELL_VS_MONOCYTE_UP                                 | -0.30 | -1.30 | 0.09        | 0.61        | N                 |
| GSE12366_NAIVE_VS_MEMORY_BCELL_UP                                   | -0.30 | -1.26 | 0.12        | 0.80        | N                 |
| GSE17721_LPS_VS_POLYIC_0.5H_BMDM_UP                                 | -0.27 | -1.25 | 0.04        | 0.78        | N                 |
| GSE3982_EFF_MEMORY_VS_CENT_MEMORY_CD4_TCELL_UP                      | -0.28 | -1.25 | 0.09        | 0.77        | N                 |
| GSE10325_CD4_TCELL_VS_MYELOID_UP                                    | -0.26 | -1.20 | 0.11        | 0.96        | N                 |
| GSE1460_CD4_THYMOCYTE_VS_NAIVE_CD4_TCELL_ADULT_BLOOD_DN             | -0.26 | -1.19 | 0.11        | 0.96        | N                 |

**Supplementary Table 8. MSigDB C7 T-cell signature genesets enriched in Stage-1 meta-analysis**

| <b>MSigDB.geneset.name</b>                                   | <b>web.path</b>                                                                                                                                                                                                                         |
|--------------------------------------------------------------|-----------------------------------------------------------------------------------------------------------------------------------------------------------------------------------------------------------------------------------------|
| GSE1460_INTRATHYMIC_T_PROGENITOR_VS_THYMIC_STROMAL_CELL_DN   | <a href="http://www.broadinstitute.org/gsea/msigdb/cards/GSE1460_INTRATHYMIC_T_PROGENITOR_VS_THYMIC_STROMAL_CELL_DN">http://www.broadinstitute.org/gsea/msigdb/cards/GSE1460_INTRATHYMIC_T_PROGENITOR_VS_THYMIC_STROMAL_CELL_DN</a>     |
| GSE3982_MAC_VS_TH2_DN                                        | <a href="http://www.broadinstitute.org/gsea/msigdb/cards/GSE3982_MAC_VS_TH2_DN">http://www.broadinstitute.org/gsea/msigdb/cards/GSE3982_MAC_VS_TH2_DN</a>                                                                               |
| GSE22886_TCELL_VS_BCELL_NAIVE_UP                             | <a href="http://www.broadinstitute.org/gsea/msigdb/cards/GSE22886_TCELL_VS_BCELL_NAIVE_UP">http://www.broadinstitute.org/gsea/msigdb/cards/GSE22886_TCELL_VS_BCELL_NAIVE_UP</a>                                                         |
| GSE24634_NAIVE_CD4_TCELL_VS_DAY3_IL4_CONV_TREG_UP            | <a href="http://www.broadinstitute.org/gsea/msigdb/cards/GSE24634_NAIVE_CD4_TCELL_VS_DAY3_IL4_CONV_TREG_UP">http://www.broadinstitute.org/gsea/msigdb/cards/GSE24634_NAIVE_CD4_TCELL_VS_DAY3_IL4_CONV_TREG_UP</a>                       |
| GSE22886_NAIVE_CD8_TCELL_VS_MONOCYTE_UP                      | <a href="http://www.broadinstitute.org/gsea/msigdb/cards/GSE22886_NAIVE_CD8_TCELL_VS_MONOCYTE_UP">http://www.broadinstitute.org/gsea/msigdb/cards/GSE22886_NAIVE_CD8_TCELL_VS_MONOCYTE_UP</a>                                           |
| GSE22886_NAIVE_CD4_TCELL_VS_MONOCYTE_UP                      | <a href="http://www.broadinstitute.org/gsea/msigdb/cards/GSE22886_NAIVE_CD4_TCELL_VS_MONOCYTE_UP">http://www.broadinstitute.org/gsea/msigdb/cards/GSE22886_NAIVE_CD4_TCELL_VS_MONOCYTE_UP</a>                                           |
| GSE24142_EARLY_THYMIC_PROGENITOR_VS_DN2_THYMOCYTE_FETAL_DN   | <a href="http://www.broadinstitute.org/gsea/msigdb/cards/GSE24142_EARLY_THYMIC_PROGENITOR_VS_DN2_THYMOCYTE_FETAL_DN">http://www.broadinstitute.org/gsea/msigdb/cards/GSE24142_EARLY_THYMIC_PROGENITOR_VS_DN2_THYMOCYTE_FETAL_DN</a>     |
| GSE17974_IL4_AND_ANTI_IL12_VS_UNTREATED_72H_ACT_CD4_TCELL_UP | <a href="http://www.broadinstitute.org/gsea/msigdb/cards/GSE17974_IL4_AND_ANTI_IL12_VS_UNTREATED_72H_ACT_CD4_TCELL_UP">http://www.broadinstitute.org/gsea/msigdb/cards/GSE17974_IL4_AND_ANTI_IL12_VS_UNTREATED_72H_ACT_CD4_TCELL_UP</a> |
| GSE24142_EARLY_THYMIC_PROGENITOR_VS_DN3_THYMOCYTE_FETAL_UP   | <a href="http://www.broadinstitute.org/gsea/msigdb/cards/GSE24142_EARLY_THYMIC_PROGENITOR_VS_DN3_THYMOCYTE_FETAL_UP">http://www.broadinstitute.org/gsea/msigdb/cards/GSE24142_EARLY_THYMIC_PROGENITOR_VS_DN3_THYMOCYTE_FETAL_UP</a>     |



**Supplementary Table 9. Clinical characteristics of immunohistochemistry study cohorts**

| <b>Total n = 665</b>                                 | <b>Japanese (n = 219)</b> | <b>Caucasian (n = 446)</b> | <b>P-value<sup>†††</sup></b>     |
|------------------------------------------------------|---------------------------|----------------------------|----------------------------------|
| <b>Age (years)</b>                                   |                           |                            |                                  |
| Range                                                | 36.0 - 85.0               | 13.5 - 96.0 (1 missing)    |                                  |
| mean ± standard deviation                            | 63.7 ± 10.7               | 67.3 ± 12.7                | < 0.001 <sup>α</sup>             |
| <b>Gender (percent)</b>                              |                           |                            |                                  |
| Female                                               | 61 (27.9)                 | 171 (38.3)                 | < 0.001 <sup>β</sup>             |
| Male                                                 | 158 (72.1)                | 275 (61.7)                 | < 0.001 <sup>β</sup>             |
| <b>Stage<sup>‡</sup> (percent)</b>                   |                           |                            |                                  |
| I                                                    | 1 (0.46)                  | 89 (20.0)                  | < 0.001 <sup>β</sup>             |
| II                                                   | 80 (36.5)                 | 113 (25.3)                 | < 0.001 <sup>β</sup>             |
| III                                                  | 126 (57.5)                | 229 (51.3)                 | 0.08 <sup>β</sup>                |
| IV                                                   | 12 (5.48)                 | 15 (3.36)                  | 0.12 <sup>β</sup>                |
| <b>Lauren's classification (percent)</b>             |                           |                            |                                  |
| Intestinal                                           | 78 (35.6)                 | 266 (59.6)                 | < 0.001 <sup>β*</sup>            |
| Diffuse                                              | 128 (58.4)                | 123 (27.6)                 | < 0.001 <sup>β*</sup>            |
| Mixed/ unclassifiable                                | 12 (5.48)                 | 56 (12.6)                  | < 0.001 <sup>β*</sup>            |
| Missing                                              | 1 (0.46)                  | 1 (0.22)                   |                                  |
| <b>Treatment (percent)</b>                           |                           |                            |                                  |
| Surgery only                                         | 92 (42.0)                 | 440 (98.7)                 | < 0.001 <sup>β</sup>             |
| Surgery + chemotherapy                               | 127 <sup>†</sup> (58.0)   | 6 (1.35)                   | < 0.001 <sup>β</sup>             |
| <b>Tumour location (percent)</b>                     |                           |                            |                                  |
| Upper third                                          | 66 (30.1)                 | 117 (26.2)                 | 0.93 <sup>β*</sup>               |
| Middle third                                         | 89 (40.6)                 | 75 (16.8)                  | < 0.001 <sup>β*</sup>            |
| Lower third                                          | 64 (29.2)                 | 190 (42.6)                 | < 0.001 <sup>β*</sup>            |
| Missing                                              | -                         | 64 (14.3)                  |                                  |
| <b>Tumour differentiation (percent)</b>              |                           |                            |                                  |
| Well differentiated (G1)                             | 21 (9.59)                 | 53 (11.9)                  | 0.33 <sup>β*</sup>               |
| Moderately differentiated (G2)                       | 82 (37.4)                 | 117 (26.2)                 | < 0.001 <sup>β*</sup>            |
| Poorly differentiated (G3)                           | 115 (52.5)                | 271 (60.8)                 | 0.01 <sup>β*</sup>               |
| Missing                                              | 1 (0.46)                  | 5 (1.12)                   |                                  |
| <b>Epstein Barr Virus status (percent)</b>           |                           |                            |                                  |
| Positive                                             | 12 (5.48)                 | 15 (3.36)                  | 0.13 <sup>β*</sup>               |
| Negative                                             | 204 (93.2)                | 422 (94.6)                 | 0.13 <sup>β*</sup>               |
| Missing                                              | 3 (1.37)                  | 9 (2.02)                   | 0.65 <sup>β*</sup>               |
| <b>Mismatch Repair status<sup>Δ</sup> (percent)</b>  |                           |                            |                                  |
| Proficient                                           | 195 (89.0)                | 162 (36.3)                 | 0.25 <sup>β</sup>                |
| Deficient                                            | 21 (9.59)                 | 13 (2.91)                  | 0.25 <sup>β</sup>                |
| <b>Year of surgery range (median)</b>                | 2001-2010 (2005)          | 1970-2004 (1996)           | < 0.001 < 2 x 10 <sup>-16γ</sup> |
| <b>Median overall survival<sup>††</sup> (months)</b> | 38.7                      | 22.7 (21 missing)          | 2 x 10 <sup>-05γ*</sup>          |
| <b>Number of overall death events</b>                | 78                        | 312 (22 missing)           | 2 x 10 <sup>-04α*</sup>          |

<sup>‡</sup>American Joint Committee on Cancer (AJCC) staging 7<sup>th</sup> edition

<sup>†</sup>5FU-related chemotherapy

<sup>†††</sup>P-value from hypothesis testing between Japanese and Caucasian cohorts

<sup>‡</sup>t-test

<sup>αβ</sup> or Chi-square proportion test

<sup>β</sup> or <sup>γ</sup>Wilcoxon rank sum test<sup>γ</sup> employed.

<sup>\*</sup>Excluding missing values

<sup>Δ</sup> Not performed in all cases; results from previous report of MMR status {van Grieken, 2013 #166}

<sup>††</sup>Defined as time from surgery to last follow-up

**Supplementary Table 10. Assessment of immune markers between Caucasian (total n = 446) and Japanese cohorts (total n = 219)**

| Marker        | Caucasian                                              |                                              |              | Japanese                                               |                                              |              | p-value <sup>‡</sup>  | trend      |
|---------------|--------------------------------------------------------|----------------------------------------------|--------------|--------------------------------------------------------|----------------------------------------------|--------------|-----------------------|------------|
|               | unadj. mean ± s.d.<br>(adj. mean ± s.d. <sup>†</sup> ) | unadj. median<br>(adj. median <sup>†</sup> ) | n per marker | unadj. mean ± s.d.<br>(adj. mean ± s.d. <sup>†</sup> ) | unadj. median<br>(adj. median <sup>†</sup> ) | n per marker |                       |            |
| <b>CD45</b>   | 37.3 ± 23.7 (20.8 ± 65.3)                              | 37.3 (0.82)                                  | 351          | 46.4 ± 16.8 (1.52 ± 1.30)                              | 47.0 (1.20)                                  | 219          | 2 x 10 <sup>-03</sup> | ↑Japanese  |
| <b>CD45RO</b> | 34.9 ± 20.8 (13.9 ± 36.9)                              | 30.4 (0.90)                                  | 345          | 19.8 ± 11.6 (0.60 ± 0.60)                              | 19.0 (0.47)                                  | 219          | 9 x 10 <sup>-15</sup> | ↑Caucasian |
| <b>CD3</b>    | 10.3 ± 9.44 (2.42 ± 15.3)                              | 7.82 (0.22)                                  | 197          | 6.68 ± 5.15 (0.21 ± 0.25)                              | 5.72 (0.13)                                  | 219          | 4 x 10 <sup>-06</sup> | ↑Caucasian |
| <b>CD8</b>    | 18.8 ± 15.4 (6.54 ± 24.5)                              | 14.6 (0.38)                                  | 269          | 9.59 ± 7.26 (0.31 ± 0.30)                              | 7.96 (0.21)                                  | 219          | 6 x 10 <sup>-07</sup> | ↑Caucasian |
| <b>FOXP3</b>  | 7.08 ± 11.2 (2.24 ± 6.76)                              | 2.15 (0.03)                                  | 250          | 7.79 ± 10.7 (0.24 ± 0.32)                              | 5.57 (0.14)                                  | 219          | 6 x 10 <sup>-08</sup> | ↑Japanese  |
| <b>CD68</b>   | 9.29 ± 5.64 (1.53 ± 7.04)                              | 8.55 (0.24)                                  | 197          | 7.46 ± 4.14 (0.22 ± 0.17)                              | 6.48 (0.17)                                  | 219          | 4 x 10 <sup>-04</sup> | ↑Caucasian |
| <b>CD66b</b>  | 4.93 ± 6.96 (0.51 ± 2.11)                              | 2.55 (0.09)                                  | 197          | 8.49 ± 8.56 (0.26 ± 0.34)                              | 5.33 (0.15)                                  | 219          | 2 x 10 <sup>-05</sup> | ↑Japanese  |

<sup>†</sup>data adjusted for tumour content using CK staining values

<sup>‡</sup>2-sided p-value from Wilcoxon Mann-Whitney test for adjusted median

**Supplementary Table 11. Generalized linear model of Overall survival time against CD68/CD3 ratio and covariates significantly associated with survival**

| Variable                                        | Regression estimate, $\beta$ | Std. error | P-value             |
|-------------------------------------------------|------------------------------|------------|---------------------|
| CD68/CD3 ratio                                  | -0.141                       | 0.05       | $9 \times 10^{-03}$ |
| UICC TNM7 stage (II vs I)                       | -0.241                       | 0.14       | 0.09                |
| UICC TNM7 stage (III vs I)                      | -0.608                       | 0.14       | $2 \times 10^{-05}$ |
| UICC TNM7 stage (IV vs I)                       | -1.05                        | 0.21       | $7 \times 10^{-07}$ |
| Locality (Japanese vs Caucasian)                | 0.621                        | 0.12       | $7 \times 10^{-07}$ |
| Chemotherapy (No vs Yes)                        | -0.044                       | 0.10       | 0.65                |
| EBV (Positive vs Negative)                      | 0.385                        | 0.15       | 0.01                |
| Tumour location (Middle Third vs Upper Third)   | 0.077                        | 0.09       | 0.37                |
| Tumour location (Lower Third vs Upper Third)    | 0.055                        | 0.08       | 0.51                |
| Tumour location (Others vs Upper Third)         | -0.404                       | 0.20       | 0.04                |
| Lauren's classification (Diffuse vs Intestinal) | -0.054                       | 0.10       | 0.58                |
| Lauren's classification (Mixed vs Intestinal)   | -0.033                       | 0.12       | 0.79                |
| Tumour differentiation grade (G2 vs G1)         | -0.058                       | 0.12       | 0.62                |
| Tumour differentiation grade (G3 vs G1)         | -0.110                       | 0.13       | 0.40                |
| Age                                             | -0.003                       | 0.003      | 0.37                |
| Year of surgery                                 | -0.035                       | 0.01       | $7 \times 10^{-03}$ |

negative  $\beta$  refers to a negative trend with overall survival e.g. higher CD68/CD3 has a trend for shorter overall survival ( $\beta = -0.141$ ), while positive  $\beta$  refers to a positive trend with overall survival e.g. the Japanese cohort has a longer overall survival compared to Caucasian cohort ( $\beta = 0.621$ ).



**Supplementary Table 12. Restricted Mean Survival Time (RMST) at 1-year (12-months), 5-year (60-months) and 10-year (120-months) intervals**

| Dataset   | Group (n)          | RMST ± s.e. (12-months) | RMST ± s.e. (60-months) | RMST ± s.e. (120-months) | Renyi test p-value (p=1; q=1) | Renyi test p-value (p=0; q=1) |
|-----------|--------------------|-------------------------|-------------------------|--------------------------|-------------------------------|-------------------------------|
| AMS_cDNA  | CD68/CD3 low (24)  | 8.89 ± 0.688            | 24.7 ± 4.920            | 39.1 ± 10.09             | < 1 x 10 <sup>-05</sup>       | 8 x 10 <sup>-03</sup>         |
|           | CD68/CD3 high (4)  | 7.89 ± 2.094            | 10.7 ± 3.460            | 10.7 ± 3.460             |                               |                               |
| SGset2    | CD68/CD3 low (36)  | 11.8 ± 0.137            | 40.1 ± 3.850            | 72.4 ± 9.110             | < 1 x 10 <sup>-05</sup>       | < 1 x 10 <sup>-05</sup>       |
|           | CD68/CD3 high (3)  | 12.0 ± 0.000            | 27.8 ± 3.380            | 27.8 ± 3.380             |                               |                               |
| SamsungMC | CD68/CD3 low (380) | 11.8 ± 0.040            | 48.7 ± 0.903            | 85.4 ± 2.310             | < 1 x 10 <sup>-05</sup>       | 2 x 10 <sup>-05</sup>         |
|           | CD68/CD3 high (52) | 11.7 ± 0.166            | 46.9 ± 2.689            | 77.1 ± 6.640             |                               |                               |
| SGset1    | CD68/CD3 low (126) | 10.7 ± 0.239            | 35.4 ± 2.120            | 56.2 ± 4.520             | < 1 x 10 <sup>-05</sup>       | 2 x 10 <sup>-04</sup>         |
|           | CD68/CD3 high (14) | 8.65 ± 1.080            | 27.9 ± 7.230            | 51.5 ± 15.33             |                               |                               |
| HK_cDNA   | CD68/CD3 low (72)  | 10.4 ± 0.364            | 33.3 ± 2.900            | 55.3 ± 6.850             | 3 x 10 <sup>-04</sup>         | 0.04                          |
|           | CD68/CD3 high (12) | 11.2 ± 0.718            | 33.2 ± 6.210            | 48.2 ± 16.72             |                               |                               |
| YGC       | CD68/CD3 low (59)  | 11.5 ± 0.257            | 45.7 ± 2.760            | 83.1 ± 7.270             | < 1 x 10 <sup>-05</sup>       | < 1 x 10 <sup>-05</sup>       |
|           | CD68/CD3 high (6)  | 12.0 ± 0.000            | 54.7 ± 4.820            | 104.7 ± 13.95            |                               |                               |

Blue box: worse survival in CD68/CD3 low

Black box: worse survival in CD68/CD3 high

**Supplementary Table 13. Correlation<sup>†</sup> of immune markers with other clinicopathologic factors**

| Immune marker | Stage               |                     | Age                  |         | Epstein Barr Virus status |                     | Mismatch repair status |                     | Tumour differentiation grade |                      |
|---------------|---------------------|---------------------|----------------------|---------|---------------------------|---------------------|------------------------|---------------------|------------------------------|----------------------|
|               | $r_s$               | P-value             | $r_s$                | P-value | $r_s$                     | P-value             | $r_s$                  | P-value             | $r_s$                        | P-value              |
| CD3           | 0.02                | 0.74                | -0.08                | 0.10    | 0.16                      | $9 \times 10^{-04}$ | 0.13                   | 0.02                | 0.26                         | $1 \times 10^{-07}$  |
| CD8           | 0.05                | 0.31                | -0.01                | 0.81    | 0.11                      | 0.02                | 0.04                   | 0.47                | 0.22                         | $10 \times 10^{-07}$ |
| CD68          | 0.13                | $6 \times 10^{-03}$ | -0.08                | 0.12    | 0.01                      | 0.78                | 0.16                   | $4 \times 10^{-03}$ | 0.34                         | $2 \times 10^{-12}$  |
| CD66b         | -0.01               | 0.81                | -0.05                | 0.30    | 0.05                      | 0.28                | -0.08                  | 0.14                | 0.02                         | 0.73                 |
| CD45R0        | $2 \times 10^{-03}$ | 0.96                | -0.04                | 0.33    | 0.12                      | $4 \times 10^{-03}$ | 0.03                   | 0.63                | 0.11                         | $10 \times 10^{-03}$ |
| FOXP3         | -0.04               | 0.38                | -0.03                | 0.49    | 0.03                      | 0.59                | 0.13                   | 0.03                | 0.02                         | 0.67                 |
| CD68/CD3      | 0.13                | $7 \times 10^{-03}$ | $-7 \times 10^{-03}$ | 0.89    | -0.14                     | $5 \times 10^{-03}$ | 0.04                   | 0.53                | 0.08                         | 0.11                 |

<sup>†</sup>Spearman rank correlation with continuity correction

<sup>‡</sup>Positive Spearman rho relates to positive correlation (e.g. higher CD3 is positively correlated with positive EBV status), while negative Spearman rho relates to negative correlation (e.g. higher CD68/CD3 is negatively correlated with positive EBV status)

**Supplementary Table 14. Clinical characteristics of original cohorts from which immunohistochemical study cohorts are derived**

| <b>Total n = 1,159</b>                               | <b>Japanese (n = 253)</b> | <b>Caucasian (n = 906)</b> | <b>P-value<sup>†††</sup></b> |
|------------------------------------------------------|---------------------------|----------------------------|------------------------------|
| <b>Age (years)</b>                                   |                           |                            |                              |
| Range                                                | 35.0 - 85.0               | 13.5 - 96.0 (6 missing)    |                              |
| mean ± standard deviation                            | 63.0 ± 11.1               | 68.1 ± 11.7                | < 0.001 <sup>α*</sup>        |
| <b>Gender (percent)</b>                              |                           |                            |                              |
| Female                                               | 75 (29.6)                 | 314 (34.7)                 | 0.10 <sup>β*</sup>           |
| Male                                                 | 178 (70.4)                | 589 (65.0)                 | 0.10 <sup>β*</sup>           |
| Missing                                              | -                         | 3 (0.33)                   |                              |
| <b>Stage<sup>‡</sup> (percent)</b>                   |                           |                            |                              |
| 1                                                    | 1 (0.40)                  | 158 (17.4)                 | < 0.001 <sup>β*</sup>        |
| 2                                                    | 97 (38.3)                 | 250 (27.6)                 | < 0.001 <sup>β*</sup>        |
| 3                                                    | 141 (55.7)                | 464 (51.2)                 | 0.26 <sup>β*</sup>           |
| 4                                                    | 14 (5.53)                 | 20 (2.21)                  | < 0.001 <sup>β*</sup>        |
| Missing                                              | -                         | 14 (1.55)                  |                              |
| <b>Lauren's classification (percent)</b>             |                           |                            |                              |
| Intestinal                                           | 84 (33.2)                 | 532 (58.7)                 | < 0.001 <sup>6β*</sup>       |
| Diffuse                                              | 156 (61.7)                | 212 (23.4)                 | < 0.001 <sup>β*</sup>        |
| Mixed/ unclassifiable                                | 12 (4.74)                 | 105 (11.6)                 | < 0.001 <sup>β*</sup>        |
| Missing                                              | 1 (0.40)                  | 57 (6.29)                  |                              |
| <b>Treatment (percent)</b>                           |                           |                            |                              |
| Surgery only                                         | 110 (43.5)                | 844 (93.2)                 | < 0.001 <sup>β</sup>         |
| Surgery + chemotherapy                               | 143 <sup>†</sup> (56.5)   | 62 (6.84)                  | < 0.001 <sup>β</sup>         |
| <b>Median overall survival<sup>††</sup> (months)</b> |                           |                            |                              |
|                                                      | 40.2                      | 20.0 (39 missing)          | < 0.001 <sup>γ*</sup>        |
| <b>Number of overall death events</b>                |                           |                            |                              |
|                                                      | 89                        | 640 (44 missing)           | < 0.001 <sup>β*</sup>        |

<sup>‡</sup>American Joint Committee on Cancer (AJCC) staging 7<sup>th</sup> edition

<sup>†</sup>5FU-related chemotherapy

<sup>††</sup>Defined as time from surgery to last follow-up

<sup>†††</sup>P-value from hypothesis testing between Japanese and Caucasian cohorts

<sup>α</sup> t-test

<sup>β</sup>Chi-square proportion test

<sup>γ</sup>Wilcoxon rank sum test.

<sup>\*</sup>Excluding missing values

**Supplementary Table 15. Top 20 Curated genesets (C6-MSigDB) from GSEA (before & after RUV-4) ranked by normalised enrichment score (NES)**

| RUV-4 results for all Affymetrix platform cohorts (before RUV4) |      |       |                |                 |                        |  |
|-----------------------------------------------------------------|------|-------|----------------|-----------------|------------------------|--|
| <i>Asian</i>                                                    |      |       |                |                 |                        |  |
| NAME                                                            | ES*  | NES** | NOM p-value*** | FDR q-value**** | Significant (Y/N)***** |  |
| VEGF_A_UP.V1_DN                                                 | 0.46 | 1.65  | 0.00           | 0.14            | Y                      |  |
| PIGF_UP.V1_UP                                                   | 0.44 | 1.59  | 0.00           | 0.17            | Y                      |  |
| HOXA9_DN.V1_DN                                                  | 0.45 | 1.59  | 0.00           | 0.13            | Y                      |  |
| ERB2_UP.V1_DN                                                   | 0.44 | 1.58  | 0.00           | 0.11            | Y                      |  |
| CRX_NRL_DN.V1_DN                                                | 0.46 | 1.47  | 0.01           | 0.35            | N                      |  |
| CAMP_UP.V1_UP                                                   | 0.41 | 1.46  | 0.00           | 0.35            | N                      |  |
| TBK1.DF_DN                                                      | 0.40 | 1.45  | 0.00           | 0.35            | N                      |  |
| SIRNA_EIF4GI_DN                                                 | 0.43 | 1.40  | 0.04           | 0.50            | N                      |  |
| ATF2_S_UP.V1_UP                                                 | 0.40 | 1.37  | 0.04           | 0.66            | N                      |  |
| PDGF_ERK_DN.V1_DN                                               | 0.40 | 1.36  | 0.03           | 0.66            | N                      |  |
| RAF_UP.V1_UP                                                    | 0.38 | 1.35  | 0.04           | 0.67            | N                      |  |
| TGFB_UP.V1_DN                                                   | 0.39 | 1.35  | 0.04           | 0.62            | N                      |  |
| MTOR_UP.N4.V1_UP                                                | 0.38 | 1.34  | 0.04           | 0.61            | N                      |  |
| RB_P107_DN.V1_UP                                                | 0.39 | 1.34  | 0.06           | 0.59            | N                      |  |
| EGFR_UP.V1_DN                                                   | 0.38 | 1.34  | 0.04           | 0.55            | N                      |  |
| RAF_UP.V1_DN                                                    | 0.38 | 1.32  | 0.04           | 0.60            | N                      |  |
| STK33_UP                                                        | 0.36 | 1.31  | 0.03           | 0.63            | N                      |  |
| LTE2_UP.V1_UP                                                   | 0.37 | 1.30  | 0.05           | 0.63            | N                      |  |
| GCNP_SHH_UP_LATE.V1_UP                                          | 0.37 | 1.29  | 0.08           | 0.65            | N                      |  |
| TBK1.DF_UP                                                      | 0.35 | 1.27  | 0.06           | 0.76            | N                      |  |



*Non-Asian*

| NAME                          | ES    | NES   | NOM p-value | FDR q-value | Significant (Y/N) |
|-------------------------------|-------|-------|-------------|-------------|-------------------|
| KRAS.PROSTATE_UP.V1_DN        | -0.34 | -1.77 | 0.00        | 0.07        | Y                 |
| JAK2_DN.V1_DN                 | -0.35 | -1.66 | 0.00        | 0.07        | Y                 |
| KRAS.300_UP.V1_DN             | -0.29 | -1.49 | 0.03        | 0.17        | Y                 |
| PTEN_DN.V2_UP                 | -0.26 | -1.38 | 0.00        | 0.27        | N                 |
| CSR_EARLY_UP.V1_DN            | -0.27 | -1.28 | 0.15        | 0.42        | N                 |
| EIF4E_DN                      | -0.26 | -1.27 | 0.04        | 0.38        | N                 |
| RELA_DN.V1_DN                 | -0.24 | -1.27 | 0.16        | 0.33        | N                 |
| CTIP_DN.V1_DN                 | -0.27 | -1.24 | 0.17        | 0.36        | N                 |
| CAHOY_OLIGODENDROCUTIC        | -0.27 | -1.19 | 0.21        | 0.43        | N                 |
| PKCA_DN.V1_UP                 | -0.20 | -1.04 | 0.42        | 0.91        | N                 |
| E2F3_UP.V1_DN                 | -0.21 | -1.02 | 0.40        | 0.93        | N                 |
| KRAS.AMP.LUNG_UP.V1_UP        | -0.23 | -1.01 | 0.38        | 0.89        | N                 |
| IL21_UP.V1_DN                 | -0.20 | -0.97 | 0.62        | 0.99        | N                 |
| KRAS.600_UP.V1_DN             | -0.18 | -0.92 | 0.67        | 1.00        | N                 |
| KRAS.LUNG.BREAST_UP.V1_DN     | -0.18 | -0.89 | 0.59        | 1.00        | N                 |
| DCA_UP.V1_DN                  | -0.16 | -0.84 | 0.78        | 1.00        | N                 |
| KRAS.BREAST_UP.V1_DN          | -0.17 | -0.79 | 0.82        | 1.00        | N                 |
| KRAS.PROSTATE_UP.V1_UP        | -0.16 | -0.78 | 0.87        | 1.00        | N                 |
| ALK_DN.V1_UP                  | -0.15 | -0.77 | 0.81        | 1.00        | N                 |
| KRAS.600.LUNG.BREAST_UP.V1_DN | -0.13 | -0.75 | 0.93        | 0.98        | N                 |

**Supplementary Table 15. Top 20 Curated genesets (C6-MSigDB) from GSEA (before & after RUV-4) ranked by normalised enrichment score (NES)**

| RUV-4 results for all Affymetrix platform cohorts (after RUV4) |      |       |                |                 |                        |  |
|----------------------------------------------------------------|------|-------|----------------|-----------------|------------------------|--|
| <i>Asian</i>                                                   |      |       |                |                 |                        |  |
| NAME                                                           | ES*  | NES** | NOM p-value*** | FDR q-value**** | Significant (Y/N)***** |  |
| STK33_UP                                                       | 0.51 | 1.72  | 0.00           | 0.04            | Y                      |  |
| SNF5_DN.V1_DN                                                  | 0.50 | 1.59  | 0.00           | 0.19            | Y                      |  |
| STK33_SKM_UP                                                   | 0.47 | 1.57  | 0.00           | 0.19            | Y                      |  |
| BRCA1_DN.V1_UP                                                 | 0.55 | 1.56  | 0.02           | 0.16            | Y                      |  |
| STK33_NOMO_UP                                                  | 0.45 | 1.52  | 0.01           | 0.24            | Y                      |  |
| LTE2_UP.V1_DN                                                  | 0.45 | 1.49  | 0.00           | 0.27            | N                      |  |
| VEGF_A_UP.V1_DN                                                | 0.45 | 1.48  | 0.01           | 0.26            | N                      |  |
| PIGF_UP.V1_DN                                                  | 0.45 | 1.46  | 0.01           | 0.30            | N                      |  |
| CTIP_DN.V1_UP                                                  | 0.50 | 1.45  | 0.04           | 0.33            | N                      |  |
| CRX_DN.V1_DN                                                   | 0.47 | 1.43  | 0.04           | 0.34            | N                      |  |
| P53_DN.V1_DN                                                   | 0.43 | 1.43  | 0.01           | 0.33            | N                      |  |
| LEF1_UP.V1_UP                                                  | 0.43 | 1.42  | 0.02           | 0.33            | N                      |  |
| CRX_NRL_DN.V1_DN                                               | 0.47 | 1.40  | 0.05           | 0.38            | N                      |  |
| TBK1.DF_DN                                                     | 0.40 | 1.35  | 0.03           | 0.55            | N                      |  |
| MTOR_UP.N4.V1_DN                                               | 0.43 | 1.35  | 0.06           | 0.52            | N                      |  |
| E2F1_UP.V1_DN                                                  | 0.41 | 1.34  | 0.05           | 0.50            | N                      |  |
| TGFB_UP.V1_UP                                                  | 0.42 | 1.34  | 0.05           | 0.47            | N                      |  |
| PIGF_UP.V1_UP                                                  | 0.40 | 1.34  | 0.04           | 0.48            | N                      |  |
| EGFR_UP.V1_UP                                                  | 0.40 | 1.33  | 0.05           | 0.49            | N                      |  |
| MEK_UP.V1_DN                                                   | 0.40 | 1.30  | 0.06           | 0.54            | N                      |  |

*Non-Asian*

| NAME                          | ES    | NES   | NOM p-value | FDR q-value | Significant (Y/N) |
|-------------------------------|-------|-------|-------------|-------------|-------------------|
| KRAS.PROSTATE_UP.V1_DN        | -0.47 | -1.96 | 0.00        | 0.03        | Y                 |
| KRAS.300_UP.V1_DN             | -0.45 | -1.87 | 0.00        | 0.03        | Y                 |
| KRAS.600_UP.V1_DN             | -0.37 | -1.73 | 0.00        | 0.05        | Y                 |
| RAF_UP.V1_DN                  | -0.33 | -1.52 | 0.00        | 0.17        | Y                 |
| KRAS.600.LUNG.BREAST_UP.V1_DN | -0.32 | -1.48 | 0.00        | 0.18        | Y                 |
| STK33_SKM_DN                  | -0.31 | -1.43 | 0.00        | 0.19        | Y                 |
| BCAT_BILD_ET_AL_UP            | -0.43 | -1.42 | 0.08        | 0.19        | Y                 |
| STK33_DN                      | -0.31 | -1.41 | 0.05        | 0.17        | Y                 |
| RELA_DN.V1_DN                 | -0.34 | -1.38 | 0.06        | 0.19        | Y                 |
| ESC_J1_UP_EARLY.V1_UP         | -0.33 | -1.37 | 0.05        | 0.18        | Y                 |
| IL15_UP.V1_DN                 | -0.33 | -1.31 | 0.11        | 0.24        | Y                 |
| KRAS.LUNG_UP.V1_DN            | -0.31 | -1.31 | 0.10        | 0.22        | Y                 |
| KRAS.BREAST_UP.V1_UP          | -0.33 | -1.30 | 0.10        | 0.21        | Y                 |
| LEF1_UP.V1_DN                 | -0.28 | -1.27 | 0.10        | 0.23        | Y                 |
| PTEN_DN.V2_UP                 | -0.29 | -1.24 | 0.10        | 0.26        | N                 |
| CAHOY_NEURONAL                | -0.32 | -1.17 | 0.24        | 0.38        | N                 |
| KRAS.LUNG.BREAST_UP.V1_DN     | -0.28 | -1.14 | 0.18        | 0.43        | N                 |
| KRAS.LUNG.BREAST_UP.V1_UP     | -0.27 | -1.12 | 0.22        | 0.45        | N                 |
| BCAT_GDS748_UP                | -0.31 | -1.12 | 0.30        | 0.44        | N                 |
| KRAS.300_UP.V1_UP             | -0.25 | -1.06 | 0.32        | 0.53        | N                 |

**Supplementary Table 16. Assessment of Ki-67 marker between Caucasian and Japanese cohorts**

| Marker | Caucasian                |                     | Japanese                 |                     | p-value <sup>‡</sup> | trend      |
|--------|--------------------------|---------------------|--------------------------|---------------------|----------------------|------------|
|        | mean ± s.d. <sup>†</sup> | median <sup>†</sup> | mean ± s.d. <sup>†</sup> | median <sup>†</sup> |                      |            |
| Ki67   | 4.75 ± 25.9              | 0.628               | 0.858 ± 0.726            | 0.565               | 8.27E-01             | ↑Caucasian |

<sup>†</sup>data adjusted for tumour content using CK staining values

<sup>‡</sup>2-sided p-value from Wilcoxon Mann-Whitney test

**Supplementary Figure 1.** Tabular diagram of log fold-change of gene expression before and after RUV-4 adjustment on Affymetrix data. Genes in diagram selected based on those found to be up- / down- regulated in Eastern versus Western gastric tumours in a previous publication[11]. In general, genes known to be up-regulated in Asian compared to non-Asian gastric tumours (pink) are more consistently up-regulated after RUV-4, in comparison to the values obtained prior to RUV4-adjustment. The same can also be said of genes known to be up-regulated in non-Asian compared to Asian gastric tumours (green).

| Category | genes  | original analysis           |                     |                                       |                     |
|----------|--------|-----------------------------|---------------------|---------------------------------------|---------------------|
|          |        | unadjusted                  |                     | RUV-4 adjusted Affymetrix data, k=125 |                     |
|          |        | log.FC (Asian vs non.Asian) | p.value             | log.FC (Asian vs non.Asian)           | p.value             |
| Up.East  | PDGFRA | -0.44                       | $4 \times 10^{-12}$ | 0.16                                  | 0.20                |
| Up.East  | ADH1C  | 0.004                       | 0.99                | 1.64                                  | 0.006               |
| Up.East  | ADH4   | -0.69                       | $4 \times 10^{-09}$ | -0.07                                 | 0.85                |
| Up.West  | KRT10  | 1.16                        | $3 \times 10^{-57}$ | 0.70                                  | $3 \times 10^{-04}$ |
| Up.West  | KRT13  | -0.52                       | $6 \times 10^{-04}$ | -1.59                                 | $5 \times 10^{-04}$ |
| Up.West  | KRT14  | -0.26                       | 0.04                | -1.05                                 | $7 \times 10^{-04}$ |
| Up.West  | KRT15  | 0.29                        | 0.05                | -1.23                                 | 0.002               |
| Up.West  | KRT16  | 0.31                        | 0.01                | -1.05                                 | 0.003               |
| Up.West  | KRT19  | -0.05                       | 0.69                | -1.07                                 | $5 \times 10^{-05}$ |
| Up.West  | KRT20  | -0.30                       | 0.40                | -2.42                                 | $2 \times 10^{-04}$ |

**Supplementary Figure 2. (A)** Regression coefficients showing up-regulated (positive beta) and down-regulated (negative beta) proliferative genes in Affymetrix-based studies prior (purple, top diagram) and after (orange, bottom diagram) RUV-4 adjustment. As shown, before RUV-4 most of the proliferative genes are up-regulated in Asian (red arrow) compared to non-Asian (blue arrow) gastric tumours; the trend is reversed after RUV-4 adjustment. **(B)** Box-plots of proliferative marker (Ki-67) immunohistochemical assessments in Caucasian (blue) versus Japanese (red) cohorts. Caucasian gastric tumours have significantly higher proliferation (as measured by Ki-67 levels) compared to tumours of the Japanese cohort. \*\*\* indicates a significant (Wilcoxon Mann-Whitney test  $p < 0.05$ ) difference in composition.

**A**

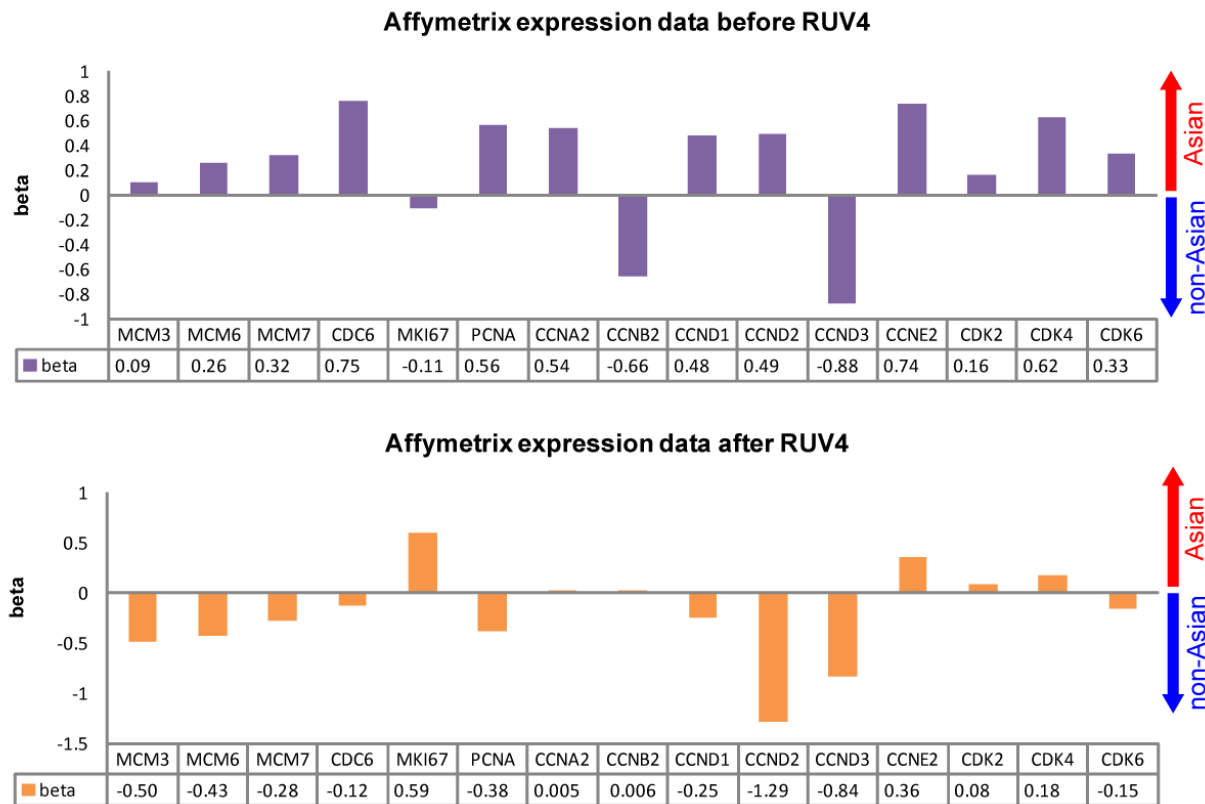

**B**

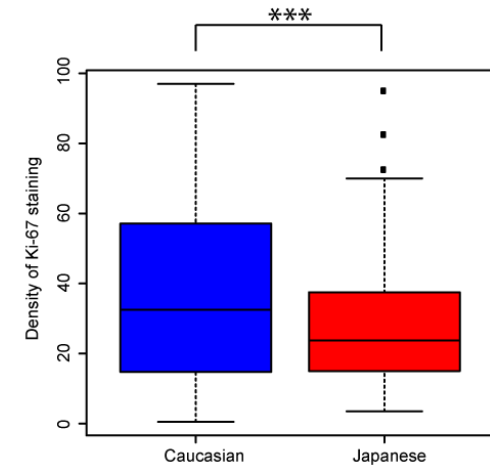

**Supplementary Figure 3. (A)** Hierarchical clustering of sample expression profiles before adjustment for unwanted variation; as indicated by the coloured stacked bars under the dendrogram, they segregate mainly by “study”, but not by “locality”, “stage”, “histology” and “age”. A certain level of confounding can be seen between “study” and “locality” since they tended to cluster in a similar manner **(B)** To illustrate the effectiveness of *RUV-4* for cohort adjustment compared to *standard regression with dummy variables*, using simulations to assess signal-to-noise ratios before and after adjustment. Adjustment using *standard dummy variable regression* removes not only variation due to cohorts but also location-specific effects, thus leaving behind only unknown and unwanted variation (i.e.  $w$ ) in the data. In contrast, by applying *RUV-4*, we are able to reduce the impact of unwanted variation between (and within) cohorts while preserving locality-specific variation, and retaining high signal-to-noise ratio without over-adjustment.

**(A)**

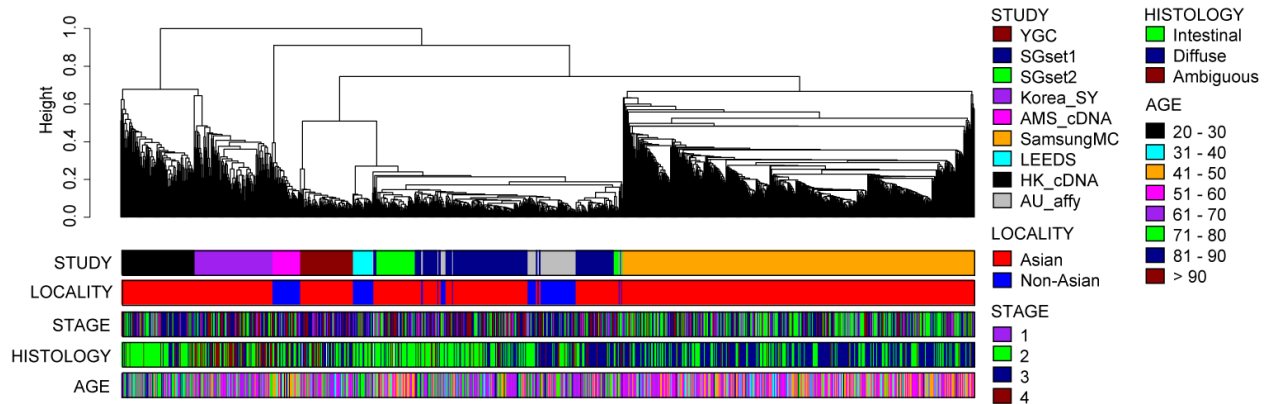

**(B)**

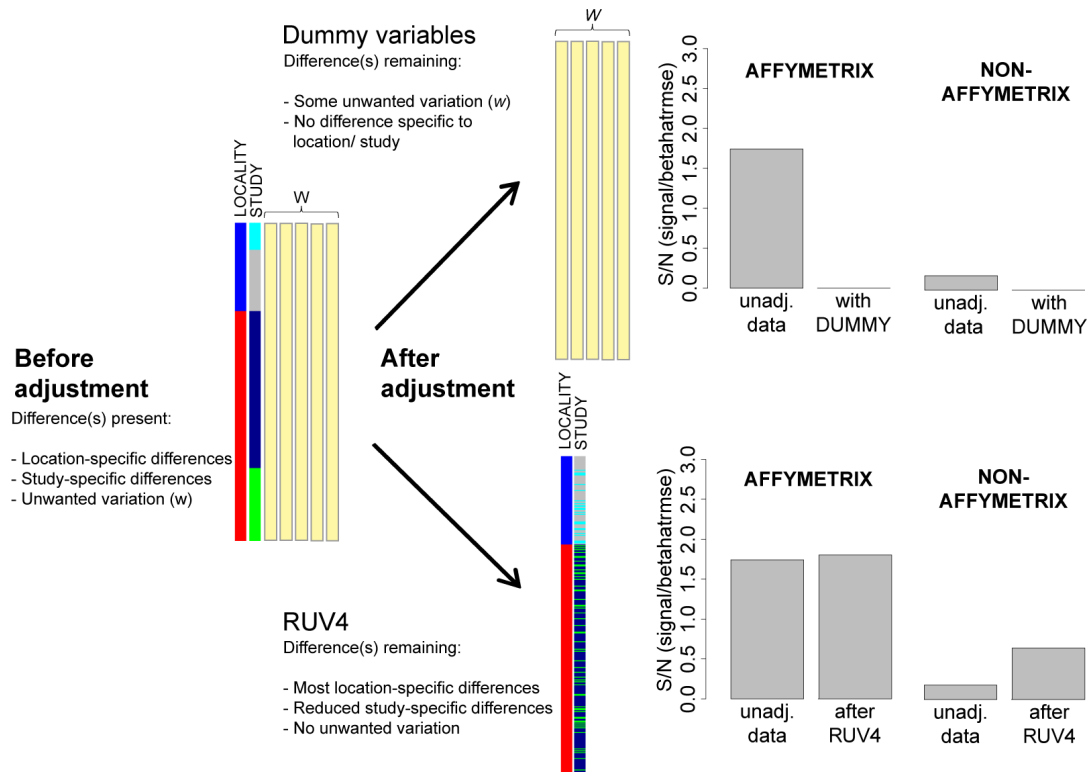

**Supplementary Figure 4.** A pairs-plot of mean expression profiles from the datasets; Affymetrix-based studies were more comparable than studies profiled on other platforms.

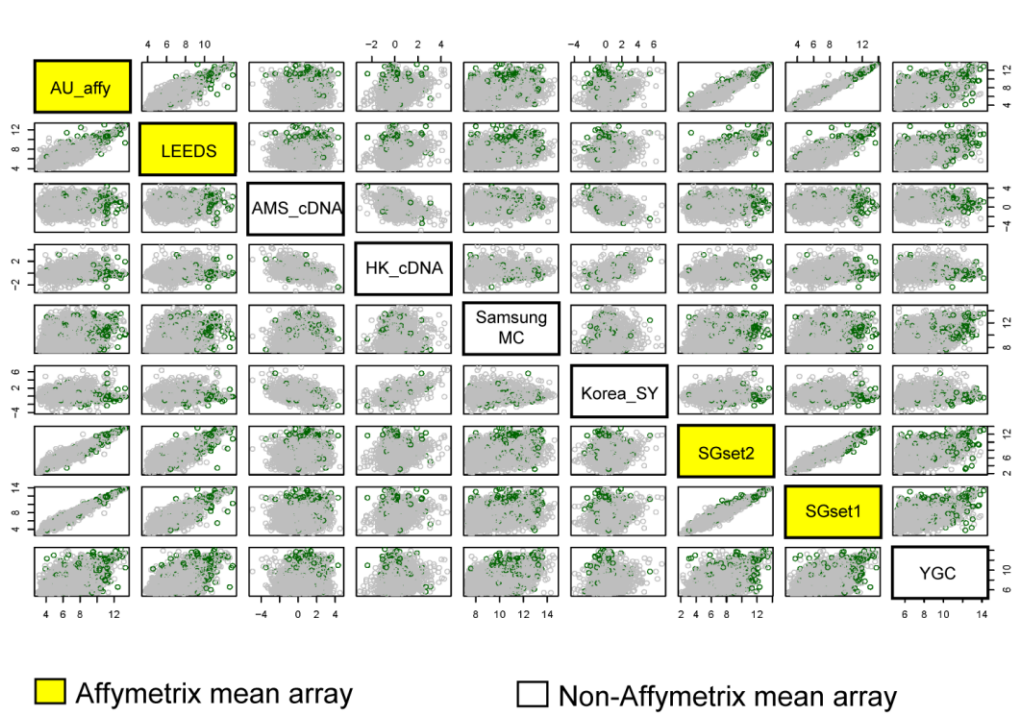



**Supplementary Figure 5.** Venn diagram of genes that constitute the inflammatory disease major pathway in Asian versus non-Asian gastric tumors shows no overlap.

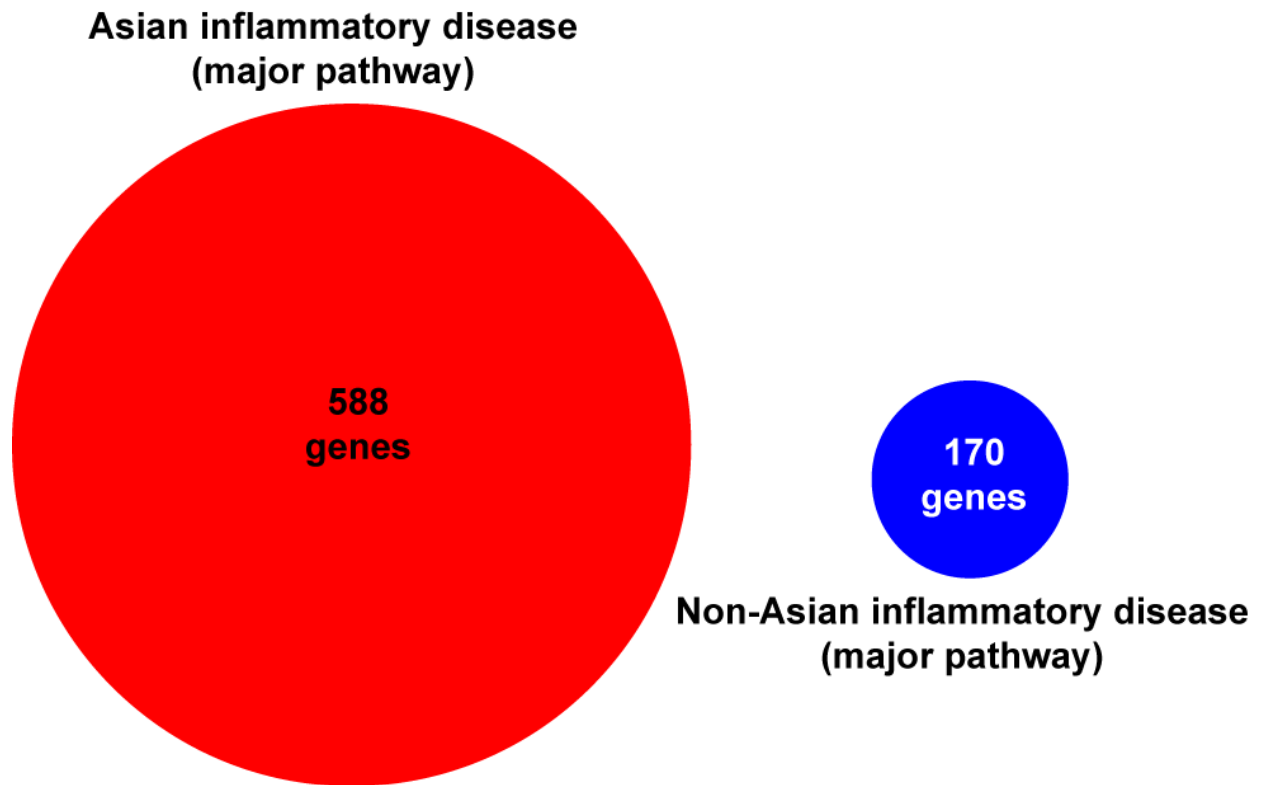

**Supplementary Figure 6.** Immunohistochemistry assessment of pan-leukocyte CD45 staining in Japanese (red) compared to Caucasian (blue) gastric cancers.

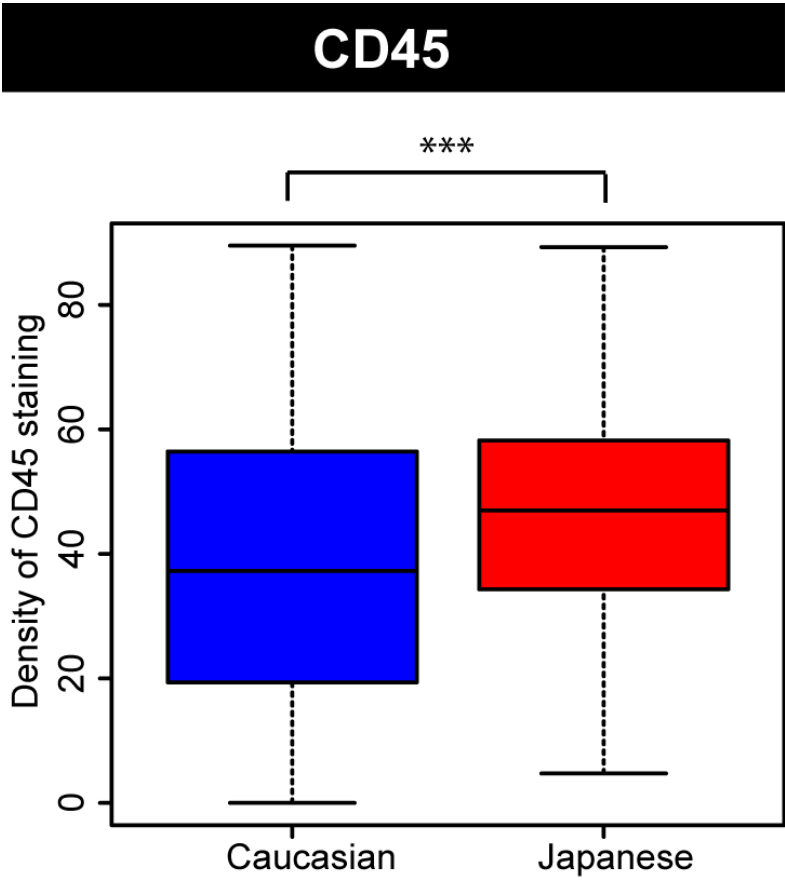

**Supplementary Figure 7.** Diagram to illustrate a multivariate Cox model fitted with both locality and chemotherapy factors (orange box) and fitted, in turn, with each of the respective factors (e.g. AJCC staging, Age, CD3 etc.). Adjusted hazard ratios (HR) and their corresponding p-values for geographic locality<sup>t</sup> are presented. All factors causing a change in significance of locality-specific prognosis are coloured in red text.

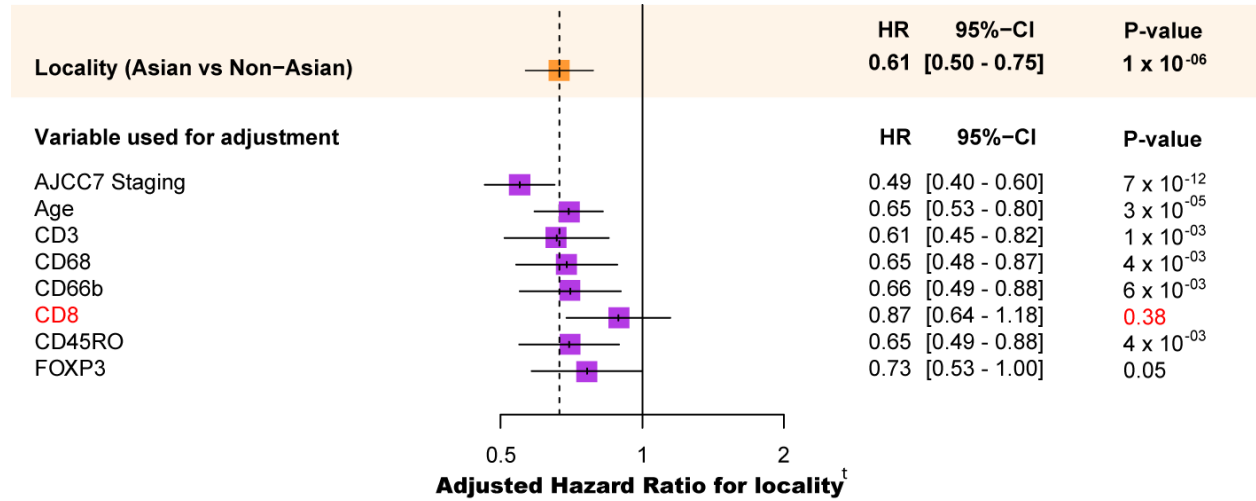

<sup>t</sup>adjusted for chemotherapy factor.

**Supplementary Figure 8. (A)** Each line in the diagram represents outcomes (e.g. hazard ratios and p-values) of fitting a univariate Cox model on the individual listed factors. Significant factors (Wald test  $p < 0.05$ ) are highlighted in red font. **(B)** Each line in the diagram represents outcomes (e.g. hazard ratios and p-values) of fitting a multivariate Cox model with all the listed factors. Significant factors (Wald test  $p < 0.05$ ) are highlighted in red font. The diagram shows that CD3 level in the highest quantile is a significant prognosticator for better survival, while CD68 levels in the second and third quantiles are significant prognosticators for worse survival. However, note that the relationship between CD3 (or CD68) marker level and prognosis is non-linear.

**(A)**

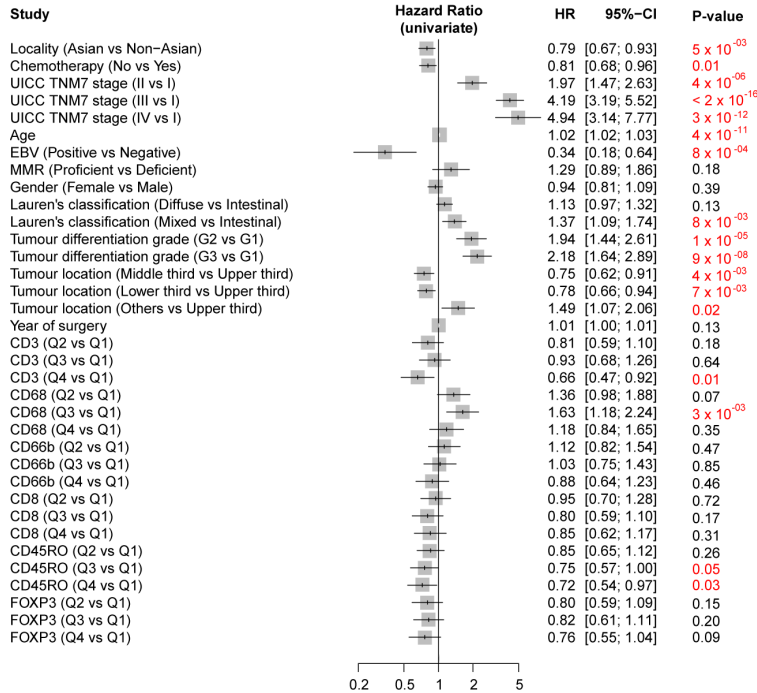

**(B)**

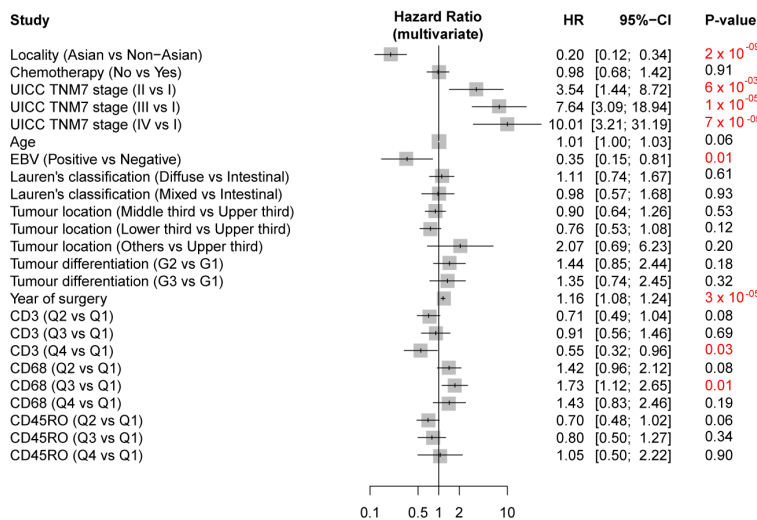

**Supplementary Figure 9.** Example Kaplan-Meier survival curves of CD68/CD3 high versus CD68/CD3 low groups in expression microarray cohorts show that high CD68/CD3 ratios are associated with worse overall survival.

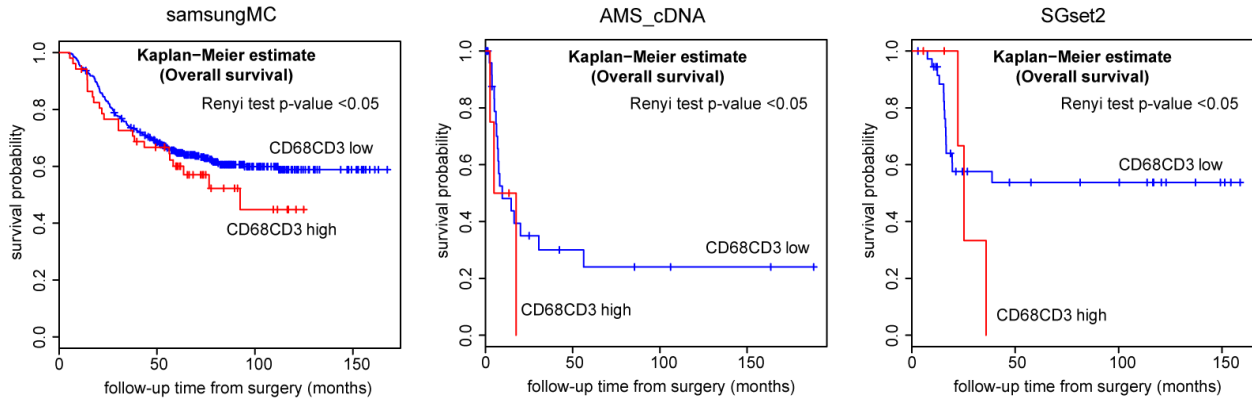

**Supplementary Figure 10.** EBV status assessments of patients in Japanese and Caucasian tissue microarray cohorts (TMA IHC). In the TMA IHC cohorts, the levels of EBV positivity in Japanese cohort (12 of total n = 216; 6%) is not significantly (Chi-square test  $p > 0.05$ ) different from that in the Caucasian cohort (15 of total n = 437; 3%).

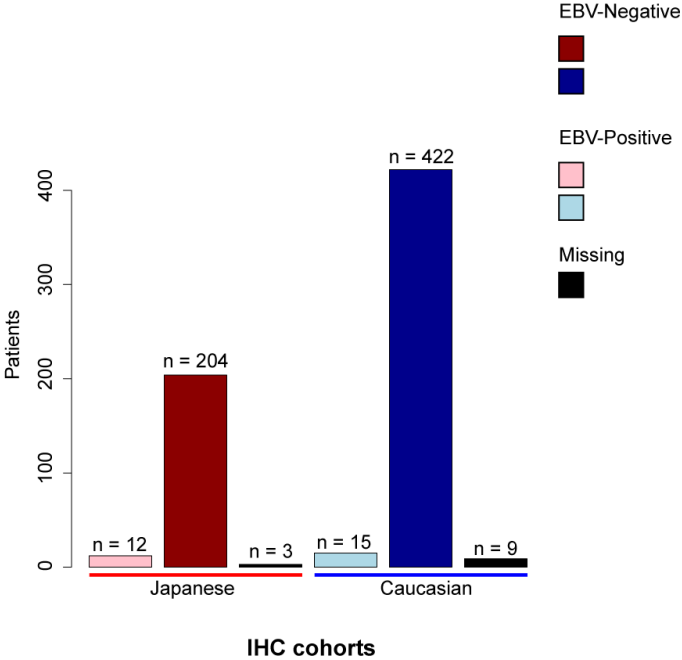

**Supplementary Figure 11.** DNA Mismatch Repair (MMR) status assessments in the Japanese and Caucasian tissue microarray cohorts (TMA IHC). In the IHC cohorts, the levels of MMR deficiency in Japanese cohort (21 of total n = 216; 10%) is not significantly (Chi-square test  $p > 0.05$ ) different from that in the Caucasian cohort (13 of total n = 175; 7%).

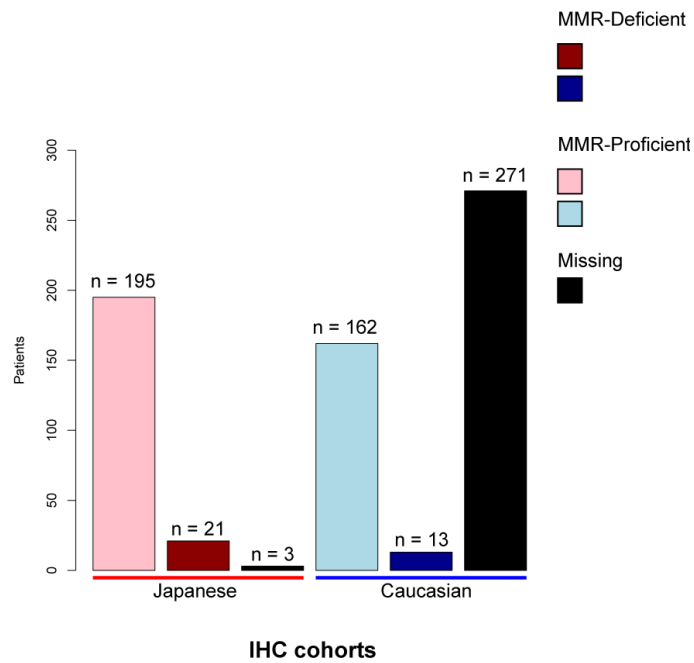

**Supplementary Figure 12.** Assessment of association of immune markers with Lauren's classification. Hypothesis testing of difference across subtypes with immune marker levels assessed using Kruskal-Wallis test. P-values reported are 2-tailed.

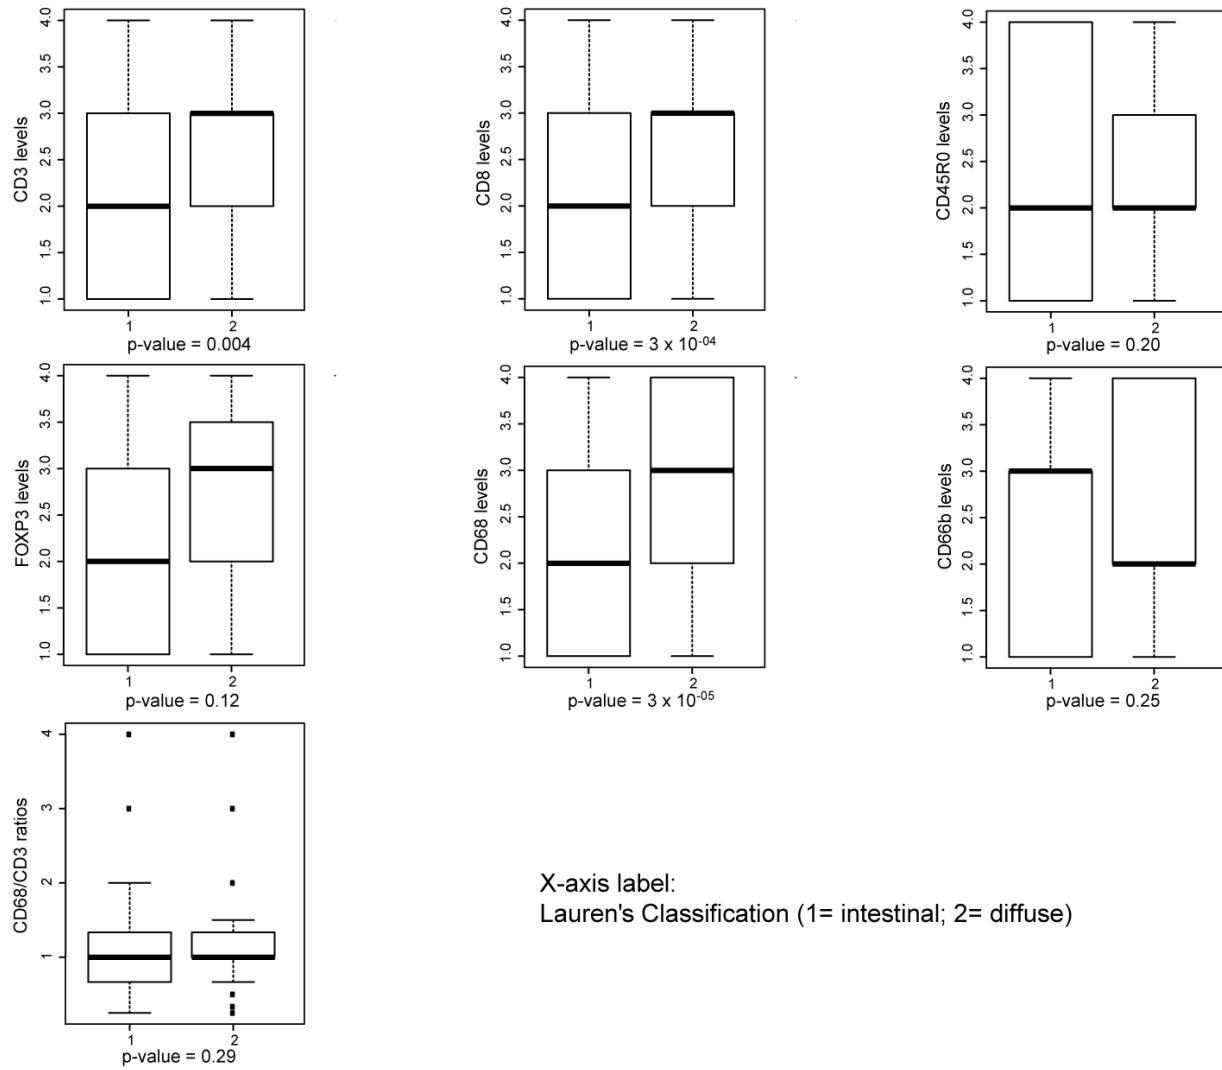



**Supplementary Figure 13.** Assessment of association of immune markers with tumour location. Hypothesis testing of difference across tumour locations with immune marker levels assessed using Kruskal-Wallis test. P-values reported are 2-tailed.

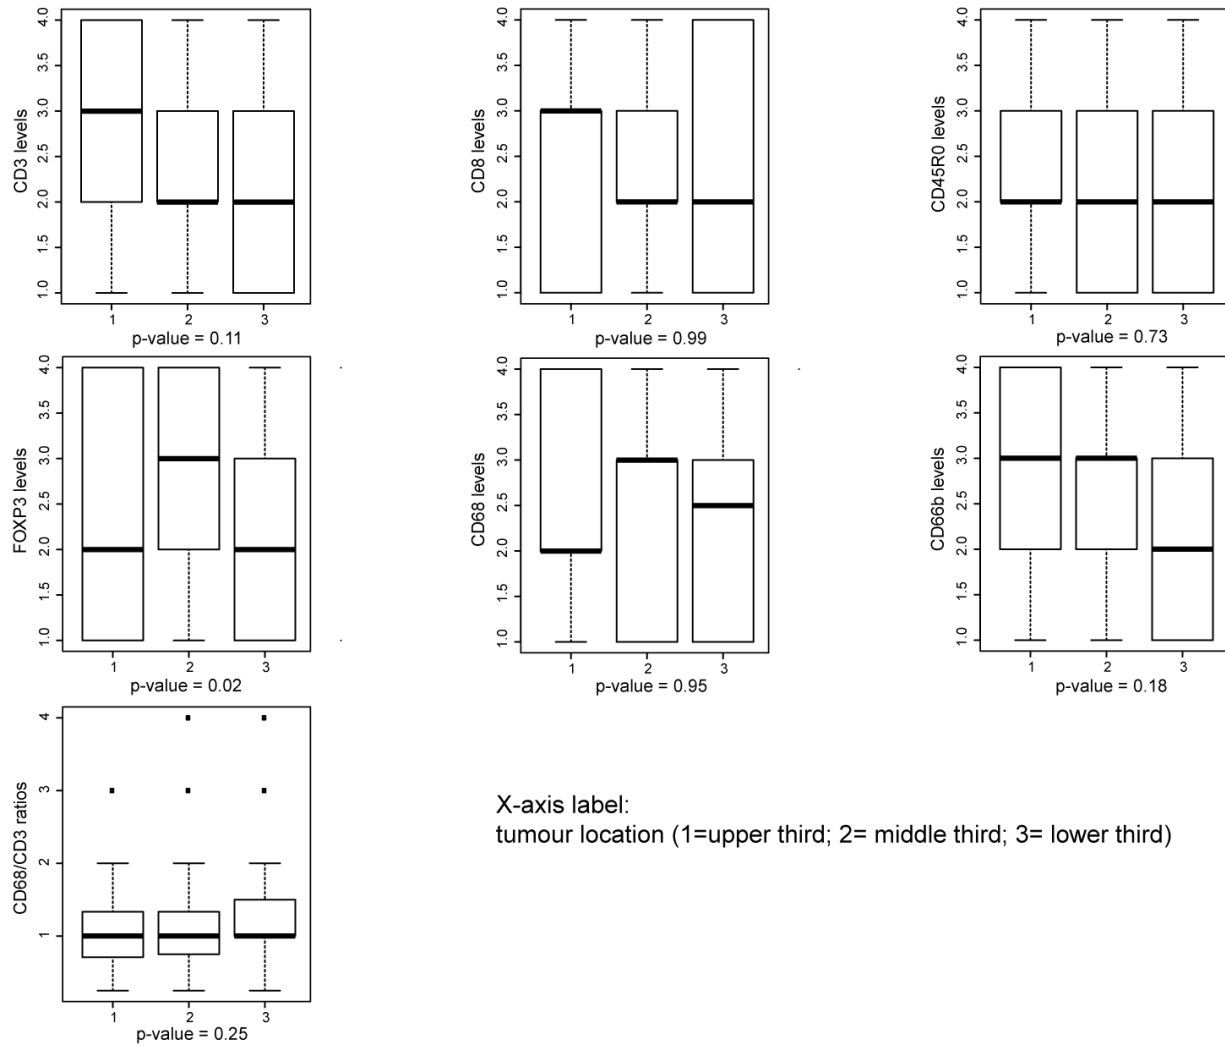

X-axis label:  
tumour location (1=upper third; 2= middle third; 3= lower third)

**Supplementary Figure 14.** Assessment of association of immune markers with gender. Hypothesis testing of difference across gender groups with immune marker levels assessed using Kruskal-Wallis test. P-values reported are 2-tailed.

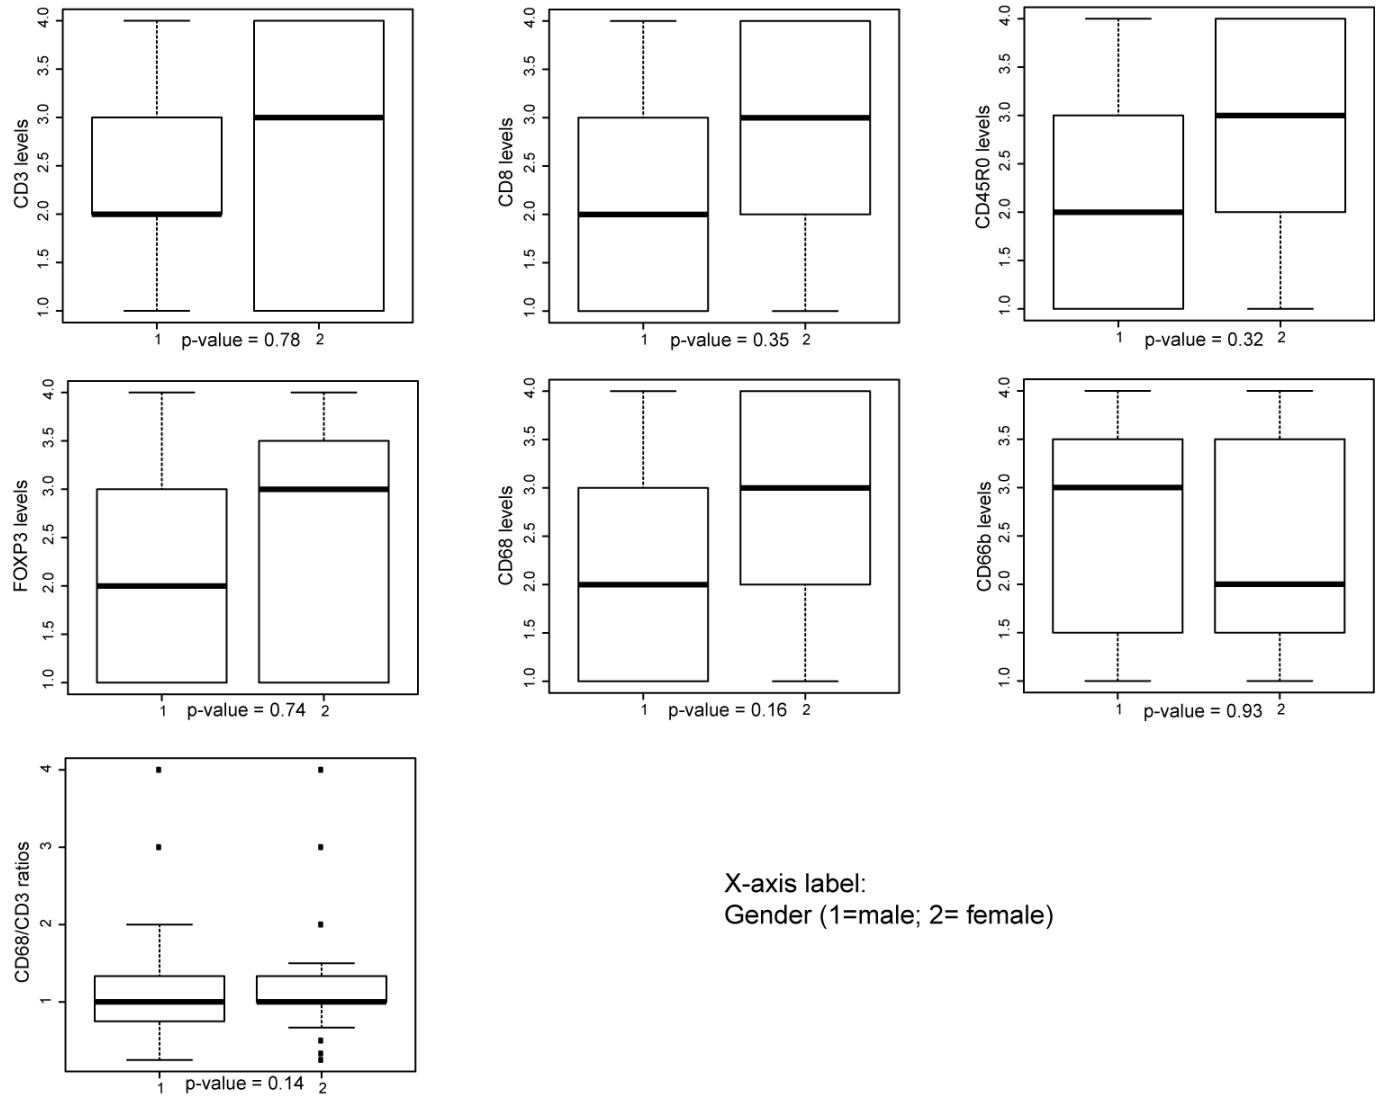

X-axis label:  
Gender (1=male; 2= female)

## References

- 1 Bolstad BM, Irizarry RA, Astrand M, Speed TP. A comparison of normalization methods for high density oligonucleotide array data based on variance and bias. *Bioinformatics* 2003;**19**:185-93.
- 2 Gagnon-Bartsch Johann A. JL, and Speed Terence P. Removing Unwanted Variation from High Dimensional Data with Negative Controls. 2013.
- 3 Gagnon-Bartsch JA, Speed TP. Using control genes to correct for unwanted variation in microarray data. *Biostatistics* 2012;**13**:539-52.
- 4 Smyth GK. Linear models and empirical bayes methods for assessing differential expression in microarray experiments. *Statistical applications in genetics and molecular biology* 2004;**3**:Article3.
- 5 Johnson WE, Li C, Rabinovic A. Adjusting batch effects in microarray expression data using empirical Bayes methods. *Biostatistics* 2007;**8**:118-27.
- 6 Sun Y, Zhang N, Owen AB. Multiple hypothesis testing, adjusting for latent variables., 2011.
- 7 Stegle O, Kannan A, Durbin R, Winn J. Accounting for non-genetic factors improves the power of eQTL studies.: Springer-Verlag, 2008.
- 8 Leek JT, Storey JD. A general framework for multiple testing dependence. *Proceedings of the National Academy of Sciences of the United States of America* 2008;**105**:18718-23.
- 9 Leek JT, Storey JD. Capturing heterogeneity in gene expression studies by surrogate variable analysis. *PLoS genetics* 2007;**3**:1724-35.
- 10 Desai KE, Storey JD. Cross-Dimensional Inference of Dependent High-Dimensional Data. *Journal of the American Statistical Association* 2012;**107**:135-51.
- 11 Ossandon FJ, Villarroel C, Aguayo F, Santibanez E, Oue N, Yasui W, *et al.* In silico analysis of gastric carcinoma Serial Analysis of Gene Expression libraries reveals different profiles associated with ethnicity. *Molecular cancer* 2008;**7**:22.
- 12 Wang XQ, Li H, Van Putten V, Winn RA, Heasley LE, Nemenoff RA. Oncogenic K-Ras regulates proliferation and cell junctions in lung epithelial cells through induction of cyclooxygenase-2 and activation of metalloproteinase-9. *Molecular biology of the cell* 2009;**20**:791-800.
- 13 Tuveson DA, Shaw AT, Willis NA, Silver DP, Jackson EL, Chang S, *et al.* Endogenous oncogenic K-ras(G12D) stimulates proliferation and widespread neoplastic and developmental defects. *Cancer cell* 2004;**5**:375-87.
- 14 Freeman A, Morris LS, Mills AD, Stoeber K, Laskey RA, Williams GH, *et al.* Minichromosome maintenance proteins as biological markers of dysplasia and malignancy. *Clinical cancer research : an official journal of the American Association for Cancer Research* 1999;**5**:2121-32.
- 15 Gerdes J, Lemke H, Baisch H, Wacker HH, Schwab U, Stein H. Cell cycle analysis of a cell proliferation-associated human nuclear antigen defined by the monoclonal antibody Ki-67. *J Immunol* 1984;**133**:1710-5.
- 16 Deshpande A, Sicinski P, Hinds PW. Cyclins and cdks in development and cancer: a perspective. *Oncogene* 2005;**24**:2909-15.
- 17 Subramanian A, Tamayo P, Mootha VK, Mukherjee S, Ebert BL, Gillette MA, *et al.* Gene set enrichment analysis: a knowledge-based approach for interpreting genome-wide expression profiles. *Proceedings of the National Academy of Sciences of the United States of America* 2005;**102**:15545-50.
- 18 Lovett S, A. W, Treanor D, Ward LC, Grabsch HI. The Presence of Macrophages is Related to Tumour Cell Density in Gastric Cancer – A Pilot Study Comparing Automated Image Analysis with Subjective Scoring in Full Sections and Virtual Tissue Cores? . 202nd Scientific Meeting of the Pathological Society of Great Britain & Ireland, 3–5 July: *Journal of Pathology* 2012:S26.
- 19 Grabsch H, Sivakumar S, Gray S, Gabbert HE, Muller W. HER2 expression in gastric cancer: Rare, heterogeneous and of no prognostic value - conclusions from 924 cases of two independent series. *Cellular oncology : the official journal of the International Society for Cellular Oncology* 2010;**32**:57-65.
- 20 Wright A HG, Randell R, Quirke P, Treanor D. . TMAi (Tissue MicroArray informatics): Using virtual slides and open standards to provide usability and interoperability for tissue microarrays in clinical trials. Liverpool, UK: 6th NCRI Cancer Conference, National Cancer Research Institute, 2010.
- 21 Grogg KL, Lohse CM, Pankratz VS, Halling KC, Smyrk TC. Lymphocyte-rich gastric cancer: associations with Epstein-Barr virus, microsatellite instability, histology, and survival. *Modern pathology : an official journal of the United States and Canadian Academy of Pathology, Inc* 2003;**16**:641-51.
- 22 Nakamura S, Ueki T, Yao T, Ueyama T, Tsuneyoshi M. Epstein-Barr virus in gastric carcinoma with lymphoid stroma. Special reference to its detection by the polymerase chain reaction and in situ hybridization in 99 tumors, including a morphologic analysis. *Cancer* 1994;**73**:2239-49.

- 23 Landais E, Saulquin X, Houssaint E. The human T cell immune response to Epstein-Barr virus. *The International journal of developmental biology* 2005;**49**:285-92.
- 24 Leung SY, Yuen ST, Chung LP, Chu KM, Wong MP, Branicki FJ, *et al.* Microsatellite instability, Epstein-Barr virus, mutation of type II transforming growth factor beta receptor and BAX in gastric carcinomas in Hong Kong Chinese. *British journal of cancer* 1999;**79**:582-8.
